# Supplementary material for: Genomic and Genetic Insights into Mendel’s Pea Genes
Source: Research Square preprint supplement (doi:10.21203/rs.3.rs-4509291/v1), 2024-06-12
Supplement: Supplementary file 1 [file 40cc40b0abf7371b33474091.xlsx]

## Sheet: Table S12, Rr
Supplementary Table 12. Round and Wrinkled seed and the SBE1 gene haplotypes. For each accession, the haplotype assignment (after haplotype cluster analysis) with corressponding phenotypic characteristics (after haplotype-phenotype association study) is given; the presence of the Ipr-s insertion, including allelic variation correlated with the Ipr-s insertion event is given.
Sample	Haplotype ID assigned manually	Ipr-s insertion	chr3_108351072_G/T (most significant SNP)	Phenotype for GWAS	Seed Shape_JIC_Un (JIC England Spherical=1 Marrowfat=2 Dimpled (mifo)=3 Dentate=4 Wrinkled=5 Very wrinkled=6)	Seed Shape_Harbin_2022 (Harbin China, 2022) Round=1 Wrinkled=2 Half wrinkled=3)	Seed Shape_Shenzhen_2021(Shenzhen China 2021 Round=1 Wrinkled=2 Half wrinkled=3)
JI2089	1	absent	0|0	4	4	3	NA
JI0950	1	absent	0|0	1	1	NA	1
JI2048	1	absent	0|0	2	2	3	NA
JI1246	1	absent	0|0	1	1	NA	1
JI0083	1	absent	0|0	1	1	3	2
JI0128	1	absent	0|0	1	1	3	2
FN2076_5	1	absent	0|0	NA	NA	2	2
JI2822	1	absent	0|0	6	6	2	2
JI0015	1	absent	0|0	2	2	3	2
JI0048	1	absent	0|0	4	4	NA	2
JI2716	1	absent	0|0	4	4	3	2
FN1453	1	absent	0|0	NA	NA	NA	NA
JI1865	1	absent	0|0	4	4	3	NA
JI0340	1	absent	0|0	3	3	3	2
JI0132	1	absent	0|0	4	4	3	2
JI3022	1	absent	0|0	4	4	3	2
JI2331	1	absent	0|0	1	1	NA	NA
JI0267	1	absent	0|0	1	1	1	NA
JI0795	1	absent	0|0	1	1	NA	2
JI0391	1	absent	0|0	1	1	1	1
JI2776	1	absent	0|0	4	4	NA	2
FN2026_7	1	absent	0|0	NA	NA	2	NA
JI3604	1	absent	0|0	NA	NA	NA	NA
JI0024	1	absent	0|0	1	1	1	NA
JI0371	1	absent	0|0	1	1	3	2
JI1071	1	absent	0|0	4	4	3	2
JI0699	1	absent	0|0	1	1	1	1
JI0275	1	absent	0|0	1	1	3	2
JI1793	1	absent	0|0	4	4	NA	2
JI2311	1	absent	0|0	4	4	3	2
JI0162	1	absent	0|0	4	4	3	NA
JI1996	1	absent	0|0	4	4	3	2
JI1882	1	absent	0|0	4	4	1	1
JI1538	1	absent	0|0	4	4	2	NA
JI1132	1	absent	0|0	1	1	NA	2
JI1086	1	absent	0|0	1	1	1	2
JI2707	1	absent	0|0	3	3	3	1
JI2312	1	absent	0|0	4	4	3	2
JI0364	1	absent	0|0	3	3	3	2
JI0028	1	absent	0|0	4	4	3	2
JI1088	1	absent	0|0	1	1	3	1
JI1863	1	absent	0|0	4	4	2	2
JI0018	1	absent	0|0	1	1	3	2
JI0150	1	absent	0|0	4	4	3	2
JI1900	1	absent	0|0	4	4	3	2
JI3614	1	absent	0|0	NA	NA	1	2
JI0138	1	absent	0|0	1	1	NA	NA
JI0794	1	absent	0|0	4	4	1	NA
JI0466	1	absent	0|0	1	1	1	1
JI0148	1	absent	0|0	4	4	3	2
JI3186	1	absent	0|0	2	2	2	2
JI0014	1	absent	0|0	1	1	3	2
JI2228	1	absent	0|0	3	3	3	2
JI3148	1	absent	0|0	1	1	NA	2
JI2279	1	absent	0|0	4	4	3	2
JI1528	1	absent	0|0	4	4	3	NA
JI1626	1	absent	0|0	4	4	3	2
JI1087	1	absent	0|0	4	4	3	NA
JI2561	1	absent	0|0	4	4	1	NA
JI0152	1	absent	0|0	2	2	3	2
JI0058	1	absent	0|0	4	4	3	NA
JI2583	1	absent	0|0	4	4	3	NA
JI0245	1	absent	0|0	1	1	3	1
JI2559	1	absent	0|0	4	4	3	2
JI1846	1	absent	0|0	4	4	3	NA
JI0055	1	absent	0|0	1	1	1	NA
JI2223	1	absent	0|0	1	1	3	NA
JI0295	1	absent	0|0	4	4	3	NA
JI0268	1	absent	0|0	1	1	3	2
JI1043	1	absent	0|0	4	4	1	2
JI2764	1	absent	0|0	1	1	NA	1
JI2753	1	absent	0|0	1	1	NA	1
JI0932	1	absent	0|0	1	1	NA	1
JI2695	1	absent	0|0	4	4	3	NA
JI1851	1	absent	0|0	4	4	3	NA
JI2084	1	absent	0|0	4	4	3	NA
JI0247	1	absent	0|0	1	1	3	2
JI3096	1	absent	0|0	1	1	3	2
JI3610	1	absent	0|0	NA	NA	NA	1
JI1573	1	absent	0|0	1	1	NA	1
JI2110	1	absent	0|0	6	6	NA	2
JI0800	1	absent	0|0	2	2	NA	2
JI0221	1	absent	0|0	1	1	NA	2
JI2761	1	absent	0|0	2	2	3	2
JI1698	1	absent	0|0	4	4	3	NA
JI2659	1	absent	0|0	1	1	3	2
JI0695	1	absent	0|0	2	2	3	2
JI3611	1	absent	0|0	NA	NA	NA	2
JI2274	1	absent	0|0	1	1	1	2
JI0358	1	absent	0|0	1	1	3	2
JI3609	1	absent	0|0	NA	NA	1	NA
JI2623	1	absent	0|0	2	2	NA	2
JI0154	1	absent	0|0	4	4	3	2
JI0044	1	absent	0|0	1	1	1	NA
JI0952	1	absent	0|0	2	2	3	2
JI2436	1	absent	0|0	2	2	3	2
JI1535	1	absent	0|0	1	1	2	1
JI0339	1	absent	0|0	4	4	3	2
JI3605	1	absent	0|0	2	2	NA	2
JI1722	1	absent	0|0	2	2	2	2
JI0354	1	absent	0|0	1	1	3	NA
JI1714	1	absent	0|0	2	2	NA	NA
JI0566	1	absent	0|0	2	2	NA	NA
JI0378	1	absent	0|0	1	1	3	2
JI0380	1	absent	0|0	4	4	3	2
JI0060	1	absent	0|0	4	4	3	2
JI0787	1	absent	0|0	1	1	1	1
JI0974	1	absent	0|0	2	2	NA	2
JI0734	1	absent	0|0	4	4	3	2
JI1911	2	absent	0|0	4	4	3	2
JI1002	2	absent	0|0	1	1	NA	1
JI0118	2	absent	0|0	1	1	1	NA
JI0040	2	absent	0|0	1	1	3	2
JI0180	2	absent	0|0	4	4	3	NA
JI0167	2	absent	0|0	2	2	3	2
JI1222	2	absent	0|0	1	1	3	1
JI1217	2	absent	0|0	1	1	NA	NA
JI3030	2	absent	0|0	4	4	3	2
JI2105	2	absent	0|0	4	4	3	NA
JI1870	2	absent	0|0	4	4	3	2
JI2236	2	absent	0|0	4	4	3	2
JI1968	2	absent	0|0	4	4	3	2
JI0200	2	absent	0|0	4	4	NA	NA
JI1345	2	absent	0|0	1	1	1	2
JI3167	2	absent	0|0	1	1	1	1
JI1933	2	absent	0|0	4	4	3	2
JI1219	2	absent	0|0	NA	NA	NA	1
JI1816	2	absent	0|0	1	1	3	2
JI1625	2	absent	0|0	4	4	3	2
JI2134	2	absent	0|0	4	4	3	2
JI1055	2	absent	0|0	1	1	1	1
JI0703	2	absent	0|0	4	4	1	2
JI2152	2	absent	0|0	4	4	2	NA
JI1735	2	absent	0|0	1	1	NA	1
JI1125	2	absent	0|0	1	1	2	2
JI1524	2	absent	0|0	1	1	3	NA
JI0116	2	absent	0|0	4	4	3	NA
JI0820	2	absent	0|0	1	1	NA	2
JI0270	2	absent	0|0	1	1	3	2
JI0712	2	absent	0|0	1	1	1	1
JI0692	2	absent	0|0	4	4	3	2
JI0071	2	absent	0|0	1	1	1	NA
JI1486	2	absent	0|0	1	1	3	2
JI1129	2	absent	0|0	1	1	NA	2
JI0705	2	absent	0|0	4	4	1	NA
JI2649	2	absent	0|0	1	1	1	1
JI0949	2	absent	0|0	1	1	NA	1
JI1548	2	absent	0|0	1	1	3	2
JI2647	2	absent	0|0	1	1	1	1
JI0216	2	absent	0|0	1	1	1	1
JI1344	2	absent	0|0	1	1	1	1
JI1307	2	absent	0|0	1	1	3	2
JI1547	2	absent	0|0	1	1	3	NA
JI1477	2	absent	0|0	4	4	3	2
JI1492	2	absent	0|0	1	1	NA	2
JI0863	2	absent	0|0	4	4	NA	NA
JI1058	2	absent	0|0	1	1	3	1
JI0892	2	absent	0|0	3	3	3	NA
JI0893	2	absent	0|0	3	3	3	1
JI2114	2	absent	0|0	1	1	1	1
JI1503	2	absent	0|0	1	1	NA	1
JI2648	2	absent	0|0	1	1	3	2
JI2061	2	absent	0|0	1	1	3	NA
JI1669	2	absent	0|0	4	4	NA	2
Baryton	2	absent	0|0	NA	NA	1	1
JI1713	2	absent	0|0	NA	NA	3	2
JI1891	2	absent	0|0	4	4	3	2
JI2350	2	absent	0|0	1	1	1	1
JI1920	2	absent	0|0	4	4	3	2
JI2174	2	absent	0|0	4	4	3	2
JI0090	2	absent	0|0	4	4	3	2
JI2154	2	absent	0|0	4	4	3	2
JI1915	2	absent	0|0	1	1	3	2
JI3179	2	absent	0|0	1	1	3	2
JI2332	2	absent	0|0	1	1	NA	NA
JI0057	2	absent	0|0	1	1	NA	NA
JI0233	2	absent	0|0	4	4	3	NA
JI0133	2	absent	0|0	1	1	1	NA
JI1792	2	absent	0|0	1	1	NA	1
JI2693	2	absent	0|0	4	4	3	2
JI1224	2	absent	0|0	2	2	2	2
JI2233	2	absent	0|0	1	1	1	NA
JI0854	2	absent	0|0	3	3	3	2
JI0034	2	absent	0|0	1	1	1	2
JI1085	2	absent	0|0	4	4	3	2
JI2344	2	absent	0|0	1	1	1	1
JI3178	2	absent	0|0	4	4	1	2
JI3163	2	absent	0|0	1	1	NA	NA
JI2353	2	absent	0|0	1	1	NA	1
JI0012	2	absent	0|0	1	1	3	NA
JI2058	2	absent	0|0	1	1	1	2
JI0125	2	absent	0|0	1	1	NA	1
JI1398	2	absent	0|0	1	1	1	NA
JI0965	2	absent	0|0	1	1	1	NA
JI2296	2	absent	0|0	1	1	1	1
JI0006	2	absent	0|0	4	4	3	NA
JI1491	2	absent	0|0	1	1	1	NA
JI2243	2	absent	0|0	1	1	1	2
JI0887	2	absent	0|0	3	3	3	1
JI2742	2	absent	0|0	4	4	3	2
JI0957	2	absent	0|0	1	1	NA	NA
JI2193	2	absent	0|0	1	1	1	1
JI2314	2	absent	0|0	1	1	NA	NA
JI0222	2	absent	0|0	1	1	NA	1
JI0220	2	absent	0|0	4	4	3	2
JI1482	2	absent	0|0	4	4	3	2
JI1817	2	absent	0|0	1	1	1	1
JI0323	2	absent	0|0	1	1	1	1
JI2321	2	absent	0|0	1	1	1	1
JI0693	2	absent	0|0	3	3	3	NA
JI0423	2	absent	0|0	4	4	1	1
JI2036	2	absent	0|0	3	3	NA	2
JI1187	2	absent	0|0	3	3	NA	2
JI2324	2	absent	0|0	1	1	1	1
JI1768	2	absent	0|0	1	1	1	NA
JI1082	2	absent	0|0	1	1	1	1
JI0424	2	absent	0|0	1	1	1	1
JI1800	2	absent	0|0	1	1	NA	1
JI1718	2	absent	0|0	3	3	NA	2
JI3151	3	absent	0|0	1	1	NA	NA
JI3150	3	absent	0|0	1	1	NA	NA
JI3511	3	absent	0|0	1	1	NA	1
JI2629	3	absent	0|0	1	1	3	NA
JI2201	3	absent	0|0	1	1	NA	1
JI1989	3	absent	0|0	1	1	1	1
JI0813	3	absent	0|0	2	2	3	2
JI2153	3	absent	0|0	4	4	3	2
JI1894	3	absent	0|0	4	4	3	2
JI1519	3	absent	0|0	1	1	2	2
JI0368	3	absent	0|0	4	4	3	2
JI0124	3	absent	0|0	4	4	3	NA
JI0635	3	absent	0|0	4	4	NA	NA
JI0657	3	absent	0|0	2	2	3	2
JI1228	3	absent	0|0	NA	NA	3	2
JI1607	3	absent	0|0	4	4	3	2
JI2001	3	absent	0|0	4	4	NA	2
JI0971	3	absent	0|0	1	1	NA	1
JI0409	3	absent	0|0	2	2	3	2
JI1679	3	absent	0|0	4	4	3	2
JI1703	3	absent	0|0	4	4	3	1
JI1910	3	absent	0|0	4	4	3	2
JI0322	3	absent	0|0	1	1	3	2
JI2150	3	absent	0|0	4	4	3	2
JI1386	3	absent	0|0	2	2	3	2
JI1173	3	absent	0|0	2	2	2	2
JI0025	3	absent	0|0	1	1	3	2
JI0021	3	absent	0|0	4	4	3	2
JI0020	3	absent	0|0	4	4	3	NA
JI0062	3	absent	0|0	1	1	3	2
JI0175	3	absent	0|0	3	3	NA	NA
JI0176	3	absent	0|0	4	4	3	2
JI0516	3	absent	0|0	2	2	NA	2
JI0717	3	absent	0|0	2	2	3	2
JI1014	3	absent	0|0	2	2	3	2
JI1523	3	absent	0|0	4	4	NA	2
JI1592	3	absent	0|0	3	3	3	1
JI1652	3	absent	0|0	4	4	NA	NA
JI1706	3	absent	0|0	2	2	3	2
JI1995	3	absent	0|0	4	4	3	2
JI2157	3	absent	0|0	4	4	3	2
JI2329	3	absent	0|0	2	2	NA	2
JI3086	3	absent	0|0	4	4	3	2
Samson	3	absent	0|0	NA	NA	NA	1
JI0007	3	absent	0|0	4	4	3	2
JI1462	3	absent	0|0	1	1	3	2
JI0825	3	absent	0|0	1	1	1	2
JI0208	3	absent	0|0	1	1	1	NA
JI2671	3	absent	0|0	NA	NA	3	NA
JI2182	3	absent	0|0	4	4	3	2
JI0782	3	absent	0|0	2	2	1	NA
JI2300	3	absent	0|0	1	1	1	1
JI0955	3	absent	0|0	1	1	NA	1
JI0817	3	absent	0|0	3	3	NA	2
JI0735	3	absent	0|0	3	3	1	1
JI0177	3	absent	0|0	4	4	3	2
JI1577	3	absent	0|0	1	1	NA	NA
JI1266	3	absent	0|0	4	4	NA	2
JI0681	3	absent	0|0	3	3	NA	NA
JI2743	3	absent	0|0	4	4	3	2
JI0342	3	absent	0|0	4	4	NA	2
JI2277	3	absent	0|0	4	4	3	NA
JI1775	3	absent	0|0	1	1	3	2
JI2366	3	absent	0|0	2	2	NA	2
JI0859	3	absent	0|0	3	3	NA	2
JI2273	3	absent	0|0	3	3	3	2
JI1837	3	absent	0|0	1	1	1	1
JI1587	3	absent	0|0	2	2	1	1
JI0781	3	absent	0|0	3	3	NA	2
JI1850	3	absent	0|0	4	4	1	NA
JI1825	3	absent	0|0	1	1	1	NA
JI0616	3	absent	0|0	1	1	3	1
JI1699	3	absent	0|0	4	4	1	NA
JI0149	3	absent	0|0	NA	NA	3	2
JI2423	3	absent	0|0	NA	NA	1	NA
JI1705	3	absent	0|0	NA	NA	3	2
JI1212	3	absent	0|0	4	4	1	2
JI0711	3	absent	0|0	4	4	1	NA
JI1704	3	absent	0|0	NA	NA	3	2
JI1702	3	absent	0|0	4	4	3	2
JI3134	3	absent	0|0	1	1	3	NA
JI0205	3	absent	0|0	4	4	3	NA
JI0807	3	absent	0|0	1	1	3	NA
JI0146	3	absent	0|0	4	4	3	NA
JI3053	3	absent	0|0	1	1	NA	NA
JI0050	3	absent	0|0	4	4	3	2
JI3080	3	absent	0|0	1	1	3	NA
JI0246	3	absent	0|0	1	1	1	1
JI2115	3	absent	0|0	4	4	3	2
JI1835	3	absent	0|0	4	4	3	2
JI2116	3	absent	0|0	4	4	3	2
JI2149	3	absent	0|0	1	1	1	1
JI1834	3	absent	0|0	4	4	2	2
JI2156	3	absent	0|0	4	4	2	2
JI2129	3	absent	0|0	4	4	3	2
JI1059	3	absent	./.	NA	NA	NA	NA
JI0276	4	absent	0|0	4	4	NA	2
JI0086	4	absent	0|0	4	4	3	NA
JI0754	4	absent	0|0	3	3	NA	NA
JI2355	4	absent	0|0	4	4	NA	NA
JI2429	4	absent	0|0	4	4	3	2
JI1089	4	absent	0|0	4	4	3	1
JI1543	4	absent	0|0	1	1	3	1
JI2018	4	absent	0|0	4	4	3	2
JI0102	4	absent	0|0	4	4	3	2
JI0716	4	absent	0|0	4	4	3	2
JI0047	4	absent	0|0	1	1	3	NA
JI0147	4	absent	0|0	4	4	3	2
JI1109	4	absent	0|0	1	1	NA	NA
JI0098	4	absent	0|0	4	4	3	2
JI2348	4	absent	0|0	1	1	1	1
JI1578	4	absent	0|0	1	1	1	NA
JI0108	4	absent	0|0	1	1	3	NA
JI1117	4	absent	0|0	4	4	1	NA
JI1542	4	absent	0|0	1	1	2	2
JI0241	4	absent	0|0	1	1	3	NA
JI0099	4	absent	0|0	4	4	3	NA
JI0109	4	absent	0|0	4	4	3	2
JI0087	4	absent	0|0	1	1	3	NA
JI1980	4	absent	0|0	4	4	3	2
JI0214	4	absent	0|0	1	1	3	2
JI3006	4	absent	0|0	4	4	3	NA
JI0123	4	absent	0|0	1	1	3	2
JI0252	4	absent	0|0	1	1	1	2
JI1121	4	absent	0|0	1	1	1	NA
JI2345	4	absent	0|0	1	1	1	1
JI0085	4	absent	0|0	1	1	3	2
JI1539	4	absent	0|0	1	1	3	NA
JI0251	4	absent	0|0	1	1	1	NA
JI2349	4	absent	0|0	1	1	NA	1
JI0039	4	absent	0|0	4	4	NA	NA
JI1261	4	absent	0|0	1	1	NA	NA
JI0181	4	absent	0|0	1	1	3	2
JI0084	4	absent	0|0	1	1	3	2
JI3162	4	absent	0|0	1	1	3	NA
JI1444	4	absent	0|0	4	4	3	2
JI2548	4	absent	0|0	4	4	1	1
JI1956	4	absent	0|0	4	4	3	2
JI1854	4	absent	0|0	4	4	3	NA
JI3147	4	absent	./.	NA	NA	NA	NA
JI0261	4	absent	0|0	1	1	NA	NA
JI2698	4	absent	0|0	1	1	NA	NA
JI2055	4	absent	0|0	1	1	3	NA
JI0249	4	absent	0|0	1	1	NA	NA
JI1091	4	absent	0|0	1	1	NA	1
JI1094	4	absent	0|0	1	1	3	NA
JI1093	4	absent	0|0	1	1	NA	NA
JI3553	4	absent	0|0	1	1	NA	NA
JI1092	4	absent	0|0	1	1	NA	NA
JI3558	4	absent	0|0	1	1	NA	NA
JI1095	4	absent	0|0	1	1	NA	NA
JI3155	4	absent	0|0	1	1	3	2
JI1074	4	absent	0|0	1	1	NA	NA
JI2724	4	absent	0|0	1	1	NA	NA
JI0262	4	absent	0|0	1	1	1	NA
JI3263	4	absent	0|0	NA	NA	NA	1
JI0064	4	absent	0|0	1	1	3	NA
JI1795	4	absent	0|0	1	1	3	NA
JI3159	4	absent	0|0	1	1	NA	NA
JI3158	4	absent	0|0	1	1	1	NA
JI1075	4	absent	0|0	1	1	NA	NA
JI3276	4	absent	0|0	NA	NA	NA	NA
JI1794	4	absent	0|0	1	1	NA	NA
JI2538	4	absent	./.	NA	NA	NA	NA
JI3157	4	absent	0|0	1	1	3	NA
JI3156	4	absent	0|0	1	1	3	NA
JI2611	4	absent	0|0	4	4	3	2
JI1035	4	absent	0|0	1	1	NA	NA
JI0846	4	absent	0|0	4	4	3	NA
JI3153	4	absent	0|0	1	1	1	1
JI1804	4	absent	0|0	1	1	1	1
JI1796	4	absent	0|0	1	1	1	NA
JI1010	4	absent	0|0	1	1	NA	NA
JI2544	4	absent	0|0	1	1	NA	NA
JI2517	4	absent	0|0	1	1	1	1
JI2530	4	absent	0|0	1	1	NA	1
JI2473	4	absent	0|0	1	1	NA	NA
JI0224	4	absent	0|0	1	1	NA	NA
JI0255	4	absent	0|0	4	4	3	2
JI0002	4	absent	0|0	4	4	3	2
JI2202	4	absent	0|0	1	1	3	NA
JI2385	4	absent	0|0	4	4	3	2
JI3557	4	absent	0|0	NA	NA	NA	NA
JI1096	4	absent	0|0	1	1	3	NA
JI3274	4	absent	0|0	NA	NA	NA	2
JI3273	4	absent	0|0	NA	NA	NA	NA
JI3149	4	absent	0|0	1	1	NA	NA
JI3275	4	absent	0|0	NA	NA	NA	NA
JI2523	4	absent	0|0	1	1	NA	NA
JI2206	4	absent	0|0	1	1	1	NA
JI2519	4	absent	0|0	1	1	NA	NA
JI1006	4	absent	0|0	1	1	NA	1
JI0120	4	absent	0|0	1	1	3	2
JI3049	4	absent	0|0	1	1	3	2
JI3025	4	absent	0|0	4	4	3	2
JI0752	4	absent	0|0	1	1	1	NA
JI0094	4	absent	0|0	4	4	3	NA
JI3098	4	absent	0|0	1	1	3	1
JI2074	4	absent	0|0	1	1	3	NA
JI0209	4	absent	0|0	4	4	3	NA
JI0199	4	absent	0|0	1	1	3	NA
JI0198	4	absent	0|0	1	1	3	NA
JI0714	4	absent	0|0	1	1	1	1
JI3271	4	absent	0|0	NA	NA	NA	2
JI1270	4	absent	0|0	1	1	3	NA
JI1269	4	absent	0|0	4	4	1	2
JI1268	4	absent	0|0	4	4	NA	2
JI0223	4	absent	0|0	1	1	NA	NA
JI1848	4	absent	0|0	4	4	3	2
JI0185	4	absent	0|0	4	4	3	NA
JI0184	4	absent	0|0	4	4	1	NA
JI0189	4	absent	0|0	4	4	3	2
JI2603	4	absent	0|0	4	4	1	2
JI0328	4	absent	0|0	4	4	NA	2
JI0157	4	absent	0|0	4	4	3	2
JI0250	4	absent	0|0	4	4	3	2
JI0190	4	absent	0|0	4	4	3	NA
JI0080	4	absent	0|0	1	1	3	2
JI0035	5	absent	0|0	1	1	NA	NA
JI0066	5	absent	0|0	1	1	NA	2
JI0067	5	absent	0|0	4	4	3	2
JI0069	5	absent	0|0	1	1	NA	NA
JI0079	5	absent	0|0	4	4	3	2
JI0089	5	absent	0|0	1	1	3	2
JI0145	5	absent	0|0	1	1	NA	1
JI0151	5	absent	0|0	4	4	NA	2
JI0166	5	absent	0|0	4	4	NA	2
JI0172	5	absent	0|0	4	4	NA	2
JI0174	5	absent	0|0	2	2	3	NA
JI0188	5	absent	0|0	4	4	NA	2
JI0191	5	absent	0|0	4	4	3	NA
JI0228	5	absent	0|0	1	1	3	2
JI0237	5	absent	0|0	4	4	3	2
JI0240	5	absent	0|0	2	2	3	2
JI0288	5	absent	0|0	1	1	3	NA
JI0301	5	absent	0|0	2	2	NA	2
JI0305	5	absent	0|0	3	3	NA	NA
JI0329	5	absent	0|0	4	4	NA	2
JI0356	5	absent	0|0	1	1	1	1
JI0399	5	absent	0|0	5	5	NA	NA
JI0411	5	absent	0|0	1	1	1	1
JI0467	5	absent	0|0	4	4	3	2
JI0531	5	absent	0|0	3	3	2	2
JI0558	5	absent	0|0	4	4	3	1
JI0560	5	absent	0|0	4	4	3	1
JI0574	5	absent	0|0	1	1	NA	1
JI0651	5	absent	0|0	3	3	NA	2
JI0701	5	absent	0|0	4	4	3	2
JI0837	5	absent	0|0	2	2	NA	2
JI0968	5	absent	0|0	1	1	1	1
JI1041	5	absent	0|0	2	2	3	2
JI1078	5	absent	0|0	4	4	3	2
JI1084	5	absent	0|0	4	4	3	2
JI1147	5	absent	0|0	1	1	3	2
JI1245	5	absent	0|0	4	4	NA	2
JI1260	5	absent	0|0	4	4	3	2
JI1263	5	absent	0|0	4	4	NA	2
JI1265	5	absent	0|0	1	1	NA	2
JI1366	5	absent	0|0	1	1	3	1
JI1395	5	absent	0|0	4	4	NA	2
JI1407	5	absent	0|0	1	1	3	1
JI1434	5	absent	0|0	4	4	3	2
JI1453	5	absent	0|0	4	4	3	2
JI1464	5	absent	0|0	1	1	1	NA
JI1469	5	absent	0|0	4	4	3	NA
JI1529	5	absent	0|0	1	1	3	NA
JI1581	5	absent	0|0	1	1	3	1
JI1585	5	absent	0|0	4	4	3	2
JI1588	5	absent	0|0	1	1	NA	1
JI1590	5	absent	0|0	2	2	3	2
JI1636	5	absent	0|0	4	4	3	2
JI1639	5	absent	0|0	4	4	NA	NA
JI1663	5	absent	0|0	4	4	3	NA
JI1707	5	absent	0|0	NA	NA	NA	2
JI1724	5	absent	0|0	1	1	3	2
JI1885	5	absent	0|0	4	4	3	2
JI1919	5	absent	0|0	4	4	3	NA
JI1946	5	absent	0|0	4	4	NA	2
JI1947	5	absent	0|0	4	4	NA	2
JI1948	5	absent	0|0	4	4	3	2
JI1962	5	absent	0|0	4	4	1	1
JI1967	5	absent	0|0	1	1	3	2
JI1971	5	absent	0|0	4	4	3	2
JI1981	5	absent	0|0	1	1	1	1
JI1985	5	absent	0|0	1	1	NA	1
JI2100	5	absent	0|0	1	1	NA	NA
JI2104	5	absent	0|0	4	4	3	2
JI2106	5	absent	0|0	4	4	3	2
JI2126	5	absent	0|0	1	1	1	NA
JI2177	5	absent	0|0	4	4	3	2
JI2240	5	absent	0|0	1	1	3	1
JI2257	5	absent	0|0	1	1	3	2
JI2294	5	absent	0|0	4	4	2	2
JI2301	5	absent	0|0	1	1	3	NA
JI2389	5	absent	0|0	1	1	NA	NA
JI2644	5	absent	0|0	4	4	3	2
JI2683	5	absent	0|0	1	1	NA	1
JI3119	5	absent	0|0	2	2	3	NA
JI1991	5	absent	0|0	1	1	3	1
JI0884	5	absent	0|0	2	2	NA	2
JI1921	5	absent	0|0	4	4	NA	NA
JI1822	5	absent	0|0	1	1	NA	2
JI0022	6	present	1|1	6	6	NA	2
JI0033	6	present	1|1	6	6	NA	NA
JI0037	6	present	1|1	5	5	2	2
JI0043	6	present	1|1	5	5	NA	2
JI0046	6	present	1|1	5	5	NA	2
JI0061	6	present	1|1	5	5	NA	2
JI0072	6	present	1|1	6	6	NA	2
JI0073	6	present	1|1	5	5	NA	NA
JI0074	6	present	1|1	5	5	3	2
JI0077	6	present	1|1	6	6	2	2
JI0082	6	present	1|1	6	6	NA	2
JI0114	6	present	1|1	6	6	2	2
JI0122	6	present	1|1	5	5	NA	NA
JI0127	6	present	1|1	NA	4	2	NA
JI0131	6	present	1|1	5	5	2	2
JI0134	6	present	1|1	5	5	2	2
JI0136	6	present	1|1	5	5	2	NA
JI0144	6	present	1|1	6	6	2	NA
JI0298	6	present	1|1	NA	NA	3	NA
JI0303	6	present	1|1	6	6	3	2
JI0304	6	present	1|1	6	6	NA	2
JI0314	6	present	1|1	NA	NA	3	2
JI0318	6	present	1|1	5	5	NA	NA
JI0319	6	present	1|1	6	6	NA	2
JI0327	6	present	1|1	6	6	3	2
JI0361	6	present	1|1	6	6	3	2
JI0383	6	present	1|1	6	6	NA	2
JI0389	6	present	1|1	6	6	3	2
JI0400	6	present	1|1	6	6	2	2
JI0402	6	present	1|1	6	6	2	2
JI0406	6	present	1|1	6	6	2	2
JI0417	6	present	1|1	6	6	2	2
JI0420	6	present	1|1	5	5	2	2
JI0428	6	present	1|1	6	6	2	2
JI0430	6	present	1|1	6	6	2	2
JI0434	6	present	1|1	NA	NA	NA	2
JI0441	6	present	1|1	6	6	2	2
JI0460	6	present	1|1	NA	2	2	2
JI0474	6	present	1|1	5	5	2	2
JI0491	6	present	1|1	5	5	2	2
JI0496	6	present	1|1	6	6	2	2
JI0498	6	present	1|1	6	6	2	2
JI0504	6	present	1|1	6	6	NA	2
JI0506	6	present	1|1	6	6	2	2
JI0536	6	present	1|1	5	5	2	2
JI0539	6	present	1|1	6	6	2	2
JI0546	6	present	1|1	5	5	3	2
JI0550	6	present	1|1	5	5	2	2
JI0554	6	present	1|1	5	5	2	2
JI0568	6	present	1|1	6	6	2	2
JI0571	6	present	1|1	6	6	NA	2
JI0573	6	present	1|1	6	6	NA	2
JI0582	6	present	1|1	5	5	2	2
JI0584	6	present	1|1	5	5	2	2
JI0607	6	present	1|1	6	6	2	2
JI0614	6	present	1|1	NA	2	NA	2
JI0653	6	present	1|1	6	6	2	2
JI0662	6	present	1|1	6	6	NA	2
JI0665	6	present	1|1	5	5	NA	2
JI0670	6	present	1|1	5	5	NA	2
JI0720	6	present	1|1	6	6	NA	2
JI0721	6	present	1|1	5	5	NA	2
JI0727	6	present	1|1	6	6	2	2
JI0737	6	present	1|1	6	6	NA	2
JI0738	6	present	1|1	5	5	NA	2
JI0745	6	present	1|1	5	5	2	2
JI0746	6	present	1|1	6	6	NA	2
JI0774	6	present	1|1	6	6	2	2
JI0780	6	present	1|1	6	6	2	NA
JI0790	6	present	1|1	6	6	NA	2
JI0799	6	present	1|1	6	6	2	2
JI0804	6	present	1|1	5	5	3	2
JI0806	6	present	1|1	6	6	2	NA
JI0814	6	present	1|1	6	6	2	2
JI0815	6	present	1|1	6	6	NA	2
JI0819	6	present	1|1	NA	1	3	NA
JI0829	6	present	1|1	6	6	NA	2
JI0832	6	present	1|1	6	6	NA	2
JI0841	6	present	1|1	NA	2	NA	2
JI0844	6	present	1|1	NA	2	NA	NA
JI0853	6	present	1|1	6	6	2	2
JI0907	6	present	1|1	6	6	NA	2
JI0909	6	present	1|1	NA	2	3	2
JI0935	6	present	1|1	6	6	NA	2
JI0991	6	present	1|1	6	6	2	NA
JI1017	6	present	1|1	6	6	2	2
JI1018	6	present	1|1	5	5	NA	NA
JI1128	6	present	1|1	5	5	NA	2
JI1165	6	present	1|1	NA	2	3	2
JI1179	6	present	1|1	6	6	NA	NA
JI1194	6	present	1|1	5	5	NA	2
JI1200	6	present	1|1	6	6	2	2
JI1201	6	present	1|1	5	5	NA	2
JI1205	6	present	1|1	5	5	2	2
JI1210	6	present	1|1	NA	NA	2	2
JI1214	6	present	1|1	6	6	NA	2
JI1227	6	present	1|1	5	5	2	NA
JI1229	6	present	1|1	6	6	2	2
JI1231	6	present	1|1	5	5	2	2
JI1237	6	present	1|1	5	5	NA	NA
JI1277	6	present	1|1	6	6	NA	2
JI1280	6	present	1|1	6	6	NA	NA
JI1282	6	present	1|1	6	6	NA	2
JI1294	6	present	1|1	6	6	2	2
JI1303	6	present	1|1	6	6	2	2
JI1313	6	present	1|1	6	6	2	2
JI1423	6	present	1|1	5	5	2	2
JI1562	6	present	1|1	5	5	NA	NA
JI1569	6	present	1|1	5	5	NA	2
JI1720	6	present	1|1	5	5	2	2
JI1721	6	present	1|1	5	5	2	2
JI1732	6	present	1|1	6	6	2	2
JI1733	6	present	1|1	6	6	2	2
JI1737	6	present	1|1	6	6	3	2
JI1747	6	present	1|1	NA	NA	2	2
JI1748	6	present	1|1	5	5	2	2
JI1762	6	present	1|1	5	5	2	2
JI1772	6	present	1|1	5	5	NA	2
JI1829	6	present	1|1	6	6	2	2
JI2016	6	present	1|1	5	5	2	2
JI2017	6	present	1|1	6	6	2	2
JI2081	6	present	1|1	6	6	NA	NA
JI2083	6	present	1|1	5	5	3	NA
JI2108	6	present	1|1	6	6	2	2
JI2217	6	present	1|1	6	6	2	2
JI2219	6	present	1|1	6	6	NA	2
JI2221	6	present	1|1	6	6	2	2
JI2262	6	present	1|1	5	5	NA	2
JI2317	6	present	1|1	6	6	NA	2
JI2374	6	present	1|1	6	6	2	2
JI2393	6	present	1|1	6	6	NA	NA
JI2394	6	present	1|1	6	6	2	2
JI2401	6	present	1|1	6	6	NA	2
JI2402	6	present	1|1	6	6	NA	2
JI2403	6	present	1|1	6	6	2	2
JI2410	6	present	1|1	6	6	2	2
JI2434	6	present	1|1	5	5	2	2
JI2464	6	present	1|1	5	5	NA	2
JI2500	6	present	1|1	6	6	NA	2
JI2501	6	present	1|1	6	6	NA	2
JI2595	6	present	1|1	6	6	2	2
JI2699	6	present	1|1	6	6	2	2
JI2711	6	present	1|1	6	6	2	NA
JI2782	6	present	1|1	6	6	2	2
JI2787	6	present	1|1	6	6	2	2
JI3027	6	present	1|1	6	6	2	2
JI3029	6	present	1|1	6	6	2	2
JI0330	6	present	1|1	6	6	2	2
JI0335	6	present	1|1	6	6	NA	2
JI0870	6	present	1|1	5	5	NA	2
JI0874	6	present	1|1	NA	2	NA	2
JI0877	6	present	1|1	6	6	2	2
JI2371	6	present	1|1	NA	NA	NA	2
JI2757	6	present	0|1	NA	4	3	2
JI0808	6	present	1|1	NA	3	3	2
JI0026	7	absent	0|0	1	1	NA	2
JI0019	7	absent	0|0	1	1	3	2
JI0210	7	absent	0|0	3	3	NA	1
JI0257	7	absent	0|0	4	4	3	2
JI0341	7	absent	0|0	3	3	1	NA
JI0344	7	absent	0|0	3	3	3	NA
JI0362	7	absent	0|0	4	4	NA	NA
JI0369	7	absent	0|0	1	1	NA	1
JI0718	7	absent	0|0	2	2	1	2
JI0757	7	absent	0|0	4	4	NA	2
JI0930	7	absent	0|0	1	1	1	NA
JI0958	7	absent	0|0	1	1	NA	NA
JI1272	7	absent	0|0	NA	NA	3	NA
JI1555	7	absent	0|0	4	4	3	1
JI1575	7	absent	0|0	1	1	NA	NA
JI1774	7	absent	0|0	1	1	3	1
JI1791	7	absent	0|0	1	1	1	1
JI1922	7	absent	0|0	1	1	1	1
JI2007	7	absent	0|0	1	1	3	2
JI2160	7	absent	0|0	4	4	NA	NA
JI3120	7	absent	0|0	4	4	NA	NA

## Sheet: Table S13, Ii
Supplementary Table 13. Green vs. Yellow cotyledons with the SGR gene haplotypes. Phenotypic characteristics and allelic variations with the presence of the Ty1-copia insertion is given.
Accessions	Phenotype for GWAS (1=yellow; 2=green;3=orange)	CotCol_JIC_2024 (1=yellow; 2=green;3=green to bleaching;4= both green and yellow in population)	Ty1-copia element	Haplotype ID assigned manually	Allele ID
Baryton/JI3638	3	1	absent	8	I
JI0066	1	1	absent	8	I
JI2262	1	1	absent	8	I
JI0692	1	1	absent	8	I
JI0971	1	1	absent	8	I
JI1071	1	1	absent	8	I
JI1768	1	1	absent	8	I
JI0074	1	1	absent	8	I
JI0358	1	1	absent	8	I
JI0815	1	1	absent	8	I
JI1817	1	1	absent	8	I
JI1848	1	1	absent	8	I
JI2100	1	1	absent	8	I
JI2583	1	1	absent	8	I
JI0046	1	1	absent	8	I
JI0062	1	1	absent	8	I
JI0069	1	1	absent	8	I
JI1084	1	1	absent	8	I
JI1804	1	1	absent	8	I
JI2296	1	1	absent	8	I
JI0819	1	1	absent	8	I
JI1125	1	1	absent	8	I
JI3022	1	1	absent	8	I
JI0208	1	1	absent	8	I
JI0223	1	1	absent	8	I
JI0635	1	1	absent	8	I
JI0699	1	1	absent	8	I
JI0782	1	1	absent	8	I
JI1307	1	1	absent	8	I
JI1793	1	1	absent	8	I
JI1981	1	1	absent	8	I
JI2683	1	1	absent	8	I
JI0025	1	1	absent	8	I
JI0344	1	1	absent	8	I
JI3096	1	1	absent	8	I
JI0022	1	1	absent	8	I
JI0067	1	1	absent	8	I
JI1538	1	1	absent	8	I
JI2277	1	1	absent	8	I
JI2648	1	1	absent	8	I
JI3186	1	1	absent	8	I
JI0151	1	1	absent	8	I
JI0558	1	1	absent	8	I
JI0949	1	1	absent	8	I
JI1132	1	1	absent	8	I
JI1227	1	1	absent	8	I
JI3080	1	1	absent	8	I
JI0288	1	1	absent	8	I
JI1128	2	3	absent	8	I
JI0247	1	1	absent	8	I
JI0466	1	1	absent	8	I
JI0825	1	1	absent	8	I
JI2559	1	1	absent	8	I
JI2695	1	1	absent	8	I
JI0149	1	1	absent	8	I
JI0275	1	1	absent	8	I
JI0380	1	1	absent	8	I
JI0356	1	1	absent	8	I
JI0369	1	1	absent	8	I
JI1345	1	1	absent	8	I
JI0228	1	1	absent	8	I
JI1851	1	1	absent	8	I
JI2217	1	1	absent	8	I
JI0341	1	1	absent	8	I
JI3271	1	1	absent	8	I
FN1453/JI3635	2	2	present	9	i-1
FN2026_7/JI3636	2	2	present	9	i-1
FN2076_5/JI3637	2	2	present	9	i-1
JI0037	2	1	present	9	i-1
JI0061	2	1	present	9	i-1
JI0428	2	4	present	9	i-1
JI0720	2	3	present	9	i-1
JI0746	2	4	present	9	i-1
JI0774	2	3	present	9	i-1
JI0048	NA	2	present	9	i-1
JI0799	2	4	present	9	i-1
JI0804	2	4	present	9	i-1
JI0829	2	1	present	9	i-1
JI0991	2	4	present	9	i-1
JI1201	2	2	present	9	i-1
JI1720	2	1	present	9	i-1
JI1733	2	3	present	9	i-1
JI1816	2	3	present	9	i-1
JI2106	2	2	present	9	i-1
JI2410	2	4	present	9	i-1
JI2693	2	2	present	9	i-1
JI2782	2	1	present	9	i-1
JI2822	2	2	present	9	i-1
JI3049	2	2	present	9	i-1
JI0298	NA	3	present	9	i-1
JI0389	2	3	present	9	i-1
JI0434	NA	4	present	9	i-1
JI0506	2	3	present	9	i-1
JI0607	NA	2	present	9	i-1
JI0935	NA	2	present	9	i-1
JI1219	NA	2	present	9	i-1
JI1272	NA	2	present	9	i-1
JI0015	2	2	present	9	i-1
JI0035	2	2	present	9	i-1
JI0058	2	2	present	9	i-1
JI0077	2	3	present	9	i-1
JI0090	2	2	present	9	i-1
JI0122	2	2	present	9	i-1
JI0128	2	2	present	9	i-1
JI0134	2	2	present	9	i-1
JI0145	2	2	present	9	i-1
JI0301	2	2	present	9	i-1
JI0304	2	3	present	9	i-1
JI0319	2	3	present	9	i-1
JI0323	2	2	present	9	i-1
JI0327	2	2	present	9	i-1
JI0330	2	3	present	9	i-1
JI0342	2	3	present	9	i-1
JI0354	2	2	present	9	i-1
JI0399	2	2	present	9	i-1
JI0400	2	3	present	9	i-1
JI0402	2	2	present	9	i-1
JI0409	2	3	present	9	i-1
JI0423	2	2	present	9	i-1
JI0424	2	2	present	9	i-1
JI0430	2	2	present	9	i-1
JI0516	2	3	present	9	i-1
JI0531	2	2	present	9	i-1
JI0582	2	2	present	9	i-1
JI0584	2	2	present	9	i-1
JI0681	2	2	present	9	i-1
JI0757	2	2	present	9	i-1
JI0781	2	2	present	9	i-1
JI0817	2	2	present	9	i-1
JI0841	2	1	present	9	i-1
JI0907	2	2	present	9	i-1
JI0957	2	2	present	9	i-1
JI1014	2	3	present	9	i-1
JI1147	2	2	present	9	i-1
JI1165	2	3	present	9	i-1
JI1212	2	2	present	9	i-1
JI1214	2	3	present	9	i-1
JI1217	2	2	present	9	i-1
JI1231	2	3	present	9	i-1
JI1246	2	2	present	9	i-1
JI1280	2	2	present	9	i-1
JI1282	2	1	present	9	i-1
JI1313	2	3	present	9	i-1
JI1407	2	2	present	9	i-1
JI1423	2	3	present	9	i-1
JI1577	2	2	present	9	i-1
JI1724	2	2	present	9	i-1
JI1747	2	2	present	9	i-1
JI1772	2	2	present	9	i-1
JI1774	2	2	present	9	i-1
JI1775	2	2	present	9	i-1
JI1791	2	2	present	9	i-1
JI1822	2	3	present	9	i-1
JI1865	2	2	present	9	i-1
JI2007	2	2	present	9	i-1
JI2016	2	2	present	9	i-1
JI2017	2	3	present	9	i-1
JI2036	2	2	present	9	i-1
JI2108	2	2	present	9	i-1
JI2110	2	2	present	9	i-1
JI2114	2	2	present	9	i-1
JI2193	2	2	present	9	i-1
JI2219	2	2	present	9	i-1
JI2221	2	2	present	9	i-1
JI2240	2	2	present	9	i-1
JI2294	2	2	present	9	i-1
JI2314	2	2	present	9	i-1
JI2317	2	3	present	9	i-1
JI2321	2	2	present	9	i-1
JI2329	2	2	present	9	i-1
JI2374	2	2	present	9	i-1
JI2389	2	2	present	9	i-1
JI2393	2	2	present	9	i-1
JI2394	2	2	present	9	i-1
JI2401	2	2	present	9	i-1
JI2403	2	2	present	9	i-1
JI2501	2	2	present	9	i-1
JI2623	2	4	present	9	i-1
JI2711	2	2	present	9	i-1
JI2371	NA	2	present	9	i-1
JI3025	2	2	present	9	i-1
JI3027	2	3	present	9	i-1
JI3029	2	3	present	9	i-1
JI0057	2	2	present	9	i-1
JI0082	2	4	present	9	i-1
JI0144	2	3	present	9	i-1
JI0305	2	2	present	9	i-1
JI0318	2	3	present	9	i-1
JI0361	2	3	present	9	i-1
JI0383	2	2	present	9	i-1
JI0406	2	3	present	9	i-1
JI0420	2	3	present	9	i-1
JI0441	2	2	present	9	i-1
JI0460	2	4	present	9	i-1
JI0474	2	2	present	9	i-1
JI0491	2	3	present	9	i-1
JI0496	2	2	present	9	i-1
JI0498	2	2	present	9	i-1
JI0536	2	2	present	9	i-1
JI0539	2	2	present	9	i-1
JI0546	2	2	present	9	i-1
JI0550	2	2	present	9	i-1
JI0566	2	3	present	9	i-1
JI0568	2	3	present	9	i-1
JI0571	2	2	present	9	i-1
JI0573	2	3	present	9	i-1
JI0614	2	3	present	9	i-1
JI0653	2	2	present	9	i-1
JI0662	2	2	present	9	i-1
JI0665	2	3	present	9	i-1
JI0721	2	3	present	9	i-1
JI0727	2	3	present	9	i-1
JI0737	2	4	present	9	i-1
JI0738	2	2	present	9	i-1
JI0745	2	2	present	9	i-1
JI0780	2	3	present	9	i-1
JI0790	2	2	present	9	i-1
JI0814	2	3	present	9	i-1
JI0837	2	2	present	9	i-1
JI0844	2	2	present	9	i-1
JI0853	2	2	present	9	i-1
JI0859	2	2	present	9	i-1
JI0877	2	4	present	9	i-1
JI0884	2	4	present	9	i-1
JI1017	2	2	present	9	i-1
JI1018	2	2	present	9	i-1
JI1187	2	2	present	9	i-1
JI1194	2	3	present	9	i-1
JI1200	2	3	present	9	i-1
JI1205	2	3	present	9	i-1
JI1237	2	3	present	9	i-1
JI1277	2	2	present	9	i-1
JI1303	2	2	present	9	i-1
JI1562	2	3	present	9	i-1
JI1569	2	3	present	9	i-1
JI1721	2	1	present	9	i-1
JI1732	2	2	present	9	i-1
JI1748	2	2	present	9	i-1
JI1800	2	2	present	9	i-1
JI2434	2	3	present	9	i-1
JI2464	2	3	present	9	i-1
JI2787	2	3	present	9	i-1
JI3604	2	2	present	9	i-1
JI3605	2	3	present	9	i-1
JI3609	2	2	present	9	i-1
JI3611	2	3	present	9	i-1
JI3614	2	2	present	9	i-1
Samson/JI3639	2	1	present	9	i-1
JI0177	1	1	absent	6	I
JI0893	1	1	absent	6	I
JI3178	3	1	absent	6	I
JI0874	1	1	absent	6	I
JI1575	1	1	absent	6	I
JI2233	1	1	absent	6	I
JI2699	1	1	absent	6	I
JI0114	1	1	absent	6	I
JI0136	1	1	absent	6	I
JI0162	1	1	absent	6	I
JI0172	1	1	absent	6	I
JI0270	1	1	absent	6	I
JI0303	1	1	absent	6	I
JI0335	1	1	absent	6	I
JI0364	1	1	absent	6	I
JI0670	1	1	absent	6	I
JI1129	1	1	absent	6	I
JI1222	1	1	absent	6	I
JI1625	1	1	absent	6	I
JI1911	1	1	absent	6	I
JI1933	1	1	absent	6	I
JI2223	1	1	absent	6	I
JI0180	1	1	absent	6	I
JI1706	1	1	absent	6	I
JI1921	1	1	absent	6	I
JI2153	1	1	absent	6	I
JI0072	1	1	absent	6	I
JI0314	NA	1	absent	6	I
JI0216	1	1	absent	6	I
JI0504	1	1	absent	6	I
JI0554	1	1	absent	6	I
JI0651	1	1	absent	6	I
JI0854	1	1	absent	6	I
JI0930	1	1	absent	6	I
JI1245	1	1	absent	6	I
JI1762	1	1	absent	6	I
JI1920	1	1	absent	6	I
JI1968	2	1	absent	6	I
JI0340	1	1	absent	6	I
JI0417	1	1	absent	6	I
JI1590	1	1	absent	6	I
JI1919	1	1	absent	6	I
JI2116	1	1	absent	6	I
JI2156	1	1	absent	6	I
JI2228	1	1	absent	6	I
JI2274	1	1	absent	6	I
JI0965	1	1	absent	6	I
JI1922	1	1	absent	6	I
JI2134	1	1	absent	6	I
JI2182	1	1	absent	6	I
JI3119	1	1	absent	6	I
JI3179	3	1	absent	6	I
JI0892	1	1	absent	6	I
JI2174	1	1	absent	6	I
JI0257	1	1	absent	6	I
JI0329	1	1	absent	6	I
JI1058	1	1	absent	6	I
JI1915	1	1	absent	6	I
JI2324	3	1	absent	6	I
JI0467	1	1	absent	6	I
JI0832	1	1	absent	6	I
JI1085	1	1	absent	6	I
JI2115	1	1	absent	6	I
JI0210	1	1	absent	6	I
JI1229	1	1	absent	6	I
JI1555	1	1	absent	6	I
JI1492	1	1	absent	6	I
JI1707	NA	1	absent	6	I
JI0127	2	2	absent	6	I
JI2500	2	3	absent	6	I
JI0084	2	4	absent	6	I
JI2402	2	3	absent	6	I
JI0574	2	2	absent	6	I
JI0411	2	2	absent	6	I
JI0560	2	2	absent	6	I
JI1294	2	2	absent	6	I
JI0870	2	3	absent	6	I
JI1829	2	1	absent	6	I
JI2671	3	1	absent	6	I
JI0028	1	1	absent	4	I
JI0089	1	1	absent	4	I
JI0167	1	1	absent	4	I
JI0188	1	1	absent	4	I
JI0198	1	1	absent	4	I
JI0220	1	1	absent	4	I
JI0221	1	1	absent	4	I
JI0222	1	1	absent	4	I
JI0237	1	1	absent	4	I
JI0240	1	1	absent	4	I
JI0362	1	1	absent	4	I
JI0616	1	1	absent	4	I
JI0863	1	1	absent	4	I
JI0950	1	1	absent	4	I
JI0955	1	1	absent	4	I
JI0968	1	1	absent	4	I
JI1041	1	1	absent	4	I
JI1260	1	1	absent	4	I
JI1263	1	1	absent	4	I
JI1266	1	1	absent	4	I
JI1268	1	1	absent	4	I
JI1366	1	1	absent	4	I
JI1395	1	1	absent	4	I
JI1434	1	1	absent	4	I
JI1453	1	1	absent	4	I
JI1462	1	1	absent	4	I
JI1464	1	1	absent	4	I
JI1469	1	1	absent	4	I
JI1503	1	1	absent	4	I
JI1523	1	1	absent	4	I
JI1529	1	1	absent	4	I
JI1535	2	1	absent	4	I
JI1581	1	1	absent	4	I
JI1585	1	1	absent	4	I
JI1587	1	1	absent	4	I
JI1588	1	1	absent	4	I
JI1592	1	1	absent	4	I
JI1607	1	1	absent	4	I
JI1639	1	1	absent	4	I
JI1652	1	1	absent	4	I
JI1663	1	1	absent	4	I
JI1669	1	1	absent	4	I
JI1792	1	1	absent	4	I
JI1834	1	1	absent	4	I
JI1947	1	1	absent	4	I
JI1948	1	1	absent	4	I
JI1962	1	1	absent	4	I
JI1967	1	1	absent	4	I
JI1971	1	1	absent	4	I
JI1985	1	1	absent	4	I
JI1989	1	1	absent	4	I
JI1991	1	1	absent	4	I
JI2001	1	1	absent	4	I
JI2074	1	1	absent	4	I
JI2081	2	1	absent	4	I
JI2105	1	1	absent	4	I
JI2126	1	1	absent	4	I
JI2129	1	1	absent	4	I
JI2150	1	1	absent	4	I
JI2152	1	1	absent	4	I
JI2154	1	1	absent	4	I
JI2157	1	1	absent	4	I
JI2300	1	1	absent	4	I
JI2301	1	1	absent	4	I
JI2349	3	1	absent	4	I
JI2353	1	1	absent	4	I
JI2355	1	1	absent	4	I
JI2743	1	1	absent	4	I
JI3148	1	1	absent	4	I
JI3157	1	1	absent	4	I
JI2149	1	1	absent	4	I
JI0007	1	1	absent	1	I
JI0014	1	1	absent	1	I
JI0018	1	1	absent	1	I
JI0020	1	1	absent	1	I
JI0021	1	1	absent	1	I
JI0024	1	1	absent	1	I
JI0043	1	1	absent	1	I
JI0055	1	1	absent	1	I
JI0120	1	1	absent	1	I
JI0124	1	1	absent	1	I
JI0125	1	1	absent	1	I
JI0150	1	1	absent	1	I
JI0152	3	1	absent	1	I
JI0175	1	1	absent	1	I
JI0176	1	1	absent	1	I
JI0245	1	1	absent	1	I
JI0371	1	1	absent	1	I
JI0800	1	1	absent	1	I
JI0952	1	1	absent	1	I
JI1055	1	1	absent	1	I
JI1444	1	1	absent	1	I
JI1524	1	1	absent	1	I
JI1059	NA	1	absent	1	I
JI1702	1	1	absent	1	I
JI1703	1	1	absent	1	I
JI1850	1	1	absent	1	I
JI1863	1	1	absent	1	I
JI1870	1	1	absent	1	I
JI1885	1	1	absent	1	I
JI2058	1	1	absent	1	I
JI2084	1	1	absent	1	I
JI2273	1	1	absent	1	I
JI2312	1	1	absent	1	I
JI2332	3	1	absent	1	I
JI1704	NA	1	absent	1	I
JI1713	NA	1	absent	1	I
JI2366	3	1	absent	1	I
JI2716	3	1	absent	1	I
JI3053	1	1	absent	1	I
JI0368	1	1	absent	1	I
JI0808	1	1	absent	1	I
JI0006	1	1	absent	1	I
JI0794	1	1	absent	1	I
JI1705	NA	1	absent	1	I
JI0012	1	1	absent	8	I
JI0034	1	1	absent	8	I
JI0050	1	1	absent	8	I
JI0060	1	1	absent	8	I
JI0146	1	1	absent	8	I
JI0154	1	1	absent	8	I
JI0174	1	1	absent	8	I
JI0209	1	1	absent	8	I
JI0233	1	1	absent	8	I
JI0246	1	1	absent	8	I
JI0339	1	1	absent	8	I
JI0657	1	1	absent	8	I
JI0695	1	1	absent	8	I
JI0701	1	1	absent	8	I
JI0714	1	1	absent	8	I
JI0717	1	1	absent	8	I
JI0813	1	1	absent	8	I
JI0974	1	1	absent	8	I
JI1043	1	1	absent	8	I
JI1082	1	1	absent	8	I
JI1224	1	1	absent	8	I
JI1386	1	1	absent	8	I
JI1626	1	1	absent	8	I
JI1636	1	1	absent	8	I
JI1714	1	1	absent	8	I
JI1722	1	1	absent	8	I
JI1737	1	1	absent	8	I
JI1891	1	1	absent	8	I
JI1894	1	1	absent	8	I
JI1946	1	1	absent	8	I
JI1996	1	1	absent	8	I
JI2104	1	1	absent	8	I
JI2436	1	1	absent	8	I
JI2644	1	1	absent	8	I
JI3086	1	1	absent	8	I
JI2595	1	1	absent	8	I
JI0085	1	1	absent	5	I
JI0087	1	1	absent	5	I
JI0098	1	1	absent	5	I
JI0099	1	1	absent	5	I
JI0102	1	1	absent	5	I
JI0108	1	1	absent	5	I
JI0241	1	1	absent	5	I
JI0251	1	1	absent	5	I
JI0252	1	1	absent	5	I
JI0276	2	1	absent	5	I
JI0716	1	1	absent	5	I
JI0754	1	1	absent	5	I
JI1398	1	1	absent	5	I
JI1491	1	1	absent	5	I
JI1539	1	1	absent	5	I
JI1542	1	1	absent	5	I
JI1578	1	1	absent	5	I
JI1698	1	1	absent	5	I
JI1854	1	1	absent	5	I
JI1956	2	1	absent	5	I
JI1980	1	1	absent	5	I
JI2018	1	1	absent	5	I
JI2344	1	1	absent	5	I
JI2345	1	1	absent	5	I
JI2348	1	1	absent	5	I
JI2350	1	1	absent	5	I
JI2429	1	1	absent	5	I
JI3006	1	1	absent	5	I
JI0044	1	1	absent	3	I
JI0123	1	1	absent	3	I
JI0133	1	1	absent	3	I
JI0138	1	1	absent	3	I
JI0205	1	1	absent	3	I
JI0391	1	1	absent	3	I
JI0703	1	1	absent	3	I
JI0712	1	1	absent	3	I
JI0735	1	1	absent	3	I
JI0787	2	1	absent	3	I
JI0806	1	1	absent	3	I
JI0820	1	1	absent	3	I
JI0846	1	1	absent	3	I
JI0932	1	1	absent	3	I
JI1002	1	1	absent	3	I
JI1573	1	1	absent	3	I
JI1210	NA	1	absent	3	I
JI1882	1	1	absent	3	I
JI2243	1	1	absent	3	I
JI2331	3	1	absent	3	I
JI2659	1	1	absent	3	I
JI2707	1	1	absent	3	I
JI2753	3	1	absent	3	I
JI2764	3	1	absent	3	I
JI3167	3	1	absent	3	I
JI1837	2	2	absent	3	I
JI3610	3	1	absent	3	I
JI0033	1	1	absent	8	I
JI0148	1	1	absent	8	I
JI0166	1	1	absent	8	I
JI0705	1	1	absent	8	I
JI1265	1	1	absent	8	I
JI1344	1	1	absent	8	I
JI1482	1	1	absent	8	I
JI1486	2	1	absent	8	I
JI1528	1	1	absent	8	I
JI1547	1	1	absent	8	I
JI1679	1	1	absent	8	I
JI1910	1	1	absent	8	I
JI1995	1	1	absent	8	I
JI2048	1	1	absent	8	I
JI2236	1	1	absent	8	I
JI2561	1	1	absent	8	I
JI3120	1	1	absent	8	I
JI2742	3	1	absent	8	I
JI0064	1	1	absent	7	I
JI0224	2	1	absent	7	I
JI0261	1	1	absent	7	I
JI0262	1	1	absent	7	I
JI1010	1	1	absent	7	I
JI1794	2	1	absent	7	I
JI1796	1	1	absent	7	I
JI2206	1	1	absent	7	I
JI2517	1	1	absent	7	I
JI2519	1	1	absent	7	I
JI2523	1	1	absent	7	I
JI2530	1	1	absent	7	I
JI2544	1	1	absent	7	I
JI3158	1	1	absent	7	I
JI3276	1	1	absent	7	I
JI1006	1	1	absent	7	I
JI2473	1	1	absent	7	I
JI3159	1	1	absent	7	I
JI0295	1	1	absent	1	I
JI0711	1	1	absent	1	I
JI0718	1	1	absent	1	I
JI0795	1	1	absent	1	I
JI0887	1	1	absent	1	I
JI0958	1	1	absent	1	I
JI1173	2	1	absent	1	I
JI1519	1	1	absent	1	I
JI1835	1	1	absent	1	I
JI1900	1	1	absent	1	I
JI2061	1	1	absent	1	I
JI2279	1	1	absent	1	I
JI2311	1	1	absent	1	I
JI2776	1	1	absent	1	I
JI3134	1	1	absent	1	I
JI2423	1	1	absent	1	I
JI0807	1	1	absent	1	I
JI0249	2	1	absent	7	I
JI1091	1	1	absent	7	I
JI1092	1	1	absent	7	I
JI1093	2	1	absent	7	I
JI1094	1	1	absent	7	I
JI1095	1	1	absent	7	I
JI1096	2	1	absent	7	I
JI1795	1	1	absent	7	I
JI2055	1	1	absent	7	I
JI3149	1	1	absent	7	I
JI3553	1	1	absent	7	I
JI3558	1	1	absent	7	I
JI3263	1	1	absent	7	I
JI3273	1	1	absent	7	I
JI3274	NA	1	absent	7	I
JI3275	2	1	absent	7	I
JI3557	1	1	absent	7	I
JI0071	1	1	absent	4	I
JI0157	1	1	absent	4	I
JI0189	1	1	absent	4	I
JI0191	1	1	absent	4	I
JI0250	1	1	absent	4	I
JI0267	2	1	absent	4	I
JI0268	1	1	absent	4	I
JI0328	1	1	absent	4	I
JI1086	1	1	absent	4	I
JI1088	1	1	absent	4	I
JI1089	1	1	absent	4	I
JI1543	1	1	absent	4	I
JI1699	1	1	absent	4	I
JI1846	1	1	absent	4	I
JI2603	1	1	absent	4	I
JI0184	1	1	absent	4	I
JI0019	2	1	absent	2	i-2
JI0190	2	2	absent	2	i-2
JI2160	2	2	absent	2	i-2
JI0026	2	2	absent	2	i-2
JI0040	2	2	absent	2	i-2
JI0131	2	2	absent	2	i-2
JI0185	2	2	absent	2	i-2
JI0322	2	3	absent	2	i-2
JI0693	2	2	absent	2	i-2
JI1718	2	2	absent	2	i-2
JI1735	2	2	absent	2	i-2
JI2083	2	2	absent	2	i-2
JI0073	2	2	absent	2	i-2
JI0118	2	2	absent	2	i-2
JI0909	2	3	absent	2	i-2
JI0002	1	1	absent	7	I
JI0047	1	1	absent	7	I
JI0255	1	1	absent	7	I
JI1074	1	1	absent	7	I
JI1228	NA	1	absent	7	I
JI2202	1	1	absent	7	I
JI2385	1	1	absent	7	I
JI2611	1	1	absent	7	I
JI2629	1	1	absent	7	I
JI2698	1	1	absent	7	I
JI2724	1	1	absent	7	I
JI3155	1	1	absent	7	I
JI2538	NA	1	absent	7	I
JI3147	NA	1	absent	7	I
JI0039	1	1	absent	5	I
JI0079	1	1	absent	5	I
JI0083	1	4	absent	5	I
JI0086	1	1	absent	5	I
JI0094	1	1	absent	5	I
JI0109	1	1	absent	5	I
JI0132	1	1	absent	5	I
JI0147	1	1	absent	5	I
JI0752	1	1	absent	5	I
JI1179	1	1	absent	5	I
JI1269	1	1	absent	5	I
JI1477	1	1	absent	5	I
JI2177	1	1	absent	5	I
JI0181	1	1	absent	5	I
JI1035	1	1	absent	5	I
JI1109	1	1	absent	5	I
JI1117	1	1	absent	5	I
JI1121	1	1	absent	5	I
JI1261	1	1	absent	5	I
JI1270	1	1	absent	5	I
JI3098	1	1	absent	5	I
JI2548	2	2	absent	5	I
JI2201	1	1	absent	7	I
JI3150	1	1	absent	7	I
JI3151	1	1	absent	7	I
JI3162	1	1	absent	7	I
JI3163	1	1	absent	7	I
JI3511	1	1	absent	7	I
JI0116	1	1	absent	3	I
JI0200	1	1	absent	3	I
JI0378	1	1	absent	3	I
JI0734	1	1	absent	3	I
JI2761	1	1	absent	3	I
JI3030	1	1	absent	3	I
JI0214	1	1	absent	4	I
JI1548	1	1	absent	4	I
JI2089	1	1	absent	4	I
JI2757	3	1	absent	4	I
JI0080	1	4	absent	4	I
JI1078	1	1	absent	5	I
JI1087	1	1	absent	5	I
JI1825	1	1	absent	5	I
JI3153	1	1	absent	5	I
JI2647	3	1	absent	3	I
JI2257	1	1	absent	3	I
JI2649	3	1	absent	3	I
JI0199	1	1	absent	4	I
JI1075	2	1	absent	4	I
JI3156	1	1	absent	4	I

## Sheet: Table S14, Aa
Supplementary Table 14, Pigmented vs. white flowers and the bHLH gene haplotype. Phenotypic characteristics and allelic variation for each accession is given.
Sample	Haplotype ID assigned manually	chr6_85150887_A/G	chr6_85151167_A/AA	FlwCol_JIC_2020_and_2023(1=White; 2=Pigment)	FlwCol_Harbin_2022(1=White; 2=Pigment)	FlwCol_Shenzhen_2021(1=White; 2=Pigment)	Phenotype used for GWAS(1=White; 2=Pigment)	A/a genotype
JI0006	Hap1	1|1	0|0	1	1	1	2	Wild type A, as expected
JI0020	Hap1	1|1	0|0	1	1	1	2	Wild type A, as expected
JI0124	Hap1	1|1	0|0	1	1	1	2	Wild type A, as expected
JI0657	Hap1	1|1	0|0	1	1	1	2	Wild type A, as expected
JI0717	Hap1	1|1	0|0	1	1	1	2	Wild type A, as expected
JI0968	Hap1	1|1	0|0	1	1	1	1	Wild type A but white: am etc.
JI1092	Hap1	1|1	0|0	1	1	1	2	Wild type A, as expected
JI1224	Hap1	1|1	0|0	1	1	1	2	Wild type A, as expected
JI1386	Hap1	1|1	0|0	NA	1	1	2	Wild type A, as expected
JI1462	Hap1	1|1	0|0	1	1	1	1	Wild type A but white: am etc.
JI1581	Hap1	1|1	0|0	1	1	1	1	Wild type A but white: am etc.
JI1592	Hap1	1|1	0|0	1	1	1	2	Wild type A, as expected
JI1870	Hap1	1|1	0|0	1	1	1	2	Wild type A, as expected
JI1915	Hap1	1|1	0|0	1	1	1	1	Wild type A but white: am etc.
JI1989	Hap1	1|1	0|0	1	1	1	1	Wild type A but white: am etc.
JI1991	Hap1	1|1	0|0	1	1	1	2	Wild type A, as expected
JI2149	Hap1	1|1	0|0	1	1	1	1	Wild type A but white: am etc.
JI2344	Hap1	1|1	0|0	1	1	1	1	Wild type A but white: am etc.
FN1453/JI3635	Hap1	1|1	0|0	NA	2	2	2	Wild type A, as expected
FN2026_7/JI3636	Hap1	1|1	0|0	NA	2	2	2	Wild type A, as expected
FN2076_5/JI3637	Hap1	1|1	0|0	NA	2	2	2	Wild type A, as expected
JI0002	Hap1	1|1	0|0	2	2	2	2	Wild type A, as expected
JI0007	Hap1	1|1	0|0	1	1	1	2	Wild type A, as expected
JI0014	Hap1	1|1	0|0	2	2	2	2	Wild type A, as expected
JI0015	Hap1	1|1	0|0	2	2	2	2	Wild type A, as expected
JI0018	Hap1	1|1	0|0	2	2	2	2	Wild type A, as expected
JI0019	Hap1	1|1	0|0	2	2	2	2	Wild type A, as expected
JI0021	Hap1	1|1	0|0	2	2	2	2	Wild type A, as expected
JI0022	Hap1	1|1	0|0	2	2	2	2	Wild type A, as expected
JI0024	Hap1	1|1	0|0	2	2	2	2	Wild type A, as expected
JI0025	Hap1	1|1	0|0	2	2	2	2	Wild type A, as expected
JI0026	Hap1	1|1	0|0	2	2	2	2	Wild type A, as expected
JI0028	Hap1	1|1	0|0	2	2	2	2	Wild type A, as expected
JI0039	Hap1	1|1	0|0	2	2	2	2	Wild type A, as expected
JI0040	Hap1	1|1	0|0	2	2	2	2	Wild type A, as expected
JI0044	Hap1	1|1	0|0	2	2	2	2	Wild type A, as expected
JI0046	Hap1	1|1	0|0	2	2	2	2	Wild type A, as expected
JI0047	Hap1	1|1	0|0	2	2	2	2	Wild type A, as expected
JI0048	Hap1	1|1	0|0	2	2	2	2	Wild type A, as expected
JI0050	Hap1	1|1	0|0	2	2	2	2	Wild type A, as expected
JI0055	Hap1	1|1	0|0	2	2	2	2	Wild type A, as expected
JI0058	Hap1	1|1	0|0	2	2	2	2	Wild type A, as expected
JI0060	Hap1	1|1	0|0	2	2	2	2	Wild type A, as expected
JI0062	Hap1	1|1	0|0	2	2	2	2	Wild type A, as expected
JI0064	Hap1	1|1	0|0	2	2	2	2	Wild type A, as expected
JI0067	Hap1	1|1	0|0	2	2	2	2	Wild type A, as expected
JI0071	Hap1	1|1	0|0	2	2	2	2	Wild type A, as expected
JI0073	Hap1	1|1	0|0	2	2	2	2	Wild type A, as expected
JI0074	Hap1	1|1	0|0	2	2	2	2	Wild type A, as expected
JI0079	Hap1	1|1	0|0	2	2	2	2	Wild type A, as expected
JI0083	Hap1	1|1	0|0	1	1	1	2	Wild type A, as expected
JI0085	Hap1	1|1	0|0	2	2	2	2	Wild type A, as expected
JI0086	Hap1	1|1	0|0	2	2	2	2	Wild type A, as expected
JI0087	Hap1	1|1	0|0	2	2	2	2	Wild type A, as expected
JI0094	Hap1	1|1	0|0	2	2	2	2	Wild type A, as expected
JI0098	Hap1	1|1	0|0	2	2	2	2	Wild type A, as expected
JI0099	Hap1	1|1	0|0	2	2	2	2	Wild type A, as expected
JI0102	Hap1	1|1	0|0	2	2	2	2	Wild type A, as expected
JI0108	Hap1	1|1	0|0	2	2	2	2	Wild type A, as expected
JI0109	Hap1	1|1	0|0	2	2	2	2	Wild type A, as expected
JI0116	Hap1	1|1	0|0	2	2	2	2	Wild type A, as expected
JI0118	Hap1	1|1	0|0	2	2	2	2	Wild type A, as expected
JI0123	Hap1	1|1	0|0	2	2	2	2	Wild type A, as expected
JI0128	Hap1	1|1	0|0	2	2	2	2	Wild type A, as expected
JI0131	Hap1	1|1	0|0	2	2	2	2	Wild type A, as expected
JI0132	Hap1	1|1	0|0	2	2	2	2	Wild type A, as expected
JI0133	Hap1	1|1	0|0	2	2	2	2	Wild type A, as expected
JI0134	Hap1	1|1	0|0	2	2	2	2	Wild type A, as expected
JI0146	Hap1	1|1	0|0	2	2	2	2	Wild type A, as expected
JI0149	Hap1	1|1	0|0	2	2	2	2	Wild type A, as expected
JI0150	Hap1	1|1	0|0	2	2	2	2	Wild type A, as expected
JI0154	Hap1	1|1	0|0	2	2	2	2	Wild type A, as expected
JI0157	Hap1	1|1	0|0	2	2	2	2	Wild type A, as expected
JI0162	Hap1	1|1	0|0	2	2	2	2	Wild type A, as expected
JI0166	Hap1	1|1	0|0	2	2	2	2	Wild type A, as expected
JI0167	Hap1	1|1	0|0	2	2	2	2	Wild type A, as expected
JI0172	Hap1	1|1	0|0	2	2	2	2	Wild type A, as expected
JI0174	Hap1	1|1	0|0	2	2	2	2	Wild type A, as expected
JI0175	Hap1	1|1	0|0	2	2	2	2	Wild type A, as expected
JI0176	Hap1	1|1	0|0	2	2	2	2	Wild type A, as expected
JI0177	Hap1	1|1	0|0	2	2	2	2	Wild type A, as expected
JI0180	Hap1	1|1	0|0	2	2	2	2	Wild type A, as expected
JI0181	Hap1	1|1	0|0	2	2	2	2	Wild type A, as expected
JI0185	Hap1	1|1	0|0	2	2	2	2	Wild type A, as expected
JI0188	Hap1	1|1	0|0	2	2	2	2	Wild type A, as expected
JI0189	Hap1	1|1	0|0	2	2	2	2	Wild type A, as expected
JI0190	Hap1	1|1	0|0	2	2	2	2	Wild type A, as expected
JI0191	Hap1	1|1	0|0	2	2	2	2	Wild type A, as expected
JI0198	Hap1	1|1	0|0	2	2	2	2	Wild type A, as expected
JI0199	Hap1	1|1	0|0	2	2	2	2	Wild type A, as expected
JI0200	Hap1	1|1	0|0	2	2	2	2	Wild type A, as expected
JI0205	Hap1	1|1	0|0	2	2	2	2	Wild type A, as expected
JI0209	Hap1	1|1	0|0	2	2	2	2	Wild type A, as expected
JI0214	Hap1	1|1	0|0	2	2	2	2	Wild type A, as expected
JI0220	Hap1	1|1	0|0	2	2	2	2	Wild type A, as expected
JI0221	Hap1	1|1	0|0	2	2	2	2	Wild type A, as expected
JI0224	Hap1	1|1	0|0	2	2	2	2	Wild type A, as expected
JI0228	Hap1	1|1	0|0	2	2	2	2	Wild type A, as expected
JI0237	Hap1	1|1	0|0	2	2	2	2	Wild type A, as expected
JI0240	Hap1	1|1	0|0	2	2	2	2	Wild type A, as expected
JI0241	Hap1	1|1	0|0	2	2	2	2	Wild type A, as expected
JI0245	Hap1	1|1	0|0	NA	2	2	2	Wild type A, as expected
JI0246	Hap1	1|1	0|0	1	2	2	2	Wild type A, as expected
JI0247	Hap1	1|1	0|0	2	2	2	2	Wild type A, as expected
JI0249	Hap1	1|1	0|0	2	2	2	2	Wild type A, as expected
JI0250	Hap1	1|1	0|0	2	2	2	2	Wild type A, as expected
JI0251	Hap1	1|1	0|0	2	2	2	2	Wild type A, as expected
JI0252	Hap1	1|1	0|0	2	2	2	2	Wild type A, as expected
JI0255	Hap1	1|1	0|0	2	2	2	2	Wild type A, as expected
JI0261	Hap1	1|1	0|0	2	2	2	2	Wild type A, as expected
JI0262	Hap1	1|1	0|0	2	2	2	2	Wild type A, as expected
JI0267	Hap1	1|1	0|0	2	2	2	2	Wild type A, as expected
JI0268	Hap1	1|1	0|0	2	2	2	2	Wild type A, as expected
JI0270	Hap1	1|1	0|0	2	2	2	2	Wild type A, as expected
JI0275	Hap1	1|1	0|0	2	2	2	2	Wild type A, as expected
JI0276	Hap1	1|1	0|0	2	2	2	2	Wild type A, as expected
JI0288	Hap1	1|1	0|0	2	2	2	2	Wild type A, as expected
JI0295	Hap1	1|1	0|0	2	2	2	2	Wild type A, as expected
JI0322	Hap1	1|1	0|0	2	2	2	2	Wild type A, as expected
JI0328	Hap1	1|1	0|0	2	2	2	2	Wild type A, as expected
JI0339	Hap1	1|1	0|0	2	2	2	2	Wild type A, as expected
JI0371	Hap1	1|1	0|0	2	2	2	2	Wild type A, as expected
JI0378	Hap1	1|1	0|0	2	2	2	2	Wild type A, as expected
JI0380	Hap1	1|1	0|0	2	2	2	2	Wild type A, as expected
JI0467	Hap1	1|1	0|0	2	2	2	2	Wild type A, as expected
JI0635	Hap1	1|1	0|0	2	2	2	2	Wild type A, as expected
JI0692	Hap1	1|1	0|0	2	2	2	2	Wild type A, as expected
JI0693	Hap1	1|1	0|0	2	2	2	2	Wild type A, as expected
JI0695	Hap1	1|1	0|0	2	2	2	2	Wild type A, as expected
JI0699	Hap1	1|1	0|0	2	2	2	2	Wild type A, as expected
JI0701	Hap1	1|1	0|0	2	2	2	2	Wild type A, as expected
JI0703	Hap1	1|1	0|0	2	2	2	2	Wild type A, as expected
JI0705	Hap1	1|1	0|0	2	2	2	2	Wild type A, as expected
JI0711	Hap1	1|1	0|0	2	2	2	2	Wild type A, as expected
JI0712	Hap1	1|1	0|0	2	2	2	2	Wild type A, as expected
JI0714	Hap1	1|1	0|0	2	2	2	2	Wild type A, as expected
JI0716	Hap1	1|1	0|0	2	2	2	2	Wild type A, as expected
JI0718	Hap1	1|1	0|0	2	2	2	2	Wild type A, as expected
JI0734	Hap1	1|1	0|0	2	2	2	2	Wild type A, as expected
JI0752	Hap1	1|1	0|0	2	2	2	2	Wild type A, as expected
JI0787	Hap1	1|1	0|0	2	2	2	2	Wild type A, as expected
JI0794	Hap1	1|1	0|0	2	2	2	2	Wild type A, as expected
JI0795	Hap1	1|1	0|0	2	2	2	2	Wild type A, as expected
JI0800	Hap1	1|1	0|0	2	2	2	2	Wild type A, as expected
JI0804	Hap1	1|1	0|0	2	2	2	2	Wild type A, as expected
JI0806	Hap1	1|1	0|0	2	2	2	2	Wild type A, as expected
JI0807	Hap1	1|1	0|0	2	2	2	2	Wild type A, as expected
JI0813	Hap1	1|1	0|0	2	2	2	2	Wild type A, as expected
JI0846	Hap1	1|1	0|0	2	2	2	2	Wild type A, as expected
JI0909	Hap1	1|1	0|0	2	2	2	2	Wild type A, as expected
JI0952	Hap1	1|1	0|0	2	2	2	2	Wild type A, as expected
JI0974	Hap1	1|1	0|0	2	2	2	2	Wild type A, as expected
JI1006	Hap1	1|1	0|0	2	2	2	2	Wild type A, as expected
JI1010	Hap1	1|1	0|0	2	2	2	2	Wild type A, as expected
JI1035	Hap1	1|1	0|0	2	2	2	2	Wild type A, as expected
JI1041	Hap1	1|1	0|0	2	2	2	2	Wild type A, as expected
JI1043	Hap1	1|1	0|0	2	2	2	2	Wild type A, as expected
JI1071	Hap1	0|1	0|0	2	2	2	2	Wild type A, as expected
JI1074	Hap1	1|1	0|0	2	2	2	2	Wild type A, as expected
JI1075	Hap1	1|1	0|0	2	2	2	2	Wild type A, as expected
JI1078	Hap1	1|1	0|0	2	2	2	2	Wild type A, as expected
JI1084	Hap1	1|1	0|0	2	2	2	2	Wild type A, as expected
JI1086	Hap1	1|1	0|0	2	2	2	2	Wild type A, as expected
JI1087	Hap1	1|1	0|0	2	2	2	2	Wild type A, as expected
JI1088	Hap1	1|1	0|0	2	NA	2	2	Wild type A, as expected
JI1089	Hap1	1|1	0|0	2	2	2	2	Wild type A, as expected
JI1091	Hap1	1|1	0|0	2	2	2	2	Wild type A, as expected
JI1093	Hap1	1|1	0|0	2	2	2	2	Wild type A, as expected
JI1094	Hap1	1|1	0|0	2	2	2	2	Wild type A, as expected
JI1095	Hap1	1|1	0|0	2	2	2	2	Wild type A, as expected
JI1096	Hap1	1|1	0|0	2	2	2	2	Wild type A, as expected
JI1109	Hap1	1|1	0|0	2	2	2	2	Wild type A, as expected
JI1117	Hap1	1|1	0|0	2	2	2	2	Wild type A, as expected
JI1121	Hap1	1|1	0|0	2	2	2	2	Wild type A, as expected
JI1132	Hap1	1|1	0|0	2	2	2	2	Wild type A, as expected
JI1228	Hap1	1|1	0|0	2	2	2	2	Wild type A, as expected
JI1260	Hap1	1|1	0|0	2	2	2	2	Wild type A, as expected
JI1261	Hap1	1|1	0|0	2	2	2	2	Wild type A, as expected
JI1263	Hap1	1|1	0|0	2	2	2	2	Wild type A, as expected
JI1266	Hap1	1|1	0|0	2	2	2	2	Wild type A, as expected
JI1268	Hap1	1|1	0|0	2	2	2	2	Wild type A, as expected
JI1269	Hap1	1|1	0|0	2	2	2	2	Wild type A, as expected
JI1270	Hap1	1|1	0|0	2	2	2	2	Wild type A, as expected
JI1307	Hap1	1|1	0|0	2	2	2	2	Wild type A, as expected
JI1395	Hap1	1|1	0|0	2	2	2	2	Wild type A, as expected
JI1434	Hap1	1|1	0|0	2	2	2	2	Wild type A, as expected
JI1444	Hap1	1|1	0|0	2	2	2	2	Wild type A, as expected
JI1453	Hap1	1|1	0|0	2	2	2	2	Wild type A, as expected
JI1469	Hap1	1|1	0|0	2	2	2	2	Wild type A, as expected
JI1477	Hap1	1|1	0|0	2	2	2	2	Wild type A, as expected
JI1482	Hap1	1|1	0|0	2	2	2	2	Wild type A, as expected
JI1486	Hap1	1|1	0|0	2	2	2	2	Wild type A, as expected
JI1519	Hap1	1|1	0|0	2	2	2	2	Wild type A, as expected
JI1523	Hap1	1|1	0|0	2	2	2	2	Wild type A, as expected
JI1524	Hap1	1|1	0|0	2	2	2	2	Wild type A, as expected
JI1528	Hap1	1|1	0|0	2	2	2	2	Wild type A, as expected
JI1529	Hap1	1|1	0|0	2	2	2	2	Wild type A, as expected
JI1535	Hap1	1|1	0|0	2	2	2	2	Wild type A, as expected
JI1538	Hap1	1|1	0|0	2	2	2	2	Wild type A, as expected
JI1539	Hap1	1|1	0|0	2	2	2	2	Wild type A, as expected
JI1542	Hap1	1|1	0|0	2	2	2	2	Wild type A, as expected
JI1543	Hap1	1|1	0|0	2	2	2	2	Wild type A, as expected
JI1547	Hap1	1|1	0|0	2	2	2	2	Wild type A, as expected
JI1548	Hap1	1|1	0|0	2	2	2	2	Wild type A, as expected
JI1578	Hap1	1|1	0|0	2	2	2	2	Wild type A, as expected
JI1585	Hap1	1|1	0|0	2	2	2	2	Wild type A, as expected
JI1590	Hap1	1|1	0|0	2	2	2	2	Wild type A, as expected
JI1607	Hap1	1|1	0|0	2	2	2	2	Wild type A, as expected
JI1625	Hap1	1|1	0|0	2	2	2	2	Wild type A, as expected
JI1626	Hap1	1|1	0|0	2	2	2	2	Wild type A, as expected
JI1636	Hap1	1|1	0|0	2	2	2	2	Wild type A, as expected
JI1639	Hap1	1|1	0|0	2	2	2	2	Wild type A, as expected
JI1652	Hap1	1|1	0|0	2	2	2	2	Wild type A, as expected
JI1663	Hap1	1|1	0|0	2	2	2	2	Wild type A, as expected
JI1669	Hap1	1|1	0|0	2	2	2	2	Wild type A, as expected
JI1679	Hap1	1|1	0|0	2	2	2	2	Wild type A, as expected
JI1698	Hap1	1|1	0|0	2	2	2	2	Wild type A, as expected
JI1699	Hap1	1|1	0|0	2	2	2	2	Wild type A, as expected
JI1702	Hap1	1|1	0|0	2	2	2	2	Wild type A, as expected
JI1703	Hap1	1|1	0|0	2	2	2	2	Wild type A, as expected
JI1704	Hap1	1|1	0|0	2	2	2	2	Wild type A, as expected
JI1705	Hap1	1|1	0|0	2	2	2	2	Wild type A, as expected
JI1706	Hap1	1|1	0|0	2	2	2	2	Wild type A, as expected
JI1707	Hap1	1|1	0|0	2	2	2	2	Wild type A, as expected
JI1713	Hap1	1|1	0|0	2	2	2	2	Wild type A, as expected
JI1714	Hap1	1|1	0|0	2	2	2	2	Wild type A, as expected
JI1722	Hap1	1|1	0|0	2	2	2	2	Wild type A, as expected
JI1793	Hap1	1|1	0|0	2	2	2	2	Wild type A, as expected
JI1794	Hap1	1|1	0|0	2	2	2	2	Wild type A, as expected
JI1795	Hap1	1|1	0|0	2	2	2	2	Wild type A, as expected
JI1796	Hap1	1|1	0|0	2	2	2	2	Wild type A, as expected
JI1834	Hap1	1|1	0|0	2	2	2	2	Wild type A, as expected
JI1835	Hap1	1|1	0|0	2	2	2	2	Wild type A, as expected
JI1846	Hap1	1|1	0|0	2	2	2	2	Wild type A, as expected
JI1850	Hap1	1|1	0|0	2	2	2	2	Wild type A, as expected
JI1851	Hap1	1|1	0|0	2	2	2	2	Wild type A, as expected
JI1854	Hap1	1|1	0|0	2	2	2	2	Wild type A, as expected
JI1863	Hap1	1|1	0|0	2	2	2	2	Wild type A, as expected
JI1865	Hap1	1|1	0|0	2	2	2	2	Wild type A, as expected
JI1885	Hap1	1|1	0|0	2	2	2	2	Wild type A, as expected
JI1891	Hap1	1|1	0|0	2	2	2	2	Wild type A, as expected
JI1894	Hap1	1|1	0|0	2	2	2	2	Wild type A, as expected
JI1900	Hap1	1|1	0|0	2	2	2	2	Wild type A, as expected
JI1910	Hap1	1|1	0|0	2	2	2	2	Wild type A, as expected
JI1911	Hap1	1|1	0|0	2	2	2	2	Wild type A, as expected
JI1919	Hap1	1|1	0|0	2	2	2	2	Wild type A, as expected
JI1920	Hap1	1|1	0|0	2	2	2	2	Wild type A, as expected
JI1921	Hap1	1|1	0|0	2	2	2	2	Wild type A, as expected
JI1933	Hap1	1|1	0|0	2	2	2	2	Wild type A, as expected
JI1946	Hap1	1|1	0|0	2	2	2	2	Wild type A, as expected
JI1947	Hap1	1|1	0|0	2	2	2	2	Wild type A, as expected
JI1948	Hap1	1|1	0|0	2	2	2	2	Wild type A, as expected
JI1956	Hap1	1|1	0|0	2	2	2	2	Wild type A, as expected
JI1962	Hap1	1|1	0|0	2	2	2	1	Wild type A but white: am etc.
JI1968	Hap1	1|1	0|0	2	2	2	2	Wild type A, as expected
JI1971	Hap1	1|1	0|0	NA	2	2	2	Wild type A, as expected
JI1995	Hap1	1|1	0|0	2	2	2	2	Wild type A, as expected
JI1996	Hap1	1|1	0|0	2	2	2	2	Wild type A, as expected
JI2001	Hap1	1|1	0|0	2	2	2	2	Wild type A, as expected
JI2016	Hap1	1|1	0|0	2	2	2	2	Wild type A, as expected
JI2018	Hap1	1|1	0|0	2	2	2	2	Wild type A, as expected
JI2048	Hap1	1|1	0|0	2	2	2	2	Wild type A, as expected
JI2055	Hap1	1|1	0|0	NA	2	2	2	Wild type A, as expected
JI2061	Hap1	1|1	0|0	2	2	2	2	Wild type A, as expected
JI2074	Hap1	1|1	0|0	2	2	2	2	Wild type A, as expected
JI2081	Hap1	1|1	0|0	2	2	2	2	Wild type A, as expected
JI2083	Hap1	1|1	0|0	2	2	2	2	Wild type A, as expected
JI2084	Hap1	1|1	0|0	2	2	2	2	Wild type A, as expected
JI2089	Hap1	1|1	0|0	2	2	2	2	Wild type A, as expected
JI2104	Hap1	1|1	0|0	NA	2	2	2	Wild type A, as expected
JI2105	Hap1	1|1	0|0	2	2	2	2	Wild type A, as expected
JI2115	Hap1	1|1	0|0	2	2	2	2	Wild type A, as expected
JI2116	Hap1	1|1	0|0	2	2	2	2	Wild type A, as expected
JI2129	Hap1	1|1	0|0	2	2	2	2	Wild type A, as expected
JI2134	Hap1	1|1	0|0	2	2	2	2	Wild type A, as expected
JI2152	Hap1	1|1	0|0	NA	2	2	2	Wild type A, as expected
JI2153	Hap1	1|1	0|0	2	2	2	2	Wild type A, as expected
JI2154	Hap1	1|1	0|0	2	2	2	2	Wild type A, as expected
JI2156	Hap1	1|1	0|0	2	2	2	2	Wild type A, as expected
JI2157	Hap1	1|1	0|0	2	2	2	2	Wild type A, as expected
JI2160	Hap1	1|1	0|0	2	2	2	2	Wild type A, as expected
JI2177	Hap1	1|1	0|0	NA	2	2	2	Wild type A, as expected
JI2182	Hap1	1|1	0|0	NA	2	2	2	Wild type A, as expected
JI2201	Hap1	1|1	0|0	2	2	2	2	Wild type A, as expected
JI2202	Hap1	1|1	0|0	2	2	2	2	Wild type A, as expected
JI2206	Hap1	1|1	0|0	2	2	2	2	Wild type A, as expected
JI2217	Hap1	1|1	0|0	2	2	2	2	Wild type A, as expected
JI2236	Hap1	1|1	0|0	2	2	2	2	Wild type A, as expected
JI2262	Hap1	1|1	0|0	NA	2	2	2	Wild type A, as expected
JI2277	Hap1	1|1	0|0	2	2	2	2	Wild type A, as expected
JI2279	Hap1	1|1	0|0	2	2	2	2	Wild type A, as expected
JI2311	Hap1	1|1	0|0	2	2	NA	2	Wild type A, as expected
JI2312	Hap1	1|1	0|0	NA	2	2	2	Wild type A, as expected
JI2355	Hap1	1|1	0|0	2	2	2	2	Wild type A, as expected
JI2385	Hap1	1|1	0|0	2	2	2	2	Wild type A, as expected
JI2423	Hap1	1|1	0|0	NA	2	2	2	Wild type A, as expected
JI2436	Hap1	1|1	0|0	NA	2	2	2	Wild type A, as expected
JI2517	Hap1	1|1	0|0	2	2	2	2	Wild type A, as expected
JI2519	Hap1	1|1	0|0	2	2	2	2	Wild type A, as expected
JI2523	Hap1	1|1	0|0	2	2	2	2	Wild type A, as expected
JI2530	Hap1	1|1	0|0	NA	2	2	2	Wild type A, as expected
JI2548	Hap1	1|1	0|0	NA	2	2	2	Wild type A, as expected
JI2559	Hap1	1|1	0|0	NA	2	2	2	Wild type A, as expected
JI2561	Hap1	1|1	0|0	NA	2	2	2	Wild type A, as expected
JI2583	Hap1	1|1	0|0	2	2	2	2	Wild type A, as expected
JI2603	Hap1	1|1	0|0	NA	2	2	2	Wild type A, as expected
JI2611	Hap1	1|1	0|0	2	2	2	2	Wild type A, as expected
JI2693	Hap1	1|1	0|0	2	2	2	2	Wild type A, as expected
JI2695	Hap1	1|1	0|0	NA	2	2	2	Wild type A, as expected
JI2698	Hap1	1|1	0|0	2	2	2	2	Wild type A, as expected
JI2699	Hap1	1|1	0|0	2	2	2	2	Wild type A, as expected
JI2707	Hap1	1|1	0|0	2	2	2	2	Wild type A, as expected
JI2716	Hap1	1|1	0|0	2	2	2	2	Wild type A, as expected
JI2742	Hap1	1|1	0|0	2	2	2	2	Wild type A, as expected
JI2743	Hap1	1|1	0|0	2	2	2	2	Wild type A, as expected
JI2757	Hap1	1|1	0|0	2	2	2	2	Wild type A, as expected
JI2761	Hap1	1|1	0|0	2	2	2	2	Wild type A, as expected
JI2782	Hap1	1|1	0|0	2	2	2	2	Wild type A, as expected
JI2822	Hap1	1|1	0|0	2	2	2	2	Wild type A, as expected
JI3006	Hap1	1|1	0|0	2	2	2	2	Wild type A, as expected
JI3022	Hap1	1|1	0|0	NA	2	2	2	Wild type A, as expected
JI3025	Hap1	1|1	0|0	NA	2	2	2	Wild type A, as expected
JI3030	Hap1	1|1	0|0	NA	2	2	2	Wild type A, as expected
JI3049	Hap1	1|1	0|0	2	2	2	2	Wild type A, as expected
JI3080	Hap1	1|1	0|0	2	2	2	2	Wild type A, as expected
JI3086	Hap1	1|1	0|0	2	1	2	2	Wild type A, as expected
JI3096	Hap1	1|1	0|0	2	2	2	2	Wild type A, as expected
JI3098	Hap1	1|1	0|0	2	2	2	2	Wild type A, as expected
JI3119	Hap1	1|1	0|0	2	2	2	2	Wild type A, as expected
JI3120	Hap1	1|1	0|0	2	2	2	2	Wild type A, as expected
JI3148	Hap1	1|1	0|0	NA	2	2	2	Wild type A, as expected
JI3149	Hap1	1|1	0|0	2	2	2	2	Wild type A, as expected
JI3153	Hap1	1|1	0|0	2	NA	2	2	Wild type A, as expected
JI3155	Hap1	1|1	0|0	2	2	2	2	Wild type A, as expected
JI3162	Hap1	1|1	0|0	1	1	1	2	Wild type A, as expected
JI3186	Hap1	1|1	0|0	NA	2	2	2	Wild type A, as expected
JI3274	Hap1	1|1	0|0	NA	2	2	2	Wild type A, as expected
JI3605	Hap1	1|1	0|0	2	2	2	2	Wild type A, as expected
JI1737	Hap1	1|1	0|0	2	2	2	2	Wild type A, as expected
JI0012	Hap1	1|1	0|0	1	1	1	2	Wild type A, as expected
JI2776	Hap1	0|1	0|0	2	2	2	2	Wild type A, as expected
JI3604	Hap1	1|1	0|0	NA	NA	NA	2	Wild type A, as expected
JI3163	Hap1	1|1	0|0	NA	NA	NA	2	Wild type A, as expected
JI3151	Hap1	1|1	0|0	NA	NA	NA	2	Wild type A, as expected
JI3150	Hap1	1|1	0|0	NA	NA	NA	2	Wild type A, as expected
JI3511	Hap1	1|1	0|0	NA	NA	NA	2	Wild type A, as expected
JI2629	Hap1	1|1	0|0	NA	NA	NA	2	Wild type A, as expected
JI0147	Hap1	1|1	0|0	NA	NA	NA	2	Wild type A, as expected
JI0084	Hap1	0|1	0|0	1	1	1	2	Wild type A, as expected
JI3147	Hap1	1|1	0|0	NA	NA	NA	1	Wild type A but white: am etc.
JI3553	Hap1	1|1	0|0	NA	NA	NA	2	Wild type A, as expected
JI3558	Hap1	1|1	0|0	NA	NA	NA	2	Wild type A, as expected
JI2724	Hap1	1|1	0|0	NA	NA	NA	2	Wild type A, as expected
JI3263	Hap1	1|1	0|0	NA	NA	NA	2	Wild type A, as expected
JI3159	Hap1	1|1	0|0	NA	NA	NA	2	Wild type A, as expected
JI3158	Hap1	1|1	0|0	NA	NA	NA	2	Wild type A, as expected
JI3276	Hap1	1|1	0|0	NA	NA	NA	2	Wild type A, as expected
JI2538	Hap1	1|1	0|0	NA	NA	NA	2	Wild type A, as expected
JI3157	Hap1	1|1	0|0	NA	NA	NA	2	Wild type A, as expected
JI3156	Hap1	1|1	0|0	NA	NA	NA	2	Wild type A, as expected
JI2544	Hap1	1|1	0|0	NA	NA	NA	2	Wild type A, as expected
JI2473	Hap1	1|1	0|0	NA	NA	NA	2	Wild type A, as expected
JI3557	Hap1	1|1	0|0	NA	NA	NA	2	Wild type A, as expected
JI3273	Hap1	1|1	0|0	NA	NA	NA	2	Wild type A, as expected
JI3275	Hap1	1|1	0|0	NA	NA	NA	2	Wild type A, as expected
JI3271	Hap1	1|1	0|0	NA	NA	NA	2	Wild type A, as expected
JI0080	Hap1	0|1	0|0	1	1	1	2	Wild type A, as expected
JI2017	Hap1	1|1	0|0	NA	NA	NA	2	Wild type A, as expected
JI0066	Hap2	1|1	1|1	1	1	1	1	JI1987 a allele, white as expected
JI0069	Hap2	1|1	1|1	1	1	1	1	JI1987 a allele, white as expected
JI0114	Hap2	1|1	1|1	1	1	1	1	JI1987 a allele, white as expected
JI0122	Hap2	1|1	1|1	1	1	1	1	JI1987 a allele, white as expected
JI0208	Hap2	1|1	1|1	1	1	1	1	JI1987 a allele, white as expected
JI0344	Hap2	1|1	1|1	1	1	1	1	JI1987 a allele, white as expected
JI0364	Hap2	1|1	1|1	1	1	1	1	JI1987 a allele, white as expected
JI0411	Hap2	1|1	1|1	1	1	1	1	JI1987 a allele, white as expected
JI0466	Hap2	1|1	1|1	1	1	1	1	JI1987 a allele, white as expected
JI0496	Hap2	1|1	1|1	1	1	1	1	JI1987 a allele, white as expected
JI0568	Hap2	1|1	1|1	1	1	1	1	JI1987 a allele, white as expected
JI0574	Hap2	1|1	1|1	1	1	1	1	JI1987 a allele, white as expected
JI0780	Hap2	1|1	1|1	1	1	1	1	JI1987 a allele, white as expected
JI0815	Hap2	1|1	1|1	1	1	1	1	JI1987 a allele, white as expected
JI0817	Hap2	1|1	1|1	1	1	1	1	JI1987 a allele, white as expected
JI0819	Hap2	1|1	1|1	1	1	1	1	JI1987 a allele, white as expected
JI0825	Hap2	1|1	1|1	1	1	1	1	JI1987 a allele, white as expected
JI0955	Hap2	1|1	1|1	1	1	1	1	JI1987 a allele, white as expected
JI0965	Hap2	1|1	1|1	1	1	1	1	JI1987 a allele, white as expected
JI0971	Hap2	1|1	1|1	1	1	1	1	JI1987 a allele, white as expected
JI1217	Hap2	1|1	1|1	1	1	1	1	JI1987 a allele, white as expected
JI1219	Hap2	1|1	1|1	1	1	1	1	JI1987 a allele, white as expected
JI1294	Hap2	1|1	1|1	1	1	1	1	JI1987 a allele, white as expected
JI1569	Hap2	1|1	1|1	1	1	1	1	JI1987 a allele, white as expected
JI1791	Hap2	1|1	1|1	1	1	1	1	JI1987 a allele, white as expected
JI1804	Hap2	1|1	1|1	1	1	1	1	JI1987 a allele, white as expected
JI1817	Hap2	1|1	.|.	1	1	1	1	JI1987 a allele, white as expected
JI1848	Hap2	1|1	1|1	1	1	1	1	JI1987 a allele, white as expected
JI1882	Hap2	1|1	1|1	1	1	1	1	JI1987 a allele, white as expected
JI1985	Hap2	1|1	1|1	1	1	1	1	JI1987 a allele, white as expected
JI2273	Hap2	1|1	1|1	1	1	1	1	JI1987 a allele, white as expected
JI2301	Hap2	1|1	1|1	NA	1	1	1	JI1987 a allele, white as expected
JI2348	Hap2	1|1	1|1	1	1	1	1	JI1987 a allele, white as expected
JI2366	Hap2	1|1	1|1	1	1	1	1	JI1987 a allele, white as expected
JI2402	Hap2	1|1	1|1	NA	1	1	1	JI1987 a allele, white as expected
JI0735	Hap3	1|1	0|0	1	1	1	1	2 exon deletion
JI2331	Hap3	1|1	0|0	1	1	1	1	2 exon deletion
JI2394	Hap3	1|1	0|0	1	1	1	1	2 exon deletion
JI2764	Hap3	1|1	0|0	1	1	1	1	2 exon deletion
JI1775	Hap4	.|.	.|.	1	1	1	1	six exon deletion
Baryton/JI3638	Hap5	0|0	0|0	NA	1	1	1	Cameor allele , a as expected
JI0033	Hap5	0|0	0|0	1	1	1	1	Cameor allele , a as expected
JI0034	Hap5	0|0	0|0	1	1	1	1	Cameor allele , a as expected
JI0035	Hap5	0|0	0|0	1	1	1	1	Cameor allele , a as expected
JI0037	Hap5	0|0	0|0	1	1	1	1	Cameor allele , a as expected
JI0043	Hap5	0|0	0|0	1	1	1	1	Cameor allele , a as expected
JI0057	Hap5	0|0	0|0	1	1	1	1	Cameor allele , a as expected
JI0061	Hap5	0|0	0|0	1	1	1	1	Cameor allele , a as expected
JI0072	Hap5	0|0	0|0	1	1	1	1	Cameor allele , a as expected
JI0077	Hap5	0|0	0|0	1	1	1	1	Cameor allele , a as expected
JI0082	Hap5	0|0	0|0	1	1	1	1	Cameor allele , a as expected
JI0089	Hap5	0|0	0|0	1	1	1	1	Cameor allele , a as expected
JI0120	Hap5	0|0	0|0	1	1	1	1	Cameor allele , a as expected
JI0125	Hap5	0|0	0|0	1	1	1	1	Cameor allele , a as expected
JI0136	Hap5	0|0	0|0	1	1	1	1	Cameor allele , a as expected
JI0138	Hap5	0|0	0|0	1	1	1	1	Cameor allele , a as expected
JI0144	Hap5	0|0	0|0	1	1	1	1	Cameor allele , a as expected
JI0145	Hap5	0|0	0|0	1	1	1	1	Cameor allele , a as expected
JI0148	Hap5	0|0	0|0	1	1	1	1	Cameor allele , a as expected
JI0151	Hap5	0|0	0|0	1	1	1	1	Cameor allele , a as expected
JI0152	Hap5	0|0	0|0	1	1	1	1	Cameor allele , a as expected
JI0184	Hap5	0|0	0|0	1	1	1	1	Cameor allele , a as expected
JI0210	Hap5	0|0	0|0	1	1	1	1	Cameor allele , a as expected
JI0216	Hap5	0|0	0|0	1	1	1	1	Cameor allele , a as expected
JI0222	Hap5	0|0	0|0	NA	1	1	1	Cameor allele , a as expected
JI0223	Hap5	0|0	0|0	1	1	1	1	Cameor allele , a as expected
JI0257	Hap5	0|0	0|0	1	1	1	1	Cameor allele , a as expected
JI0298	Hap5	0|0	0|0	1	1	1	1	Cameor allele , a as expected
JI0301	Hap5	0|0	0|0	1	1	1	1	Cameor allele , a as expected
JI0303	Hap5	0|0	0|0	1	1	1	1	Cameor allele , a as expected
JI0304	Hap5	0|0	0|0	1	1	1	1	Cameor allele , a as expected
JI0305	Hap5	0|0	0|0	1	1	1	1	Cameor allele , a as expected
JI0314	Hap5	0|0	0|0	1	1	1	1	Cameor allele , a as expected
JI0318	Hap5	0|0	0|0	1	1	1	1	Cameor allele , a as expected
JI0319	Hap5	0|0	0|0	1	1	1	1	Cameor allele , a as expected
JI0323	Hap5	0|0	0|0	1	1	1	1	Cameor allele , a as expected
JI0327	Hap5	0|0	0|0	1	1	1	1	Cameor allele , a as expected
JI0329	Hap5	0|0	0|0	1	1	1	1	Cameor allele , a as expected
JI0330	Hap5	0|0	0|0	1	1	1	1	Cameor allele , a as expected
JI0335	Hap5	0|0	0|0	1	1	1	1	Cameor allele , a as expected
JI0340	Hap5	0|0	0|0	1	1	1	1	Cameor allele , a as expected
JI0341	Hap5	0|0	0|0	1	NA	1	1	Cameor allele , a as expected
JI0342	Hap5	0|0	0|0	1	1	1	1	Cameor allele , a as expected
JI0354	Hap5	0|0	0|0	1	1	1	1	Cameor allele , a as expected
JI0356	Hap5	0|0	0|0	1	1	1	1	Cameor allele , a as expected
JI0358	Hap5	0|0	0|0	1	1	1	1	Cameor allele , a as expected
JI0361	Hap5	0|0	0|0	1	NA	1	1	Cameor allele , a as expected
JI0362	Hap5	0|0	0|0	1	1	1	1	Cameor allele , a as expected
JI0368	Hap5	0|0	0|0	1	1	1	1	Cameor allele , a as expected
JI0369	Hap5	0|0	0|0	1	1	1	1	Cameor allele , a as expected
JI0383	Hap5	0|0	0|0	1	1	1	1	Cameor allele , a as expected
JI0389	Hap5	0|0	0|0	1	1	1	1	Cameor allele , a as expected
JI0391	Hap5	0|0	0|0	1	1	1	1	Cameor allele , a as expected
JI0399	Hap5	0|0	0|0	1	1	1	1	Cameor allele , a as expected
JI0400	Hap5	0|0	0|0	1	1	1	1	Cameor allele , a as expected
JI0402	Hap5	0|0	0|0	1	1	1	1	Cameor allele , a as expected
JI0406	Hap5	0|0	0|0	1	1	1	1	Cameor allele , a as expected
JI0409	Hap5	0|0	0|0	1	1	1	1	Cameor allele , a as expected
JI0417	Hap5	0|0	0|0	1	1	1	1	Cameor allele , a as expected
JI0420	Hap5	0|0	0|0	1	1	1	1	Cameor allele , a as expected
JI0423	Hap5	0|0	0|0	1	1	1	1	Cameor allele , a as expected
JI0424	Hap5	0|0	0|0	1	1	1	1	Cameor allele , a as expected
JI0428	Hap5	0|0	0|0	1	1	1	1	Cameor allele , a as expected
JI0430	Hap5	0|0	0|0	1	1	1	1	Cameor allele , a as expected
JI0434	Hap5	0|0	0|0	1	1	1	1	Cameor allele , a as expected
JI0441	Hap5	0|0	0|0	1	1	1	1	Cameor allele , a as expected
JI0460	Hap5	0|0	0|0	1	1	1	1	Cameor allele , a as expected
JI0474	Hap5	0|0	0|0	1	1	1	1	Cameor allele , a as expected
JI0491	Hap5	0|0	0|0	1	1	1	1	Cameor allele , a as expected
JI0498	Hap5	0|0	0|0	1	1	1	1	Cameor allele , a as expected
JI0504	Hap5	0|0	0|0	1	1	1	1	Cameor allele , a as expected
JI0506	Hap5	0|0	0|0	1	1	1	1	Cameor allele , a as expected
JI0516	Hap5	0|0	0|0	1	1	1	1	Cameor allele , a as expected
JI0531	Hap5	0|0	0|0	1	1	1	1	Cameor allele , a as expected
JI0536	Hap5	0|0	0|0	1	NA	1	1	Cameor allele , a as expected
JI0539	Hap5	0|0	0|0	1	1	1	1	Cameor allele , a as expected
JI0546	Hap5	0|0	0|0	1	1	1	1	Cameor allele , a as expected
JI0550	Hap5	0|0	0|0	1	1	1	1	Cameor allele , a as expected
JI0554	Hap5	0|0	0|0	1	1	1	1	Cameor allele , a as expected
JI0558	Hap5	0|0	0|0	1	1	1	1	Cameor allele , a as expected
JI0560	Hap5	0|0	0|0	1	1	1	1	Cameor allele , a as expected
JI0566	Hap5	0|0	0|0	1	1	1	1	Cameor allele , a as expected
JI0571	Hap5	0|0	0|0	1	1	1	1	Cameor allele , a as expected
JI0573	Hap5	0|0	0|0	1	1	1	1	Cameor allele , a as expected
JI0582	Hap5	0|0	0|0	1	NA	1	1	Cameor allele , a as expected
JI0584	Hap5	0|0	0|0	1	1	1	1	Cameor allele , a as expected
JI0607	Hap5	0|0	0|0	1	1	1	1	Cameor allele , a as expected
JI0614	Hap5	0|0	0|0	1	1	1	1	Cameor allele , a as expected
JI0616	Hap5	0|0	0|0	1	1	1	1	Cameor allele , a as expected
JI0651	Hap5	0|0	0|0	1	1	1	1	Cameor allele , a as expected
JI0653	Hap5	0|0	0|0	1	1	1	1	Cameor allele , a as expected
JI0662	Hap5	0|0	0|0	1	1	1	1	Cameor allele , a as expected
JI0665	Hap5	0|0	0|0	1	1	1	1	Cameor allele , a as expected
JI0670	Hap5	0|0	0|0	NA	1	1	1	Cameor allele , a as expected
JI0681	Hap5	0|0	0|0	1	1	1	1	Cameor allele , a as expected
JI0720	Hap5	0|0	0|0	1	1	1	1	Cameor allele , a as expected
JI0721	Hap5	0|0	0|0	1	1	1	1	Cameor allele , a as expected
JI0727	Hap5	0|0	0|0	1	1	1	1	Cameor allele , a as expected
JI0737	Hap5	0|0	0|0	1	1	1	1	Cameor allele , a as expected
JI0738	Hap5	0|0	0|0	1	1	1	1	Cameor allele , a as expected
JI0745	Hap5	0|0	0|0	1	1	1	1	Cameor allele , a as expected
JI0746	Hap5	0|0	0|0	1	1	1	1	Cameor allele , a as expected
JI0754	Hap5	0|0	0|0	1	1	1	1	Cameor allele , a as expected
JI0757	Hap5	0|0	0|0	1	1	1	1	Cameor allele , a as expected
JI0774	Hap5	0|0	0|0	1	1	1	1	Cameor allele , a as expected
JI0781	Hap5	0|0	0|0	1	1	1	1	Cameor allele , a as expected
JI0782	Hap5	0|0	0|0	1	1	1	1	Cameor allele , a as expected
JI0790	Hap5	0|0	0|0	1	1	1	1	Cameor allele , a as expected
JI0799	Hap5	0|0	0|0	1	1	1	1	Cameor allele , a as expected
JI0814	Hap5	0|0	0|0	1	1	1	1	Cameor allele , a as expected
JI0820	Hap5	0|0	0|0	1	1	1	1	Cameor allele , a as expected
JI0829	Hap5	0|0	0|0	1	1	1	1	Cameor allele , a as expected
JI0832	Hap5	0|0	0|0	1	1	1	1	Cameor allele , a as expected
JI0837	Hap5	0|0	0|0	1	1	1	1	Cameor allele , a as expected
JI0841	Hap5	0|0	0|0	1	1	1	1	Cameor allele , a as expected
JI0844	Hap5	0|0	0|0	1	1	1	1	Cameor allele , a as expected
JI0853	Hap5	0|0	0|0	1	NA	1	1	Cameor allele , a as expected
JI0854	Hap5	0|0	0|0	1	1	1	1	Cameor allele , a as expected
JI0859	Hap5	0|0	0|0	1	1	1	1	Cameor allele , a as expected
JI0863	Hap5	0|0	0|0	1	1	1	1	Cameor allele , a as expected
JI0870	Hap5	0|0	0|0	1	1	1	1	Cameor allele , a as expected
JI0874	Hap5	0|0	0|0	1	1	1	1	Cameor allele , a as expected
JI0877	Hap5	0|0	0|0	1	1	1	1	Cameor allele , a as expected
JI0884	Hap5	0|0	0|0	1	1	1	1	Cameor allele , a as expected
JI0887	Hap5	0|0	0|0	1	1	1	1	Cameor allele , a as expected
JI0892	Hap5	0|0	0|0	1	1	1	1	Cameor allele , a as expected
JI0893	Hap5	0|0	0|0	1	1	1	1	Cameor allele , a as expected
JI0907	Hap5	0|0	0|0	1	1	1	1	Cameor allele , a as expected
JI0930	Hap5	0|0	0|0	1	1	1	1	Cameor allele , a as expected
JI0932	Hap5	0|0	0|0	1	1	1	1	Cameor allele , a as expected
JI0935	Hap5	0|0	0|0	1	1	1	1	Cameor allele , a as expected
JI0949	Hap5	0|0	0|0	1	1	1	1	Cameor allele , a as expected
JI0950	Hap5	0|0	0|0	1	1	1	1	Cameor allele , a as expected
JI0957	Hap5	0|0	0|0	1	1	1	1	Cameor allele , a as expected
JI0958	Hap5	0|0	0|0	1	1	1	1	Cameor allele , a as expected
JI0991	Hap5	0|0	0|0	1	1	1	1	Cameor allele , a as expected
JI1002	Hap5	0|0	0|0	1	1	1	1	Cameor allele , a as expected
JI1014	Hap5	0|0	0|0	1	1	1	1	Cameor allele , a as expected
JI1017	Hap5	0|0	0|0	1	1	1	1	Cameor allele , a as expected
JI1055	Hap5	0|0	0|0	1	1	1	1	Cameor allele , a as expected
JI1058	Hap5	0|0	0|0	1	1	1	1	Cameor allele , a as expected
JI1082	Hap5	0|0	0|0	1	1	1	1	Cameor allele , a as expected
JI1085	Hap5	0|0	0|0	1	1	1	1	Cameor allele , a as expected
JI1125	Hap5	0|0	0|0	1	1	1	1	Cameor allele , a as expected
JI1128	Hap5	0|0	0|0	1	1	1	1	Cameor allele , a as expected
JI1129	Hap5	0|0	0|0	1	1	1	1	Cameor allele , a as expected
JI1147	Hap5	0|0	0|0	1	1	1	1	Cameor allele , a as expected
JI1165	Hap5	0|0	0|0	1	1	1	1	Cameor allele , a as expected
JI1173	Hap5	0|0	0|0	1	1	1	1	Cameor allele , a as expected
JI1179	Hap5	0|0	0|0	1	1	1	1	Cameor allele , a as expected
JI1187	Hap5	0|0	0|0	1	1	1	1	Cameor allele , a as expected
JI1194	Hap5	0|0	0|0	1	1	1	1	Cameor allele , a as expected
JI1200	Hap5	0|0	0|0	1	1	1	1	Cameor allele , a as expected
JI1201	Hap5	0|0	0|0	1	1	1	1	Cameor allele , a as expected
JI1205	Hap5	0|0	0|0	1	1	1	1	Cameor allele , a as expected
JI1210	Hap5	0|0	0|0	1	1	1	1	Cameor allele , a as expected
JI1212	Hap5	0|0	0|0	1	1	1	1	Cameor allele , a as expected
JI1214	Hap5	0|0	0|0	1	1	1	1	Cameor allele , a as expected
JI1222	Hap5	0|0	0|0	1	1	1	1	Cameor allele , a as expected
JI1227	Hap5	0|0	0|0	1	1	1	1	Cameor allele , a as expected
JI1229	Hap5	0|0	0|0	1	1	1	1	Cameor allele , a as expected
JI1231	Hap5	0|0	0|0	NA	1	1	1	Cameor allele , a as expected
JI1237	Hap5	0|0	0|0	NA	1	1	1	Cameor allele , a as expected
JI1245	Hap5	0|0	0|0	1	1	1	1	Cameor allele , a as expected
JI1246	Hap5	0|0	0|0	NA	1	1	1	Cameor allele , a as expected
JI1265	Hap5	0|0	0|0	1	1	1	1	Cameor allele , a as expected
JI1272	Hap5	0|0	0|0	1	1	1	1	Cameor allele , a as expected
JI1277	Hap5	0|0	0|0	1	1	1	1	Cameor allele , a as expected
JI1280	Hap5	0|0	0|0	1	1	1	1	Cameor allele , a as expected
JI1282	Hap5	0|0	0|0	1	1	1	1	Cameor allele , a as expected
JI1303	Hap5	0|0	0|0	1	1	1	1	Cameor allele , a as expected
JI1313	Hap5	0|0	0|0	1	1	1	1	Cameor allele , a as expected
JI1344	Hap5	0|0	0|0	1	1	1	1	Cameor allele , a as expected
JI1345	Hap5	0|0	0|0	1	1	1	1	Cameor allele , a as expected
JI1366	Hap5	0|0	0|0	1	1	1	1	Cameor allele , a as expected
JI1398	Hap5	0|0	0|0	1	1	1	1	Cameor allele , a as expected
JI1407	Hap5	0|0	0|0	1	1	1	1	Cameor allele , a as expected
JI1423	Hap5	0|0	0|0	NA	1	1	1	Cameor allele , a as expected
JI1464	Hap5	0|0	0|0	2	2	2	1	Cameor allele , a as expected
JI1491	Hap5	0|0	0|0	1	1	1	1	Cameor allele , a as expected
JI1492	Hap5	0|0	0|0	1	1	1	1	Cameor allele , a as expected
JI1503	Hap5	0|0	0|0	1	1	1	1	Cameor allele , a as expected
JI1555	Hap5	0|0	0|0	1	1	1	1	Cameor allele , a as expected
JI1562	Hap5	0|0	0|0	1	1	1	1	Cameor allele , a as expected
JI1573	Hap5	0|0	0|0	1	1	1	1	Cameor allele , a as expected
JI1575	Hap5	0|0	0|0	1	1	1	1	Cameor allele , a as expected
JI1577	Hap5	0|0	0|0	1	1	1	1	Cameor allele , a as expected
JI1587	Hap5	0|0	0|0	1	1	1	1	Cameor allele , a as expected
JI1588	Hap5	0|0	0|0	1	1	1	1	Cameor allele , a as expected
JI1718	Hap5	0|0	0|0	1	1	1	1	Cameor allele , a as expected
JI1720	Hap5	0|0	0|0	1	1	1	1	Cameor allele , a as expected
JI1721	Hap5	0|0	0|0	1	1	1	1	Cameor allele , a as expected
JI1724	Hap5	0|0	0|0	1	1	1	1	Cameor allele , a as expected
JI1732	Hap5	0|0	0|0	1	1	1	1	Cameor allele , a as expected
JI1733	Hap5	0|0	0|0	1	1	1	1	Cameor allele , a as expected
JI1735	Hap5	0|0	0|0	1	1	1	1	Cameor allele , a as expected
JI1747	Hap5	0|0	0|0	1	1	1	1	Cameor allele , a as expected
JI1748	Hap5	0|0	0|0	1	1	1	1	Cameor allele , a as expected
JI1762	Hap5	0|0	0|0	1	1	1	1	Cameor allele , a as expected
JI1768	Hap5	0|0	0|0	1	1	1	1	Cameor allele , a as expected
JI1772	Hap5	0|0	0|0	1	1	1	1	Cameor allele , a as expected
JI1774	Hap5	0|0	0|0	1	1	1	1	Cameor allele , a as expected
JI1792	Hap5	0|0	0|0	1	1	1	1	Cameor allele , a as expected
JI1800	Hap5	0|0	0|0	1	1	1	1	Cameor allele , a as expected
JI1816	Hap5	0|0	0|0	1	1	1	1	Cameor allele , a as expected
JI1822	Hap5	0|0	0|0	1	1	1	1	Cameor allele , a as expected
JI1829	Hap5	0|0	0|0	1	1	1	1	Cameor allele , a as expected
JI1837	Hap5	0|0	0|0	1	1	1	1	Cameor allele , a as expected
JI1922	Hap5	0|0	0|0	1	1	1	1	Cameor allele , a as expected
JI1980	Hap5	0|0	0|0	1	1	1	1	Cameor allele , a as expected
JI1981	Hap5	0|0	0|0	1	1	1	1	Cameor allele , a as expected
JI2007	Hap5	0|0	0|0	1	1	1	1	Cameor allele , a as expected
JI2036	Hap5	0|0	0|0	1	1	1	1	Cameor allele , a as expected
JI2058	Hap5	0|0	0|0	1	1	1	1	Cameor allele , a as expected
JI2100	Hap5	0|0	0|0	NA	1	1	1	Cameor allele , a as expected
JI2106	Hap5	0|0	0|0	NA	1	1	1	Cameor allele , a as expected
JI2108	Hap5	0|0	0|0	NA	1	1	1	Cameor allele , a as expected
JI2114	Hap5	0|0	0|0	1	1	1	1	Cameor allele , a as expected
JI2126	Hap5	0|0	0|0	1	1	1	1	Cameor allele , a as expected
JI2150	Hap5	0|0	0|0	1	1	1	1	Cameor allele , a as expected
JI2174	Hap5	0|0	0|0	1	1	1	1	Cameor allele , a as expected
JI2193	Hap5	0|0	0|0	NA	1	1	1	Cameor allele , a as expected
JI2219	Hap5	0|0	0|0	1	1	1	1	Cameor allele , a as expected
JI2221	Hap5	0|0	0|0	1	1	1	1	Cameor allele , a as expected
JI2223	Hap5	0|0	0|0	1	1	1	1	Cameor allele , a as expected
JI2228	Hap5	0|0	0|0	1	1	1	1	Cameor allele , a as expected
JI2233	Hap5	0|0	0|0	1	1	1	1	Cameor allele , a as expected
JI2240	Hap5	0|0	0|0	NA	1	1	1	Cameor allele , a as expected
JI2243	Hap5	0|0	0|0	NA	1	1	1	Cameor allele , a as expected
JI2257	Hap5	0|0	0|0	NA	1	1	1	Cameor allele , a as expected
JI2274	Hap5	0|0	0|0	1	1	1	1	Cameor allele , a as expected
JI2294	Hap5	0|0	0|0	1	1	1	1	Cameor allele , a as expected
JI2296	Hap5	0|0	0|0	NA	1	1	1	Cameor allele , a as expected
JI2300	Hap5	0|0	0|0	NA	1	1	1	Cameor allele , a as expected
JI2314	Hap5	0|0	0|0	1	1	1	1	Cameor allele , a as expected
JI2317	Hap5	0|0	0|0	1	1	1	1	Cameor allele , a as expected
JI2321	Hap5	0|0	0|0	1	1	1	1	Cameor allele , a as expected
JI2324	Hap5	0|0	0|0	1	1	1	1	Cameor allele , a as expected
JI2329	Hap5	0|0	0|0	1	1	1	1	Cameor allele , a as expected
JI2332	Hap5	0|0	0|0	1	1	1	1	Cameor allele , a as expected
JI2345	Hap5	0|0	0|0	NA	1	1	1	Cameor allele , a as expected
JI2349	Hap5	0|0	0|0	1	1	1	1	Cameor allele , a as expected
JI2350	Hap5	0|0	0|0	1	1	1	1	Cameor allele , a as expected
JI2353	Hap5	0|0	0|0	1	1	1	1	Cameor allele , a as expected
JI2371	Hap5	0|0	0|0	1	1	NA	1	Cameor allele , a as expected
JI2374	Hap5	0|0	0|0	1	1	1	1	Cameor allele , a as expected
JI2393	Hap5	0|0	0|0	1	1	1	1	Cameor allele , a as expected
JI2401	Hap5	0|0	0|0	NA	1	1	1	Cameor allele , a as expected
JI2403	Hap5	0|0	0|0	NA	1	1	1	Cameor allele , a as expected
JI2410	Hap5	0|0	0|0	NA	1	1	1	Cameor allele , a as expected
JI2429	Hap5	0|0	0|0	NA	1	1	1	Cameor allele , a as expected
JI2434	Hap5	0|0	0|0	NA	1	1	1	Cameor allele , a as expected
JI2464	Hap5	0|0	0|0	NA	1	1	1	Cameor allele , a as expected
JI2500	Hap5	0|0	0|0	NA	1	1	1	Cameor allele , a as expected
JI2501	Hap5	0|0	0|0	NA	1	1	1	Cameor allele , a as expected
JI2595	Hap5	0|0	0|0	NA	1	1	1	Cameor allele , a as expected
JI2623	Hap5	0|0	0|0	1	1	1	1	Cameor allele , a as expected
JI2644	Hap5	0|0	0|0	1	1	1	1	Cameor allele , a as expected
JI2647	Hap5	0|0	0|0	1	1	1	1	Cameor allele , a as expected
JI2648	Hap5	0|0	0|0	1	1	1	1	Cameor allele , a as expected
JI2649	Hap5	0|0	0|0	1	1	1	1	Cameor allele , a as expected
JI2659	Hap5	0|0	0|0	1	1	1	1	Cameor allele , a as expected
JI2683	Hap5	0|0	0|0	NA	1	1	1	Cameor allele , a as expected
JI2711	Hap5	0|0	0|0	1	1	1	1	Cameor allele , a as expected
JI2753	Hap5	0|0	0|0	1	1	1	1	Cameor allele , a as expected
JI2787	Hap5	0|0	0|0	1	1	1	1	Cameor allele , a as expected
JI3029	Hap5	0|0	0|0	NA	1	1	1	Cameor allele , a as expected
JI3053	Hap5	0|0	0|0	NA	1	1	1	Cameor allele , a as expected
JI3134	Hap5	0|0	0|0	NA	1	1	1	Cameor allele , a as expected
JI3167	Hap5	0|0	0|0	NA	1	1	1	Cameor allele , a as expected
JI3178	Hap5	0|0	0|0	NA	1	1	1	Cameor allele , a as expected
JI3179	Hap5	0|0	0|0	NA	1	1	1	JI1987 a allele, white as expected
JI3609	Hap5	0|0	0|0	NA	1	1	1	Cameor allele , a as expected
JI3610	Hap5	0|0	0|0	NA	1	1	1	Cameor allele , a as expected
JI3611	Hap5	0|0	0|0	NA	1	1	1	Cameor allele , a as expected
JI3614	Hap5	0|0	0|0	NA	1	1	1	Cameor allele , a as expected
Samson/JI3639	Hap5	0|0	0|0	NA	1	1	1	Cameor allele , a as expected
JI2110	Hap5	0|0	0|0	1	1	1	1	Cameor allele , a as expected
JI0090	Hap5	0|0	0|0	1	1	1	1	Cameor allele , a as expected
JI1018	Hap5	0|0	0|0	1	1	1	1	Cameor allele , a as expected
JI3027	Hap5	0|0	0|0	1	1	NA	1	Cameor allele , a as expected
JI0808	Hap5	0|0	0|0	1	1	1	1	Cameor allele , a as expected
JI0233	Hap5	0|0	0|0	2	2	2	2	JI0233 intragenic revertant
JI1967	Hap5	0|0	0|0	NA	2	2	2	unexplained
JI0127	Hap5	0|0	0|0	2	2	2	2	unexplained
JI2671	Hap5	0|0	0|0	NA	NA	NA	1	Cameor allele , a as expected
JI1825	Hap5	0|0	0|0	NA	NA	NA	1	Cameor allele , a as expected
JI1059	Hap5	0|0	0|0	NA	NA	NA	1	Cameor allele , a as expected
JI2389	Hap5	0|0	0|0	NA	NA	NA	1	Cameor allele , a as expected

## Sheet: Table S15, Lele
Supplementary Table 15. Internode length and the GA 3-oxidase1 gene haplotypes. Phenotypic characteristics and allelic variation for each accession is given.
sample	PH_Harbin_2022_Rep1	Haplotype ID assigned manually	chr5_639901919_A/G	PH_Harbin_2022_Rep2	PH_JIC_2020	PH_Shenzhen_2022
JI2110	57.7	Hap1	.|.	NA	65	39
FN1453/JI3635	25.3	Hap1	0|0	10	NA	46
JI0558	27	Hap1	0|0	25	40	30
JI1555	27	Hap1	0|0	33	45	47
FN2026_7/JI3636	27.7	Hap1	0|0	29	NA	65
JI0991	29	Hap1	0|0	43	82	NA
JI1774	29.7	Hap1	0|0	18	55	27
FN2076_5/JI3637	30.3	Hap1	0|0	25	NA	49
JI0930	30.7	Hap1	0|0	40	55	23
JI2822	32	Hap1	0|0	14	NA	56
JI1313	39	Hap1	0|0	45	72	52
JI2106	39.5	Hap1	0|0	19	55	36
JI0354	40	Hap1	0|0	18	75	33
JI0034	44.3	Hap1	0|0	48	45	42
JI0491	47.7	Hap1	0|0	44	55	53
JI0819	49	Hap1	0|0	63	75	84
JI0853	49.3	Hap1	0|0	52	NA	64
JI0340	49.7	Hap1	0|0	47	56	68
JI0424	50.3	Hap1	0|0	45	53	50
JI0441	50.7	Hap1	0|0	43	75	76
JI1246	51	Hap1	0|0	45	NA	58
JI1212	51.7	Hap1	0|0	59	70	112
JI0012	52.3	Hap1	0|0	40	35	65
JI1017	52.3	Hap1	0|0	60	NA	43
JI2434	52.7	Hap1	0|0	42	60	93
JI0584	53	Hap1	0|0	59	30	58
JI0318	53.3	Hap1	0|0	38	58	29
JI1231	54	Hap1	0|0	63	70	50
JI2782	55	Hap1	0|0	38	70	74
JI1423	56.3	Hap1	0|0	40	NA	85
JI0314	57	Hap1	0|0	53	66	43
JI0460	58	Hap1	0|0	48	NA	51
JI0257	58.3	Hap1	0|0	51	60	42
JI0814	58.3	Hap1	0|0	60	NA	66
JI0808	58.7	Hap1	0|0	64	48	55
JI1747	59	Hap1	0|0	56	65	102
JI2761	59.3	Hap1	0|0	38	70	77
JI0774	59.5	Hap1	0|0	63	60	52
JI0327	62.3	Hap1	0|0	69	60	85
JI0909	62.3	Hap1	0|0	80	66	49
JI2273	63.7	Hap1	0|0	34	30	71
JI1768	64.3	Hap1	0|0	37	70	76
JI0144	64.7	Hap1	0|0	25	40	43
JI0400	64.7	Hap1	0|0	60	60	71
JI1804	64.7	Hap1	0|0	43	45	90
JI0536	65	Hap1	0|0	54	NA	68
JI1227	65	Hap1	0|0	83	NA	106
JI0560	65.7	Hap1	0|0	91	70	80
JI3027	65.7	Hap1	0|0	36	120	66
JI2410	66.7	Hap1	0|0	42	37	96
JI0411	67	Hap1	0|0	62	80	97
JI0780	67	Hap1	0|0	80	65	65
JI0060	67.3	Hap1	0|0	64	52	83
JI2193	67.3	Hap1	0|0	52	40	73
JI1303	67.7	Hap1	0|0	70	82	80
JI0952	68.3	Hap1	0|0	53	90	83
JI0341	68.7	Hap1	0|0	46	NA	82
JI1200	68.7	Hap1	0|0	75	NA	73
JI1922	68.7	Hap1	0|0	93	40	95
JI2007	69	Hap1	0|0	58	65	90
JI1294	69.3	Hap1	0|0	73	70	101
JI0154	69.7	Hap1	0|0	58	70	63
JI0727	70.3	Hap1	0|0	62	80	86
JI0568	70.7	Hap1	0|0	61	NA	70
JI0423	71.3	Hap1	0|0	43	54	63
JI1748	72	Hap1	0|0	53	85	89
JI2221	72	Hap1	0|0	80	40	97
JI0402	72.3	Hap1	0|0	48	110	62
JI0406	72.7	Hap1	0|0	69	80	78
JI0474	74	Hap1	0|0	63	100	81
JI0607	74.7	Hap1	0|0	70	85	72
JI0582	77	Hap1	0|0	80	NA	78
JI2403	77	Hap1	0|0	51	NA	62
JI1014	77	Hap1	0|0	60	65	100
JI0389	77.3	Hap1	0|0	53	55	63
JI0409	78	Hap1	0|0	70	55	71
JI0717	78	Hap1	0|0	84	60	87
JI0496	78.3	Hap1	0|0	61	47	87
JI2321	78.3	Hap1	0|0	51	60	75
JI2436	78.7	Hap1	0|0	72	72	91
JI0428	79	Hap1	0|0	75	120	98
JI3029	79.3	Hap1	0|0	80	NA	116
JI0058	80	Hap1	0|0	81	75	NA
JI0657	80.7	Hap1	0|0	84	86	89
JI0361	81	Hap1	0|0	65	65	85
JI1775	81.3	Hap1	0|0	64	70	81
JI1210	81.7	Hap1	0|0	73	NA	123
JI3086	81.7	Hap1	0|0	33	NA	72
JI1205	82	Hap1	0|0	77	100	115
JI1762	82.7	Hap1	0|0	55	70	91
JI1791	82.7	Hap1	0|0	55	90	113
Baryton/JI3638	82.7	Hap1	0|0	75	NA	103
JI0506	83	Hap1	0|0	50	73	81
JI0813	83.7	Hap1	0|0	70	60	66
JI1737	84.3	Hap1	0|0	61	90	99
JI2294	84.7	Hap1	0|0	54	40	103
JI3614	84.7	Hap1	0|0	68	NA	118
JI2787	85	Hap1	0|0	60	80	114
JI0358	85.3	Hap1	0|0	79	76	111
JI2394	85.7	Hap1	0|0	58	NA	87
JI0745	86	Hap1	0|0	85	40	87
JI2017	86	Hap1	0|0	60	NA	84
JI0550	86.3	Hap1	0|0	90	NA	101
JI0554	86.3	Hap1	0|0	90	60	69
JI0877	86.3	Hap1	0|0	83	80	116
JI1386	86.7	Hap1	0|0	73	NA	112
JI2274	87.7	Hap1	0|0	32	80	87
JI2374	87.7	Hap1	0|0	52	50	88
JI0417	88	Hap1	0|0	93	55	85
JI2016	88.3	Hap1	0|0	83	75	85
JI0114	89	Hap1	0|0	74	60	77
JI0498	89	Hap1	0|0	83	NA	85
JI1863	89.3	Hap1	0|0	75	55	90
JI0420	89.7	Hap1	0|0	61	75	98
JI0298	90.7	Hap1	0|0	81	90	75
JI1222	90.7	Hap1	0|0	90	75	105
JI1272	90.7	Hap1	0|0	85	NA	107
JI1229	91	Hap1	0|0	80	60	81
JI2114	92	Hap1	0|0	70	75	105
JI1829	92.3	Hap1	0|0	75	84	65
JI3134	94.7	Hap1	0|0	78	NA	112
JI0430	95.3	Hap1	0|0	80	100	91
JI0854	99.3	Hap1	0|0	101	NA	114
JI0344	100.7	Hap1	0|0	80	72	90
JI0539	101.7	Hap1	0|0	113	120	82
JI0364	103.7	Hap1	0|0	98	70	100
JI0546	105	Hap1	0|0	100	90	116
JI0693	111.3	Hap1	0|0	100	85	81
JI2228	111.3	Hap1	0|0	92	40	103
JI0330	111.3	Hap1	0|0	74	93	123
JI2324	116.3	Hap1	0|0	103	50	134
JI2595	121	Hap1	0|0	83	NA	105
JI0025	123	Hap1	0|0	98	82	123
JI2174	125.3	Hap1	0|0	87	80	103
JI0019	183.7	Hap1	0|0	159	107	171
JI0134	NA	Hap1	0|0	142	70	198
JI0127	NA	Hap1	0|0	86	42	64
JI0128	NA	Hap1	0|0	72	46	NA
JI0131	NA	Hap1	0|0	55	50	54
JI0136	NA	Hap1	0|0	82	47	NA
JI0322	NA	Hap1	0|0	94	83	98
JI0323	NA	Hap1	0|0	46	63	56
JI0339	NA	Hap1	0|0	80	95	107
JI1817	NA	Hap1	0|0	80	60	95
JI1848	NA	Hap1	0|0	75	50	127
JI1865	NA	Hap1	0|0	98	65	NA
JI2296	NA	Hap1	0|0	55	70	75
JI2659	NA	Hap1	0|0	36	NA	45
JI2711	NA	Hap1	0|0	75	70	112
JI0047	45	Hap2	1|1	82	90	131
JI0180	46	Hap2	1|1	136	100	198
JI0188	55	Hap2	1|1	20	108	153
JI0467	62	Hap2	1|1	48	80	68
JI0007	64	Hap2	1|1	86	30	74
JI2240	96	Hap2	1|1	68	115	153
JI1147	101	Hap2	1|1	115	115	95
JI0531	104.3	Hap2	1|1	70	NA	68
JI1851	114	Hap2	1|1	120	90	NA
JI0185	123	Hap2	1|1	81	82	125
JI0466	125	Hap2	1|1	111	80	143
JI0718	127.7	Hap2	1|1	128	NA	110
JI2108	129	Hap2	1|1	91	145	111
JI1724	139.3	Hap2	1|1	121	90	172
JI0787	140.3	Hap2	1|1	153	90	137
JI3096	141	Hap2	1|1	106	95	127
JI0887	141	Hap2	1|1	112	110	202
JI3167	141.3	Hap2	1|1	90	NA	169
JI0020	143.3	Hap2	1|1	73	70	96
JI1434	147	Hap2	1|1	137	130	172
JI0124	148.5	Hap2	1|1	100	50	90
JI0184	150	Hap2	1|1	142	135	136
JI2603	150	Hap2	1|1	114	NA	149
JI0191	150.3	Hap2	1|1	176	124	144
JI1590	152.3	Hap2	1|1	133	130	193
JI1345	153.3	Hap2	1|1	163	76	172
JI3178	153.3	Hap2	1|1	139	NA	168
JI2233	155.7	Hap2	1|1	120	90	183
JI1996	156	Hap2	1|1	135	150	182
JI0356	158	Hap2	1|1	86	96	182
JI1995	158	Hap2	1|1	139	175	177
JI1722	160	Hap2	1|1	128	NA	181
JI2279	161	Hap2	1|1	159	75	191
JI0044	161.7	Hap2	1|1	131	115	182
JI1266	162.3	Hap2	1|1	145	115	168
JI0371	164.3	Hap2	1|1	147	130	165
JI1894	165	Hap2	1|1	152	160	196
JI1920	166	Hap2	1|1	138	125	NA
JI0233	166.7	Hap2	1|1	155	105	180
JI2061	166.7	Hap2	1|1	142	120	186
JI1055	167.7	Hap2	1|1	152	90	185
JI0220	168.3	Hap2	1|1	120	110	125
JI0240	168.3	Hap2	1|1	165	104	190
JI2243	169.7	Hap2	1|1	165	150	181
JI1971	171	Hap2	1|1	138	145	197
JI1366	171.3	Hap2	1|1	175	97	183
JI1084	172.3	Hap2	1|1	185	92	191
JI1626	173.7	Hap2	1|1	158	140	202
JI1793	173.7	Hap2	1|1	136	105	159
JI2104	174.3	Hap2	1|1	142	145	199
JI2344	174.3	Hap2	1|1	121	90	196
JI0162	174.7	Hap2	1|1	155	120	167
JI2223	177.3	Hap2	1|1	161	90	181
JI2611	177.3	Hap2	1|1	153	110	154
JI1071	177.7	Hap2	1|1	178	107	157
JI0794	178.7	Hap2	1|1	205	135	162
JI0050	181.7	Hap2	1|1	135	126	148
JI1625	181.7	Hap2	1|1	192	160	202
JI0146	182	Hap2	1|1	151	110	157
JI2300	182.7	Hap2	1|1	170	75	185
JI1933	183.3	Hap2	1|1	177	120	164
JI2217	183.3	Hap2	1|1	168	80	195
JI2150	184.7	Hap2	1|1	152	50	208
JI3179	185.3	Hap2	1|1	132	NA	189
JI2116	186	Hap2	1|1	132	100	177
JI0703	187	Hap2	1|1	186	125	177
JI1910	188.3	Hap2	1|1	133	125	186
JI2126	189	Hap2	1|1	163	90	196
JI2153	189.7	Hap2	1|1	183	80	193
JI1885	190.5	Hap2	1|1	168	140	140
JI1882	193.7	Hap2	1|1	132	165	210
JI1846	195.3	Hap2	1|1	141	130	NA
JI1706	196.3	Hap2	1|1	210	119	215
JI1850	196.5	Hap2	1|1	163	95	NA
JI1078	197	Hap2	1|1	182	113	175
JI2301	198.3	Hap2	1|1	182	NA	178
JI2058	201	Hap2	1|1	140	100	191
JI2649	201.3	Hap2	1|1	165	100	210
JI2084	201.7	Hap2	1|1	110	100	188
JI0174	203.3	Hap2	1|1	160	110	163
JI1679	205.3	Hap2	1|1	195	125	218
JI2236	206	Hap2	1|1	183	90	235
JI0133	206.7	Hap2	1|1	168	148	215
JI2647	207.3	Hap2	1|1	163	120	213
JI0368	209	Hap2	1|1	133	105	199
JI0021	212.7	Hap2	1|1	157	80	189
JI2277	212.7	Hap2	1|1	153	90	220
JI0167	214.7	Hap2	1|1	165	110	187
JI0015	240	Hap2	1|1	122	75	159
JI1041	243	Hap2	1|1	284	120	210
JI1224	250.7	Hap2	1|1	240	180	246
JI0806	260	Hap2	1|1	200	115	216
JI0014	NA	Hap2	1|1	190	155	215
JI0018	NA	Hap2	1|1	173	100	NA
JI0040	NA	Hap2	1|1	150	90	NA
JI0055	NA	Hap2	1|1	124	120	NA
JI0071	NA	Hap2	1|1	155	120	139
JI0116	NA	Hap2	1|1	143	110	157
JI0118	NA	Hap2	1|1	154	118	NA
JI0123	NA	Hap2	1|1	142	92	220
JI0150	NA	Hap2	1|1	166	110	NA
JI0205	NA	Hap2	1|1	135	102	153
JI0208	NA	Hap2	1|1	94	130	NA
JI0214	NA	Hap2	1|1	160	95	188
JI0228	NA	Hap2	1|1	161	115	179
JI0245	NA	Hap2	1|1	130	120	NA
JI0246	NA	Hap2	1|1	160	100	NA
JI0247	NA	Hap2	1|1	127	90	NA
JI0267	NA	Hap2	1|1	145	150	NA
JI0288	NA	Hap2	1|1	203	100	188
JI0295	NA	Hap2	1|1	143	93	NA
JI0378	NA	Hap2	1|1	114	115	127
JI0380	NA	Hap2	1|1	165	162	156
JI0692	NA	Hap2	1|1	200	120	205
JI0711	NA	Hap2	1|1	172	90	NA
JI0712	NA	Hap2	1|1	145	105	151
JI0734	NA	Hap2	1|1	176	107	163
JI0807	NA	Hap2	1|1	160	120	NA
JI0825	NA	Hap2	1|1	65	110	NA
JI0846	NA	Hap2	1|1	190	132	NA
JI1228	NA	Hap2	1|1	191	NA	NA
JI1307	NA	Hap2	1|1	200	90	NA
JI1398	NA	Hap2	1|1	174	120	NA
JI1524	NA	Hap2	1|1	141	64	NA
JI1535	NA	Hap2	1|1	102	130	153
JI1543	NA	Hap2	1|1	180	70	NA
JI1547	NA	Hap2	1|1	148	105	NA
JI1825	NA	Hap2	1|1	121	NA	NA
JI1870	NA	Hap2	1|1	160	125	201
JI1891	NA	Hap2	1|1	150	160	NA
JI1968	NA	Hap2	1|1	141	105	202
JI2048	NA	Hap2	1|1	150	100	NA
JI2156	NA	Hap2	1|1	143	110	143
JI2157	NA	Hap2	1|1	210	105	179
JI2311	NA	Hap2	1|1	202	80	221
JI2312	NA	Hap2	1|1	225	110	225
JI2348	NA	Hap2	1|1	152	90	NA
JI2423	NA	Hap2	1|1	145	NA	NA
JI2559	NA	Hap2	1|1	114	NA	114
JI2671	NA	Hap2	1|1	92	NA	100
JI2716	NA	Hap2	1|1	134	150	175
JI2776	NA	Hap2	1|1	104	150	130
JI3030	NA	Hap2	1|1	126	NA	182
JI3098	39.7	Hap3	1|1	30	90	58
JI1980	88	Hap3	1|1	71	90	138
JI1269	107.7	Hap3	1|1	135	71	143
JI0083	116	Hap3	1|1	137	90	125
JI0098	122.3	Hap3	1|1	90	85	140
JI1270	122.3	Hap3	1|1	133	78	137
JI1469	128	Hap3	1|1	105	140	181
JI1462	129	Hap3	1|1	142	135	197
JI2018	129.7	Hap3	1|1	68	100	163
JI1956	139	Hap3	1|1	121	100	208
JI1989	141	Hap3	1|1	132	145	178
JI1529	144.7	Hap3	1|1	159	110	189
JI0177	146	Hap3	1|1	138	110	142
JI2561	147.7	Hap3	1|1	112	NA	142
JI1585	151.3	Hap3	1|1	141	185	114
JI1477	152.7	Hap3	1|1	142	62	190
JI3022	154	Hap3	1|1	104	NA	123
JI1592	155.7	Hap3	1|1	131	103	180
JI1260	161	Hap3	1|1	131	110	142
JI1962	163	Hap3	1|1	142	115	191
JI2742	163.3	Hap3	1|1	124	120	192
JI1991	165	Hap3	1|1	164	115	189
JI1587	166.7	Hap3	1|1	138	135	158
JI0804	167.7	Hap3	1|1	85	112	168
JI1464	168.3	Hap3	1|1	163	110	228
JI2350	172.7	Hap3	1|1	129	70	173
JI0080	173.3	Hap3	1|1	145	95	131
JI2743	174.7	Hap3	1|1	129	80	165
JI0176	177.7	Hap3	1|1	98	110	188
JI0968	178	Hap3	1|1	201	110	184
JI1519	179.3	Hap3	1|1	133	120	179
JI1581	180	Hap3	1|1	73	100	183
JI1915	182	Hap3	1|1	145	130	234
JI0039	NA	Hap3	1|1	275	152	201
JI0085	NA	Hap3	1|1	80	95	NA
JI0086	NA	Hap3	1|1	45	50	108
JI0087	NA	Hap3	1|1	130	90	NA
JI0094	NA	Hap3	1|1	117	98	NA
JI0099	NA	Hap3	1|1	91	90	NA
JI0102	NA	Hap3	1|1	135	92	NA
JI0108	NA	Hap3	1|1	133	100	NA
JI0109	NA	Hap3	1|1	113	104	128
JI0181	NA	Hap3	1|1	67	85	112
JI0251	NA	Hap3	1|1	120	55	NA
JI0252	NA	Hap3	1|1	103	90	NA
JI0276	NA	Hap3	1|1	63	112	161
JI0705	NA	Hap3	1|1	157	120	NA
JI0716	NA	Hap3	1|1	140	125	126
JI0752	NA	Hap3	1|1	121	70	86
JI1117	NA	Hap3	1|1	112	65	NA
JI1121	NA	Hap3	1|1	199	72	169
JI1491	NA	Hap3	1|1	135	80	152
JI1539	NA	Hap3	1|1	135	95	NA
JI1578	NA	Hap3	1|1	130	145	129
JI1698	NA	Hap3	1|1	140	110	166
JI2345	NA	Hap3	1|1	131	NA	152
JI2429	NA	Hap3	1|1	107	NA	NA
JI3006	NA	Hap3	1|1	75	110	157
JI3080	NA	Hap3	1|1	101	90	151
JI0189	104.7	Hap4	1|1	83	72	136
JI0067	110.3	Hap4	1|1	105	121	131
JI0190	123.3	Hap4	1|1	103	110	126
JI0074	124.7	Hap4	1|1	128	116	147
JI1482	126.7	Hap4	1|1	110	122	149
JI0157	133.3	Hap4	1|1	107	87	116
JI1444	133.7	Hap4	1|1	140	120	222
JI0077	146.7	Hap4	1|1	121	88	137
JI1058	159	Hap4	1|1	161	80	147
JI2177	159	Hap4	1|1	125	140	149
JI0028	162.3	Hap4	1|1	138	120	115
JI0735	164.3	Hap4	1|1	146	105	152
JI0616	165.3	Hap4	1|1	189	100	182
JI3119	165.7	Hap4	1|1	152	130	165
JI2152	168.3	Hap4	1|1	167	110	139
JI1834	172	Hap4	1|1	150	135	157
JI1835	172	Hap4	1|1	140	130	181
JI1911	178.7	Hap4	1|1	170	75	212
JI1900	184	Hap4	1|1	160	190	194
JI1125	186.7	Hap4	1|1	220	120	200
JI2648	188.3	Hap4	1|1	145	110	194
JI1132	200	Hap4	1|1	210	130	179
JI2149	218.7	Hap4	1|1	180	90	211
JI2129	240	Hap4	1|1	194	80	246
JI0782	NA	Hap4	1|1	134	95	134
JI1082	NA	Hap4	1|1	180	115	200
JI1086	NA	Hap4	1|1	153	70	NA
JI1344	NA	Hap4	1|1	173	85	181
JI1486	NA	Hap4	1|1	182	47	194
JI1528	NA	Hap4	1|1	125	91	NA
JI1837	NA	Hap4	1|1	115	130	136
JI2083	NA	Hap4	1|1	105	65	NA
JI2105	NA	Hap4	1|1	153	110	NA
JI2548	NA	Hap4	1|1	102	NA	118
JI2583	NA	Hap4	1|1	165	NA	192
JI2707	NA	Hap4	1|1	175	80	NA
JI3049	NA	Hap4	1|1	131	90	78
JI3025	NA	Hap4	1|1	64	80	NA
JI0149	96.7	Hap5	1|1	125	110	97
JI0079	106	Hap5	1|1	94	90	90
JI0893	120	Hap5	1|1	105	108	161
JI0084	125.3	Hap5	1|1	115	115	121
JI0653	127	Hap5	1|1	147	135	168
JI0037	138	Hap5	1|1	133	150	116
JI1538	139	Hap5	1|1	168	140	204
JI1713	139	Hap5	1|1	169	NA	186
JI2699	143.3	Hap5	1|1	65	100	174
JI0892	143.7	Hap5	1|1	132	87	160
JI0216	146.7	Hap5	1|1	150	95	160
JI1453	147.3	Hap5	1|1	130	110	184
JI1636	151.7	Hap5	1|1	153	145	201
JI0148	153.3	Hap5	1|1	120	110	175
JI2182	153.3	Hap5	1|1	142	140	185
JI0303	154.7	Hap5	1|1	145	140	167
JI1043	154.7	Hap5	1|1	131	122	164
JI0237	155	Hap5	1|1	155	140	188
JI0089	155.3	Hap5	1|1	110	120	147
JI1407	156	Hap5	1|1	183	NA	202
JI1165	156.3	Hap5	1|1	166	160	173
JI1720	161	Hap5	1|1	153	NA	155
JI1732	163	Hap5	1|1	150	NA	191
JI0006	163.3	Hap5	1|1	161	170	141
JI0062	163.3	Hap5	1|1	133	170	185
JI0965	163.7	Hap5	1|1	148	NA	182
JI1607	163.7	Hap5	1|1	143	165	148
JI1548	164.7	Hap5	1|1	140	105	165
JI0974	165	Hap5	1|1	40	NA	169
JI0275	166.3	Hap5	1|1	142	NA	156
JI1173	169.7	Hap5	1|1	200	90	192
JI2757	171	Hap5	1|1	121	90	136
JI2257	173	Hap5	1|1	180	130	182
JI1948	174	Hap5	1|1	158	160	213
JI1981	174	Hap5	1|1	148	180	181
JI1663	176	Hap5	1|1	167	145	172
JI0695	179.3	Hap5	1|1	170	120	184
JI1721	179.3	Hap5	1|1	138	NA	158
JI2644	180.7	Hap5	1|1	163	145	196
JI1733	185	Hap5	1|1	108	NA	180
JI1919	190	Hap5	1|1	178	130	190
JI3186	190.3	Hap5	1|1	128	NA	203
JI1967	193.3	Hap5	1|1	162	130	200
JI2134	196.3	Hap5	1|1	140	95	202
JI0270	196.7	Hap5	1|1	159	104	193
JI0701	199	Hap5	1|1	181	120	189
JI0090	222.3	Hap5	1|1	182	140	212
JI0250	NA	Hap5	1|1	120	89	167
JI1704	NA	Hap5	1|1	142	NA	132
JI1705	NA	Hap5	1|1	115	NA	138
JI0024	NA	Hap5	1|1	151	97	NA
JI0120	NA	Hap5	1|1	200	130	182
JI0132	NA	Hap5	1|1	140	95	145
JI0147	NA	Hap5	1|1	65	140	115
JI0152	NA	Hap5	1|1	165	110	190
JI0209	NA	Hap5	1|1	132	60	168
JI0699	NA	Hap5	1|1	161	90	NA
JI0799	NA	Hap5	1|1	125	135	134
JI1085	NA	Hap5	1|1	160	110	181
JI1542	NA	Hap5	1|1	96	80	164
JI1699	NA	Hap5	1|1	148	NA	157
JI1702	NA	Hap5	1|1	142	NA	NA
JI2089	NA	Hap5	1|1	144	119	192
JI2154	NA	Hap5	1|1	190	70	223
JI2693	NA	Hap5	1|1	110	90	175
JI0950	NA	NA, not PS	1|1	NA	120	172
JI0048	NA	NA, not PS	1|1	NA	125	136
JI2331	153.7	NA, not PS	1|1	153.7	60	164
JI0795	247	NA, not PS	1|1	247	100	158
JI0391	101	NA, not PS	1|1	101	94	80
JI3604	NA	NA, not PS	0|0	NA	NA	NA
JI1088	114	NA, not PS	1|1	114	70	142
JI0138	26.7	NA, not PS	1|1	26.7	40	42
JI3148	NA	NA, not PS	1|1	NA	90	NA
JI1087	NA	NA, not PS	1|1	NA	NA	111
JI0268	124	NA, not PS	0|1	124	96	156
JI2764	131	NA, not PS	1|1	131	20	55
JI2753	142.3	NA, not PS	1|1	142.3	110	118
JI0932	113.7	NA, not PS	1|1	113.7	110	99
JI2695	NA	NA, not PS	1|1	NA	90	NA
JI3610	70.7	NA, not PS	0|0	70.7	NA	101
JI1573	48.3	NA, not PS	0|0	48.3	60	61
JI0800	144	NA, not PS	1|1	144	110	132
JI0221	161.3	NA, not PS	1|1	161.3	115	164
JI3611	77.7	NA, not PS	0|0	77.7	NA	97
JI3609	90	NA, not PS	0|0	90	NA	127
JI2623	95	NA, not PS	0|0	95	70	135
JI3605	78.3	NA, not PS	0|0	78.3	75	105
JI1714	NA	NA, not PS	1|1	NA	NA	NA
JI0566	86.3	NA, not PS	0|0	86.3	60	27
JI1002	129.7	NA, not PS	1|1	129.7	205	135
JI1217	NA	NA, not PS	0|0	NA	60	NA
JI0200	NA	NA, not PS	1|1	NA	90	NA
JI1219	77	NA, not PS	0|0	77	NA	94
JI1816	80	NA, not PS	0|0	80	65	93
JI1735	74	NA, not PS	1|1	74	NA	116
JI0820	80.5	NA, not PS	0|0	80.5	65	71
JI1129	NA	NA, not PS	1|1	NA	100	192
JI0949	160.7	NA, not PS	1|1	160.7	115	161
JI1492	160.3	NA, not PS	1|1	160.3	56	169
JI0863	147	NA, not PS	1|1	147	100	191
JI1503	NA	NA, not PS	1|1	NA	90	137
JI1669	194.7	NA, not PS	1|1	194.7	170	191
JI2332	134	NA, not PS	1|1	134	80	147
JI0057	170	NA, not PS	1|1	170	150	136
JI1792	171.3	NA, not PS	1|1	171.3	70	187
JI3163	NA	NA, not PS	1|1	NA	NA	NA
JI2353	201	NA, not PS	1|1	201	100	184
JI0125	138.3	NA, not PS	1|1	138.3	115	147
JI0957	109.3	NA, not PS	0|0	109.3	88	121
JI2314	44.7	NA, not PS	0|0	44.7	10	NA
JI0222	169	NA, not PS	1|1	169	125	172
JI2036	55.7	NA, not PS	0|0	55.7	60	66
JI1187	86.7	NA, not PS	0|0	86.7	NA	103
JI1800	59.7	NA, not PS	0|0	59.7	65	72
JI1718	93	NA, not PS	0|0	93	NA	95
JI3151	NA	NA, not PS	1|1	NA	95	NA
JI3150	NA	NA, not PS	1|1	NA	90	NA
JI3511	NA	NA, not PS	1|1	NA	NA	NA
JI2629	NA	NA, not PS	1|1	NA	NA	NA
JI2201	NA	NA, not PS	1|1	NA	80	NA
JI0635	NA	NA, not PS	1|1	NA	150	NA
JI2001	167.3	NA, not PS	1|1	167.3	150	217
JI0971	165.3	NA, not PS	1|1	165.3	NA	192
JI1703	NA	NA, not PS	1|1	NA	140	162
JI0175	190	NA, not PS	1|1	190	100	189
JI0516	74	NA, not PS	0|0	74	90	61
JI1523	NA	NA, not PS	1|1	NA	110	188
JI1652	154.7	NA, not PS	1|1	154.7	160	211
JI2329	78.7	NA, not PS	0|0	78.7	40	98
Samson/JI3639	204.3	NA, not PS	0|0	204.3	NA	240
JI0955	148	NA, not PS	1|1	148	110	179
JI0817	62.7	NA, not PS	0|0	62.7	38	76
JI1577	182.7	NA, not PS	1|1	182.7	130	152
JI0681	58	NA, not PS	0|0	58	91	48
JI0342	90.7	NA, not PS	0|0	90.7	80	108
JI2366	64	NA, not PS	0|0	64	40	72
JI0859	54.3	NA, not PS	0|0	54.3	NA	47
JI0781	46.7	NA, not PS	0|0	46.7	75	29
JI3053	61.3	NA, not PS	0|0	61.3	NA	52
JI2115	172.3	NA, not PS	1|1	172.3	110	149
JI1059	NA	NA, not PS	1|1	NA	NA	NA
JI0754	NA	NA, not PS	1|1	NA	40	NA
JI2355	NA	NA, not PS	1|1	NA	75	NA
JI1089	NA	NA, not PS	1|1	NA	95	146
JI1109	NA	NA, not PS	1|1	NA	53	NA
JI0241	NA	NA, not PS	1|1	NA	112	NA
JI2349	159.3	NA, not PS	1|1	159.3	90	194
JI1261	102.3	NA, not PS	1|1	102.3	85	75
JI3162	NA	NA, not PS	1|1	NA	90	NA
JI1854	NA	NA, not PS	1|1	NA	125	NA
JI3147	NA	NA, not PS	1|1	NA	NA	NA
JI0261	NA	NA, not PS	1|1	NA	100	NA
JI2698	NA	NA, not PS	1|1	NA	65	NA
JI2055	NA	NA, not PS	1|1	NA	142	NA
JI0249	NA	NA, not PS	1|1	NA	95	NA
JI1091	NA	NA, not PS	1|1	NA	74	127
JI1094	NA	NA, not PS	1|1	NA	110	NA
JI1093	NA	NA, not PS	1|1	NA	100	NA
JI3553	NA	NA, not PS	1|1	NA	NA	NA
JI1092	NA	NA, not PS	1|1	NA	84	NA
JI3558	NA	NA, not PS	1|1	NA	NA	NA
JI1095	NA	NA, not PS	1|1	NA	80	NA
JI3155	NA	NA, not PS	1|1	NA	110	NA
JI1074	NA	NA, not PS	1|1	NA	108	NA
JI2724	NA	NA, not PS	1|1	NA	NA	NA
JI0262	NA	NA, not PS	1|1	NA	115	NA
JI3263	NA	NA, not PS	1|1	NA	NA	NA
JI0064	NA	NA, not PS	1|1	NA	120	NA
JI1795	NA	NA, not PS	1|1	NA	100	NA
JI3159	NA	NA, not PS	1|1	NA	NA	NA
JI3158	NA	NA, not PS	1|1	NA	NA	NA
JI1075	NA	NA, not PS	1|1	NA	115	NA
JI3276	NA	NA, not PS	1|1	NA	NA	NA
JI1794	NA	NA, not PS	1|1	NA	70	NA
JI2538	NA	NA, not PS	1|1	NA	NA	NA
JI3157	NA	NA, not PS	1|1	NA	NA	NA
JI3156	NA	NA, not PS	1|1	NA	NA	NA
JI1035	NA	NA, not PS	1|1	NA	120	187
JI3153	NA	NA, not PS	1|1	NA	60	NA
JI1796	NA	NA, not PS	1|1	NA	90	NA
JI1010	NA	NA, not PS	1|1	NA	80	NA
JI2544	NA	NA, not PS	1|1	NA	NA	NA
JI2517	NA	NA, not PS	1|1	NA	NA	NA
JI2530	NA	NA, not PS	1|1	NA	NA	NA
JI2473	NA	NA, not PS	1|1	NA	NA	NA
JI0224	NA	NA, not PS	1|1	NA	40	NA
JI0255	NA	NA, not PS	1|1	NA	60	97
JI0002	51	NA, not PS	1|1	51	55	88
JI2202	91.3	NA, not PS	1|1	91.3	40	89
JI2385	57	NA, not PS	1|1	57	60	85
JI3557	NA	NA, not PS	1|1	NA	NA	NA
JI1096	NA	NA, not PS	1|1	NA	68	NA
JI3274	NA	NA, not PS	1|1	NA	NA	NA
JI3273	NA	NA, not PS	1|1	NA	NA	NA
JI3149	NA	NA, not PS	1|1	NA	100	NA
JI3275	NA	NA, not PS	1|1	NA	NA	NA
JI2523	NA	NA, not PS	1|1	NA	NA	NA
JI2206	NA	NA, not PS	1|1	NA	50	NA
JI2519	NA	NA, not PS	1|1	NA	NA	NA
JI1006	NA	NA, not PS	1|1	NA	60	NA
JI2074	NA	NA, not PS	1|1	NA	130	NA
JI0199	NA	NA, not PS	1|1	NA	110	163
JI0198	NA	NA, not PS	1|1	NA	145	NA
JI0714	NA	NA, not PS	1|1	NA	130	NA
JI3271	NA	NA, not PS	1|1	NA	NA	162
JI1268	106	NA, not PS	1|1	106	72	130
JI0223	NA	NA, not PS	1|1	NA	126	193
JI0328	129.7	NA, not PS	1|1	129.7	86	138
JI0035	82	NA, not PS	1|1	82	120	85
JI0066	NA	NA, not PS	1|1	NA	125	150
JI0069	NA	NA, not PS	1|1	NA	131	NA
JI0145	64	NA, not PS	1|1	64	80	48
JI0151	142	NA, not PS	1|1	142	120	191
JI0166	NA	NA, not PS	1|1	NA	120	181
JI0172	179	NA, not PS	1|1	179	110	160
JI0301	174.3	NA, not PS	1|1	174.3	180	189
JI0305	NA	NA, not PS	0|0	NA	50	NA
JI0329	119.3	NA, not PS	1|1	119.3	140	67
JI0399	45	NA, not PS	0|0	45	70	27
JI0574	67.7	NA, not PS	0|0	67.7	40	79
JI0651	63.7	NA, not PS	1|1	63.7	120	59
JI0837	126.3	NA, not PS	1|1	126.3	155	135
JI1245	185.3	NA, not PS	1|1	185.3	107	220
JI1263	163.7	NA, not PS	1|1	163.7	120	157
JI1265	142	NA, not PS	1|1	142	110	149
JI1395	174.7	NA, not PS	1|1	174.7	NA	166
JI1588	149.7	NA, not PS	1|1	149.7	110	130
JI1639	183.3	NA, not PS	1|1	183.3	140	211
JI1707	NA	NA, not PS	1|1	NA	NA	NA
JI1946	197	NA, not PS	1|1	197	140	202
JI1947	184.3	NA, not PS	1|1	184.3	165	198
JI1985	191.7	NA, not PS	1|1	191.7	130	176
JI2100	NA	NA, not PS	0|0	NA	65	NA
JI2389	72.3	NA, not PS	0|0	72.3	NA	78
JI2683	157.7	NA, not PS	1|1	157.7	NA	167
JI0884	57	NA, not PS	0|0	57	55	68
JI1921	NA	NA, not PS	1|1	NA	155	205
JI1822	NA	NA, not PS	0|0	NA	65	84
JI0022	110	NA, not PS	0|0	110	40	90
JI0033	99	NA, not PS	0|0	99	90	72
JI0043	128.3	NA, not PS	1|1	128.3	103	100
JI0046	96	NA, not PS	0|0	96	58	68
JI0061	NA	NA, not PS	0|0	NA	35	81
JI0072	50.3	NA, not PS	0|0	50.3	61	74
JI0073	NA	NA, not PS	0|0	NA	51	NA
JI0082	135.3	NA, not PS	1|1	135.3	93	156
JI0122	87.7	NA, not PS	0|0	87.7	91	81
JI0304	193.3	NA, not PS	1|1	193.3	153	200
JI0319	72	NA, not PS	0|0	72	65	90
JI0383	NA	NA, not PS	0|0	NA	84	65
JI0434	66	NA, not PS	0|0	66	80	87
JI0504	90.3	NA, not PS	0|0	90.3	80	64
JI0571	50.3	NA, not PS	0|0	50.3	65	19
JI0573	NA	NA, not PS	0|0	NA	NA	49
JI0614	104.7	NA, not PS	0|0	104.7	85	110
JI0662	94.3	NA, not PS	0|0	94.3	50	33
JI0665	84.7	NA, not PS	0|0	84.7	130	99
JI0670	111.7	NA, not PS	1|1	111.7	135	152
JI0720	81	NA, not PS	1|1	81	130	54
JI0721	58.7	NA, not PS	0|0	58.7	NA	56
JI0737	76	NA, not PS	0|0	76	60	101
JI0738	NA	NA, not PS	0|0	NA	60	NA
JI0746	78.3	NA, not PS	0|0	78.3	55	79
JI0790	56	NA, not PS	0|0	56	NA	69
JI0815	64.3	NA, not PS	0|0	64.3	50	74
JI0829	138	NA, not PS	1|1	138	135	122
JI0832	192.3	NA, not PS	1|1	192.3	130	131
JI0841	NA	NA, not PS	0|0	NA	80	NA
JI0844	NA	NA, not PS	0|0	NA	45	NA
JI0907	88.7	NA, not PS	1|1	88.7	82	133
JI0935	85	NA, not PS	0|0	85	97	106
JI1018	NA	NA, not PS	0|0	NA	75	NA
JI1128	220.3	NA, not PS	1|1	220.3	145	203
JI1179	48.5	NA, not PS	0|0	48.5	52	60
JI1194	87.3	NA, not PS	0|0	87.3	85	94
JI1201	55.7	NA, not PS	0|0	55.7	50	78
JI1214	68.3	NA, not PS	0|0	68.3	77	133
JI1237	49	NA, not PS	0|0	49	75	55
JI1277	84.3	NA, not PS	0|0	84.3	95	82
JI1280	67.3	NA, not PS	0|0	67.3	58	88
JI1282	74.3	NA, not PS	0|0	74.3	102	117
JI1562	71	NA, not PS	0|0	71	80	NA
JI1569	67.3	NA, not PS	0|0	67.3	85	81
JI1772	NA	NA, not PS	0|0	NA	90	103
JI2081	NA	NA, not PS	0|1	NA	135	NA
JI2219	81.7	NA, not PS	0|0	81.7	40	110
JI2262	122.7	NA, not PS	0|0	122.7	70	149
JI2317	34.5	NA, not PS	0|0	34.5	30	46
JI2393	99	NA, not PS	0|0	99	NA	NA
JI2401	67.3	NA, not PS	0|0	67.3	NA	NA
JI2402	57.3	NA, not PS	0|0	57.3	NA	26
JI2464	77.7	NA, not PS	0|0	77.7	96	95
JI2500	68.7	NA, not PS	0|0	68.7	NA	198
JI2501	56.3	NA, not PS	0|0	56.3	25	71
JI0335	123	NA, not PS	1|1	123	80	191
JI0870	203	NA, not PS	1|1	203	140	224
JI0874	70.7	NA, not PS	1|1	70.7	112	171
JI2371	76.7	NA, not PS	0|0	76.7	NA	101
JI0026	69	NA, not PS	0|0	69	41	56
JI0210	69	NA, not PS	0|0	69	90	65
JI0362	39.3	NA, not PS	0|0	39.3	60	33
JI0369	71.3	NA, not PS	0|0	71.3	61	56
JI0757	85.7	NA, not PS	0|0	85.7	88	86
JI0958	155.5	NA, not PS	0|0	155.5	50	172
JI1575	64.3	NA, not PS	0|0	64.3	40	68
JI2160	83.3	NA, not PS	0|0	83.3	20	64
JI3120	86.3	NA, not PS	0|0	86.3	85	NA

## Sheet: Table S16, Gpgp
Supplementary Table 16. Green vs. Yellow pod colours and the 100kb deletion event. Phenotypic characteristics associated with the 105kb deletion event for each accession is given.
IID	PodCol_Final_2024_Merge	ca. 100kb deletion event (chr3:324,692,139-324,798,134 , ZW6)	haplotype of candidate region(chr3:324-325Mb)
JI0064	Green	DeletionAbsent	1
JI0198	Green	DeletionAbsent	1
JI0199	Green	DeletionAbsent	1
JI0255	Green	DeletionAbsent	1
JI0261	Green	DeletionAbsent	1
JI0262	Green	DeletionAbsent	1
JI0714	Green	DeletionAbsent	1
JI0800	Green	DeletionAbsent	1
JI0950	Green	DeletionAbsent	2
JI1074	Green	DeletionAbsent	1
JI1075	Green	DeletionAbsent	1
JI1087	Green	DeletionAbsent	1
JI1088	Green	DeletionAbsent	1
JI1089	Green	DeletionAbsent	1
JI1091	Green	DeletionAbsent	1
JI1092	Green	DeletionAbsent	1
JI1093	Green	DeletionAbsent	1
JI1094	Green	DeletionAbsent	1
JI1095	Green	DeletionAbsent	1
JI1096	Green	DeletionAbsent	1
JI1703	Green	DeletionAbsent	1
JI1795	Green	DeletionAbsent	1
JI2055	Green	DeletionAbsent	1
JI2074	Green	DeletionAbsent	1
JI2115	Green	DeletionAbsent	2
JI2201	Green	DeletionAbsent	1
JI2629	Green	DeletionAbsent	1
JI2695	Green	DeletionAbsent	1
JI2724	Green	DeletionAbsent	1
JI3148	Green	DeletionAbsent	1
JI3149	Green	DeletionAbsent	1
JI3150	Green	DeletionAbsent	1
JI3151	Green	DeletionAbsent	1
JI3153	Green	DeletionAbsent	1
JI3155	Green	DeletionAbsent	1
JI3156	Green	DeletionAbsent	1
JI3157	Green	DeletionAbsent	1
JI3158	Green	DeletionAbsent	1
JI3159	Green	DeletionAbsent	1
JI3162	Green	DeletionAbsent	1
JI3163	Green	DeletionAbsent	1
JI3263	Green	DeletionAbsent	1
JI3271	Green	DeletionAbsent	1
JI3273	Green	DeletionAbsent	1
JI3274	Green	DeletionAbsent	1
JI3275	Green	DeletionAbsent	1
JI3276	Green	DeletionAbsent	1
JI3511	Green	DeletionAbsent	1
JI3553	Green	DeletionAbsent	1
JI3557	Green	DeletionAbsent	1
JI3558	Green	DeletionAbsent	1
JI0224	Green	DeletionAbsent	1
JI1006	Green	DeletionAbsent	1
JI1010	Green	DeletionAbsent	1
JI1796	Green	DeletionAbsent	1
JI2206	Green	DeletionAbsent	1
JI2517	Green	DeletionAbsent	1
JI2519	Green	DeletionAbsent	1
JI2523	Green	DeletionAbsent	1
JI2530	Green	DeletionAbsent	1
JI2544	Green	DeletionAbsent	1
JI2473	Green	DeletionAbsent	1
JI0241	Green	DeletionAbsent	1
JI1794	Green	DeletionAbsent	1
JI1854	Green	DeletionAbsent	1
JI2698	Green	DeletionAbsent	1
JI0250	Green	DeletionAbsent	2
JI1704	Green	DeletionAbsent	2
JI1705	Green	DeletionAbsent	2
JI0002	Green	DeletionAbsent	1
JI0006	Green	DeletionAbsent	1
JI0007	Green	DeletionAbsent	2
JI0012	Green	DeletionAbsent	1
JI0014	Green	DeletionAbsent	1
JI0015	Yellow	DeletionPresent	3
JI0018	Green	DeletionAbsent	2
JI0019	Green	DeletionAbsent	2
JI0020	Green	DeletionAbsent	2
JI0021	Green	DeletionAbsent	1
JI0022	Green	DeletionAbsent	1
JI0024	Green	DeletionAbsent	1
JI0025	Green	DeletionAbsent	2
JI0026	Green	DeletionAbsent	2
JI0028	Green	DeletionAbsent	1
JI0033	Green	DeletionAbsent	1
JI0034	Green	DeletionAbsent	2
JI0035	Green	DeletionAbsent	2
JI0037	Green	DeletionAbsent	2
JI0039	Green	DeletionAbsent	2
JI0040	Green	DeletionAbsent	1
JI0043	Green	DeletionAbsent	2
JI0044	Green	DeletionAbsent	2
JI0046	Yellow	DeletionPresent	3
JI0047	Green	DeletionAbsent	2
JI0048	Yellow	DeletionPresent	3
JI0050	Green	DeletionAbsent	1
JI0055	Green	DeletionAbsent	1
JI0057	Green	DeletionAbsent	2
JI0058	Yellow	DeletionPresent	3
JI0060	Green	DeletionAbsent	2
JI0061	Green	DeletionAbsent	2
JI0062	Green	DeletionAbsent	2
JI0066	Green	DeletionAbsent	2
JI0067	Green	DeletionAbsent	1
JI0069	Green	DeletionAbsent	2
JI0071	Green	DeletionAbsent	1
JI0072	Green	DeletionAbsent	2
JI0073	Yellow	DeletionPresent	3
JI0074	Green	DeletionAbsent	1
JI0077	Green	DeletionAbsent	1
JI0079	Green	DeletionAbsent	2
JI0080	Green	DeletionAbsent	1
JI0082	Green	DeletionAbsent	1
JI0083	Green	DeletionAbsent	2
JI0084	Green	DeletionAbsent	2
JI0085	Green	DeletionAbsent	1
JI0086	Green	DeletionAbsent	1
JI0087	Green	DeletionAbsent	1
JI0089	Green	DeletionAbsent	2
JI0090	Green	DeletionAbsent	2
JI0094	Green	DeletionAbsent	1
JI0098	Green	DeletionAbsent	1
JI0099	Green	DeletionAbsent	1
JI0102	Green	DeletionAbsent	1
JI0108	Green	DeletionAbsent	1
JI0109	Green	DeletionAbsent	1
JI0114	Green	DeletionAbsent	2
JI0116	Green	DeletionAbsent	2
JI0118	Green	DeletionAbsent	1
JI0120	Green	DeletionAbsent	1
JI0122	Green	DeletionAbsent	2
JI0123	Green	DeletionAbsent	1
JI0124	Green	DeletionAbsent	2
JI0125	Green	DeletionAbsent	1
JI0127	Green	DeletionAbsent	2
JI0128	Yellow	DeletionPresent	3
JI0131	Green	DeletionAbsent	2
JI0132	Yellow	DeletionPresent	3
JI0133	Green	DeletionAbsent	1
JI0134	Green	DeletionAbsent	2
JI0136	Yellow	DeletionPresent	3
JI0138	Green	DeletionAbsent	2
JI0144	Green	DeletionAbsent	2
JI0145	Green	DeletionAbsent	2
JI0146	Green	DeletionAbsent	1
JI0147	Green	DeletionAbsent	2
JI0148	Green	DeletionAbsent	2
JI0149	Green	DeletionAbsent	2
JI0150	Green	DeletionAbsent	2
JI0151	Green	DeletionAbsent	2
JI0152	Green	DeletionAbsent	1
JI0154	Green	DeletionAbsent	2
JI0157	Green	DeletionAbsent	1
JI0162	Green	DeletionAbsent	2
JI0166	Green	DeletionAbsent	2
JI0167	Green	DeletionAbsent	2
JI0172	Green	DeletionAbsent	1
JI0174	Green	DeletionAbsent	1
JI0175	Green	DeletionAbsent	1
JI0176	Green	DeletionAbsent	1
JI0177	Green	DeletionAbsent	1
JI0180	Green	DeletionAbsent	2
JI0181	Green	DeletionAbsent	1
JI0184	Green	DeletionAbsent	2
JI0185	Green	DeletionAbsent	1
JI0188	Green	DeletionAbsent	2
JI0189	Green	DeletionAbsent	1
JI0190	Green	DeletionAbsent	1
JI0191	Green	DeletionAbsent	2
JI0200	Green	DeletionAbsent	2
JI0205	Green	DeletionAbsent	1
JI0208	Green	DeletionAbsent	2
JI0209	Green	DeletionAbsent	2
JI0210	Green	DeletionAbsent	2
JI0214	Green	DeletionAbsent	1
JI0216	Green	DeletionAbsent	1
JI0220	Green	DeletionAbsent	1
JI0221	Green	DeletionAbsent	1
JI0222	Green	DeletionAbsent	1
JI0223	Green	DeletionAbsent	1
JI0228	Green	DeletionAbsent	1
JI0233	Green	DeletionAbsent	1
JI0237	Green	DeletionAbsent	2
JI0240	Green	DeletionAbsent	2
JI0245	Green	DeletionAbsent	1
JI0246	Green	DeletionAbsent	1
JI0247	Green	DeletionAbsent	1
JI0251	Green	DeletionAbsent	1
JI0252	Green	DeletionAbsent	1
JI0257	Green	DeletionAbsent	2
JI0267	Green	DeletionAbsent	1
JI0268	Green	DeletionAbsent	1
JI0270	Green	DeletionAbsent	1
JI0275	Green	DeletionAbsent	1
JI0276	Green	DeletionAbsent	1
JI0288	Green	DeletionAbsent	1
JI0295	Green	DeletionAbsent	1
JI0298	Green	DeletionAbsent	2
JI0301	Green	DeletionAbsent	2
JI0303	Green	DeletionAbsent	2
JI0304	Green	DeletionAbsent	2
JI0305	Green	DeletionAbsent	2
JI0314	Green	DeletionAbsent	2
JI0318	Green	DeletionAbsent	2
JI0319	Green	DeletionAbsent	2
JI0322	Green	DeletionAbsent	2
JI0323	Green	DeletionAbsent	2
JI0327	Green	DeletionAbsent	2
JI0328	Green	DeletionAbsent	1
JI0329	Green	DeletionAbsent	2
JI0339	Green	DeletionAbsent	1
JI0340	Green	DeletionAbsent	2
JI0341	Green	DeletionAbsent	2
JI0342	Green	DeletionAbsent	1
JI0344	Green	DeletionAbsent	2
JI0354	Green	DeletionAbsent	2
JI0356	Green	DeletionAbsent	2
JI0358	Green	DeletionAbsent	2
JI0361	Green	DeletionAbsent	2
JI0362	Green	DeletionAbsent	2
JI0364	Green	DeletionAbsent	2
JI0368	Green	DeletionAbsent	2
JI0369	Green	DeletionAbsent	2
JI0371	Green	DeletionAbsent	1
JI0378	Green	DeletionAbsent	2
JI0380	Green	DeletionAbsent	1
JI0383	Green	DeletionAbsent	1
JI0389	Green	DeletionAbsent	2
JI0391	Green	DeletionAbsent	2
JI0399	Green	DeletionAbsent	2
JI0400	Green	DeletionAbsent	2
JI0402	Green	DeletionAbsent	2
JI0406	Green	DeletionAbsent	2
JI0409	Green	DeletionAbsent	2
JI0411	Green	DeletionAbsent	2
JI0417	Green	DeletionAbsent	2
JI0420	Green	DeletionAbsent	2
JI0423	Green	DeletionAbsent	2
JI0424	Green	DeletionAbsent	2
JI0428	Green	DeletionAbsent	2
JI0430	Green	DeletionAbsent	2
JI0434	Green	DeletionAbsent	2
JI0441	Green	DeletionAbsent	2
JI0460	Green	DeletionAbsent	2
JI0466	Green	DeletionAbsent	2
JI0467	Green	DeletionAbsent	2
JI0474	Green	DeletionAbsent	2
JI0491	Green	DeletionAbsent	2
JI0496	Green	DeletionAbsent	2
JI0498	Green	DeletionAbsent	2
JI0504	Green	DeletionAbsent	2
JI0506	Green	DeletionAbsent	2
JI0516	Green	DeletionAbsent	2
JI0531	Green	DeletionAbsent	2
JI0536	Green	DeletionAbsent	2
JI0539	Green	DeletionAbsent	2
JI0546	Green	DeletionAbsent	2
JI0550	Green	DeletionAbsent	2
JI0554	Green	DeletionAbsent	2
JI0558	Green	DeletionAbsent	1
JI0560	Green	DeletionAbsent	2
JI0566	Green	DeletionAbsent	2
JI0568	Green	DeletionAbsent	2
JI0571	Green	DeletionAbsent	2
JI0573	Green	DeletionAbsent	2
JI0574	Green	DeletionAbsent	2
JI0582	Green	DeletionAbsent	2
JI0584	Green	DeletionAbsent	2
JI0607	Green	DeletionAbsent	2
JI0614	Green	DeletionAbsent	2
JI0616	Green	DeletionAbsent	1
JI0635	Green	DeletionAbsent	2
JI0651	Green	DeletionAbsent	2
JI0653	Green	DeletionAbsent	2
JI0657	Green	DeletionAbsent	1
JI0662	Green	DeletionAbsent	2
JI0665	Green	DeletionAbsent	2
JI0670	Green	DeletionAbsent	2
JI0681	Green	DeletionAbsent	2
JI0692	Green	DeletionAbsent	1
JI0693	Green	DeletionAbsent	1
JI0695	Green	DeletionAbsent	2
JI0699	Green	DeletionAbsent	1
JI0701	Green	DeletionAbsent	2
JI0703	Green	DeletionAbsent	1
JI0705	Green	DeletionAbsent	2
JI0711	Green	DeletionAbsent	1
JI0712	Green	DeletionAbsent	1
JI0716	Green	DeletionAbsent	1
JI0717	Green	DeletionAbsent	1
JI0718	Green	DeletionAbsent	1
JI0720	Green	DeletionAbsent	2
JI0721	Green	DeletionAbsent	2
JI0727	Green	DeletionAbsent	1
JI0734	Green	DeletionAbsent	2
JI0735	Green	DeletionAbsent	2
JI0737	Green	DeletionAbsent	2
JI0738	Green	DeletionAbsent	2
JI0745	Green	DeletionAbsent	2
JI0746	Green	DeletionAbsent	2
JI0752	Green	DeletionAbsent	1
JI0754	Green	DeletionAbsent	1
JI0757	Green	DeletionAbsent	1
JI0774	Green	DeletionAbsent	2
JI0780	Green	DeletionAbsent	2
JI0781	Green	DeletionAbsent	2
JI0782	Green	DeletionAbsent	2
JI0787	Green	DeletionAbsent	1
JI0790	Green	DeletionAbsent	2
JI0794	Green	DeletionAbsent	1
JI0795	Green	DeletionAbsent	2
JI0799	Green	DeletionAbsent	2
JI0804	Green	DeletionAbsent	2
JI0806	Green	DeletionAbsent	1
JI0807	Green	DeletionAbsent	1
JI0808	Green	DeletionAbsent	1
JI0813	Green	DeletionAbsent	2
JI0814	Green	DeletionAbsent	2
JI0815	Green	DeletionAbsent	1
JI0817	Green	DeletionAbsent	2
JI0819	Green	DeletionAbsent	2
JI0820	Green	DeletionAbsent	2
JI0825	Green	DeletionAbsent	2
JI0829	Green	DeletionAbsent	2
JI0832	Green	DeletionAbsent	2
JI0837	Green	DeletionAbsent	2
JI0841	Green	DeletionAbsent	2
JI0844	Green	DeletionAbsent	2
JI0846	Green	DeletionAbsent	1
JI0853	Green	DeletionAbsent	2
JI0854	Green	DeletionAbsent	2
JI0859	Green	DeletionAbsent	2
JI0863	Green	DeletionAbsent	1
JI0907	Green	DeletionAbsent	2
JI0909	Green	DeletionAbsent	2
JI0930	Green	DeletionAbsent	1
JI0932	Green	DeletionAbsent	2
JI0935	Green	DeletionAbsent	2
JI0949	Green	DeletionAbsent	1
JI0952	Green	DeletionAbsent	2
JI0955	Green	DeletionAbsent	2
JI0957	Green	DeletionAbsent	2
JI0958	Green	DeletionAbsent	2
JI0965	Green	DeletionAbsent	1
JI0968	Green	DeletionAbsent	2
JI0971	Green	DeletionAbsent	2
JI0974	Green	DeletionAbsent	2
JI0991	Green	DeletionAbsent	1
JI1002	Green	DeletionAbsent	2
JI1017	Green	DeletionAbsent	2
JI1018	Green	DeletionAbsent	2
JI1035	Green	DeletionAbsent	1
JI1041	Green	DeletionAbsent	1
JI1043	Green	DeletionAbsent	2
JI1055	Green	DeletionAbsent	2
JI1058	Green	DeletionAbsent	2
JI1071	Green	DeletionAbsent	1
JI1078	Green	DeletionAbsent	1
JI1082	Green	DeletionAbsent	2
JI1084	Green	DeletionAbsent	1
JI1085	Green	DeletionAbsent	1
JI1086	Green	DeletionAbsent	1
JI1109	Green	DeletionAbsent	1
JI1117	Green	DeletionAbsent	1
JI1121	Green	DeletionAbsent	1
JI1125	Green	DeletionAbsent	1
JI1128	Green	DeletionAbsent	1
JI1129	Green	DeletionAbsent	1
JI1132	Green	DeletionAbsent	1
JI1147	Green	DeletionAbsent	2
JI1165	Green	DeletionAbsent	2
JI1173	Green	DeletionAbsent	2
JI1179	Green	DeletionAbsent	2
JI1187	Green	DeletionAbsent	2
JI1194	Green	DeletionAbsent	1
JI1200	Green	DeletionAbsent	1
JI1201	Green	DeletionAbsent	1
JI1205	Green	DeletionAbsent	2
JI1210	Green	DeletionAbsent	2
JI1212	Green	DeletionAbsent	1
JI1214	Green	DeletionAbsent	2
JI1217	Green	DeletionAbsent	2
JI1219	Green	DeletionAbsent	2
JI1222	Green	DeletionAbsent	2
JI1224	Green	DeletionAbsent	1
JI1227	Green	DeletionAbsent	2
JI1228	Green	DeletionAbsent	2
JI1229	Green	DeletionAbsent	2
JI1231	Green	DeletionAbsent	2
JI1237	Green	DeletionAbsent	1
JI1245	Green	DeletionAbsent	2
JI1246	Green	DeletionAbsent	1
JI1260	Green	DeletionAbsent	1
JI1261	Green	DeletionAbsent	1
JI1263	Green	DeletionAbsent	2
JI1265	Green	DeletionAbsent	1
JI1266	Green	DeletionAbsent	1
JI1268	Green	DeletionAbsent	1
JI1269	Green	DeletionAbsent	1
JI1270	Green	DeletionAbsent	1
JI1272	Green	DeletionAbsent	2
JI1277	Green	DeletionAbsent	2
JI1280	Green	DeletionAbsent	2
JI1282	Green	DeletionAbsent	2
JI1294	Green	DeletionAbsent	2
JI1303	Green	DeletionAbsent	2
JI1307	Green	DeletionAbsent	1
JI1313	Green	DeletionAbsent	2
JI1344	Green	DeletionAbsent	2
JI1345	Green	DeletionAbsent	1
JI1366	Green	DeletionAbsent	2
JI1395	Green	DeletionAbsent	1
JI1398	Green	DeletionAbsent	2
JI1407	Green	DeletionAbsent	2
JI1423	Green	DeletionAbsent	2
JI1434	Green	DeletionAbsent	1
JI1444	Green	DeletionAbsent	1
JI1453	Green	DeletionAbsent	2
JI1462	Green	DeletionAbsent	2
JI1464	Green	DeletionAbsent	2
JI1469	Green	DeletionAbsent	2
JI1477	Green	DeletionAbsent	1
JI1482	Green	DeletionAbsent	1
JI1486	Green	DeletionAbsent	1
JI1491	Green	DeletionAbsent	1
JI1492	Green	DeletionAbsent	1
JI1503	Green	DeletionAbsent	2
JI1519	Green	DeletionAbsent	1
JI1523	Green	DeletionAbsent	2
JI1524	Green	DeletionAbsent	1
JI1528	Green	DeletionAbsent	2
JI1529	Green	DeletionAbsent	2
JI1535	Green	DeletionAbsent	2
JI1538	Green	DeletionAbsent	1
JI1539	Green	DeletionAbsent	2
JI1542	Green	DeletionAbsent	1
JI1543	Green	DeletionAbsent	1
JI1547	Green	DeletionAbsent	1
JI1548	Green	DeletionAbsent	1
JI1555	Green	DeletionAbsent	2
JI1562	Green	DeletionAbsent	2
JI1569	Green	DeletionAbsent	2
JI1573	Green	DeletionAbsent	2
JI1575	Green	DeletionAbsent	1
JI1577	Green	DeletionAbsent	2
JI1578	Green	DeletionAbsent	1
JI1581	Green	DeletionAbsent	2
JI1585	Green	DeletionAbsent	2
JI1587	Green	DeletionAbsent	2
JI1588	Green	DeletionAbsent	2
JI1590	Green	DeletionAbsent	2
JI1592	Green	DeletionAbsent	2
JI1607	Green	DeletionAbsent	2
JI1625	Green	DeletionAbsent	2
JI1626	Green	DeletionAbsent	2
JI1636	Green	DeletionAbsent	2
JI1639	Green	DeletionAbsent	2
JI1652	Green	DeletionAbsent	1
JI1663	Green	DeletionAbsent	2
JI1669	Green	DeletionAbsent	1
JI1679	Green	DeletionAbsent	2
JI1698	Green	DeletionAbsent	1
JI1699	Green	DeletionAbsent	2
JI1702	Green	DeletionAbsent	1
JI1706	Green	DeletionAbsent	1
JI1707	Green	DeletionAbsent	1
JI1713	Green	DeletionAbsent	1
JI1714	Green	DeletionAbsent	2
JI1718	Green	DeletionAbsent	2
JI1720	Green	DeletionAbsent	2
JI1721	Green	DeletionAbsent	2
JI1722	Green	DeletionAbsent	2
JI1724	Green	DeletionAbsent	2
JI1732	Green	DeletionAbsent	1
JI1733	Green	DeletionAbsent	1
JI1735	Green	DeletionAbsent	2
JI1737	Green	DeletionAbsent	1
JI1747	Green	DeletionAbsent	1
JI1748	Green	DeletionAbsent	2
JI1762	Green	DeletionAbsent	2
JI1768	Green	DeletionAbsent	2
JI1772	Green	DeletionAbsent	2
JI1774	Green	DeletionAbsent	2
JI1775	Green	DeletionAbsent	2
JI1791	Green	DeletionAbsent	2
JI1792	Green	DeletionAbsent	1
JI1793	Green	DeletionAbsent	1
JI1800	Green	DeletionAbsent	2
JI1804	Green	DeletionAbsent	2
JI1816	Green	DeletionAbsent	2
JI1817	Green	DeletionAbsent	2
JI1822	Green	DeletionAbsent	2
JI1825	Green	DeletionAbsent	2
JI1829	Green	DeletionAbsent	2
JI1834	Green	DeletionAbsent	1
JI1835	Green	DeletionAbsent	2
JI1837	Green	DeletionAbsent	1
JI1846	Green	DeletionAbsent	1
JI1848	Green	DeletionAbsent	2
JI1850	Green	DeletionAbsent	2
JI1851	Green	DeletionAbsent	1
JI1863	Green	DeletionAbsent	1
JI1865	Green	DeletionAbsent	2
JI1870	Green	DeletionAbsent	1
JI1882	Green	DeletionAbsent	2
JI1885	Green	DeletionAbsent	2
JI1891	Green	DeletionAbsent	1
JI1894	Green	DeletionAbsent	2
JI1900	Green	DeletionAbsent	1
JI1910	Green	DeletionAbsent	1
JI1911	Green	DeletionAbsent	2
JI1915	Green	DeletionAbsent	2
JI1919	Green	DeletionAbsent	1
JI1920	Green	DeletionAbsent	1
JI1921	Green	DeletionAbsent	1
JI1922	Green	DeletionAbsent	2
JI1933	Green	DeletionAbsent	1
JI1946	Green	DeletionAbsent	2
JI1947	Green	DeletionAbsent	2
JI1948	Green	DeletionAbsent	2
JI1956	Green	DeletionAbsent	1
JI1962	Green	DeletionAbsent	1
JI1967	Green	DeletionAbsent	2
JI1968	Green	DeletionAbsent	2
JI1971	Green	DeletionAbsent	1
JI1980	Green	DeletionAbsent	2
JI1981	Green	DeletionAbsent	1
JI1985	Green	DeletionAbsent	2
JI1989	Green	DeletionAbsent	2
JI1991	Green	DeletionAbsent	2
JI1995	Green	DeletionAbsent	1
JI1996	Green	DeletionAbsent	2
JI2001	Green	DeletionAbsent	2
JI2007	Green	DeletionAbsent	1
JI2016	Green	DeletionAbsent	2
JI2017	Green	DeletionAbsent	2
JI2018	Green	DeletionAbsent	1
JI2036	Green	DeletionAbsent	2
JI2048	Green	DeletionAbsent	1
JI2058	Green	DeletionAbsent	1
JI2061	Green	DeletionAbsent	1
JI2081	Green	DeletionAbsent	1
JI2083	Green	DeletionAbsent	2
JI2084	Green	DeletionAbsent	2
JI2089	Green	DeletionAbsent	2
JI2100	Green	DeletionAbsent	2
JI2104	Green	DeletionAbsent	1
JI2105	Green	DeletionAbsent	1
JI2106	Green	DeletionAbsent	1
JI2108	Green	DeletionAbsent	2
JI2110	Green	DeletionAbsent	2
JI2114	Green	DeletionAbsent	2
JI2116	Green	DeletionAbsent	2
JI2126	Green	DeletionAbsent	1
JI2129	Green	DeletionAbsent	1
JI2134	Green	DeletionAbsent	2
JI2149	Green	DeletionAbsent	2
JI2150	Green	DeletionAbsent	1
JI2152	Green	DeletionAbsent	2
JI2153	Green	DeletionAbsent	2
JI2154	Green	DeletionAbsent	2
JI2156	Green	DeletionAbsent	2
JI2157	Green	DeletionAbsent	2
JI2160	Green	DeletionAbsent	2
JI2174	Green	DeletionAbsent	2
JI2177	Green	DeletionAbsent	1
JI2182	Green	DeletionAbsent	2
JI2193	Green	DeletionAbsent	2
JI2202	Green	DeletionAbsent	1
JI2217	Green	DeletionAbsent	2
JI2219	Green	DeletionAbsent	2
JI2221	Green	DeletionAbsent	1
JI2223	Green	DeletionAbsent	1
JI2228	Green	DeletionAbsent	2
JI2233	Green	DeletionAbsent	2
JI2236	Green	DeletionAbsent	2
JI2240	Green	DeletionAbsent	2
JI2243	Green	DeletionAbsent	1
JI2257	Green	DeletionAbsent	2
JI2262	Green	DeletionAbsent	1
JI2273	Yellow	DeletionPresent	3
JI2274	Green	DeletionAbsent	2
JI2277	Green	DeletionAbsent	2
JI2279	Green	DeletionAbsent	1
JI2294	Green	DeletionAbsent	2
JI2296	Green	DeletionAbsent	2
JI2300	Green	DeletionAbsent	2
JI2301	Green	DeletionAbsent	1
JI2311	Green	DeletionAbsent	1
JI2312	Green	DeletionAbsent	1
JI2314	Green	DeletionAbsent	2
JI2317	Green	DeletionAbsent	2
JI2321	Green	DeletionAbsent	2
JI2324	Green	DeletionAbsent	2
JI2331	Green	DeletionAbsent	2
JI2332	Green	DeletionAbsent	1
JI2344	Green	DeletionAbsent	2
JI2345	Green	DeletionAbsent	1
JI2348	Green	DeletionAbsent	1
JI2349	Green	DeletionAbsent	2
JI2350	Green	DeletionAbsent	2
JI2353	Green	DeletionAbsent	1
JI2355	Green	DeletionAbsent	2
JI2366	Yellow	DeletionPresent	3
JI2374	Green	DeletionAbsent	2
JI2385	Green	DeletionAbsent	1
JI2389	Green	DeletionAbsent	2
JI2393	Green	DeletionAbsent	2
JI2394	Green	DeletionAbsent	2
JI2401	Green	DeletionAbsent	2
JI2402	Green	DeletionAbsent	1
JI2403	Green	DeletionAbsent	2
JI2410	Green	DeletionAbsent	1
JI2423	Green	DeletionAbsent	1
JI2429	Green	DeletionAbsent	1
JI2434	Green	DeletionAbsent	2
JI2436	Green	DeletionAbsent	2
JI2464	Green	DeletionAbsent	2
JI2500	Green	DeletionAbsent	1
JI2501	Green	DeletionAbsent	2
JI2548	Green	DeletionAbsent	1
JI2559	Green	DeletionAbsent	1
JI2561	Green	DeletionAbsent	1
JI2583	Green	DeletionAbsent	1
JI2595	Green	DeletionAbsent	2
JI2603	Green	DeletionAbsent	1
JI2611	Green	DeletionAbsent	1
JI2623	Green	DeletionAbsent	2
JI2644	Green	DeletionAbsent	2
JI2647	Green	DeletionAbsent	1
JI2648	Green	DeletionAbsent	2
JI2649	Green	DeletionAbsent	1
JI2659	Green	DeletionAbsent	1
JI2671	Green	DeletionAbsent	2
JI2683	Green	DeletionAbsent	1
JI2693	Green	DeletionAbsent	1
JI2699	Green	DeletionAbsent	1
JI2707	Green	DeletionAbsent	2
JI2711	Green	DeletionAbsent	2
JI2716	Yellow	DeletionPresent	3
JI2742	Green	DeletionAbsent	2
JI2743	Green	DeletionAbsent	1
JI2753	Green	DeletionAbsent	2
JI2757	Green	DeletionAbsent	2
JI2761	Green	DeletionAbsent	2
JI2764	Green	DeletionAbsent	2
JI2776	Yellow	DeletionPresent	3
JI2782	Green	DeletionAbsent	2
JI2787	Green	DeletionAbsent	2
JI2822	Green	DeletionAbsent	2
JI3006	Green	DeletionAbsent	1
JI3022	Green	DeletionAbsent	2
JI3027	Green	DeletionAbsent	1
JI3029	Green	DeletionAbsent	1
JI3030	Green	DeletionAbsent	2
JI3049	Green	DeletionAbsent	1
JI3053	Green	DeletionAbsent	1
JI3080	Green	DeletionAbsent	2
JI3086	Green	DeletionAbsent	1
JI3096	Green	DeletionAbsent	1
JI3098	Green	DeletionAbsent	2
JI3119	Green	DeletionAbsent	2
JI3120	Green	DeletionAbsent	1
JI3134	Green	DeletionAbsent	1
JI3167	Green	DeletionAbsent	2
JI3178	Green	DeletionAbsent	1
JI3179	Green	DeletionAbsent	1
JI3186	Green	DeletionAbsent	2
JI3604	Green	DeletionAbsent	2
JI3605	Green	DeletionAbsent	2
JI3609	Green	DeletionAbsent	2
JI3610	Green	DeletionAbsent	2
JI3611	Green	DeletionAbsent	2
JI3614	Green	DeletionAbsent	2
JI0249	Green	DeletionAbsent	1
JI3025	Green	DeletionAbsent	1
Baryton/JI3638	Green	DeletionAbsent	2
FN1453/JI3635	Green	DeletionAbsent	2
FN2026_7/JI3636	Green	DeletionAbsent	2
FN2076_5/JI3637	Green	DeletionAbsent	2
Samson/JI3639	Green	DeletionAbsent	2
JI0330	Green	DeletionAbsent	2
JI0335	Green	DeletionAbsent	2
JI0870	Green	DeletionAbsent	2
JI0874	Green	DeletionAbsent	2
JI0877	Green	DeletionAbsent	2
JI0884	Green	DeletionAbsent	2
JI0887	Green	DeletionAbsent	2
JI0892	Green	DeletionAbsent	1
JI0893	Green	DeletionAbsent	1
JI1014	Green	DeletionAbsent	2
JI1386	Green	DeletionAbsent	1
JI2329	Green	DeletionAbsent	2
JI2371	Green	DeletionAbsent	2
JI1059	NA	DeletionAbsent	2
JI2538	NA	DeletionAbsent	1
JI3147	NA	DeletionAbsent	1

## Sheet: Table S17-JI0816xJI2822
Supplementary Table 17. Genotype data from JI0816xJI2822 F2 mapping population. Marker genotyping data for 405 F2 progeny from the cross of JI0816 x JI2822. This table presents the genotyping results for 405 F2 progeny derived from the cross between pea lines JI0816 and JI2822. It includes the marker identifier, linkage group, centimorgan position (cM), chromosome and position on both the ZW6 and…
Marker	Lg	cM	Chromosome (ZW6)	Position (ZW6)	e-value	Chromosome (Cameor)	Position (Cameor)	comment		F1-10 A1	F1-10 A10	F1-10 A3	F1-10 A9	F1-10 B1	F1-10 B2	F1-10 B3	F1-10 B4	F1-10 B9	F1-10 C1	F1-10 C2	F1-10 C3	F1-10 C4	F1-10 C9	F1-10 D1	F1-10 D2	F1-10 D3	F1-10 D4	F1-10 D9	F1-10 E1	F1-10 E12	F1-10 E2	F1-10 E3	F1-10 E4	F1-10 E9	F1-10 F1	F1-10 F12	F1-10 F2	F1-10 F3	F1-10 F4	F1-10 F9	F1-10 G1	F1-10 G12	F1-10 G2	F1-10 G3	F1-10 G4	F1-10 G5	F1-10 H1	F1-10 H12	F1-10 H2
AX-183861334	I	0	Chr2	504217	1.22e-27	chr2LG1	310851			H	H	H	G	G	H	G	Y	G	H	H	H	H	G	H	Y	G	-	H	G	H	G	G	H	G	H	H	H	G	Y	H	H	H	H	H	H	G	H	G	H
AX-183575854	I	0	Chr2	504693	1.22e-27	chr2LG1	311327			H	H	H	G	G	H	G	Y	G	H	H	H	H	G	H	Y	G	G	H	G	H	G	G	H	G	H	H	H	G	Y	H	H	H	H	H	H	G	H	G	H
AX-183575855	I	0.25	Chr2	550015	2.61e-29	chr2LG1	357076			H	H	H	G	G	H	G	Y	G	H	H	H	H	G	H	Y	G	G	H	G	H	G	G	H	G	H	H	H	G	-	H	H	H	H	H	H	G	H	G	H
AX-183564085	I	0.25	Chr2	564445	1.22e-27	chr2LG1	371267			H	H	H	G	G	H	G	Y	G	H	H	H	H	G	H	Y	G	G	H	G	H	G	G	H	G	H	H	H	G	Y	H	H	H	H	H	H	G	H	G	H
AX-183868158	I	0.25	Chr2	565357	2.61e-29	chr2LG1	372170			H	H	H	G	G	H	G	Y	G	H	H	H	H	G	H	Y	G	G	H	G	H	G	G	H	G	H	H	H	G	Y	H	H	H	H	H	H	G	H	G	H
AX-183564086	I	0.5	Chr2	617848	2.61e-29	chr2LG1	429473			H	H	H	G	G	H	G	Y	G	H	H	H	H	G	H	Y	G	G	H	G	H	G	G	H	G	H	H	H	G	Y	H	H	H	H	H	H	G	H	G	H
AX-183865478	I	0.5	Chr2	618641	1.22e-27	chr2LG1	430263			H	H	H	G	G	H	G	-	G	H	H	H	H	G	H	Y	G	G	H	G	H	G	G	H	G	H	H	H	G	Y	H	H	H	H	H	H	G	H	G	H
AX-183564087	I	0.87	Chr2	636941	5.65e-26	chr2LG1	456660			H	H	H	G	G	H	G	Y	G	H	H	H	H	G	H	Y	G	G	H	G	H	G	G	H	G	H	H	H	G	-	H	H	H	H	H	H	G	H	G	H
AX-183589516	I	1.24	Chr2	670926	1.22e-27	chr2LG1	508159			H	H	H	G	G	H	G	Y	G	H	H	H	H	G	H	Y	G	G	H	G	H	G	G	G	G	H	H	H	G	Y	H	H	H	H	H	H	G	H	G	H
AX-183575856	I	1.24	Chr2	700593	1.22e-27	chr2LG1	549854			H	H	H	G	G	H	G	Y	G	H	H	H	H	G	H	Y	G	G	H	G	H	G	G	H	G	H	H	H	G	-	H	H	H	H	H	H	G	H	G	H
AX-183575857	I	1.24	Chr2	734910	1.22e-27	chr2LG1	611774			H	H	H	G	G	H	G	Y	G	H	H	H	H	G	H	Y	G	G	H	G	H	G	G	H	G	H	H	H	G	Y	H	H	H	H	H	H	G	H	G	H
AX-183638267	I	1.74	Chr2	1169322	1.22e-27	chr2LG1	969269			H	H	H	G	G	H	G	-	G	H	H	H	H	G	H	Y	G	G	H	G	H	G	G	H	G	H	H	H	G	Y	H	H	H	H	H	H	G	H	G	H
AX-183589523	I	1.74	Chr2	1170555	2.61e-29	chr2LG1	970502			H	H	H	G	G	H	G	-	G	H	H	H	H	G	H	Y	G	G	H	G	H	G	G	H	G	H	H	H	G	Y	H	H	H	H	H	H	G	H	G	H
AX-183865132	I	1.74	Chr2	1174908	1.22e-27	chr2LG1	974854			H	H	H	G	G	H	G	Y	G	H	H	H	G	G	H	Y	G	G	H	G	H	G	G	H	G	H	H	H	G	Y	H	H	H	H	H	H	G	H	G	H
AX-183868000	I	1.99	Chr2	1406807	1.22e-27	chr2LG1	1185952			H	H	H	G	G	H	G	Y	G	G	H	H	H	G	H	Y	G	G	H	G	H	G	G	H	G	H	H	H	G	Y	H	H	H	H	H	H	G	H	G	H
AX-183867484	I	1.99	Chr2	1406811	1.22e-27	chr2LG1	1185956			H	H	H	G	G	H	G	Y	G	G	H	H	H	G	H	Y	G	G	H	G	H	G	G	H	G	H	H	H	G	Y	H	H	H	H	H	H	G	H	G	H
AX-183880584	I	1.99	Chr2	1410981	2.61e-29	chr2LG1	1189710			H	H	H	G	G	H	G	Y	G	G	H	H	H	G	H	Y	G	G	H	G	H	G	G	H	G	H	H	H	G	Y	H	H	H	H	H	H	G	H	G	H
AX-183890801	I	1.99	Chr2	1411521	1.22e-27	chr2LG1	1190251			H	H	H	G	G	H	G	H	G	G	H	H	H	G	H	Y	G	G	H	G	H	G	G	H	G	H	H	H	G	Y	H	H	H	H	H	H	G	H	G	H
AX-183868655	I	1.99	Chr2	1554274	1.22e-27	chr2LG1	1356113			H	H	H	G	G	H	G	Y	G	G	H	H	H	G	H	Y	H	G	H	G	H	G	G	H	G	H	H	H	G	Y	H	H	H	H	H	H	G	H	G	H
AX-183589532	I	1.99	Chr2	1559223	1.22e-27	chr2LG1	1361062			H	H	H	G	G	H	G	Y	G	G	H	H	H	G	H	Y	G	G	H	G	H	G	G	H	G	H	H	H	G	Y	H	H	H	H	H	H	G	H	G	H
AX-183875573	I	1.99	Chr2	1562143	2.61e-29	chr2LG1	1363982			H	H	-	G	G	H	G	-	G	G	H	H	H	G	H	Y	G	G	H	G	H	G	G	H	G	H	H	H	G	Y	H	H	H	H	H	H	G	H	G	H
AX-183564093	I	1.99	Chr2	1571039	2.61e-29	chr2LG1	1373073			H	H	H	G	G	H	G	Y	G	G	H	H	H	G	H	Y	G	G	H	G	H	G	G	H	G	H	H	H	G	Y	H	H	H	H	H	H	G	H	G	H
AX-183564094	I	1.99	Chr2	1587039	2.61e-29	chr2LG1	1389667			H	H	H	G	G	H	G	Y	G	G	H	H	H	G	H	Y	G	G	H	G	H	G	G	H	G	H	H	H	G	Y	H	H	H	H	H	H	G	H	G	H
AX-183638270	I	1.99	Chr2	1593089	1.22e-27	chr2LG1	1395717			H	H	H	G	G	H	G	Y	G	G	H	H	H	G	H	Y	G	G	H	G	H	G	G	H	G	H	H	H	G	Y	H	H	H	H	H	H	G	H	G	H
AX-183589535	I	1.99	Chr2	1602721	2.61e-29	chr2LG1	1405349			H	H	H	G	G	H	G	Y	G	G	H	H	H	G	H	Y	G	G	H	G	H	G	G	H	G	H	H	H	G	Y	H	H	H	H	H	H	G	H	G	H
AX-183638271	I	1.99	Chr2	1604306	2.61e-29	chr2LG1	1406934			H	H	H	G	G	H	G	Y	G	G	H	H	-	G	H	Y	G	G	H	G	H	G	G	H	G	H	H	H	G	-	H	H	H	H	H	H	G	H	G	H
AX-183573129	I	1.99	Chr2	1619425	1.22e-27	chr2LG1	1421538			H	H	H	G	G	H	G	Y	G	G	H	H	H	G	H	Y	G	G	H	G	H	G	G	H	G	H	H	H	G	Y	H	H	H	H	H	H	G	H	G	H
AX-183589538	I	1.99	Chr2	1656088	1.22e-27	chr2LG1	1440691			-	H	H	G	G	H	G	Y	G	G	H	H	H	G	H	Y	G	-	H	G	H	G	G	H	G	H	H	H	G	Y	H	H	H	H	H	H	G	H	G	H
AX-183589539	I	1.99	Chr2	1658188	1.22e-27	chr2LG1	1442237			H	H	H	G	G	H	G	Y	G	G	H	H	H	G	H	Y	G	-	H	G	H	G	G	H	G	H	H	H	G	Y	H	H	H	H	H	H	G	H	G	H
AX-183574817	I	1.99	Chr2	1658879	2.61e-29	chr2LG1	1442928			H	H	H	G	G	H	G	Y	G	G	H	H	H	G	H	Y	G	G	H	G	H	G	G	H	G	H	H	H	G	Y	H	H	H	H	H	H	G	H	G	H
AX-183884964	I	1.99	Chr2	1691929	1.22e-27	chr2LG1	1475951			H	H	H	G	G	H	G	Y	G	G	H	H	H	G	H	Y	G	G	H	G	H	G	G	H	G	H	H	H	G	Y	H	H	H	H	H	H	G	H	G	H
AX-183575861	I	1.99	Chr2	1693818	2.61e-29	chr2LG1	1477840			H	H	H	G	G	H	G	Y	G	G	H	H	H	G	H	Y	G	G	H	G	H	G	G	H	G	H	H	H	G	Y	H	H	H	H	H	H	G	H	G	H
AX-183881114	I	2.11	Chr2	1695977	1.22e-27	chr2LG1	1479999			H	H	H	G	G	H	G	Y	G	G	H	H	H	G	H	Y	G	G	-	G	H	G	G	H	G	H	H	H	G	Y	H	H	H	H	H	H	G	H	G	H
AX-183563110	I	2.36	Chr2	1869731	1.22e-27	chr2LG1	1609313			H	Y	H	G	G	H	G	H	G	G	H	H	H	G	H	Y	G	G	Y	G	H	G	G	H	G	H	H	H	-	Y	H	H	G	H	H	H	G	H	G	H
AX-183575862	I	2.36	Chr2	1870298	1.22e-27	chr2LG1	1609880			H	Y	H	G	G	H	G	H	G	G	H	H	H	G	H	Y	G	G	H	G	H	G	G	H	G	H	H	H	G	Y	H	H	H	H	H	H	G	H	G	H
AX-183589547	I	2.61	Chr2	2030720	2.61e-29	chr2LG1	1768345			H	Y	H	G	G	H	G	Y	G	G	H	H	H	G	H	Y	G	G	H	G	H	G	G	H	G	H	H	H	G	Y	H	H	H	H	H	H	G	H	G	H
AX-183575866	I	2.61	Chr2	2153741	1.22e-27	chr2LG1	2062472			H	Y	H	G	G	H	G	Y	G	G	H	H	H	G	H	Y	G	G	H	G	H	G	G	H	G	H	H	H	G	Y	H	H	H	H	H	H	G	H	G	H
AX-183873203	I	2.61	Chr2	2155233	1.22e-27	chr2LG1	2063964			H	-	H	G	G	H	G	H	G	G	H	H	H	G	H	Y	G	G	H	G	H	G	G	H	G	H	H	H	G	Y	H	H	H	H	H	H	G	H	G	H
AX-183870139	I	2.61	Chr2	2190635	1.22e-27	chr2LG1	2099281			H	Y	H	G	G	H	G	Y	G	G	H	H	-	G	H	Y	G	G	H	G	-	G	G	H	G	H	H	H	G	Y	-	H	-	H	H	H	G	H	G	H
AX-183575867	I	2.73	Chr2	2423466	1.22e-27	chr2LG1	2185240			H	Y	H	G	G	H	G	Y	G	G	H	H	H	G	H	Y	G	G	H	G	H	G	G	H	G	H	H	H	G	Y	H	H	H	H	H	H	G	H	G	H
AX-183564102	I	2.73	Chr2	2432712	2.61e-29	chr2LG1	2195249			H	Y	H	G	G	H	G	Y	G	G	H	H	H	G	H	Y	G	G	H	G	H	G	G	H	G	H	H	H	G	Y	H	H	H	H	H	H	G	H	G	H
AX-183575868	I	2.73	Chr2	2461088	2.61e-29	chr2LG1	2206899			H	Y	H	G	G	H	G	Y	G	G	H	H	H	G	H	Y	G	G	H	G	H	G	G	H	G	H	H	H	G	-	H	H	H	H	H	H	G	H	G	H
AX-183564103	I	2.73	Chr2	2462735	5.65e-26	chr2LG1	2208572			H	Y	H	G	G	H	G	Y	G	G	H	H	H	G	H	Y	G	G	H	G	H	G	G	H	G	H	H	H	G	Y	H	H	H	H	H	H	G	H	G	H
AX-183589570	I	2.86	Chr2	2767535	2.61e-29	chr2LG1	2506355			H	Y	H	G	G	H	G	Y	G	G	H	H	H	G	H	Y	G	-	H	G	H	G	G	H	G	H	-	H	G	Y	H	H	H	H	H	H	G	H	G	H
AX-183589571	I	2.86	Chr2	2818496	1.22e-27	chr2LG1	2538465			H	-	H	G	G	H	G	Y	G	G	H	H	H	G	H	-	G	G	H	G	-	G	G	H	G	H	-	H	G	-	H	H	H	H	H	H	G	H	G	H
AX-183589579	I	2.98	Chr2	3068351	1.22e-27	chr2LG1	2768129			H	H	H	G	G	H	G	-	G	G	H	H	H	G	H	Y	G	G	H	G	H	G	G	H	G	H	H	H	G	-	H	H	H	H	H	H	G	H	G	H
AX-183893539	I	2.98	Chr2	3068468	7.31e-25	chr2LG1	2768245			H	Y	H	G	G	H	G	Y	G	G	H	H	H	G	H	Y	G	G	H	G	H	G	G	H	G	H	H	H	G	Y	H	H	H	H	H	H	G	H	G	H
AX-183868940	I	2.98	Chr2	3118374	1.57e-26	chr2LG1	2770984			H	Y	H	G	G	H	G	Y	G	G	H	H	H	G	H	Y	G	G	H	G	H	G	G	H	G	H	H	H	G	Y	H	H	-	H	H	H	G	H	G	H
AX-183862303	I	2.98	Chr2	3127064	5.65e-26	chr2LG1	2778964			H	Y	H	G	G	H	G	Y	G	G	H	H	H	G	H	Y	G	G	H	G	H	G	G	H	G	H	H	H	G	Y	H	H	H	H	H	H	G	H	G	H
AX-183564104	I	2.98	Chr2	3127384	2.61e-29	chr2LG1	2779287			H	Y	H	G	G	H	G	Y	G	G	H	H	H	G	H	Y	G	G	H	G	H	G	G	H	G	H	H	H	G	Y	H	H	H	H	H	H	G	H	G	H
AX-183880586	I	2.98	Chr2	3166362	5.65e-26	chr2LG1	2835218			H	Y	H	G	G	H	G	Y	G	G	H	H	H	G	H	Y	G	G	H	G	H	G	G	H	G	H	H	H	G	Y	H	H	H	H	H	H	G	H	G	H
AX-183564106	I	2.98	Chr2	3202035	2.61e-29	chr2LG1	2849982			H	Y	H	G	G	H	G	Y	G	G	H	H	H	G	H	Y	G	G	H	G	H	G	G	H	G	H	H	H	G	Y	G	H	H	H	H	H	G	H	G	H
AX-183564097	I	2.98	Chr2	3241080	1.22e-27	chr2LG1	2896805			H	Y	H	G	G	H	G	Y	G	G	H	H	H	G	H	Y	G	G	H	G	H	G	G	H	G	H	H	H	G	Y	H	H	H	H	H	H	G	H	G	H
AX-183575871	I	2.98	Chr2	3312413	1.22e-27	chr2LG1	2983508			H	Y	H	G	G	H	G	Y	G	G	H	H	H	G	H	Y	G	G	H	G	H	G	G	H	G	H	H	H	G	Y	H	H	H	H	H	H	G	H	G	H
AX-183564108	I	3.48	Chr2	3803790	1.22e-27	chr2LG1	3521672			H	Y	H	G	G	H	G	Y	G	G	H	H	H	G	H	Y	G	G	H	G	H	G	G	H	G	H	H	H	G	Y	H	H	H	H	H	H	G	H	G	H
AX-183563112	I	3.48	Chr2	3803945	1.22e-27	chr2LG1	3521827			H	Y	H	G	G	H	G	Y	G	G	H	H	H	G	H	Y	G	G	H	G	H	G	G	H	G	H	H	H	G	Y	H	H	H	H	H	H	G	H	G	H
AX-183862017	I	3.48	Chr2	3805254	2.61e-29	chr2LG1	3523136			H	Y	H	G	G	H	G	Y	G	G	H	H	H	G	H	Y	G	G	H	G	H	G	G	H	G	H	H	H	G	Y	H	H	H	H	H	H	G	H	G	H
AX-183563113	I	3.48	Chr2	3805959	1.22e-27	chr2LG1	3523841			H	H	H	G	G	H	G	H	G	G	H	H	H	G	H	Y	G	G	H	G	H	G	G	H	G	H	H	H	G	H	-	H	H	H	H	H	G	H	G	H
AX-183564111	I	3.48	Chr2	488937453	9.53e-19	chr2LG1	3589974			H	Y	H	G	G	H	G	Y	G	G	H	H	H	G	H	Y	G	G	H	G	H	G	G	H	G	H	H	H	G	Y	H	H	H	H	H	H	G	H	G	H
AX-183564112	I	3.48	Chr2	3924326	2.61e-29	chr2LG1	3633465			H	Y	H	G	G	H	G	Y	G	G	H	H	H	G	H	Y	G	G	H	G	H	G	-	H	G	H	H	H	G	Y	H	H	H	H	H	H	G	H	G	H
AX-183589590	I	3.48	Chr2	3926520	1.22e-27	chr2LG1	3635659			H	Y	H	G	G	H	G	Y	G	G	-	H	H	G	H	-	G	G	H	G	-	G	G	H	G	H	G	-	G	Y	H	H	-	H	H	H	G	H	G	H
AX-183865337	I	3.97	Chr2	4159380	2.61e-29	chr2LG1	4018580			H	-	H	G	G	H	G	Y	G	G	H	H	H	G	H	Y	G	G	H	G	H	G	G	H	G	H	H	H	G	Y	H	H	H	H	H	H	G	H	G	H
AX-183589552	I	3.97	Chr2	4163299	1.22e-27	chr2LG1	4022512			H	Y	H	G	G	H	G	Y	G	G	H	H	Y	G	H	Y	G	G	H	G	H	G	G	H	G	H	H	H	G	Y	H	H	H	H	H	H	G	H	G	H
AX-183589556	I	4.22	Chr2	4254424	5.65e-26	chr2LG1	4139008			H	Y	H	G	G	H	G	Y	G	G	H	H	H	G	H	Y	G	G	H	G	H	G	G	H	G	H	H	H	G	Y	H	H	H	H	H	H	G	H	G	H
AX-183635817	I	4.35	Chr2	4646085	1.22e-27	scaffold03178	121233			H	Y	H	G	G	H	G	Y	G	G	H	H	H	G	H	Y	G	G	H	G	H	G	G	H	G	H	H	H	G	Y	H	H	H	H	H	H	G	H	G	H
AX-183871387	I	4.72	Chr2	5002097	1.22e-27	chr2LG1	4642395			H	Y	H	G	G	H	G	Y	G	G	H	H	H	G	H	Y	G	G	H	G	H	G	G	H	G	H	H	H	G	Y	H	H	G	H	H	H	G	H	G	H
AX-183575872	I	4.72	Chr2	5002260	1.22e-27	chr2LG1	4642558			H	Y	H	G	G	H	G	Y	G	G	H	H	H	G	H	Y	G	G	H	G	H	G	G	H	G	H	H	H	G	Y	H	H	H	H	H	H	G	H	G	H
AX-183881695	I	4.72	Chr2	5032475	1.22e-27	chr2LG1	4647027			H	Y	H	G	G	H	G	-	G	G	H	H	-	G	H	Y	G	G	H	G	H	G	G	H	G	H	H	H	H	Y	H	H	H	H	H	H	-	-	-	H
AX-183563114	I	4.72	Chr2	5064220	1.22e-27	chr2LG1	4653030			H	Y	H	G	G	H	G	Y	G	G	H	H	H	G	H	Y	G	-	H	G	H	G	G	H	G	H	H	H	G	Y	H	H	H	H	H	H	G	H	G	H
AX-183589592	I	4.72	JAMSHJ010000452.1	6601	2.61e-29	chr2LG1	4685800			H	Y	H	G	G	H	G	Y	G	G	H	H	H	G	H	Y	G	G	H	G	H	G	G	H	G	H	H	H	G	Y	H	H	H	H	H	H	G	H	G	H
AX-183589593	I	4.72	JAMSHJ010000452.1	970	2.61e-29	chr2LG1	4691383			H	Y	H	G	G	H	G	Y	G	G	H	H	H	G	H	Y	G	G	H	G	H	G	G	H	G	H	H	H	G	-	H	H	H	H	H	H	G	H	G	H
AX-183564114	I	4.72	Chr2	5107871	1.22e-27	chr2LG1	4706516			H	Y	H	G	G	H	G	Y	G	G	H	H	H	G	H	Y	G	H	H	G	H	G	G	H	G	H	H	H	G	Y	H	H	H	H	H	H	G	H	G	H
AX-183564115	I	4.72	Chr2	5157323	1.22e-27	chr2LG1	4764074			H	-	H	G	G	H	G	Y	G	G	H	H	H	G	-	Y	G	G	H	G	H	G	G	H	G	H	H	H	G	Y	H	H	H	H	H	H	G	-	G	H
AX-183882284	I	4.72	Chr2	5157405	2.61e-29	chr2LG1	4764156			H	Y	H	G	G	H	G	Y	G	G	H	H	H	G	H	Y	G	G	H	G	H	G	G	H	G	H	H	H	G	Y	H	H	H	H	H	H	G	H	G	H
AX-183563116	I	4.72	Chr2	5157554	2.61e-29	chr2LG1	4764305			H	Y	H	G	G	H	G	Y	G	G	H	H	H	G	H	Y	G	G	H	G	H	G	G	H	G	H	H	H	G	Y	H	H	H	H	H	H	G	H	G	H
AX-183861203	I	4.72	Chr2	5157944	1.22e-27	chr2LG1	4764695			H	Y	H	G	G	H	G	Y	G	G	H	H	H	G	H	Y	G	G	H	G	H	G	G	H	G	H	H	H	G	Y	H	H	H	H	H	H	G	H	G	H
AX-183589599	I	4.72	Chr2	5263601	2.61e-29	chr2LG1	4841646			H	Y	H	G	G	H	G	Y	G	G	H	H	H	G	H	Y	G	G	H	G	H	G	G	H	G	H	H	H	G	Y	H	H	H	H	H	H	G	H	G	H
AX-183564116	I	4.72	Chr2	5283608	2.61e-29	chr2LG1	4861143			H	Y	H	G	G	H	G	Y	G	G	H	H	H	G	H	Y	G	G	H	G	H	G	G	H	G	H	H	H	G	Y	H	H	H	H	H	H	G	H	G	H
AX-183575876	I	4.72	Chr2	5302912	1.22e-27	chr2LG1	4890203			H	Y	H	G	G	H	G	H	G	G	H	H	Y	G	H	Y	G	G	H	G	H	G	G	H	G	H	H	H	G	-	H	H	H	H	H	H	G	H	G	H
AX-183589601	I	4.72	Chr2	5378450	2.61e-29	chr2LG1	4911064			H	Y	H	G	G	H	G	Y	G	G	H	H	H	G	H	Y	G	G	H	G	H	G	G	H	G	H	H	H	G	Y	H	H	H	H	H	H	G	H	G	H
AX-183589605	I	4.72	Chr2	5418750	2.61e-29	chr2LG1	4960431			H	Y	H	G	G	H	G	Y	G	G	H	H	H	G	H	Y	G	-	H	G	-	G	G	H	G	H	H	H	G	Y	H	H	H	H	H	H	G	H	G	H
AX-183564118	I	4.72	Chr2	5420397	1.22e-27	chr2LG1	4962078			H	Y	H	G	G	H	G	Y	G	G	H	H	H	G	H	Y	G	G	H	G	H	G	G	H	G	H	H	H	G	Y	H	H	H	H	H	H	G	H	G	H
AX-183884422	I	4.72	Chr2	5420458	2.61e-29	chr2LG1	4962139			H	Y	H	G	G	H	G	Y	G	G	H	H	H	G	H	Y	G	G	H	G	H	G	G	H	G	H	H	H	G	Y	H	H	H	H	H	H	G	H	G	H
AX-183865164	I	4.84	Chr2	5541833	1.22e-27	chr2LG1	5094625			H	Y	H	G	G	H	G	Y	G	G	H	H	H	G	H	Y	G	G	H	G	H	G	G	H	G	H	H	H	G	Y	H	H	H	H	H	H	G	H	G	H
AX-183861677	I	4.84	Chr2	5542356	5.65e-26	chr2LG1	5095148			H	Y	H	G	G	H	G	Y	G	G	H	H	H	G	H	Y	G	G	H	G	H	G	G	H	G	H	H	H	G	-	H	H	H	H	H	H	G	H	G	H
AX-183575877	I	4.84	Chr2	5542784	1.22e-27	chr2LG1	5095576			H	Y	H	G	G	H	G	Y	G	G	H	H	H	G	H	Y	G	G	H	G	H	G	G	H	G	H	H	H	G	Y	H	H	H	H	H	H	G	H	G	H
AX-183589606	I	4.84	Chr2	5546563	1.22e-27	chr2LG1	5099376			H	Y	H	G	G	H	G	Y	G	G	H	H	H	G	H	Y	G	G	H	G	H	G	G	H	G	H	H	H	G	Y	H	H	H	H	H	H	G	H	G	H
AX-183564120	I	4.84	Chr2	5736046	2.61e-29	chr2LG1	5229215			H	Y	H	G	G	H	G	Y	G	G	H	H	H	G	H	Y	G	G	H	G	H	G	G	H	G	H	H	H	G	Y	H	H	H	H	H	H	G	H	G	H
AX-183575880	I	4.84	Chr2	5737778	1.22e-27	chr2LG1	5230947			H	Y	H	G	G	H	G	Y	G	G	H	H	H	G	H	Y	G	G	H	G	H	G	G	H	G	H	H	H	G	Y	H	H	H	H	H	H	G	H	G	H
AX-183879531	I	4.84	Chr2	5738332	2.61e-29	chr2LG1	5231501			H	Y	H	G	G	H	G	Y	G	G	H	H	H	G	H	Y	G	G	H	G	H	G	G	H	G	H	H	H	G	Y	H	H	H	H	H	H	G	H	G	H
AX-183861610	I	4.84	Chr2	5740532	1.22e-27	chr2LG1	5234258			H	Y	H	G	G	H	G	Y	G	G	H	H	H	G	H	Y	G	G	H	G	H	G	G	H	G	H	H	H	G	Y	H	H	H	H	H	H	G	H	G	H
AX-183891667	I	4.84	Chr2	5740714	1.22e-27	chr2LG1	5234440			H	Y	H	G	G	H	G	Y	G	G	H	H	H	G	H	Y	G	G	H	G	H	G	G	H	G	H	H	H	G	Y	H	H	H	H	H	H	G	H	G	H
AX-183575881	I	4.97	Chr2	5773458	1.22e-27	chr2LG1	5267622			H	H	H	G	G	H	G	Y	G	G	H	H	H	G	H	Y	G	G	H	G	H	G	G	H	G	H	H	H	G	Y	H	H	H	H	H	H	G	H	G	H
AX-183564122	I	5.21	Chr2	5881885	1.22e-27	chr2LG1	5578228			H	H	H	G	G	H	G	Y	G	H	H	H	H	G	H	Y	-	G	H	G	H	G	G	H	G	H	H	H	-	Y	H	H	H	H	H	H	G	H	G	H
AX-183864498	I	5.21	Chr2	5884661	1.22e-27	chr2LG1	5581004			H	H	H	G	G	H	G	Y	G	G	H	H	H	G	H	Y	G	G	H	G	H	G	G	H	G	H	H	H	G	Y	H	H	H	H	H	H	G	H	G	H
AX-183869697	I	5.21	Chr2	5885690	2.61e-29	chr2LG1	5582033			H	H	H	G	G	H	G	Y	G	G	H	H	H	G	H	Y	G	G	H	G	H	G	G	H	G	H	H	H	G	Y	H	H	H	H	H	H	G	H	G	H
AX-183861998	I	5.21	Chr2	5885732	2.61e-29	chr2LG1	5582075			H	H	H	G	G	H	G	Y	G	G	H	H	H	G	H	Y	G	G	H	G	H	G	G	H	G	H	H	H	G	Y	H	H	H	H	H	H	G	H	G	H
AX-183573135	I	5.21	Chr2	5885797	1.22e-27	chr2LG1	5582140			H	H	H	G	G	H	G	Y	G	G	H	H	H	G	H	Y	G	G	H	G	H	G	G	H	G	H	H	H	G	Y	H	H	H	H	H	H	G	H	G	H
AX-183589618	I	5.21	Chr2	5890906	1.22e-27	chr2LG1	5587274			H	H	H	G	G	H	G	Y	G	G	H	H	H	G	H	Y	G	G	H	G	H	G	G	H	G	H	H	H	G	Y	H	H	H	H	H	H	G	H	G	H
AX-183589619	I	5.21	Chr2	5894433	2.61e-29	chr2LG1	5590801			H	H	H	G	G	H	G	Y	G	G	H	H	H	G	H	Y	G	G	H	G	H	G	G	H	G	H	H	H	G	Y	H	H	H	H	H	H	G	H	G	H
AX-183575882	I	5.21	Chr2	6016166	5.65e-26	chr2LG1	5665801			H	H	H	G	G	H	G	Y	G	G	H	H	H	G	H	Y	G	G	H	G	H	G	G	-	G	H	H	H	G	Y	H	H	H	H	H	H	G	H	G	H
AX-183575883	I	5.84	Chr2	6518110	2.61e-29	chr2LG1	5720552			H	H	H	G	G	H	G	Y	G	G	H	H	H	G	H	Y	G	G	H	G	H	G	G	H	G	H	H	H	G	Y	H	H	H	H	H	H	G	H	G	H
AX-183573137	I	5.96	Chr2	6645631	1.22e-27	chr2LG1	5774678			H	H	H	G	G	H	G	Y	G	G	H	H	H	G	H	Y	G	G	H	G	H	G	G	H	G	H	H	H	G	Y	H	H	H	H	H	H	G	H	G	Y
AX-183564125	I	5.96	Chr2	6647261	2.61e-29	chr2LG1	5776307			H	H	H	G	G	H	G	Y	G	G	H	H	H	G	H	Y	G	G	H	G	H	G	G	H	G	H	H	H	G	Y	H	H	H	H	H	H	G	H	G	Y
AX-183575885	I	6.09	Chr2	7564089	2.61e-29	chr2LG1	6370125			H	H	H	G	G	H	G	Y	G	G	H	H	H	G	H	Y	G	G	H	G	H	G	G	H	G	H	H	H	G	Y	H	H	H	H	H	H	G	H	G	Y
AX-183638280	I	6.09	Chr2	7645233	1.22e-27	chr2LG1	6433271			H	H	H	G	G	H	G	Y	G	G	H	H	H	G	H	Y	G	-	H	G	H	G	G	H	G	H	H	H	G	Y	H	H	H	H	H	H	G	H	G	Y
AX-183589629	I	6.09	Chr2	7648391	2.61e-29	chr2LG1	6436429			H	H	H	G	G	H	G	Y	G	G	H	H	H	G	H	Y	G	G	H	G	H	G	G	H	G	H	H	H	G	Y	H	H	H	H	H	H	G	H	G	Y
AX-183575886	I	6.09	Chr2	7649096	1.22e-27	chr2LG1	6437134			H	H	H	G	G	H	G	Y	G	G	H	H	H	G	H	Y	G	G	H	G	H	G	G	H	G	H	H	H	G	Y	H	H	H	H	H	H	G	H	G	Y
AX-183575887	I	6.09	Chr2	7915973	2.61e-29	chr2LG1	6546056			H	H	H	G	G	H	G	Y	G	G	H	H	H	G	H	Y	G	G	H	G	H	G	G	H	G	H	H	H	G	Y	H	H	H	H	H	H	G	H	G	Y
AX-183564127	I	6.33	Chr2	7944041	1.22e-27	chr2LG1	6562671			H	H	H	G	G	H	G	Y	G	G	H	H	H	G	H	Y	G	G	H	G	H	G	G	H	G	H	H	H	G	Y	H	H	H	H	H	H	G	H	G	Y
AX-183861049	I	6.46	Chr2	8119608	1.22e-27	chr2LG1	6682218			H	H	H	G	G	H	G	Y	G	G	H	H	H	G	H	Y	G	G	H	G	H	G	G	H	G	H	H	H	G	H	H	H	H	H	H	H	G	H	G	Y
AX-183564128	I	6.46	Chr2	8125005	1.22e-27	chr2LG1	6687674			H	H	H	G	G	H	G	Y	G	G	H	H	H	G	H	Y	G	G	H	G	H	G	G	H	G	H	-	H	G	Y	H	H	H	H	H	H	G	H	G	Y
AX-183575891	I	6.46	Chr2	8137749	1.22e-27	chr2LG1	6716883			H	H	H	G	G	H	G	Y	G	G	H	H	H	G	H	Y	G	G	H	G	H	G	G	H	G	H	H	H	G	Y	H	H	H	H	H	H	G	H	G	Y
AX-183573655	I	6.46	Chr2	8202929	1.22e-27	chr2LG1	6787536			H	H	H	G	G	H	G	Y	G	G	H	H	H	G	H	Y	G	G	H	G	H	G	G	H	G	H	H	H	G	Y	H	H	H	H	H	H	G	H	G	Y
AX-183573656	I	6.46	Chr2	8229550	1.22e-27	chr2LG1	6809625			H	H	H	G	G	H	G	Y	G	G	H	H	H	G	H	Y	G	G	H	G	H	G	G	H	G	H	H	H	G	-	H	H	H	H	H	H	G	H	G	Y
AX-183865245	I	6.58	Chr2	8294378	2.61e-29	chr2LG1	6919124			H	H	H	G	G	H	G	-	G	G	H	H	H	G	H	Y	G	G	H	G	H	G	-	H	G	H	H	H	G	Y	H	H	H	H	H	H	G	H	G	Y
AX-183564131	I	6.58	Chr2	8294468	5.65e-26	chr2LG1	6919214			H	H	H	G	G	H	G	Y	G	G	H	H	H	G	H	Y	G	G	H	G	H	G	G	H	G	H	H	H	G	Y	H	H	H	H	H	H	G	H	G	Y
AX-183861398	I	6.58	Chr2	8294839	1.22e-27	chr2LG1	6919585			H	H	H	G	G	H	G	Y	G	G	H	H	H	G	H	Y	G	G	H	G	H	G	G	H	G	H	H	H	G	Y	H	H	H	H	H	H	G	H	G	Y
AX-183573141	I	6.58	Chr2	8330366	1.22e-27	chr2LG1	6935348			H	H	H	G	G	H	G	Y	G	G	H	H	H	G	H	Y	G	G	H	G	H	G	G	H	G	H	H	H	G	Y	H	H	H	H	H	H	G	H	G	Y
AX-183876514	I	6.83	Chr2	8395669	1.22e-27	chr2LG1	6957042			H	H	H	G	G	H	G	Y	G	G	H	H	H	G	H	Y	G	G	H	G	H	G	G	H	G	H	H	H	G	-	H	H	H	H	H	H	G	H	G	Y
AX-183877020	I	6.83	Chr2	8543687	1.22e-27	chr2LG1	7052618			H	H	H	G	G	H	G	Y	G	G	H	H	H	G	H	Y	G	G	H	G	H	G	G	H	G	H	H	H	G	Y	H	H	H	H	H	H	G	H	G	Y
AX-183573661	I	7.2	Chr2	8958193	1.22e-27	chr2LG1	7367351			H	H	H	G	G	H	G	-	G	G	H	H	H	G	H	Y	G	G	H	G	H	G	G	H	G	H	H	H	G	Y	H	H	H	H	H	H	G	H	G	Y
AX-183573662	I	7.2	Chr2	8961986	2.61e-29	chr2LG1	7371144			H	H	H	G	G	H	G	Y	G	G	H	H	H	G	H	Y	G	G	H	G	H	G	G	H	G	H	H	H	G	Y	H	H	H	H	H	H	G	H	G	Y
AX-183573658	I	7.2	Chr2	8995144	2.61e-29	chr2LG1	7759483			H	H	H	G	G	H	G	H	G	G	H	H	H	G	H	Y	G	G	H	G	H	G	G	H	G	H	H	H	G	Y	H	H	H	H	H	H	G	H	G	Y
AX-183564132	I	7.2	Chr2	8997796	2.61e-29	chr2LG1	7762135			H	H	H	G	G	H	G	Y	G	G	H	H	H	G	H	Y	G	G	H	G	H	G	G	H	G	H	H	H	G	Y	H	H	H	H	H	H	G	H	G	Y
AX-183573659	I	7.2	Chr2	9001019	2.61e-29	chr2LG1	7765358			H	H	H	G	G	H	G	Y	G	H	H	H	H	G	H	Y	G	G	H	G	H	G	G	H	G	H	H	H	G	Y	H	H	H	H	H	H	G	H	G	Y
AX-183875143	I	7.2	Chr2	9001955	1.22e-27	chr2LG1	7766294			H	H	H	G	G	H	G	Y	G	G	H	H	H	G	H	Y	G	G	H	G	H	G	G	H	G	H	H	H	G	Y	H	H	H	H	H	H	G	H	G	Y
AX-183575045	I	7.2	Chr2	9031937	2.61e-29	chr2LG1	8028140			H	H	H	G	G	H	G	Y	G	G	H	H	H	G	H	Y	-	G	H	G	H	G	G	H	G	H	H	H	G	Y	H	H	H	H	H	H	G	H	G	Y
AX-183892104	I	7.2	Chr2	9099289	2.61e-29	chr2LG1	7960179			H	H	H	G	G	H	G	-	G	G	H	H	H	G	H	Y	-	-	H	G	H	G	G	H	-	-	H	H	G	Y	H	H	H	H	H	H	-	H	G	Y
AX-183589664	I	7.2	Chr2	9100598	2.61e-29	chr2LG1	7958870			H	H	H	G	G	H	G	Y	G	G	H	H	H	G	H	Y	G	G	H	G	H	G	G	H	G	H	H	H	G	Y	H	H	H	H	H	H	G	H	G	Y
AX-183589669	I	7.33	Chr2	9124673	2.61e-29	chr2LG1	7934832			H	H	H	G	G	H	G	Y	G	G	H	H	H	G	H	Y	G	G	H	G	H	G	G	H	G	H	H	H	G	Y	H	H	H	Y	H	H	G	H	G	Y
AX-183575048	I	7.33	Chr2	9192736	2.61e-29	chr2LG1	7874340			H	H	H	G	G	H	G	Y	G	G	H	H	H	G	H	Y	G	G	H	G	H	G	G	H	G	H	H	H	G	Y	H	H	H	Y	H	H	G	H	G	Y
AX-183575893	I	7.33	Chr2	9194218	1.22e-27	chr2LG1	7872774			H	H	H	G	G	H	G	Y	G	G	H	H	H	G	H	Y	G	G	H	G	H	G	G	H	G	H	H	H	G	Y	H	H	H	Y	H	H	G	H	G	Y
AX-183564133	I	7.45	Chr2	9223903	1.22e-27	chr2LG1	7845825			H	H	H	G	G	H	G	Y	G	G	H	H	H	G	H	Y	G	G	H	G	H	G	G	H	G	H	H	H	G	Y	H	H	H	Y	H	H	G	H	G	Y
AX-183877476	I	7.57	Chr2	9232008	1.22e-27	chr2LG1	7838931			H	H	H	G	-	H	G	Y	G	G	H	H	H	G	H	Y	G	-	H	G	H	G	-	H	G	H	H	H	G	Y	H	H	H	Y	H	H	G	H	G	Y
AX-183564134	I	7.57	Chr2	9257289	2.61e-29	chr2LG1	7813550			H	H	H	G	G	H	G	Y	G	G	H	H	H	G	H	Y	G	G	H	G	H	G	G	H	G	H	H	H	G	H	H	H	H	Y	H	H	G	H	G	Y
AX-183575899	I	10.11	Chr2	12322483	1.22e-27	chr2LG1	9486373			H	H	Y	G	G	H	G	H	G	G	H	H	H	G	Y	Y	G	-	H	G	H	H	G	H	G	H	H	H	G	Y	H	H	H	Y	H	H	G	H	G	Y
AX-183564140	I	10.11	Chr2	12336201	2.61e-29	chr2LG1	9500114			H	H	Y	G	G	H	G	Y	G	G	-	H	-	G	Y	Y	G	G	H	G	H	H	G	H	G	H	H	H	G	-	H	H	H	Y	H	H	G	H	G	Y
AX-183867731	I	11.88	Chr2	14110063	2.61e-29	scaffold01523	358807			H	H	Y	G	G	G	G	H	G	G	H	H	Y	G	Y	Y	G	H	H	G	H	H	G	H	G	-	Y	H	G	Y	H	H	H	Y	H	H	G	H	G	Y
AX-183564169	I	11.88	Chr2	15064751	2.61e-29	chr2LG1	11390441			H	H	Y	G	G	G	G	Y	G	G	H	H	Y	G	Y	Y	G	G	H	G	H	H	G	H	G	H	H	H	G	Y	H	H	H	Y	H	H	G	H	G	Y
AX-183575914	I	12.12	Chr2	15067197	1.22e-27	chr2LG1	11392887			H	H	Y	G	G	G	G	Y	G	G	H	H	Y	G	Y	Y	G	G	H	G	H	H	G	H	G	H	H	H	G	Y	H	H	H	Y	H	H	G	H	G	Y
AX-183638303	I	12.12	Chr2	15301997	2.61e-29	chr2LG1	11608317			H	H	-	G	G	G	G	Y	G	G	-	H	Y	G	Y	Y	G	H	H	G	-	H	G	-	G	H	H	H	G	Y	H	H	H	Y	H	H	G	H	G	Y
AX-183564170	I	12.12	Chr2	15333477	2.61e-29	chr2LG1	11639972			H	H	Y	G	G	G	G	Y	G	G	H	H	-	G	Y	Y	G	G	H	G	H	H	-	G	G	H	-	H	G	Y	H	H	H	Y	H	H	G	H	G	Y
AX-183861932	I	12.62	Chr2	15728922	1.22e-27	chr2LG1	11821566			H	H	Y	G	G	G	G	H	G	H	H	H	-	G	Y	Y	G	G	H	G	H	H	G	H	G	H	H	H	G	-	H	H	H	Y	H	H	G	H	G	Y
AX-183865482	I	12.62	Chr2	15745765	1.22e-27	chr2LG1	11844492			H	H	Y	G	G	G	G	H	G	H	H	H	Y	G	Y	Y	G	G	H	G	H	H	G	H	G	H	H	H	G	Y	H	H	H	Y	H	H	G	H	G	Y
AX-183573473	I	12.75	Chr2	15765728	2.61e-29	chr2LG1	11872873			H	H	Y	G	-	G	G	H	G	H	H	H	Y	G	Y	Y	G	G	H	G	H	H	G	H	G	H	-	H	G	Y	H	H	H	Y	H	H	G	H	G	Y
AX-183589706	I	12.75	Chr2	15765896	2.61e-29	chr2LG1	11873041			H	H	Y	G	G	G	G	H	G	H	H	H	Y	G	Y	Y	G	G	H	G	H	H	G	H	G	H	H	H	G	-	H	H	H	Y	H	H	G	H	G	Y
AX-183575905	I	12.75	Chr2	15767274	1.22e-27	chr2LG1	11874431			H	H	Y	G	G	G	G	H	G	H	H	H	Y	G	Y	Y	G	G	H	G	H	H	G	H	G	H	H	H	G	Y	H	H	H	Y	H	H	G	H	G	Y
AX-183573481	I	12.99	Chr2	15958410	1.22e-27	chr2LG1	12177300			H	H	Y	G	G	G	G	H	G	H	H	Y	Y	G	Y	Y	G	G	H	G	H	H	G	H	G	H	H	H	G	Y	H	H	H	Y	G	H	G	H	G	Y
AX-183589760	I	13.37	Chr2	16240344	1.22e-27	chr2LG1	12369118			H	H	Y	G	G	G	G	H	G	H	H	Y	Y	G	Y	Y	G	G	H	G	H	H	G	H	G	H	H	H	G	-	H	H	H	Y	G	H	G	H	G	Y
AX-183870518	I	13.37	Chr2	16241255	1.22e-27	chr2LG1	12370007			H	H	Y	G	G	G	G	H	G	H	H	Y	Y	G	Y	Y	G	G	H	G	H	H	G	H	G	H	H	H	G	Y	H	H	H	Y	G	H	G	H	G	Y
AX-183564172	I	13.37	Chr2	16243259	1.22e-27	chr2LG1	12372006			H	H	Y	G	G	G	G	H	G	H	H	Y	H	G	Y	Y	G	G	H	G	H	H	G	H	G	H	H	H	G	Y	H	H	H	Y	G	H	G	H	G	Y
AX-183865938	I	13.37	Chr2	16262209	1.22e-27	chr2LG1	12401000			H	H	Y	G	-	G	G	H	G	H	H	Y	Y	G	Y	Y	G	G	H	G	H	H	G	H	G	H	H	H	G	Y	H	H	G	Y	G	H	G	H	G	Y
AX-183885529	I	13.37	Chr2	16264096	2.61e-29	chr2LG1	12402884			H	H	Y	G	G	G	G	H	G	H	H	Y	Y	G	Y	Y	G	G	H	G	H	H	G	H	G	H	H	H	G	Y	H	H	H	Y	G	H	G	H	G	Y
AX-183564158	I	13.49	JAMSHJ010000172.1	53141	1.22e-27	chr2LG1	13811591			H	H	Y	G	G	G	G	H	G	H	H	Y	Y	G	Y	Y	G	G	H	G	H	H	-	H	G	H	H	H	G	-	H	H	H	Y	G	H	G	H	G	Y
AX-183589720	I	13.49	JAMSHJ010000172.1	53376	2.61e-29	chr2LG1	13811826			H	H	Y	G	G	G	G	H	G	H	H	Y	-	G	Y	Y	G	-	H	G	H	H	G	H	G	H	H	H	G	Y	H	H	H	Y	G	H	G	H	G	Y
AX-183589725	I	13.49	Chr2	16555436	5.65e-26	chr2LG1	13967887			H	H	Y	G	G	G	G	H	G	H	H	Y	-	G	-	Y	G	H	H	G	H	H	G	H	G	H	H	H	G	-	H	-	H	-	G	H	G	H	G	Y
AX-183589728	I	13.49	Chr2	16560764	5.65e-26	chr2LG1	13973239			H	H	Y	-	G	G	G	H	G	H	H	Y	Y	G	Y	Y	G	G	H	G	H	H	G	H	G	Y	-	H	G	-	H	H	-	Y	G	H	G	H	G	Y
AX-183884426	I	13.49	Chr2	16576376	1.22e-27	chr2LG1	13983974			H	H	Y	G	G	G	G	H	G	H	H	Y	Y	G	Y	Y	G	G	H	G	H	H	G	H	G	H	H	H	G	H	H	H	H	-	G	H	G	H	G	Y
AX-183573482	I	13.61	Chr2	16620025	2.63e-24	chr2LG1	14025552			H	H	Y	G	G	G	G	H	G	H	H	Y	-	G	Y	Y	G	G	H	G	H	H	G	H	G	H	H	H	G	Y	H	H	H	Y	G	H	G	H	G	Y
AX-183589762	I	13.61	Chr2	16620121	2.61e-29	chr2LG1	14025648			H	H	Y	G	G	G	G	H	G	H	H	Y	-	G	Y	-	G	G	H	G	H	H	G	H	G	H	H	H	G	Y	H	H	H	Y	G	H	G	H	G	Y
AX-183564152	I	13.86	Chr2	17761892	2.61e-29	chr2LG1	13122907			H	H	Y	G	G	G	G	H	G	H	H	Y	Y	G	Y	Y	G	G	H	G	H	H	G	H	G	H	H	H	G	Y	H	H	H	Y	G	H	G	H	G	Y
AX-183573475	I	13.86	Chr2	17762351	2.61e-29	chr2LG1	13123366			H	H	Y	G	G	G	G	H	-	H	H	Y	-	G	Y	Y	G	G	H	G	H	H	G	H	G	H	H	H	G	Y	H	H	H	Y	G	H	G	H	G	Y
AX-183575907	I	13.86	Chr2	17777729	1.22e-27	chr2LG1	13138744			H	H	Y	G	G	G	G	H	G	H	H	Y	Y	G	Y	Y	G	-	H	G	H	H	G	H	G	H	H	H	G	Y	H	H	H	Y	G	H	G	H	G	Y
AX-183589770	I	13.86	Chr2	18031800	1.22e-27	chr2LG1	13503703			H	H	Y	G	G	G	G	H	G	H	H	Y	Y	G	Y	Y	G	G	H	G	H	H	G	H	G	H	G	H	G	H	H	H	H	Y	G	H	G	H	G	Y
AX-183575924	I	14.11	Chr2	18303363	1.22e-27	chr2LG1	13709687			H	H	Y	G	G	G	G	H	G	H	H	Y	Y	G	Y	Y	G	G	H	G	H	H	G	H	G	H	-	H	G	Y	H	H	H	Y	G	H	G	H	G	Y
AX-183573143	I	14.11	Chr2	18307013	1.22e-27	chr2LG1	13713337			H	H	Y	G	G	G	G	H	G	H	H	Y	Y	G	Y	Y	G	G	H	G	H	H	G	H	G	H	H	H	G	Y	H	H	-	Y	G	H	G	H	G	Y
AX-183589775	I	14.11	Chr2	18313258	1.22e-27	chr2LG1	13719757			H	H	Y	G	G	G	G	H	G	H	H	Y	Y	G	Y	Y	G	G	H	G	H	H	G	H	G	H	-	H	G	Y	H	H	H	Y	G	H	G	H	G	Y
AX-183582350	I	14.11	Chr2	18489449	1.22e-27	scaffold01339	39023			H	H	-	G	G	G	G	H	G	H	H	Y	H	G	H	Y	G	-	H	G	H	H	G	H	G	H	-	H	G	H	H	H	H	Y	G	H	G	H	G	Y
AX-183575922	I	14.11	Chr2	18748258	1.22e-27	chr2LG1	13291143			H	H	Y	G	G	G	G	H	G	H	H	Y	Y	G	Y	Y	G	G	H	G	H	H	G	H	G	H	G	H	G	Y	H	H	H	Y	G	H	G	H	G	Y
AX-183589764	I	14.11	Chr2	19089230	2.61e-29	chr2LG1	14665619			H	H	-	G	G	G	G	H	G	H	H	Y	-	G	-	Y	G	G	H	G	H	H	G	-	G	H	G	H	G	Y	H	H	H	H	G	H	G	H	G	Y
AX-183563125	I	14.11	Chr2	19101652	2.61e-29	chr2LG1	14678041			H	H	Y	G	G	G	G	H	G	H	H	Y	-	G	Y	Y	G	G	H	G	H	H	G	H	G	H	G	H	G	-	H	H	H	Y	G	H	G	H	G	Y
AX-183865107	I	14.36	Chr2	19148094	1.22e-27	chr2LG1	14725326			H	H	Y	G	G	G	G	H	G	H	H	Y	-	G	Y	Y	G	H	H	G	H	H	G	H	G	H	G	H	G	Y	H	H	H	Y	G	H	G	H	G	Y
AX-183868163	I	14.61	Chr2	20061166	1.22e-27	chr2LG1	15003474			H	H	Y	G	G	G	G	H	G	H	H	Y	H	G	Y	Y	G	G	H	G	H	H	G	H	G	H	G	H	G	Y	H	H	H	Y	G	H	G	H	G	Y
AX-183564178	I	14.98	Chr2	20150087	2.61e-29	chr2LG1	14937233			H	H	Y	G	G	G	G	-	G	H	H	Y	Y	G	H	Y	G	G	H	G	H	H	G	H	G	H	-	H	G	Y	H	H	H	Y	G	H	G	H	G	Y
AX-183575925	I	14.98	Chr2	20153261	2.61e-29	chr2LG1	14940515			H	H	-	G	G	G	G	H	G	H	H	Y	-	G	H	Y	G	G	H	G	H	H	H	H	G	H	-	H	G	Y	H	H	H	Y	G	H	G	G	G	Y
AX-183564180	I	14.98	Chr2	20166169	1.22e-27	chr2LG1	14953361			H	H	Y	G	G	G	G	H	G	H	H	Y	Y	G	H	Y	G	G	H	G	H	H	G	H	G	H	G	H	G	Y	H	H	H	Y	G	H	G	H	G	Y
AX-183862273	I	14.98	Chr2	20202350	1.22e-27	chr2LG1	15546311			H	H	Y	G	G	G	G	-	G	H	H	Y	-	G	H	Y	G	G	-	G	H	H	G	H	G	H	G	H	G	Y	H	H	H	Y	G	H	G	H	G	Y
AX-183886023	I	14.98	Chr2	20203223	1.22e-27	chr2LG1	15545438			H	H	Y	G	G	G	G	H	G	H	H	Y	Y	G	H	Y	G	G	H	G	H	H	G	H	G	H	G	H	G	Y	H	H	-	Y	G	H	G	H	G	Y
AX-183573147	I	14.98	Chr2	20235806	2.61e-29	chr2LG1	15523261			H	H	Y	G	G	G	G	H	G	H	H	Y	Y	G	H	Y	G	G	H	G	H	H	G	H	G	H	G	H	G	Y	H	H	H	Y	G	H	G	H	G	Y
AX-183575926	I	14.98	Chr2	20249420	1.22e-27	chr2LG1	15509647			H	H	Y	G	G	G	G	H	G	H	H	Y	Y	G	H	Y	G	G	H	G	H	H	G	H	G	H	G	H	G	Y	H	H	-	Y	G	H	G	H	G	Y
AX-183564183	I	15.23	Chr2	20334295	2.61e-29	chr2LG1	15407578			H	H	Y	G	G	G	G	H	G	H	H	Y	Y	-	H	Y	G	G	H	G	-	H	H	H	G	H	G	H	G	Y	H	H	H	Y	G	H	G	H	G	Y
AX-183867226	I	15.23	Chr2	20369983	2.61e-29	chr2LG1	16279683			H	H	Y	G	G	G	G	H	G	H	H	Y	Y	G	H	Y	G	G	H	G	H	H	G	H	G	H	H	H	G	Y	H	H	H	Y	G	H	G	H	G	Y
AX-183564182	I	15.23	Chr2	20382449	5.65e-26	chr2LG1	16246107			H	H	Y	G	G	G	G	H	G	H	H	Y	Y	G	H	Y	G	G	H	G	H	H	G	H	G	H	G	H	G	Y	H	H	H	Y	G	H	G	H	G	Y
AX-183880053	I	15.6	Chr2	21302211	1.22e-27	scaffold01569	9223			H	H	Y	G	G	G	G	H	G	H	H	Y	Y	G	H	Y	G	G	H	G	H	H	G	H	G	H	G	H	G	Y	H	H	H	Y	G	H	G	H	G	Y
AX-183638305	I	15.6	Chr2	21304596	9.39e-29	scaffold01569	11608			H	H	-	G	G	G	G	H	G	H	H	Y	Y	G	H	Y	G	G	H	G	H	H	G	H	G	H	G	H	G	Y	H	H	H	Y	G	H	G	H	G	Y
AX-183589793	I	15.6	Chr2	21318368	7.31e-25	scaffold01569	46689			H	H	Y	G	G	G	G	H	G	H	H	Y	Y	G	H	Y	G	G	H	G	H	H	G	H	G	H	G	H	G	Y	H	H	H	Y	G	H	G	H	G	Y
AX-183869827	I	15.6	Chr2	21344478	2.61e-29	scaffold01569	51422			H	H	Y	G	G	G	G	H	G	H	H	-	Y	G	H	Y	G	G	H	G	H	H	G	H	G	H	-	H	G	Y	H	H	H	Y	G	H	G	H	G	Y
AX-183564187	I	15.6	Chr2	21476578	1.22e-27	chr2LG1	16451460			H	H	Y	G	G	G	G	H	G	H	H	Y	H	G	H	Y	G	G	H	G	H	H	G	H	G	H	G	H	G	Y	H	H	H	Y	G	H	G	H	G	Y
AX-183575928	I	15.72	Chr2	21482895	1.22e-27	chr2LG1	16458633			H	H	Y	G	G	G	G	H	G	H	H	Y	Y	G	H	Y	G	G	H	G	H	H	G	H	G	H	G	H	G	Y	H	H	H	Y	G	H	G	H	G	Y
AX-183865804	I	15.72	Chr2	21526831	2.61e-29	chr2LG1	16497798			H	H	Y	G	G	G	G	H	G	H	H	Y	H	G	H	Y	G	G	H	G	H	H	G	H	G	H	G	H	G	Y	H	H	H	Y	G	H	G	H	G	Y
AX-183564190	I	15.97	Chr2	22134632	1.22e-27	chr2LG1	17638580			H	H	Y	G	G	G	G	H	G	H	H	Y	Y	G	H	Y	H	G	H	G	H	H	G	H	G	H	G	H	G	Y	H	H	H	Y	G	H	G	H	G	Y
AX-183866309	I	15.97	Chr2	22202202	1.22e-27	chr2LG1	16843176			H	H	Y	G	G	G	G	H	G	H	H	Y	-	G	H	Y	H	G	H	G	H	H	G	H	G	H	G	H	G	-	H	H	H	Y	G	H	G	H	G	Y
AX-183872220	I	16.1	Chr2	22203294	1.22e-27	chr2LG1	16844268			H	H	Y	G	G	G	G	H	G	H	H	Y	Y	G	H	Y	H	H	H	G	H	H	G	H	G	H	H	H	G	Y	H	H	H	Y	G	H	G	H	H	Y
AX-183861933	I	16.1	Chr2	22206367	1.22e-27	chr2LG1	16847341			H	H	Y	G	G	G	G	H	G	H	H	Y	-	G	H	Y	H	G	H	G	H	H	G	H	G	H	H	H	G	-	H	H	H	Y	G	H	G	H	G	Y
AX-183589808	I	16.1	Chr2	22206438	2.61e-29	chr2LG1	16847412			H	H	Y	G	G	G	G	H	G	H	H	Y	Y	G	H	Y	H	G	H	G	H	H	G	H	G	H	G	H	G	Y	H	H	-	Y	G	H	G	H	G	Y
AX-183883380	I	16.1	Chr2	22213162	1.22e-27	chr2LG1	16853916			H	H	Y	G	G	G	G	H	G	H	H	Y	Y	G	H	Y	H	G	H	G	H	H	G	H	G	H	G	H	G	H	H	H	H	Y	G	H	G	H	G	Y
AX-183883894	I	16.1	Chr2	22213428	1.22e-27	chr2LG1	16854182			H	H	Y	G	G	G	G	H	G	H	H	Y	Y	G	H	Y	H	G	H	G	H	H	G	H	G	H	-	H	G	Y	H	H	H	Y	G	H	G	H	G	Y
AX-183867760	I	16.1	Chr2	22213578	1.22e-27	chr2LG1	16854332			H	H	Y	G	G	G	G	H	G	H	H	Y	Y	G	H	Y	H	G	H	G	H	H	G	H	G	H	G	H	G	Y	H	H	H	Y	G	H	G	H	G	Y
AX-183861429	I	16.1	Chr2	22253501	1.22e-27	chr2LG1	16941325			H	H	Y	G	G	G	G	H	G	H	H	Y	Y	G	H	Y	H	G	H	G	H	H	G	H	G	H	G	H	G	Y	H	H	H	Y	G	H	G	H	G	Y
AX-183563130	I	16.59	Chr2	22658875	1.22e-27	chr2LG1	17151825			H	H	Y	G	G	G	G	H	G	H	G	Y	Y	G	H	Y	H	G	H	G	H	H	G	H	G	H	G	H	G	Y	H	H	H	Y	G	H	G	H	G	Y
AX-183575932	I	16.59	Chr2	22660004	2.61e-29	chr2LG1	17152954			H	H	Y	G	G	G	G	H	G	H	G	Y	Y	G	H	Y	H	G	H	G	H	H	G	H	G	H	-	H	G	Y	H	H	H	Y	G	H	G	H	G	Y
AX-183865565	I	16.59	Chr2	22660702	2.61e-29	chr2LG1	17153652			H	H	Y	G	G	G	G	H	G	H	G	Y	-	G	H	Y	H	-	H	G	H	H	G	H	G	H	-	H	G	-	H	H	H	Y	G	H	G	H	G	Y
AX-183863152	I	16.84	Chr2	22969819	1.22e-27	chr2LG1	17441709			H	H	Y	G	G	G	G	H	G	H	G	Y	Y	G	H	Y	H	G	H	G	H	H	G	H	G	H	-	H	G	Y	H	H	H	Y	H	H	G	H	G	Y
AX-183575934	I	16.84	Chr2	23047780	2.61e-29	chr2LG1	17525388			H	H	Y	G	G	G	G	H	G	H	G	Y	Y	G	H	Y	H	-	H	G	H	H	G	H	G	H	G	H	G	Y	H	H	H	Y	H	H	G	H	G	Y
AX-183860528	I	16.84	Chr2	23377927	2.61e-29	chr2LG1	18368792			H	H	Y	G	G	G	G	H	G	H	G	Y	Y	G	H	Y	H	-	H	G	H	H	G	H	G	H	-	H	G	Y	H	H	H	Y	H	H	G	H	G	Y
AX-183564196	I	16.84	Chr2	23380127	1.22e-27	chr2LG1	18370985			H	H	Y	G	G	G	G	H	G	H	G	Y	Y	G	H	Y	H	G	H	G	H	H	G	H	G	H	G	H	G	-	H	H	H	Y	H	H	G	H	G	Y
AX-183575939	I	16.84	Chr2	23519182	5.65e-26	chr2LG1	18554199			H	H	Y	G	G	G	G	H	G	H	G	Y	Y	G	H	Y	H	-	H	G	H	H	G	H	G	H	G	H	G	Y	H	H	H	Y	H	H	G	H	G	Y
AX-183575936	I	16.97	Chr2	24385656	2.61e-29	chr2LG1	17938706			H	H	Y	G	G	G	G	H	G	H	G	Y	-	G	H	Y	H	-	H	G	H	H	G	H	G	H	-	H	G	Y	H	H	H	Y	H	H	G	H	G	Y
AX-183886025	I	16.97	Chr2	24385731	1.22e-27	chr2LG1	17938781			H	H	Y	G	G	G	G	H	G	H	G	Y	Y	G	H	Y	H	G	H	G	H	H	G	H	G	H	-	H	G	Y	H	H	H	Y	H	H	G	H	G	Y
AX-183589831	I	16.97	Chr2	24410139	5.65e-26	chr2LG1	17969359			H	H	Y	G	G	G	G	G	G	H	G	Y	-	G	H	Y	H	G	H	G	H	H	G	H	G	H	-	H	G	-	H	H	H	Y	H	H	G	H	G	Y
AX-183589835	I	16.97	Chr2	24414023	2.61e-29	chr2LG1	17973230			H	H	Y	G	G	G	G	H	G	H	G	Y	Y	G	H	Y	H	G	H	G	H	H	G	H	G	H	H	H	G	Y	H	H	H	Y	H	H	G	H	G	Y
AX-183564195	I	17.21	Chr2	24434681	1.22e-27	chr2LG1	18032004			H	H	Y	G	G	G	G	H	G	H	G	Y	Y	G	H	Y	H	G	H	G	H	H	G	H	G	H	-	H	G	Y	H	H	H	Y	H	H	G	H	G	Y
AX-183873553	I	17.71	Chr2	24504177	2.61e-29	chr2LG1	17726014			H	H	Y	G	G	G	G	H	G	H	G	Y	Y	G	H	Y	H	G	H	G	H	H	G	H	G	H	G	H	G	Y	H	H	H	Y	H	H	G	H	G	Y
AX-183564198	I	17.71	Chr2	24524473	1.22e-27	chr2LG1	17744442			H	H	Y	G	G	G	G	H	G	H	G	Y	Y	G	H	Y	H	-	H	G	H	H	G	H	G	H	-	H	G	Y	H	H	H	Y	H	H	G	H	G	Y
AX-183871390	I	17.71	Chr2	24526922	2.61e-29	chr2LG1	17746891			H	H	Y	G	G	G	G	H	G	H	G	Y	Y	G	H	Y	H	-	H	G	H	H	G	H	G	H	-	H	G	Y	H	H	H	Y	H	H	G	H	G	Y
AX-183563132	I	17.71	Chr2	24527567	2.61e-29	chr2LG1	17747536			H	H	Y	G	G	G	G	H	G	H	G	Y	Y	G	H	Y	H	-	H	G	H	H	G	H	G	H	G	H	G	Y	H	H	H	Y	H	H	G	H	G	Y
AX-183877478	I	17.84	Chr2	24851549	1.22e-27	chr2LG1	19387473			H	H	Y	G	G	G	G	H	G	H	G	Y	Y	G	H	Y	H	G	H	G	H	H	G	H	G	H	G	H	G	Y	H	H	-	Y	H	H	G	H	G	Y
AX-183573666	I	18.08	Chr2	24853957	1.22e-27	chr2LG1	19389881			H	H	Y	G	G	G	G	H	G	H	G	Y	-	G	H	Y	H	G	-	G	H	H	G	H	G	H	-	H	G	Y	H	H	H	-	H	H	G	H	G	Y
AX-183575940	I	18.08	Chr2	25015005	2.61e-29	chr2LG1	19525706			H	H	Y	G	G	G	G	H	G	H	G	Y	-	G	H	Y	H	G	H	G	H	H	G	H	G	H	G	H	G	-	H	H	H	Y	H	H	G	H	G	Y
AX-183564201	I	18.21	Chr2	25260538	2.61e-29	chr2LG1	19045420			H	H	Y	G	G	G	G	H	G	H	G	Y	Y	G	H	Y	H	G	H	G	H	H	G	H	G	H	-	H	G	Y	H	H	H	Y	H	H	H	H	G	Y
AX-183575942	I	18.33	Chr2	25321874	2.61e-29	chr2LG1	19111059			H	H	Y	G	G	G	G	H	G	H	G	Y	Y	G	H	Y	H	G	H	G	H	H	G	H	G	H	G	H	G	Y	H	H	H	Y	H	H	H	H	G	Y
AX-183563133	I	18.33	Chr2	25325407	1.22e-27	chr2LG1	19114436			H	H	Y	G	G	G	G	H	G	H	G	Y	Y	G	H	Y	H	G	H	G	H	H	G	H	G	H	-	H	G	-	H	H	H	Y	H	H	H	H	G	Y
AX-183564203	I	18.46	Chr2	25519105	1.22e-27	chr2LG1	19204303			H	H	Y	G	G	G	G	-	G	H	G	Y	Y	G	H	Y	H	G	H	G	H	H	G	H	G	H	-	H	G	Y	-	H	H	Y	H	H	H	H	G	Y
AX-183637037	I	18.46	Chr2	25521840	2.61e-29	scaffold04799	3323			H	H	Y	G	G	G	G	H	G	H	G	Y	H	G	H	Y	H	G	H	G	H	H	G	H	G	H	G	H	G	Y	H	H	H	Y	H	H	H	H	G	Y
AX-183564204	I	18.46	Chr2	25729214	2.61e-29	chr2LG1	19206762			H	H	Y	G	G	G	G	H	G	H	G	Y	Y	G	H	Y	H	H	H	G	H	H	G	H	G	H	H	H	G	Y	H	H	H	Y	H	H	H	H	G	Y
AX-183861962	I	18.46	Chr2	25734998	2.61e-29	chr2LG1	19212513			H	H	Y	G	G	G	G	H	G	H	G	Y	-	G	H	Y	H	-	H	G	H	H	G	H	G	H	G	H	G	Y	H	H	H	Y	H	H	H	H	G	Y
AX-183861808	I	18.46	Chr2	25736607	1.22e-27	chr2LG1	19214122			H	H	Y	G	G	G	G	H	G	H	G	Y	Y	G	H	Y	H	G	H	G	H	H	G	H	G	H	-	H	G	Y	H	H	H	Y	H	H	H	H	G	Y
AX-183589853	I	18.46	Chr2	25805748	5.65e-26	chr2LG1	19771769			H	H	Y	G	G	G	G	H	G	H	G	Y	Y	G	H	Y	H	G	H	G	H	H	G	H	G	H	G	H	G	Y	H	H	H	Y	H	H	H	H	G	Y
AX-183887063	I	18.46	Chr2	25810463	1.57e-26	chr2LG1	19781157			H	H	Y	G	G	G	G	H	G	H	G	Y	H	G	H	Y	H	G	H	G	H	H	G	H	G	H	H	H	G	Y	H	H	H	Y	H	H	H	H	G	Y
AX-183889439	I	18.46	Chr2	25824330	1.22e-27	chr2LG1	19790702			H	H	Y	G	G	G	G	H	G	H	G	Y	Y	G	H	Y	H	G	H	G	H	H	G	H	G	H	-	H	G	Y	H	H	H	Y	H	H	H	H	G	Y
AX-183887615	I	18.46	Chr2	25824625	2.63e-24	chr2LG1	19790996			H	H	Y	G	G	G	G	H	G	H	G	Y	Y	G	H	Y	H	H	H	G	H	H	G	H	G	H	-	H	G	Y	H	H	H	Y	H	H	H	H	G	Y
AX-183564206	I	18.58	Chr2	25878880	2.61e-29	chr2LG1	19826505			H	H	Y	G	G	G	G	H	G	H	G	Y	-	G	H	Y	H	-	H	G	H	H	G	H	G	H	G	H	G	-	H	H	H	Y	H	H	H	H	G	Y
AX-183867742	I	18.58	Chr2	25902842	2.61e-29	chr2LG1	19872387			H	H	Y	G	G	G	G	H	G	H	G	Y	-	G	H	Y	H	G	H	G	H	H	G	H	G	H	G	H	G	-	H	H	H	Y	H	H	H	H	G	Y
AX-183563135	I	18.58	Chr2	25904396	1.22e-27	chr2LG1	19873941			H	H	Y	G	G	G	G	H	G	H	G	Y	Y	G	H	Y	H	G	H	G	H	H	G	H	G	H	G	H	G	Y	H	H	H	Y	H	H	H	H	G	Y
AX-183861290	I	18.58	Chr2	25904528	2.61e-29	chr2LG1	19874073			H	H	Y	G	G	G	G	H	G	H	G	Y	-	G	H	Y	H	G	H	G	-	H	G	H	G	H	-	H	G	Y	H	H	-	Y	H	H	H	H	G	Y
AX-183589857	I	18.58	Chr2	26011060	2.61e-29	chr2LG1	19938618			H	H	Y	G	G	G	G	H	G	H	G	Y	Y	G	H	Y	H	G	H	G	H	H	G	H	G	H	H	H	G	Y	H	H	H	Y	H	H	H	H	G	Y
AX-183589866	I	21.25	Chr2	29259878	2.61e-29	chr2LG1	21372289			H	H	Y	G	G	G	G	H	G	H	G	Y	H	H	H	H	H	G	H	G	H	H	G	H	G	H	G	H	G	Y	H	H	H	H	H	H	Y	H	G	Y
AX-183564211	I	21.25	Chr2	29265891	2.61e-29	chr2LG1	21378302			H	H	Y	G	G	G	G	H	G	H	G	Y	Y	H	-	H	H	G	H	G	H	H	-	H	-	H	G	H	G	Y	H	H	H	H	H	H	Y	H	G	Y
AX-183564212	I	21.37	Chr2	29368171	2.61e-29	chr2LG1	21468499			H	H	Y	G	G	G	G	H	G	H	G	Y	-	H	H	H	H	G	H	G	H	H	G	H	G	H	-	H	G	Y	H	H	H	H	H	H	Y	H	G	Y
AX-183860678	I	21.37	Chr2	29409269	2.61e-29	chr2LG1	21554381			H	H	Y	G	G	G	G	H	G	H	G	Y	Y	H	H	H	H	G	H	G	H	H	G	H	G	H	G	H	G	Y	H	H	H	H	H	H	Y	H	G	Y
AX-183890752	I	21.5	Chr2	29944491	1.22e-27	super-scaffold4104	135130			H	H	Y	G	G	G	G	G	G	H	G	Y	Y	H	H	H	H	G	H	G	H	H	-	H	G	H	-	H	G	Y	H	H	H	H	H	H	Y	H	G	Y
AX-183637499	I	21.5	Chr2	30012286	2.61e-29	super-scaffold4104	210682			H	H	Y	G	G	G	G	H	G	H	G	Y	Y	H	H	H	H	G	H	G	H	H	G	H	G	H	H	H	G	Y	H	H	H	H	H	H	Y	H	G	Y
AX-183580903	I	21.62	Chr2	30363941	1.22e-27	scaffold01289	57846			G	H	Y	G	G	G	G	H	G	H	G	Y	Y	H	H	H	H	G	H	G	H	H	G	H	G	H	H	H	G	Y	H	H	H	H	H	H	Y	H	G	Y
AX-183575949	I	22.49	Chr2	32063573	1.22e-27	chr2LG1	22251410			G	H	Y	G	G	G	G	H	G	H	G	Y	Y	H	H	H	H	G	H	G	H	H	G	H	G	H	-	H	G	Y	H	H	-	H	H	H	Y	H	G	Y
AX-183589884	I	22.62	Chr2	32211929	1.22e-27	chr2LG1	22398843			G	H	Y	G	G	G	G	H	G	H	G	Y	-	H	H	H	H	G	H	G	H	H	G	H	G	H	G	H	G	H	H	H	-	H	H	H	Y	H	G	Y
AX-183570340	I	22.74	Chr2	32253718	1.22e-27	scaffold00680	73454			G	H	Y	G	G	G	G	H	G	H	G	Y	Y	H	H	-	H	G	H	G	H	H	G	H	G	H	-	H	G	Y	H	H	H	H	H	H	Y	H	G	Y
AX-183861809	I	23.11	Chr2	32805637	1.22e-27	scaffold01231	4090			G	H	Y	G	G	G	G	H	G	H	G	Y	Y	H	H	H	H	G	H	G	H	H	G	H	G	H	G	H	G	Y	H	H	H	H	H	H	Y	H	G	Y
AX-183572526	I	23.49	Chr2	35192243	1.22e-27	scaffold02112	64220			G	H	Y	G	G	G	G	H	G	H	G	Y	Y	H	H	H	H	-	H	G	H	H	G	H	G	H	-	H	G	Y	H	H	H	H	H	H	Y	H	G	Y
AX-183589890	I	23.61	Chr2	35991005	2.61e-29	chr2LG1	23068995			G	H	Y	G	G	G	G	H	-	H	G	Y	-	H	H	H	H	G	H	G	H	H	G	H	G	H	G	H	-	-	H	H	H	H	H	H	Y	H	G	Y
AX-183876519	I	23.61	Chr2	35992800	1.22e-27	chr2LG1	23070790			G	H	Y	G	G	G	G	H	G	H	G	Y	Y	H	H	H	H	G	H	G	H	H	G	H	G	H	H	H	G	Y	H	H	H	H	H	H	Y	H	G	Y
AX-183564216	I	23.61	Chr2	36041987	2.61e-29	chr2LG1	23124088			G	H	Y	G	G	G	G	H	G	H	G	Y	-	H	H	H	H	G	H	G	H	H	G	H	G	H	G	H	G	Y	H	H	H	H	H	H	Y	H	G	Y
AX-183875577	I	23.73	Chr2	36543533	1.22e-27	chr2LG1	23739794			G	H	Y	G	G	G	G	H	G	H	G	Y	Y	H	H	H	H	G	H	G	H	H	G	H	G	H	G	H	G	Y	H	H	H	H	H	H	Y	H	G	Y
AX-183575953	I	23.86	Chr2	36553615	2.61e-29	chr2LG1	23749982			G	H	Y	G	G	G	G	H	G	H	G	Y	Y	H	H	H	H	G	H	G	H	H	G	H	G	H	H	H	G	Y	H	H	H	H	H	H	Y	H	G	Y
AX-183589900	I	23.98	Chr2	36563093	1.22e-27	chr2LG1	23759608			G	H	Y	G	G	G	G	H	G	H	G	Y	H	H	H	H	H	G	H	G	H	H	G	H	G	H	G	H	G	Y	H	H	H	H	H	H	Y	H	G	Y
AX-183589903	I	23.98	Chr2	36563422	1.22e-27	chr2LG1	23759937			G	H	Y	G	G	G	G	H	G	H	G	Y	Y	H	H	H	H	G	H	G	H	H	G	H	G	H	G	H	G	Y	H	H	H	H	H	H	Y	H	G	Y
AX-183860644	I	23.98	Chr2	36803406	1.22e-27	chr2LG1	23982428			G	H	Y	G	G	G	G	H	G	H	G	Y	Y	H	H	H	H	G	H	G	H	H	G	H	G	H	H	H	G	Y	H	H	H	H	H	H	Y	H	G	Y
AX-183564223	I	24.11	Chr2	36949233	1.22e-27	chr2LG1	24131275			G	H	Y	G	G	G	G	H	G	H	G	Y	Y	H	H	H	H	G	H	G	H	H	G	H	G	H	G	H	G	Y	H	H	H	H	H	H	Y	H	G	Y
AX-183866408	I	24.11	Chr2	37725406	1.22e-27	chr2LG1	24636763			G	H	Y	G	G	G	G	H	G	H	G	Y	Y	H	H	H	H	G	H	G	H	H	G	H	G	H	G	H	G	Y	H	H	H	H	H	H	Y	H	G	Y
AX-183872819	I	24.11	Chr2	38235136	4.37e-27	scaffold03155	156422			G	H	Y	G	G	G	G	H	G	H	G	Y	Y	H	H	H	H	G	-	G	H	H	G	H	G	H	-	H	G	Y	H	H	-	H	H	H	Y	H	G	Y
AX-183564229	I	24.11	Chr2	38601860	2.61e-29	chr2LG1	24869447			G	H	Y	G	G	G	G	H	G	H	G	Y	Y	H	H	H	H	-	H	G	H	H	G	H	G	H	-	H	G	Y	H	H	H	H	H	H	Y	H	G	Y
AX-183866349	I	24.11	Chr2	38604820	2.61e-29	chr2LG1	24872387			G	H	Y	G	G	G	G	H	G	H	G	Y	H	H	H	H	H	G	H	G	H	H	G	H	G	H	G	H	G	Y	H	H	H	H	H	H	Y	H	G	Y
AX-183563141	I	24.11	Chr2	38609684	5.65e-26	chr2LG1	24877148			G	H	Y	G	G	G	G	H	G	H	G	Y	Y	H	H	H	H	-	H	G	H	H	G	H	G	H	-	H	G	Y	H	H	H	H	H	H	Y	H	G	Y
AX-183564230	I	24.11	Chr2	38610326	1.22e-27	chr2LG1	24877811			G	H	Y	G	G	G	G	H	G	H	G	Y	Y	H	H	H	H	G	H	G	H	H	G	H	G	H	H	H	G	Y	H	H	H	H	H	H	Y	H	G	Y
AX-183862007	I	24.11	Chr2	38700141	5.65e-26	chr2LG1	24936451			G	H	Y	G	G	G	G	H	G	H	G	Y	-	H	H	H	H	-	H	G	H	H	G	H	G	H	-	H	G	Y	H	H	H	H	H	H	Y	H	G	Y
AX-183573161	I	24.11	Chr2	38909497	1.22e-27	chr2LG1	25013292			G	H	Y	G	G	G	G	H	G	H	G	Y	H	H	H	H	H	-	H	G	H	H	G	H	G	H	-	H	G	-	H	H	H	H	H	H	Y	H	G	Y
AX-183865973	I	24.11	Chr2	39477895	3.4e-23	chr2LG1	25169208			G	H	Y	G	G	G	G	H	G	H	G	Y	Y	H	H	H	H	H	H	G	H	H	G	H	G	H	H	H	G	Y	H	H	H	H	H	H	Y	H	G	Y
AX-183575959	I	24.35	Chr2	39660110	2.61e-29	chr2LG1	25344548			G	H	Y	G	G	G	G	H	G	H	G	Y	Y	H	H	H	H	G	H	G	H	H	G	H	G	H	-	H	G	Y	H	H	H	H	H	H	Y	H	G	Y
AX-183861575	I	24.35	Chr2	39660892	1.22e-27	chr2LG1	25345329			G	H	Y	G	G	G	G	H	G	H	G	Y	Y	H	H	H	H	G	H	G	H	H	G	H	G	H	G	H	G	Y	H	H	H	H	H	H	Y	H	G	Y
AX-183589927	I	24.48	Chr2	39765541	2.61e-29	chr2LG1	25499873			G	H	Y	G	G	G	G	H	G	H	G	Y	Y	H	H	H	H	-	H	G	H	H	G	H	G	H	G	H	G	Y	H	H	H	H	H	H	Y	H	G	Y
AX-183589928	I	24.48	Chr2	39780349	4.37e-27	chr2LG1	25524367			G	H	Y	G	G	G	G	H	G	H	G	Y	H	G	H	H	H	G	H	G	H	H	G	H	G	H	G	H	G	Y	-	H	-	H	H	-	Y	H	G	Y
AX-183564234	I	24.48	Chr2	39785834	2.61e-29	chr2LG1	25529885			G	H	Y	G	G	G	G	H	G	H	G	Y	-	H	H	H	H	G	H	G	H	H	G	H	G	H	G	H	G	-	H	H	H	H	H	H	Y	H	G	Y
AX-183866245	I	24.48	Chr2	39786496	5.65e-26	chr2LG1	25530546			G	H	Y	G	G	G	G	-	G	H	G	Y	Y	H	H	H	H	G	H	G	H	H	G	H	G	H	H	H	G	Y	H	H	-	H	H	H	Y	H	G	Y
AX-183875144	I	24.85	Chr2	40968825	1.22e-27	chr2LG1	26079597			G	H	Y	G	G	G	G	H	G	H	G	Y	Y	H	H	H	H	G	H	G	H	H	G	H	G	H	G	H	G	Y	H	H	H	H	H	H	Y	H	G	Y
AX-183867667	I	24.98	Chr2	41217010	3.38e-28	scaffold01041	224178			G	H	Y	G	G	G	G	H	G	H	G	Y	Y	H	H	H	H	G	H	G	H	H	G	H	G	H	G	H	G	Y	H	H	H	H	H	H	Y	H	G	Y
AX-183574727	I	24.98	Chr2	42436090	1.22e-27	scaffold01360	478324			G	H	Y	G	G	G	G	H	G	H	G	Y	H	H	H	H	H	G	H	G	H	H	G	H	G	H	G	H	G	Y	H	H	H	H	H	H	Y	H	G	Y
AX-183633623	I	25.1	Chr2	408653401	1.23e-17	scaffold01360	486033			G	H	H	G	G	G	G	H	G	H	G	Y	-	-	H	H	H	G	H	G	H	H	G	H	G	H	G	H	G	Y	H	H	H	H	H	H	Y	H	G	Y
AX-183861635	I	25.1	Chr2	42482245	4.37e-27	chr2LG1	23590431			G	H	H	G	G	G	G	H	G	H	G	Y	Y	H	H	H	H	G	H	G	H	H	G	H	G	H	H	H	G	Y	H	H	H	H	H	H	Y	H	G	Y
AX-183564237	I	25.1	Chr2	42590860	2.61e-29	chr2LG1	23456454			G	H	H	G	G	G	G	H	G	H	G	Y	Y	H	H	H	H	G	H	G	H	H	G	H	G	H	G	H	G	Y	H	H	H	H	H	H	Y	H	G	Y
AX-183573164	I	25.1	Chr2	42591531	2.61e-29	chr2LG1	23455783			G	H	H	G	G	G	G	H	G	H	G	Y	Y	H	H	H	H	G	H	G	H	H	G	H	G	H	G	H	G	-	H	H	H	H	H	H	Y	H	G	Y
AX-183563144	I	25.1	Chr2	42591627	2.61e-29	chr2LG1	23455687			G	H	H	G	G	G	G	H	G	H	G	Y	-	H	H	H	H	G	H	G	H	H	G	H	G	H	G	H	G	-	H	H	H	H	H	H	Y	H	G	Y
AX-183889440	I	25.1	Chr2	42876193	1.22e-27	chr2LG1	30113391			G	H	H	G	G	G	G	H	G	H	G	Y	Y	H	H	H	H	G	H	G	H	H	G	H	G	H	G	H	G	Y	H	H	H	H	H	H	Y	H	G	Y
AX-183573166	I	25.1	Chr2	43011872	1.22e-27	chr2LG1	28973649			G	H	H	G	G	G	G	H	G	H	G	-	Y	H	H	H	H	G	H	G	H	H	G	H	G	H	H	H	G	Y	H	H	H	H	H	H	Y	H	G	Y
AX-181194490	I	25.1	Chr2	43029546	2.61e-29	chr2LG1	28991409			G	H	-	H	G	G	G	H	G	-	G	Y	Y	H	H	H	H	-	-	G	H	H	G	H	G	H	G	H	G	Y	H	H	H	H	H	H	Y	H	G	Y
AX-183863200	I	25.22	Chr2	43098718	5.65e-26	chr2LG1	29064059			G	H	H	G	G	G	G	H	G	H	G	Y	-	H	H	H	H	G	H	G	H	H	G	H	G	H	H	H	G	Y	H	H	H	H	H	H	Y	H	G	Y
AX-183860923	I	25.35	Chr2	44252807	1.22e-27	super-scaffold3348	205463			G	H	H	G	G	G	G	H	G	H	G	Y	-	H	H	H	H	G	H	G	H	H	G	H	G	H	G	H	G	-	H	H	H	H	H	H	Y	H	G	Y
AX-183870923	I	25.35	Chr2	44252964	5.65e-26	super-scaffold3348	205306			G	H	H	G	G	G	G	H	G	H	G	Y	Y	H	H	H	H	G	H	G	H	H	G	H	G	H	-	-	G	Y	H	H	H	H	H	H	Y	H	G	Y
AX-183589935	I	25.35	Chr2	44276501	2.61e-29	super-scaffold3348	190439			G	H	H	G	G	G	G	H	G	H	G	Y	Y	H	H	H	H	-	H	G	H	H	G	H	G	H	G	H	G	Y	H	H	H	H	H	H	Y	H	G	Y
AX-183890361	I	25.35	Chr2	44276540	2.61e-29	super-scaffold3348	190400			G	H	H	G	G	G	G	H	G	H	G	Y	H	H	H	H	H	G	H	G	H	H	G	H	G	H	G	H	G	Y	H	H	Y	H	H	H	Y	H	G	Y
AX-183589951	I	25.47	Chr2	46298768	1.22e-27	chr2LG1	29145945			G	H	H	G	G	G	G	H	G	H	G	Y	Y	H	H	H	H	G	H	G	H	H	G	H	G	H	G	H	G	Y	H	H	H	H	H	H	Y	H	G	Y
AX-183589950	I	25.47	Chr2	46300026	1.22e-27	chr2LG1	29144688			G	H	H	G	G	G	G	H	G	H	G	Y	Y	H	H	H	H	G	H	G	H	H	G	H	G	H	G	H	G	Y	H	H	H	H	H	H	Y	H	G	Y
AX-183868189	I	25.47	Chr2	46300820	2.61e-29	chr2LG1	29143894			G	H	H	G	G	G	G	H	G	H	G	Y	-	H	H	H	H	G	H	G	H	H	G	H	G	H	G	H	G	Y	H	H	H	H	H	H	Y	H	G	Y
AX-183890803	I	25.59	Chr2	46568646	1.22e-27	chr2LG1	29791319			G	-	H	G	G	G	G	H	G	H	G	Y	H	H	H	H	H	G	H	G	H	H	G	H	G	H	-	H	G	Y	H	H	H	H	H	H	Y	-	G	Y
AX-183575969	I	25.59	Chr2	46782782	2.61e-29	chr2LG1	30293996			G	H	H	G	G	G	G	H	G	H	G	Y	Y	H	H	H	H	-	H	G	H	H	G	H	G	H	G	H	G	Y	H	H	H	H	H	H	Y	H	G	Y
AX-183575968	I	25.59	Chr2	46792902	2.61e-29	chr2LG1	30283876			G	H	H	G	G	G	G	H	G	H	G	Y	Y	H	H	H	H	G	H	G	H	H	G	H	G	H	G	H	G	Y	H	H	H	H	H	H	Y	H	G	Y
AX-183866067	I	25.84	Chr2	46793072	1.22e-27	chr2LG1	30283706			G	H	H	G	G	G	G	H	G	H	G	Y	Y	H	H	H	H	G	H	G	H	H	G	H	G	H	G	H	G	-	H	H	H	H	H	H	Y	H	G	Y
AX-183589958	I	25.97	Chr2	46793132	1.22e-27	chr2LG1	30283646			G	H	H	G	G	G	G	H	G	H	G	Y	Y	H	H	H	H	G	H	G	H	H	G	H	G	H	-	H	G	Y	H	H	H	H	H	H	Y	H	G	Y
AX-183861275	I	26.22	Chr2	46984221	1.22e-27	chr2LG1	30156839			G	H	H	G	G	G	G	H	G	H	G	Y	Y	H	H	H	H	G	H	G	H	H	G	H	G	H	-	H	G	Y	H	H	H	H	H	H	Y	H	G	Y
AX-183866160	I	26.22	Chr2	47068043	1.22e-27	chr2LG1	31639728			G	H	H	G	G	G	G	H	G	H	G	Y	Y	H	H	H	H	G	H	G	H	H	G	H	G	H	G	H	G	Y	H	H	H	H	H	H	Y	H	G	Y
AX-183863624	I	26.22	Chr2	47159700	2.61e-29	chr2LG1	31547763			G	H	H	G	G	G	G	H	G	H	G	Y	Y	H	H	H	H	G	H	G	H	H	G	H	G	H	G	H	G	Y	H	H	H	H	H	H	Y	H	G	Y
AX-183575971	I	26.22	Chr2	47160083	1.22e-27	chr2LG1	31547380			G	H	H	G	G	G	G	H	G	H	G	Y	Y	H	H	H	H	G	H	G	H	H	G	H	G	H	G	H	G	Y	H	H	H	H	H	H	Y	H	G	Y
AX-183574768	I	26.34	Chr2	47394370	2.61e-29	scaffold02372	27628			G	H	H	G	G	G	G	H	G	H	G	Y	Y	H	H	H	H	G	H	G	H	H	G	H	G	H	G	H	G	Y	H	H	H	H	H	H	Y	H	G	Y
AX-183589968	I	26.46	Chr2	49751473	1.22e-27	chr2LG1	32839511			G	H	H	G	G	G	G	H	G	H	G	Y	Y	H	H	H	H	-	H	G	H	H	G	H	G	H	-	H	G	Y	H	H	H	H	H	H	Y	H	G	Y
AX-183564240	I	26.46	Chr2	50077519	1.22e-27	chr2LG1	31960181			G	H	H	G	G	G	G	H	G	H	G	Y	Y	H	H	H	H	G	H	G	H	H	G	H	G	H	G	H	G	Y	H	H	H	H	H	H	Y	H	G	Y
AX-183890362	I	26.46	Chr2	50087813	2.61e-29	chr2LG1	31971369			G	H	H	G	G	G	G	H	G	H	G	Y	-	H	H	H	H	G	H	G	H	H	G	H	G	H	G	H	G	Y	H	H	H	H	H	H	Y	H	G	Y
AX-183589961	I	26.46	Chr2	50090238	2.61e-29	chr2LG1	31973794			G	H	H	G	G	G	G	H	G	H	G	Y	Y	H	H	H	H	G	H	G	H	H	G	H	G	H	-	H	G	Y	H	H	H	H	H	H	Y	H	G	Y
AX-183589962	I	26.46	Chr2	50091128	1.22e-27	chr2LG1	31974682			G	H	H	G	G	G	G	H	G	H	G	Y	Y	H	H	H	H	G	H	G	H	H	G	H	G	H	-	H	G	Y	H	H	H	H	H	H	Y	H	G	Y
AX-183864696	I	26.46	Chr2	50092295	2.61e-29	chr2LG1	31975848			G	H	H	G	G	G	G	H	G	H	G	Y	Y	H	H	H	H	G	H	G	H	H	G	H	G	H	G	H	G	-	H	H	H	H	H	H	Y	H	G	Y
AX-183573668	I	26.59	Chr2	50158984	1.22e-27	chr2LG1	32040292			G	H	H	G	G	G	G	H	G	H	G	Y	Y	H	H	H	H	G	H	G	H	H	G	H	G	H	H	H	G	Y	H	H	H	H	H	H	Y	H	G	Y
AX-183881120	I	26.71	Chr2	50181340	1.22e-27	chr2LG1	32062817			G	H	H	G	G	G	G	H	G	H	G	Y	-	H	H	H	H	-	H	G	H	H	G	-	G	H	G	H	G	Y	H	H	H	H	H	H	Y	H	G	Y
AX-183884428	I	26.71	Chr2	50183302	1.22e-27	chr2LG1	32064778			G	H	H	G	G	G	G	H	G	H	G	Y	Y	H	H	H	H	G	H	G	H	H	G	H	G	H	G	H	G	Y	H	H	H	H	H	H	Y	H	G	Y
AX-183572606	I	26.71	Chr2	50413616	4.43e-17	chr2LG1	34371062			G	H	H	G	G	G	G	H	G	H	G	Y	Y	H	H	H	H	G	H	G	H	H	H	H	G	H	G	H	G	H	H	H	H	H	H	H	Y	H	G	Y
AX-183865246	I	27.71	Chr2	52846018	2.61e-29	chr2LG1	34860703			G	H	H	G	G	G	G	H	G	H	G	Y	Y	H	H	H	H	G	H	G	H	H	G	G	G	H	G	H	G	Y	H	H	H	H	H	H	Y	H	G	-
AX-183564238	I	28.58	Chr2	57900943	1.22e-27	chr2LG1	33524069			G	H	H	G	G	G	G	H	G	H	G	Y	Y	H	H	H	H	G	H	G	H	H	G	G	G	H	G	H	G	Y	H	H	H	H	H	H	Y	H	G	Y
AX-183867583	I	28.58	Chr2	58980694	5.65e-26	chr2LG1	37955890			G	H	H	G	G	G	G	H	G	H	G	Y	Y	H	H	H	H	G	-	G	H	H	G	-	G	H	G	H	G	H	H	H	H	H	H	H	Y	H	G	Y
AX-183589975	I	28.58	Chr2	58981132	1.22e-27	chr2LG1	37956318			G	H	H	G	G	G	G	H	G	H	G	Y	-	H	H	H	H	-	H	G	H	H	G	G	G	H	G	H	G	Y	H	H	H	H	H	H	Y	H	G	Y
AX-183575988	I	31.78	Chr2	69187117	1.22e-27	chr2LG1	44375254			G	H	H	G	G	G	G	H	G	H	G	Y	Y	H	H	H	H	G	H	G	H	H	G	G	G	H	G	H	G	-	H	G	H	H	H	H	Y	G	G	H
AX-183865638	I	31.78	Chr2	71458959	1.22e-27	chr2LG1	46969525			G	H	H	G	G	G	G	H	G	H	G	Y	Y	H	H	H	H	G	H	G	H	H	G	G	G	H	G	H	G	Y	H	G	H	H	H	H	Y	G	G	H
AX-183863287	I	31.78	Chr2	71459847	2.61e-29	chr2LG1	46970412			G	H	H	G	G	G	G	H	G	H	G	Y	Y	H	H	H	H	G	H	G	H	H	G	G	G	H	G	H	G	-	H	G	H	H	H	H	Y	G	G	H
AX-183564273	I	31.78	Chr2	71460712	2.61e-29	chr2LG1	46971277			G	H	H	G	G	G	G	H	G	H	G	Y	-	H	H	H	H	G	H	G	H	H	G	G	G	H	H	H	G	Y	H	G	H	H	H	H	Y	G	G	H
AX-183575994	I	31.78	Chr2	71624411	2.61e-29	chr2LG1	47292343			G	H	H	G	G	G	G	H	G	H	G	Y	H	H	H	H	H	G	H	G	H	H	G	G	G	H	G	H	G	-	H	G	H	H	H	H	Y	G	G	H
AX-183868348	I	31.78	Chr2	71626483	5.65e-26	chr2LG1	47294413			G	-	H	G	G	G	G	H	G	H	G	Y	-	H	H	H	H	-	H	G	H	H	G	-	G	H	-	H	G	-	H	G	H	H	H	H	Y	G	G	H
AX-183575995	I	31.9	Chr2	71695225	1.22e-27	chr2LG1	47351377			G	H	H	G	G	G	G	H	G	H	G	Y	Y	H	H	H	H	G	H	G	H	H	G	-	G	H	G	H	G	Y	H	G	H	H	H	H	Y	G	G	H
AX-183590054	I	31.9	Chr2	71704377	9.39e-29	chr2LG1	47377952			G	Y	H	G	G	G	G	H	G	H	G	Y	Y	H	H	H	H	G	H	G	H	H	G	H	G	H	-	H	G	H	H	G	H	H	H	H	Y	G	G	H
AX-183638318	I	32.03	Chr2	71712098	1.22e-27	chr2LG1	47385707			G	H	H	G	G	G	G	H	G	H	G	Y	Y	H	H	H	H	G	H	G	H	H	G	G	G	H	G	H	G	Y	H	G	H	H	H	H	Y	G	G	H
AX-183573430	I	32.03	Chr2	71713501	1.22e-27	chr2LG1	47387104			G	H	H	G	G	G	G	H	G	H	G	Y	H	H	H	H	H	G	H	G	H	H	G	G	G	H	G	H	G	Y	H	G	H	H	H	H	Y	G	G	H
AX-183861163	I	32.03	Chr2	71718519	5.65e-26	chr2LG1	47392245			G	H	H	G	G	G	G	H	G	H	G	Y	-	H	H	H	H	G	H	G	H	H	G	G	G	H	G	H	G	Y	H	G	H	H	H	H	Y	G	G	H
AX-183564275	I	32.15	Chr2	71876523	2.61e-29	chr2LG1	47523459			G	H	H	G	G	G	G	H	G	H	G	Y	Y	H	H	H	H	-	H	G	H	H	G	G	G	H	H	H	G	Y	H	G	H	H	H	H	Y	G	G	H
AX-183564276	I	32.27	Chr2	71881907	1.22e-27	chr2LG1	47528867			G	H	H	G	G	G	G	H	H	H	G	Y	H	H	H	H	H	G	H	G	H	H	G	G	G	H	-	H	G	Y	H	G	-	H	H	H	Y	G	G	H
AX-183574857	I	32.27	Chr2	72315907	1.22e-27	chr2LG1	47679997			G	H	H	G	G	G	G	H	G	H	G	Y	Y	H	H	H	H	G	H	G	H	H	G	G	G	H	-	H	G	Y	H	G	H	H	H	H	Y	G	G	H
AX-183574909	I	32.27	Chr2	72316658	1.22e-27	chr2LG1	47679249			G	H	H	G	G	G	G	H	G	H	G	Y	Y	H	H	H	H	G	H	G	H	H	G	H	G	H	G	H	G	Y	H	G	H	H	H	H	Y	G	G	H
AX-183865542	I	32.4	Chr2	73092512	2.61e-29	chr2LG1	48647636			G	H	H	G	G	G	G	H	G	H	G	Y	Y	H	H	H	H	-	H	G	H	H	G	G	G	H	-	H	G	Y	H	G	H	H	H	H	Y	G	G	H
AX-183570319	I	32.4	Chr2	73233504	4.37e-27	scaffold00288	89566			G	H	H	G	G	G	G	H	G	H	G	Y	Y	H	H	H	H	-	H	G	H	H	G	G	G	H	-	H	G	Y	H	G	H	H	H	H	Y	G	G	H
AX-183564278	I	32.4	Chr2	73260506	2.61e-29	chr2LG1	48003028			G	H	H	G	G	G	G	H	G	H	G	Y	-	H	H	H	H	-	H	G	H	H	G	G	G	H	-	H	G	-	H	G	H	H	H	H	Y	G	G	H
AX-183864377	I	32.4	Chr2	73260731	4.37e-27	chr2LG1	48003249			G	-	-	G	G	G	G	H	G	-	G	Y	Y	H	H	-	H	-	H	G	H	H	G	H	G	H	H	H	G	H	H	G	H	H	H	H	-	G	G	H
AX-183590063	I	32.4	Chr2	73878214	2.61e-29	chr2LG1	48579548			G	H	H	G	G	G	G	H	G	H	G	Y	Y	H	H	H	H	G	H	G	H	H	G	G	G	H	G	H	G	Y	H	G	H	H	H	H	Y	G	G	H
AX-183564279	I	32.4	Chr2	73878388	1.22e-27	chr2LG1	48579722			G	H	H	G	G	G	G	H	G	H	G	-	-	H	H	H	H	G	H	G	H	H	G	G	G	H	-	H	G	-	H	G	H	H	H	H	Y	G	G	H
AX-183590064	I	32.4	Chr2	73878732	1.22e-27	chr2LG1	48580055			G	H	H	G	G	G	G	H	G	H	G	Y	Y	H	H	H	H	G	H	G	H	H	G	G	G	H	G	H	G	Y	H	G	H	H	H	H	Y	G	G	H
AX-183573677	I	32.4	Chr2	73881816	2.61e-29	chr2LG1	48583682			G	H	H	G	G	G	G	H	G	H	G	Y	H	H	H	H	H	-	H	G	H	H	G	G	G	H	G	H	G	Y	H	G	H	H	H	H	Y	G	G	H
AX-183575999	I	33.02	Chr2	75251327	2.61e-29	chr2LG1	50680374			G	H	H	G	G	G	G	H	G	H	G	Y	-	H	H	H	H	G	H	G	H	H	G	G	G	H	-	H	G	Y	H	G	H	H	H	H	Y	G	G	H
AX-183590087	I	33.14	Chr2	75309058	5.65e-26	chr2LG1	50626905			G	H	H	G	G	G	G	H	G	H	G	Y	Y	H	H	H	H	G	H	G	H	H	G	G	G	H	G	H	G	Y	H	G	H	H	H	H	Y	G	G	H
AX-183876062	I	33.14	Chr2	75310872	1.22e-27	chr2LG1	50625104			G	H	H	G	G	G	G	H	G	H	G	Y	Y	H	H	H	H	G	H	G	H	H	G	H	G	H	G	H	G	-	H	G	H	H	H	H	Y	G	G	H
AX-183574860	I	33.27	Chr2	75750197	1.22e-27	chr2LG1	51305735			G	H	H	G	G	G	G	H	G	H	G	Y	H	H	H	H	H	G	H	G	H	H	G	G	G	H	G	H	G	Y	H	G	H	H	H	H	Y	G	G	H
AX-183575998	I	33.27	Chr2	75750328	1.22e-27	chr2LG1	51305604			G	H	H	G	G	G	G	H	G	H	G	Y	Y	H	H	H	H	G	H	G	H	H	G	G	G	H	G	H	G	H	H	G	H	H	H	H	Y	G	G	H
AX-183864243	I	33.52	Chr2	77329161	2.61e-29	chr2LG1	50462687			G	H	H	G	G	G	G	H	G	H	G	Y	Y	H	H	H	H	-	H	G	H	H	G	G	G	H	G	H	G	Y	H	G	H	H	H	H	Y	G	G	H
AX-183866267	I	34.14	Chr2	79252272	2.61e-29	chr2LG1	58295429			G	H	H	G	G	G	G	H	G	H	G	Y	Y	H	H	H	H	G	H	G	H	H	G	G	G	H	G	H	G	Y	H	G	H	H	H	H	Y	G	G	H
AX-183866409	I	34.39	Chr2	79402966	1.22e-27	chr2LG1	52385278			G	H	H	G	G	G	G	H	G	H	G	Y	Y	H	H	H	H	-	H	G	H	H	G	G	G	H	G	H	G	Y	H	G	H	H	H	H	Y	G	G	H
AX-183879016	I	34.64	Chr2	80554533	1.22e-27	chr2LG1	55833270			G	H	H	G	G	G	G	H	G	H	G	Y	Y	H	H	H	H	G	H	G	H	H	G	G	G	H	G	H	G	Y	H	G	H	H	H	H	Y	G	G	H
AX-183860820	I	34.64	Chr2	80603674	1.22e-27	chr2LG1	55680317			G	H	H	G	G	G	G	H	G	H	G	Y	H	H	H	H	H	G	H	G	H	H	G	G	G	H	-	H	G	Y	H	G	-	H	H	H	Y	G	G	H
AX-183866776	I	34.64	Chr2	80702907	1.22e-27	chr2LG1	55572742			G	H	H	G	G	G	G	H	G	H	G	Y	Y	H	H	H	H	G	H	G	H	H	G	G	G	H	H	H	G	Y	H	G	H	H	H	H	Y	G	G	H
AX-183573683	I	34.88	Chr2	85061729	1.22e-27	chr2LG1	56659117			G	H	H	G	G	G	G	H	G	H	G	Y	Y	H	H	H	H	H	H	G	H	H	G	G	G	H	G	H	G	-	H	G	H	H	H	H	Y	G	G	H
AX-183564287	I	35.38	Chr2	88168822	1.22e-27	chr2LG1	58961503			G	G	H	-	G	G	G	G	G	-	G	Y	H	-	-	H	H	G	H	G	G	-	G	G	G	G	G	-	G	-	G	G	G	G	-	-	Y	G	G	-
AX-183576006	I	35.51	Chr2	89253055	1.22e-27	chr2LG1	58503854			G	H	H	G	G	G	G	H	G	H	G	Y	Y	H	H	H	H	G	H	G	H	H	G	G	G	H	-	H	G	Y	H	G	H	H	H	H	Y	G	G	H
AX-183884346	I	35.75	Chr2	89521503	1.22e-27	scaffold03066	121586			G	H	H	G	G	G	G	H	G	H	G	Y	Y	H	H	H	H	G	H	G	H	H	G	G	G	H	G	H	G	Y	H	G	H	H	H	H	Y	G	G	H
AX-183572558	I	35.75	Chr2	89521858	7.31e-25	scaffold03066	121234			G	H	H	G	G	G	G	H	G	H	G	Y	Y	H	H	H	H	G	G	G	-	H	-	-	G	H	G	H	G	H	H	G	-	H	H	H	Y	G	G	H
AX-183868124	I	35.75	Chr2	89903603	2.61e-29	scaffold01696	150387			G	H	H	G	G	G	G	H	G	H	G	Y	Y	H	H	H	H	G	H	G	H	H	G	G	G	H	G	H	G	-	H	G	H	H	H	H	Y	G	G	H
AX-183564289	I	35.75	Chr2	91428292	2.61e-29	chr2LG1	64701522			G	H	H	G	G	G	G	H	G	H	G	Y	-	H	H	H	H	-	H	G	H	H	G	G	G	H	-	H	G	-	H	G	H	H	H	H	Y	G	G	H
AX-183590132	I	35.88	Chr2	92006495	1.22e-27	chr2LG1	65305712			G	H	H	G	G	G	G	H	G	H	G	Y	Y	H	H	H	H	G	H	G	H	H	-	G	G	H	G	H	H	Y	H	G	H	H	H	H	Y	G	G	H
AX-183894216	I	35.88	Chr2	92259325	2.61e-29	chr1LG6	98610734			G	H	H	G	G	G	G	H	G	H	G	Y	Y	H	H	H	H	G	H	G	H	H	H	G	G	H	G	H	H	-	H	G	-	H	H	H	Y	G	G	H
AX-183862669	I	35.88	Chr2	92814267	5.65e-26	chr2LG1	66165393			G	H	H	G	G	G	G	H	G	H	-	Y	-	H	H	H	H	G	H	G	H	H	G	G	G	H	G	H	H	Y	H	G	H	H	H	H	Y	G	G	H
AX-183580061	I	35.88	Chr2	92938589	1.22e-27	chr7LG7	77773500			G	H	H	G	G	G	G	H	G	H	G	Y	-	H	H	H	H	G	H	G	H	H	G	G	G	H	G	H	H	-	H	G	H	H	H	H	Y	G	G	H
AX-183865903	I	35.88	Chr2	92961731	5.65e-26	scaffold03629	14701			G	H	H	G	G	G	G	H	G	H	G	Y	Y	H	H	H	H	G	H	G	H	H	G	-	G	H	G	H	H	Y	H	G	H	H	H	H	Y	G	G	H
AX-183590147	I	35.88	Chr2	93328643	2.61e-29	chr2LG1	66769783			G	H	H	G	G	G	G	H	G	H	G	Y	Y	H	H	H	H	-	H	G	H	H	-	G	G	H	G	H	H	Y	H	G	H	H	H	H	Y	G	G	H
AX-183564293	I	36.37	Chr2	94048984	2.61e-29	chr2LG1	66488225			G	H	H	G	G	G	G	H	G	H	G	Y	-	H	H	H	H	G	H	G	H	H	G	G	G	H	G	H	H	Y	H	G	H	H	H	H	Y	G	G	H
AX-183863531	I	36.5	Chr2	94089108	2.61e-29	chr2LG1	66538708			G	H	H	G	G	G	G	H	G	H	G	Y	Y	H	-	H	H	G	H	G	H	H	G	G	G	G	-	H	H	Y	H	G	H	H	H	H	Y	G	G	H
AX-183877022	I	36.5	Chr2	94089303	1.22e-27	chr2LG1	66538903			G	H	H	G	G	G	G	H	G	H	G	Y	Y	H	H	H	H	G	H	G	H	H	G	G	G	H	-	H	H	Y	H	G	H	H	H	H	Y	G	G	H
AX-183862937	I	36.62	Chr2	94755179	2.61e-29	chr2LG1	67373830			G	H	H	G	G	G	G	H	G	H	G	Y	H	H	H	H	H	G	H	G	H	H	G	G	G	H	-	H	H	Y	H	G	H	H	H	H	Y	G	G	H
AX-183861576	I	36.62	Chr2	94772273	1.22e-27	chr2LG1	67356154			G	H	H	G	G	G	G	H	G	H	G	Y	Y	H	H	H	H	-	H	G	H	H	G	G	G	H	-	H	H	Y	H	G	H	H	H	H	Y	G	G	H
AX-183590172	I	36.62	Chr2	95251581	5.65e-26	chr2LG1	68903259			G	Y	H	G	G	G	G	H	-	H	G	Y	Y	H	-	H	H	G	-	G	H	H	G	H	G	H	H	H	H	H	H	G	H	H	G	H	Y	G	G	H
AX-183564298	I	36.75	Chr2	95357504	2.61e-29	chr2LG1	68925883			G	H	H	G	G	G	G	H	G	H	G	Y	Y	H	H	H	H	G	H	G	H	H	G	G	G	H	G	H	H	-	H	G	H	H	H	H	Y	G	G	H
AX-183867362	I	36.75	Chr2	95357686	1.22e-27	chr2LG1	68926087			G	H	H	G	G	G	G	H	G	H	G	Y	-	H	H	H	H	G	H	G	-	H	G	G	G	H	G	H	H	-	H	G	H	H	H	H	Y	G	G	H
AX-183861360	I	36.75	Chr2	95458119	2.61e-29	chr2LG1	78853796			G	H	H	G	G	G	G	H	G	H	G	Y	-	H	H	H	H	G	H	G	H	H	G	G	G	H	-	H	H	-	H	G	H	H	H	H	Y	G	G	H
AX-183875581	I	36.75	Chr2	95458874	1.22e-27	chr2LG1	78854559			G	H	H	G	G	G	G	H	G	H	G	Y	Y	H	H	H	H	G	H	G	H	H	G	G	G	H	G	H	H	-	H	G	H	H	H	H	Y	G	G	H
AX-183590184	I	36.75	Chr2	95459600	1.22e-27	chr2LG1	78855285			G	H	H	G	G	G	G	H	G	H	G	Y	Y	H	H	H	H	G	H	G	H	H	G	G	G	H	-	H	H	-	H	G	H	H	H	H	Y	G	G	H
AX-183877024	I	36.75	Chr2	95460428	1.22e-27	chr2LG1	78856113			G	H	H	G	G	G	G	H	G	H	G	Y	Y	H	H	H	H	G	H	G	H	H	G	G	G	H	-	H	H	Y	H	G	H	H	H	H	Y	G	G	H
AX-183564299	I	36.75	Chr2	95828203	1.22e-27	chr2LG1	67980510			G	H	H	G	G	G	G	H	G	H	G	Y	-	H	H	H	H	G	H	G	H	H	G	G	G	H	G	H	H	-	H	G	H	H	H	H	Y	G	G	H
AX-183880058	I	36.99	Chr2	109007456	2.61e-29	chr2LG1	75375308			G	H	H	G	G	H	G	H	G	H	G	Y	Y	H	H	H	H	G	H	G	H	H	G	G	G	H	G	H	H	Y	H	G	H	H	H	H	Y	G	G	H
AX-183564309	I	36.99	Chr2	109008130	1.22e-27	chr2LG1	75374634			G	H	H	G	G	H	G	H	G	H	G	Y	-	H	H	H	H	G	H	G	H	H	G	G	G	H	G	H	H	-	H	G	H	H	H	H	Y	G	G	H
AX-183576022	I	36.99	Chr2	109438018	1.22e-27	chr2LG1	77957275			G	H	H	G	G	H	G	H	G	H	G	Y	Y	H	H	H	H	G	H	G	H	H	G	G	G	H	G	H	H	Y	H	G	H	H	H	H	Y	G	G	H
AX-183581092	I	36.99	Chr2	109439952	1.22e-27	chr2LG1	77959206			G	H	H	G	G	H	G	H	G	H	G	Y	Y	H	H	H	H	G	H	G	H	H	G	G	G	H	H	H	H	Y	H	G	H	H	H	H	Y	G	G	H
AX-183866161	I	37.12	Chr2	109469008	9.39e-29	chr2LG1	75723490			G	H	H	G	G	H	G	-	G	-	G	Y	H	H	H	H	H	G	H	G	H	H	G	-	G	H	G	H	H	Y	H	G	H	H	H	H	Y	G	G	H
AX-183590212	I	37.12	Chr2	109469232	5.65e-26	chr2LG1	75723266			G	H	H	G	G	H	G	H	G	H	G	Y	Y	H	H	H	H	G	H	G	H	H	G	G	G	H	G	H	H	Y	H	G	H	H	H	H	Y	G	G	H
AX-183573691	I	37.12	Chr2	109470218	1.22e-27	chr2LG1	75722287			G	-	-	G	G	H	G	H	G	H	G	Y	-	H	H	H	H	G	H	G	H	H	G	-	G	H	G	H	H	-	H	G	H	H	H	H	Y	G	G	H
AX-183576025	I	37.12	Chr2	109481314	5.65e-26	chr2LG1	75695888			G	H	H	G	G	H	G	H	G	H	G	Y	Y	H	H	H	H	G	H	G	H	H	G	G	G	H	G	H	H	Y	H	G	H	H	H	H	Y	G	G	H
AX-183576020	I	37.37	Chr2	110184977	2.61e-29	chr2LG1	75797714			G	H	H	G	G	H	G	H	G	H	G	Y	Y	H	H	H	H	G	H	G	H	H	G	H	G	H	G	H	H	Y	H	G	H	H	H	H	Y	G	G	H
AX-183576019	I	37.37	Chr2	110205792	1.22e-27	chr2LG1	75786583			G	H	H	G	G	H	G	H	G	H	G	Y	Y	H	H	H	H	-	H	G	H	H	G	G	G	H	G	H	H	Y	H	G	H	H	H	H	Y	G	G	H
AX-183576018	I	37.37	Chr2	110219041	2.61e-29	chr2LG1	75775566			G	H	H	G	G	H	G	H	G	H	G	Y	Y	H	H	H	H	-	H	G	H	H	G	G	G	H	-	H	H	-	H	G	H	H	H	H	Y	G	G	H
AX-183564308	I	37.37	Chr2	110301611	1.22e-27	chr2LG1	75534558			G	H	H	G	G	H	G	H	G	H	G	Y	-	H	H	H	H	-	H	G	H	H	G	G	G	H	G	H	H	Y	H	G	H	H	H	H	Y	G	G	H
AX-183570627	I	37.49	Chr2	110410983	2.61e-29	chr2LG1	76048977			G	H	H	G	G	H	G	H	G	H	G	Y	Y	H	H	H	H	G	H	G	H	H	G	G	G	H	G	H	H	Y	H	G	H	H	H	H	Y	G	G	H
AX-183576024	I	37.49	Chr2	110411105	2.61e-29	chr2LG1	76048855			G	H	H	G	G	H	G	H	G	H	G	Y	Y	H	H	H	H	G	H	G	H	H	G	G	G	H	G	H	H	Y	H	G	H	H	H	H	Y	G	G	H
AX-183861577	I	37.49	Chr2	110414309	1.22e-27	chr2LG1	76045657			G	H	H	G	G	H	G	H	G	H	G	Y	Y	H	H	H	H	G	H	G	H	H	G	H	G	H	-	H	H	-	H	G	H	H	H	H	Y	G	G	H
AX-183576023	I	37.49	Chr2	110414916	2.61e-29	chr2LG1	76045050			G	H	H	G	G	H	G	H	G	H	G	Y	Y	H	H	H	H	-	H	G	H	H	G	G	G	H	G	H	H	Y	H	G	H	H	H	H	Y	G	G	H
AX-183638324	I	37.49	Chr2	110415306	1.22e-27	chr2LG1	76044659			G	H	H	G	G	H	G	H	G	H	G	Y	Y	H	H	H	H	-	H	G	H	H	G	G	G	H	-	H	H	Y	H	G	H	H	H	H	Y	G	G	H
AX-183564310	I	37.49	Chr2	110511288	2.61e-29	chr2LG1	75921694			G	H	H	G	G	H	G	H	G	H	G	Y	Y	H	H	H	H	G	H	G	H	H	G	G	G	H	G	H	H	-	H	G	H	H	H	H	Y	G	G	H
AX-183570628	I	37.61	Chr2	110980103	1.22e-27	chr2LG1	78247540			G	H	H	G	G	H	G	H	G	H	G	Y	Y	H	H	H	H	G	H	G	H	H	G	G	G	H	H	H	H	Y	H	G	H	H	H	H	Y	G	G	H
AX-183573702	I	38.36	Chr2	112638121	1.22e-27	chr2LG1	79382495			G	H	H	G	G	H	G	H	G	H	G	Y	Y	H	H	H	H	G	H	G	H	H	G	G	G	H	H	H	H	-	H	G	H	H	H	H	Y	G	G	H
AX-183590227	I	38.36	Chr2	112648950	5.65e-26	chr2LG1	79371346			G	H	H	G	G	H	G	H	G	H	G	Y	Y	H	H	H	H	G	H	G	H	H	G	G	G	H	H	H	H	Y	H	G	H	H	H	H	Y	G	G	H
AX-183573701	I	38.36	Chr2	112651777	2.61e-29	chr2LG1	79368513			G	H	H	G	G	H	G	H	G	H	G	Y	Y	H	H	H	H	G	H	G	H	H	G	G	G	H	-	H	H	Y	H	G	H	H	H	H	Y	G	G	H
AX-183873556	I	38.36	Chr2	112716640	5.65e-26	chr2LG1	79313340			G	H	H	G	G	H	G	H	G	H	G	Y	Y	H	H	H	H	G	H	G	H	H	G	G	G	H	G	H	H	Y	H	G	H	H	H	H	Y	G	G	H
AX-183573700	I	38.36	Chr2	112717111	1.22e-27	chr2LG1	79312869			G	H	H	G	G	H	G	H	G	H	G	Y	Y	H	H	H	H	G	H	G	H	H	G	G	G	H	H	H	H	Y	H	G	H	H	H	H	Y	G	G	H
AX-183576027	I	38.36	Chr2	113405621	1.22e-27	chr2LG1	81478121			G	H	H	G	G	H	G	H	G	H	G	Y	Y	H	H	H	H	-	H	G	H	H	G	-	G	H	H	H	H	Y	H	G	H	H	H	H	Y	G	G	H
AX-183573703	I	38.36	Chr2	113457004	1.22e-27	chr2LG1	79641708			G	H	H	G	G	H	G	H	G	H	G	Y	-	H	H	H	H	G	H	G	H	H	G	G	G	H	G	H	H	Y	-	G	-	H	H	H	Y	G	G	H
AX-183866949	I	38.36	Chr2	113457180	5.65e-26	chr2LG1	79641532			G	H	H	G	G	H	G	H	G	H	G	Y	Y	H	H	H	H	G	H	G	H	H	G	-	G	H	G	H	H	Y	H	G	H	H	H	H	Y	G	G	H
AX-183581094	I	38.36	Chr2	113478088	2.61e-29	chr2LG1	80470276			G	H	H	G	G	H	G	H	G	H	G	Y	Y	H	H	H	H	G	H	G	H	H	G	G	G	H	H	H	H	Y	H	G	H	H	H	H	Y	G	G	H
AX-183564315	I	38.36	Chr2	113478796	2.61e-29	chr2LG1	80470984			G	H	H	G	G	H	G	H	G	H	G	Y	Y	H	H	H	H	-	H	G	H	H	G	G	G	H	-	H	H	Y	H	G	H	H	H	H	Y	G	G	H
AX-183874306	I	38.36	Chr2	113642833	1.22e-27	chr2LG1	80739437			G	H	H	G	G	H	G	H	G	H	G	Y	Y	H	H	H	H	H	H	G	H	H	G	G	G	H	H	H	H	-	H	G	H	H	H	H	Y	G	G	H
AX-183581095	I	38.36	Chr2	113649945	5.65e-26	chr2LG1	80794029			G	H	H	G	G	H	G	H	G	H	G	Y	Y	H	H	H	H	-	H	G	H	H	G	-	G	H	G	H	H	Y	H	G	H	H	H	H	Y	G	G	H
AX-183581096	I	38.36	Chr2	113649983	1.57e-26	chr2LG1	80794065			G	H	H	G	G	H	G	H	G	H	G	Y	Y	H	H	H	H	G	H	G	H	H	G	G	G	H	-	H	H	Y	H	G	H	H	H	H	Y	G	G	H
AX-183562855	I	38.49	Chr2	113650215	2.61e-29	chr2LG1	80794299			G	H	H	G	G	H	G	H	G	H	G	Y	Y	H	H	H	H	G	H	G	H	H	G	G	G	H	-	H	H	Y	H	G	H	H	H	H	Y	G	G	H
AX-183564321	I	38.98	Chr2	114012921	2.61e-29	chr2LG1	82903052			G	H	H	G	G	H	G	H	G	H	G	Y	Y	H	H	H	H	G	H	G	H	H	G	G	G	H	G	H	H	Y	H	G	H	H	H	H	Y	G	G	H
AX-183564322	I	38.98	Chr2	114014172	2.61e-29	chr2LG1	82904321			G	H	H	-	G	H	G	H	G	H	G	Y	Y	H	H	H	H	G	-	G	H	H	G	G	G	H	-	H	H	Y	H	G	H	H	H	H	Y	G	G	H
AX-183576029	I	39.11	Chr2	114549501	5.65e-26	chr2LG1	83593311			G	H	H	G	G	H	G	H	G	H	G	Y	Y	H	H	H	H	G	H	G	H	H	G	G	G	H	H	H	H	Y	H	G	H	H	H	H	Y	G	G	H
AX-183581101	I	39.11	Chr2	115036124	1.57e-26	chr2LG1	83094685			G	H	H	G	G	H	G	H	G	H	G	Y	Y	H	H	H	H	G	H	G	H	H	G	G	G	H	-	H	H	Y	H	G	H	H	H	H	Y	G	G	H
AX-183861963	I	39.11	Chr2	115036211	2.61e-29	chr2LG1	83094598			G	H	H	G	G	H	G	H	G	H	G	Y	H	H	H	H	H	-	H	G	H	H	G	G	G	H	-	H	H	Y	H	G	H	H	H	H	Y	G	G	H
AX-183576036	I	39.11	Chr2	115036511	2.61e-29	chr2LG1	83094298			G	H	H	G	G	H	G	H	G	H	G	Y	Y	H	H	H	H	-	H	G	H	H	G	G	G	H	-	H	H	Y	H	G	H	H	H	H	Y	G	G	H
AX-183564325	I	39.11	Chr2	115095403	2.61e-29	chr2LG1	83025684			G	H	H	G	G	H	G	H	G	H	G	Y	Y	H	H	H	H	G	H	G	H	H	G	G	G	H	-	H	H	Y	H	G	H	H	H	H	Y	G	G	H
AX-183576030	I	39.23	Chr2	115441155	2.61e-29	chr2LG1	82513689			G	H	H	G	G	H	G	H	G	H	G	Y	Y	H	H	H	H	G	H	G	H	H	G	G	G	H	-	H	H	-	H	G	H	H	H	H	Y	G	G	H
AX-183590248	I	39.23	Chr2	115443811	2.61e-29	chr2LG1	82511043			G	H	H	G	G	H	G	H	G	H	G	Y	-	H	H	H	H	H	H	G	H	H	G	G	G	H	G	H	H	Y	H	G	H	H	H	H	Y	G	G	H
AX-183590250	I	39.36	Chr2	116756075	1.22e-22	super-scaffold9065	1682			G	H	H	G	G	-	G	-	G	H	G	Y	Y	H	H	H	H	G	H	-	H	H	G	-	G	H	H	H	H	Y	-	G	Y	H	H	H	Y	G	G	H
AX-183574910	I	39.36	Chr2	117742546	2.61e-29	chr2LG1	83694708			G	H	H	G	G	H	G	H	G	H	G	Y	Y	H	H	H	H	H	H	G	H	H	G	G	G	H	-	H	H	H	H	G	H	H	H	H	Y	G	G	H
AX-183564327	I	39.6	Chr2	118264786	1.22e-27	chr2LG1	88502244			G	H	H	G	G	H	G	H	G	H	G	Y	Y	H	H	H	H	G	H	G	H	H	G	G	G	H	G	H	H	Y	H	G	-	H	H	H	Y	G	G	H
AX-183564326	I	39.6	Chr2	118299987	1.22e-27	chr2LG1	88471160			G	H	H	G	G	H	G	H	G	H	G	Y	Y	H	H	H	H	G	H	G	H	H	G	G	G	H	G	H	H	Y	H	G	H	H	H	H	Y	G	G	H
AX-183573704	I	39.73	Chr2	118303292	2.61e-29	chr2LG1	88467750			G	H	H	G	G	H	G	H	G	H	G	Y	Y	H	H	H	H	G	H	G	H	H	G	G	G	H	H	H	H	Y	H	G	H	H	H	H	Y	G	G	H
AX-183863398	I	39.98	Chr2	120157947	7.31e-25	chr2LG1	84787328			G	H	H	G	G	H	G	H	G	H	G	Y	Y	H	H	H	H	G	H	G	H	H	G	G	G	H	H	H	H	-	H	G	H	H	H	H	Y	G	G	H
AX-183865402	I	39.98	Chr2	120238246	5.65e-26	chr2LG1	84818939			G	H	H	G	G	H	G	H	G	H	G	Y	Y	H	H	H	H	G	H	G	H	H	G	G	G	H	H	H	H	-	H	G	H	H	H	H	Y	G	G	H
AX-183576033	I	39.98	Chr2	120238477	2.61e-29	chr2LG1	84819169			G	H	H	G	G	H	G	H	G	H	G	Y	Y	H	H	H	H	G	H	G	H	H	G	G	G	H	H	H	H	Y	H	G	H	H	H	H	Y	G	G	H
AX-183876526	I	39.98	Chr2	120240141	2.61e-29	chr2LG1	84820831			G	H	H	G	G	H	G	H	G	H	G	Y	Y	H	H	H	H	G	H	G	H	H	G	G	G	H	-	H	H	Y	H	G	H	H	H	H	Y	G	G	H
AX-183866798	I	39.98	Chr2	120274166	2.61e-29	chr2LG1	84895791			G	H	H	G	G	H	G	H	G	H	G	Y	Y	H	H	H	H	-	H	G	H	H	G	G	G	H	H	H	H	Y	H	G	H	H	H	H	Y	G	G	H
AX-183564323	I	40.72	Chr2	122051026	2.61e-29	chr2LG1	86025863			G	H	H	G	G	H	G	H	G	H	G	Y	Y	H	H	H	H	G	H	G	H	H	G	G	G	H	G	H	H	-	H	G	H	H	H	H	Y	G	G	H
AX-183861229	I	40.85	Chr2	122126542	2.61e-29	chr2LG1	89089456			G	H	H	G	G	H	G	H	G	H	G	Y	Y	H	H	H	H	G	H	G	H	H	G	G	G	H	G	H	H	Y	H	G	H	H	H	H	Y	G	G	H
AX-183564333	I	40.85	Chr2	122127049	1.22e-27	chr2LG1	89088949			G	H	H	G	G	H	G	H	G	H	G	Y	Y	H	H	H	H	G	H	G	H	H	G	G	G	H	H	H	H	Y	H	G	H	H	H	H	Y	G	G	H
AX-183576040	I	40.85	Chr2	122236685	2.61e-29	chr2LG1	89747220			G	H	H	G	G	H	G	H	G	H	G	Y	Y	H	H	H	H	G	H	G	H	H	G	G	G	H	-	H	H	Y	H	G	H	H	H	H	Y	G	G	H
AX-183590269	I	40.85	Chr2	122241572	2.61e-29	chr2LG1	89742327			G	-	H	G	G	H	G	H	G	H	G	Y	H	H	H	H	H	G	H	G	H	H	G	G	G	H	G	H	H	H	H	G	H	H	H	H	Y	G	G	H
AX-183576039	I	40.85	Chr2	122242036	1.22e-27	chr2LG1	89741863			G	H	H	G	G	H	G	H	G	H	G	Y	Y	H	H	H	H	G	H	G	H	H	G	G	G	H	G	H	H	Y	H	G	Y	H	H	H	Y	G	G	H
AX-183864300	I	40.97	Chr2	122482730	1.22e-27	chr2LG1	89489565			G	H	H	G	G	H	G	H	G	H	G	Y	Y	H	H	H	H	-	H	G	Y	H	G	-	G	H	H	H	H	Y	H	G	H	H	H	H	Y	G	G	H
AX-183564329	I	40.97	Chr2	122734042	2.61e-29	chr2LG1	89241405			G	H	H	G	G	H	G	H	G	H	G	Y	Y	H	H	H	H	G	H	G	-	H	G	G	G	H	H	H	H	Y	H	G	H	H	H	H	Y	G	G	H
AX-183865461	I	41.1	Chr2	123816472	1.22e-27	chr2LG1	88073229			G	H	H	G	G	H	G	H	G	H	G	Y	Y	H	H	H	H	-	H	G	-	H	G	G	G	H	H	H	H	-	H	G	H	H	H	H	Y	G	G	H
AX-183892818	I	41.1	Chr2	126667150	2.63e-24	chr2LG1	92360313			G	-	H	G	G	H	G	H	G	H	G	Y	Y	H	H	H	H	G	H	G	H	H	G	G	G	H	H	H	H	Y	H	G	H	H	H	H	Y	G	G	H
AX-183590271	I	41.22	Chr2	126667335	1.22e-27	chr2LG1	92360498			G	H	H	G	G	H	G	H	G	H	G	Y	Y	H	H	H	H	G	H	G	Y	H	G	G	G	H	G	H	H	Y	H	G	H	H	H	H	Y	G	G	H
AX-183576041	I	41.22	Chr2	126667985	1.22e-27	chr2LG1	92361116			G	H	H	G	G	H	G	H	G	H	G	Y	H	H	H	H	H	G	H	G	Y	H	G	G	G	H	H	H	H	Y	H	G	H	H	H	H	Y	G	G	H
AX-183865403	I	41.34	Chr2	128244618	5.65e-26	chr2LG1	90467096			G	H	H	G	G	H	G	H	G	H	G	Y	Y	H	H	H	H	-	H	G	Y	H	G	G	G	H	G	H	H	Y	H	G	H	H	H	H	Y	G	G	H
AX-183564339	I	41.34	Chr2	128545746	2.61e-29	chr2LG1	90787540			G	H	H	G	G	H	G	H	G	H	G	Y	Y	H	H	H	H	G	H	G	Y	H	G	H	G	H	H	H	H	Y	H	G	H	H	H	H	Y	G	G	H
AX-183581103	I	41.34	Chr2	128833229	1.22e-27	chr2LG1	91574581			G	H	H	G	G	H	G	H	G	H	G	Y	Y	H	H	H	H	G	H	G	Y	H	G	G	G	H	H	H	H	Y	H	G	H	H	H	H	Y	G	G	H
AX-183576046	I	41.72	Chr2	129884994	2.61e-29	chr2LG1	93208797			G	H	H	G	G	H	G	H	G	H	G	Y	Y	H	H	H	G	G	H	G	Y	H	G	G	G	H	G	H	H	Y	H	G	H	H	H	H	Y	G	G	H
AX-183866246	I	41.84	Chr2	130481418	2.61e-29	chr2LG1	93463852			G	H	H	G	G	H	G	H	G	H	G	Y	Y	H	H	H	H	-	G	G	Y	H	G	G	G	H	G	H	H	Y	H	G	H	H	H	H	Y	G	G	H
AX-183564340	I	41.84	Chr2	130487918	1.22e-27	chr2LG1	93457350			G	H	H	G	G	H	G	H	G	H	G	Y	-	H	H	H	H	G	G	G	Y	H	G	G	G	H	H	H	H	Y	H	G	H	H	H	H	Y	G	G	H
AX-183576048	I	41.84	Chr2	131600487	2.61e-29	chr2LG1	94840073			G	H	H	G	G	H	G	H	G	H	H	Y	Y	H	H	H	-	G	G	G	Y	H	G	G	G	H	-	H	H	Y	H	G	H	H	H	H	Y	G	G	H
AX-183590299	I	42.59	Chr2	133165964	5.65e-26	scaffold02794	169091			G	H	H	G	G	H	G	H	G	H	G	Y	Y	H	H	H	H	-	G	G	-	H	G	G	G	H	H	H	H	Y	H	G	H	H	H	H	Y	G	G	H
AX-183879019	I	42.59	Chr2	133203733	1.22e-27	scaffold02794	60857			G	H	H	G	G	H	G	H	G	H	G	Y	Y	H	H	H	H	G	G	G	Y	H	G	G	G	H	G	H	H	Y	H	G	H	H	H	H	Y	G	G	H
AX-183867772	I	42.59	Chr2	133389290	1.22e-27	chr2LG1	96259853			G	H	H	G	G	H	G	H	G	H	G	Y	Y	H	H	H	H	G	G	G	-	H	G	G	G	H	H	H	H	Y	H	G	H	H	H	H	Y	G	G	H
AX-183581105	I	42.59	Chr2	133401716	2.61e-29	chr2LG1	96247405			G	H	H	G	G	H	G	H	G	H	G	Y	Y	H	H	H	H	G	G	G	-	H	G	G	G	H	H	H	H	Y	H	G	H	H	H	H	Y	G	G	H
AX-183882733	I	42.71	Chr2	133432007	2.61e-29	scaffold01608	23739			H	H	H	G	G	H	G	H	G	H	G	Y	Y	H	H	H	-	G	G	G	Y	H	G	G	G	H	-	H	H	Y	H	G	G	H	H	H	Y	-	G	H
AX-183861578	I	43.21	Chr2	135031263	2.61e-29	chr2LG1	96868235			G	H	H	G	G	H	G	H	G	H	G	Y	Y	H	H	H	H	G	G	G	-	H	G	G	G	H	H	H	H	-	H	G	H	H	H	H	Y	G	G	G
AX-183564341	I	43.21	Chr2	135032716	1.22e-27	chr2LG1	96869688			G	H	H	G	G	H	G	H	G	H	G	Y	Y	H	H	H	H	G	G	G	Y	H	G	G	G	H	H	H	H	Y	H	G	H	H	H	H	Y	G	G	G
AX-183564343	I	43.21	Chr2	135036270	1.22e-27	chr2LG1	96873251			G	H	H	G	G	H	G	H	G	H	G	Y	Y	H	H	H	H	G	-	G	Y	H	G	G	G	H	H	H	H	Y	H	G	H	H	H	H	Y	G	G	G
AX-183864872	I	43.21	Chr2	135083325	1.22e-27	chr2LG1	96321187			G	H	H	G	G	H	G	H	G	H	G	Y	Y	H	H	H	H	G	G	G	Y	H	G	-	G	H	G	H	H	Y	H	G	H	H	H	H	Y	G	G	G
AX-183574911	I	43.33	Chr2	135280177	2.63e-24	chr2LG1	96480089			G	H	H	G	G	H	G	H	G	H	G	Y	Y	H	H	H	H	G	G	G	H	H	G	G	G	H	H	H	H	Y	H	G	H	H	H	H	Y	G	G	G
AX-183883384	I	43.33	Chr2	135281491	1.22e-27	chr2LG1	96481403			G	H	H	-	-	H	G	H	G	H	G	Y	H	H	H	H	H	-	H	G	H	H	G	H	G	H	G	H	H	H	H	G	H	H	H	H	Y	G	G	G
AX-183576051	I	43.33	Chr2	135445583	2.61e-29	chr2LG1	96846756			G	H	H	G	G	H	G	H	G	H	G	Y	Y	H	H	H	H	G	G	G	H	H	G	-	G	H	G	H	H	Y	H	G	H	H	H	H	Y	G	G	G
AX-183564345	I	43.71	Chr2	136084177	1.22e-27	chr2LG1	95964891			G	H	H	G	G	H	G	H	G	H	G	Y	Y	H	H	H	H	G	G	G	Y	H	G	G	G	H	G	H	H	Y	H	G	H	H	H	H	Y	G	H	G
AX-183576054	I	43.83	Chr2	136937683	2.61e-29	chr2LG1	97291682			G	H	H	G	G	H	G	H	G	H	G	Y	Y	H	H	H	H	H	G	G	Y	H	G	H	G	H	H	H	H	Y	H	G	Y	H	H	H	Y	G	H	G
AX-183875148	I	43.83	Chr2	137022450	2.61e-29	chr2LG1	97350192			G	H	H	G	G	H	G	H	G	H	G	Y	Y	H	H	H	H	H	G	G	Y	H	G	H	G	H	-	H	H	Y	H	G	H	H	H	H	Y	G	H	G
AX-183564346	I	43.83	Chr2	137023876	2.61e-29	chr2LG1	97351618			G	H	H	G	G	H	G	H	G	H	G	Y	Y	H	H	H	H	G	G	G	Y	H	G	G	G	H	G	H	H	-	H	G	Y	H	H	H	Y	G	H	G
AX-183866247	I	43.95	Chr2	137027790	2.61e-29	chr2LG1	97355532			G	H	H	G	G	H	G	H	G	H	G	Y	Y	H	H	H	H	G	G	G	H	H	G	G	G	H	H	H	H	-	H	G	H	H	H	H	Y	G	H	G
AX-183888097	I	43.95	Chr2	137028398	2.61e-29	chr2LG1	97356135			G	H	H	G	G	H	G	H	G	H	G	Y	Y	H	H	H	H	G	G	G	H	H	G	G	G	H	G	H	H	Y	H	G	H	H	H	H	Y	G	H	G
AX-183873930	I	43.95	Chr6	467117135	2.09e-05	chr2LG1	97379948			G	H	H	G	G	-	G	H	G	H	G	Y	H	H	H	H	H	G	G	G	Y	H	G	H	G	H	-	H	H	Y	H	G	Y	H	H	H	Y	G	H	G
AX-183564347	I	44.2	Chr2	138449944	2.61e-29	chr2LG1	98235969			G	H	H	G	G	H	G	H	G	H	G	Y	Y	H	H	H	H	G	G	G	Y	H	G	G	G	H	-	H	H	Y	Y	G	Y	H	H	H	Y	G	H	G
AX-183576055	I	44.2	Chr2	138349899	2.61e-29	chr2LG1	98117289			G	H	H	G	G	H	G	H	G	H	G	Y	Y	H	H	H	H	-	G	G	Y	H	G	G	G	H	H	H	H	Y	Y	G	Y	H	H	H	Y	G	H	G
AX-183576058	I	44.33	Chr2	138911947	1.22e-27	chr2LG1	98644338			G	H	H	G	G	H	G	H	G	H	G	Y	Y	H	H	H	H	G	G	G	Y	H	G	G	G	H	-	H	H	Y	Y	G	Y	H	H	H	Y	G	H	G
AX-183570647	I	44.45	Chr2	138913880	1.22e-27	chr2LG1	98646271			G	H	H	G	G	H	G	H	G	H	G	Y	Y	H	H	H	H	-	G	G	Y	H	G	G	G	H	H	H	H	Y	Y	G	Y	H	H	H	Y	G	H	G
AX-183877977	I	44.45	Chr2	139000923	1.22e-27	chr2LG1	98741588			G	H	H	G	G	H	G	H	G	H	G	Y	Y	H	H	H	H	G	G	G	-	H	G	G	G	H	-	H	H	Y	Y	G	Y	H	H	H	Y	G	H	G
AX-183590337	I	45.2	Chr2	140454332	1.22e-27	chr2LG1	99720830			G	H	H	G	G	H	G	-	G	H	G	Y	H	H	H	H	H	-	G	G	H	H	G	-	G	H	G	H	H	Y	Y	G	Y	H	H	H	Y	G	H	G
AX-183564351	I	45.2	Chr2	140461916	1.22e-27	chr2LG1	99728344			G	H	H	G	G	H	G	H	G	H	G	Y	Y	H	H	H	H	G	G	G	-	H	-	G	G	H	G	H	H	Y	Y	G	-	H	H	H	Y	G	H	G
AX-183564353	I	45.32	Chr2	140558757	1.22e-27	chr2LG1	99757399			G	H	H	G	G	H	G	H	G	H	G	Y	Y	H	H	H	H	G	G	G	-	H	G	G	G	H	G	H	H	-	Y	G	Y	H	H	H	Y	G	H	G
AX-183590339	I	45.32	Chr2	140558911	2.61e-29	chr2LG1	99757553			G	H	H	G	G	H	G	H	G	H	G	Y	-	H	H	H	H	-	G	G	-	H	G	G	G	H	G	H	H	-	Y	G	H	H	H	H	Y	G	H	G
AX-183564354	I	45.45	Chr2	142560747	1.22e-27	chr2LG1	101260809			G	H	H	G	G	H	G	H	G	H	G	Y	Y	H	H	H	H	G	G	G	Y	H	G	G	G	H	H	H	H	Y	Y	G	Y	H	H	H	Y	G	H	G
AX-183576062	I	45.45	Chr2	142593993	2.61e-29	chr2LG1	101295209			G	H	H	G	G	H	G	H	G	H	G	Y	Y	H	H	H	H	G	G	G	Y	H	G	G	G	H	G	H	H	Y	Y	G	Y	H	H	H	Y	G	H	G
AX-183576063	I	45.45	Chr2	142594997	1.22e-27	chr2LG1	101296213			G	H	H	G	G	H	G	H	G	H	G	Y	Y	H	H	H	H	-	G	G	Y	H	G	G	G	H	H	H	H	Y	Y	G	Y	H	H	H	Y	G	H	G
AX-183573705	I	45.45	Chr2	143047800	1.22e-27	chr2LG1	102244976			G	H	H	G	G	H	G	H	G	H	G	Y	Y	H	H	H	H	G	-	G	Y	H	G	G	G	H	H	H	H	Y	Y	G	Y	H	H	H	Y	G	H	G
AX-183576064	I	45.45	Chr2	143529015	1.22e-27	chr2LG1	102113913			G	H	H	G	G	H	G	H	G	H	G	Y	Y	H	H	H	H	G	G	G	Y	H	G	G	G	H	G	H	H	Y	Y	G	Y	H	H	H	Y	G	H	G
AX-183581111	I	45.45	Chr2	143529994	1.22e-27	chr2LG1	102114892			G	H	H	G	G	H	G	H	G	H	G	Y	Y	H	H	H	H	G	G	G	Y	H	G	G	G	H	H	H	H	Y	Y	G	Y	H	H	H	Y	G	H	G
AX-183564357	I	45.45	Chr2	143780323	1.22e-27	chr2LG1	102439199			G	H	H	G	G	H	G	H	G	H	G	Y	Y	H	H	H	H	H	G	G	-	H	G	H	G	H	H	H	H	Y	Y	G	Y	H	H	H	Y	G	H	G
AX-183573707	I	45.45	Chr2	143817875	2.61e-29	chr2LG1	102468791			G	H	H	G	G	H	G	H	G	H	G	Y	Y	H	H	H	H	G	G	G	Y	H	G	H	G	H	H	H	H	Y	Y	G	H	H	H	H	Y	G	H	G
AX-183581112	I	45.45	Chr2	143817940	2.61e-29	chr2LG1	102468856			G	H	H	G	G	H	G	H	G	H	G	Y	-	H	H	H	H	G	G	G	H	H	G	G	G	H	H	H	H	Y	Y	G	Y	H	H	H	Y	G	H	G
AX-183872222	I	45.45	Chr2	143818663	2.61e-29	chr2LG1	102469504			G	H	H	G	G	H	G	H	G	H	G	Y	Y	H	H	H	H	G	G	G	Y	H	G	G	G	H	H	H	H	Y	Y	G	Y	H	H	H	Y	G	H	G
AX-183581113	I	45.45	Chr2	143930913	2.61e-29	super-scaffold6352	44958			G	H	H	G	G	H	G	H	G	H	G	Y	H	H	H	H	H	G	G	G	-	H	G	-	G	H	H	H	H	Y	Y	G	-	H	H	H	Y	G	H	G
AX-183860890	I	45.57	Chr2	144403169	1.22e-27	scaffold01688	89599			G	H	H	G	G	H	G	H	G	H	G	Y	Y	H	H	H	H	-	G	G	H	H	G	G	G	H	-	H	H	-	Y	G	-	H	H	H	Y	G	H	G
AX-183564359	I	45.57	Chr2	144953383	2.61e-29	scaffold00213	224560			-	H	H	G	G	H	G	-	G	H	G	Y	Y	H	H	H	H	G	G	G	-	H	H	G	G	H	-	H	H	-	Y	G	H	H	-	H	Y	G	H	G
AX-183576066	I	45.94	Chr2	145466158	2.61e-29	chr2LG1	102904733			G	H	H	G	G	H	G	H	G	H	G	Y	Y	H	H	H	H	G	G	G	Y	H	G	H	G	H	H	H	H	H	Y	G	Y	H	H	H	Y	G	H	G
AX-183861904	I	46.07	Chr2	145467494	2.61e-29	chr2LG1	102903385			G	H	H	G	-	H	G	H	G	H	G	Y	Y	H	H	H	-	G	-	G	Y	H	G	H	G	H	G	H	H	Y	Y	G	Y	H	H	H	Y	-	H	G
AX-183564361	I	46.07	Chr2	145647801	1.22e-27	chr2LG1	102747374			G	H	H	G	G	H	G	H	G	H	G	Y	Y	H	H	H	H	-	G	G	Y	H	G	G	G	H	H	H	H	Y	Y	G	Y	H	H	H	Y	G	H	G
AX-183564360	I	46.07	Chr2	145648404	1.22e-27	chr2LG1	102746771			G	H	H	G	G	H	G	H	G	H	G	Y	-	H	H	H	H	G	G	G	H	H	G	G	G	H	G	H	H	Y	Y	G	Y	H	H	H	Y	G	H	G
AX-183590362	I	46.07	Chr2	145948671	2.61e-29	scaffold01693	34336			G	H	H	G	G	H	G	H	G	H	G	Y	Y	H	H	H	H	G	G	G	Y	H	G	G	G	H	H	H	H	-	Y	G	Y	H	H	H	Y	G	H	G
AX-183576067	I	46.07	Chr2	146088574	2.61e-29	chr2LG1	103136477			G	H	H	G	G	H	G	H	G	H	G	Y	Y	H	H	H	H	-	G	G	Y	H	G	G	G	H	H	H	H	Y	Y	G	Y	H	H	H	Y	G	H	G
AX-183576069	I	46.07	Chr2	146279279	1.22e-27	chr2LG1	103311685			G	H	H	G	G	H	G	H	G	H	G	Y	Y	H	H	H	H	G	G	G	H	H	G	G	G	H	G	H	H	Y	Y	G	-	H	H	H	Y	G	H	G
AX-183576070	I	46.07	Chr2	146284398	2.61e-29	chr2LG1	103316839			G	H	H	G	G	H	G	H	G	H	G	Y	Y	H	H	H	H	G	G	G	-	H	G	G	G	H	H	H	H	Y	Y	G	Y	H	H	H	Y	G	H	G
AX-183564365	I	46.07	Chr2	146295976	2.61e-29	chr2LG1	103328385			G	H	H	G	G	H	G	H	G	H	G	Y	Y	H	H	H	H	G	G	G	Y	H	G	G	G	H	H	H	H	Y	Y	G	Y	H	H	H	Y	G	H	G
AX-183892819	I	46.19	Chr2	146423096	2.61e-29	chr2LG1	103350822			G	H	H	G	G	H	G	H	G	H	G	Y	Y	H	H	H	H	G	G	G	Y	H	G	G	G	H	G	H	H	Y	Y	G	H	H	H	H	Y	G	H	G
AX-183564367	I	46.44	Chr2	146757342	1.22e-27	chr2LG1	103656093			G	H	H	G	G	H	G	H	G	H	G	Y	-	H	H	H	H	G	G	G	-	H	G	G	G	H	H	Y	H	Y	Y	G	Y	H	H	H	Y	G	H	G
AX-183576072	I	46.44	Chr2	146774021	1.22e-27	chr2LG1	103672769			G	H	H	G	G	H	G	H	G	H	G	Y	Y	H	H	H	H	G	G	G	Y	H	G	-	G	H	-	Y	H	Y	Y	G	H	H	H	H	Y	G	H	G
AX-183576073	I	46.44	Chr2	146776887	1.22e-27	chr2LG1	103675784			G	H	H	G	G	H	G	H	G	H	G	Y	Y	H	H	H	H	G	G	G	Y	H	G	G	G	H	-	Y	H	Y	Y	G	Y	H	H	H	Y	G	H	G
AX-183876925	I	46.44	Chr2	146806343	5.65e-26	scaffold02367	11319			G	H	H	G	G	H	G	H	G	H	G	Y	H	H	H	H	H	G	G	G	Y	H	G	G	G	H	H	Y	H	Y	Y	G	Y	H	H	H	Y	G	H	G
AX-183576074	I	46.81	Chr2	146966015	1.22e-27	chr2LG1	103933066			G	H	H	G	G	H	G	H	G	H	G	Y	Y	H	H	H	H	G	G	G	Y	H	G	G	G	H	-	Y	H	Y	Y	G	H	H	H	H	Y	G	H	G
AX-183564368	I	46.94	Chr2	147352449	2.61e-29	chr2LG1	104285933			G	H	H	G	G	H	G	H	-	H	G	Y	Y	H	H	H	-	-	-	G	H	-	G	G	G	H	-	Y	H	Y	Y	G	Y	H	H	H	Y	G	H	G
AX-183564369	I	46.94	Chr2	147435567	1.22e-27	chr2LG1	104338932			G	H	H	G	G	H	G	H	G	H	G	Y	Y	H	H	H	H	G	G	G	H	H	G	G	G	H	G	Y	H	Y	Y	G	Y	H	H	H	Y	G	H	G
AX-183590381	I	46.94	Chr2	147438855	5.65e-26	chr2LG1	104341794			G	H	H	G	G	-	G	H	G	H	G	Y	Y	H	H	H	H	G	G	G	H	H	G	-	G	H	G	Y	H	H	Y	G	Y	H	H	H	Y	G	H	G
AX-183576076	I	46.94	Chr2	147439949	1.22e-27	chr2LG1	104343268			G	H	H	G	G	H	G	H	G	H	G	Y	-	H	H	H	H	G	G	G	H	H	G	G	G	H	-	Y	H	Y	Y	G	H	H	H	H	Y	G	H	G
AX-183576077	I	47.06	Chr2	147510966	2.61e-29	chr2LG1	104419181			G	H	H	G	G	H	G	H	G	H	G	Y	Y	H	H	H	H	G	G	G	Y	H	G	G	G	H	G	Y	H	Y	Y	G	Y	H	H	H	Y	G	H	G
AX-183862639	I	47.18	Chr2	147515710	2.61e-29	chr2LG1	104424032			G	H	H	G	G	H	G	H	G	H	G	Y	Y	H	H	H	H	G	G	G	Y	H	G	G	G	H	H	Y	H	Y	Y	G	Y	H	H	H	Y	G	H	G
AX-183885540	I	47.18	Chr2	147551783	2.61e-29	chr2LG1	104459375			G	H	H	G	G	H	G	H	G	H	G	Y	Y	H	H	H	H	-	G	G	Y	H	G	-	G	H	H	Y	H	Y	Y	G	Y	H	H	H	Y	G	H	G
AX-183590389	I	47.18	Chr2	147771607	2.61e-29	chr2LG1	104651857			G	H	H	G	G	H	G	H	G	H	G	Y	Y	H	H	H	H	G	G	G	H	H	G	G	G	H	H	Y	H	Y	Y	G	H	H	H	H	Y	G	H	G
AX-183564370	I	47.18	Chr2	147982064	2.61e-29	chr2LG1	104621717			G	H	H	G	G	H	G	H	G	H	G	Y	Y	H	H	H	H	-	G	G	Y	H	G	G	G	H	H	Y	H	Y	Y	G	Y	H	H	-	Y	G	H	G
AX-183573709	I	47.31	Chr2	147997372	2.61e-29	chr2LG1	104584020			H	H	H	G	G	H	H	H	G	H	H	Y	Y	H	H	H	H	G	G	G	-	H	G	G	-	H	H	Y	H	Y	Y	G	-	H	H	H	Y	G	H	G
AX-183573708	I	47.31	Chr2	148031541	1.22e-27	chr2LG1	104570702			G	H	H	G	G	H	G	H	G	H	G	Y	Y	H	H	H	H	G	G	G	Y	H	G	G	G	H	H	Y	H	Y	Y	G	Y	H	H	H	Y	G	H	G
AX-183576086	I	47.31	Chr2	148595435	2.61e-29	chr2LG1	107372584			G	H	H	G	G	H	G	H	G	H	G	Y	Y	H	H	H	H	G	G	G	Y	H	G	G	G	H	-	Y	H	Y	Y	G	Y	H	H	H	Y	G	H	G
AX-183590395	I	47.68	Chr2	150638553	2.61e-29	chr2LG1	106581693			G	H	H	G	G	H	G	H	G	H	G	Y	-	H	H	H	H	G	G	G	H	H	G	G	G	H	G	Y	H	Y	Y	G	Y	H	H	H	Y	G	H	G
AX-183590394	I	47.68	Chr2	150640046	1.22e-27	chr2LG1	106580200			G	H	H	G	G	H	G	H	G	H	G	Y	Y	H	H	H	H	G	G	G	-	H	G	G	G	H	G	Y	H	Y	Y	G	H	H	H	H	Y	G	H	G
AX-183884432	I	47.68	Chr2	150672851	2.61e-29	chr2LG1	106549139			G	H	H	G	G	H	G	H	G	H	G	Y	Y	H	H	H	H	G	G	G	H	H	G	G	G	H	G	Y	H	-	Y	G	Y	H	H	H	Y	G	H	G
AX-183590392	I	47.8	Chr2	150770849	2.61e-29	chr2LG1	106447507			G	H	H	G	G	H	G	H	G	H	G	Y	Y	H	H	H	H	G	G	G	H	H	G	-	G	H	-	Y	H	Y	Y	G	Y	H	H	H	Y	G	H	G
AX-183894271	I	47.8	Chr2	151081198	1.22e-27	chr2LG1	290951474			G	H	H	G	G	H	G	H	G	H	G	Y	-	H	H	H	H	G	G	G	H	H	G	G	G	H	-	Y	H	Y	Y	G	Y	H	H	H	Y	G	H	G
AX-183592025	I	47.8	Chr2	151081247	1.22e-27	chr2LG1	290951425			G	H	H	G	G	H	G	H	G	H	G	Y	Y	H	H	H	H	G	G	G	-	H	G	G	G	H	H	Y	H	Y	Y	G	-	H	H	H	Y	G	H	G
AX-183862227	I	47.93	Chr2	151222684	2.61e-29	chr2LG1	104926992			G	H	H	G	G	H	G	H	G	H	G	Y	Y	H	H	H	H	G	G	G	-	H	G	G	G	H	G	Y	H	Y	Y	G	Y	H	H	H	Y	G	H	G
AX-183576080	I	47.93	Chr2	151227310	2.61e-29	chr2LG1	104931618			G	H	H	G	G	H	G	H	G	H	G	Y	Y	H	H	H	H	G	G	G	H	H	G	G	G	H	G	Y	H	Y	Y	G	-	H	H	H	Y	G	H	G
AX-183564372	I	47.93	Chr2	151311903	2.61e-29	chr2LG1	104994730			G	H	H	G	G	H	G	H	G	H	G	Y	-	H	H	H	H	G	G	G	H	H	G	G	G	H	-	Y	H	-	Y	G	-	H	H	H	Y	G	H	G
AX-183573711	I	47.93	Chr2	152162054	2.61e-29	chr2LG1	108371702			G	H	H	G	G	H	G	H	G	H	G	Y	-	H	H	H	H	H	G	G	H	H	G	G	G	H	G	Y	H	-	Y	G	Y	H	H	H	Y	G	H	G
AX-183576089	I	47.93	Chr2	152166756	2.61e-29	chr2LG1	108367000			G	H	H	G	G	H	-	-	G	H	G	Y	Y	H	H	H	H	G	G	G	H	H	G	G	G	H	G	Y	H	Y	Y	G	H	H	H	H	Y	G	H	G
AX-183880593	I	47.93	Chr2	152171847	1.22e-27	chr2LG1	108361909			G	H	H	G	G	H	G	H	G	H	G	Y	Y	H	H	H	H	G	G	G	-	H	G	G	G	H	G	Y	H	Y	Y	G	Y	H	H	H	Y	G	H	G
AX-183573713	I	48.3	Chr2	153733323	2.61e-29	chr2LG1	109780439			G	H	-	G	G	H	G	H	G	H	G	Y	Y	-	-	H	H	G	H	G	Y	H	G	G	G	H	G	Y	H	Y	Y	G	-	H	H	H	Y	G	H	G
AX-183861104	I	48.3	Chr2	153792938	2.61e-29	chr2LG1	109840704			G	H	H	G	G	H	G	H	G	H	G	Y	-	H	H	H	H	G	G	G	H	H	G	G	G	H	G	Y	H	-	Y	G	-	H	H	H	Y	G	H	G
AX-183564378	I	48.3	Chr2	153941247	2.61e-29	chr2LG1	109977140			G	-	H	-	G	H	G	H	G	H	G	Y	Y	H	H	H	H	G	G	G	-	H	G	-	G	H	-	Y	H	-	-	G	H	H	-	H	Y	G	H	G
AX-183564381	I	48.42	Chr2	154416777	2.61e-29	chr2LG1	110574281			G	H	H	G	G	H	G	H	G	H	G	Y	Y	H	H	H	H	G	G	G	Y	H	G	-	G	H	H	Y	H	Y	Y	G	Y	H	H	H	Y	G	H	G
AX-183866268	I	48.67	Chr2	155019713	1.22e-27	chr2LG1	115605935			G	H	H	G	G	H	G	H	G	H	G	Y	Y	H	H	H	H	G	G	G	H	H	G	G	G	H	G	Y	H	Y	Y	G	Y	H	H	H	Y	G	H	G
AX-183576096	I	48.67	Chr2	155020624	2.61e-29	chr2LG1	115605024			G	H	H	G	G	H	G	H	G	H	G	Y	H	H	H	H	H	G	G	G	H	H	G	G	G	H	G	Y	H	Y	H	G	Y	H	H	H	Y	G	H	G
AX-183590431	I	48.92	Chr2	156050919	1.22e-27	chr2LG1	112483513			G	H	H	G	G	H	H	H	G	H	G	Y	Y	H	-	H	H	G	H	G	H	H	G	G	G	H	H	Y	H	-	-	G	Y	-	H	H	Y	G	H	G
AX-183573715	I	48.92	Chr2	156173733	2.61e-29	chr2LG1	112520051			G	H	H	G	G	H	H	H	G	H	G	Y	-	H	H	H	H	G	G	G	Y	H	G	H	G	H	H	Y	H	Y	Y	G	Y	H	H	H	Y	G	H	G
AX-183564385	I	48.92	Chr2	156788655	2.61e-29	chr2LG1	112786053			G	H	H	G	G	H	H	H	G	H	G	Y	Y	H	H	H	H	G	G	G	-	H	G	G	G	H	H	Y	H	Y	Y	G	Y	H	H	H	Y	G	H	G
AX-183864133	I	48.92	Chr2	158844252	1.22e-27	chr2LG1	113259931			G	H	H	G	G	H	H	H	G	H	G	Y	Y	H	H	H	H	G	G	G	Y	H	G	G	G	H	H	Y	H	Y	Y	G	Y	H	H	H	Y	G	H	G
AX-183576091	I	48.92	Chr2	158807395	1.22e-27	chr2LG1	113217969			G	H	H	G	G	H	H	H	G	H	G	Y	Y	H	H	H	H	G	G	G	Y	H	G	G	G	H	-	Y	H	Y	Y	G	Y	H	H	H	Y	G	H	G
AX-183576093	I	48.92	Chr2	158772914	1.22e-27	chr2LG1	114221426			G	H	H	G	G	H	H	H	G	H	G	Y	Y	H	H	H	H	G	G	G	-	H	G	G	G	H	H	Y	H	Y	Y	G	Y	H	H	H	Y	G	H	G
AX-183564389	I	48.92	Chr2	158609878	1.22e-27	chr2LG1	114669991			G	H	H	G	G	H	H	H	G	H	G	Y	Y	H	H	H	H	G	G	G	Y	H	G	G	G	H	-	Y	H	Y	Y	G	Y	H	H	H	Y	G	H	G
AX-183863538	I	49.04	Chr2	158600142	2.61e-29	chr2LG1	114679727			G	H	H	G	G	H	H	H	G	H	G	Y	-	H	H	H	H	-	G	G	H	H	G	G	G	H	-	Y	H	Y	Y	G	Y	H	H	H	Y	G	H	G
AX-183576090	I	49.04	Chr2	158545567	1.22e-27	chr2LG1	114723638			G	H	H	G	G	H	H	H	G	H	G	Y	Y	H	H	H	H	G	G	G	H	H	G	G	G	H	-	Y	H	-	Y	G	Y	H	H	H	Y	G	H	G
AX-183590447	I	49.04	Chr2	158461718	5.65e-26	chr2LG1	114788328			G	-	H	G	G	H	H	H	G	-	G	-	Y	H	H	H	H	-	G	G	Y	-	G	-	G	H	H	Y	H	Y	Y	G	Y	H	H	H	Y	G	H	G
AX-183860609	I	49.04	Chr2	158459030	1.22e-27	chr2LG1	114791016			G	H	H	G	G	H	H	H	G	H	G	Y	Y	H	H	H	H	G	G	G	Y	H	G	G	G	H	-	Y	H	Y	Y	G	Y	H	H	H	Y	G	H	G
AX-183590448	I	49.04	Chr2	158458199	1.22e-27	chr2LG1	114791854			G	H	H	G	G	H	H	H	G	H	G	Y	Y	H	H	H	H	H	-	G	-	H	H	H	G	H	G	Y	H	H	Y	-	Y	H	H	H	Y	G	H	G
AX-183581122	I	49.04	Chr2	158851299	1.22e-27	chr2LG1	113267407			G	H	H	G	G	H	H	H	G	H	G	Y	Y	H	H	H	H	G	G	G	H	H	G	G	G	H	G	Y	H	Y	Y	G	Y	H	H	H	Y	G	H	G
AX-183576092	I	49.29	Chr2	158852226	1.22e-27	chr2LG1	113268334			G	-	-	G	G	G	H	H	G	H	G	-	H	H	H	H	H	G	G	G	Y	H	G	G	G	H	G	Y	H	Y	Y	G	H	H	H	H	Y	G	H	G
AX-183883385	I	49.79	Chr2	159518161	1.22e-27	chr2LG1	115717362			G	Y	H	G	G	H	H	H	G	H	G	Y	Y	H	H	H	H	G	G	G	Y	H	G	G	G	H	H	Y	H	Y	Y	G	Y	H	H	H	Y	G	H	G
AX-183870730	I	49.79	Chr2	159520145	1.57e-26	chr2LG1	115715166			G	H	H	G	G	H	H	H	G	H	G	Y	Y	H	H	H	H	-	G	G	H	H	G	G	G	H	-	Y	H	Y	Y	G	-	H	H	H	Y	G	H	G
AX-183872224	I	49.91	Chr2	159569295	5.65e-26	chr2LG1	115688114			G	H	H	-	G	H	H	H	G	H	G	Y	-	H	H	H	H	G	G	G	Y	H	G	G	G	H	H	Y	H	Y	Y	G	Y	H	H	H	Y	G	H	G
AX-183590469	I	49.91	Chr2	159571267	1.22e-22	chr2LG1	115670904			G	H	H	G	G	H	H	H	G	H	G	Y	Y	H	H	H	H	-	H	G	H	H	G	G	-	H	-	Y	H	Y	Y	G	Y	H	H	H	Y	G	H	G
AX-183564392	I	49.91	Chr2	159647759	1.22e-27	chr2LG1	115864036			G	H	H	G	G	H	H	H	G	H	G	Y	Y	H	H	H	H	G	G	G	Y	H	G	G	G	H	-	Y	H	Y	Y	G	Y	H	H	H	Y	G	H	G
AX-183864177	I	49.91	Chr2	159650635	5.65e-26	chr2LG1	115866927			G	H	H	G	G	H	H	H	G	H	G	Y	Y	H	H	H	H	G	G	-	-	H	G	H	G	H	H	Y	H	-	Y	G	Y	H	H	H	Y	G	H	G
AX-183570657	I	49.91	Chr2	159651294	2.61e-29	chr2LG1	115867610			G	H	H	G	G	H	H	H	G	H	G	Y	Y	H	H	H	H	-	G	G	H	H	G	G	G	H	H	Y	H	Y	Y	G	Y	H	H	H	Y	G	H	G
AX-183570656	I	49.91	Chr2	159874337	1.22e-27	chr2LG1	114560286			G	H	H	G	G	H	H	H	G	H	G	Y	Y	H	H	H	H	G	G	G	Y	H	G	G	G	H	H	Y	H	Y	Y	G	Y	H	H	H	Y	G	H	G
AX-183573718	I	50.29	Chr2	160211416	1.22e-27	scaffold00073	32245			G	H	H	G	G	H	H	H	G	H	G	Y	H	H	H	H	H	G	G	G	H	H	G	G	G	H	-	Y	H	Y	Y	G	-	H	H	H	Y	G	H	G
AX-183590495	I	50.29	Chr2	161195170	2.61e-29	chr2LG1	117791434			G	H	H	G	G	H	H	H	G	H	G	Y	H	H	H	H	H	G	G	G	H	H	G	-	G	H	-	Y	H	Y	Y	G	Y	H	H	H	Y	G	H	G
AX-183564396	I	50.29	Chr2	161195258	2.61e-29	chr2LG1	117791522			G	H	H	G	G	H	H	H	G	H	G	Y	H	H	H	H	H	G	G	G	H	H	G	-	G	H	H	Y	H	Y	Y	G	Y	H	H	H	Y	G	H	G
AX-183863899	I	50.29	Chr2	161213504	1.22e-27	chr2LG1	117809781			G	H	H	G	G	H	H	H	G	H	G	Y	H	H	H	H	H	G	G	G	H	H	G	G	G	H	G	Y	H	Y	Y	G	Y	H	H	H	Y	G	H	G
AX-183581125	I	50.29	Chr2	161778254	1.22e-27	chr2LG1	117312466			G	H	H	G	G	H	H	H	G	H	G	Y	H	H	H	H	H	G	G	G	-	H	G	G	G	H	H	Y	H	Y	Y	G	-	H	H	H	Y	G	H	G
AX-183576102	I	50.54	Chr2	162111900	1.22e-27	chr2LG1	123471158			G	H	H	G	G	H	H	H	G	H	G	Y	H	H	H	H	H	G	G	G	-	H	G	-	G	H	H	Y	H	Y	Y	G	Y	H	H	H	-	G	H	G
AX-183573717	I	50.54	Chr2	162260420	2.61e-29	chr2LG1	118733129			G	H	H	G	G	H	H	H	G	H	G	Y	H	H	H	H	H	G	G	G	Y	H	G	H	G	H	H	Y	H	Y	Y	G	H	H	H	H	H	G	H	G
AX-183881131	I	50.66	Chr2	162499926	2.61e-29	chr2LG1	119088373			G	H	H	G	G	H	H	H	G	H	G	Y	H	H	H	H	H	G	G	G	Y	H	G	G	G	H	H	Y	H	-	Y	G	Y	H	H	H	H	G	H	G
AX-183564399	I	50.66	Chr2	162500007	2.61e-29	chr2LG1	119088292			G	H	H	G	G	H	H	H	G	H	G	Y	H	H	H	H	H	-	G	G	-	H	G	G	G	H	H	Y	H	Y	Y	G	Y	H	H	H	H	G	H	G
AX-183877484	I	50.66	Chr2	162500523	2.61e-29	chr2LG1	119087426			G	H	H	G	G	H	H	H	G	H	G	Y	H	H	H	H	H	G	G	G	-	H	G	G	G	H	-	Y	H	-	Y	G	-	H	H	H	H	G	H	G
AX-183564398	I	50.66	Chr2	162993802	1.22e-27	chr2LG1	118924922			G	H	H	G	G	H	H	H	G	H	G	Y	H	H	H	H	H	G	G	G	Y	H	G	G	G	H	H	Y	H	Y	Y	G	Y	H	H	H	H	G	H	G
AX-183590511	I	50.78	Chr2	162995065	1.22e-27	chr2LG1	118923658			G	H	H	G	G	H	H	H	G	H	G	Y	H	H	H	H	H	G	G	G	-	H	G	G	G	H	G	Y	H	Y	Y	G	-	H	H	H	H	G	H	G
AX-183590491	I	50.91	Chr2	163875381	1.22e-27	chr2LG1	116651783			G	H	H	G	G	H	H	H	G	H	G	Y	H	H	H	H	H	G	G	G	H	H	G	G	G	H	G	Y	H	Y	Y	G	Y	H	H	H	H	G	H	G
AX-183564395	I	51.03	Chr2	164205244	1.22e-27	chr2LG1	116887901			G	H	H	G	G	H	H	H	G	H	G	Y	H	H	H	H	H	G	G	G	-	H	G	G	G	H	H	Y	H	Y	Y	G	Y	H	H	H	H	G	H	G
AX-183862515	I	51.28	Chr2	164700256	1.22e-27	chr2LG1	119617943			G	H	H	G	G	H	H	H	G	H	G	Y	H	H	H	H	H	G	G	G	Y	H	G	G	G	H	H	Y	Y	Y	Y	G	Y	H	H	H	H	G	H	G
AX-183868484	I	51.53	Chr2	167988003	1.22e-27	chr2LG1	121978085			G	H	H	G	G	H	H	H	G	H	G	Y	H	H	H	H	H	G	G	G	Y	H	G	H	G	H	H	Y	Y	Y	Y	G	Y	H	H	H	H	G	H	-
AX-183590529	I	51.65	Chr2	167991131	2.63e-24	chr2LG1	121957825			G	H	H	G	G	H	H	H	G	H	G	Y	H	H	H	H	H	-	G	G	H	H	G	G	G	H	G	Y	Y	Y	Y	G	Y	H	H	H	H	G	H	G
AX-183880063	I	51.77	Chr2	168336679	2.61e-29	chr2LG1	119548718			G	H	H	G	G	H	H	H	G	H	G	Y	H	G	H	H	H	G	G	G	H	H	G	G	G	H	H	Y	Y	Y	Y	G	H	H	H	H	H	G	H	G
AX-183570659	I	51.77	Chr2	168337798	2.61e-29	chr2LG1	119549837			G	H	H	G	G	H	H	H	G	H	G	Y	H	H	H	H	H	G	G	G	H	H	G	G	G	H	H	Y	Y	H	Y	G	H	H	H	H	H	G	H	G
AX-183576120	I	51.77	Chr2	168596794	1.22e-27	chr2LG1	130815118			G	H	H	G	G	H	H	G	G	H	G	Y	H	H	H	H	-	G	G	G	H	-	G	-	G	H	G	Y	Y	Y	Y	G	-	H	H	H	H	G	H	G
AX-183590527	I	51.77	Chr2	173148920	1.22e-27	scaffold04596	46994			G	H	H	G	G	H	H	H	G	H	G	Y	H	H	H	H	H	G	G	G	H	H	G	G	G	H	H	H	Y	-	Y	G	H	H	H	H	H	G	H	G
AX-183576105	I	51.77	Chr2	174246338	1.22e-27	chr2LG1	125726009			G	H	H	G	G	H	H	H	G	H	G	Y	H	H	H	H	H	G	G	G	Y	H	G	G	G	H	H	Y	Y	Y	Y	G	Y	H	H	H	H	G	H	G
AX-183863263	I	52.02	Chr2	174642015	5.65e-26	chr2LG1	124035094			G	H	H	G	G	H	H	H	G	H	G	Y	H	H	H	H	H	G	G	G	H	H	G	G	G	H	H	Y	Y	Y	Y	G	H	H	H	H	H	G	H	G
AX-183570666	I	52.02	Chr2	174754982	1.22e-27	chr2LG1	126421909			G	H	H	G	G	H	H	H	G	H	G	Y	H	H	H	H	H	G	G	G	Y	H	G	G	G	H	G	Y	Y	Y	Y	G	Y	H	H	H	H	-	H	G
AX-183564406	I	52.15	Chr2	176520338	1.22e-27	chr2LG1	126705953			G	H	H	G	G	H	H	H	G	H	G	Y	H	H	H	H	H	G	G	G	Y	H	G	G	G	H	H	Y	Y	-	Y	G	Y	H	H	H	H	G	H	G
AX-183590544	I	52.27	Chr2	176951790	5.65e-26	chr2LG1	127440137			G	H	H	G	G	H	H	H	G	H	G	Y	H	H	H	H	H	G	G	G	H	H	G	G	G	H	H	Y	Y	Y	Y	G	Y	H	H	H	H	G	H	G
AX-183581127	I	52.27	Chr2	177107030	1.22e-27	chr2LG1	127301990			G	H	H	G	G	H	H	H	G	H	G	Y	H	H	H	H	H	G	G	G	H	H	G	G	G	H	G	Y	Y	Y	Y	G	Y	H	H	H	H	G	H	G
AX-183570668	I	52.27	Chr2	177108268	5.65e-26	chr2LG1	127303228			G	H	H	G	G	H	H	H	G	H	G	Y	H	H	H	H	H	G	G	G	Y	H	G	G	G	H	G	Y	Y	Y	Y	G	H	H	H	H	H	G	H	G
AX-183564415	I	52.27	Chr2	177108588	1.22e-27	chr2LG1	127303548			G	H	H	G	G	H	H	H	G	H	G	Y	H	H	H	H	H	G	G	G	-	H	G	-	G	H	H	Y	Y	-	Y	G	-	H	H	H	H	G	H	G
AX-183894598	I	52.27	Chr2	177145115	2.61e-29	chr2LG1	127339694			G	H	H	G	G	H	H	H	G	H	G	Y	H	H	H	H	H	G	G	G	Y	H	G	G	G	H	G	Y	Y	Y	Y	G	Y	H	H	H	H	G	H	G
AX-183564412	I	52.39	Chr2	177547376	2.61e-29	chr2LG1	128958131			G	H	H	G	G	H	H	H	G	H	G	Y	H	H	H	H	H	G	G	G	H	H	G	-	G	H	G	Y	Y	Y	Y	G	H	H	H	H	H	G	H	G
AX-183564413	I	52.39	Chr2	177616942	1.22e-27	chr2LG1	129043519			G	H	H	G	G	H	H	H	G	H	G	Y	H	H	H	H	H	G	G	G	H	H	G	G	G	H	G	Y	Y	Y	Y	G	Y	H	H	H	H	G	H	G
AX-183882301	I	52.39	Chr2	177618652	1.22e-27	chr2LG1	129045223			G	H	H	G	G	H	H	H	G	H	G	Y	H	H	H	H	H	G	G	G	-	H	G	G	G	H	G	Y	Y	-	Y	G	-	H	H	H	H	G	H	G
AX-183590552	I	52.39	Chr2	177620703	1.22e-27	chr2LG1	129047264			G	H	H	G	G	H	H	H	G	H	G	Y	H	H	H	H	H	G	G	G	Y	H	G	H	G	H	G	Y	Y	-	Y	G	H	H	H	H	H	G	H	G
AX-183581128	I	52.64	Chr2	178060417	1.22e-27	chr2LG1	129888650			G	H	H	G	G	H	H	H	G	H	G	Y	H	H	H	H	H	G	G	G	Y	H	G	-	G	H	H	Y	Y	-	Y	G	-	H	H	H	H	G	H	G
AX-183564417	I	52.64	Chr2	178061015	2.61e-29	chr2LG1	129889249			G	H	H	G	G	H	H	H	G	H	G	Y	H	H	H	H	H	G	G	G	Y	H	G	G	G	H	H	Y	Y	Y	Y	G	Y	H	H	H	H	G	H	G
AX-183861857	I	52.64	Chr2	179046242	5.73e-16	chr2LG1	131049584			G	H	H	G	G	H	H	H	G	H	G	Y	H	H	H	H	H	G	G	G	-	H	G	G	G	H	H	Y	Y	-	Y	G	Y	H	H	H	H	G	H	G
AX-183581129	I	52.64	Chr2	179055297	2.61e-29	chr2LG1	131049787			G	H	H	G	G	H	H	H	G	H	G	Y	H	H	H	H	H	G	G	G	H	H	G	G	G	H	G	Y	Y	Y	Y	G	Y	H	H	H	H	G	H	G
AX-183576116	I	52.64	Chr2	179055480	2.61e-29	chr2LG1	131049970			G	H	H	G	G	H	H	H	G	H	G	Y	H	H	H	H	H	-	G	G	H	H	G	-	G	H	-	Y	Y	-	Y	G	Y	H	H	H	H	G	H	G
AX-183590570	I	52.89	Chr2	182238000	1.22e-27	chr2LG1	134006211			G	H	-	G	G	H	H	H	G	H	G	Y	-	H	H	H	H	G	G	G	Y	H	H	G	G	H	-	Y	Y	Y	Y	G	-	H	H	H	H	G	H	G
AX-183564419	I	53.01	Chr2	182510776	2.61e-29	chr2LG1	128939951			G	H	H	G	G	H	H	H	G	H	G	Y	H	H	H	H	H	G	G	G	-	H	G	G	G	H	G	Y	Y	-	Y	G	-	H	H	H	H	G	H	G
AX-183865049	I	53.14	Chr2	184712220	2.61e-29	chr2LG1	138977282			G	H	H	G	G	H	H	H	G	H	G	Y	H	H	H	H	H	-	G	G	-	H	G	G	G	H	H	Y	Y	Y	Y	G	Y	H	H	H	H	G	H	G
AX-183564424	I	53.14	Chr2	185135876	1.22e-27	chr2LG1	141350049			G	H	H	G	G	H	H	H	G	H	G	Y	H	H	H	H	H	-	G	G	H	H	G	-	G	H	-	Y	Y	Y	Y	G	-	H	H	H	H	G	H	G
AX-183576118	I	53.39	Chr2	188790186	2.61e-29	chr2LG1	139158582			G	H	H	G	G	H	H	H	G	H	G	Y	H	H	H	H	H	G	G	G	Y	Y	G	G	G	H	G	Y	Y	Y	Y	G	H	H	H	H	H	G	H	G
AX-183590567	I	53.51	Chr2	189435551	1.22e-27	chr2LG1	142190945			G	H	H	G	G	H	H	H	G	H	G	Y	H	H	H	H	H	G	G	G	H	Y	-	-	G	H	G	Y	Y	Y	Y	G	-	H	H	H	H	G	H	G
AX-183576122	I	53.51	Chr2	189542214	2.61e-29	chr2LG1	142298306			G	H	H	G	G	H	H	H	G	H	G	Y	H	H	H	H	H	-	G	G	-	Y	G	-	G	H	-	Y	Y	Y	Y	G	Y	H	H	H	H	G	H	G
AX-183576129	I	53.76	Chr2	190408115	2.61e-29	chr2LG1	144883203			G	H	H	G	G	H	H	H	G	H	G	Y	H	H	H	H	H	G	G	G	-	Y	G	G	G	H	G	Y	Y	Y	Y	G	H	H	H	H	H	G	H	G
AX-183564432	I	53.76	Chr2	190737513	2.61e-29	chr2LG1	143516769			G	H	H	G	G	H	H	H	G	H	G	Y	H	H	H	H	H	G	G	G	Y	Y	G	G	G	H	H	Y	Y	Y	Y	G	Y	H	H	H	H	G	H	G
AX-183576132	I	53.76	Chr2	191300751	2.61e-29	chr2LG1	143877162			G	H	H	G	G	H	H	H	G	H	G	Y	H	H	H	H	H	G	G	G	Y	Y	G	G	G	H	G	Y	Y	Y	Y	G	-	H	H	H	H	G	H	G
AX-183590609	I	53.76	Chr2	191639255	1.22e-27	chr2LG1	144231741			G	H	H	G	G	H	H	H	G	H	G	Y	H	H	H	H	H	G	G	G	-	Y	G	G	G	H	G	Y	Y	Y	Y	G	-	H	H	H	H	G	H	G
AX-183570679	I	53.76	Chr2	192773201	2.61e-29	super-scaffold2010	502582			G	H	H	G	G	H	H	H	G	H	G	Y	H	H	H	H	H	-	G	G	Y	Y	G	G	G	H	H	Y	Y	Y	Y	G	Y	H	H	H	H	G	H	G
AX-183572624	I	53.88	Chr2	198045925	1.22e-27	chr2LG1	145767988			G	H	H	G	G	H	H	H	G	H	G	Y	H	H	H	H	H	-	G	G	-	Y	G	G	G	H	-	Y	Y	-	Y	G	Y	H	H	H	H	G	H	G
AX-183564436	I	53.88	Chr2	198046929	1.22e-27	chr2LG1	145768992			G	H	H	G	G	H	H	H	G	H	G	Y	H	H	H	H	H	G	G	G	H	Y	G	G	G	H	G	Y	Y	H	Y	-	H	H	H	H	H	G	H	G
AX-183862043	I	53.88	Chr2	198197006	2.61e-29	chr2LG1	145916837			G	H	H	G	G	H	H	H	G	H	G	Y	H	H	H	H	H	G	G	G	H	Y	G	G	G	H	H	Y	Y	Y	Y	G	-	H	H	H	H	G	H	G
AX-183574913	I	54.38	Chr2	204100853	1.22e-27	chr2LG1	196450244			G	Y	H	G	G	H	H	H	G	H	G	Y	H	H	H	H	H	-	G	G	H	Y	G	-	G	H	-	Y	Y	Y	Y	G	Y	H	H	H	H	G	H	G
AX-183564441	I	54.38	Chr2	204519964	2.61e-29	chr2LG1	149628492			G	Y	H	G	G	H	H	H	G	H	G	Y	H	H	H	H	H	G	G	G	-	Y	G	G	G	H	G	Y	Y	-	Y	G	-	H	H	H	H	G	H	G
AX-183564443	I	54.5	Chr2	204779394	1.22e-27	chr2LG1	157478990			G	Y	H	G	G	H	H	H	G	H	G	Y	H	H	H	H	H	G	G	G	H	Y	-	G	G	H	G	Y	Y	Y	Y	-	-	H	H	H	H	G	H	G
AX-183865151	I	54.5	Chr2	204915866	1.22e-27	chr2LG1	156143781			G	Y	H	G	G	H	H	H	G	H	G	Y	H	H	H	H	H	G	G	G	Y	Y	H	G	G	H	H	Y	Y	Y	Y	G	-	H	H	H	H	G	H	G
AX-183863951	I	54.5	Chr2	205163072	1.22e-27	chr2LG1	150303663			G	Y	H	G	G	H	H	Y	G	H	G	Y	H	H	H	-	H	-	G	G	-	Y	G	G	G	H	G	Y	Y	H	Y	G	Y	H	H	H	H	G	H	G
AX-183881711	I	54.5	Chr2	205172555	2.61e-29	chr2LG1	150313146			G	Y	H	G	G	H	H	H	G	H	G	Y	H	H	H	H	H	G	G	G	H	Y	G	G	G	H	-	Y	Y	-	Y	G	Y	H	H	H	H	G	H	G
AX-183576149	I	54.5	Chr2	209854968	1.22e-27	chr2LG1	172807073			G	Y	H	G	G	H	H	H	G	H	G	Y	H	H	H	H	H	G	G	G	-	Y	G	G	G	H	G	Y	Y	Y	Y	G	Y	H	H	H	H	G	H	G
AX-183564492	I	54.5	Chr2	224701870	2.61e-29	chr2LG1	323202305			G	Y	H	G	G	H	H	H	G	H	G	Y	H	H	H	H	H	G	G	G	Y	Y	G	G	G	H	H	Y	Y	Y	Y	G	Y	H	H	H	H	G	H	G
AX-183576150	I	54.5	Chr2	290648313	1.22e-27	chr2LG1	214507606			G	Y	H	G	G	H	H	H	G	H	G	Y	H	H	H	H	H	G	G	G	Y	Y	G	G	G	H	G	Y	Y	Y	Y	G	Y	H	H	H	H	G	H	G
AX-183580864	I	54.5	Chr2	290782961	2.61e-29	scaffold00629	335023			G	Y	H	G	G	H	H	H	G	H	G	Y	H	H	H	H	H	G	G	G	-	Y	G	G	G	H	H	Y	Y	Y	Y	G	Y	H	H	H	H	G	H	G
AX-183564447	I	54.5	Chr2	291542266	1.22e-27	chr2LG1	190441372			G	Y	H	G	G	H	H	H	G	H	G	Y	H	H	H	H	H	G	G	G	-	Y	G	G	G	H	H	Y	Y	-	Y	G	-	H	H	H	H	G	H	G
AX-183576361	I	54.5	Chr2	295724619	1.22e-27	chr2LG1	166472230			G	Y	H	G	G	H	H	G	G	H	G	Y	H	H	H	H	H	G	G	G	Y	Y	G	G	G	H	H	Y	Y	Y	Y	G	H	H	H	H	H	G	H	G
AX-183576145	I	54.5	Chr2	304805824	1.22e-27	chr2LG1	163266084			G	Y	H	G	G	H	H	H	G	H	G	Y	H	H	H	H	H	G	G	G	-	Y	G	G	G	H	G	Y	Y	Y	Y	G	-	H	H	H	H	G	H	G
AX-183581140	I	54.5	Chr2	307028745	1.22e-27	chr2LG1	161173485			G	Y	H	G	G	H	H	H	G	H	G	Y	H	H	H	H	H	G	G	G	Y	Y	G	G	G	H	H	Y	Y	-	Y	G	Y	H	H	H	H	G	H	G
AX-183891237	I	54.5	Chr2	307946460	1.22e-27	chr2LG1	194234250			G	Y	H	G	G	H	H	H	G	H	G	Y	H	H	H	H	H	G	G	G	Y	Y	G	G	G	H	H	Y	Y	Y	Y	G	Y	H	H	H	H	G	H	G
AX-183576220	I	54.5	Chr2	307875511	1.22e-27	chr2LG1	180259282			G	Y	H	G	G	H	H	H	G	H	G	Y	H	H	H	H	H	G	G	G	Y	Y	G	G	G	H	H	Y	Y	Y	Y	G	Y	H	H	H	H	G	H	G
AX-183591028	I	54.5	Chr2	309512157	1.22e-27	chr2LG1	178687222			G	-	H	G	G	H	H	H	G	H	G	Y	H	H	H	H	H	-	G	G	Y	Y	G	G	G	H	H	Y	Y	Y	Y	G	Y	H	H	H	H	G	H	G
AX-183865939	I	54.5	Chr2	310220607	5.65e-26	chr2LG1	177904439			G	Y	H	G	G	H	H	H	G	H	G	Y	H	H	H	H	H	G	G	G	Y	Y	G	G	G	H	H	Y	Y	Y	Y	G	-	H	H	H	H	G	H	G
AX-183576219	I	54.63	Chr2	310222558	1.22e-27	chr2LG1	177902470			G	Y	H	G	G	H	H	H	G	H	G	Y	H	H	H	H	H	G	G	G	H	Y	G	G	G	H	G	Y	Y	Y	Y	G	Y	H	H	H	H	G	H	G
AX-183591019	I	54.63	Chr2	310295351	5.65e-26	chr2LG1	177896780			G	Y	H	G	G	H	H	H	G	H	G	Y	H	H	H	H	H	G	G	G	H	Y	G	G	G	H	-	Y	Y	Y	Y	G	H	H	H	H	H	G	H	G
AX-183590935	I	54.63	Chr2	312010213	2.61e-29	chr2LG1	233680838			G	Y	H	G	G	H	H	H	G	H	G	Y	H	H	H	H	H	G	G	G	-	Y	G	-	G	H	-	Y	Y	-	Y	G	Y	H	H	H	H	G	H	G
AX-183590926	I	54.63	Chr2	312645278	1.22e-27	chr2LG1	233017655			G	Y	H	G	G	H	H	H	G	H	G	Y	H	H	H	H	H	G	G	G	-	Y	G	G	G	H	G	Y	Y	Y	Y	G	-	H	H	H	H	G	H	G
AX-183564522	I	54.63	Chr2	312870262	1.22e-27	chr2LG1	232796123			G	Y	H	G	G	H	H	H	G	H	G	Y	H	H	H	H	H	G	G	G	Y	Y	G	-	G	H	H	Y	Y	Y	Y	G	Y	H	H	H	H	G	H	G
AX-183590743	I	55	Chr2	313690425	1.22e-27	chr2LG1	270549832			G	Y	H	G	G	H	H	H	G	H	G	H	H	H	H	H	H	G	G	G	-	Y	G	G	G	H	G	Y	Y	H	Y	G	H	H	H	H	H	G	H	G
AX-183576156	I	55	Chr2	313967886	1.22e-27	chr2LG1	270820657			G	Y	H	G	G	H	H	H	G	H	G	H	H	H	H	H	H	G	G	G	-	Y	G	G	G	H	H	Y	Y	-	Y	G	H	H	H	H	H	G	H	G
AX-183564737	I	55.12	Chr2	314529799	1.22e-27	chr2LG1	276511172			G	Y	H	G	G	H	H	H	G	H	G	H	H	H	H	H	H	G	G	G	Y	Y	G	G	G	H	H	Y	Y	H	Y	G	Y	H	H	H	H	G	H	G
AX-183576379	I	55.12	Chr2	315696831	2.61e-29	chr2LG1	272731747			G	Y	H	G	G	H	H	H	G	H	G	H	H	H	H	H	H	G	G	G	Y	Y	G	G	G	H	H	Y	Y	Y	Y	G	Y	H	H	H	H	G	H	G
AX-183564725	I	55.12	Chr2	316385441	1.22e-27	chr2LG1	269548375			G	Y	H	G	G	H	H	H	G	H	G	H	H	H	H	H	H	G	G	G	Y	Y	G	G	G	H	H	Y	Y	Y	Y	G	Y	H	H	H	H	G	H	G
AX-183564724	I	55.37	Chr2	319381077	1.22e-27	chr2LG1	273044929			G	Y	H	G	G	H	H	H	G	H	G	H	H	H	H	H	H	G	G	G	-	Y	G	G	G	H	G	Y	Y	Y	Y	G	Y	H	H	H	H	G	H	G
AX-183564729	I	55.5	Chr2	319592267	1.22e-27	chr2LG1	278863742			G	Y	H	G	G	H	H	H	G	H	G	H	H	H	H	H	H	G	G	G	H	Y	G	G	G	H	G	Y	Y	-	Y	G	Y	H	H	H	H	G	H	H
AX-183592012	I	55.5	Chr2	319852837	1.22e-27	chr2LG1	275051626			G	Y	H	G	G	H	H	H	G	H	G	H	H	H	H	H	H	G	G	G	H	Y	G	G	G	H	G	Y	Y	Y	Y	G	-	H	H	H	H	G	H	H
AX-183576375	I	55.62	Chr2	320602243	2.61e-29	chr2LG1	274564006			G	Y	H	G	G	H	H	H	G	H	G	H	H	H	H	H	H	G	G	G	-	Y	G	G	G	H	G	Y	Y	Y	Y	G	Y	H	H	H	H	G	H	H
AX-183564733	I	55.62	Chr2	320810510	2.61e-29	chr2LG1	276016248			G	Y	H	G	G	H	H	H	G	H	G	H	H	H	H	H	H	G	G	G	-	Y	G	G	G	H	H	Y	Y	Y	Y	G	Y	H	H	H	H	G	H	H
AX-183871949	I	55.62	Chr2	321217649	5.65e-26	chr2LG1	273955461			G	Y	H	G	G	H	H	H	G	H	-	H	H	H	H	H	H	G	H	G	Y	Y	G	H	G	H	-	Y	Y	Y	Y	G	-	H	H	H	H	G	H	H
AX-183590754	I	55.62	Chr2	321232235	2.61e-29	chr2LG1	273945713			G	Y	H	G	G	H	H	H	G	H	G	H	H	H	H	H	H	G	G	G	Y	Y	G	G	G	H	H	Y	Y	Y	Y	G	Y	H	H	H	H	G	H	H
AX-183576159	I	55.62	Chr2	321357547	2.61e-29	chr2LG1	273907363			G	Y	H	G	G	H	H	H	G	H	G	H	H	H	H	H	H	G	G	G	Y	Y	G	G	G	H	H	Y	Y	Y	Y	G	-	H	H	H	H	G	H	H
AX-183862228	I	55.62	Chr2	321357838	2.61e-29	chr2LG1	273907073			G	Y	H	G	G	H	H	H	G	H	G	H	H	H	H	H	H	G	G	G	Y	Y	G	-	G	H	H	Y	Y	Y	Y	G	Y	H	H	H	H	G	H	H
AX-183892464	I	55.74	Chr2	321449072	2.63e-24	chr2LG1	273251268			G	Y	H	G	G	H	H	H	G	H	G	H	H	H	H	H	H	G	G	G	Y	Y	G	G	G	H	-	Y	Y	Y	Y	G	Y	H	H	H	H	G	H	H
AX-183861416	I	55.74	Chr2	321517135	5.65e-26	chr2LG1	273449754			G	Y	H	G	G	H	H	H	G	H	G	H	H	H	H	H	H	G	G	G	Y	Y	G	G	G	H	H	Y	Y	Y	Y	G	Y	H	H	H	H	G	H	H
AX-183860496	I	55.74	Chr2	321517706	1.22e-27	chr2LG1	273450325			G	Y	H	G	G	H	H	H	G	H	G	H	H	H	H	H	H	G	G	G	Y	Y	G	G	G	H	H	Y	Y	Y	Y	G	Y	H	H	H	H	G	H	H
AX-183573317	I	55.74	Chr2	321756041	1.22e-27	chr2LG1	274744146			G	Y	H	G	G	H	H	H	G	H	G	H	H	H	H	H	H	G	G	G	H	Y	G	-	G	H	-	Y	Y	Y	Y	G	Y	H	H	H	H	G	H	H
AX-183564732	I	55.74	Chr2	321756082	1.22e-27	chr2LG1	274744105			G	Y	H	G	G	H	H	H	G	H	G	H	H	H	H	H	H	G	G	G	Y	Y	G	G	G	H	G	Y	Y	Y	Y	G	H	H	H	H	H	G	H	H
AX-183582423	I	56.24	Chr2	322184262	1.22e-27	scaffold03792	89212			G	Y	H	G	G	H	H	H	G	H	G	H	H	H	H	H	H	G	G	G	-	Y	G	G	G	H	H	Y	Y	-	Y	G	-	H	H	H	H	G	H	H
AX-183564468	I	56.49	Chr2	326696362	2.61e-29	chr2LG1	279458878			G	Y	H	G	G	H	H	H	G	H	G	H	H	H	H	H	H	G	G	G	H	Y	G	-	G	H	H	Y	Y	Y	Y	G	Y	H	H	H	H	G	H	H
AX-183573723	I	56.49	Chr2	326976417	1.22e-27	chr2LG1	279187235			G	Y	H	G	G	H	H	H	G	H	G	H	H	H	H	H	H	G	G	G	Y	Y	G	G	G	H	G	Y	Y	Y	Y	G	Y	H	H	H	H	G	H	H
AX-183576382	I	56.49	Chr2	326993958	2.61e-29	chr2LG1	282212026			G	Y	H	G	G	H	H	H	G	H	G	H	H	H	H	H	H	G	G	G	Y	Y	G	G	G	H	-	Y	Y	Y	Y	G	H	H	H	H	H	G	H	H
AX-183564739	I	56.61	Chr2	328072380	1.22e-27	chr2LG1	286287991			G	Y	H	G	G	H	H	-	G	H	G	H	H	H	H	H	H	G	G	G	Y	Y	G	H	G	H	G	Y	Y	Y	Y	G	Y	H	H	H	H	G	H	H
AX-183564742	I	56.74	Chr2	330600992	1.22e-27	chr2LG1	285852719			G	Y	H	G	G	H	H	H	G	H	G	H	H	H	H	H	H	G	G	G	Y	Y	G	G	G	H	H	Y	Y	Y	Y	G	Y	H	H	H	H	G	H	H
AX-183564470	I	56.74	Chr2	331025645	1.22e-27	chr2LG1	285522204			G	Y	H	G	G	-	H	H	G	H	G	-	-	H	H	H	H	G	G	G	-	Y	G	H	G	H	H	Y	Y	H	Y	H	Y	H	H	H	H	G	H	H
AX-183576387	I	56.74	Chr2	332407834	2.61e-29	chr2LG1	288919365			G	Y	H	G	G	H	H	H	G	H	G	H	H	H	H	H	H	G	G	G	Y	Y	G	-	G	H	G	Y	Y	Y	Y	G	-	H	H	H	H	G	H	H
AX-183573727	I	56.74	Chr2	332524111	1.22e-27	chr2LG1	286871627			G	Y	H	G	G	H	H	H	G	H	G	H	H	H	H	H	H	G	G	G	-	Y	G	G	G	H	G	Y	Y	Y	Y	G	Y	H	H	H	H	G	H	H
AX-183590776	I	56.74	Chr2	332586830	1.22e-27	chr2LG1	286796199			G	Y	H	G	G	H	H	H	G	H	G	H	H	H	H	H	H	G	G	G	Y	Y	G	H	G	H	H	Y	Y	H	Y	G	Y	H	H	H	H	G	H	H
AX-183590775	I	56.74	Chr2	332587759	2.61e-29	chr2LG1	286794917			G	Y	H	G	G	H	H	H	G	H	G	H	H	H	H	H	H	G	G	G	Y	Y	G	G	G	H	H	Y	Y	Y	Y	G	Y	H	H	H	H	G	H	H
AX-183573418	I	56.99	Chr2	334903950	1.22e-27	chr3LG5	55284479			G	Y	H	G	G	H	H	H	G	H	G	H	H	H	H	H	H	G	G	G	H	Y	G	G	G	H	-	Y	Y	Y	Y	G	Y	H	H	H	H	G	H	H
AX-183860798	I	57.23	Chr2	337244140	2.61e-29	chr2LG1	291816147			G	Y	H	G	G	H	H	H	G	H	G	H	H	H	H	H	H	G	G	G	H	Y	G	G	G	H	G	Y	Y	Y	Y	G	Y	H	H	H	H	G	H	H
AX-183863654	I	57.36	Chr2	337992183	5.65e-26	chr2LG1	292213025			G	Y	H	G	G	H	H	H	G	H	G	H	Y	H	H	H	H	G	G	G	-	Y	G	G	G	H	G	Y	Y	Y	Y	G	-	H	H	H	H	G	H	H
AX-183573239	I	58.11	Chr2	340908635	5.65e-26	chr2LG1	295062073			G	Y	H	G	G	H	H	H	G	H	G	H	Y	H	Y	H	H	G	G	G	Y	Y	G	G	G	H	H	Y	Y	Y	Y	G	Y	H	H	H	H	G	H	H
AX-183564475	I	58.11	Chr2	341131370	2.61e-29	chr2LG1	293190099			G	-	H	G	G	H	H	H	G	H	G	H	Y	H	Y	H	H	G	G	G	Y	Y	G	G	G	H	G	Y	Y	Y	Y	G	Y	H	H	H	H	G	H	H
AX-183564748	I	58.11	Chr2	341434300	2.61e-29	chr2LG1	296393540			G	Y	H	G	G	H	H	H	G	H	G	H	-	H	Y	H	H	G	G	G	H	Y	G	G	G	H	G	Y	Y	-	Y	G	-	H	H	H	H	G	H	H
AX-183576172	I	58.23	Chr2	341744934	1.22e-27	chr2LG1	293798304			G	Y	H	G	G	H	H	H	G	H	G	H	Y	H	Y	H	H	G	G	G	-	Y	G	G	G	H	G	Y	Y	Y	Y	G	Y	H	H	H	H	G	H	H
AX-183590804	I	58.23	Chr2	341745492	2.61e-29	chr2LG1	293797750			G	Y	H	H	G	H	H	H	G	H	G	H	Y	H	Y	H	H	G	G	-	-	Y	G	G	G	H	G	Y	Y	Y	Y	G	H	H	H	H	H	G	H	H
AX-183590796	I	58.35	Chr2	341906197	5.65e-26	chr2LG1	293740258			G	Y	H	G	G	H	H	H	G	H	G	H	Y	H	Y	H	H	G	G	G	-	Y	G	G	G	H	H	Y	Y	Y	Y	G	Y	H	H	H	H	G	H	H
AX-183876074	I	58.35	Chr2	343774449	1.22e-27	chr2LG1	298661787			G	Y	H	G	G	H	H	H	G	H	G	H	Y	H	Y	H	H	G	G	G	Y	Y	G	G	G	H	H	Y	Y	-	Y	G	-	H	H	H	H	G	H	H
AX-183865999	I	58.6	Chr2	344441724	1.22e-27	chr2LG1	299666780			G	Y	H	G	G	H	H	H	G	H	G	H	Y	H	Y	H	H	G	G	G	H	Y	G	G	G	H	G	Y	Y	Y	Y	G	Y	H	H	H	H	G	H	H
AX-183870523	I	58.6	Chr2	346022410	1.22e-27	chr2LG1	296615147			G	Y	H	G	G	H	H	H	G	H	G	H	Y	H	Y	H	H	G	H	G	Y	Y	G	H	G	H	-	Y	Y	Y	Y	G	H	H	H	H	H	G	H	H
AX-183881149	I	58.6	Chr2	346022941	2.61e-29	chr2LG1	296614616			G	Y	H	G	G	H	H	H	G	H	G	H	Y	H	Y	H	H	H	G	G	Y	Y	G	G	G	H	-	Y	Y	Y	Y	G	Y	H	H	H	H	G	H	H
AX-183877045	I	58.73	Chr2	346908277	2.61e-29	chr2LG1	300134665			G	Y	H	G	G	H	H	H	G	H	G	H	Y	H	Y	H	H	G	G	G	H	Y	G	G	G	H	H	Y	Y	Y	Y	G	Y	H	H	H	H	G	H	H
AX-183866670	I	58.97	Chr2	347666514	2.61e-29	chr2LG1	303285053			G	Y	H	G	G	H	H	H	G	H	G	H	Y	H	Y	H	H	-	G	G	-	Y	G	-	G	H	H	Y	Y	Y	Y	G	-	H	H	H	H	G	H	H
AX-183873571	I	58.97	Chr2	347913400	1.22e-27	chr2LG1	303156072			G	Y	H	G	G	H	H	H	G	H	G	H	Y	H	Y	H	H	H	G	G	Y	Y	G	G	G	H	H	Y	Y	Y	Y	G	Y	H	-	H	H	G	H	H
AX-183564477	I	59.22	Chr2	348263329	1.22e-27	chr2LG1	302633897			G	Y	H	G	G	H	H	H	G	H	G	H	Y	H	Y	H	H	G	G	G	-	Y	G	G	G	H	G	Y	Y	Y	Y	G	H	H	H	H	H	G	H	H
AX-183564767	I	59.22	Chr2	348520947	1.22e-27	chr2LG1	301845835			G	Y	H	G	G	H	H	H	G	H	G	H	Y	H	Y	H	H	G	G	G	H	Y	G	G	G	H	G	Y	Y	Y	Y	G	-	H	H	H	H	G	H	H
AX-183576407	I	59.22	Chr2	348570997	2.61e-29	chr2LG1	301793421			G	Y	H	G	G	H	H	H	G	H	G	H	Y	H	Y	H	H	-	G	G	Y	Y	G	G	G	H	H	Y	Y	Y	Y	G	Y	H	H	H	H	G	H	H
AX-183564769	I	59.35	Chr2	349001500	1.22e-27	chr2LG1	302348134			G	Y	H	G	G	H	H	H	G	H	G	H	Y	H	Y	H	H	-	G	G	Y	Y	G	G	G	H	-	Y	Y	H	Y	G	Y	H	H	H	H	G	H	H
AX-183864840	I	59.72	Chr2	349772723	1.22e-27	chr2LG1	300556048			G	Y	H	G	G	H	H	H	G	H	G	H	Y	H	Y	H	H	-	G	G	Y	Y	G	G	G	H	-	Y	Y	Y	Y	G	-	H	H	H	H	G	H	Y
AX-183885546	I	59.84	Chr2	349807905	2.61e-29	chr2LG1	302560143			G	Y	H	G	G	H	H	H	G	H	G	H	Y	H	Y	H	H	G	G	G	Y	Y	G	G	G	H	H	Y	Y	Y	Y	G	Y	H	H	H	H	G	H	Y
AX-183576174	I	60.22	Chr2	349833032	1.22e-27	chr2LG1	302511753			G	Y	H	G	G	H	H	H	G	H	G	H	Y	H	Y	H	H	-	G	G	Y	Y	G	G	G	H	G	Y	Y	Y	Y	G	Y	H	H	H	H	G	H	Y
AX-183573732	I	61.34	Chr2	352613300	1.22e-27	chr2LG1	307590256			G	H	H	G	G	H	H	H	G	-	G	H	H	H	Y	H	H	G	G	G	H	Y	G	G	G	-	G	Y	Y	Y	Y	G	H	H	H	H	H	G	H	Y
AX-183592161	I	61.59	Chr2	355726512	2.61e-29	chr2LG1	310304781			G	Y	H	G	G	H	H	H	G	H	G	H	-	H	Y	H	H	G	G	G	H	Y	G	H	G	H	G	Y	Y	Y	Y	G	H	H	H	H	H	G	H	Y
AX-183576410	I	61.59	Chr2	355729240	2.61e-29	chr2LG1	310307292			G	Y	H	G	G	H	H	H	G	H	G	H	Y	H	Y	H	H	G	G	G	H	Y	H	G	G	H	G	Y	Y	Y	Y	G	H	H	H	H	H	G	H	Y
AX-183592163	I	61.84	Chr2	355745352	1.22e-27	chr2LG1	310323408			G	Y	H	G	G	H	H	H	G	H	G	H	Y	H	Y	H	H	-	G	G	Y	Y	G	G	G	H	G	Y	Y	Y	Y	G	Y	H	H	H	H	G	H	Y
AX-183573325	I	61.96	Chr2	356028764	1.22e-27	chr2LG1	308283013			G	Y	H	G	G	H	H	H	G	H	G	H	Y	H	Y	H	H	G	G	G	Y	Y	G	G	G	H	H	Y	Y	Y	Y	G	Y	H	H	H	H	G	H	Y
AX-183576203	I	62.09	Chr2	356474041	2.61e-29	chr2LG1	310842588			G	Y	H	G	G	H	H	H	G	H	G	H	Y	H	Y	H	H	G	G	G	H	Y	G	G	G	H	G	Y	Y	-	Y	G	Y	H	H	H	H	G	H	Y
AX-183864928	I	62.09	Chr2	356476636	1.22e-27	chr2LG1	310845183			G	Y	H	G	G	G	H	H	G	H	G	H	Y	H	Y	H	H	G	G	G	-	Y	G	G	G	H	H	Y	Y	Y	Y	G	H	H	H	H	H	G	H	Y
AX-183573327	I	62.21	Chr2	356886081	2.61e-29	scaffold01616	68265			G	Y	H	G	G	H	H	H	G	H	G	H	Y	H	Y	H	H	G	G	G	H	Y	G	G	G	H	G	Y	Y	Y	Y	G	Y	H	H	H	H	G	H	Y
AX-183863227	I	62.46	Chr2	357535903	1.22e-27	chr2LG1	311596668			G	Y	H	G	G	H	H	H	G	H	G	H	H	H	Y	H	H	G	G	G	-	Y	G	G	G	H	G	Y	Y	H	Y	G	-	H	H	H	H	G	H	Y
AX-183572520	I	62.46	Chr2	358444641	1.22e-27	scaffold01951	1563			H	-	H	H	H	H	H	H	G	H	G	H	Y	H	-	H	H	-	-	H	H	-	H	-	G	H	-	Y	Y	Y	Y	-	H	H	H	-	H	H	H	Y
AX-183866565	I	62.58	Chr2	358445259	5.65e-26	scaffold01951	2181			G	Y	H	G	G	H	H	H	G	H	G	H	Y	H	Y	H	H	G	G	G	H	Y	G	H	G	H	H	Y	Y	Y	Y	G	H	H	H	H	H	G	H	Y
AX-183873940	I	62.58	Chr2	358667927	2.61e-29	chr2LG1	313548811			G	Y	H	G	G	H	H	H	G	H	G	H	Y	H	Y	H	H	G	G	G	-	Y	G	G	G	H	H	Y	Y	Y	Y	G	-	H	H	H	H	G	H	Y
AX-183576175	I	62.58	Chr2	358772970	2.61e-29	chr2LG1	312233556			G	Y	H	G	G	H	H	H	G	H	G	H	Y	H	Y	H	H	G	G	G	Y	Y	G	G	G	H	H	Y	Y	Y	Y	G	-	H	H	H	H	G	H	Y
AX-183861361	I	62.58	Chr2	358773764	1.22e-27	chr2LG1	312232762			G	Y	H	G	G	H	H	H	G	H	G	H	Y	H	Y	H	H	G	G	G	H	Y	G	H	G	H	G	Y	Y	-	Y	G	Y	H	H	H	H	G	H	Y
AX-183861239	I	62.58	Chr2	358895445	1.22e-27	chr2LG1	312171850			G	Y	H	G	G	H	H	H	G	H	G	H	Y	H	Y	H	H	-	G	G	Y	Y	G	G	G	H	H	Y	Y	H	Y	G	Y	H	H	H	H	G	H	Y
AX-183576180	I	62.58	Chr2	359195824	2.61e-29	chr2LG1	313289675			G	Y	H	G	G	H	H	H	G	H	G	H	Y	H	Y	H	H	G	G	G	H	Y	G	G	G	H	-	Y	Y	Y	Y	G	Y	H	H	H	H	G	H	Y
AX-183865051	I	62.58	Chr2	359197783	1.22e-27	chr2LG1	313291593			G	Y	H	G	G	H	H	H	G	H	G	H	Y	H	Y	H	H	G	G	G	H	Y	-	G	G	H	H	Y	Y	-	H	G	H	H	-	H	H	G	H	Y
AX-183576182	I	62.58	Chr2	359288043	1.22e-27	chr2LG1	313353744			G	Y	H	G	G	H	H	H	G	H	G	H	Y	H	Y	H	H	G	G	G	Y	Y	G	G	G	H	H	Y	Y	Y	Y	G	Y	H	H	H	H	G	H	Y
AX-183576178	I	62.58	Chr2	359438857	1.22e-27	chr2LG1	313680258			G	Y	H	G	G	H	H	-	G	H	G	H	Y	H	Y	H	H	G	G	G	-	Y	G	G	G	H	G	Y	Y	Y	Y	G	-	H	-	G	H	G	H	Y
AX-183576179	I	62.58	Chr2	359506006	2.61e-29	chr2LG1	313718754			G	Y	H	G	G	H	H	H	G	H	G	H	Y	H	Y	H	H	G	G	G	-	Y	G	G	G	H	H	Y	Y	Y	Y	G	Y	H	H	H	H	G	H	Y
AX-183864253	I	62.71	Chr2	359510419	1.22e-27	chr2LG1	313723251			G	Y	H	G	G	H	H	H	G	H	G	H	Y	H	Y	H	H	-	G	G	Y	Y	G	G	G	H	H	Y	Y	Y	Y	G	H	H	H	H	H	G	H	Y
AX-183592175	I	63.45	Chr2	365198161	2.61e-29	chr2LG1	319414018			G	H	H	G	G	H	H	H	G	H	H	H	-	H	Y	H	H	G	G	G	H	Y	G	-	G	H	-	Y	Y	Y	Y	G	H	H	H	H	H	G	H	Y
AX-183570693	I	63.45	Chr2	365982668	1.22e-27	chr2LG1	333614679			G	H	H	G	G	H	H	H	G	H	H	H	Y	H	Y	H	H	G	G	G	H	Y	G	G	G	H	G	Y	Y	H	Y	G	Y	H	H	H	H	G	H	Y
AX-183862905	I	63.45	Chr2	365982735	1.22e-27	chr2LG1	333614612			G	-	H	G	G	H	H	G	G	-	H	H	-	H	-	H	H	G	G	G	-	Y	G	H	G	H	-	-	-	Y	-	G	-	H	H	H	H	G	H	-
AX-183592171	I	63.45	Chr2	366121612	1.22e-27	chr2LG1	321598222			G	H	H	G	G	H	H	H	G	H	H	H	Y	H	Y	H	H	G	G	G	H	Y	H	G	G	H	G	Y	Y	Y	Y	G	Y	H	H	H	H	G	H	Y
AX-183576413	I	63.58	Chr2	367815243	1.22e-27	chr2LG1	323913057			G	H	H	G	G	H	H	H	G	H	H	H	Y	H	Y	H	H	G	G	G	Y	Y	G	G	G	H	G	Y	Y	Y	Y	G	Y	H	H	H	H	G	H	Y
AX-183866471	I	63.58	Chr2	368383212	2.61e-29	chr2LG1	324461120			G	H	H	G	G	H	H	H	G	H	H	H	-	H	Y	H	H	G	G	G	H	Y	G	G	G	H	G	Y	Y	Y	Y	G	Y	H	H	H	H	G	H	Y
AX-183564772	I	63.58	Chr2	369305334	1.22e-27	chr2LG1	322008503			G	H	H	G	G	H	H	H	G	H	H	H	Y	H	Y	H	H	G	G	G	Y	Y	-	G	G	H	G	Y	Y	Y	Y	G	Y	H	H	H	H	G	H	Y
AX-183590856	I	63.83	Chr2	370850934	2.61e-29	chr2LG1	323131706			G	H	H	G	G	H	H	H	G	H	H	H	Y	H	Y	H	H	H	G	G	Y	Y	G	G	G	H	H	Y	Y	Y	Y	G	H	H	H	H	H	G	H	Y
AX-183861966	I	63.83	Chr2	370919845	1.22e-27	chr2LG1	324597558			G	H	H	G	G	H	H	H	G	H	H	H	Y	H	Y	H	H	G	G	G	H	Y	G	G	G	H	H	Y	Y	Y	Y	G	Y	H	H	H	H	G	H	Y
AX-183590854	I	63.83	Chr2	370921297	1.22e-27	chr2LG1	324596106			G	H	H	G	G	H	H	H	G	H	H	H	-	H	Y	H	H	H	G	G	H	Y	G	G	G	H	-	Y	Y	Y	Y	G	-	H	H	H	H	G	H	Y
AX-183570728	I	63.95	Chr2	371029179	1.22e-27	chr2LG1	374910913			G	H	H	G	G	H	H	H	G	H	H	H	-	H	Y	H	H	G	G	G	Y	Y	G	G	G	H	H	Y	Y	Y	Y	G	Y	H	H	H	H	G	H	Y
AX-183635879	I	63.95	Chr2	372366500	2.61e-29	scaffold03244	5830			G	H	H	G	G	H	H	H	G	H	H	H	Y	H	Y	H	H	-	G	G	Y	Y	G	G	G	H	H	Y	Y	Y	Y	G	H	H	H	H	H	G	H	Y
AX-183869452	I	64.07	Chr2	375379821	2.61e-29	chr2LG1	328438121			G	H	H	G	G	H	H	H	G	H	H	H	Y	H	Y	H	H	G	G	G	Y	Y	G	G	G	H	-	Y	Y	Y	Y	G	Y	H	H	H	H	G	H	Y
AX-183869580	I	64.07	Chr2	375429829	1.22e-27	chr2LG1	328501285			G	H	H	G	G	H	H	H	G	H	H	H	Y	H	Y	H	H	G	G	G	Y	Y	G	G	G	H	-	Y	Y	Y	Y	G	Y	H	H	H	H	G	H	Y
AX-183590869	I	64.2	Chr2	376758313	1.22e-27	chr2LG1	329571831			G	H	H	G	G	H	H	Y	G	H	H	H	Y	H	Y	H	H	-	G	G	H	Y	G	G	G	H	G	Y	Y	Y	Y	G	-	H	H	H	H	G	H	Y
AX-183572630	I	64.2	Chr2	377119465	1.22e-27	chr2LG1	329427677			G	H	H	G	G	H	H	H	G	H	H	H	Y	H	Y	H	H	G	G	G	H	Y	G	G	G	H	G	Y	Y	Y	Y	G	Y	H	H	H	H	-	H	Y
AX-183590875	I	64.45	Chr2	377940314	1.22e-27	chr2LG1	331305470			G	H	H	G	G	H	H	H	G	H	H	H	Y	H	Y	H	H	G	G	G	Y	Y	G	-	G	H	H	Y	Y	Y	Y	G	Y	H	H	H	H	G	H	Y
AX-183576189	I	64.45	Chr2	378052968	1.22e-27	chr2LG1	331184752			G	H	H	G	G	H	H	H	G	H	H	H	Y	H	Y	H	H	G	G	G	-	Y	G	G	G	H	G	Y	Y	Y	Y	G	-	H	H	H	H	G	H	Y
AX-183590872	I	64.45	Chr2	378067778	1.22e-27	chr2LG1	331168676			G	H	H	G	-	H	H	H	-	H	H	H	H	H	Y	H	H	G	G	G	-	Y	G	G	G	-	G	Y	Y	Y	Y	G	H	H	H	H	H	G	H	Y
AX-183887624	I	64.57	Chr2	378424230	2.61e-29	chr2LG1	330368943			G	H	H	-	G	H	H	H	G	H	H	H	Y	H	Y	H	H	-	G	G	H	Y	G	-	G	H	H	Y	Y	Y	Y	-	Y	H	H	H	H	G	H	Y
AX-183865870	I	64.57	Chr2	378807766	1.22e-27	chr2LG1	330632172			G	H	H	G	G	H	H	H	G	H	H	H	Y	H	Y	H	H	G	G	G	H	Y	G	G	G	H	H	Y	Y	Y	Y	G	Y	H	H	H	H	G	H	Y
AX-183863400	I	64.69	Chr2	380910901	1.22e-27	chr2LG1	331778268			G	H	H	G	G	H	H	H	G	H	H	H	-	H	Y	H	-	G	G	G	H	Y	G	G	G	H	-	Y	Y	-	Y	G	H	H	H	H	H	G	H	Y
AX-183892111	I	64.69	Chr2	381591295	2.61e-29	chr2LG1	334278789			G	H	H	G	G	H	H	H	G	H	H	H	-	H	Y	H	H	G	G	G	-	Y	G	G	G	H	G	Y	Y	Y	Y	G	Y	H	H	H	H	G	H	Y
AX-183865339	I	64.69	Chr2	381901817	2.61e-29	chr2LG1	334744610			G	H	H	G	G	H	H	H	G	H	H	H	-	H	Y	H	H	G	G	G	-	Y	G	G	G	H	-	Y	Y	Y	Y	G	-	H	H	H	H	G	H	Y
AX-183564507	I	64.69	Chr2	382162948	2.61e-29	chr2LG1	333867663			G	H	H	G	G	H	H	H	G	H	H	H	Y	H	Y	H	H	G	G	G	Y	Y	G	-	G	H	H	Y	Y	-	Y	G	Y	H	H	H	H	G	H	Y
AX-183590893	I	64.69	Chr2	382279892	2.61e-29	chr2LG1	333770874			G	H	H	G	G	H	H	H	G	H	H	H	Y	H	Y	H	H	G	G	G	-	Y	G	G	G	H	-	Y	Y	Y	Y	G	-	H	H	H	H	G	H	Y
AX-183861548	I	64.69	Chr2	382324964	2.61e-29	chr2LG1	333728079			G	H	H	G	G	H	H	H	G	H	H	H	-	H	Y	H	H	G	G	G	H	Y	G	H	G	H	G	Y	Y	Y	Y	G	Y	H	H	H	H	G	H	Y
AX-183573253	I	64.82	Chr2	383666666	2.61e-29	chr2LG1	335191136			G	H	H	G	G	H	H	H	G	H	H	H	Y	Y	Y	H	H	G	G	G	Y	Y	G	G	G	H	H	Y	Y	Y	Y	G	Y	H	H	H	H	G	H	Y
AX-183576201	I	64.82	Chr2	383687724	1.22e-27	chr2LG1	335170088			G	H	H	G	G	H	H	H	G	H	H	H	Y	Y	Y	H	H	G	G	G	H	Y	G	G	G	H	-	Y	Y	Y	Y	G	Y	H	H	H	H	G	H	Y
AX-183576199	I	64.82	Chr2	383906521	1.22e-27	chr2LG1	334937441			G	H	H	G	G	H	H	H	G	H	H	H	H	Y	Y	H	H	G	G	G	Y	Y	G	G	G	H	G	Y	Y	H	Y	G	Y	H	H	H	H	G	H	Y
AX-183573250	I	64.82	Chr2	383908642	2.61e-29	chr2LG1	334935320			G	H	H	G	G	H	H	H	G	H	H	H	Y	Y	Y	H	H	-	G	G	Y	Y	G	G	G	H	H	Y	Y	Y	Y	G	Y	H	H	H	H	G	H	Y
AX-183862725	I	64.82	Chr2	383909571	2.61e-29	chr2LG1	334934284			G	H	H	G	G	H	H	H	G	H	H	H	Y	Y	Y	H	H	G	G	G	H	Y	G	G	G	H	G	Y	Y	Y	Y	G	H	H	H	H	H	G	H	Y
AX-183864839	I	64.82	Chr2	384068649	2.61e-29	chr2LG1	334797701			G	H	H	G	G	H	H	H	G	H	H	H	Y	Y	Y	H	H	G	G	G	-	Y	G	G	G	H	-	Y	Y	-	Y	G	Y	H	H	H	H	G	H	Y
AX-183564519	I	64.82	Chr2	384230913	1.22e-27	chr2LG1	335558025			G	H	H	G	G	H	H	H	G	H	H	H	Y	Y	Y	H	H	G	G	G	H	Y	G	G	G	H	G	Y	Y	Y	Y	G	Y	H	H	H	H	G	H	Y
AX-183861204	I	64.82	Chr2	384287265	1.22e-27	chr2LG1	335602276			G	H	H	G	G	H	H	H	G	H	H	H	Y	-	Y	H	H	G	G	G	-	Y	G	G	G	H	-	Y	Y	Y	Y	G	Y	H	H	H	H	G	H	Y
AX-183570695	I	64.82	Chr2	385083020	1.22e-27	chr2LG1	335670778			G	H	H	G	G	H	H	H	G	H	H	H	-	Y	Y	H	H	G	G	G	Y	Y	G	G	G	H	H	Y	Y	-	Y	G	Y	H	H	H	H	G	H	Y
AX-183866221	I	64.82	Chr2	385507741	1.22e-27	chr2LG1	335857142			G	H	H	G	G	H	H	H	G	H	H	H	Y	Y	Y	H	H	G	G	G	Y	Y	G	G	G	H	H	Y	Y	Y	Y	G	-	H	H	H	H	G	H	Y
AX-183570696	I	64.82	Chr2	385508055	1.22e-27	chr2LG1	335856828			G	H	H	G	G	H	H	H	G	H	H	H	Y	Y	Y	H	H	G	-	G	-	Y	-	G	G	H	-	Y	Y	Y	Y	G	Y	H	H	H	H	G	H	-
AX-183576202	I	64.82	Chr2	385610639	1.22e-27	chr2LG1	336286999			G	H	H	G	G	H	H	H	G	H	H	H	-	Y	Y	H	H	-	G	G	-	Y	G	G	G	H	-	Y	Y	Y	Y	G	Y	H	H	H	H	G	H	Y
AX-183590911	I	64.82	Chr2	385629155	2.61e-29	chr2LG1	336268287			G	H	H	G	G	H	H	H	G	H	H	H	Y	Y	Y	H	H	G	G	G	-	Y	G	G	-	H	H	Y	Y	H	Y	G	Y	H	H	H	H	G	-	Y
AX-183590940	I	64.94	Chr2	386134526	2.61e-29	chr2LG1	336915732			G	H	H	G	G	H	H	H	G	H	H	H	Y	Y	Y	H	H	G	G	G	H	Y	G	G	G	H	G	Y	Y	Y	Y	G	-	H	H	H	H	G	H	Y
AX-183636707	I	65.19	Chr2	387204071	1.22e-27	scaffold04142	14859			G	H	H	G	G	H	H	H	G	H	H	H	Y	Y	Y	H	H	G	G	G	H	Y	G	G	G	H	G	Y	Y	Y	Y	G	Y	H	H	H	H	G	H	Y
AX-183590948	I	65.19	Chr2	387245124	1.22e-27	chr2LG1	337329102			G	H	H	G	G	H	H	H	G	H	H	H	Y	Y	Y	H	H	-	G	G	Y	Y	G	G	G	H	H	Y	Y	Y	Y	G	Y	H	H	H	H	G	H	Y
AX-183573740	I	65.19	Chr2	387255040	2.61e-29	chr2LG1	337339018			G	H	H	G	G	H	H	H	G	H	H	H	Y	Y	Y	H	H	G	G	G	H	Y	G	G	G	H	G	Y	Y	-	Y	G	Y	H	H	H	H	G	H	Y
AX-183864705	I	65.19	Chr2	387255213	2.61e-29	chr2LG1	337339191			G	H	H	G	G	H	H	H	G	H	H	H	-	Y	Y	H	H	G	G	G	H	Y	G	G	G	H	H	Y	Y	-	Y	G	Y	H	H	H	H	G	H	Y
AX-183576709	I	65.44	Chr2	387576081	1.22e-27	scaffold01923	15655			G	H	H	G	G	H	H	H	G	H	H	H	Y	Y	Y	H	H	G	G	G	Y	Y	G	G	G	H	G	Y	Y	-	Y	G	-	H	H	H	H	G	H	Y
AX-183564526	I	65.44	Chr2	387591583	2.61e-29	chr2LG1	337735664			G	H	H	G	G	H	H	H	G	H	H	H	Y	Y	Y	H	H	G	G	G	H	Y	G	G	G	H	H	Y	Y	Y	Y	G	H	H	H	H	H	G	H	Y
AX-183573744	I	65.44	Chr2	388080490	2.61e-29	chr2LG1	338202859			G	H	H	G	G	H	H	H	G	H	H	H	Y	Y	Y	H	H	G	G	G	H	Y	G	G	G	H	-	Y	Y	Y	Y	G	Y	H	H	H	H	G	H	Y
AX-183573745	I	65.44	Chr2	388081808	1.22e-27	chr2LG1	338204177			G	H	H	G	G	H	H	H	G	H	H	H	Y	Y	Y	H	H	G	G	G	Y	Y	G	-	G	H	-	Y	Y	H	Y	G	Y	H	H	H	H	G	H	Y
AX-183573746	I	65.44	Chr2	388083617	1.22e-27	chr2LG1	338205986			G	H	H	G	G	H	H	H	G	H	H	H	Y	Y	Y	H	H	-	G	G	H	Y	G	G	G	H	H	Y	Y	-	Y	G	-	H	H	H	H	G	H	Y
AX-183590963	I	65.56	Chr2	388084709	2.61e-29	chr2LG1	338207078			G	-	H	G	G	H	H	-	G	H	H	H	Y	Y	Y	H	H	G	H	G	H	Y	G	G	G	H	G	Y	Y	Y	Y	G	Y	H	H	H	H	G	H	Y
AX-183590964	I	65.56	Chr2	388084814	1.22e-27	chr2LG1	338207183			G	H	H	G	G	H	H	H	G	H	H	H	Y	Y	Y	H	H	-	G	G	H	Y	G	G	G	H	G	Y	Y	Y	Y	G	Y	H	H	H	H	G	H	Y
AX-183564527	I	65.56	Chr2	388125857	1.22e-27	chr2LG1	338247854			G	H	H	G	G	H	H	H	G	H	H	H	Y	Y	Y	H	H	G	G	G	-	Y	G	G	G	H	H	Y	Y	Y	Y	G	-	H	H	H	H	G	H	Y
AX-183877982	I	65.56	Chr2	388190052	2.61e-29	chr2LG1	338309287			G	H	H	G	G	H	H	H	G	H	-	H	-	Y	Y	H	H	G	G	G	H	Y	G	G	G	H	-	Y	Y	Y	Y	-	Y	H	H	H	-	G	H	Y
AX-183564528	I	65.69	Chr2	388254051	2.61e-29	chr2LG1	338373662			G	H	H	G	G	H	H	H	G	H	H	H	Y	Y	Y	H	H	G	G	G	H	Y	G	G	G	H	H	Y	Y	Y	Y	G	Y	H	H	H	H	G	H	Y
AX-183865364	I	65.69	Chr2	388280118	1.22e-27	chr2LG1	338400518			G	H	H	G	G	H	H	H	G	H	H	H	Y	Y	Y	H	H	G	G	G	-	Y	G	G	G	H	G	Y	Y	Y	Y	G	Y	H	H	H	H	G	H	Y
AX-183867335	I	66.06	Chr2	388875067	2.61e-29	chr2LG1	339027323			G	H	H	G	G	H	H	H	G	H	H	H	Y	Y	Y	H	H	-	G	G	H	Y	G	-	G	H	-	Y	Y	Y	Y	G	-	H	H	H	H	G	H	Y
AX-183865109	I	66.18	Chr2	388875671	1.22e-27	chr2LG1	339027927			G	H	H	G	G	H	H	H	G	H	H	H	Y	Y	Y	H	H	G	G	G	H	Y	G	G	G	H	G	Y	Y	Y	Y	G	H	H	H	H	H	G	H	Y
AX-183590993	I	66.43	Chr2	390687275	1.22e-27	chr2LG1	341716425			G	H	H	G	G	Y	H	H	G	H	H	H	-	Y	Y	H	H	-	G	G	-	Y	G	H	G	-	-	Y	Y	Y	H	G	-	H	H	H	H	G	H	Y
AX-183576215	I	66.43	Chr2	390693054	1.22e-27	chr2LG1	341710646			G	H	H	G	G	Y	H	H	G	H	H	H	-	Y	Y	H	H	G	G	G	H	Y	G	G	G	H	G	Y	Y	Y	Y	G	Y	H	H	H	H	G	H	Y
AX-183863960	I	66.43	Chr2	390693353	1.22e-27	chr2LG1	341710347			G	H	H	G	G	Y	H	H	G	H	H	H	Y	Y	Y	H	H	G	G	G	H	Y	G	G	G	H	G	Y	Y	Y	H	G	Y	H	H	H	H	G	H	Y
AX-183576214	I	66.55	Chr2	390719872	2.61e-29	chr2LG1	341683165			G	H	H	G	G	Y	H	H	G	H	H	H	Y	Y	Y	H	H	G	G	G	H	Y	G	-	G	H	H	Y	Y	-	Y	G	Y	H	H	H	H	G	H	Y
AX-183576212	I	66.55	Chr2	391116154	1.22e-27	chr2LG1	340187573			G	H	H	G	G	Y	H	H	G	H	H	H	Y	Y	Y	H	H	-	G	G	-	Y	G	G	G	H	H	Y	Y	Y	Y	G	Y	H	H	H	H	G	H	Y
AX-183866410	I	66.55	Chr2	391179526	2.61e-29	chr2LG1	340245741			G	H	-	G	G	Y	H	H	G	H	H	H	Y	Y	Y	H	H	G	-	G	H	Y	G	G	G	H	G	Y	Y	Y	Y	G	-	H	H	H	H	G	H	Y
AX-183576213	I	66.68	Chr2	391917414	2.61e-29	chr2LG1	341096430			G	H	H	G	G	Y	H	H	G	H	H	H	Y	Y	Y	H	H	H	G	G	-	Y	G	G	G	H	G	Y	Y	Y	Y	G	H	H	H	H	H	G	H	Y
AX-183564535	I	66.68	Chr2	392018837	2.61e-29	chr2LG1	341818193			G	H	H	G	G	Y	H	H	G	H	H	H	-	Y	Y	H	H	H	G	G	-	Y	G	G	G	H	-	Y	Y	Y	Y	G	-	H	H	H	H	G	H	Y
AX-183570702	I	66.68	Chr2	392018963	1.22e-27	chr2LG1	341818319			G	H	H	G	G	Y	H	H	G	H	H	H	H	Y	Y	H	H	-	G	G	Y	Y	G	G	G	-	H	Y	Y	H	Y	G	H	H	H	-	H	G	H	Y
AX-183590996	I	66.93	Chr2	392019734	2.61e-29	chr2LG1	341819090			G	H	H	G	G	Y	H	-	G	H	H	H	Y	Y	Y	H	H	H	G	G	Y	Y	G	G	G	H	G	Y	Y	Y	Y	G	Y	H	H	H	H	G	H	Y
AX-183877033	I	67.05	Chr2	392075334	1.22e-27	chr2LG1	341885187			G	H	H	-	G	Y	H	-	G	H	H	H	Y	Y	Y	H	H	H	-	G	H	Y	G	G	G	H	H	Y	Y	Y	Y	H	Y	H	H	H	H	G	H	Y
AX-183590998	I	67.3	Chr2	392081281	1.22e-27	chr2LG1	341891134			G	H	H	G	G	Y	H	H	G	-	H	H	-	Y	Y	H	H	H	G	G	H	Y	G	-	G	H	G	Y	Y	-	Y	G	-	H	H	H	H	G	H	Y
AX-183860692	I	67.3	Chr2	392330136	2.61e-29	chr2LG1	342259642			G	H	H	G	G	Y	H	H	G	H	H	H	Y	Y	Y	H	H	H	G	G	-	Y	G	G	G	H	-	Y	Y	Y	Y	G	Y	H	H	H	H	G	H	Y
AX-183576217	I	67.3	Chr2	392331269	1.22e-27	chr2LG1	342260775			G	H	H	G	G	Y	H	H	G	H	H	H	Y	Y	Y	H	H	H	G	G	H	Y	G	G	G	H	H	Y	Y	-	Y	G	Y	H	H	H	H	G	H	Y
AX-183591008	I	67.3	Chr2	392332912	1.22e-27	chr2LG1	342262418			G	H	H	G	G	Y	H	H	G	H	H	H	Y	Y	Y	H	H	H	G	G	Y	Y	G	G	G	H	-	Y	Y	Y	Y	G	-	H	H	H	H	G	H	Y
AX-183979515	I	67.3	Chr2	392425356	2.61e-29	chr2LG1	343360712			G	H	H	G	G	Y	H	H	G	H	H	H	H	Y	Y	H	H	H	G	G	H	Y	G	G	G	H	G	Y	Y	Y	Y	G	-	H	H	H	H	G	H	Y
AX-183890366	I	67.3	Chr2	392554094	2.61e-29	chr2LG1	343237968			G	H	H	G	G	Y	H	H	G	H	H	H	Y	Y	Y	H	H	H	G	G	H	Y	G	G	G	H	G	Y	Y	Y	Y	G	Y	H	H	H	H	G	H	Y
AX-183564778	I	67.55	Chr2	395295595	1.22e-27	chr2LG1	345466405			G	H	H	G	G	Y	H	H	G	H	H	H	Y	Y	Y	H	H	H	G	G	H	Y	G	G	G	H	G	Y	Y	Y	Y	G	-	H	H	H	H	G	G	Y
AX-183564536	I	67.67	Chr2	395513674	1.22e-27	chr2LG1	343403238			G	H	H	G	G	Y	H	H	G	H	H	H	Y	Y	Y	H	H	H	G	G	H	Y	G	H	G	H	G	Y	Y	Y	Y	G	H	H	H	H	H	G	G	Y
AX-183867374	I	67.67	Chr2	395513911	1.22e-27	chr2LG1	343403001			G	H	H	G	G	Y	H	H	G	H	H	H	Y	Y	Y	H	H	H	G	G	Y	Y	G	G	G	H	H	Y	Y	Y	Y	G	Y	H	H	H	H	G	G	Y
AX-183592237	I	67.79	Chr2	396611504	1.22e-27	chr2LG1	346860046			G	H	H	G	G	Y	H	-	G	H	H	H	Y	Y	-	H	-	-	G	G	-	Y	G	G	G	H	G	Y	Y	-	H	G	H	H	H	H	H	G	G	Y
AX-183573331	I	67.92	Chr2	396613399	1.22e-27	chr2LG1	346861941			G	H	H	G	G	Y	H	H	G	H	H	H	Y	Y	Y	H	H	H	G	G	Y	Y	G	G	G	H	G	Y	Y	H	Y	G	-	H	H	H	H	G	G	Y
AX-183576421	I	68.29	Chr2	397077031	2.61e-29	chr2LG1	347735491			G	H	H	G	G	Y	H	H	G	H	H	H	Y	Y	Y	H	H	H	G	G	H	Y	G	-	G	H	-	Y	Y	H	Y	G	Y	H	H	H	H	G	G	Y
AX-183885557	I	68.42	Chr2	397079013	2.61e-29	chr2LG1	347737473			G	H	H	G	G	Y	H	H	G	H	H	H	-	Y	Y	H	H	H	G	G	H	Y	G	G	G	H	G	Y	Y	H	Y	G	-	H	H	H	H	G	G	Y
AX-183866271	I	68.42	Chr2	397120227	2.61e-29	chr2LG1	347780766			G	H	H	G	G	Y	H	H	G	H	H	H	Y	Y	Y	H	H	H	G	G	Y	Y	G	-	G	H	G	Y	Y	H	Y	G	H	H	H	H	H	G	G	Y
AX-183866187	I	68.66	Chr2	397120858	2.61e-29	chr2LG1	347781397			G	H	H	G	G	Y	H	H	G	H	H	H	Y	Y	Y	H	H	H	G	G	Y	Y	G	G	G	H	G	Y	Y	H	Y	G	Y	H	H	H	H	G	G	Y
AX-183576222	I	68.66	Chr2	397356438	1.22e-27	chr2LG1	349181998			G	H	H	G	G	Y	H	H	G	H	H	H	Y	Y	Y	H	H	H	G	G	Y	Y	G	G	G	H	G	Y	Y	H	Y	G	Y	H	H	H	H	G	G	Y
AX-183572637	I	68.66	Chr2	398134507	1.22e-27	chr2LG1	347309180			G	H	H	G	G	Y	H	H	G	H	H	H	Y	Y	Y	H	H	H	G	G	-	Y	G	G	G	H	G	Y	Y	H	Y	G	Y	H	H	H	H	G	G	Y
AX-183576221	I	68.66	Chr2	398134920	1.22e-27	chr2LG1	347309593			G	H	H	G	G	Y	H	H	G	H	H	H	Y	Y	Y	H	H	H	G	G	H	Y	G	-	G	H	-	Y	Y	H	Y	G	-	H	H	H	H	G	G	Y
AX-183572638	I	68.79	Chr2	398136792	2.61e-29	chr2LG1	347311465			G	H	H	G	G	Y	-	H	G	H	H	H	-	Y	Y	H	Y	H	G	G	-	Y	G	H	G	H	-	Y	Y	H	-	G	-	H	H	H	H	G	G	Y
AX-183862671	I	68.91	Chr2	399232800	1.22e-27	chr2LG1	351374414			G	H	H	G	G	Y	H	H	G	H	H	H	Y	Y	Y	H	H	H	G	G	Y	Y	G	H	G	H	H	Y	Y	H	Y	G	Y	H	H	H	H	G	G	Y
AX-183564788	I	69.16	Chr2	399686456	1.22e-27	chr2LG1	351867486			G	H	H	G	G	Y	H	H	G	H	H	H	Y	Y	Y	H	H	H	G	G	H	Y	G	G	G	H	-	Y	Y	H	Y	-	H	H	H	H	H	G	G	Y
AX-183592272	I	69.16	Chr2	400781804	1.22e-27	chr2LG1	350224901			G	H	H	G	G	Y	H	H	G	H	H	H	Y	Y	Y	H	H	H	G	G	Y	Y	G	G	G	H	-	Y	Y	H	Y	G	H	H	H	H	H	G	G	Y
AX-183576429	I	69.41	Chr2	400782033	2.61e-29	chr2LG1	350225130			G	H	H	G	G	Y	H	H	G	H	H	H	Y	Y	Y	H	H	H	G	G	Y	Y	G	G	G	H	G	Y	Y	H	Y	G	Y	H	H	H	H	G	G	Y
AX-183872557	I	69.41	Chr2	400784661	1.22e-27	chr2LG1	350227758			G	-	H	G	G	Y	H	H	G	H	H	H	Y	Y	Y	H	H	H	G	G	H	Y	G	G	G	H	G	Y	Y	-	Y	G	-	H	H	-	H	G	G	Y
AX-183592273	I	69.41	Chr2	400786297	1.22e-27	chr2LG1	350229388			G	H	H	G	G	Y	H	H	G	H	H	H	H	Y	Y	H	H	H	G	G	H	Y	-	G	G	H	G	Y	Y	H	Y	G	H	H	H	H	H	G	G	Y
AX-183564793	I	69.78	Chr2	403233337	1.22e-27	chr2LG1	353421881			G	H	H	G	G	Y	H	G	G	H	H	H	Y	Y	Y	H	H	H	G	G	-	Y	G	-	G	H	-	Y	Y	H	Y	G	Y	H	H	H	H	G	G	Y
AX-183576441	I	69.78	Chr2	403329635	2.61e-29	chr2LG1	353598259			G	H	H	G	G	Y	H	G	G	H	H	H	Y	Y	Y	H	H	H	G	G	Y	Y	G	-	G	H	-	Y	Y	H	Y	G	Y	H	H	H	H	G	G	Y
AX-183868409	I	69.9	Chr2	404330218	1.22e-27	chr2LG1	354778769			G	H	H	G	G	Y	H	G	G	H	H	H	Y	Y	Y	H	H	H	G	G	Y	Y	G	-	G	H	-	Y	Y	H	Y	G	Y	H	H	H	H	G	G	Y
AX-183863479	I	70.28	Chr2	405642865	2.61e-29	chr2LG1	355308894			G	H	H	G	G	Y	H	G	G	H	H	H	Y	Y	Y	H	H	H	G	G	Y	Y	G	G	G	H	G	Y	Y	H	Y	G	Y	H	H	H	H	G	G	Y
AX-183592352	I	70.53	Chr2	406099124	2.61e-29	chr2LG1	353157891			G	H	H	G	G	Y	H	G	G	H	H	H	Y	Y	Y	H	H	H	G	G	H	Y	G	H	G	H	G	Y	Y	H	Y	G	Y	H	H	H	H	G	G	Y
AX-183860974	I	70.65	Chr2	406356096	2.61e-29	chr2LG1	356014096			G	H	H	G	G	Y	H	-	G	H	H	H	-	Y	Y	H	H	H	G	G	Y	Y	G	-	G	H	G	Y	Y	H	-	G	Y	H	H	H	H	G	G	Y
AX-183573343	I	70.77	Chr2	406824085	1.22e-27	chr2LG1	356440074			G	H	H	G	G	Y	H	G	G	H	H	H	Y	Y	Y	H	H	H	G	G	H	Y	G	G	G	H	G	Y	Y	H	Y	G	Y	H	H	H	H	G	G	Y
AX-183867744	I	70.77	Chr2	406824411	1.22e-27	chr2LG1	356440400			G	H	H	G	G	Y	H	G	G	H	H	H	H	Y	Y	H	H	H	G	G	-	Y	G	-	G	H	G	Y	Y	H	Y	G	Y	H	H	H	H	G	G	Y
AX-183592376	I	70.77	Chr2	406825382	1.22e-27	chr2LG1	356441371			G	H	H	G	G	Y	H	H	G	H	H	H	Y	Y	Y	H	H	H	G	G	H	Y	G	G	G	H	G	Y	Y	H	Y	G	Y	H	H	H	H	G	G	Y
AX-183564818	I	71.52	Chr2	408029937	2.61e-29	chr2LG1	357743812			G	H	H	G	G	Y	H	G	G	H	H	H	Y	Y	Y	H	H	H	G	G	H	Y	G	G	G	H	G	Y	Y	H	Y	G	-	H	H	H	H	G	G	Y
AX-183564819	I	71.64	Chr2	408041638	1.22e-27	chr2LG1	357755506			G	H	H	G	G	Y	H	G	G	H	H	H	Y	Y	Y	H	H	H	G	G	-	Y	G	G	G	H	H	Y	Y	H	Y	G	Y	H	H	H	H	G	G	Y
AX-183870288	I	71.64	Chr2	408195574	1.22e-27	scaffold02923	33373			G	H	H	G	G	Y	H	G	G	H	H	H	Y	Y	Y	H	H	H	G	G	H	Y	G	G	G	H	G	Y	Y	H	Y	G	Y	H	H	H	H	G	G	Y
AX-183591047	I	71.64	Chr2	408282348	2.61e-29	chr2LG1	362482822			G	H	H	G	G	Y	H	-	G	H	H	H	-	Y	Y	H	H	H	G	G	H	Y	G	G	G	H	G	Y	Y	H	Y	G	H	H	H	H	H	G	G	Y
AX-183573257	I	71.64	Chr2	408313267	1.22e-27	chr2LG1	362450382			G	H	H	G	G	Y	H	G	G	H	H	H	Y	Y	Y	H	H	H	G	G	Y	Y	G	G	G	H	-	Y	Y	H	Y	G	Y	H	H	H	H	G	G	Y
AX-183570704	I	71.64	Chr2	408360771	2.61e-29	chr2LG1	358151364			G	H	H	G	G	Y	H	G	G	H	H	H	Y	Y	Y	H	H	H	G	G	Y	Y	G	G	G	H	G	Y	Y	H	Y	G	Y	H	H	H	H	G	G	Y
AX-183862976	I	71.89	Chr2	410138320	1.22e-27	chr2LG1	361401900			G	H	H	G	G	Y	H	G	G	H	H	H	Y	Y	Y	H	H	H	G	G	-	Y	G	G	G	H	G	Y	Y	H	Y	G	Y	H	H	H	H	G	G	Y
AX-183573751	I	71.89	Chr2	410357784	2.61e-29	chr2LG1	362218037			G	H	H	G	G	H	H	-	G	H	H	H	H	Y	Y	H	H	H	G	G	-	Y	G	G	G	H	-	H	Y	H	Y	G	Y	H	H	H	H	G	G	Y
AX-183591052	I	71.89	Chr2	412028784	2.61e-29	chr2LG1	362637089			G	H	H	G	G	Y	H	G	G	H	H	H	Y	Y	Y	H	H	H	G	G	-	Y	G	-	G	H	G	Y	Y	H	Y	G	-	H	H	H	H	G	G	Y
AX-183564541	I	71.89	Chr2	412031971	2.61e-29	chr2LG1	362633902			G	H	H	G	G	Y	H	G	G	H	H	H	H	Y	Y	H	H	H	G	G	Y	Y	G	G	G	H	G	Y	Y	H	Y	G	Y	H	H	H	H	G	G	Y
AX-183893189	I	72.02	Chr2	412035493	2.61e-29	chr2LG1	362630380			G	H	H	G	G	Y	H	G	G	H	H	H	H	Y	Y	H	H	H	G	G	H	Y	G	-	G	H	G	Y	Y	H	Y	G	Y	H	H	H	H	G	G	Y
AX-183564833	I	72.14	Chr2	412328577	1.22e-27	chr2LG1	359713347			G	H	H	G	G	Y	H	G	G	H	H	H	Y	Y	Y	H	H	H	G	G	H	Y	G	G	G	H	-	Y	Y	H	Y	G	Y	H	H	H	H	G	G	Y
AX-183891677	I	72.14	Chr2	412541132	5.65e-26	chr2LG1	362719267			G	H	H	G	G	Y	H	G	G	H	H	H	Y	Y	Y	H	H	H	G	G	H	Y	G	G	G	H	G	Y	Y	H	Y	G	H	H	H	H	H	G	G	Y
AX-183572549	I	77.89	Chr2	422942313	1.22e-27	scaffold02743	166363			G	H	H	G	G	Y	H	G	G	H	H	H	Y	Y	Y	H	H	H	G	G	Y	Y	G	H	G	H	G	H	Y	H	Y	H	Y	H	G	H	H	H	G	Y
AX-183576249	I	78.02	Chr2	424182084	2.61e-29	chr2LG1	372156084			G	H	H	G	G	Y	H	G	G	H	H	H	Y	Y	Y	H	H	H	G	G	H	Y	G	H	G	H	H	H	Y	H	Y	H	Y	H	G	H	H	H	G	Y
AX-183862397	I	78.02	Chr2	424182952	5.65e-26	chr2LG1	372156946			G	H	H	G	G	Y	H	G	G	H	H	H	Y	Y	Y	H	H	H	G	G	-	Y	G	H	G	H	H	H	Y	H	Y	H	Y	H	G	H	H	H	G	Y
AX-183570723	I	78.02	Chr2	424182998	2.61e-29	chr2LG1	372156992			G	H	H	G	G	Y	H	G	G	H	H	H	H	Y	Y	H	H	H	G	G	Y	Y	G	H	G	H	H	H	Y	H	Y	H	Y	H	G	H	H	H	G	Y
AX-183573275	I	78.14	Chr2	425158282	2.61e-29	chr2LG1	372868301			G	H	H	G	G	Y	H	-	G	H	H	H	Y	Y	Y	H	H	H	G	G	Y	Y	G	H	G	H	H	H	Y	H	Y	H	Y	H	G	H	H	H	G	Y
AX-183573276	I	78.14	Chr2	425158493	1.22e-27	chr2LG1	372868512			G	H	H	G	G	Y	H	G	G	H	H	-	H	Y	Y	H	H	H	G	G	-	Y	G	H	G	H	G	H	Y	H	Y	H	Y	-	G	H	H	H	G	Y
AX-183862308	I	78.14	Chr2	425158873	2.61e-29	chr2LG1	372868892			G	H	H	G	G	Y	H	G	G	H	H	H	Y	Y	Y	H	H	H	G	G	Y	Y	G	H	G	H	H	H	Y	H	Y	H	Y	H	G	H	H	H	G	Y
AX-183576259	I	78.64	Chr2	426756127	2.61e-29	chr2LG1	374159447			G	H	H	G	G	Y	H	G	G	H	H	H	Y	H	Y	H	H	H	G	G	Y	Y	G	H	G	H	G	H	Y	H	Y	H	H	H	G	H	H	H	G	Y
AX-183591203	I	78.64	Chr2	426761756	2.61e-29	chr2LG1	374165667			G	H	H	G	G	Y	H	G	G	H	H	H	Y	Y	Y	H	H	H	G	G	Y	Y	G	H	G	H	G	H	Y	H	Y	H	Y	H	G	H	H	H	G	Y
AX-183564577	I	78.76	Chr2	426846964	2.61e-29	chr2LG1	374274783			G	H	H	G	G	Y	H	G	G	H	H	H	Y	Y	Y	H	H	H	G	G	Y	Y	G	H	G	H	G	H	Y	H	Y	H	H	H	G	H	H	H	G	Y
AX-183881136	I	78.88	Chr2	426847115	1.22e-27	chr2LG1	374274934			G	H	H	G	G	Y	H	G	G	H	H	H	Y	Y	Y	H	H	H	G	G	Y	Y	G	H	G	H	H	H	Y	H	Y	H	Y	H	G	H	H	H	G	Y
AX-183591208	I	78.88	Chr2	426847355	1.22e-27	chr2LG1	374275174			G	H	H	G	G	Y	H	G	G	H	H	H	Y	Y	Y	H	H	H	G	G	H	Y	G	H	G	H	H	H	Y	H	Y	H	Y	H	G	H	H	H	G	Y
AX-183863569	I	79.26	Chr2	426982555	5.65e-26	chr2LG1	374543729			G	H	H	G	G	Y	H	G	G	H	H	H	Y	Y	Y	H	H	H	G	G	Y	Y	G	H	G	H	H	H	Y	H	Y	H	Y	H	G	H	H	H	G	Y
AX-183570726	I	79.26	Chr2	426984043	1.22e-27	chr2LG1	374545233			G	H	H	G	G	Y	H	G	G	H	H	H	Y	Y	Y	H	H	H	G	G	Y	Y	G	H	G	H	G	H	Y	H	Y	H	Y	H	G	H	H	H	G	Y
AX-183573278	I	79.26	Chr2	426984199	2.61e-29	chr2LG1	374545389			G	H	H	G	G	Y	H	G	G	H	H	H	Y	Y	Y	H	H	H	G	G	Y	Y	G	H	G	H	H	H	Y	H	Y	H	Y	H	G	H	H	H	G	Y
AX-183591212	I	79.38	Chr2	427317577	2.61e-29	chr2LG1	375025460			G	H	H	G	G	Y	H	G	G	H	H	H	Y	Y	Y	H	H	H	G	G	Y	Y	G	H	G	H	H	H	Y	H	Y	H	Y	H	G	H	H	H	G	Y
AX-183573760	I	79.38	Chr2	427360380	2.61e-29	chr2LG1	375068445			G	H	H	G	G	Y	H	-	G	H	H	H	Y	Y	Y	H	H	H	G	G	-	Y	G	H	G	H	G	H	Y	H	Y	H	-	H	G	H	H	H	G	Y
AX-183872225	I	79.38	Chr2	427501794	2.61e-29	chr2LG1	375162244			G	H	H	G	G	Y	H	G	G	H	H	H	-	Y	Y	H	H	H	G	G	Y	Y	G	H	G	H	H	H	Y	H	Y	H	-	H	G	H	H	H	G	Y
AX-183867375	I	79.38	Chr2	427505003	1.22e-27	chr2LG1	375165453			G	H	H	G	G	Y	H	G	G	H	H	H	Y	Y	Y	H	H	H	G	G	H	Y	G	H	G	H	H	H	Y	H	Y	H	H	H	G	H	H	H	G	Y
AX-183888973	I	79.38	Chr2	427521344	2.61e-29	chr2LG1	375181976			G	H	H	G	G	Y	H	G	G	H	H	H	Y	Y	Y	H	H	H	G	G	Y	Y	G	H	G	H	H	H	Y	H	Y	H	Y	H	G	H	H	H	G	Y
AX-183868720	I	79.38	Chr2	427521857	2.61e-29	chr2LG1	375182489			G	H	H	G	G	Y	H	G	G	H	H	H	Y	Y	Y	H	H	H	-	G	Y	Y	G	H	G	H	-	H	Y	H	Y	H	H	H	G	H	H	H	G	Y
AX-183866069	I	79.38	Chr2	427522033	1.22e-27	chr2LG1	375182665			G	H	H	G	G	Y	H	G	G	H	H	H	Y	Y	Y	H	H	H	G	G	Y	Y	G	H	G	H	-	H	Y	H	Y	H	Y	H	G	H	H	H	G	Y
AX-183573762	I	79.38	Chr2	427632237	2.61e-29	chr2LG1	374931222			G	H	H	G	G	Y	H	-	G	H	H	H	H	Y	Y	H	H	H	G	G	-	Y	G	H	G	H	H	H	Y	H	Y	H	Y	H	G	H	H	H	G	Y
AX-183564583	I	79.51	Chr2	428033827	2.61e-29	chr2LG1	374430793			G	H	H	G	G	Y	H	G	G	H	H	H	Y	Y	Y	H	H	H	G	G	Y	Y	G	H	G	H	H	H	Y	H	Y	H	H	H	G	H	H	H	G	Y
AX-183591225	I	79.63	Chr2	428075070	4.37e-27	chr2LG1	375577363			G	H	H	G	G	Y	H	G	G	H	H	H	Y	Y	Y	H	H	H	G	G	Y	Y	G	-	G	H	G	H	Y	-	Y	H	Y	H	G	H	H	H	G	Y
AX-183591224	I	79.75	Chr2	428083535	2.61e-29	chr2LG1	375508544			G	H	H	G	G	Y	H	G	G	H	H	H	Y	Y	Y	H	H	H	G	G	H	Y	G	H	G	H	H	H	Y	H	H	H	H	H	G	H	H	H	G	Y
AX-183877035	I	79.75	Chr2	428125585	2.61e-29	chr2LG1	375493912			G	H	H	G	G	Y	H	-	G	H	H	H	Y	Y	Y	H	H	H	G	G	H	Y	G	H	G	H	G	H	Y	H	Y	H	Y	H	G	H	H	H	G	Y
AX-183862537	I	79.75	Chr2	428128580	1.22e-27	chr2LG1	375490918			G	H	H	G	G	Y	H	G	G	H	H	H	Y	Y	Y	H	H	H	G	G	H	Y	G	H	G	H	-	H	Y	H	Y	H	Y	H	G	H	H	H	G	Y
AX-183573279	I	79.75	Chr2	428369729	2.61e-29	chr2LG1	375781676			G	H	H	G	G	Y	H	G	G	H	H	H	Y	Y	Y	H	H	H	G	G	H	Y	G	H	G	H	-	H	Y	H	Y	H	-	H	G	H	H	H	G	Y
AX-183591228	I	80	Chr2	428918204	2.61e-29	chr2LG1	375836025			G	H	H	G	G	Y	H	G	G	H	H	H	Y	Y	Y	H	H	H	G	G	Y	Y	G	H	G	H	H	H	Y	H	Y	H	Y	H	G	H	H	H	G	Y
AX-183881717	I	80	Chr2	428920720	2.61e-29	chr2LG1	375838546			G	H	H	G	G	Y	H	G	G	H	H	H	Y	Y	Y	H	H	H	G	G	Y	Y	G	H	G	H	G	H	Y	H	Y	H	Y	H	G	H	H	H	G	Y
AX-183591231	I	80.37	Chr2	429478090	1.22e-27	chr2LG1	376254956			G	H	H	G	G	Y	H	G	G	H	H	H	Y	Y	Y	H	H	H	G	G	Y	Y	G	H	G	H	G	H	Y	H	Y	H	Y	H	G	H	H	H	G	Y
AX-183591232	I	80.37	Chr2	429510390	1.22e-27	chr2LG1	376269073			G	H	H	G	G	Y	H	G	G	H	H	H	Y	Y	Y	H	H	H	G	G	Y	Y	G	H	G	H	H	H	Y	H	Y	H	-	H	G	H	H	H	G	Y
AX-183573281	I	80.37	Chr2	429513847	1.22e-27	chr2LG1	376272530			G	H	H	G	G	Y	H	G	G	H	H	H	Y	Y	Y	H	H	H	G	G	Y	Y	G	H	G	H	H	H	Y	H	Y	H	Y	H	G	H	H	H	G	Y
AX-183868521	I	80.37	Chr2	429513960	1.22e-27	chr2LG1	376272643			G	H	H	G	G	Y	H	G	G	H	H	H	Y	Y	Y	H	H	H	G	G	Y	Y	G	H	G	H	H	H	Y	H	Y	H	Y	H	G	H	H	H	G	Y
AX-183576264	I	80.37	Chr2	429640906	1.22e-27	chr2LG1	376407614			G	H	H	G	G	Y	H	G	G	H	H	H	Y	Y	Y	H	H	H	G	G	Y	Y	G	H	G	H	H	H	Y	H	Y	H	Y	H	G	H	H	H	G	Y
AX-183867656	I	80.37	Chr2	429809274	2.61e-29	chr2LG1	376658927			G	H	H	G	G	Y	H	G	G	H	H	H	Y	Y	Y	H	H	H	G	G	Y	Y	G	H	G	H	H	H	Y	H	Y	H	Y	H	G	H	H	H	G	Y
AX-183591239	I	80.37	Chr2	431014210	1.22e-27	chr2LG1	378005404			G	H	H	G	G	Y	H	G	G	H	H	H	Y	Y	Y	H	H	H	G	G	Y	Y	G	H	G	H	G	H	Y	H	Y	H	Y	H	G	H	H	H	G	Y
AX-183564588	I	80.5	Chr2	431016583	1.22e-27	chr2LG1	378007777			G	H	H	G	G	Y	H	G	G	H	H	H	Y	Y	Y	H	H	H	G	G	H	Y	G	H	G	H	-	H	Y	H	Y	H	-	H	G	H	H	H	G	Y
AX-183564590	I	80.5	Chr2	431210686	2.61e-29	chr2LG1	378197080			G	H	H	G	G	Y	H	G	G	H	H	H	Y	Y	Y	H	H	H	G	G	Y	Y	G	H	G	H	H	H	Y	H	Y	H	H	H	G	H	H	H	G	Y
AX-183564591	I	80.5	Chr2	431265720	2.61e-29	chr2LG1	378241346			G	H	H	G	G	Y	H	G	G	H	H	H	Y	Y	Y	H	H	H	G	G	H	Y	G	H	G	H	G	H	Y	H	-	H	H	H	G	H	H	H	G	Y
AX-183863099	I	80.62	Chr2	431411301	1.22e-27	chr2LG1	379324709			G	H	H	G	G	Y	H	-	G	H	H	H	Y	Y	Y	H	H	H	G	G	Y	Y	G	H	G	H	H	H	Y	H	Y	H	-	H	G	H	H	H	G	Y
AX-183632911	I	80.62	Chr2	431551745	1.22e-27	scaffold00674	14514			G	H	H	G	G	Y	H	G	G	H	H	H	Y	Y	Y	H	H	H	G	G	Y	Y	G	H	G	H	H	H	Y	H	Y	H	Y	H	G	H	H	H	G	Y
AX-183863516	I	80.75	Chr2	431553164	1.22e-27	scaffold00674	13091			G	H	H	G	G	Y	H	-	G	H	H	H	H	Y	Y	H	H	H	G	G	Y	Y	G	H	G	H	H	H	Y	H	Y	H	Y	H	G	H	H	H	G	Y
AX-183570733	I	80.75	Chr2	431573550	1.22e-27	chr2LG1	378645368			G	H	H	G	G	Y	H	G	G	H	H	H	Y	Y	Y	H	H	H	G	G	Y	Y	G	H	G	H	G	H	Y	H	Y	H	Y	H	G	H	H	H	G	Y
AX-183591250	I	80.99	Chr2	431913064	1.22e-27	chr2LG1	378446151			G	H	H	G	G	Y	H	H	G	H	H	H	Y	Y	Y	H	H	H	G	G	Y	Y	G	H	G	H	-	H	Y	H	Y	H	H	H	G	H	H	H	G	Y
AX-183591248	I	80.99	Chr2	431947059	2.61e-29	chr2LG1	378427923			G	H	H	G	G	Y	H	H	G	H	H	H	Y	Y	Y	H	H	H	G	G	Y	Y	G	H	G	H	H	H	Y	H	Y	H	Y	H	G	H	H	H	G	Y
AX-183576266	I	80.99	Chr2	431947374	1.22e-27	chr2LG1	378427608			G	H	H	G	G	Y	H	H	G	H	H	H	Y	Y	Y	H	H	H	G	G	-	Y	G	H	G	H	G	H	Y	H	Y	H	Y	H	G	H	H	H	G	Y
AX-183877036	I	80.99	Chr2	431948563	2.61e-29	chr2LG1	378426419			G	H	H	G	G	Y	H	H	G	H	H	H	Y	Y	Y	H	H	H	G	G	Y	Y	G	H	G	H	G	H	Y	H	Y	H	Y	H	G	H	H	H	G	Y
AX-183591276	I	80.99	Chr2	432314003	1.22e-27	chr2LG1	378928574			G	H	H	G	G	Y	H	H	G	H	H	H	Y	Y	Y	H	H	H	G	G	-	Y	G	H	G	H	H	H	Y	H	-	H	-	H	G	H	H	H	G	Y
AX-183868426	I	80.99	Chr2	432425438	2.61e-29	chr2LG1	378839420			G	H	H	G	G	Y	H	H	G	H	H	H	-	Y	Y	H	H	H	G	G	Y	Y	G	H	G	H	H	H	Y	H	Y	H	Y	H	G	H	H	H	G	Y
AX-183564595	I	80.99	Chr2	432451476	1.22e-27	chr2LG1	378810204			G	H	H	G	G	Y	H	H	G	H	H	H	Y	Y	Y	H	H	H	G	G	Y	Y	G	H	G	H	G	H	Y	H	Y	H	Y	H	G	H	H	H	G	Y
AX-183591275	I	80.99	Chr2	432451576	2.61e-29	chr2LG1	378810104			G	H	H	G	G	Y	H	H	G	H	H	H	Y	Y	Y	H	H	H	G	G	Y	Y	G	H	G	H	-	H	Y	H	Y	H	Y	H	G	H	H	H	G	Y
AX-183576271	I	80.99	Chr2	432523374	2.61e-29	chr2LG1	380408221			G	H	H	G	G	Y	H	H	G	H	H	H	Y	H	Y	H	H	H	G	G	Y	Y	G	-	G	H	H	H	Y	H	Y	H	H	H	G	H	H	H	G	Y
AX-183570731	I	80.99	Chr2	432621702	1.22e-27	chr2LG1	378496798			G	H	H	G	G	Y	H	H	G	H	H	H	Y	Y	Y	H	H	H	G	G	Y	Y	G	-	G	H	H	H	Y	H	Y	H	-	H	G	H	H	H	G	Y
AX-183591257	I	81.12	Chr2	432622763	1.22e-27	chr2LG1	378497859			G	H	H	G	G	Y	H	H	G	H	H	H	Y	Y	Y	H	H	H	G	G	Y	Y	G	H	G	H	G	H	Y	H	Y	H	Y	H	G	H	H	H	G	Y
AX-183591258	I	81.12	Chr2	432624163	2.61e-29	chr2LG1	378499260			G	H	H	G	G	Y	H	H	G	H	H	H	Y	Y	Y	H	H	H	G	G	-	Y	G	H	G	H	G	H	Y	H	Y	H	Y	H	G	H	H	H	G	Y
AX-183591273	I	81.12	Chr2	432837330	5.65e-26	chr2LG1	378598883			G	H	H	G	G	Y	H	H	G	H	H	H	Y	Y	Y	H	H	-	G	G	Y	Y	G	-	G	H	H	H	Y	H	Y	H	-	H	G	H	H	H	G	Y
AX-183591269	I	81.12	Chr2	432845540	5.65e-26	chr2LG1	378590702			G	H	H	G	G	Y	H	H	G	H	H	H	-	Y	-	H	H	H	G	G	-	Y	G	H	G	H	H	H	Y	H	Y	H	H	H	G	H	H	H	G	Y
AX-183881138	I	81.12	Chr2	432851569	5.65e-26	chr2LG1	378585000			G	H	H	G	G	Y	H	H	G	H	H	H	Y	Y	Y	H	H	H	G	G	Y	Y	G	H	G	H	H	H	Y	H	Y	H	Y	H	G	H	H	H	G	Y
AX-183881137	I	81.12	Chr2	432852091	5.65e-26	chr2LG1	378584478			G	H	H	G	G	Y	H	H	G	H	H	H	Y	Y	Y	H	H	H	G	G	-	Y	G	H	G	H	G	H	Y	H	Y	H	Y	H	G	H	H	H	G	Y
AX-183576269	I	81.24	Chr2	432853692	4.37e-27	chr2LG1	378582881			G	H	H	G	G	Y	H	H	G	H	H	H	Y	Y	-	H	H	H	G	G	-	Y	G	Y	G	H	H	H	Y	H	Y	H	Y	H	G	H	H	H	G	Y
AX-183591261	I	81.24	Chr2	432853756	1.22e-27	chr2LG1	378582817			G	H	H	G	G	Y	H	H	G	H	H	H	Y	Y	Y	H	H	H	-	G	-	Y	G	H	G	H	H	H	Y	H	Y	H	Y	H	G	H	H	H	G	Y
AX-183867349	I	81.24	Chr2	433302658	1.22e-27	scaffold02561	101500			G	H	H	G	G	Y	H	H	G	H	H	H	Y	Y	Y	H	H	H	G	G	H	Y	G	H	G	H	-	H	Y	H	Y	H	Y	H	G	H	H	H	G	Y
AX-183582388	I	81.24	Chr2	433303082	1.22e-27	scaffold02561	101076			G	H	H	G	G	Y	H	H	G	H	H	H	Y	Y	Y	H	H	H	G	G	Y	Y	G	H	G	H	H	H	Y	H	Y	H	Y	H	G	H	H	H	G	Y
AX-183872826	I	81.24	Chr2	433594382	2.61e-29	scaffold03765	79833			G	H	H	G	G	Y	H	H	G	H	H	H	Y	-	Y	H	H	H	G	G	H	Y	G	H	G	H	H	H	Y	H	Y	H	H	H	G	H	H	H	G	Y
AX-183580615	I	81.24	Chr2	434028087	1.22e-27	chr7LG7	409537326			G	H	H	G	G	Y	H	H	G	H	H	H	Y	Y	Y	H	H	H	G	G	-	Y	G	H	G	H	-	H	Y	H	Y	H	Y	H	G	H	H	H	G	Y
AX-183592437	I	81.24	Chr2	434053040	1.22e-27	chr2LG1	379456981			G	H	H	G	G	Y	H	H	G	H	H	H	Y	Y	Y	H	H	H	G	G	Y	Y	G	H	G	H	G	H	Y	H	Y	H	Y	H	H	H	H	H	G	Y
AX-183592438	I	81.24	Chr2	434055914	2.61e-29	chr2LG1	379459855			G	H	H	G	G	Y	H	H	G	H	H	H	Y	Y	Y	H	H	H	G	G	Y	Y	G	H	G	H	G	H	Y	H	Y	H	Y	H	G	H	H	H	G	Y
AX-183573349	I	81.24	Chr2	434059531	2.61e-29	chr2LG1	379463526			G	H	H	G	G	Y	H	H	G	H	H	H	Y	Y	Y	H	H	H	G	G	Y	Y	G	H	G	H	-	H	Y	H	Y	H	Y	H	G	H	H	H	G	Y
AX-183576464	I	81.24	Chr2	434060800	1.22e-27	chr2LG1	379464795			G	H	H	G	G	Y	H	H	G	H	H	H	Y	Y	Y	H	H	H	G	G	Y	Y	G	H	G	H	-	H	Y	H	Y	H	Y	H	G	H	H	H	G	Y
AX-183564598	I	82.24	Chr2	435742467	1.22e-27	chr2LG1	337170516			G	H	H	G	G	Y	H	H	G	H	H	H	Y	Y	Y	H	H	H	G	G	-	Y	G	H	G	H	G	H	Y	H	H	H	H	H	G	H	H	H	G	Y
AX-183867083	I	82.24	Chr2	435745754	2.61e-29	chr2LG1	337173785			G	H	H	G	G	Y	H	H	G	H	H	H	Y	Y	Y	H	H	H	G	G	Y	Y	G	H	G	H	G	H	Y	H	Y	H	Y	H	G	H	H	H	G	Y
AX-183889449	I	82.37	JAMSHJ010000223.1	83075	2.61e-29	chr2LG1	381345702			G	H	H	G	G	Y	H	H	G	H	H	H	Y	Y	Y	H	H	H	G	G	H	Y	G	H	G	H	G	H	Y	H	Y	H	Y	H	G	H	H	H	G	Y
AX-183866163	I	82.49	Chr2	436797910	2.61e-29	chr2LG1	381706224			G	H	H	G	G	Y	H	H	G	H	H	H	Y	Y	Y	H	H	H	G	G	Y	Y	G	H	G	H	H	H	Y	H	Y	H	H	H	G	H	H	H	G	Y
AX-183564615	I	82.61	Chr2	437142474	1.22e-27	chr2LG1	381997139			G	H	H	G	G	Y	H	H	G	H	H	H	Y	Y	Y	H	H	H	G	G	Y	Y	G	H	G	H	-	H	Y	H	Y	H	Y	H	G	H	H	H	G	Y
AX-183576293	I	82.61	Chr2	437151259	2.61e-29	chr2LG1	381988310			G	H	H	G	G	Y	H	H	G	H	H	H	Y	Y	Y	H	H	H	G	G	Y	Y	G	H	G	H	G	H	Y	H	Y	H	Y	H	G	H	H	H	G	Y
AX-183591301	I	82.74	Chr2	437537938	1.57e-26	chr2LG1	382212921			G	H	H	G	G	Y	H	Y	G	H	H	H	H	Y	Y	H	-	H	G	G	H	Y	G	H	G	H	H	H	Y	H	Y	H	H	H	G	H	H	H	G	Y
AX-183564607	I	82.74	Chr2	437553268	2.61e-29	chr2LG1	382248496			G	H	H	G	G	Y	H	H	G	H	H	H	Y	Y	Y	H	H	H	G	G	Y	Y	G	H	G	H	H	H	Y	H	Y	H	Y	H	G	H	H	H	G	Y
AX-183866070	I	82.74	Chr2	437559198	5.65e-26	chr2LG1	382254424			G	H	H	G	G	Y	H	H	G	H	H	H	Y	Y	Y	H	H	H	G	G	Y	Y	G	-	G	H	G	H	Y	H	Y	H	Y	H	G	H	H	H	G	Y
AX-183576275	I	82.74	Chr2	437778248	1.22e-27	chr2LG1	382309465			G	H	H	G	G	Y	H	H	G	H	H	H	Y	Y	Y	H	H	H	G	G	Y	Y	G	H	G	H	H	H	Y	H	Y	H	Y	H	G	H	H	H	G	Y
AX-183564609	I	82.74	Chr2	437782851	2.61e-29	chr2LG1	382314111			G	H	H	G	G	Y	H	H	G	H	H	H	Y	Y	Y	H	H	H	G	G	Y	Y	G	-	G	H	H	H	Y	H	Y	H	H	H	G	H	H	H	G	Y
AX-183591310	I	82.74	Chr2	437789917	5.65e-26	chr2LG1	382321176			G	H	H	G	G	Y	H	H	G	H	H	H	-	Y	Y	H	H	H	-	G	Y	Y	G	Y	G	H	H	H	Y	H	H	H	Y	H	G	H	H	H	G	Y
AX-183576277	I	82.86	Chr2	437793565	1.22e-27	chr2LG1	382324816			G	H	H	G	G	Y	H	H	G	H	H	H	Y	Y	Y	H	H	H	G	G	Y	Y	G	H	G	H	-	H	Y	H	Y	H	Y	H	G	H	H	H	G	Y
AX-183576278	I	82.86	Chr2	437807210	1.22e-27	chr2LG1	382337274			G	H	H	G	G	Y	H	H	G	H	H	H	Y	Y	Y	H	H	H	G	G	Y	Y	G	H	G	H	-	H	Y	H	Y	H	Y	H	G	H	H	H	G	Y
AX-183866269	I	82.86	Chr2	437812206	2.61e-29	chr2LG1	382342270			G	H	H	G	G	Y	H	H	G	H	H	H	Y	Y	Y	H	H	H	G	G	H	Y	G	H	G	H	G	H	Y	H	Y	H	Y	H	G	H	H	H	G	Y
AX-183872226	I	83.11	Chr2	438066590	1.22e-27	chr2LG1	382489859			G	H	H	G	G	Y	H	H	G	H	H	H	H	Y	Y	H	H	H	G	G	Y	Y	G	H	G	H	G	H	Y	H	Y	H	-	H	G	H	H	H	G	Y
AX-183576281	I	83.11	Chr2	438067757	1.22e-27	chr2LG1	382491025			G	H	H	G	G	Y	H	H	G	H	H	H	Y	Y	Y	H	H	H	G	G	Y	Y	G	H	G	H	H	H	Y	H	Y	H	H	H	G	H	H	H	G	Y
AX-183591319	I	83.11	Chr2	438068428	1.22e-27	chr2LG1	382491692			G	H	H	G	G	Y	H	H	G	H	H	H	Y	Y	Y	H	H	H	G	G	Y	Y	G	H	G	H	G	H	Y	H	Y	H	Y	H	G	H	H	H	G	Y
AX-183888568	I	83.11	Chr2	438069531	9.46e-24	chr2LG1	382492802			G	H	H	G	G	Y	H	H	G	H	H	H	Y	Y	Y	H	H	H	G	G	Y	Y	G	H	G	H	-	H	Y	H	Y	H	Y	H	G	H	H	H	G	Y
AX-183864930	I	83.11	Chr2	438070735	2.61e-29	chr2LG1	382494015			G	H	H	G	G	Y	H	H	G	H	H	H	Y	Y	Y	H	H	H	G	G	Y	Y	G	H	G	H	H	H	Y	H	Y	H	Y	H	G	H	H	H	G	Y
AX-183576282	I	83.11	Chr2	438169705	1.22e-27	chr2LG1	382590445			G	H	H	G	G	Y	H	H	G	H	H	H	-	Y	Y	H	H	H	G	G	H	Y	G	H	G	H	H	H	Y	H	Y	H	-	H	G	H	H	H	G	Y
AX-183861219	I	83.11	Chr2	438169948	2.61e-29	chr2LG1	382590688			G	H	H	G	G	Y	H	H	G	H	H	H	Y	Y	Y	H	H	H	G	G	Y	Y	G	H	G	H	-	H	Y	H	Y	H	Y	H	G	H	H	H	G	Y
AX-183879028	I	83.11	Chr2	438172635	1.22e-27	chr2LG1	382593376			G	H	H	G	G	Y	H	H	G	H	H	H	Y	Y	Y	H	H	H	G	G	Y	Y	G	H	G	H	H	H	Y	H	Y	H	Y	H	G	H	H	H	G	Y
AX-183591323	I	83.36	Chr2	438419088	1.22e-27	chr2LG1	382758493			G	H	H	G	G	Y	H	H	G	H	H	H	Y	Y	Y	H	H	H	-	G	Y	Y	G	H	G	H	-	H	Y	H	Y	H	Y	H	G	H	H	H	G	Y
AX-183882768	I	83.36	Chr2	438541640	1.22e-27	scaffold06666	432			G	H	H	G	G	Y	H	H	G	H	H	H	Y	Y	Y	H	H	H	G	G	Y	Y	G	H	G	H	H	H	Y	H	Y	H	Y	H	G	H	H	H	G	Y
AX-183637260	I	83.36	Chr2	438581410	2.61e-29	scaffold06666	6918			G	H	H	G	G	Y	H	H	G	H	H	H	Y	Y	Y	H	H	H	G	G	H	Y	G	H	G	H	H	H	Y	H	Y	H	Y	H	G	H	H	H	G	Y
AX-183576283	I	83.36	Chr2	438765704	2.61e-29	chr2LG1	382875198			G	H	H	G	G	Y	H	H	G	H	H	H	Y	Y	Y	H	H	H	G	G	Y	Y	G	H	G	H	H	H	Y	H	Y	H	Y	H	G	H	H	H	G	Y
AX-183860822	I	83.36	Chr2	438765907	1.22e-27	chr2LG1	382875401			G	H	H	G	G	Y	H	H	G	H	H	H	H	Y	Y	H	H	H	G	G	Y	Y	G	H	G	H	H	H	Y	H	Y	H	Y	H	G	H	H	H	G	Y
AX-183868886	I	83.36	Chr2	438807663	2.61e-29	chr2LG1	382701734			G	H	H	G	G	Y	H	H	G	H	H	H	Y	Y	Y	H	H	H	G	G	-	Y	G	H	G	H	G	H	Y	H	Y	H	Y	H	G	H	H	H	G	Y
AX-183882861	I	83.36	Chr2	438810913	1.22e-27	chr2LG1	382688037			G	H	H	G	G	Y	H	H	G	H	H	H	Y	Y	Y	H	H	H	G	G	-	Y	G	H	G	H	H	H	Y	H	Y	H	Y	H	G	H	H	H	G	Y
AX-183866991	I	83.73	Chr2	439189913	2.61e-29	chr2LG1	383244050			G	H	H	G	G	Y	H	H	G	H	H	H	Y	Y	Y	H	H	H	G	G	-	Y	G	H	G	H	H	H	Y	H	Y	H	Y	H	G	H	H	H	G	Y
AX-183576286	I	83.73	Chr2	439190190	2.61e-29	chr2LG1	383244327			G	H	H	G	G	Y	H	H	G	H	H	H	H	Y	Y	H	H	H	G	G	H	Y	G	H	G	H	H	H	Y	H	Y	H	-	H	G	H	H	H	G	Y
AX-183576287	I	83.73	Chr2	439272141	2.61e-29	chr2LG1	383330361			G	H	H	G	G	Y	H	H	G	H	H	H	Y	Y	Y	H	H	H	G	G	Y	Y	G	H	G	H	H	H	Y	H	-	H	Y	H	G	H	H	H	G	Y
AX-183564612	I	83.73	Chr2	439356937	2.61e-29	chr2LG1	383429796			G	H	H	G	G	Y	H	H	G	H	H	H	Y	Y	Y	H	H	H	-	G	-	Y	G	H	G	H	H	H	Y	H	Y	H	Y	H	G	H	H	H	G	Y
AX-183884439	I	84.1	Chr2	439456336	1.22e-27	chr2LG1	383585142			G	G	H	G	G	Y	H	H	G	H	H	H	-	Y	Y	H	H	H	G	G	H	Y	G	H	G	H	G	H	Y	H	Y	H	Y	H	G	H	H	H	G	Y
AX-183863860	I	84.1	Chr2	439460601	2.61e-29	chr2LG1	383589422			G	H	H	G	G	Y	H	H	G	H	H	H	Y	Y	Y	H	H	H	G	G	H	Y	G	H	G	H	G	H	Y	H	Y	H	Y	H	G	H	H	H	G	Y
AX-183564614	I	84.23	Chr2	439507724	2.61e-29	chr2LG1	383639943			G	H	H	G	G	Y	H	H	G	H	H	H	Y	Y	Y	H	H	H	G	G	H	Y	G	H	G	H	-	H	Y	H	Y	H	Y	H	G	H	H	H	G	Y
AX-183883901	I	84.23	Chr2	439509261	1.22e-27	chr2LG1	383641482			G	H	H	G	G	Y	H	H	G	H	H	H	H	Y	Y	H	H	H	G	G	H	Y	G	H	G	H	H	H	Y	H	Y	H	Y	H	G	H	H	H	G	Y
AX-183891239	I	84.23	Chr2	439581656	1.22e-27	chr2LG1	383733950			G	H	H	G	G	Y	H	H	G	H	H	H	-	Y	Y	H	H	H	G	G	-	Y	G	-	G	H	G	H	Y	H	Y	H	H	H	G	H	H	H	G	Y
AX-183864269	I	84.48	Chr2	439870458	1.22e-27	chr2LG1	383972059			G	H	H	G	G	Y	H	H	G	H	H	H	-	Y	Y	H	H	H	G	G	H	Y	G	H	G	H	G	H	Y	H	Y	H	-	H	G	H	H	H	G	Y
AX-183576290	I	84.48	Chr2	439870529	1.22e-27	chr2LG1	383972130			G	H	H	G	G	Y	H	H	G	H	H	H	Y	Y	Y	H	H	H	G	G	Y	Y	G	H	G	H	H	H	Y	H	Y	H	Y	H	G	H	H	H	G	Y
AX-183638384	I	84.48	Chr2	439941759	2.61e-29	chr2LG1	384057162			G	H	H	G	G	Y	H	H	G	H	H	H	Y	Y	Y	H	H	H	G	G	H	Y	G	-	G	H	-	H	Y	H	Y	H	-	H	G	H	H	H	G	Y
AX-183570744	I	84.48	Chr2	439955835	5.65e-26	chr2LG1	384074028			G	H	H	G	G	Y	H	H	G	H	H	H	Y	Y	Y	H	H	H	G	G	H	Y	G	H	G	H	G	H	Y	H	Y	H	H	H	G	H	H	H	G	Y
AX-183591352	I	84.48	Chr2	440358187	5.65e-26	chr2LG1	384280881			G	H	H	G	G	Y	H	H	G	H	H	H	Y	Y	Y	H	H	H	G	G	Y	Y	G	H	G	H	-	H	Y	H	Y	H	Y	H	G	H	H	H	G	Y
AX-183570745	I	84.6	Chr2	440426218	2.61e-29	chr2LG1	384299044			G	H	H	G	G	Y	H	H	G	H	H	H	Y	Y	Y	H	H	H	G	G	Y	Y	G	H	G	H	H	H	Y	H	Y	H	Y	H	G	H	H	H	G	Y
AX-183591353	I	84.6	Chr2	440426643	1.22e-27	chr2LG1	384299470			G	H	H	G	G	Y	H	H	G	H	H	H	Y	Y	-	H	H	H	G	G	H	Y	G	H	G	H	H	H	Y	H	Y	H	-	H	G	H	H	H	G	Y
AX-183570748	I	84.72	Chr2	440514514	2.61e-29	chr2LG1	384532294			G	H	H	G	G	Y	H	H	G	H	H	H	Y	Y	Y	H	H	H	G	G	-	Y	G	H	G	H	H	H	Y	H	Y	H	Y	H	G	H	H	H	G	Y
AX-183570747	I	84.72	Chr2	440515663	5.65e-26	chr2LG1	384531157			G	H	H	G	G	Y	H	H	G	H	H	H	Y	Y	Y	H	H	H	G	G	Y	Y	G	H	G	H	H	H	Y	H	Y	H	Y	H	G	H	H	H	G	Y
AX-183573289	I	85.1	Chr2	441211206	5.65e-26	chr2LG1	384789622			G	H	H	G	G	Y	Y	H	G	H	H	H	Y	Y	Y	H	H	H	G	G	H	-	G	H	G	H	H	H	Y	H	Y	H	H	H	G	H	H	H	G	Y
AX-183591378	I	85.34	Chr2	441722908	2.61e-29	chr2LG1	385265526			G	H	H	G	G	Y	Y	H	G	H	H	H	Y	Y	Y	H	H	H	G	G	H	Y	G	H	G	H	H	H	Y	H	Y	H	Y	H	G	H	H	H	G	Y
AX-183564619	I	85.34	Chr2	441934035	2.61e-29	chr2LG1	385452895			G	H	H	G	G	Y	Y	H	G	H	H	H	Y	Y	Y	H	H	H	G	G	H	Y	G	H	G	H	G	H	Y	H	Y	H	Y	H	G	H	H	H	G	Y
AX-183862210	I	85.59	Chr2	442058083	2.61e-29	chr2LG1	385707011			G	H	H	G	G	Y	Y	H	G	H	H	H	Y	Y	Y	H	H	H	G	G	Y	Y	G	H	G	H	-	H	Y	H	Y	H	Y	H	G	H	H	H	G	Y
AX-183591392	I	85.72	Chr2	442215004	1.22e-27	chr2LG1	385843002			G	H	H	G	G	Y	Y	H	G	H	H	H	Y	Y	Y	H	H	H	G	G	Y	Y	G	H	G	H	H	H	Y	H	Y	H	Y	H	G	H	H	H	G	Y
AX-183591393	I	85.72	Chr2	442215521	1.22e-27	chr2LG1	385843519			G	H	H	G	G	Y	Y	H	G	H	H	H	Y	Y	Y	H	H	H	G	G	Y	Y	G	H	G	H	G	H	Y	H	Y	H	Y	H	G	H	H	H	G	Y
AX-183564626	I	85.96	Chr2	442638914	2.61e-29	chr2LG1	386252844			G	H	H	G	G	Y	Y	H	G	H	H	H	Y	Y	Y	H	H	H	G	G	H	Y	G	H	G	H	-	H	Y	H	Y	H	Y	H	G	H	H	H	H	Y
AX-183879544	I	86.09	Chr2	442679931	2.03e-25	chr2LG1	386294077			G	H	H	G	G	Y	Y	H	G	H	H	H	Y	Y	Y	H	H	H	G	G	H	Y	G	H	G	H	G	H	Y	H	Y	H	Y	H	G	H	H	H	H	Y
AX-183564628	I	86.46	Chr2	443419127	1.22e-27	chr2LG1	386542206			G	H	H	G	G	Y	Y	H	G	H	H	H	Y	Y	Y	H	H	H	G	G	H	Y	G	H	G	H	G	H	Y	H	Y	H	-	H	G	H	H	H	H	Y
AX-183574918	I	86.46	Chr2	443425321	1.22e-27	chr2LG1	386536012			G	H	H	G	G	Y	Y	H	G	H	H	H	-	Y	Y	H	H	H	G	G	H	Y	G	H	G	H	G	H	Y	H	Y	H	H	H	G	H	H	H	H	Y
AX-183873566	I	86.46	Chr2	443463607	2.61e-29	chr2LG1	386497975			G	H	H	G	G	Y	Y	H	G	H	H	H	Y	Y	Y	H	G	H	G	G	H	Y	G	-	G	H	G	H	Y	H	Y	H	-	H	G	H	H	H	H	Y
AX-183889819	I	86.46	Chr2	443587699	2.61e-29	scaffold03997	53745			G	H	H	G	G	Y	Y	H	G	H	H	H	Y	Y	Y	H	H	H	G	G	H	Y	G	H	G	H	G	H	Y	H	Y	H	-	H	G	H	H	H	H	Y
AX-183636599	I	86.46	Chr2	443593596	1.22e-27	scaffold03997	48109			G	H	H	G	G	Y	Y	H	G	H	H	H	Y	Y	Y	H	H	H	G	G	H	Y	G	H	G	H	G	H	Y	H	Y	H	Y	H	G	H	H	H	H	Y
AX-183869809	I	86.46	Chr2	443594195	1.22e-27	scaffold03997	47510			G	H	H	G	G	Y	Y	H	G	H	H	H	Y	Y	Y	H	H	H	G	G	H	Y	G	H	G	H	G	H	Y	H	Y	H	Y	H	G	H	H	H	H	Y
AX-183580874	I	86.46	Chr2	443660019	2.61e-29	scaffold00765	168865			G	H	H	G	G	Y	Y	-	G	H	H	H	Y	Y	Y	H	H	H	G	G	H	Y	G	G	G	H	-	H	Y	H	Y	H	Y	H	G	H	H	H	H	Y
AX-183633003	I	86.46	Chr2	443719773	2.61e-29	scaffold00765	108948			G	H	H	G	G	Y	Y	H	G	H	H	H	Y	Y	Y	H	H	H	G	G	H	Y	G	H	G	H	G	H	Y	H	Y	H	Y	H	G	H	H	H	H	Y
AX-183864201	I	86.58	Chr2	444037930	1.22e-27	chr2LG1	387066291			G	H	H	G	G	Y	Y	H	G	G	H	H	Y	Y	Y	H	H	H	G	G	H	Y	G	H	G	H	H	H	Y	H	Y	H	Y	H	G	H	H	H	H	Y
AX-183591424	I	86.58	Chr2	444039007	1.22e-27	chr2LG1	387067368			G	H	H	G	G	Y	Y	H	G	G	H	H	Y	Y	Y	H	H	H	G	G	H	Y	G	H	G	H	-	H	Y	H	Y	H	Y	H	G	H	H	H	H	Y
AX-183894889	I	86.58	Chr2	444039838	1.22e-27	chr2LG1	387068199			G	H	H	G	G	Y	Y	H	G	G	H	H	Y	Y	Y	H	H	H	G	G	H	Y	G	H	G	H	H	H	Y	H	Y	H	Y	H	G	H	H	H	H	Y
AX-183591429	I	87.08	Chr2	444544429	2.61e-29	chr2LG1	387553232			G	H	H	G	G	Y	Y	H	G	G	H	H	Y	Y	Y	H	H	H	G	G	H	Y	G	H	G	Y	G	H	Y	H	Y	H	Y	H	G	H	H	H	H	Y
AX-183883396	I	87.08	Chr2	444552526	1.22e-27	chr2LG1	387561548			G	H	H	G	G	Y	Y	H	G	G	H	H	H	Y	Y	H	H	H	G	G	H	Y	G	H	G	Y	-	H	Y	H	Y	H	Y	H	G	H	H	H	H	Y
AX-183866270	I	87.08	Chr2	444582415	2.61e-29	chr2LG1	387591740			G	H	H	G	G	Y	Y	H	G	G	H	H	Y	Y	Y	H	H	H	G	G	H	Y	G	H	G	Y	G	H	Y	H	Y	H	Y	H	G	H	H	H	H	Y
AX-183564630	I	87.21	Chr2	445358110	2.61e-29	chr2LG1	388380407			G	H	H	G	G	Y	Y	H	G	G	H	H	Y	Y	Y	H	H	H	G	G	H	H	G	H	G	Y	G	H	Y	H	Y	H	Y	H	G	H	H	H	H	Y
AX-183576305	I	87.33	Chr2	445360885	1.22e-27	chr2LG1	388383018			G	H	H	G	G	Y	Y	H	G	G	H	H	Y	Y	Y	H	H	H	G	G	H	H	G	H	G	Y	G	H	Y	H	Y	H	H	H	G	H	H	H	H	Y
AX-183874725	I	87.33	Chr2	445474758	1.22e-27	chr2LG1	388468225			G	H	H	G	G	Y	Y	H	G	G	H	H	Y	Y	Y	H	H	H	H	G	H	H	G	H	G	Y	G	H	Y	H	Y	H	H	H	G	H	H	H	H	Y
AX-183564632	I	87.33	Chr2	445475087	1.22e-27	chr2LG1	388468554			G	H	H	G	G	Y	Y	H	G	G	H	H	Y	Y	Y	H	H	H	G	G	H	H	G	H	G	Y	H	H	Y	H	Y	H	Y	H	G	H	H	H	H	Y
AX-183864630	I	87.33	Chr2	445475194	1.22e-27	chr2LG1	388468661			G	H	H	G	G	Y	Y	H	G	G	H	H	Y	Y	Y	H	H	H	G	G	H	H	G	H	G	Y	-	H	Y	H	Y	H	Y	H	G	H	H	H	H	Y
AX-183570754	I	87.33	Chr2	445475341	2.61e-29	chr2LG1	388468808			G	H	H	G	G	-	Y	H	G	G	H	H	Y	Y	Y	H	H	H	G	G	H	H	G	H	G	Y	H	H	Y	H	Y	H	Y	H	G	H	H	H	H	Y
AX-183873935	I	87.33	Chr2	445475838	1.22e-27	chr2LG1	388469305			G	H	H	G	G	Y	Y	H	G	G	H	H	Y	Y	Y	H	H	H	G	G	H	H	G	H	G	Y	H	H	Y	H	Y	H	Y	H	G	H	H	H	H	Y
AX-183864263	I	87.33	Chr2	445682981	2.61e-29	chr2LG1	388540705			G	H	H	G	G	Y	Y	H	G	G	H	H	Y	Y	Y	H	H	H	G	G	H	H	G	H	G	Y	H	H	Y	H	Y	H	Y	H	G	H	H	H	H	Y
AX-183863976	I	87.33	Chr2	445867194	5.65e-26	chr2LG1	388700554			G	H	H	G	G	Y	Y	H	G	G	H	H	Y	Y	Y	H	H	H	G	G	H	H	G	H	G	Y	H	H	Y	H	Y	H	Y	H	G	H	H	H	H	Y
AX-183573301	I	87.33	Chr2	446112490	1.22e-27	chr2LG1	389043779			G	H	H	G	G	Y	Y	H	G	G	H	H	Y	Y	Y	H	H	H	G	G	H	H	G	H	G	Y	-	H	Y	H	Y	H	Y	H	G	H	H	H	H	Y
AX-183591448	I	87.33	Chr2	446114719	2.61e-29	chr2LG1	389045993			G	H	H	G	G	Y	Y	H	G	G	H	H	Y	Y	Y	H	H	H	G	G	H	H	G	H	G	Y	G	H	Y	H	Y	H	Y	H	G	H	H	H	H	Y
AX-183867626	I	87.33	Chr2	446145950	1.22e-27	chr2LG1	389074306			G	H	H	G	G	Y	Y	H	G	G	H	H	Y	Y	Y	H	H	H	G	G	H	H	G	H	G	Y	H	H	Y	H	-	H	Y	H	G	H	H	H	H	Y
AX-183861680	I	87.33	Chr2	446146112	1.22e-27	chr2LG1	389074468			G	H	H	G	G	Y	Y	H	G	G	H	H	Y	Y	Y	H	H	H	G	G	H	H	G	H	G	Y	-	H	Y	H	Y	H	Y	H	G	H	H	H	H	Y
AX-183874315	I	87.7	Chr2	446435157	2.61e-29	chr2LG1	389390383			G	H	H	G	G	Y	Y	H	G	G	H	H	Y	Y	Y	H	H	H	G	G	H	H	G	H	G	Y	G	H	Y	H	Y	H	Y	H	G	H	H	H	H	Y
AX-183868389	I	87.95	Chr2	446524005	1.22e-27	chr2LG1	389468633			G	H	H	G	G	Y	Y	H	G	G	H	H	Y	Y	Y	H	H	H	G	G	H	H	G	H	G	Y	H	H	Y	H	Y	Y	Y	H	G	H	H	Y	H	Y
AX-183570755	I	88.32	Chr2	446901035	1.22e-27	chr2LG1	389815191			G	H	H	G	G	Y	Y	H	G	G	H	H	Y	Y	Y	H	H	H	G	G	H	H	G	H	G	Y	H	H	Y	H	Y	Y	Y	H	G	H	H	Y	H	Y
AX-183861430	I	88.45	Chr2	447090785	1.22e-27	chr2LG1	390000983			G	H	H	G	G	Y	Y	H	G	G	H	H	Y	Y	Y	H	H	Y	G	G	H	H	G	H	G	Y	-	H	Y	H	Y	Y	Y	H	G	H	H	Y	H	Y
AX-183591463	I	88.45	Chr2	447133050	2.61e-29	chr2LG1	390039103			G	H	H	G	G	Y	Y	H	G	G	H	H	Y	Y	Y	H	H	H	G	G	H	H	G	-	G	Y	G	H	Y	H	Y	Y	Y	H	G	H	H	Y	H	Y
AX-183591478	I	88.94	Chr2	447644251	1.22e-27	chr2LG1	390565759			G	H	H	G	G	Y	Y	H	G	G	H	H	Y	Y	Y	H	H	H	G	G	H	H	G	H	G	Y	G	H	Y	H	Y	Y	H	H	G	H	H	Y	H	Y
AX-183592478	I	89.07	Chr2	447999823	1.22e-27	chr2LG1	391332656			G	H	H	G	G	Y	Y	H	G	G	H	H	Y	Y	Y	H	H	H	G	G	H	H	G	H	G	Y	-	H	Y	H	Y	Y	Y	H	G	H	H	Y	H	Y
AX-183564650	I	89.69	Chr2	448317904	2.61e-29	chr2LG1	391150078			G	H	H	G	G	Y	Y	H	G	G	H	H	Y	Y	Y	H	H	H	G	G	H	H	G	H	G	Y	G	H	Y	H	Y	Y	H	H	G	H	H	Y	H	Y
AX-183876948	I	90.06	Chr2	448649045	5.65e-26	super-scaffold4985	39640			G	H	H	G	G	Y	Y	H	G	G	H	H	Y	Y	Y	H	H	H	G	G	H	H	G	H	G	Y	-	H	Y	H	Y	Y	Y	H	G	H	H	Y	H	Y
AX-183888027	I	90.06	Chr2	448676097	1.22e-27	super-scaffold4985	28400			G	H	H	G	G	Y	Y	H	G	G	H	H	Y	Y	Y	-	H	-	G	G	H	H	G	H	G	Y	G	H	Y	-	H	Y	Y	H	G	H	H	Y	H	Y
AX-183564648	I	90.06	Chr2	449185592	1.22e-27	chr2LG1	391669280			G	H	H	G	G	Y	Y	H	G	G	H	H	Y	Y	Y	H	H	H	G	G	H	H	G	H	G	Y	G	H	Y	H	Y	Y	Y	H	G	H	H	Y	H	Y
AX-183862957	I	90.06	Chr2	449185988	2.63e-24	chr2LG1	391669676			G	-	H	G	G	Y	Y	H	G	G	H	H	Y	Y	Y	H	H	H	G	G	H	H	G	H	G	-	G	H	Y	H	Y	Y	H	H	G	H	H	Y	H	Y
AX-183576315	I	90.06	Chr2	449222004	1.22e-27	chr2LG1	391775647			G	H	H	G	G	Y	Y	H	G	G	H	H	Y	Y	Y	H	H	H	G	G	H	H	G	H	G	Y	G	H	Y	H	Y	Y	Y	H	G	H	H	Y	H	Y
AX-183573306	I	90.06	Chr2	449222474	2.61e-29	chr2LG1	391776117			G	H	H	G	G	Y	Y	H	G	G	H	H	Y	Y	Y	H	H	H	G	G	H	H	G	H	G	Y	G	H	Y	H	Y	Y	Y	H	G	H	H	Y	H	Y
AX-183564643	I	90.19	Chr2	449224011	1.22e-27	chr2LG1	391777663			G	H	H	G	G	Y	Y	H	G	G	H	H	Y	Y	Y	H	H	H	G	G	H	H	G	H	G	Y	-	H	Y	H	Y	Y	-	H	G	H	H	Y	H	Y
AX-183570758	I	90.94	Chr2	450875650	1.59e-16	chr2LG1	393501062			G	H	H	G	G	Y	Y	H	G	G	H	H	Y	Y	Y	H	H	H	G	G	H	H	H	H	G	Y	G	H	Y	H	-	Y	Y	H	G	H	H	Y	H	Y
AX-183570759	I	90.94	Chr2	450757399	5.73e-16	chr2LG1	393501360			G	H	H	G	G	Y	Y	H	G	G	H	H	Y	Y	Y	H	H	H	G	G	H	H	H	H	G	Y	-	H	Y	H	Y	Y	-	H	G	H	H	Y	H	Y
AX-183867252	I	91.06	Chr2	451531249	2.63e-24	chr2LG1	394127253			G	H	H	G	G	Y	Y	H	G	G	H	H	Y	Y	Y	H	H	H	G	G	H	H	H	H	G	Y	-	H	Y	H	Y	Y	-	H	G	H	H	Y	H	Y
AX-183576324	I	91.06	Chr2	451566720	1.22e-27	chr2LG1	394163558			G	H	H	G	G	Y	Y	H	G	G	H	H	Y	Y	Y	H	H	H	-	G	H	H	H	H	G	Y	G	H	Y	H	Y	Y	-	H	G	H	H	Y	H	Y
AX-183868109	I	91.06	Chr2	451804572	2.63e-24	chr2LG1	394774055			G	H	H	G	G	Y	Y	H	G	G	H	H	Y	Y	Y	H	H	H	G	G	H	H	H	H	G	Y	G	H	Y	H	Y	Y	Y	H	G	H	H	Y	H	Y
AX-183564659	I	91.06	Chr2	451804744	2.61e-29	chr2LG1	394773883			G	H	H	G	G	Y	Y	H	G	G	H	H	H	Y	Y	H	H	H	G	G	H	H	H	H	G	Y	G	H	Y	H	Y	Y	-	H	G	H	H	Y	H	Y
AX-183867221	I	91.68	Chr2	453414893	1.22e-27	scaffold00173	74478			G	H	H	G	G	Y	Y	H	G	G	H	H	-	Y	Y	H	H	H	G	G	H	H	H	H	G	Y	G	H	Y	H	Y	Y	-	H	G	H	H	Y	H	Y
AX-183580849	I	91.68	Chr2	453415028	2.61e-29	scaffold00173	74613			G	H	H	G	G	Y	Y	H	G	G	H	H	-	Y	Y	H	H	H	G	G	H	H	H	H	G	Y	-	H	Y	H	Y	Y	-	H	G	H	H	Y	H	Y
AX-183576326	I	91.68	Chr2	453566299	1.22e-27	chr2LG1	395883701			G	-	H	G	G	Y	Y	H	G	G	H	H	Y	Y	Y	H	H	H	G	G	H	H	H	H	G	Y	G	H	Y	-	Y	Y	Y	H	G	H	H	Y	H	Y
AX-183863998	I	91.68	Chr2	453569613	2.61e-29	chr2LG1	395880401			G	H	H	G	G	Y	Y	H	G	G	H	H	-	Y	Y	H	H	H	G	G	H	H	H	H	G	Y	-	H	Y	H	Y	Y	-	H	G	H	H	Y	H	Y
AX-183866598	I	92.06	Chr2	453886521	5.65e-26	chr2LG1	396177103			G	H	H	G	G	Y	Y	H	G	G	H	H	Y	Y	Y	H	H	H	G	G	H	H	H	H	G	Y	G	H	Y	H	Y	Y	Y	H	G	H	H	Y	H	Y
AX-183591533	I	92.06	Chr2	453889589	5.65e-26	chr2LG1	396180152			G	H	H	G	G	Y	Y	H	G	G	H	H	Y	Y	Y	H	H	H	G	G	H	H	H	H	G	Y	G	H	Y	H	Y	Y	Y	H	G	H	H	Y	H	Y
AX-183591535	I	92.06	Chr2	453902604	1.22e-27	chr2LG1	396188137			G	H	H	G	G	Y	Y	H	G	G	H	H	Y	Y	Y	H	H	H	G	G	H	H	H	H	G	Y	G	H	Y	H	Y	Y	H	H	G	H	H	Y	H	Y
AX-183576331	I	92.06	Chr2	453905030	2.61e-29	chr2LG1	396190568			G	H	H	G	G	Y	Y	H	G	G	H	H	Y	Y	Y	H	H	H	G	G	H	H	H	H	G	Y	G	H	Y	H	Y	Y	Y	H	G	H	H	Y	H	Y
AX-183576332	I	92.06	Chr2	453908205	1.22e-27	chr2LG1	396193751			G	H	H	G	G	Y	Y	H	G	G	H	H	Y	Y	Y	H	H	H	G	G	H	H	H	H	G	Y	G	H	Y	H	Y	Y	Y	H	G	H	H	Y	H	Y
AX-183861164	I	92.06	Chr2	453908634	2.61e-29	chr2LG1	396194180			G	H	H	G	G	Y	Y	H	G	G	H	H	Y	Y	Y	H	H	H	G	G	H	H	H	H	G	Y	G	H	Y	H	Y	Y	Y	H	G	H	H	Y	H	Y
AX-183860816	I	92.06	Chr2	454178404	1.22e-27	chr2LG1	396391893			G	H	H	G	G	Y	Y	H	G	G	H	H	-	Y	Y	H	H	H	G	G	H	H	H	-	G	Y	-	H	Y	H	Y	Y	H	H	G	H	-	Y	H	Y
AX-183634756	I	92.55	Chr2	455056278	2.61e-29	scaffold02215	209462			G	H	H	G	G	H	Y	H	G	G	H	H	Y	Y	Y	G	H	H	G	G	H	H	H	H	G	Y	G	H	Y	H	Y	Y	-	H	G	Y	H	Y	H	Y
AX-183564662	I	92.68	Chr2	455677944	2.61e-29	chr2LG1	396878182			G	H	H	G	G	H	Y	H	G	G	H	H	Y	Y	Y	G	H	H	G	G	H	H	Y	H	G	Y	G	H	Y	H	Y	Y	Y	H	G	Y	H	Y	H	Y
AX-183868019	I	93.3	Chr2	456758811	1.22e-27	chr2LG1	397828725			G	H	H	G	G	H	Y	H	G	G	H	H	Y	Y	Y	G	H	H	G	-	H	H	Y	H	G	Y	G	H	Y	H	Y	Y	Y	H	G	Y	H	Y	H	Y
AX-183591550	I	93.3	Chr2	456783346	2.61e-29	chr2LG1	397840147			G	H	H	G	G	H	Y	H	G	G	H	H	H	Y	Y	G	H	H	G	G	H	H	Y	H	G	Y	G	H	Y	H	Y	Y	Y	H	G	Y	H	Y	H	Y
AX-183878490	I	93.3	Chr2	456800770	1.22e-27	chr2LG1	397888824			G	H	H	G	G	H	Y	H	G	G	H	H	-	Y	Y	G	H	H	G	G	H	H	Y	H	G	Y	G	H	Y	H	Y	Y	-	H	G	Y	H	Y	H	Y
AX-183564667	I	93.3	Chr2	456803242	1.22e-27	chr2LG1	397891295			G	H	H	G	G	H	Y	H	G	G	H	H	Y	Y	Y	G	H	H	G	G	H	H	Y	H	G	Y	G	H	Y	H	Y	Y	Y	H	G	Y	H	Y	H	Y
AX-183874316	I	93.3	Chr2	456810064	1.22e-27	chr2LG1	397898116			G	H	H	G	G	H	Y	H	G	G	H	H	Y	Y	Y	G	H	H	G	G	H	H	Y	H	G	Y	-	H	Y	H	Y	Y	-	H	G	Y	H	Y	H	Y
AX-183872896	I	94.42	Chr2	457500517	2.61e-29	chr2LG1	398502332			G	G	H	G	G	H	Y	H	G	G	H	H	Y	Y	Y	G	H	H	G	G	H	H	Y	H	G	Y	G	H	H	H	Y	Y	Y	H	G	Y	H	Y	H	Y
AX-183564670	I	94.42	Chr2	457630193	1.22e-27	chr2LG1	398628897			G	H	H	G	G	H	Y	H	G	G	H	H	Y	Y	Y	G	H	H	G	G	H	H	Y	H	G	Y	G	H	H	H	Y	Y	Y	H	G	Y	H	Y	H	Y
AX-183591568	I	94.42	Chr2	457647501	1.22e-27	chr2LG1	398650486			G	H	H	G	G	H	Y	H	G	G	H	H	Y	Y	Y	G	H	H	G	G	H	H	Y	H	G	Y	-	H	H	H	Y	Y	-	H	G	Y	H	Y	H	Y
AX-183573775	I	94.42	Chr2	457649089	1.22e-27	chr2LG1	398652074			G	H	H	G	G	H	Y	H	G	G	H	H	Y	Y	Y	G	H	H	G	G	H	H	Y	H	G	Y	G	H	H	H	Y	Y	Y	H	G	Y	H	Y	H	Y
AX-183886041	I	94.55	Chr2	457722754	5.65e-26	chr2LG1	398771328			G	H	H	G	G	H	Y	H	G	G	H	H	Y	Y	Y	G	H	H	G	G	H	H	Y	H	G	Y	H	H	H	H	Y	Y	Y	H	G	Y	H	Y	H	Y
AX-183576334	I	94.67	Chr2	458755081	1.22e-27	chr2LG1	399372721			G	H	H	G	G	H	Y	H	G	G	H	H	-	Y	Y	G	H	H	G	G	H	H	Y	H	G	Y	G	H	H	H	Y	Y	Y	H	G	Y	H	Y	H	Y
AX-183591584	I	94.92	Chr2	459265225	5.65e-26	chr2LG1	400027832			G	H	H	G	G	H	Y	H	G	G	H	H	-	Y	Y	G	H	H	G	G	H	H	Y	H	G	Y	G	H	H	H	Y	Y	Y	H	G	Y	H	Y	H	Y
AX-183866539	I	94.92	Chr2	459266605	2.61e-29	chr2LG1	400029210			G	H	H	G	G	H	Y	H	G	G	H	H	-	Y	Y	G	H	H	G	G	H	H	Y	H	G	Y	G	H	H	H	Y	Y	Y	H	G	Y	H	Y	H	Y
AX-183881724	I	95.04	Chr2	459620921	2.61e-29	chr2LG1	400357088			G	H	H	G	G	H	Y	H	G	G	H	H	Y	Y	Y	G	H	H	G	G	H	H	Y	H	G	Y	G	H	H	H	Y	Y	Y	H	G	Y	H	Y	H	Y
AX-183592602	I	95.54	Chr2	460034530	1.22e-27	chr2LG1	402386779			G	H	H	G	G	H	Y	H	G	G	H	H	Y	Y	Y	G	H	H	G	G	H	H	Y	H	G	Y	G	H	H	H	Y	Y	Y	H	G	Y	H	Y	H	Y
AX-183576487	I	95.66	Chr2	460273386	1.22e-27	chr2LG1	402489191			G	H	H	G	G	H	Y	H	G	G	H	H	H	Y	Y	G	H	H	G	G	H	H	Y	H	G	Y	H	H	H	H	Y	Y	H	H	G	Y	H	Y	H	Y
AX-183860616	I	95.66	Chr2	460274744	2.61e-29	chr2LG1	402490553			G	H	H	G	G	H	Y	H	G	G	H	H	Y	Y	Y	G	H	H	G	G	H	H	Y	H	G	Y	H	H	H	H	Y	Y	Y	H	G	Y	H	Y	H	Y
AX-183591638	I	96.16	Chr2	460996274	2.61e-29	chr2LG1	403094709			G	H	H	G	G	H	Y	H	G	G	H	H	Y	H	Y	G	H	H	G	G	H	H	Y	H	G	Y	-	H	H	H	Y	Y	Y	H	G	Y	Y	Y	H	Y
AX-183890370	I	96.29	Chr2	461389236	2.61e-29	chr2LG1	402030434			G	H	H	G	G	H	Y	H	G	G	H	H	Y	H	Y	G	H	H	G	G	H	H	Y	H	G	Y	G	H	H	H	Y	Y	Y	H	G	Y	Y	Y	H	Y
AX-183576341	I	96.41	Chr2	461437306	2.61e-29	chr2LG1	402078389			G	H	H	G	G	H	Y	H	G	G	H	H	Y	H	Y	G	H	H	G	G	H	H	Y	H	G	Y	H	H	H	G	Y	Y	Y	H	G	Y	Y	Y	H	Y
AX-183570765	I	96.41	Chr2	461440133	2.61e-29	chr2LG1	402081817			G	H	H	G	G	H	Y	H	G	G	H	H	-	H	Y	G	H	H	G	G	H	H	Y	H	G	Y	H	H	H	H	H	Y	Y	H	G	Y	Y	Y	H	Y
AX-183591621	I	96.41	Chr2	461464499	2.61e-29	chr2LG1	402106140			G	H	H	G	G	H	Y	H	G	G	H	H	Y	H	Y	G	H	H	G	G	H	H	Y	H	G	Y	H	H	H	H	Y	Y	Y	H	G	Y	Y	Y	H	Y
AX-183576342	I	96.41	Chr2	461569789	2.61e-29	chr2LG1	402200307			G	H	H	G	G	H	Y	H	G	G	H	H	Y	H	Y	G	H	H	G	G	H	H	Y	H	G	Y	-	H	H	H	Y	Y	Y	H	G	Y	Y	Y	H	Y
AX-183576343	I	96.53	Chr2	463332654	2.61e-29	chr2LG1	405555278			G	H	H	G	G	H	Y	H	G	G	H	H	Y	H	Y	G	H	H	G	G	H	H	Y	H	G	Y	G	H	H	H	Y	Y	Y	H	G	Y	Y	Y	H	Y
AX-183564686	I	96.53	Chr2	464570072	2.61e-29	chr2LG1	404646085			G	H	H	G	G	H	Y	H	G	G	H	H	Y	H	Y	G	H	H	G	G	H	H	Y	-	G	Y	H	H	H	H	Y	Y	Y	H	G	Y	Y	Y	H	Y
AX-183570606	I	96.53	Chr2	465116328	1.22e-27	super-scaffold5882	260537			G	H	H	G	G	H	Y	H	G	G	H	H	Y	H	Y	G	H	H	G	G	H	H	Y	H	G	Y	G	H	H	H	Y	Y	Y	H	G	Y	Y	Y	H	Y
AX-183570416	I	96.78	Chr2	465590626	1.22e-27	scaffold01867	70178			G	H	H	G	G	H	Y	H	G	G	H	H	-	H	Y	G	H	H	G	G	H	H	Y	Y	G	Y	G	H	H	H	-	Y	H	H	G	Y	Y	Y	H	Y
AX-183564688	I	96.91	Chr2	465636741	2.61e-29	chr2LG1	403635696			G	H	H	G	G	H	Y	H	G	G	H	H	Y	H	Y	G	H	H	G	G	H	H	Y	H	G	Y	H	H	H	H	Y	Y	Y	H	G	Y	Y	Y	H	Y
AX-183881142	I	96.91	Chr2	465638039	1.22e-27	chr2LG1	403636994			G	H	H	G	G	H	Y	H	G	G	H	H	Y	H	Y	G	H	H	G	G	H	H	Y	H	G	Y	G	H	H	H	Y	Y	Y	H	G	Y	Y	Y	H	Y
AX-183591653	I	96.91	Chr2	465961523	1.22e-27	chr2LG1	405816732			G	H	H	G	G	H	Y	H	G	G	H	H	Y	H	Y	G	H	H	G	G	H	H	Y	H	G	Y	H	H	H	H	Y	Y	Y	H	G	Y	Y	Y	H	Y
AX-183638406	I	96.91	Chr2	465962813	2.61e-29	chr2LG1	405818022			G	H	H	G	G	H	Y	H	G	G	H	H	Y	H	Y	G	H	H	G	G	H	H	Y	H	G	Y	G	H	H	H	Y	Y	Y	H	G	Y	Y	Y	H	Y
AX-183591655	I	96.91	Chr2	465965333	2.61e-29	chr2LG1	405820542			G	H	H	G	G	H	Y	H	G	G	H	H	Y	H	Y	G	H	H	G	G	H	H	Y	H	G	Y	G	H	H	H	Y	Y	Y	H	G	Y	Y	Y	H	Y
AX-183564692	I	97.28	Chr2	466758938	2.61e-29	chr2LG1	406533524			G	H	H	G	G	H	Y	H	G	G	H	H	Y	H	Y	G	H	H	G	G	H	H	Y	H	G	Y	H	H	H	H	Y	Y	Y	H	G	Y	Y	Y	H	Y
AX-183576347	I	97.28	Chr2	466789789	2.61e-29	chr2LG1	406555434			G	H	H	G	G	H	Y	H	G	G	H	H	Y	H	Y	G	H	H	G	G	H	H	Y	H	G	Y	H	H	H	H	Y	Y	Y	H	G	Y	Y	Y	H	Y
AX-183638408	I	97.65	Chr2	468180939	1.22e-27	chr2LG1	408639014			G	H	H	G	G	H	Y	H	G	G	H	H	-	H	Y	G	H	H	G	G	H	H	Y	H	G	Y	G	H	H	H	Y	Y	Y	H	G	Y	Y	Y	H	Y
AX-183576352	I	98.15	Chr2	468395506	2.61e-29	chr2LG1	408819843			G	H	H	G	G	H	Y	H	G	G	H	H	Y	H	Y	G	H	H	G	G	H	H	Y	H	G	Y	G	H	H	H	Y	Y	Y	H	G	Y	Y	Y	H	Y
AX-183638410	I	98.15	Chr2	468668631	1.22e-27	chr2LG1	408278850			G	H	H	G	G	H	Y	H	G	G	H	H	-	H	Y	G	H	H	G	G	H	H	Y	H	G	Y	G	H	H	H	Y	Y	Y	H	G	Y	Y	Y	H	Y
AX-183564696	I	98.15	Chr2	468670532	1.22e-27	chr2LG1	408279918			G	H	H	G	G	H	Y	H	G	G	H	H	-	H	Y	G	H	H	G	G	H	H	Y	H	G	Y	G	H	H	H	Y	Y	Y	H	G	Y	Y	Y	H	Y
AX-183564698	I	98.52	Chr2	468741994	2.61e-29	chr2LG1	408368538			G	H	H	G	G	H	Y	H	G	G	H	H	Y	H	Y	G	Y	H	G	G	H	H	Y	H	G	Y	H	H	H	H	Y	Y	Y	H	G	Y	Y	Y	H	Y
AX-183570767	I	98.52	Chr2	468918912	1.22e-27	chr2LG1	408487770			G	H	H	G	G	H	Y	H	G	G	H	H	Y	H	Y	G	Y	H	G	G	H	H	Y	H	G	Y	H	H	H	H	Y	Y	Y	H	G	Y	Y	Y	H	Y
AX-183894267	I	99.52	Chr2	469410206	1.22e-27	chr2LG1	409232667			G	H	H	G	G	H	Y	H	G	G	H	H	Y	H	Y	G	Y	H	G	G	H	H	Y	H	G	Y	G	H	H	H	Y	Y	Y	H	G	Y	Y	Y	H	Y
AX-183892122	I	99.77	Chr2	469637660	1.22e-27	chr2LG1	409450865			G	H	H	G	G	H	Y	H	G	G	H	H	Y	H	Y	G	Y	H	G	G	H	H	Y	H	G	Y	-	H	H	H	Y	Y	Y	H	G	Y	Y	Y	H	Y
AX-183591704	I	99.77	Chr2	469638026	2.61e-29	chr2LG1	409451231			G	H	H	G	G	H	Y	-	G	G	H	H	Y	H	Y	G	Y	H	G	G	H	H	Y	H	G	Y	G	H	H	H	Y	Y	Y	H	G	Y	Y	Y	H	Y
AX-183886042	I	99.77	Chr2	469648089	2.61e-29	chr2LG1	409461263			G	H	H	G	G	H	Y	H	G	G	H	H	Y	H	Y	G	Y	H	G	G	H	H	Y	H	G	Y	H	H	H	H	Y	Y	Y	H	G	Y	Y	Y	H	Y
AX-183576357	I	99.77	Chr2	469649140	2.61e-29	chr2LG1	409462314			G	H	H	G	G	H	Y	-	G	G	H	H	Y	H	Y	G	Y	H	G	G	H	H	Y	H	G	Y	G	H	H	H	Y	Y	Y	H	G	Y	Y	Y	H	Y
AX-183591721	I	100.02	Chr2	470125193	1.22e-27	chr2LG1	409795910			G	H	H	G	G	H	Y	H	G	G	H	H	H	H	Y	G	Y	H	G	H	H	H	Y	H	G	H	G	-	H	H	Y	Y	Y	H	G	Y	Y	Y	H	Y
AX-183591724	I	100.02	Chr2	470140274	1.22e-27	chr2LG1	409811057			G	H	H	G	G	H	Y	H	G	G	H	Y	Y	-	Y	G	Y	H	G	G	H	H	Y	H	G	Y	H	H	H	H	Y	-	Y	H	G	Y	Y	Y	H	Y
AX-183591736	I	100.14	Chr2	470380916	1.22e-27	chr2LG1	410042115			G	H	H	G	G	H	Y	-	G	G	H	H	Y	H	Y	G	Y	H	G	G	H	H	Y	H	G	Y	G	H	H	H	Y	Y	H	H	G	Y	Y	Y	H	Y
AX-183564704	I	100.27	Chr2	470419346	1.22e-27	chr2LG1	410086693			G	H	H	G	G	H	Y	H	G	G	H	H	Y	H	Y	G	Y	H	G	G	H	H	Y	H	G	Y	G	H	H	H	Y	Y	-	H	G	Y	Y	Y	H	Y
AX-183576358	I	100.27	Chr2	470516066	2.61e-29	chr2LG1	410200645			G	H	H	G	G	H	Y	H	G	G	H	H	Y	H	Y	G	Y	H	G	G	H	H	Y	H	G	Y	-	H	H	H	Y	Y	Y	H	G	Y	Y	Y	H	Y
AX-183574876	I	100.27	Chr2	470516402	2.61e-29	chr2LG1	410200981			G	H	H	G	G	H	Y	H	G	G	H	H	Y	H	Y	G	Y	H	G	G	H	H	Y	H	G	Y	-	H	H	H	Y	Y	Y	H	G	Y	Y	Y	H	Y
AX-183861431	I	100.27	Chr2	470516570	2.61e-29	chr2LG1	410201149			G	H	H	G	G	H	Y	H	G	G	H	H	Y	H	Y	G	Y	H	G	G	H	H	Y	H	G	Y	-	H	H	H	Y	Y	Y	H	G	Y	Y	Y	H	Y
AX-183591739	I	100.27	Chr2	470518009	1.22e-27	chr2LG1	410202585			G	H	H	G	G	H	Y	H	G	G	H	H	Y	H	Y	G	Y	H	G	G	H	H	Y	H	G	Y	-	H	H	H	Y	Y	Y	H	G	Y	Y	Y	H	Y
AX-183591744	I	100.27	Chr2	470552652	2.63e-24	chr2LG1	410237622			G	H	H	G	G	H	Y	H	G	G	H	H	Y	H	Y	G	Y	H	G	G	H	H	Y	H	G	Y	G	H	H	H	Y	Y	Y	H	G	Y	Y	Y	H	Y
AX-183869833	I	100.27	Chr2	470553075	5.65e-26	chr2LG1	410238045			G	H	H	G	G	H	Y	H	G	G	H	H	-	H	Y	G	-	H	G	G	H	H	Y	H	G	Y	G	H	H	H	Y	Y	Y	H	G	Y	Y	Y	H	Y
AX-183877041	I	100.27	Chr2	470554076	5.65e-26	chr2LG1	410239047			G	H	H	G	G	H	Y	H	G	G	H	H	Y	H	Y	G	Y	H	G	G	H	H	Y	H	G	Y	-	H	H	H	Y	Y	-	H	G	Y	Y	Y	H	Y
AX-183564705	I	100.27	Chr2	470571999	1.22e-27	chr2LG1	410241890			G	H	H	G	G	H	Y	H	G	G	H	H	Y	H	Y	G	Y	H	G	G	H	H	Y	H	G	Y	G	H	H	H	Y	Y	Y	H	G	Y	Y	Y	H	Y
AX-183572507	I	100.27	Chr2	470972193	2.61e-29	scaffold01639	327652			G	H	H	G	G	H	Y	H	G	G	H	H	Y	H	Y	G	Y	H	G	G	H	H	Y	H	G	Y	G	H	H	H	Y	Y	Y	H	G	Y	Y	Y	H	Y
AX-183570399	I	100.27	Chr2	471044644	2.61e-29	scaffold01639	273935			G	G	H	-	G	H	Y	H	G	G	H	H	Y	H	Y	G	H	H	-	-	H	H	Y	H	G	H	-	H	H	Y	Y	H	H	H	G	Y	Y	-	H	Y
AX-183869353	I	100.64	Chr2	472343143	2.61e-29	chr2LG1	411498076			G	H	H	G	G	H	Y	H	G	G	H	H	Y	H	Y	G	Y	H	G	G	H	H	Y	H	G	Y	G	H	H	H	Y	Y	Y	H	G	Y	Y	Y	H	Y
AX-183591866	I	100.64	Chr2	472344083	1.22e-27	chr2LG1	411499016			G	H	H	G	G	H	Y	H	G	G	H	H	Y	H	Y	G	Y	H	G	G	H	H	Y	H	G	Y	H	H	H	H	Y	Y	Y	H	G	Y	Y	Y	H	Y
AX-183570353	I	100.89	Chr2	472665203	2.61e-29	scaffold00791	32021			G	H	H	G	G	H	Y	H	G	G	H	H	Y	H	Y	G	Y	H	G	G	H	H	Y	H	G	Y	G	H	H	H	Y	Y	Y	H	G	Y	Y	Y	H	Y
AX-183879548	I	101.26	Chr2	472769026	2.63e-24	chr2LG1	411789963			G	H	H	G	G	H	Y	H	G	G	H	H	Y	H	Y	G	Y	H	G	G	H	H	Y	H	G	Y	G	H	H	H	Y	Y	Y	H	G	Y	Y	Y	H	Y
AX-183591816	I	101.26	Chr2	472875984	1.22e-27	chr2LG1	411905894			G	H	H	G	G	H	Y	H	G	G	H	H	H	H	Y	G	Y	H	G	G	H	H	Y	H	G	Y	G	H	H	H	Y	Y	-	H	G	Y	Y	Y	H	Y
AX-183564709	I	101.76	Chr2	473390867	1.22e-27	chr2LG1	412004052			G	H	H	G	G	H	Y	H	G	G	H	H	Y	H	Y	G	Y	H	G	G	H	H	Y	H	G	Y	H	H	H	H	Y	Y	Y	H	G	Y	Y	Y	H	Y
AX-183591903	I	102.13	Chr2	473616197	1.22e-27	chr2LG1	412189184			H	H	H	G	G	H	Y	H	G	G	H	H	Y	H	Y	G	Y	H	G	G	H	H	Y	H	G	Y	-	H	H	H	Y	-	H	H	G	Y	Y	Y	H	Y
AX-183888103	I	102.88	Chr2	474658043	1.22e-27	chr2LG1	412541598			H	H	H	G	G	H	Y	H	G	G	H	H	H	H	Y	G	Y	H	G	G	H	H	Y	H	G	Y	G	H	H	H	Y	Y	Y	Y	G	Y	Y	Y	H	Y
AX-183591938	I	102.88	Chr2	474747940	1.22e-27	chr2LG1	412638865			H	H	H	G	G	H	Y	H	G	G	H	H	Y	H	Y	G	Y	H	G	G	H	H	Y	H	G	Y	-	H	H	H	Y	Y	Y	Y	G	Y	Y	Y	H	Y
AX-183576369	I	102.88	Chr2	474803216	2.61e-29	chr2LG1	412683721			H	H	H	G	G	H	Y	H	G	G	H	H	Y	H	Y	G	Y	H	G	G	H	H	-	H	G	Y	H	H	H	H	H	Y	Y	Y	G	Y	Y	Y	H	Y
AX-183888104	I	102.88	Chr2	474954578	2.61e-29	chr2LG1	412786261			H	H	H	G	G	H	Y	H	G	G	H	H	Y	H	Y	G	Y	H	G	G	H	H	Y	H	G	Y	G	H	H	H	Y	Y	Y	Y	G	Y	Y	Y	H	Y
AX-183591940	I	103	Chr2	474971473	1.22e-27	chr2LG1	412802905			H	H	H	G	G	H	Y	H	G	G	H	H	Y	H	Y	G	Y	H	G	G	H	H	Y	H	G	Y	G	H	H	H	Y	Y	Y	Y	G	Y	Y	Y	H	Y
AX-183591977	I	103.13	Chr2	475249194	2.61e-29	chr2LG1	413977376			H	H	H	G	G	H	Y	H	G	G	H	H	Y	H	Y	G	Y	H	G	G	H	H	Y	H	G	Y	G	H	H	H	Y	Y	H	H	G	Y	Y	Y	H	Y
AX-183860837	I	103.62	Chr2	475349524	1.22e-27	chr2LG1	414091230			H	H	H	G	G	H	Y	H	G	G	H	H	-	H	Y	G	Y	H	G	G	H	H	Y	H	G	Y	H	H	H	H	Y	Y	Y	H	G	Y	Y	Y	H	Y
AX-183573039	I	104.37	Chr2	476796574	1.22e-27	chr1LG6	274566261			H	H	H	G	G	H	Y	H	G	G	H	H	Y	H	Y	G	Y	H	G	G	H	H	Y	H	G	Y	G	H	H	H	Y	Y	Y	H	G	Y	Y	Y	H	Y
AX-183592134	I	104.37	Chr2	476824431	1.22e-27	chr2LG1	414687812			H	H	H	G	G	H	Y	H	G	G	H	H	H	H	Y	-	Y	H	G	G	H	H	Y	H	G	Y	H	H	H	H	Y	Y	Y	H	G	Y	Y	Y	H	Y
AX-183564754	I	105.37	Chr2	477589837	1.22e-27	chr2LG1	415486382			H	H	H	G	G	H	Y	H	H	G	H	H	Y	H	Y	G	Y	H	G	G	H	H	H	H	G	Y	G	H	H	H	Y	Y	Y	H	G	Y	Y	Y	H	Y
AX-183576395	I	105.37	Chr2	477593975	1.22e-27	chr2LG1	415490520			H	H	H	G	G	H	Y	H	H	G	H	H	-	H	Y	G	Y	H	G	G	H	H	H	H	G	Y	G	H	H	H	Y	Y	-	H	G	Y	Y	Y	H	Y
AX-183592079	I	105.37	Chr2	477594380	1.22e-27	chr2LG1	415490925			H	H	H	G	G	H	Y	H	H	G	H	H	Y	H	Y	G	Y	H	G	G	H	H	H	H	G	Y	G	H	H	H	Y	Y	H	H	G	Y	Y	Y	H	Y
AX-183592081	I	105.37	Chr2	477711358	2.61e-29	chr2LG1	415595119			H	H	H	G	G	H	Y	H	H	G	H	H	Y	H	Y	G	Y	H	G	G	H	H	H	H	G	Y	-	H	H	H	Y	Y	Y	H	G	Y	Y	Y	H	Y
AX-183564756	I	105.37	Chr2	477711568	1.22e-27	chr2LG1	415595329			H	H	H	G	G	H	Y	H	H	G	H	H	Y	H	Y	G	Y	H	G	G	H	H	H	H	G	Y	G	H	H	H	Y	Y	Y	H	G	Y	Y	Y	H	Y
AX-183592082	I	105.37	Chr2	477711650	1.22e-27	chr2LG1	415595411			H	H	H	G	G	H	Y	H	H	G	H	H	H	H	Y	G	Y	H	G	G	H	H	H	H	G	Y	G	H	H	H	Y	Y	H	H	G	Y	Y	Y	H	Y
AX-183576396	I	105.37	Chr2	477727258	2.61e-29	chr2LG1	415611017			H	H	H	G	G	H	Y	H	H	G	H	H	Y	H	Y	G	Y	H	G	G	H	H	H	H	G	Y	G	H	H	H	Y	Y	-	H	G	Y	Y	Y	H	Y
AX-183626878	I	105.49	Chr2	477843777	2.61e-29	chr7LG7	16075239			H	H	H	G	G	H	Y	H	H	G	H	H	-	H	Y	G	Y	H	G	G	H	H	H	H	G	Y	G	H	H	H	Y	Y	H	H	G	Y	Y	Y	H	Y
AX-183871955	I	105.62	Chr2	477895898	2.61e-29	chr2LG1	416802340			H	H	H	G	G	-	Y	H	H	G	H	H	H	H	Y	G	Y	H	G	G	H	H	H	-	-	Y	H	H	H	H	-	Y	-	-	G	Y	Y	Y	H	Y
AX-183592248	I	105.74	Chr2	477963632	1.22e-27	chr2LG1	416867232			H	H	H	G	G	H	Y	H	H	G	H	H	Y	H	Y	G	Y	H	H	G	H	H	H	-	G	Y	H	H	H	H	Y	Y	Y	H	G	Y	Y	Y	H	Y
AX-183862601	I	105.74	Chr2	477964129	1.22e-27	chr2LG1	416867729			H	H	H	G	G	H	Y	H	H	G	H	H	Y	H	Y	G	Y	H	G	G	H	H	H	H	G	Y	G	H	H	H	Y	Y	-	H	G	Y	Y	Y	H	Y
AX-183573332	I	105.74	Chr2	477964507	1.22e-27	chr2LG1	416868107			H	-	H	G	G	H	Y	H	H	-	H	H	Y	H	Y	G	Y	H	-	G	-	H	H	H	G	Y	G	H	H	H	Y	Y	H	H	G	Y	Y	Y	H	Y
AX-183564780	I	105.74	Chr2	477965807	1.22e-27	chr2LG1	416869407			H	H	H	G	G	H	Y	H	H	G	H	H	Y	H	Y	G	Y	H	G	G	H	H	H	H	G	Y	G	H	H	H	Y	Y	-	H	G	Y	Y	Y	H	Y
AX-183576424	I	105.87	Chr2	478030773	2.61e-29	chr2LG1	416942857			H	H	H	G	G	H	Y	H	H	G	H	H	Y	H	Y	G	Y	H	G	G	H	H	H	H	G	Y	G	H	H	H	Y	Y	Y	H	G	Y	Y	Y	H	Y
AX-183576398	I	106.11	Chr2	478232714	2.61e-29	chr2LG1	416146426			H	H	H	G	G	H	Y	H	H	G	H	H	Y	H	Y	G	Y	H	G	G	H	H	H	H	G	Y	G	H	H	H	Y	Y	Y	H	G	Y	Y	Y	H	Y
AX-183592101	I	106.24	Chr2	478723556	1.22e-27	chr2LG1	416641231			H	H	H	G	G	H	Y	H	H	G	H	H	Y	H	Y	G	Y	H	G	G	H	H	H	H	G	Y	G	H	H	H	Y	Y	Y	H	G	Y	Y	Y	H	Y
AX-183576399	I	106.24	Chr2	478756900	1.22e-27	chr2LG1	416674871			H	H	H	G	G	H	Y	H	H	G	H	H	Y	H	Y	G	Y	H	G	G	H	H	H	H	G	Y	G	H	H	H	Y	Y	Y	H	G	Y	Y	Y	H	Y
AX-183573323	I	106.36	Chr2	478759064	1.22e-27	chr2LG1	416677035			H	H	H	G	G	H	Y	H	H	G	H	H	Y	H	Y	G	Y	H	G	H	H	H	H	H	G	Y	G	H	H	H	Y	Y	H	H	G	Y	Y	Y	H	Y
AX-183874734	I	106.36	Chr2	478883808	2.61e-29	chr2LG1	417160017			H	H	H	G	G	H	Y	H	H	G	H	H	Y	H	Y	G	Y	H	G	G	H	H	H	H	G	Y	H	H	H	H	Y	Y	H	H	G	Y	Y	Y	H	Y
AX-183564781	I	106.36	Chr2	478894758	1.22e-27	chr2LG1	417171069			H	H	H	G	G	H	Y	H	H	G	H	H	Y	H	Y	G	Y	H	G	G	H	H	H	H	G	Y	G	H	H	H	Y	Y	Y	H	G	Y	Y	Y	H	Y
AX-183573333	I	106.36	Chr2	478895398	1.22e-27	chr2LG1	417171709			H	H	H	G	G	H	Y	H	H	G	H	H	Y	H	Y	G	Y	H	G	G	H	H	H	H	G	Y	G	H	H	H	Y	Y	-	H	G	Y	Y	Y	H	Y
AX-183576425	I	106.36	Chr2	478940174	2.61e-29	chr2LG1	417216172			H	H	H	G	G	H	Y	H	H	G	H	H	Y	H	Y	G	Y	H	G	G	H	H	H	H	G	Y	G	H	H	H	Y	Y	Y	H	G	Y	Y	Y	H	Y
AX-183564782	I	106.49	Chr2	479089907	1.22e-27	chr2LG1	417381382			H	H	H	G	G	H	Y	H	H	G	H	H	Y	H	Y	G	Y	H	G	G	H	H	H	H	G	Y	G	H	H	H	Y	Y	-	H	G	Y	Y	Y	H	Y
AX-183576426	I	106.49	Chr2	479094747	2.61e-29	chr2LG1	417386222			H	H	H	G	G	H	Y	H	H	G	H	H	Y	H	Y	G	Y	H	G	G	H	H	H	H	G	Y	G	H	H	H	Y	Y	-	H	G	Y	Y	Y	H	Y
AX-183863142	I	106.49	Chr2	479095163	1.22e-27	chr2LG1	417386638			H	H	H	G	G	H	Y	H	H	G	H	H	Y	H	Y	G	Y	H	G	G	H	H	H	H	G	Y	G	H	H	H	Y	Y	Y	H	G	Y	Y	Y	H	Y
AX-183867168	I	106.49	Chr2	479202910	2.61e-29	chr2LG1	417495373			H	H	H	G	G	H	Y	H	H	G	H	H	-	H	Y	G	Y	H	G	G	H	H	H	H	G	Y	G	H	H	H	Y	Y	Y	H	G	Y	Y	Y	H	Y
AX-183564785	I	106.49	Chr2	479314637	2.61e-29	chr2LG1	417596746			H	H	H	G	G	H	Y	H	H	G	H	H	-	H	Y	G	Y	H	G	G	H	H	H	H	G	Y	G	H	H	H	Y	Y	-	H	G	Y	Y	Y	H	Y
AX-183564786	I	106.61	Chr2	479443976	2.61e-29	chr2LG1	417713800			H	H	H	G	G	H	Y	H	H	G	H	H	Y	H	Y	G	Y	H	G	G	H	H	H	H	G	Y	G	H	H	H	Y	Y	-	H	G	Y	Y	Y	H	Y
AX-183592153	I	106.61	Chr2	479723093	1.22e-27	chr2LG1	417051201			H	H	H	G	G	H	Y	H	H	G	H	H	H	H	Y	G	Y	H	G	G	H	H	H	H	G	Y	G	H	H	H	-	Y	Y	H	G	Y	Y	Y	H	Y
AX-183878497	I	106.61	Chr2	479723111	1.22e-27	chr2LG1	417051219			H	H	H	G	G	H	Y	H	H	G	H	H	Y	H	Y	G	Y	H	G	G	H	H	H	H	G	Y	G	H	H	H	Y	Y	H	H	G	Y	Y	Y	H	Y
AX-183576408	I	106.61	Chr2	479723249	2.61e-29	chr2LG1	417051357			H	H	H	G	G	H	Y	H	H	G	H	H	Y	H	-	G	Y	H	G	G	H	H	H	H	G	Y	-	H	H	H	Y	Y	Y	H	G	Y	Y	Y	H	Y
AX-183592154	I	106.61	Chr2	479727312	1.22e-27	chr2LG1	417055420			H	H	H	G	G	H	Y	H	H	G	H	H	-	H	Y	G	Y	H	G	G	H	H	H	H	G	Y	-	H	H	H	Y	Y	-	H	G	Y	Y	Y	H	Y
AX-183592155	I	106.61	Chr2	479727539	2.61e-29	chr2LG1	417055647			H	H	H	G	G	H	Y	H	H	G	H	H	-	H	Y	G	Y	H	G	G	H	H	H	H	G	Y	G	H	H	H	Y	Y	-	H	G	Y	Y	Y	H	Y
AX-183592156	I	106.61	Chr2	479727582	1.22e-27	chr2LG1	417055690			H	H	H	G	G	H	Y	H	H	G	H	H	-	H	Y	G	Y	H	G	G	H	H	H	H	G	Y	G	H	H	H	Y	Y	-	H	G	Y	Y	Y	H	Y
AX-183871401	I	106.61	Chr2	479736405	2.61e-29	chr2LG1	417064514			H	H	H	G	G	H	Y	H	H	G	H	H	Y	H	Y	G	Y	H	-	G	H	H	H	H	G	Y	G	H	H	H	Y	Y	H	H	G	Y	Y	Y	H	Y
AX-183861837	I	106.86	Chr2	479826856	1.22e-27	scaffold01985	70254			H	H	H	G	G	H	Y	H	H	G	H	H	Y	H	Y	G	Y	H	G	G	H	H	H	H	G	Y	-	H	H	H	Y	Y	Y	H	G	Y	Y	Y	H	Y
AX-183564787	I	106.98	Chr2	479843143	2.61e-29	scaffold01985	53965			H	H	H	G	G	H	Y	H	H	G	H	H	Y	H	Y	G	Y	H	G	G	H	H	H	H	G	Y	G	H	H	H	-	H	Y	H	G	Y	Y	Y	H	Y
AX-183884446	I	107.11	Chr2	480179634	1.22e-27	chr2LG1	417932185			H	H	H	G	G	H	Y	H	H	G	H	H	Y	H	Y	G	Y	H	G	G	H	H	H	H	G	Y	G	H	H	H	Y	Y	Y	H	G	Y	Y	Y	H	Y
AX-183887633	I	107.11	Chr2	480179724	2.61e-29	chr2LG1	417932275			H	H	H	G	G	H	Y	H	H	G	H	H	Y	H	Y	G	Y	H	G	G	H	H	H	H	G	Y	G	H	H	H	Y	Y	Y	H	G	Y	Y	Y	H	Y
AX-183573784	I	107.35	Chr2	480231128	1.22e-27	chr2LG1	417984019			H	H	H	G	G	H	Y	H	H	G	H	H	-	H	Y	G	Y	H	G	G	H	H	H	H	G	Y	G	H	H	H	Y	Y	Y	H	G	Y	Y	Y	H	Y
AX-183866639	I	107.35	Chr2	480497894	2.61e-29	chr2LG1	418284067			H	H	H	G	G	H	Y	H	H	G	H	H	-	H	Y	G	Y	H	G	G	H	H	H	H	G	Y	G	H	H	H	Y	Y	-	H	G	Y	Y	Y	H	Y
AX-183576422	I	107.35	Chr2	480498422	2.61e-29	chr2LG1	418284595			H	H	H	G	G	H	Y	H	H	G	H	H	Y	H	Y	G	Y	H	G	G	H	H	H	H	G	Y	-	H	H	H	Y	Y	Y	H	G	Y	Y	Y	H	Y
AX-183564789	I	107.48	Chr2	480912724	1.22e-27	chr2LG1	418345547			H	H	H	G	G	H	Y	H	H	G	Y	H	Y	H	Y	G	Y	H	G	G	H	H	H	H	G	Y	H	H	H	H	Y	Y	Y	H	G	Y	Y	Y	H	Y
AX-183592282	I	107.48	Chr2	480910205	1.22e-27	chr2LG1	418343028			H	H	H	G	G	H	Y	H	H	G	Y	H	Y	H	Y	G	Y	H	G	G	H	H	H	H	G	Y	G	H	H	H	Y	Y	Y	H	G	Y	Y	Y	H	Y
AX-183592281	I	107.48	Chr2	480909577	1.22e-27	chr2LG1	418342400			H	H	H	G	G	H	Y	H	H	G	Y	H	Y	H	Y	G	Y	H	G	G	H	H	H	H	G	Y	G	H	H	H	Y	Y	H	H	G	Y	Y	Y	H	Y
AX-183576430	I	107.48	Chr2	480905915	2.61e-29	chr2LG1	418338738			H	H	H	G	G	H	Y	H	H	G	Y	H	-	H	Y	G	Y	H	G	G	H	H	H	H	G	Y	G	H	H	H	Y	Y	-	H	G	Y	Y	Y	H	Y
AX-183576432	I	107.73	Chr2	481022101	2.61e-29	chr2LG1	418455289			H	H	H	G	G	H	Y	H	H	G	Y	H	Y	H	Y	G	Y	H	G	G	H	H	H	H	G	Y	-	H	H	H	Y	Y	Y	H	G	Y	Y	Y	H	Y
AX-183564792	I	107.73	Chr2	481039037	1.22e-27	chr2LG1	418472257			H	H	H	G	G	H	Y	H	H	G	Y	H	Y	H	Y	G	Y	H	G	G	H	H	H	H	G	Y	G	H	H	H	Y	Y	H	H	G	Y	Y	Y	H	Y
AX-183592292	I	107.73	Chr2	481043658	1.22e-27	chr2LG1	418476878			H	H	H	G	G	H	Y	H	H	G	Y	H	Y	H	Y	G	Y	H	G	G	H	H	H	H	G	Y	G	H	H	H	Y	Y	Y	H	G	Y	Y	Y	H	Y
AX-183573789	I	107.73	Chr2	481121097	1.22e-27	chr2LG1	418545109			H	H	H	G	G	H	Y	H	H	G	Y	H	H	H	-	G	Y	H	H	G	H	H	H	H	G	Y	G	H	H	H	-	Y	H	H	G	Y	Y	Y	H	Y
AX-183894896	I	107.85	Chr2	481203735	1.22e-27	chr2LG1	418586424			H	H	H	G	G	H	Y	H	H	G	Y	H	Y	H	Y	G	Y	H	G	G	H	H	H	H	G	Y	G	H	H	H	Y	Y	Y	H	G	Y	Y	Y	H	Y
AX-183576434	I	107.85	Chr2	481306549	1.22e-27	chr2LG1	418677578			H	H	H	G	G	H	Y	H	H	G	Y	H	-	H	Y	G	Y	H	G	G	H	H	H	H	G	Y	-	H	H	H	Y	Y	-	H	G	Y	Y	Y	H	Y
AX-183638436	I	107.85	Chr2	481307805	1.22e-27	chr2LG1	418678834			H	H	H	G	G	H	Y	H	H	G	Y	H	Y	H	Y	G	Y	H	G	G	H	H	H	H	G	Y	G	H	H	H	Y	Y	Y	H	G	Y	Y	Y	H	Y
AX-183882312	I	107.85	Chr2	481311211	2.61e-29	chr2LG1	418682240			H	H	H	G	G	H	Y	H	H	G	Y	H	H	H	Y	G	Y	H	G	G	H	H	H	H	G	Y	G	H	H	H	Y	Y	H	H	G	Y	Y	Y	H	Y
AX-183592307	I	107.85	Chr2	481457726	2.61e-29	chr2LG1	418804602			H	H	H	G	G	H	Y	H	H	G	Y	H	Y	H	Y	G	Y	H	G	G	H	H	H	H	G	Y	G	H	H	H	Y	Y	Y	H	G	Y	Y	Y	H	Y
AX-183592308	I	107.85	Chr2	481458319	2.61e-29	chr2LG1	418805195			H	H	H	G	G	H	Y	H	H	G	Y	H	Y	H	Y	G	Y	H	G	G	H	H	H	-	G	Y	G	H	H	H	Y	Y	Y	H	G	Y	Y	Y	Y	Y
AX-183592309	I	107.85	Chr2	481464071	2.61e-29	chr2LG1	418810947			H	H	H	G	G	H	Y	H	H	G	Y	H	Y	H	Y	G	Y	H	G	G	H	H	H	H	G	Y	G	H	H	H	Y	Y	Y	H	G	Y	Y	Y	H	Y
AX-183862720	I	107.85	Chr2	481519181	2.61e-29	chr2LG1	418865952			H	H	H	G	G	H	Y	H	H	G	Y	H	Y	H	Y	G	Y	H	G	G	H	H	H	H	G	Y	G	H	H	H	Y	Y	Y	H	G	Y	Y	Y	H	Y
AX-183576436	I	107.85	Chr2	481520534	2.61e-29	chr2LG1	418867305			H	H	H	G	G	H	Y	H	H	G	Y	H	Y	H	Y	G	Y	H	G	G	H	H	H	H	G	Y	G	H	H	H	Y	Y	Y	H	G	Y	Y	Y	H	Y
AX-183564798	I	107.85	Chr2	481787593	2.61e-29	chr2LG1	419145167			H	H	H	G	G	H	Y	-	H	G	Y	H	H	H	Y	G	Y	H	G	G	H	H	H	-	G	Y	G	H	H	-	Y	Y	Y	H	G	Y	Y	Y	-	Y
AX-183576437	I	107.97	Chr2	481788033	1.22e-27	chr2LG1	419145607			H	H	H	G	G	H	Y	H	H	G	Y	H	Y	H	Y	G	Y	H	G	G	H	H	H	H	G	Y	H	H	H	H	Y	Y	Y	H	G	Y	Y	Y	H	Y
AX-183592342	I	107.97	Chr2	481953966	1.22e-27	chr2LG1	419326981			H	H	H	G	G	H	Y	H	H	G	Y	H	-	H	Y	G	Y	H	G	G	H	H	H	H	G	Y	H	H	H	H	Y	Y	Y	H	G	Y	Y	Y	H	Y
AX-183867557	I	108.1	Chr2	481986921	2.61e-29	chr2LG1	419360297			H	H	H	G	G	H	Y	H	H	G	Y	H	Y	H	Y	G	Y	H	G	G	H	H	H	-	G	Y	H	H	H	H	Y	Y	Y	H	G	Y	Y	Y	H	Y
AX-183564799	I	108.1	Chr2	482035541	2.61e-29	chr2LG1	419410245			H	H	H	G	G	H	Y	H	H	G	Y	H	-	H	Y	G	Y	H	G	G	H	H	H	H	G	Y	H	H	H	H	Y	Y	-	H	G	Y	Y	Y	H	Y
AX-183564801	I	108.1	Chr2	482125704	2.61e-29	chr2LG1	419501327			H	H	H	G	G	H	Y	H	H	G	Y	H	Y	H	Y	G	Y	H	G	G	H	H	H	H	G	Y	H	H	H	H	Y	Y	-	H	G	Y	Y	Y	H	Y
AX-183576438	I	108.22	Chr2	482150611	2.61e-29	chr2LG1	419531282			H	H	H	G	G	H	Y	H	H	G	Y	H	Y	H	Y	G	Y	H	H	G	H	H	H	H	G	Y	H	H	H	H	Y	Y	Y	H	G	Y	Y	Y	H	Y
AX-183573339	I	108.22	Chr2	482151631	1.22e-27	chr2LG1	419532305			H	H	H	G	G	H	Y	H	H	G	Y	H	Y	H	Y	G	Y	H	G	G	H	H	H	H	G	Y	H	H	H	H	Y	Y	Y	H	G	Y	Y	Y	H	Y
AX-183573340	I	108.22	Chr2	482218216	1.22e-27	chr2LG1	419556878			H	H	H	G	G	H	Y	H	H	G	Y	H	H	H	Y	G	Y	H	G	G	H	H	H	H	G	Y	H	H	H	H	Y	Y	-	H	G	Y	Y	Y	H	Y
AX-183564803	I	108.22	Chr2	482218918	1.22e-27	chr2LG1	419557580			H	H	H	G	G	H	Y	H	H	G	Y	H	Y	H	Y	G	Y	H	G	G	H	H	H	H	G	Y	H	H	H	H	Y	Y	Y	H	G	Y	Y	Y	H	Y
AX-183564804	I	108.22	Chr2	482221706	2.61e-29	chr2LG1	419560368			H	H	H	G	G	H	Y	H	H	G	Y	H	Y	H	Y	G	Y	H	G	G	H	H	H	H	G	Y	H	H	H	H	Y	Y	Y	H	G	Y	Y	Y	H	Y
AX-183592365	I	108.35	Chr2	482693504	1.22e-27	chr2LG1	419834607			H	H	H	G	G	H	Y	H	H	G	Y	H	Y	H	Y	G	Y	H	G	G	H	H	H	-	G	Y	H	H	H	H	Y	Y	Y	H	H	Y	Y	Y	H	Y
AX-183592366	I	108.35	Chr2	482694490	2.61e-29	chr2LG1	419835593			H	H	H	G	G	H	Y	H	H	G	Y	H	Y	H	Y	G	Y	H	G	G	H	H	H	H	G	Y	H	H	H	H	Y	Y	Y	H	H	Y	Y	Y	H	Y
AX-183887635	I	108.35	Chr2	482702381	2.61e-29	chr2LG1	419843417			H	H	H	G	G	H	Y	H	H	G	Y	H	Y	H	Y	G	Y	H	G	G	H	H	H	H	G	Y	H	H	H	H	Y	Y	Y	H	H	Y	Y	Y	H	Y
AX-183564806	I	108.35	Chr2	482796233	2.61e-29	chr2LG1	419922497			H	H	H	G	G	H	Y	H	H	G	Y	H	Y	H	Y	G	Y	H	G	G	H	H	H	H	G	Y	H	H	H	H	Y	Y	Y	H	H	Y	Y	Y	H	Y
AX-183866488	I	108.35	Chr2	482796720	1.22e-27	chr2LG1	419922984			H	H	H	G	G	H	Y	H	H	G	Y	H	Y	H	Y	G	Y	H	G	G	H	H	H	H	G	Y	H	H	H	H	Y	Y	-	H	H	Y	Y	Y	H	Y
AX-183564807	I	108.35	Chr2	483020770	1.22e-27	chr2LG1	420162792			H	H	H	G	G	H	Y	-	H	G	Y	H	Y	H	Y	G	Y	H	G	G	H	H	H	H	G	Y	H	H	H	H	Y	Y	Y	H	H	Y	Y	Y	H	Y
AX-183576443	I	108.35	Chr2	483021945	1.22e-27	chr2LG1	420163967			H	H	H	G	G	H	Y	H	H	G	Y	H	Y	H	Y	G	Y	H	G	G	H	H	H	H	G	Y	H	H	H	H	Y	Y	Y	H	H	Y	Y	Y	H	Y
AX-183573342	I	108.35	Chr2	483171217	1.22e-27	chr2LG1	420329605			H	H	H	G	G	H	Y	H	H	G	Y	H	Y	H	Y	G	Y	H	G	G	H	H	H	H	G	Y	H	H	H	H	Y	Y	Y	H	H	Y	Y	Y	H	Y
AX-183576444	I	108.47	Chr2	483172733	2.61e-29	chr2LG1	420331121			H	H	H	G	G	H	Y	H	H	G	Y	H	-	H	Y	G	Y	H	G	G	H	H	H	H	G	Y	H	H	H	H	Y	Y	Y	H	H	Y	Y	Y	H	Y
AX-183570801	I	108.59	Chr2	483818920	1.22e-27	chr2LG1	420968567			H	H	H	G	G	H	Y	H	H	G	Y	H	Y	H	Y	G	Y	H	G	G	H	H	H	H	G	Y	H	H	H	H	Y	Y	Y	H	H	Y	Y	Y	H	Y
AX-183866652	I	108.59	Chr2	483818983	1.22e-27	chr2LG1	420968630			H	H	H	G	G	H	Y	H	H	G	Y	H	Y	H	Y	G	Y	H	G	G	H	H	H	H	G	Y	H	H	H	H	Y	Y	Y	H	H	Y	Y	Y	H	Y
AX-183635586	I	108.97	Chr2	484088148	2.61e-29	scaffold02972	107062			H	H	H	G	G	H	Y	H	H	G	H	H	Y	H	Y	G	Y	H	G	G	H	H	H	H	G	Y	H	H	H	H	Y	Y	Y	H	H	Y	Y	Y	H	Y
AX-183572555	I	108.97	Chr2	484090446	2.61e-29	scaffold02972	104764			H	H	H	G	G	H	Y	H	H	G	Y	H	Y	H	Y	G	Y	H	G	G	H	H	H	H	G	Y	H	H	H	H	Y	Y	Y	H	H	Y	Y	Y	H	Y
AX-183635585	I	108.97	Chr2	484095425	1.22e-27	scaffold02972	99785			H	H	H	G	G	H	Y	H	-	G	-	-	Y	H	Y	G	Y	H	-	G	H	H	-	H	G	Y	H	-	H	H	Y	Y	H	H	H	Y	Y	Y	H	Y
AX-183863345	I	109.09	Chr2	484311036	2.61e-29	chr2LG1	421278811			H	H	H	G	G	H	Y	H	H	G	Y	H	Y	H	Y	G	Y	H	G	G	H	H	H	H	G	Y	H	H	H	H	Y	Y	Y	H	H	Y	Y	Y	H	Y
AX-183570542	I	109.59	Chr2	484527142	2.61e-29	scaffold03839	33457			H	H	H	G	G	H	Y	H	H	G	Y	H	Y	H	Y	G	Y	H	G	G	H	H	H	H	G	Y	H	H	H	H	Y	Y	H	H	H	H	Y	Y	H	Y
AX-183572583	I	109.59	Chr2	484531784	2.61e-29	scaffold03839	38099			H	H	H	G	G	H	Y	H	H	G	Y	H	Y	H	Y	G	Y	H	G	G	H	H	H	H	G	Y	H	H	H	H	Y	Y	H	H	H	H	Y	Y	H	Y
AX-183636483	I	109.71	Chr2	484538933	1.22e-27	scaffold03839	45250			H	H	H	G	G	H	Y	-	H	G	Y	H	Y	H	Y	G	-	H	G	G	H	H	H	H	-	Y	H	H	H	H	Y	Y	-	H	H	H	Y	Y	H	Y
AX-183581053	I	109.84	Chr2	484621928	2.61e-29	scaffold05147	26561			H	H	H	G	G	H	Y	H	H	G	Y	H	Y	H	Y	G	Y	H	G	G	H	H	H	H	G	Y	H	H	H	H	Y	Y	H	H	H	H	Y	Y	H	Y
AX-183880503	I	109.84	Chr2	484622510	2.61e-29	scaffold05147	25979			H	H	H	G	G	H	Y	H	H	G	Y	H	-	H	Y	G	Y	H	G	G	H	H	H	H	G	Y	H	H	H	H	Y	Y	H	H	H	H	Y	Y	H	Y
AX-183637114	I	109.84	Chr2	484622915	2.61e-29	scaffold05147	25574			H	H	H	G	G	H	Y	H	H	G	Y	H	Y	H	Y	G	Y	H	G	G	H	H	H	H	G	Y	H	H	H	H	Y	Y	H	H	H	H	Y	Y	H	Y
AX-183564827	I	109.96	Chr2	484714837	1.22e-27	chr2LG1	421743913			H	H	H	-	G	H	Y	H	H	G	Y	H	-	H	Y	G	Y	H	G	G	H	H	H	H	G	Y	H	H	H	H	Y	Y	H	H	H	H	Y	Y	H	Y
AX-183592391	I	109.96	Chr2	484795132	1.22e-27	chr2LG1	421662706			H	H	H	H	G	H	Y	H	H	G	Y	H	Y	H	Y	G	Y	H	G	G	H	H	H	H	G	Y	H	H	H	H	Y	Y	H	H	H	H	Y	Y	H	Y
AX-183570805	I	109.96	Chr2	484809860	1.22e-27	chr2LG1	421648114			H	H	H	H	G	H	Y	H	H	G	Y	H	-	H	Y	G	Y	H	G	G	H	H	H	H	G	Y	H	H	H	H	Y	Y	H	H	H	H	Y	Y	H	Y
AX-183865644	I	110.08	Chr2	485044446	2.61e-29	chr2LG1	421437594			H	H	H	H	G	H	Y	H	H	G	Y	H	Y	H	Y	G	Y	H	G	G	H	H	H	H	G	Y	H	H	H	H	Y	Y	H	H	H	H	Y	Y	H	Y
AX-183865366	I	110.08	Chr2	485044483	2.61e-29	chr2LG1	421437557			H	H	H	H	G	H	Y	H	H	G	Y	H	Y	H	Y	G	Y	H	G	G	H	H	H	H	G	Y	H	H	H	H	Y	Y	H	H	H	H	Y	Y	H	Y
AX-183564824	I	110.08	Chr2	485045604	2.61e-29	chr2LG1	421436436			H	H	H	H	G	H	Y	H	H	G	Y	H	Y	H	Y	G	Y	H	G	G	H	H	H	H	G	Y	H	H	H	H	Y	Y	-	H	H	H	Y	Y	H	Y
AX-183564811	I	110.08	Chr2	485208109	2.61e-29	chr2LG1	422792157			H	H	H	H	G	H	Y	Y	H	H	Y	H	Y	H	Y	H	Y	H	G	G	H	H	H	H	G	-	G	H	H	H	H	Y	H	H	H	H	Y	Y	H	Y
AX-183576447	I	110.46	Chr2	485233320	2.61e-29	chr2LG1	422817484			H	H	H	H	G	H	Y	H	H	G	Y	H	Y	H	Y	G	Y	H	G	G	H	H	H	H	G	Y	H	H	H	H	Y	Y	H	H	H	H	Y	Y	H	Y
AX-183564831	I	110.46	Chr2	485322270	1.22e-27	chr2LG1	422207077			H	H	H	H	G	H	Y	H	H	G	Y	H	Y	H	Y	G	Y	H	G	G	H	H	H	H	G	Y	H	H	H	H	Y	Y	H	H	H	H	Y	Y	H	Y
AX-183573348	I	110.7	Chr2	485374827	1.22e-27	chr2LG1	421767826			H	H	H	H	G	H	Y	H	H	G	Y	H	Y	H	Y	G	Y	H	G	G	H	H	H	Y	G	Y	H	H	H	H	Y	Y	H	H	H	H	Y	Y	H	Y
AX-183592406	I	110.7	Chr2	485425310	1.22e-27	chr2LG1	421820552			H	H	H	H	G	H	Y	H	H	G	Y	H	Y	H	Y	G	Y	H	G	G	H	H	H	Y	G	Y	H	H	H	H	Y	Y	H	H	H	H	Y	Y	H	Y
AX-183868446	I	110.83	Chr2	485708141	2.61e-29	chr2LG1	422137452			H	H	H	H	G	H	Y	H	H	G	Y	H	Y	H	-	G	Y	H	G	G	H	H	H	H	G	Y	H	H	H	H	Y	Y	H	H	H	H	Y	Y	H	Y
AX-183869704	I	110.83	Chr2	485707399	1.22e-27	chr2LG1	422136710			H	H	H	H	G	H	Y	H	H	G	Y	H	Y	H	Y	G	Y	H	G	G	H	H	H	Y	G	Y	H	H	H	H	Y	Y	H	H	H	H	Y	Y	H	Y
AX-183564830	I	111.08	Chr2	486311121	1.22e-27	chr2LG1	422648034			H	H	H	H	G	H	Y	H	H	G	Y	H	Y	H	Y	G	Y	H	G	G	H	H	H	Y	G	Y	H	H	H	H	Y	Y	H	H	H	H	Y	Y	H	H
AX-183570807	I	111.08	Chr2	486259558	1.22e-27	chr2LG1	422594325			H	H	H	H	G	H	Y	H	H	G	Y	H	Y	H	Y	G	Y	H	G	G	H	H	H	Y	G	Y	H	H	H	H	Y	Y	H	H	H	H	Y	Y	H	H
AX-183564829	I	111.08	Chr2	486258894	2.61e-29	chr2LG1	422593661			H	H	H	H	G	H	Y	H	H	G	Y	H	Y	H	Y	G	Y	H	G	G	H	H	H	Y	G	Y	H	H	H	H	Y	Y	H	H	H	H	Y	Y	H	H
AX-183570806	I	111.08	Chr2	486258775	2.61e-29	chr2LG1	422593542			H	H	H	H	G	H	Y	H	H	G	Y	H	-	H	Y	G	Y	H	G	G	H	H	H	-	G	Y	H	H	H	H	Y	Y	H	H	H	H	Y	Y	H	H
AX-183576466	I	111.45	Chr2	486663690	2.61e-29	chr2LG1	423220334			H	H	H	H	G	H	Y	H	H	G	Y	H	Y	H	Y	G	Y	H	G	G	H	H	H	Y	G	Y	H	H	G	H	Y	Y	-	H	H	H	Y	Y	H	H
AX-183863813	I	111.45	Chr2	486659060	2.61e-29	chr2LG1	423215704			H	H	H	H	G	H	Y	H	H	G	Y	H	Y	H	Y	G	Y	H	G	G	H	H	H	Y	G	Y	H	H	G	H	Y	Y	-	H	H	H	Y	Y	H	H
AX-183890280	I	111.57	Chr2	486777556	2.61e-29	scaffold04440	33955			H	H	H	H	G	H	Y	H	H	G	Y	H	-	H	Y	G	Y	H	G	G	H	H	H	-	G	Y	H	H	G	H	Y	Y	-	H	H	H	Y	Y	H	H
AX-183871892	I	111.57	Chr2	486762168	1.22e-27	scaffold04440	18704			H	H	H	H	G	H	Y	H	H	G	Y	H	Y	H	Y	G	Y	H	G	G	H	H	H	-	G	Y	H	H	G	H	Y	Y	H	H	H	H	Y	Y	H	H
AX-183891173	I	111.57	Chr2	486758717	2.61e-29	scaffold04440	15371			H	H	H	H	G	H	Y	H	H	G	Y	H	Y	H	Y	G	Y	H	G	G	H	H	H	Y	G	Y	H	H	G	H	Y	Y	H	H	H	H	Y	Y	H	H
AX-183592530	I	113.72	Chr2	488494508	2.61e-29	chr2LG1	424728794			H	H	H	H	G	H	Y	H	H	G	Y	H	H	G	Y	G	Y	H	G	G	H	H	H	H	G	Y	H	H	G	H	Y	Y	H	H	H	H	Y	Y	Y	H
AX-183570818	I	113.72	Chr2	488476993	2.61e-29	chr2LG1	424711279			H	H	H	H	G	H	Y	H	H	G	Y	H	Y	G	Y	G	Y	H	G	G	H	H	H	Y	G	Y	H	H	G	H	Y	Y	H	H	H	H	Y	Y	Y	H
AX-183582419	I	113.72	Chr2	488285427	1.22e-27	scaffold03604	51741			H	H	H	H	G	H	Y	H	H	G	Y	H	Y	G	Y	G	Y	H	G	G	H	H	H	Y	G	Y	H	H	G	H	Y	Y	H	H	H	H	Y	Y	Y	H
AX-183866338	I	113.72	Chr2	488278606	1.22e-27	scaffold03604	44920			H	H	H	H	G	H	Y	H	H	G	Y	H	Y	G	Y	G	Y	H	G	G	H	H	H	Y	G	Y	H	H	G	H	Y	Y	H	H	H	H	Y	Y	Y	H
AX-183860937	I	113.72	Chr2	488188981	1.22e-27	chr2LG1	423742344			H	H	H	H	G	H	Y	H	H	G	Y	H	-	G	Y	G	Y	H	G	G	H	H	H	Y	G	Y	H	H	G	H	Y	Y	H	H	H	H	Y	Y	Y	H
AX-183592498	I	113.85	Chr2	488186886	1.22e-27	chr2LG1	423740249			H	H	H	-	G	H	Y	H	H	G	Y	H	-	G	Y	G	Y	H	G	G	H	H	H	Y	G	Y	H	H	G	H	Y	Y	H	H	H	H	Y	Y	Y	H
AX-183570380	I	113.85	Chr2	488171826	1.22e-27	scaffold01223	49617			H	H	H	H	G	H	Y	H	H	G	Y	H	Y	G	Y	G	Y	H	G	G	H	H	H	Y	G	Y	H	H	G	H	Y	Y	H	H	H	H	Y	Y	Y	H
AX-183878372	I	113.85	Chr2	488170569	1.22e-27	scaffold01223	48360			H	H	H	H	G	H	Y	H	H	G	Y	H	Y	G	Y	G	Y	H	G	G	H	H	H	H	G	Y	-	H	G	H	Y	Y	H	H	H	H	Y	Y	Y	H
AX-183876545	I	113.85	Chr2	488159994	2.61e-29	chr2LG1	424105791			H	H	H	H	G	H	Y	H	H	G	Y	H	Y	G	Y	G	Y	H	G	G	H	H	H	-	G	Y	H	H	G	H	Y	Y	H	H	H	H	Y	Y	Y	H
AX-183888988	I	113.85	Chr2	488159364	2.61e-29	chr2LG1	424105161			H	H	H	H	G	H	Y	H	H	G	Y	H	-	G	Y	G	Y	H	G	G	H	H	H	-	G	Y	H	H	G	H	Y	Y	H	H	H	H	Y	Y	Y	H
AX-183870736	I	113.85	Chr2	488159059	1.22e-27	chr2LG1	424104856			H	H	H	H	G	H	Y	H	H	G	Y	H	Y	G	Y	G	Y	H	G	G	H	H	H	Y	G	Y	H	H	G	H	Y	Y	H	H	H	H	Y	Y	Y	H
AX-183884990	I	113.85	Chr2	488159015	2.61e-29	chr2LG1	424104812			H	H	H	H	G	H	Y	H	H	G	Y	H	Y	G	Y	G	Y	H	G	G	H	H	H	Y	G	Y	H	H	G	-	Y	Y	H	H	H	H	Y	Y	Y	H
AX-183592525	I	113.85	Chr2	488156863	1.22e-27	chr2LG1	424102660			H	H	H	H	G	H	Y	H	H	G	Y	H	-	G	Y	G	Y	H	G	G	H	H	H	Y	G	Y	H	H	G	H	Y	Y	H	H	H	H	Y	Y	Y	H
AX-183573356	I	113.85	Chr2	488156592	1.22e-27	chr2LG1	424102389			H	H	H	H	-	H	Y	H	H	G	Y	H	-	G	Y	G	Y	H	G	G	H	H	H	-	G	Y	H	H	G	H	Y	Y	H	H	H	H	Y	Y	Y	H
AX-183564862	I	114.59	Chr2	489754457	2.61e-29	chr2LG1	425179993			H	H	H	H	G	H	Y	H	H	G	Y	H	-	G	Y	G	Y	H	G	G	H	H	H	-	G	Y	H	H	G	H	Y	Y	H	H	H	H	Y	Y	Y	H
AX-183871404	I	114.59	Chr2	489752979	2.61e-29	chr2LG1	425178515			H	H	H	H	G	H	Y	H	H	G	Y	H	Y	G	Y	G	Y	H	G	G	H	H	H	Y	G	Y	H	H	G	H	Y	Y	H	H	H	H	Y	Y	Y	H
AX-183573358	I	114.59	Chr2	489752550	2.61e-29	chr2LG1	425178086			H	H	H	H	G	H	Y	H	H	G	Y	H	Y	G	Y	G	Y	H	G	G	H	H	H	H	G	Y	H	H	G	H	Y	Y	H	H	H	H	Y	Y	Y	H
AX-183592597	I	114.59	Chr2	489752330	1.22e-27	chr2LG1	425177866			H	H	H	H	G	H	Y	H	H	G	Y	H	Y	G	Y	G	Y	H	G	G	H	H	H	Y	G	Y	H	H	G	H	Y	Y	H	H	H	H	Y	Y	Y	H
AX-183592476	I	114.59	Chr2	489267467	1.22e-27	chr2LG1	424858044			H	H	H	H	G	H	Y	H	H	G	Y	H	H	G	Y	-	Y	H	G	G	H	H	H	-	G	Y	H	H	-	H	Y	Y	H	H	H	H	Y	Y	Y	H
AX-183863946	I	114.72	Chr2	489932861	2.61e-29	scaffold00769	9681			H	H	H	H	G	H	Y	H	H	G	Y	H	Y	G	Y	G	Y	H	G	G	H	H	H	Y	G	Y	H	H	G	H	Y	Y	H	H	H	H	Y	Y	Y	H
AX-183570351	I	114.72	Chr2	489923522	1.22e-27	scaffold00769	19013			H	H	H	H	G	H	Y	H	H	G	Y	H	Y	G	Y	G	Y	H	G	G	H	H	H	Y	G	Y	H	H	G	H	Y	Y	H	H	H	H	Y	Y	Y	H
AX-183892729	I	114.72	Chr2	489922877	1.22e-27	scaffold00769	19658			H	H	H	H	G	H	Y	H	H	G	Y	H	Y	G	Y	G	Y	H	G	G	H	H	H	Y	G	Y	H	H	G	H	Y	Y	H	H	H	H	Y	Y	Y	H
AX-183582343	I	114.72	Chr2	489906146	2.61e-29	scaffold00769	36389			H	H	H	H	G	H	Y	H	H	G	Y	H	Y	G	Y	G	Y	H	G	G	H	H	H	Y	G	Y	H	H	G	H	Y	Y	H	H	H	H	Y	Y	Y	H
AX-183570352	I	114.72	Chr2	489905122	2.61e-29	scaffold00769	37413			H	H	H	H	G	H	Y	H	H	G	Y	H	Y	G	Y	G	Y	H	G	G	H	H	H	Y	G	Y	H	H	G	H	Y	Y	H	H	H	H	Y	Y	Y	H
AX-183576485	I	114.72	Chr2	489824426	2.61e-29	chr2LG1	425236686			H	H	H	H	G	H	Y	H	H	G	Y	H	Y	G	Y	G	Y	H	G	G	H	H	H	Y	G	Y	H	H	G	H	Y	Y	H	H	H	H	Y	Y	Y	H
AX-183564854	I	114.84	Chr2	489963847	1.22e-27	chr2LG1	425287415			H	H	H	H	G	H	Y	H	H	G	Y	H	Y	G	Y	G	Y	H	G	G	H	H	H	Y	G	Y	H	H	G	H	Y	Y	H	H	H	H	Y	Y	Y	H
AX-183592533	I	114.84	Chr2	489962824	2.61e-29	chr2LG1	425286392			H	H	H	H	G	H	Y	H	H	G	Y	H	H	G	Y	G	Y	H	G	G	H	H	H	Y	G	Y	H	H	G	H	Y	Y	H	H	H	H	Y	Y	Y	H
AX-183564856	I	115.34	Chr2	490393393	1.22e-27	chr2LG1	425724506			H	H	H	H	G	H	Y	H	H	G	Y	H	Y	G	Y	G	Y	H	G	G	H	H	H	Y	G	Y	H	H	G	H	Y	Y	H	H	H	H	Y	Y	Y	H
AX-183893933	I	115.34	Chr2	490392515	1.22e-27	chr2LG1	425723628			H	H	H	H	G	H	Y	H	H	G	Y	H	Y	G	Y	G	Y	H	G	G	H	H	H	Y	G	Y	H	H	G	H	Y	Y	H	H	H	H	Y	Y	Y	H
AX-183576479	I	115.34	Chr2	490308247	2.61e-29	chr2LG1	425636060			H	H	H	H	G	H	Y	H	H	G	Y	H	Y	G	Y	G	Y	H	G	G	H	H	H	Y	G	Y	H	H	G	H	Y	Y	H	H	H	H	Y	Y	Y	H
AX-183867159	I	115.34	Chr2	490266200	2.61e-29	chr2LG1	425604387			H	H	H	H	G	H	Y	H	H	G	Y	H	Y	G	Y	G	Y	H	G	G	H	H	H	H	G	Y	H	H	G	H	Y	Y	H	H	H	H	Y	Y	Y	H
AX-183866613	I	116.34	Chr2	491387430	1.22e-27	scaffold02648	30403			H	H	H	H	G	H	Y	H	H	G	Y	H	Y	G	Y	G	Y	H	G	G	H	H	H	Y	G	Y	H	H	G	H	Y	Y	H	H	H	H	Y	Y	Y	H
AX-183891251	I	116.46	Chr2	491442722	1.22e-27	scaffold00772	26090			H	H	H	H	G	H	Y	H	H	G	Y	H	Y	G	Y	G	Y	H	G	G	H	H	H	Y	G	Y	H	H	G	H	Y	Y	H	H	H	H	Y	Y	Y	H
AX-183873225	I	116.59	Chr2	491448677	2.61e-29	scaffold00772	32040			H	H	H	H	G	H	Y	H	H	G	Y	H	Y	G	Y	G	Y	H	G	G	H	H	H	Y	G	Y	H	H	G	H	H	Y	H	H	H	H	Y	Y	Y	H
AX-183592620	I	116.59	Chr2	491450136	1.22e-27	scaffold00772	33499			H	H	H	H	G	H	Y	H	H	G	Y	H	Y	G	Y	G	Y	H	G	G	H	H	H	Y	G	Y	H	H	G	H	Y	Y	H	H	H	H	Y	Y	Y	H
AX-183592621	I	116.59	Chr2	491450463	2.61e-29	scaffold00772	33826			H	H	H	H	G	H	Y	H	H	G	Y	H	Y	G	Y	G	Y	H	G	G	H	H	H	H	G	Y	-	H	G	H	Y	Y	H	H	H	H	Y	Y	Y	H
AX-183592625	I	116.71	Chr2	491491618	1.22e-27	scaffold00772	74949			Y	H	H	H	G	H	Y	H	H	G	Y	H	Y	G	Y	G	Y	H	G	G	H	H	H	Y	G	Y	H	H	G	H	Y	Y	H	H	H	H	Y	Y	Y	H
AX-183592652	I	117.71	Chr2	492411403	1.22e-27	chr2LG1	427380108			H	H	Y	H	G	H	Y	-	H	G	Y	H	Y	G	Y	G	H	H	G	G	H	H	H	Y	G	Y	H	H	G	H	Y	Y	H	H	H	H	Y	Y	Y	H
AX-183564874	I	117.71	Chr2	492437245	2.61e-29	chr2LG1	427407003			H	H	Y	H	G	H	Y	H	H	G	Y	H	Y	G	Y	G	H	H	G	G	H	H	H	Y	G	Y	H	H	G	H	Y	Y	H	H	H	H	Y	Y	Y	H
AX-183875161	I	117.71	Chr2	492441161	1.22e-27	chr2LG1	427410919			H	H	Y	H	G	H	-	H	H	G	Y	H	-	G	Y	G	H	H	G	G	H	H	H	Y	G	Y	H	H	G	H	Y	Y	H	H	H	H	Y	-	Y	H
AX-183592655	I	117.71	Chr2	492443004	1.22e-27	chr2LG1	427412682			H	H	Y	H	G	H	Y	H	H	G	-	H	Y	G	Y	G	H	H	G	G	H	H	H	Y	G	Y	H	H	G	H	Y	Y	H	H	H	H	Y	Y	Y	H
AX-183870216	II	0	Chr6	433680	1.22e-27	chr6LG2	683319			H	H	H	Y	H	Y	H	Y	G	H	H	H	G	H	G	G	H	Y	H	Y	H	H	G	H	Y	Y	H	H	H	H	G	H	Y	H	H	H	H	H	H	Y
AX-183872695	II	0.12	Chr6	472386	2.61e-29	chr6LG2	729827			H	H	H	Y	H	Y	H	Y	G	H	H	H	G	H	G	G	H	-	H	Y	H	H	G	H	Y	Y	H	H	H	H	G	H	-	H	H	H	H	H	H	Y
AX-183616781	II	0.12	Chr6	555001	2.61e-29	chr6LG2	432028			H	H	H	Y	H	Y	H	Y	G	H	H	H	G	H	G	G	H	Y	H	Y	H	H	G	H	Y	Y	H	H	H	H	G	H	Y	H	H	H	H	H	H	Y
AX-183616782	II	0.12	Chr6	555391	2.61e-29	chr6LG2	431638			H	H	H	Y	H	Y	H	Y	G	H	H	H	G	H	G	G	H	Y	H	Y	H	H	-	H	Y	Y	H	H	H	H	G	H	Y	H	H	H	H	H	H	Y
AX-183871781	II	0.12	Chr6	556669	2.61e-29	chr6LG2	430360			H	H	H	Y	H	Y	H	Y	G	H	H	H	G	H	G	G	H	Y	H	Y	H	H	G	H	Y	Y	H	H	H	H	G	H	Y	H	H	H	H	H	H	Y
AX-183872694	II	0.12	Chr6	557284	2.61e-29	chr6LG2	429745			H	H	H	Y	H	Y	H	Y	G	H	H	H	G	H	G	G	H	Y	H	Y	H	H	G	H	Y	Y	H	H	H	H	G	H	Y	H	H	H	H	H	H	Y
AX-183871248	II	0.12	Chr6	566815	2.61e-29	chr6LG2	420214			H	H	H	Y	H	Y	H	Y	G	H	H	H	G	H	G	G	H	Y	H	Y	H	H	G	H	Y	Y	H	H	H	H	G	H	Y	H	H	H	H	H	H	Y
AX-183883102	II	0.12	Chr6	599469	1.22e-27	chr6LG2	385327			H	H	H	Y	H	Y	H	Y	G	H	H	H	G	H	G	G	H	Y	H	Y	H	H	G	H	Y	Y	H	H	H	H	G	H	Y	H	H	H	H	H	H	Y
AX-183868965	II	0.12	Chr6	600224	1.22e-27	chr6LG2	384572			H	H	H	Y	H	Y	H	Y	G	H	H	H	G	H	G	G	H	Y	H	Y	H	H	G	H	Y	Y	H	H	H	H	G	H	H	H	H	H	H	H	H	Y
AX-183879263	II	0.12	Chr6	600548	1.22e-27	chr6LG2	384248			H	H	H	-	H	Y	H	Y	G	H	H	H	G	H	G	G	-	Y	H	Y	-	H	G	H	Y	Y	H	H	H	H	G	-	Y	H	H	H	H	H	H	Y
AX-183878720	II	0.12	Chr6	602017	2.61e-29	chr6LG2	382779			H	H	H	Y	H	Y	H	Y	G	H	H	H	G	H	G	G	H	Y	H	Y	H	H	G	H	Y	Y	H	H	H	H	G	H	Y	H	H	H	H	H	H	Y
AX-183616795	II	0.12	Chr6	724496	2.61e-29	chr6LG2	261393			H	H	H	Y	H	Y	H	Y	G	H	H	H	G	H	G	G	H	Y	H	Y	H	H	G	H	Y	Y	H	H	H	H	G	H	Y	H	H	H	H	H	H	Y
AX-183616799	II	0.12	Chr6	771326	2.61e-29	chr6LG2	213410			H	H	H	Y	H	Y	H	Y	-	H	H	H	G	H	G	G	H	Y	H	Y	H	H	G	H	Y	Y	H	H	H	H	G	H	Y	H	H	H	H	H	H	Y
AX-183616817	II	0.25	Chr6	803596	2.61e-29	scaffold04771	31221			H	H	H	Y	G	Y	H	Y	G	H	H	H	-	H	G	G	H	Y	H	Y	H	H	G	H	Y	Y	H	H	H	H	G	H	-	H	H	H	H	H	H	Y
AX-183884150	II	0.25	Chr6	806065	2.61e-29	scaffold04771	28752			H	H	H	Y	G	Y	H	Y	G	H	H	H	G	H	G	G	H	Y	H	Y	H	H	G	H	Y	Y	H	H	H	H	H	H	Y	H	H	H	H	H	H	Y
AX-183616816	II	0.25	Chr6	806508	1.22e-27	scaffold04771	28309			H	H	H	Y	G	Y	H	Y	G	H	H	H	G	H	G	G	H	Y	H	Y	H	H	G	H	Y	Y	H	H	H	H	G	H	Y	H	H	H	H	H	H	Y
AX-183579046	II	0.25	Chr6	807786	2.61e-29	scaffold04771	27031			H	H	H	Y	G	Y	H	Y	G	H	H	H	G	H	G	G	H	Y	H	Y	H	H	G	H	Y	Y	H	H	H	H	G	H	Y	H	H	H	H	H	H	Y
AX-183616813	II	0.25	Chr6	809412	1.22e-27	scaffold04771	25405			H	H	H	Y	G	Y	H	Y	G	H	H	H	G	H	G	G	H	Y	H	Y	H	H	G	H	Y	Y	H	H	H	H	G	H	-	H	H	H	H	H	H	Y
AX-183579322	II	0.25	Chr6	958474	1.22e-27	chr6LG2	894645			H	H	H	Y	G	Y	H	Y	G	H	H	H	-	H	G	G	H	-	H	Y	H	H	G	H	Y	Y	H	H	H	H	G	H	Y	H	H	H	H	H	H	Y
AX-183620444	II	0.25	Chr6	969981	1.22e-27	chr6LG2	882747			H	H	H	Y	G	Y	H	Y	G	H	H	H	G	H	G	G	H	Y	H	Y	H	H	G	H	Y	Y	H	H	H	H	G	H	Y	H	H	H	H	H	H	Y
AX-183620441	II	0.25	Chr6	975981	1.22e-27	chr6LG2	876747			H	H	H	Y	G	Y	H	Y	G	H	H	H	G	H	G	G	H	Y	H	Y	H	H	G	H	Y	Y	H	H	H	H	G	H	Y	H	H	H	H	H	H	Y
AX-183579320	II	0.25	Chr6	1029647	1.22e-27	chr6LG2	850973			H	H	H	Y	G	Y	H	Y	G	H	H	H	G	H	G	G	H	-	H	Y	H	H	G	H	Y	Y	H	H	H	H	G	H	Y	H	H	H	H	H	H	Y
AX-183866963	II	0.37	Chr6	1029779	2.63e-24	chr6LG2	850841			H	H	H	Y	G	Y	H	H	G	H	H	H	G	H	G	G	H	-	H	Y	H	H	G	H	Y	Y	H	H	H	H	G	H	H	H	H	H	H	H	H	Y
AX-183890589	II	0.37	Chr6	1207360	1.22e-27	chr6LG2	1049057			H	H	H	Y	G	Y	H	H	G	H	H	H	G	H	H	G	H	Y	H	Y	H	H	G	H	Y	Y	H	H	H	H	G	H	Y	H	H	H	H	H	H	Y
AX-183579029	II	0.37	Chr6	1229408	2.61e-29	chr6LG2	1071832			H	H	H	Y	G	Y	H	Y	G	H	H	H	G	H	G	G	H	Y	H	Y	H	H	G	H	Y	Y	H	H	H	H	G	H	Y	H	H	H	H	H	H	Y
AX-183616604	II	0.37	Chr6	1246134	1.22e-27	chr6LG2	1098357			H	H	H	Y	G	Y	H	Y	G	H	H	H	G	H	G	G	H	-	H	Y	H	H	G	H	Y	Y	H	H	H	H	G	H	Y	H	H	H	H	H	H	Y
AX-183568086	II	0.37	Chr6	1253384	1.22e-27	chr6LG2	1105607			H	H	H	Y	G	Y	H	Y	G	H	H	H	G	H	G	G	H	Y	H	Y	H	H	G	-	Y	Y	H	H	H	H	G	H	Y	H	H	H	H	H	H	Y
AX-183579032	II	0.37	Chr6	1398921	1.22e-27	chr6LG2	1296515			H	H	H	Y	G	Y	H	Y	G	H	H	H	G	H	H	G	H	Y	H	Y	H	H	G	H	Y	Y	H	H	H	H	G	H	Y	H	H	H	H	H	H	Y
AX-183620454	II	0.74	Chr6	876734	2.61e-29	chr6LG2	974839			H	H	H	Y	G	Y	H	Y	G	H	H	H	G	H	G	G	H	Y	H	Y	H	H	G	H	Y	Y	H	H	H	H	G	H	Y	H	H	H	H	H	H	Y
AX-183640049	II	0.74	Chr6	1232697	1.22e-27	chr6LG2	1075121			H	H	H	Y	G	Y	H	Y	G	H	H	H	H	H	G	G	H	Y	H	Y	H	H	G	H	Y	Y	H	H	H	H	G	H	-	H	H	H	H	H	H	Y
AX-183862143	II	1.24	Chr6	1639435	1.22e-27	chr6LG2	1517978			H	H	H	Y	G	Y	H	Y	G	H	H	H	G	H	G	G	H	Y	H	Y	H	H	G	H	Y	Y	H	H	H	H	G	H	Y	H	H	H	H	H	H	Y
AX-183616642	II	1.24	Chr6	1734893	2.61e-29	chr6LG2	2255118			H	H	H	Y	G	Y	H	Y	G	H	H	H	G	H	G	G	H	-	H	Y	H	H	G	H	Y	Y	H	H	H	H	G	H	-	H	H	H	H	H	H	Y
AX-183616644	II	1.24	Chr6	1736185	1.22e-27	chr6LG2	2253826			H	H	H	Y	G	Y	H	Y	G	H	H	H	G	H	G	G	H	Y	H	Y	H	H	G	H	Y	Y	H	H	H	H	G	H	H	H	H	H	H	H	H	Y
AX-183887822	II	1.24	Chr6	1736488	1.22e-27	chr6LG2	2253523			H	H	H	Y	G	Y	H	Y	G	H	H	H	G	H	G	G	H	Y	H	Y	H	H	G	H	Y	Y	H	H	H	H	G	H	Y	H	H	H	H	H	H	Y
AX-183887823	II	1.24	Chr6	1737545	2.61e-29	chr6LG2	2252466			H	H	H	Y	G	Y	H	Y	G	H	H	H	H	H	G	G	H	Y	H	Y	-	H	G	H	Y	Y	H	H	H	H	G	H	-	H	H	H	H	H	H	Y
AX-183616647	II	1.24	Chr6	1737805	1.22e-27	chr6LG2	2252206			H	H	H	Y	G	Y	H	Y	G	H	H	H	G	H	G	G	H	Y	H	Y	H	H	G	H	Y	Y	H	H	H	H	G	H	Y	H	H	H	H	H	H	Y
AX-183616658	II	1.24	Chr6	1783643	2.61e-29	chr6LG2	2206098			H	-	H	Y	G	Y	H	Y	G	H	H	H	G	H	G	G	H	Y	H	Y	H	H	G	H	Y	Y	H	H	H	H	G	H	Y	H	H	H	H	H	H	Y
AX-183884147	II	1.37	Chr6	1790979	1.22e-27	chr6LG2	2198762			H	-	H	Y	G	Y	H	-	G	-	H	H	G	H	G	G	H	H	-	-	H	H	G	H	Y	Y	H	H	H	H	G	-	H	H	-	G	H	-	-	Y
AX-183620347	II	1.37	Chr6	1950930	1.22e-22	chr6LG2	1665124			H	H	H	Y	G	Y	H	-	G	H	H	H	G	H	G	G	H	Y	H	Y	H	H	G	H	Y	Y	H	H	H	H	G	H	H	H	H	H	H	H	H	Y
AX-183620351	II	1.37	Chr6	1963793	5.65e-26	chr6LG2	1670303			H	H	H	Y	G	Y	H	Y	G	H	H	H	G	H	G	G	Y	Y	H	Y	H	H	G	H	Y	Y	H	H	H	H	G	H	H	H	H	H	H	H	H	Y
AX-183568435	II	1.74	Chr6	2285322	1.22e-27	chr6LG2	2030253			H	H	H	-	G	Y	H	Y	G	H	H	H	G	H	G	G	H	H	H	Y	H	H	G	H	Y	H	H	H	H	-	G	H	Y	H	H	-	H	H	H	-
AX-183891907	II	1.86	Chr6	2337530	2.61e-29	chr6LG2	2081732			H	H	H	Y	G	Y	H	Y	G	H	H	H	G	H	G	G	H	Y	H	Y	H	H	G	H	Y	Y	H	H	H	H	G	H	Y	H	H	H	H	H	H	Y
AX-183874953	II	1.86	Chr6	2400378	1.22e-27	chr6LG2	2127206			H	H	H	Y	G	Y	H	Y	G	H	H	H	G	H	G	G	-	Y	-	Y	H	H	G	H	-	-	-	H	H	-	G	H	Y	H	H	H	H	H	H	Y
AX-183860840	II	1.86	Chr6	2401698	1.22e-27	chr6LG2	2128526			H	H	H	Y	G	Y	H	Y	G	H	H	H	-	H	G	G	H	Y	H	Y	H	H	G	H	Y	Y	H	H	H	H	G	H	Y	H	H	H	H	H	H	Y
AX-183568109	II	2.11	Chr6	2636572	1.22e-27	chr6LG2	2522960			H	H	H	Y	G	Y	H	Y	G	H	H	H	G	H	G	G	H	Y	H	Y	H	H	G	H	Y	Y	H	H	H	H	G	H	Y	H	H	H	H	H	H	Y
AX-183616853	II	2.11	Chr6	2637474	1.22e-27	chr6LG2	2522058			H	H	H	Y	G	Y	H	Y	G	H	H	H	G	H	G	G	H	Y	H	Y	H	H	G	H	Y	Y	H	H	H	H	G	H	Y	H	H	H	H	H	H	Y
AX-183579049	II	2.11	Chr6	2659431	1.22e-27	chr6LG2	2499634			H	H	H	Y	G	Y	H	Y	G	H	H	H	G	H	G	G	H	Y	H	Y	H	H	G	H	Y	Y	H	H	H	H	G	H	Y	H	H	H	H	H	H	Y
AX-183616841	II	2.11	Chr6	2738279	2.61e-29	chr6LG2	2420571			H	H	H	Y	G	Y	H	Y	G	H	H	H	G	H	G	G	H	-	H	Y	H	H	G	H	Y	Y	H	H	H	H	G	H	Y	H	H	H	H	H	H	Y
AX-183568108	II	2.11	Chr6	2752321	1.22e-27	chr6LG2	2405883			H	H	H	Y	G	Y	H	Y	G	H	H	H	G	H	G	G	H	Y	H	Y	H	H	G	H	Y	Y	H	H	H	H	G	H	Y	H	H	H	H	H	H	Y
AX-183616839	II	2.11	Chr6	2752479	2.61e-29	chr6LG2	2405725			H	H	H	Y	G	Y	H	Y	G	H	H	H	G	H	G	G	H	-	H	Y	H	H	G	H	Y	Y	H	H	H	H	G	H	-	H	H	H	H	H	H	Y
AX-183894075	II	2.11	Chr6	2759679	2.61e-29	chr6LG2	2389831			H	H	H	Y	G	Y	H	Y	G	H	H	H	G	H	G	G	H	H	H	Y	H	H	G	H	Y	Y	H	H	H	H	G	H	Y	H	H	H	H	H	H	Y
AX-183616838	II	2.11	Chr6	2765792	5.65e-26	chr6LG2	2383702			H	H	H	Y	G	Y	H	H	G	H	H	H	G	H	G	G	H	Y	H	Y	H	H	G	H	Y	Y	H	H	H	H	G	H	H	H	H	H	H	H	H	Y
AX-183890236	II	2.11	Chr6	2867842	1.22e-27	scaffold00347	47721			H	H	H	Y	G	Y	H	Y	G	H	H	H	G	H	G	G	H	-	H	Y	H	H	G	H	Y	Y	H	H	H	H	G	H	-	H	H	H	H	H	H	Y
AX-183632518	II	2.11	Chr6	3041871	2.61e-29	scaffold00347	185204			H	H	H	Y	G	Y	H	Y	G	H	H	H	G	H	G	G	H	Y	H	Y	H	H	-	H	Y	Y	H	H	H	H	G	H	Y	H	H	H	H	H	H	Y
AX-183890592	II	2.36	Chr6	3189328	1.22e-27	chr6LG2	2834107			H	H	-	Y	G	Y	H	Y	G	H	H	H	G	H	G	G	H	-	H	Y	H	H	G	H	Y	Y	H	H	H	H	G	H	Y	H	H	H	H	H	H	Y
AX-183574333	II	2.48	Chr6	3199309	1.22e-27	chr6LG2	2826247			H	H	H	Y	G	Y	H	Y	G	H	H	H	G	H	G	G	H	-	H	H	H	H	G	H	Y	Y	H	H	H	H	G	H	Y	H	H	H	H	H	H	Y
AX-183617069	II	2.73	Chr6	3267596	1.22e-27	chr6LG2	2757130			H	H	H	Y	G	Y	H	Y	G	H	H	H	G	H	G	G	H	Y	H	H	H	H	G	H	Y	Y	H	H	H	H	G	H	-	H	H	H	H	H	H	Y
AX-183892275	II	2.85	Chr6	3282398	1.22e-27	chr6LG2	2741896			H	H	H	Y	G	Y	H	Y	-	H	H	H	G	H	-	G	H	Y	H	-	H	H	-	H	Y	Y	-	H	H	H	G	H	H	H	H	H	H	H	H	Y
AX-183617073	II	2.85	Chr6	3293726	2.61e-29	chr6LG2	2730568			H	H	H	Y	G	Y	H	Y	G	H	H	H	G	H	G	G	H	Y	H	H	H	H	G	H	Y	Y	H	H	H	H	G	H	-	H	H	H	H	H	H	Y
AX-183617028	II	2.85	Chr6	3517473	7.36e-20	chr6LG2	3449327			H	H	H	Y	G	Y	H	Y	G	H	H	H	G	H	G	G	H	Y	H	H	H	H	G	H	Y	Y	H	H	H	H	G	H	Y	H	H	H	H	H	H	Y
AX-183568119	II	2.85	Chr6	3827846	1.22e-27	chr6LG2	3699189			H	H	H	Y	H	Y	H	Y	G	H	H	H	G	-	G	G	H	-	H	H	H	H	G	H	Y	Y	-	H	H	H	G	H	Y	-	H	H	-	H	H	Y
AX-183617004	II	2.85	Chr6	3850413	1.22e-27	chr6LG2	3720946			H	H	H	Y	G	Y	H	Y	G	H	H	H	G	H	G	G	H	-	H	H	H	H	G	H	Y	Y	H	H	H	H	G	H	-	H	H	H	H	H	H	Y
AX-183581820	II	2.85	Chr6	3873621	1.22e-27	chr6LG2	3740498			H	H	H	Y	G	Y	H	Y	G	H	H	H	-	H	G	G	Y	H	H	H	H	H	G	H	-	Y	-	H	H	H	G	H	H	H	H	H	H	H	H	Y
AX-183617000	II	3.1	Chr6	3937993	2.61e-29	chr6LG2	3810694			H	H	H	Y	G	Y	H	Y	G	H	H	H	G	H	G	G	H	-	H	H	H	H	G	H	Y	Y	H	H	H	H	G	H	Y	H	H	H	H	H	H	Y
AX-183636469	II	3.6	Chr6	4294588	1.22e-27	scaffold03831	82409			H	H	H	Y	G	Y	H	Y	G	H	H	H	G	H	H	G	H	Y	H	H	H	H	G	H	Y	Y	H	H	H	H	G	H	Y	H	H	H	H	H	H	Y
AX-183875074	II	3.6	Chr6	4294886	1.22e-27	scaffold03831	82111			H	H	H	Y	G	Y	H	Y	G	H	H	H	G	H	H	G	H	Y	H	H	H	H	G	H	Y	Y	H	H	H	H	G	H	Y	H	H	H	H	H	H	Y
AX-183570541	II	3.6	Chr6	4302496	1.22e-27	scaffold03831	74536			H	H	H	Y	G	Y	H	Y	G	H	H	H	G	H	H	G	H	Y	H	H	H	H	G	H	Y	Y	H	H	H	H	G	H	Y	H	H	H	H	H	H	Y
AX-183879462	II	3.6	Chr6	4368032	5.65e-26	scaffold05121	7049			H	H	H	Y	G	Y	H	Y	G	H	H	H	G	H	H	G	H	Y	H	H	H	H	G	H	Y	Y	H	H	H	H	G	H	-	H	H	H	H	H	H	Y
AX-183871783	II	3.6	Chr6	4479488	2.61e-29	chr6LG2	5894813			H	H	H	Y	G	Y	H	Y	G	H	H	H	G	H	H	G	H	Y	H	H	H	H	G	H	Y	Y	H	H	H	H	G	H	-	H	H	H	H	H	H	Y
AX-183617096	II	3.6	Chr6	4581453	5.65e-26	chr6LG2	5830882			H	H	H	Y	G	Y	H	Y	G	H	H	H	G	H	H	G	H	-	H	H	H	H	G	-	Y	Y	H	H	H	H	G	H	Y	H	H	H	H	H	H	Y
AX-183568137	II	3.85	Chr6	4773435	1.22e-27	chr6LG2	7075815			H	H	H	-	G	Y	H	Y	G	-	H	H	G	H	H	G	H	-	-	H	H	H	G	H	Y	Y	H	H	H	H	G	H	Y	H	H	H	H	H	H	Y
AX-183617140	II	3.85	Chr6	4783962	1.22e-27	chr6LG2	7065149			H	H	H	Y	G	Y	H	Y	G	H	H	H	G	H	H	G	H	Y	H	H	H	H	G	H	Y	Y	H	H	H	H	G	H	Y	H	H	H	H	H	H	Y
AX-183568136	II	3.85	Chr6	4784939	2.61e-29	chr6LG2	7064262			H	H	H	Y	G	Y	H	Y	G	H	H	H	G	H	H	G	H	Y	H	H	H	H	G	H	Y	Y	H	H	H	H	G	H	Y	H	H	H	H	H	H	Y
AX-183640116	II	3.97	Chr6	4866244	1.22e-27	chr6LG2	7007484			H	H	H	Y	G	Y	H	Y	G	H	H	H	G	H	H	G	H	Y	H	H	H	H	G	H	Y	Y	H	H	H	H	G	H	Y	H	H	H	H	H	H	Y
AX-183640114	II	3.97	Chr6	4879717	2.61e-29	chr6LG2	6997004			H	H	H	Y	G	Y	H	Y	G	H	H	H	G	H	H	G	H	Y	H	H	H	H	G	H	Y	Y	H	H	H	H	G	H	H	H	H	H	H	H	H	Y
AX-183640113	II	3.97	Chr6	4888225	2.61e-29	chr6LG2	6985387			H	H	H	Y	G	Y	H	Y	G	H	H	H	G	H	H	G	H	Y	H	H	H	H	G	H	Y	Y	H	H	H	H	-	H	Y	H	H	H	H	H	H	Y
AX-183568133	II	3.97	Chr6	5007543	1.22e-27	chr6LG2	6910339			H	H	H	Y	G	Y	H	Y	G	H	H	H	G	H	H	G	H	Y	H	H	H	H	G	H	Y	Y	H	H	H	H	G	H	Y	H	H	H	H	H	H	Y
AX-183568132	II	4.22	Chr6	5101831	1.22e-27	chr6LG2	6860344			H	H	H	Y	G	Y	H	Y	G	H	H	H	G	H	H	G	H	Y	H	H	H	H	G	H	Y	Y	H	H	H	H	G	H	-	H	H	H	H	H	H	Y
AX-183571845	II	4.22	Chr6	5103309	1.22e-27	chr6LG2	6858823			H	H	H	Y	G	Y	H	Y	G	H	H	H	G	H	H	G	H	Y	H	H	H	H	G	H	Y	Y	H	H	H	H	G	H	Y	H	H	-	H	H	H	Y
AX-183579068	II	4.22	Chr6	5143813	2.61e-29	chr6LG2	6832024			H	H	H	Y	G	Y	H	Y	G	H	H	H	G	H	H	G	H	Y	H	H	H	H	G	H	Y	Y	H	H	H	H	G	H	-	H	H	H	H	H	H	Y
AX-183867596	II	4.22	Chr6	5143898	2.61e-29	chr6LG2	6831939			H	H	H	Y	G	Y	H	Y	G	H	H	H	G	H	H	G	H	-	H	H	H	H	G	H	Y	Y	H	H	H	H	G	H	Y	H	H	H	H	H	H	Y
AX-183566655	II	4.34	Chr6	5173291	1.22e-27	chr4LG4	392878447			H	H	H	Y	G	Y	H	Y	G	H	H	H	G	H	H	G	H	Y	H	H	H	H	G	H	Y	Y	H	H	H	H	G	H	Y	H	H	H	H	H	H	Y
AX-183892904	II	4.34	Chr6	5181126	2.61e-29	chr4LG4	392870673			H	H	H	Y	G	Y	H	Y	G	H	H	H	G	H	H	G	H	H	H	H	H	H	G	H	Y	Y	H	H	H	H	G	H	Y	H	H	H	H	H	H	Y
AX-183568151	II	4.34	Chr6	5262841	1.22e-27	chr6LG2	6042204			H	H	H	Y	G	Y	H	Y	G	H	H	H	G	H	H	G	H	Y	H	H	H	H	G	H	Y	Y	H	H	H	H	G	H	H	H	H	H	H	H	H	Y
AX-183617266	II	4.34	Chr6	5296293	2.61e-29	chr6LG2	6007931			H	H	H	Y	G	Y	H	Y	G	H	H	H	G	H	H	G	H	Y	H	H	H	H	G	H	Y	Y	H	H	H	H	G	H	Y	H	H	H	H	H	H	Y
AX-183579085	II	4.34	Chr6	5296951	1.22e-27	chr6LG2	6007273			H	H	H	Y	G	Y	H	Y	G	H	H	H	G	H	H	G	H	Y	H	H	H	H	G	H	Y	Y	H	H	H	H	G	H	Y	H	H	H	H	H	H	Y
AX-183617270	II	4.34	Chr6	5297175	1.22e-27	chr6LG2	6007049			H	H	H	Y	G	Y	H	Y	G	H	H	H	G	H	H	G	H	Y	H	H	H	H	G	H	Y	Y	H	H	H	H	G	H	H	H	H	H	H	H	H	Y
AX-183877729	II	4.47	Chr6	5344605	1.22e-27	chr6LG2	5959282			H	H	H	Y	G	Y	H	-	G	H	H	H	G	H	H	G	H	Y	H	H	H	H	G	H	Y	Y	H	H	H	H	G	H	H	H	H	H	H	H	H	Y
AX-183579086	II	4.59	Chr6	5349612	1.22e-27	chr6LG2	5954275			H	H	H	Y	G	Y	H	Y	G	H	H	H	G	H	H	G	H	Y	H	H	H	H	G	H	Y	Y	H	H	H	H	G	H	Y	H	H	H	H	H	H	Y
AX-183617275	II	4.59	Chr6	5350096	2.61e-29	chr6LG2	5953791			H	H	H	Y	G	Y	H	Y	G	H	H	H	G	H	H	G	H	Y	H	H	H	H	G	H	Y	Y	H	H	H	H	G	H	Y	H	H	H	H	H	H	Y
AX-183568152	II	4.59	Chr6	5351454	2.61e-29	chr6LG2	5952433			H	H	H	Y	G	Y	H	Y	G	H	H	H	G	H	H	G	H	Y	H	H	H	H	G	H	Y	Y	H	H	H	H	G	H	Y	H	H	H	H	H	H	Y
AX-183617278	II	4.59	Chr6	5352954	1.22e-27	chr6LG2	5950933			H	H	H	Y	G	Y	H	Y	G	H	H	H	-	H	H	G	H	Y	H	H	H	H	G	H	Y	Y	H	H	H	H	G	H	H	H	H	H	H	H	H	Y
AX-183568153	II	4.59	Chr6	5355967	1.22e-27	chr6LG2	5947920			H	H	H	Y	G	Y	H	Y	G	H	H	H	G	H	H	G	H	Y	H	H	H	H	G	H	Y	Y	H	H	H	H	G	H	Y	H	H	H	H	H	H	Y
AX-183579076	II	4.59	Chr6	5434841	2.61e-29	chr6LG2	6257803			H	H	H	Y	G	Y	H	Y	G	H	H	H	G	H	H	G	H	Y	H	H	H	H	G	H	Y	Y	H	H	H	H	G	H	Y	H	H	H	H	H	H	Y
AX-183617152	II	4.59	Chr6	5436595	2.61e-29	chr6LG2	6259557			H	H	H	Y	G	Y	H	Y	G	H	H	H	G	H	H	G	H	Y	H	H	H	H	G	H	Y	Y	H	H	H	H	G	H	Y	H	H	H	H	H	H	Y
AX-183883630	II	4.59	Chr6	5436756	1.22e-27	chr6LG2	6259718			H	H	H	Y	G	Y	H	Y	G	H	H	H	G	H	H	G	H	Y	H	H	H	H	G	H	Y	Y	H	H	H	H	G	H	Y	H	H	H	H	H	H	Y
AX-183886270	II	4.59	Chr6	5438552	2.61e-29	chr6LG2	6261642			H	H	H	Y	G	Y	H	Y	G	H	H	H	G	H	H	G	H	Y	H	H	H	H	G	H	Y	Y	H	H	H	H	G	H	-	H	H	H	H	H	H	Y
AX-183875362	II	4.59	Chr6	5439773	1.22e-27	chr6LG2	6262863			H	H	H	Y	G	Y	H	Y	G	H	H	H	G	H	H	G	H	Y	H	H	H	H	G	H	Y	Y	H	H	H	H	G	H	-	H	H	H	H	H	H	Y
AX-183626695	II	4.72	Chr6	5708069	1.22e-27	chr6LG2	6461565			H	H	H	Y	G	Y	H	Y	G	H	H	H	H	H	H	G	H	Y	H	H	H	H	G	H	Y	Y	H	H	H	H	G	H	Y	H	H	H	H	H	H	Y
AX-183878822	II	4.72	Chr6	5709307	2.61e-29	chr6LG2	6460327			H	H	H	Y	G	Y	H	Y	G	H	H	H	G	H	H	G	H	Y	H	H	H	H	G	H	Y	Y	H	H	H	H	G	H	Y	H	H	H	H	H	H	Y
AX-183626694	II	4.72	Chr6	5710948	1.22e-27	chr6LG2	6458686			H	H	H	Y	G	Y	H	Y	G	H	H	H	G	H	H	G	H	Y	H	H	H	H	G	H	Y	Y	H	H	H	H	G	H	Y	H	H	H	H	H	H	Y
AX-183574340	II	4.72	Chr6	5898831	1.22e-27	chr6LG2	6666194			H	H	H	Y	G	Y	H	-	G	H	H	H	-	H	H	G	H	Y	H	H	H	H	G	H	Y	Y	H	-	H	H	G	H	H	H	Y	H	H	H	H	Y
AX-183883631	II	4.72	Chr6	5899357	2.61e-29	chr6LG2	6665668			H	H	H	Y	G	Y	H	Y	G	H	H	H	G	H	H	G	H	Y	H	H	H	H	G	H	Y	Y	H	H	H	H	G	H	Y	H	H	H	H	H	H	Y
AX-183617166	II	4.72	Chr6	5911024	2.61e-29	chr6LG2	6653444			H	H	H	Y	G	Y	H	Y	G	H	H	H	G	H	H	G	H	Y	-	H	H	H	G	H	Y	Y	H	H	H	H	G	H	H	H	H	H	H	H	H	Y
AX-183617164	II	4.72	Chr6	5922206	2.61e-29	chr6LG2	6642262			H	H	H	Y	G	Y	H	Y	G	H	H	H	G	H	H	G	H	Y	H	H	H	H	G	H	Y	Y	H	H	H	H	G	H	Y	H	H	H	H	H	H	Y
AX-183617160	II	4.72	Chr6	5929838	2.61e-29	chr6LG2	6634630			H	H	H	Y	G	Y	H	Y	G	H	H	H	G	H	H	G	H	Y	H	H	H	H	G	H	Y	Y	H	H	H	H	G	H	Y	H	H	H	H	H	H	Y
AX-183579077	II	4.72	Chr6	5968490	1.22e-27	chr6LG2	6589678			H	H	H	Y	G	Y	H	Y	G	H	H	H	G	H	H	G	H	Y	H	H	H	H	G	H	Y	Y	H	H	H	H	G	H	-	H	H	H	H	H	H	Y
AX-183574339	II	4.96	Chr6	6053880	1.22e-27	chr6LG2	4824437			H	H	H	Y	G	Y	H	Y	G	H	H	H	G	H	H	G	H	Y	H	H	H	H	G	H	Y	Y	H	H	H	H	G	H	Y	H	H	H	H	H	H	Y
AX-183870810	II	4.96	Chr6	6070217	1.22e-27	chr6LG2	4801239			H	H	H	Y	G	Y	H	Y	G	H	H	H	G	H	H	G	H	Y	H	H	H	H	G	H	-	Y	H	H	H	H	G	H	Y	H	H	H	H	H	H	Y
AX-183617117	II	4.96	Chr6	6070248	1.22e-27	chr6LG2	4801208			H	H	H	Y	G	Y	H	Y	G	H	H	H	G	H	H	G	H	Y	H	H	H	H	G	H	Y	Y	H	H	H	H	G	H	Y	H	H	H	H	H	H	Y
AX-183568130	II	4.96	Chr6	6076347	1.22e-27	chr6LG2	4795109			H	H	H	Y	G	Y	H	Y	G	H	H	H	G	H	H	G	H	Y	H	H	H	H	G	H	Y	Y	H	H	H	H	G	H	Y	H	H	H	H	-	H	Y
AX-183617123	II	4.96	Chr6	6136522	2.61e-29	chr6LG2	4739079			H	H	H	Y	G	Y	H	Y	G	H	H	H	G	H	H	G	H	Y	H	H	H	H	G	H	Y	Y	H	H	H	H	G	H	Y	H	H	H	H	H	H	Y
AX-183579067	II	4.96	Chr6	6141292	1.22e-27	chr6LG2	4734309			H	H	H	Y	G	Y	H	H	G	H	H	H	G	H	H	G	H	Y	H	H	H	H	G	Y	Y	Y	H	H	H	H	G	H	Y	H	H	H	H	H	H	Y
AX-183640125	II	4.96	Chr6	6251893	2.61e-29	chr6LG2	4647926			H	H	H	Y	G	Y	H	Y	G	H	H	H	G	H	H	G	H	Y	H	H	H	H	G	H	Y	Y	H	H	H	H	G	H	-	H	H	H	H	H	H	Y
AX-183617245	II	4.96	Chr6	6253390	2.61e-29	chr6LG2	4646429			H	H	H	Y	G	Y	H	Y	G	H	H	H	G	H	H	G	H	-	H	H	H	H	G	H	Y	Y	H	H	H	H	G	H	-	H	H	H	H	H	H	Y
AX-183617253	II	4.96	Chr6	6312286	2.61e-29	chr6LG2	4603238			H	H	H	Y	G	Y	H	-	G	H	H	H	G	H	H	G	H	Y	H	H	H	H	G	H	Y	Y	H	H	H	H	G	H	Y	H	H	H	H	H	H	Y
AX-183888307	II	4.96	Chr6	6314234	2.61e-29	chr6LG2	4601290			H	H	H	Y	G	Y	H	Y	G	H	H	H	G	H	H	G	H	Y	H	H	H	H	G	H	Y	-	H	H	H	H	G	H	Y	H	H	H	H	H	H	Y
AX-183617255	II	4.96	Chr6	6314454	1.22e-27	chr6LG2	4601070			H	H	H	Y	G	Y	H	Y	G	H	H	H	G	H	H	G	H	Y	-	H	H	H	G	H	Y	Y	H	H	H	H	G	H	Y	H	-	H	H	H	H	Y
AX-183891027	II	4.96	Chr6	6314850	1.22e-27	chr6LG2	4600674			H	H	H	Y	G	Y	H	Y	G	H	H	H	G	H	H	G	H	Y	H	H	H	H	G	H	Y	Y	H	H	H	H	G	H	Y	H	H	H	H	H	H	Y
AX-183617256	II	4.96	Chr6	6315215	1.22e-27	chr6LG2	4600309			H	H	H	Y	G	Y	H	Y	G	H	H	H	G	H	H	G	H	-	H	H	H	H	G	H	Y	Y	H	H	H	H	G	H	Y	H	H	H	H	H	H	Y
AX-183579083	II	4.96	Chr6	6317658	2.61e-29	chr6LG2	4597866			H	H	H	Y	G	Y	H	Y	G	H	H	H	G	H	H	G	H	Y	H	H	H	H	G	H	Y	Y	H	H	H	H	G	H	H	H	H	H	H	H	H	Y
AX-183617257	II	4.96	Chr6	6319468	2.61e-29	chr6LG2	4596056			H	H	H	Y	G	Y	H	Y	G	H	H	H	G	H	H	G	H	-	H	H	H	H	G	H	Y	Y	H	H	H	H	G	H	Y	H	H	H	H	H	H	Y
AX-183892991	II	4.96	Chr6	6319573	2.61e-29	chr6LG2	4595951			H	H	H	Y	G	Y	H	Y	G	H	H	H	G	H	H	G	H	Y	H	H	H	H	G	H	Y	Y	H	H	H	H	G	H	Y	H	H	H	H	H	H	Y
AX-183617258	II	4.96	Chr6	6355224	1.22e-27	chr6LG2	4559203			H	H	H	-	G	Y	H	Y	G	H	H	H	G	H	H	G	H	Y	H	H	H	H	G	H	Y	-	Y	H	H	-	G	H	H	H	H	H	H	H	H	Y
AX-183894740	II	4.96	Chr6	6389697	2.61e-29	chr6LG2	4523541			H	H	H	Y	G	Y	H	Y	G	H	H	H	G	H	H	G	H	Y	H	H	H	H	G	H	Y	Y	H	H	H	H	G	H	Y	H	H	H	H	H	H	Y
AX-183568428	II	5.09	Chr6	6688195	1.22e-27	chr6LG2	5262909			H	H	H	Y	G	Y	H	Y	G	H	H	H	G	H	H	G	H	Y	H	H	H	H	G	H	Y	Y	H	H	H	H	G	H	-	H	H	H	H	H	H	Y
AX-183869175	II	5.09	Chr6	6697073	1.22e-27	chr6LG2	5253917			H	H	H	Y	G	Y	H	Y	G	H	H	H	G	H	H	G	H	Y	H	H	H	H	G	H	Y	Y	H	H	H	H	G	H	H	H	H	H	H	H	H	Y
AX-183568429	II	5.09	Chr6	6714921	1.22e-27	chr6LG2	5235855			H	H	H	Y	G	Y	H	Y	G	H	H	H	G	H	H	G	H	-	H	H	H	H	G	H	Y	Y	H	H	H	H	G	H	-	H	H	H	H	H	H	Y
AX-183864644	II	5.09	Chr6	6958927	1.22e-27	chr6LG2	7492620			H	H	H	Y	G	Y	H	Y	G	H	H	H	G	H	H	G	H	Y	H	H	H	H	G	H	Y	Y	H	H	H	H	G	H	Y	H	H	H	H	H	H	Y
AX-183617288	II	5.09	Chr6	6960194	1.22e-27	chr6LG2	7493887			H	H	H	Y	G	Y	H	Y	G	H	H	H	G	H	H	G	H	Y	H	H	H	H	G	H	Y	Y	H	H	H	H	G	H	Y	H	H	H	H	H	H	Y
AX-183620170	II	5.59	Chr6	7393372	2.61e-29	chr6LG2	26413187			H	H	H	Y	G	Y	H	-	G	H	-	H	G	H	H	G	H	Y	-	H	H	H	G	-	Y	-	H	H	H	-	G	H	Y	H	H	H	-	H	H	Y
AX-183568415	II	5.83	Chr6	7581841	1.22e-27	chr6LG2	7768839			H	H	H	Y	G	Y	H	Y	G	H	H	H	G	H	H	G	H	Y	H	H	H	H	G	H	Y	Y	H	H	H	H	G	H	Y	H	H	H	H	H	H	Y
AX-183568414	II	5.83	Chr6	7642656	2.61e-29	chr6LG2	7711386			H	H	H	Y	G	Y	H	Y	G	H	H	H	G	H	H	G	H	Y	H	H	H	H	G	H	Y	Y	H	H	H	H	G	H	Y	H	H	H	H	H	H	Y
AX-183884721	II	5.83	Chr6	7642989	2.61e-29	chr6LG2	7711053			H	H	H	Y	G	Y	H	Y	G	H	H	H	G	H	H	G	H	Y	H	H	H	H	G	H	Y	Y	H	H	H	H	G	H	-	H	H	H	H	H	H	Y
AX-183878760	II	5.83	Chr6	7674214	1.22e-27	chr6LG2	7681121			H	H	H	Y	G	Y	H	Y	G	H	H	H	G	H	H	G	H	Y	H	H	H	H	G	H	Y	Y	H	H	H	H	G	H	Y	H	H	H	H	H	H	Y
AX-183620105	II	5.83	Chr6	7680766	1.22e-27	chr6LG2	7674491			H	H	H	Y	G	Y	H	Y	G	H	H	H	G	H	H	G	H	Y	H	H	H	H	G	H	Y	Y	H	H	H	H	G	H	Y	H	H	H	H	H	H	Y
AX-183620103	II	5.83	Chr6	7683145	1.22e-27	chr6LG2	7672112			H	H	H	Y	G	Y	H	Y	G	H	H	H	G	H	H	G	H	Y	H	H	H	H	G	H	Y	Y	H	H	H	H	H	H	Y	H	H	H	H	H	H	Y
AX-183876789	II	5.83	Chr6	7687431	1.22e-27	chr6LG2	7667826			H	H	H	Y	G	Y	H	Y	G	H	H	H	G	H	H	G	H	Y	H	H	H	H	G	H	Y	Y	H	H	H	H	G	H	Y	H	H	H	H	H	H	Y
AX-183893012	II	5.83	Chr6	7688106	1.22e-27	chr6LG2	7667151			H	G	H	Y	G	Y	H	Y	G	H	H	H	G	H	H	G	H	Y	H	H	H	H	G	H	Y	Y	H	H	H	H	G	H	Y	H	H	H	H	H	H	Y
AX-183620100	II	5.83	Chr6	7716484	1.22e-27	chr6LG2	7639859			H	H	H	Y	G	Y	H	Y	G	H	H	H	G	H	H	G	H	Y	H	H	H	H	G	H	Y	Y	H	H	H	H	G	H	Y	H	H	H	H	H	H	Y
AX-183570309	II	5.83	Chr6	8097633	2.61e-29	scaffold00066	6407			H	H	H	Y	G	Y	H	Y	G	H	H	H	G	H	H	G	H	Y	H	H	H	H	G	-	Y	Y	-	H	H	H	G	H	Y	H	H	H	H	H	H	Y
AX-183889289	II	5.83	Chr6	8115011	1.22e-27	chr6LG2	7440577			H	H	H	Y	G	Y	H	Y	G	H	H	H	G	H	H	G	H	Y	H	H	H	H	G	H	Y	Y	H	H	H	H	G	H	H	H	H	H	H	H	H	Y
AX-183626685	II	5.96	Chr6	8322753	2.61e-29	chr6LG2	7229806			-	H	-	Y	G	Y	H	Y	G	H	H	H	G	-	H	G	H	Y	H	H	H	H	G	H	Y	Y	H	H	H	-	G	H	-	H	-	-	H	H	H	Y
AX-183626686	II	5.96	Chr6	8323226	1.22e-27	chr6LG2	7229333			H	H	H	Y	G	-	H	Y	G	H	H	H	G	H	H	G	H	-	H	H	H	H	G	H	Y	Y	H	H	H	H	G	H	Y	H	H	H	H	H	H	-
AX-183581842	II	6.08	Chr6	8498013	2.61e-29	chr6LG2	8401587			H	G	H	Y	G	Y	H	Y	G	H	H	H	-	H	H	G	H	Y	H	H	H	H	G	H	Y	Y	H	H	H	H	H	-	Y	H	H	H	H	H	H	Y
AX-183871253	II	6.08	Chr6	8504621	2.61e-29	chr6LG2	8394979			H	H	H	Y	G	Y	H	Y	G	H	H	H	G	H	H	G	H	Y	H	H	H	H	G	H	Y	Y	H	H	H	H	G	H	Y	H	H	H	H	H	H	Y
AX-183860592	II	6.08	Chr6	8509323	1.22e-27	chr6LG2	8390277			H	H	H	Y	G	Y	H	Y	G	H	H	H	G	H	H	G	H	Y	H	H	H	H	G	H	Y	Y	H	H	H	H	G	H	Y	H	H	H	H	H	H	Y
AX-183579132	II	6.21	Chr6	8645936	2.61e-29	chr6LG2	8265002			H	H	H	Y	G	Y	H	Y	G	H	H	H	G	H	H	G	H	Y	H	H	H	H	G	H	Y	Y	H	H	H	H	G	H	H	H	H	H	H	H	H	Y
AX-183640187	II	6.33	Chr6	9778178	2.61e-29	chr6LG2	8895939			H	H	H	-	G	Y	H	-	G	H	H	H	-	-	H	G	H	Y	-	-	H	H	G	Y	Y	Y	Y	H	H	H	G	H	Y	H	H	H	H	-	H	Y
AX-183877735	II	6.45	Chr6	8721447	1.22e-27	chr6LG2	8188782			H	H	H	Y	G	Y	H	Y	G	H	H	H	G	-	H	G	H	H	H	H	H	H	-	-	Y	Y	G	H	H	H	G	H	Y	H	H	-	H	H	H	Y
AX-183618095	II	6.45	Chr6	8732219	2.61e-29	chr6LG2	8177949			H	H	H	Y	G	Y	H	Y	G	H	H	H	G	H	H	G	H	Y	H	H	H	H	G	-	Y	Y	H	H	H	H	H	H	Y	H	H	H	H	H	H	Y
AX-183640176	II	6.45	Chr6	8736852	1.22e-27	chr6LG2	8173316			H	H	H	Y	G	Y	H	Y	G	H	H	H	G	H	H	G	H	H	H	H	H	H	G	H	Y	Y	H	H	H	H	G	H	Y	H	H	H	H	H	H	Y
AX-183579129	II	6.58	Chr6	8739992	2.61e-29	chr6LG2	8170176			H	H	H	Y	G	Y	H	Y	G	H	H	H	G	H	H	G	H	-	H	H	H	H	G	H	Y	Y	H	H	H	H	G	H	-	H	H	H	H	H	H	Y
AX-183861594	II	6.58	Chr6	8742138	2.61e-29	chr6LG2	8168030			H	H	H	Y	G	Y	H	Y	G	H	H	H	G	H	H	G	H	Y	H	H	H	H	G	H	Y	Y	H	H	H	H	G	H	Y	H	H	H	H	H	H	Y
AX-183876769	II	6.7	Chr6	8899259	1.22e-27	chr6LG2	8045264			H	H	H	Y	G	Y	H	Y	G	H	H	H	G	H	H	G	H	Y	H	H	H	H	G	H	Y	Y	H	H	H	H	G	H	Y	H	H	H	H	H	H	Y
AX-183876298	II	6.7	Chr6	8915197	2.61e-29	chr6LG2	8026299			H	H	H	Y	G	Y	H	H	G	H	H	H	G	H	H	G	H	Y	H	H	H	H	G	H	Y	Y	H	H	H	H	G	H	Y	H	H	H	H	H	H	Y
AX-183618084	II	6.83	Chr6	8927631	2.61e-29	chr6LG2	8013758			H	H	H	Y	G	Y	H	-	G	H	H	H	G	H	H	G	H	-	H	H	H	H	G	H	Y	Y	H	H	H	H	G	H	H	H	H	H	H	H	H	Y
AX-183636328	II	6.83	Chr6	9063835	1.22e-27	scaffold03715	43278			H	H	H	Y	G	Y	H	-	G	H	H	H	H	H	H	G	H	Y	H	H	H	H	G	H	Y	Y	H	H	H	H	G	H	Y	H	H	H	H	H	H	Y
AX-183884720	II	7.32	Chr6	9470191	2.61e-29	chr6LG2	8658407			H	H	H	Y	G	Y	H	Y	G	H	H	H	G	H	H	G	H	Y	H	H	H	H	G	H	Y	Y	H	H	H	H	G	H	Y	H	H	H	H	H	H	Y
AX-183568376	II	7.32	Chr6	9471233	1.22e-27	chr6LG2	8657365			H	H	H	Y	G	Y	H	Y	G	H	H	H	G	H	H	G	H	Y	H	H	H	H	G	H	Y	Y	H	H	H	H	G	H	Y	H	H	H	H	H	H	Y
AX-183876786	II	7.32	Chr6	9471302	1.22e-27	chr6LG2	8657296			H	H	H	Y	G	Y	H	Y	G	H	H	H	G	H	H	G	H	Y	H	H	H	H	G	H	Y	Y	H	H	H	H	G	H	Y	H	H	H	H	H	H	Y
AX-183618231	II	7.45	Chr6	9749350	2.61e-29	chr6LG2	8921552			H	H	H	Y	G	Y	H	Y	G	H	H	H	G	H	H	G	H	H	H	H	H	H	G	H	Y	Y	H	H	H	H	G	H	Y	H	H	H	H	H	H	Y
AX-183581843	II	7.45	Chr6	9768204	2.61e-29	chr6LG2	8905913			H	H	H	Y	G	Y	H	Y	G	H	H	H	G	H	H	G	H	Y	H	H	H	H	G	H	Y	Y	H	H	H	H	G	H	Y	H	H	H	H	H	H	Y
AX-183640192	II	7.45	Chr6	9770116	2.61e-29	chr6LG2	8904001			H	H	H	Y	G	Y	H	Y	G	H	H	H	G	H	H	G	H	Y	H	H	H	H	G	H	Y	Y	H	H	H	H	G	H	Y	H	H	H	H	H	H	Y
AX-183568249	II	7.45	Chr6	9815857	2.61e-29	scaffold05857	15139			H	H	H	Y	G	Y	H	Y	G	H	H	H	G	H	H	G	H	Y	H	H	H	H	G	H	Y	Y	H	H	H	H	G	H	Y	H	H	H	H	H	H	Y
AX-183618577	II	7.45	Chr6	9819706	1.22e-27	scaffold05857	11290			H	H	H	Y	G	Y	H	Y	G	H	H	H	G	H	H	G	H	Y	H	H	H	H	G	H	Y	Y	H	H	H	H	G	H	Y	H	H	H	H	H	H	Y
AX-183568270	II	7.45	Chr6	9859971	1.22e-27	chr6LG2	8713012			H	H	H	Y	G	Y	H	-	G	H	H	H	G	H	-	G	H	H	H	H	H	H	G	H	Y	Y	H	H	H	H	-	H	-	H	H	H	H	H	H	Y
AX-183579187	II	7.45	Chr6	9862650	2.61e-29	chr6LG2	8715691			H	H	H	Y	G	Y	H	Y	G	H	H	H	G	H	H	G	H	Y	H	H	H	H	G	H	Y	Y	H	H	H	H	G	H	Y	H	H	H	H	H	H	Y
AX-183870480	II	7.57	Chr6	9252329	2.61e-29	scaffold02707	85793			H	H	H	Y	G	Y	H	-	G	H	H	H	G	H	H	G	H	-	H	H	H	H	G	H	Y	Y	H	H	H	-	G	H	-	H	H	H	H	H	H	Y
AX-183568375	II	7.57	Chr6	9524228	2.61e-29	chr6LG2	8604099			H	H	H	Y	G	Y	H	Y	G	-	H	H	G	H	H	G	H	-	H	H	H	H	G	H	Y	Y	H	H	H	H	H	H	Y	H	H	H	H	H	H	-
AX-183581866	II	8.19	Chr6	10325257	1.22e-27	chr6LG2	9253100			H	H	H	Y	G	Y	H	Y	G	H	H	H	G	H	H	G	H	Y	H	H	H	H	G	H	Y	Y	H	H	H	H	G	H	H	H	H	H	H	H	H	Y
AX-183618933	II	8.44	Chr6	10496393	1.22e-27	chr6LG2	8786088			H	H	H	Y	G	-	H	Y	G	H	H	H	-	H	H	G	H	Y	H	H	H	H	G	H	Y	Y	H	H	H	-	-	H	H	H	H	H	H	H	H	Y
AX-183866142	II	8.57	Chr6	10661476	2.61e-29	chr6LG2	9164847			H	H	H	Y	G	Y	H	Y	G	H	H	H	G	H	H	G	H	Y	H	H	H	H	G	H	Y	Y	H	H	H	H	G	H	Y	H	H	H	H	H	H	Y
AX-183581865	II	8.57	Chr6	10777282	1.22e-27	chr6LG2	9051495			H	H	H	Y	G	Y	H	Y	G	H	H	H	G	H	H	G	H	Y	H	H	H	H	G	H	Y	Y	H	H	H	H	G	H	Y	H	H	H	H	H	H	Y
AX-183861095	II	8.81	Chr6	11034020	2.61e-29	scaffold02139	211246			H	H	H	Y	G	Y	H	Y	G	H	H	H	G	H	H	G	H	Y	H	H	H	H	G	-	Y	Y	H	H	H	H	G	H	-	H	H	H	H	H	H	Y
AX-183640282	II	8.94	Chr6	11097747	2.61e-29	scaffold02139	275780			H	H	H	Y	G	Y	H	Y	G	H	H	H	G	H	H	G	H	H	H	H	H	H	G	H	Y	Y	H	H	H	H	G	H	Y	H	H	H	H	H	H	Y
AX-183873559	II	8.94	Chr6	11323709	1.22e-27	chr2LG1	237310781			H	H	H	Y	G	Y	H	Y	G	H	H	H	G	H	H	G	H	H	H	H	H	H	G	H	Y	Y	H	H	H	H	G	H	Y	H	H	H	H	H	H	Y
AX-183869539	II	8.94	Chr6	11366232	2.61e-29	chr7LG7	426566778			H	H	H	Y	G	Y	H	-	G	H	-	H	G	H	H	G	H	H	-	H	H	H	G	H	Y	Y	-	-	H	H	G	H	Y	H	H	H	H	H	H	Y
AX-183878745	II	8.94	Chr6	11381465	1.22e-27	scaffold03398	137822			H	H	H	Y	G	Y	H	Y	G	H	H	H	G	H	H	G	H	H	H	H	H	H	G	H	Y	Y	H	H	H	H	G	H	H	H	H	H	H	H	H	Y
AX-183619031	II	8.94	Chr6	11395194	1.22e-27	scaffold03398	124125			H	H	H	Y	G	Y	H	Y	G	H	H	H	G	H	H	G	H	H	H	H	H	H	G	H	Y	Y	H	H	H	-	G	H	Y	H	H	H	H	H	H	Y
AX-183619030	II	8.94	Chr6	11395775	1.22e-27	scaffold03398	123544			H	H	H	Y	G	Y	H	Y	G	H	H	H	G	H	H	G	H	H	H	H	H	H	G	H	Y	Y	Y	H	H	H	G	H	-	H	H	H	H	H	H	Y
AX-183887841	II	8.94	Chr6	11400475	1.22e-27	scaffold03398	118844			H	H	H	Y	G	Y	H	Y	G	H	H	H	G	H	H	G	H	H	H	H	H	H	G	H	Y	Y	H	H	H	H	G	H	Y	H	H	H	H	H	H	Y
AX-183876307	II	9.19	Chr6	11419024	2.61e-29	scaffold03398	100417			H	H	H	Y	G	Y	H	Y	G	H	H	H	G	H	H	G	H	H	H	H	H	H	G	H	Y	Y	H	H	H	H	G	H	Y	H	H	H	H	H	H	Y
AX-183619026	II	9.19	Chr6	11459676	1.22e-27	scaffold03398	34012			H	H	H	Y	G	Y	H	-	G	H	H	H	G	H	H	G	H	H	H	H	H	H	G	H	Y	Y	H	H	H	H	G	H	Y	H	H	H	H	H	H	Y
AX-183884170	II	9.19	Chr6	11619544	1.22e-27	chr6LG2	10499074			H	H	H	Y	G	Y	H	Y	G	H	H	H	G	H	H	G	H	H	H	H	H	H	G	H	Y	Y	H	H	H	H	-	H	Y	H	H	H	H	H	H	Y
AX-183568293	II	9.31	Chr6	11698849	2.61e-29	chr6LG2	10580264			H	H	H	Y	G	Y	H	Y	G	H	H	H	G	H	H	G	H	H	H	H	H	H	G	H	Y	Y	H	H	H	H	G	H	Y	H	H	H	H	H	H	Y
AX-183868969	II	9.56	Chr6	11776361	2.61e-29	chr6LG2	10658234			H	H	H	Y	G	Y	H	Y	G	H	H	H	H	H	H	-	-	H	H	H	H	H	G	H	Y	Y	H	H	H	H	G	H	Y	H	H	H	H	H	H	Y
AX-183871528	II	9.81	Chr6	12097052	2.61e-29	chr6LG2	10946014			H	H	H	Y	G	Y	H	Y	G	H	H	H	G	H	H	G	H	H	H	H	H	H	G	H	Y	Y	H	H	H	H	H	H	Y	H	H	H	H	H	H	Y
AX-183619115	II	9.81	Chr6	12097074	1.22e-27	chr6LG2	10946036			H	H	H	Y	G	Y	H	Y	G	H	H	H	G	H	H	G	H	H	H	H	H	H	G	H	Y	Y	H	H	H	H	H	H	Y	H	H	H	H	H	H	Y
AX-183579465	II	9.93	Chr6	12261928	1.22e-27	chr6LG2	10058799			H	H	H	Y	G	Y	H	Y	G	H	H	H	G	H	H	G	H	H	H	H	H	H	G	H	Y	Y	H	H	H	H	H	H	Y	H	H	H	H	H	H	Y
AX-183868182	II	10.05	Chr6	12516710	2.61e-29	chr6LG2	10296251			H	H	H	Y	G	Y	H	Y	G	H	H	H	G	H	H	G	H	H	H	H	H	H	G	H	Y	Y	H	H	H	H	H	H	Y	H	H	H	H	H	H	Y
AX-183881013	II	10.05	Chr6	12654266	1.22e-27	scaffold02786	103203			H	H	H	Y	G	Y	H	Y	G	H	H	H	G	H	H	G	H	H	H	H	H	H	G	H	Y	Y	H	H	H	H	H	H	Y	H	H	H	H	H	H	Y
AX-183886963	II	10.18	Chr6	12654519	1.22e-27	scaffold02786	103456			H	H	H	Y	G	Y	H	Y	G	H	H	H	H	H	H	G	H	H	H	H	H	H	G	-	Y	Y	H	H	H	H	H	H	H	H	H	H	H	H	H	Y
AX-183877748	II	10.18	Chr6	12844836	2.61e-29	chr6LG2	11117728			H	H	H	Y	G	Y	H	Y	G	H	H	H	-	H	H	G	H	H	H	H	H	H	G	H	Y	Y	H	H	H	H	H	H	Y	H	H	H	H	H	H	Y
AX-183619340	II	10.18	Chr6	12846454	1.22e-27	chr6LG2	11119346			H	H	H	Y	G	Y	H	Y	G	H	H	H	G	H	H	G	H	H	H	H	H	H	G	H	Y	Y	H	H	H	H	H	H	Y	H	H	H	H	H	H	Y
AX-183619201	II	10.67	Chr6	13320979	1.22e-27	chr6LG2	11614546			H	H	H	Y	G	Y	H	Y	G	H	H	H	G	H	H	G	H	H	H	H	H	H	G	H	Y	Y	H	H	H	H	H	H	Y	H	H	H	H	H	H	Y
AX-183887367	II	10.67	Chr6	13568148	2.61e-29	chr6LG2	11911137			H	H	H	Y	G	Y	H	Y	G	H	H	H	G	H	H	G	H	H	H	H	H	H	G	H	Y	Y	H	H	H	H	H	H	Y	H	H	H	H	H	H	Y
AX-183619289	II	10.92	Chr6	13694851	1.22e-27	chr6LG2	11785809			H	H	H	Y	G	Y	H	Y	G	H	H	H	G	H	H	G	H	H	H	H	H	H	G	H	Y	Y	H	H	H	H	H	H	Y	H	H	H	H	H	H	Y
AX-183619288	II	10.92	Chr6	13695475	1.22e-27	chr6LG2	11785185			H	H	H	Y	G	Y	H	Y	G	H	H	H	G	H	H	G	H	H	H	H	H	H	G	H	Y	Y	H	H	H	H	H	H	-	H	H	H	H	H	H	Y
AX-183885794	II	10.92	Chr6	13736705	2.61e-29	chr6LG2	11755274			H	H	H	Y	G	Y	H	H	G	H	H	H	G	H	H	G	H	H	H	H	H	H	G	H	Y	Y	H	H	H	H	H	H	H	H	H	H	H	H	H	Y
AX-183568313	II	10.92	Chr6	13740061	2.61e-29	chr6LG2	11751918			H	H	H	Y	G	Y	H	Y	G	H	H	H	G	H	H	G	H	H	H	H	H	H	G	H	Y	Y	H	H	H	H	H	H	Y	H	H	H	H	H	H	Y
AX-183619287	II	10.92	Chr6	13742618	2.61e-29	chr6LG2	11749361			H	H	H	Y	G	Y	H	Y	G	H	H	H	G	H	H	G	H	H	H	H	H	H	G	H	Y	Y	H	H	H	H	H	H	H	H	H	H	H	H	H	Y
AX-183640305	II	10.92	Chr6	13749402	1.22e-27	chr6LG2	11742577			H	H	H	Y	G	Y	H	Y	G	H	H	H	G	H	H	G	H	H	H	H	H	H	-	H	Y	Y	H	H	H	H	H	H	Y	H	H	H	H	H	H	Y
AX-183619285	II	10.92	Chr6	13762119	2.61e-29	chr6LG2	11729975			H	H	H	Y	G	Y	H	Y	G	H	H	H	G	H	H	G	H	H	H	H	H	H	G	H	Y	Y	H	H	H	H	H	H	Y	H	H	H	H	H	H	Y
AX-183579220	II	11.05	Chr6	13822157	2.61e-29	chr6LG2	11675629			H	H	H	Y	G	Y	H	Y	G	H	H	H	G	H	H	G	H	H	H	H	H	H	G	H	Y	H	H	H	H	H	H	H	Y	H	H	H	H	H	H	Y
AX-183579215	II	11.05	Chr6	13918467	1.22e-27	chr6LG2	13873755			H	H	H	Y	G	Y	H	Y	G	H	H	H	H	H	H	G	H	H	H	H	H	H	G	H	Y	H	H	H	H	H	H	H	Y	H	H	H	H	H	H	Y
AX-183568305	II	11.05	Chr6	14047879	1.22e-27	chr6LG2	13741294			H	H	H	Y	G	Y	H	Y	G	H	H	H	G	H	H	G	H	H	H	H	H	H	G	H	Y	H	H	H	H	H	H	H	-	H	H	H	H	H	H	Y
AX-183868173	II	11.05	Chr6	14048222	1.22e-27	chr6LG2	13740951			H	H	H	Y	G	Y	H	Y	G	H	H	H	G	H	H	G	H	H	H	-	H	H	G	H	Y	H	H	H	H	H	H	H	H	H	H	H	H	H	H	Y
AX-183619244	II	11.05	Chr6	14052097	1.22e-27	chr6LG2	13737076			H	H	H	Y	G	Y	H	Y	G	H	H	H	G	H	H	G	H	H	H	H	H	H	G	H	Y	H	H	H	H	H	H	H	-	H	H	H	H	H	H	Y
AX-183619240	II	11.17	Chr6	14167622	1.22e-27	chr6LG2	13638560			H	H	H	Y	G	Y	H	Y	G	H	H	H	-	H	H	G	H	H	H	H	H	H	G	-	H	H	H	H	H	H	H	-	H	H	H	H	H	H	H	Y
AX-183876781	II	11.17	Chr6	14187607	1.22e-27	chr6LG2	13616609			H	H	H	Y	G	-	H	H	G	H	H	H	G	H	H	G	H	H	H	H	H	H	G	H	H	H	H	H	H	H	G	H	H	H	H	H	H	H	H	Y
AX-183880847	II	11.17	Chr6	14188593	1.22e-27	chr6LG2	13615623			H	H	H	Y	G	Y	H	Y	G	H	H	H	G	H	H	G	H	H	H	H	H	H	G	H	H	H	H	H	H	H	H	H	H	H	H	H	H	H	H	Y
AX-183861085	II	11.17	Chr6	14199150	1.22e-27	chr6LG2	13605066			H	H	H	Y	G	Y	H	Y	G	H	H	H	G	H	H	G	H	H	H	H	H	H	G	H	H	H	H	H	H	H	H	H	-	H	H	H	H	H	H	Y
AX-183870823	II	11.42	Chr6	14276422	1.22e-27	chr6LG2	13533542			H	H	H	Y	G	Y	H	Y	G	H	H	H	G	H	H	G	H	H	H	H	H	H	G	H	H	H	-	H	H	H	H	H	H	H	H	H	H	H	H	Y
AX-183568302	II	11.42	Chr6	14278734	2.61e-29	chr6LG2	13531230			H	H	H	Y	G	Y	H	Y	G	H	H	H	G	H	H	G	H	H	H	H	H	H	G	H	H	H	H	H	H	H	H	H	-	H	H	H	H	H	H	Y
AX-183619229	II	11.42	Chr6	14283054	1.22e-27	chr6LG2	13526910			H	H	H	Y	G	Y	H	Y	G	H	H	H	G	H	H	G	H	H	H	H	H	H	G	H	H	H	H	H	H	H	H	H	Y	H	H	H	H	H	H	Y
AX-183865068	II	11.42	Chr6	14485577	1.22e-27	chr6LG2	13370417			H	H	H	Y	G	Y	H	Y	G	H	H	H	G	H	H	G	H	H	H	H	H	H	G	H	H	H	H	-	H	H	H	H	Y	H	H	H	H	H	H	Y
AX-183574368	II	11.42	Chr6	14573616	2.61e-29	chr6LG2	13288328			H	H	H	Y	G	Y	H	Y	G	H	H	H	G	H	H	G	H	H	H	H	H	H	G	H	H	H	H	H	H	H	H	H	Y	H	H	H	H	H	H	Y
AX-183862033	II	11.42	Chr6	14574942	1.22e-27	chr6LG2	13287002			H	-	H	Y	G	Y	H	Y	G	H	H	H	G	H	H	G	H	H	H	H	H	H	G	H	H	-	H	H	H	H	H	H	Y	H	H	H	H	H	H	Y
AX-183574366	II	11.54	Chr6	14633339	1.22e-27	chr6LG2	13228187			H	H	H	Y	G	Y	H	Y	G	H	H	H	-	H	H	G	H	H	H	H	H	H	G	H	H	H	H	H	H	H	H	H	H	H	H	H	H	H	H	Y
AX-183619066	II	11.67	Chr6	15884924	1.22e-27	chr6LG2	13196281			H	-	H	Y	G	Y	H	Y	G	H	H	H	G	H	H	G	H	H	H	H	H	H	G	H	H	H	H	H	H	H	H	H	-	H	H	H	H	H	H	Y
AX-183579198	II	11.92	Chr6	16044321	1.22e-27	chr6LG2	13024832			H	H	H	Y	G	Y	H	-	G	H	H	H	G	H	H	G	H	H	H	H	H	H	G	H	H	H	H	H	H	H	H	H	Y	H	H	H	H	H	H	Y
AX-183876779	II	12.16	Chr6	16131503	1.22e-27	chr6LG2	12933949			H	H	H	Y	G	Y	G	-	G	H	H	H	H	H	H	G	H	H	H	H	H	H	G	-	H	H	H	H	H	H	-	H	H	-	H	H	H	H	H	-
AX-183619081	II	12.41	Chr6	16142389	2.61e-29	chr6LG2	12923071			H	H	H	Y	G	Y	H	Y	G	H	H	H	G	H	H	G	H	H	H	H	H	H	G	H	H	H	H	H	H	H	H	H	Y	H	H	H	H	H	H	Y
AX-183619083	II	12.41	Chr6	16160735	1.22e-27	chr6LG2	12904753			H	H	H	Y	G	Y	H	Y	G	H	H	H	G	H	H	G	H	H	-	H	H	H	G	H	H	H	H	H	H	H	H	H	-	H	H	H	H	H	H	Y
AX-183871261	II	12.41	Chr6	16253396	2.61e-29	chr6LG2	12811585			H	H	H	Y	G	Y	H	Y	G	H	H	H	G	H	H	G	H	H	H	H	H	H	G	H	H	H	H	H	H	H	H	H	Y	H	H	H	H	H	H	Y
AX-183619095	II	13.16	Chr6	16546502	5.65e-26	chr6LG2	12586463			H	H	H	Y	G	Y	H	Y	H	H	H	H	G	H	H	G	H	H	H	H	H	H	G	H	G	H	H	H	H	H	H	H	-	H	H	H	H	H	H	Y
AX-183875377	II	13.16	Chr6	16675954	2.63e-24	chr6LG2	12418176			H	H	H	Y	G	Y	H	Y	H	H	H	H	G	H	H	G	H	H	H	H	H	H	G	H	G	H	H	H	H	H	H	H	-	H	H	H	H	H	H	Y
AX-183640286	II	13.16	Chr6	16726228	1.22e-27	chr6LG2	12417714			H	H	H	Y	G	Y	H	Y	H	H	H	H	G	H	H	G	H	H	H	H	H	H	G	H	G	H	H	H	H	H	H	H	-	H	H	H	H	H	H	Y
AX-183881413	II	13.28	Chr6	16841425	2.63e-24	chr6LG2	12385254			H	H	H	Y	G	Y	H	Y	H	H	H	H	G	H	H	G	H	H	H	H	H	H	G	H	G	H	H	H	H	H	H	H	-	H	H	H	H	H	H	Y
AX-183568324	II	13.78	Chr6	17403028	2.61e-29	chr6LG2	13968734			H	H	H	Y	G	Y	H	Y	H	H	H	H	G	H	H	G	H	H	H	H	H	H	G	H	G	H	H	H	H	H	H	H	Y	H	H	H	H	H	H	Y
AX-183891896	II	13.78	Chr6	17432969	2.61e-29	chr6LG2	13997451			H	H	H	Y	G	Y	H	Y	H	H	H	H	G	H	H	G	H	H	H	H	H	H	G	H	G	H	H	H	H	H	H	H	H	H	H	H	H	H	H	Y
AX-183640316	II	13.78	Chr6	17438607	2.61e-29	chr6LG2	14003089			H	H	H	Y	G	Y	H	Y	H	H	H	H	G	H	H	G	H	H	H	H	H	H	G	H	G	H	H	H	H	H	H	H	Y	H	H	H	H	H	H	Y
AX-183888786	II	13.78	Chr6	17441299	2.61e-29	chr6LG2	14005781			H	H	H	Y	G	Y	H	-	H	H	H	H	G	H	H	G	H	H	H	H	H	H	G	H	G	H	H	H	H	H	H	H	Y	H	H	H	H	H	H	Y
AX-183635531	II	14.03	Chr6	17588876	2.61e-29	scaffold02883	134372			H	H	H	Y	G	Y	H	Y	H	H	H	H	G	H	H	G	H	H	Y	H	H	H	G	H	H	H	H	-	H	H	H	H	-	H	H	H	H	H	H	Y
AX-183884788	II	14.53	Chr6	17917784	2.61e-29	scaffold01648	3346			H	H	H	Y	G	Y	H	Y	H	H	H	H	G	-	H	G	H	H	Y	H	H	G	G	H	G	H	H	H	H	H	H	H	-	H	H	-	H	H	H	Y
AX-183626663	II	14.53	Chr6	17935423	1.22e-27	scaffold01648	20842			H	-	H	Y	G	Y	H	Y	H	H	H	H	-	H	H	G	H	-	-	H	-	G	G	-	G	H	H	H	H	H	H	H	H	H	H	H	H	H	H	Y
AX-183626647	II	15.02	Chr6	18167629	1.22e-27	super-scaffold4454	323979			H	Y	H	Y	G	Y	H	Y	H	H	H	H	-	H	H	G	H	H	Y	H	H	G	G	H	G	H	-	H	H	H	H	H	Y	H	H	H	H	H	H	Y
AX-183626646	II	15.02	Chr6	18168203	2.61e-29	super-scaffold4454	323405			H	H	H	Y	G	Y	H	Y	H	H	H	H	G	H	H	G	H	H	Y	H	H	G	G	H	G	H	H	H	H	H	H	H	-	H	H	H	H	H	H	Y
AX-183884247	II	15.02	Chr6	18168278	1.22e-27	super-scaffold4454	323330			H	H	H	Y	G	Y	H	Y	H	H	H	H	G	H	H	G	H	H	Y	H	H	G	G	H	G	H	H	H	H	H	H	H	-	H	H	H	H	H	H	Y
AX-183626645	II	15.02	Chr6	18169705	1.22e-27	super-scaffold4454	321903			H	H	H	Y	G	Y	H	Y	H	H	H	H	G	H	H	G	H	H	Y	H	H	G	G	H	G	H	H	H	H	H	H	H	Y	H	H	H	H	H	H	Y
AX-183883201	II	15.15	Chr6	18357697	1.22e-27	super-scaffold4454	135495			H	H	H	Y	G	Y	H	Y	H	H	H	H	G	H	H	G	H	H	Y	H	H	G	G	H	G	H	H	H	H	H	H	H	H	H	H	H	H	H	H	Y
AX-183574513	II	15.15	Chr6	18808063	2.61e-29	chr6LG2	14513006			H	H	H	Y	G	Y	H	Y	H	H	H	H	G	H	H	G	H	H	Y	H	H	G	G	H	G	H	H	H	H	H	H	H	Y	H	H	H	H	H	H	Y
AX-183883725	II	15.15	Chr6	18809780	1.22e-27	chr6LG2	14514723			H	H	H	Y	G	Y	H	Y	H	H	H	H	G	H	H	G	H	G	Y	H	H	G	G	H	G	H	H	H	H	H	H	H	Y	H	H	H	H	H	-	Y
AX-183626588	II	15.15	Chr6	18981357	1.22e-27	chr6LG2	14294082			H	H	H	Y	G	Y	H	Y	H	H	H	H	-	H	H	G	H	H	Y	H	H	G	G	H	G	H	H	H	H	H	H	H	H	H	H	H	H	H	H	Y
AX-183579878	II	15.15	Chr6	18984909	1.22e-27	chr6LG2	14290530			H	H	H	Y	G	Y	H	Y	H	H	H	H	G	H	H	G	H	H	Y	H	H	G	G	H	G	H	H	H	H	H	H	H	Y	H	H	H	H	H	H	Y
AX-183626582	II	15.15	Chr6	19079986	1.22e-27	chr6LG2	14208490			H	H	H	Y	G	Y	H	Y	H	H	H	H	G	H	H	G	H	H	Y	H	H	G	G	H	G	H	H	H	H	H	H	H	H	H	H	H	H	H	H	Y
AX-183626581	II	15.15	Chr6	19106279	2.61e-29	chr6LG2	14185133			H	H	H	Y	G	Y	H	Y	H	H	H	H	G	H	H	G	H	H	Y	H	H	G	G	H	G	H	H	H	H	H	H	H	Y	H	H	H	H	H	H	Y
AX-183882100	II	15.27	Chr6	19118519	1.22e-27	chr6LG2	14172893			H	H	H	Y	G	Y	H	Y	H	H	H	H	G	H	H	G	H	H	Y	H	H	G	G	H	G	H	H	H	H	H	H	H	-	H	H	H	H	H	H	Y
AX-183619403	II	15.27	Chr6	19279468	1.22e-27	chr6LG2	15001225			H	H	H	Y	G	-	H	Y	H	H	H	H	-	H	H	G	H	H	-	H	H	G	G	H	G	H	H	H	H	H	H	H	H	H	H	H	H	H	H	Y
AX-183619398	II	15.27	Chr6	19284431	2.61e-29	chr6LG2	14996262			H	H	H	Y	G	Y	H	Y	H	H	H	H	G	H	H	G	H	H	Y	H	H	G	G	H	G	H	H	H	H	H	H	H	Y	H	H	H	H	H	H	Y
AX-183619396	II	15.27	Chr6	19286841	2.61e-29	chr6LG2	14993852			H	H	H	Y	G	Y	H	Y	H	H	H	H	G	H	H	G	H	H	Y	H	H	G	G	H	G	H	H	H	H	H	H	H	Y	H	H	H	H	H	H	Y
AX-183579880	II	15.27	Chr6	19651141	1.22e-27	chr6LG2	14644870			H	H	H	Y	G	Y	H	Y	H	H	H	H	G	H	H	G	H	H	Y	H	H	G	G	-	G	H	H	H	H	H	H	H	H	H	H	H	H	H	H	Y
AX-183568328	II	15.4	Chr6	19859473	2.61e-29	chr6LG2	15049678			H	H	H	Y	G	Y	H	Y	H	H	H	H	G	H	H	G	H	H	Y	H	H	G	G	H	G	H	H	H	H	H	H	H	Y	H	Y	H	H	H	H	Y
AX-183618824	II	15.4	Chr6	19919562	2.61e-29	chr6LG2	15981122			H	H	H	Y	G	Y	H	Y	H	H	H	H	G	H	H	G	H	H	Y	H	H	G	G	H	G	H	H	H	H	H	H	H	Y	H	Y	H	H	H	H	Y
AX-183883647	II	15.4	Chr6	19957054	2.61e-29	chr6LG2	15943896			H	H	H	Y	G	Y	H	Y	H	H	H	H	G	H	H	G	H	H	Y	H	H	G	G	H	G	H	H	H	H	H	H	H	Y	H	Y	H	H	H	H	Y
AX-183568265	II	15.4	Chr6	20072469	2.61e-29	chr6LG2	15862040			H	H	H	Y	G	Y	H	Y	H	H	H	H	G	H	H	G	H	H	Y	H	H	G	G	H	G	H	H	H	H	H	H	H	Y	H	Y	H	H	H	H	Y
AX-183640245	II	15.4	Chr6	20154972	1.22e-27	chr6LG2	15777003			H	H	H	Y	G	Y	H	Y	H	H	H	H	G	H	H	G	H	H	Y	H	H	G	G	H	G	H	H	H	H	H	H	H	Y	H	Y	H	H	H	H	Y
AX-183618829	II	15.4	Chr6	20158749	2.61e-29	chr6LG2	15773226			H	H	H	Y	G	Y	H	Y	H	H	H	H	G	H	H	G	H	H	Y	H	H	G	G	H	G	H	H	H	H	H	H	H	Y	H	Y	H	H	H	H	Y
AX-183640247	II	15.4	Chr6	20161922	1.22e-27	chr6LG2	15770053			H	H	H	Y	G	Y	H	Y	H	H	H	H	G	H	H	G	H	H	Y	H	H	G	G	H	G	H	H	H	H	H	H	H	Y	H	Y	H	H	H	H	Y
AX-183640248	II	15.4	Chr6	20197711	2.61e-29	chr6LG2	15744864			H	H	H	Y	G	Y	H	Y	H	H	H	H	G	H	H	G	H	H	Y	H	H	G	G	H	G	H	H	H	H	H	H	H	Y	H	Y	H	H	H	H	Y
AX-183579181	II	15.4	Chr6	20250824	1.22e-27	chr6LG2	15691994			H	H	H	Y	G	Y	H	Y	H	H	H	H	G	H	H	G	H	H	Y	H	H	G	G	H	G	H	H	H	H	H	H	H	-	H	Y	H	H	H	H	Y
AX-183860591	II	15.4	Chr6	20250977	2.61e-29	chr6LG2	15691841			H	H	H	Y	G	Y	H	Y	H	H	H	H	G	H	H	G	H	H	Y	H	H	G	G	H	G	H	H	H	H	H	H	H	-	H	Y	H	H	H	H	Y
AX-183880837	II	15.4	Chr6	20253933	2.61e-29	chr6LG2	15688914			H	H	H	Y	G	Y	H	Y	H	H	H	H	G	H	H	G	H	H	Y	H	H	G	G	H	G	H	H	H	H	H	H	H	Y	H	Y	H	H	H	H	Y
AX-183579184	II	15.52	Chr6	20328826	1.22e-27	chr6LG2	15613418			H	H	H	Y	G	Y	H	Y	H	H	H	H	G	H	H	G	H	H	-	H	H	G	G	H	G	H	H	H	H	H	H	H	H	H	Y	H	H	H	H	Y
AX-183886278	II	15.52	Chr6	20336850	1.22e-27	chr6LG2	15605430			H	H	H	Y	G	Y	H	Y	H	H	H	H	G	H	H	G	H	H	Y	H	H	G	G	Y	G	Y	-	H	H	H	-	H	Y	H	Y	H	H	H	H	Y
AX-183891438	II	15.64	Chr6	20493566	2.61e-29	chr6LG2	15445619			H	Y	H	-	G	Y	H	Y	H	-	H	H	G	H	-	G	H	H	Y	H	H	G	G	H	G	H	G	H	H	-	G	H	H	H	Y	H	H	H	H	Y
AX-183870819	II	15.64	Chr6	20494324	2.61e-29	chr6LG2	15444861			H	H	H	Y	G	Y	H	Y	H	H	H	H	G	H	H	G	H	H	Y	H	H	G	G	H	G	H	H	H	H	H	H	H	Y	H	Y	H	H	H	H	Y
AX-183618869	II	15.64	Chr6	20498245	1.22e-27	chr6LG2	15440940			H	H	H	Y	G	Y	H	Y	H	H	H	H	G	H	H	G	H	H	Y	H	H	G	G	H	G	H	H	H	H	H	H	H	Y	H	Y	H	H	H	H	Y
AX-183618882	II	15.77	Chr6	20596508	2.61e-29	chr6LG2	15351790			H	H	H	Y	G	Y	H	Y	H	H	H	H	G	H	H	G	H	H	Y	H	H	G	G	H	G	H	H	H	H	H	H	H	Y	H	Y	H	H	H	H	Y
AX-183636913	II	15.77	Chr6	20768534	2.61e-29	scaffold04497	15673			H	H	H	Y	G	Y	H	Y	H	H	H	H	G	H	H	G	Y	H	Y	H	H	G	G	H	G	H	H	H	H	H	H	H	Y	H	Y	H	H	H	H	Y
AX-183636912	II	15.77	Chr6	20774331	1.22e-27	scaffold04497	9876			H	-	H	Y	-	Y	H	-	H	H	H	H	G	H	H	G	H	H	Y	H	H	G	G	H	G	H	-	H	H	H	G	H	Y	H	Y	H	H	H	H	Y
AX-183870881	II	16.02	Chr6	20775439	2.61e-29	scaffold04497	8768			H	H	H	Y	G	Y	H	Y	H	H	H	H	G	H	H	G	H	H	Y	H	H	G	G	H	G	H	H	H	H	H	H	H	Y	H	Y	H	H	H	H	Y
AX-183891174	II	16.02	Chr6	20778840	1.22e-27	scaffold04497	5367			H	H	H	Y	G	Y	H	Y	H	H	H	H	G	H	H	G	H	H	Y	H	H	G	G	H	G	H	H	H	H	H	H	H	Y	H	-	H	H	H	H	Y
AX-183635743	II	16.02	Chr6	20824627	1.22e-27	scaffold03108	20117			H	H	H	Y	G	Y	H	Y	H	H	H	H	G	H	H	G	H	H	Y	H	H	G	G	H	G	H	H	H	H	H	H	H	Y	H	Y	H	H	H	H	Y
AX-183635747	II	16.02	Chr6	20832356	4.37e-27	scaffold03108	31646			H	H	H	Y	G	Y	H	Y	H	H	H	H	G	H	H	G	H	H	Y	H	H	G	G	H	G	H	H	H	H	H	H	H	Y	H	Y	H	H	H	H	Y
AX-183883289	II	16.02	Chr6	20833329	2.63e-24	scaffold03108	32616			H	H	H	Y	G	Y	H	Y	H	H	H	H	G	H	H	G	H	H	Y	H	H	G	G	H	G	H	H	H	H	H	H	H	H	H	Y	H	H	H	H	Y
AX-183869636	II	16.02	Chr6	20995972	1.22e-27	chr6LG2	16054074			H	H	H	Y	G	Y	H	Y	H	H	H	H	G	H	H	G	H	H	Y	H	H	G	G	H	G	H	H	H	H	H	H	H	Y	H	Y	H	H	H	H	Y
AX-183619421	II	16.02	Chr6	21186222	2.61e-29	chr6LG2	16148653			H	H	H	Y	G	Y	H	Y	H	H	H	H	G	H	H	G	H	H	Y	H	H	G	G	H	G	H	H	H	H	H	H	H	Y	H	Y	H	H	H	H	Y
AX-183568330	II	16.02	Chr6	21207596	1.22e-27	chr6LG2	16157398			H	H	H	Y	G	Y	H	Y	H	H	H	H	G	H	H	G	H	H	Y	H	H	G	G	H	G	H	H	H	H	H	H	H	Y	H	Y	H	H	H	H	Y
AX-183880328	II	16.02	Chr6	21208234	1.22e-27	chr6LG2	16158049			H	H	H	Y	G	Y	H	Y	H	H	H	H	G	H	H	G	H	H	Y	H	H	G	G	H	G	H	H	H	H	H	H	H	Y	H	Y	H	H	H	H	Y
AX-183579235	II	16.02	Chr6	21209676	2.03e-25	chr6LG2	16159523			H	H	H	Y	G	Y	H	Y	H	H	H	H	G	H	H	G	H	H	Y	H	H	G	G	H	G	H	H	H	H	H	H	H	Y	H	Y	H	H	H	H	Y
AX-183882028	II	16.02	Chr6	21209791	9.46e-24	chr6LG2	16159629			H	H	H	Y	G	Y	H	Y	H	H	H	H	G	H	H	G	H	H	Y	H	H	G	G	H	G	H	H	H	H	H	H	H	-	H	Y	H	H	H	H	Y
AX-183878750	II	16.14	Chr6	21213945	2.61e-29	chr6LG2	16163542			H	H	H	Y	G	Y	H	Y	H	H	H	H	G	H	H	G	H	H	Y	H	H	G	G	H	G	H	H	H	H	H	H	H	Y	H	Y	H	H	H	H	Y
AX-183875828	II	16.26	Chr6	21214596	1.22e-27	chr6LG2	16164193			H	H	H	Y	G	Y	H	H	H	H	H	H	G	H	H	G	H	H	-	H	H	G	G	H	G	H	H	H	H	H	-	H	Y	H	Y	H	H	H	H	Y
AX-183579236	II	16.26	Chr6	21214718	2.61e-29	chr6LG2	16164315			H	H	H	-	G	Y	H	Y	H	H	H	H	H	H	H	G	H	H	Y	H	H	G	G	H	G	H	H	H	H	H	H	H	Y	H	Y	H	H	H	H	Y
AX-183579238	II	16.26	Chr6	21223252	1.22e-27	chr6LG2	16172850			H	H	H	Y	G	Y	H	H	H	H	H	H	G	H	H	G	H	H	Y	H	H	G	G	H	G	H	H	H	H	H	H	H	-	H	Y	H	H	H	H	Y
AX-183887844	II	16.39	Chr6	21377922	1.22e-27	chr6LG2	16378371			H	H	H	Y	G	Y	H	Y	H	H	H	H	G	H	H	G	H	H	Y	H	H	G	G	H	G	H	H	H	H	H	H	H	H	H	Y	H	H	H	H	Y
AX-183882578	II	16.39	Chr6	21379167	2.61e-29	chr6LG2	16379616			H	H	H	Y	G	Y	H	Y	H	H	H	H	G	H	H	G	H	H	Y	H	H	G	G	H	G	H	H	H	H	H	H	H	-	H	Y	H	H	H	H	Y
AX-183619454	II	16.51	Chr6	21427006	2.61e-29	chr6LG2	16420336			H	H	H	Y	G	Y	H	Y	H	H	H	H	G	H	H	G	H	H	Y	H	H	G	G	H	G	H	H	H	H	H	H	H	Y	H	Y	H	H	H	H	Y
AX-183568333	II	16.64	Chr6	21590510	2.61e-29	chr6LG2	16611261			H	H	H	Y	G	Y	H	Y	H	H	H	H	G	H	H	G	H	H	Y	H	H	G	G	H	G	H	H	H	H	H	H	H	Y	H	Y	H	H	H	Y	Y
AX-183619467	II	16.64	Chr6	21620132	2.61e-29	chr6LG2	16641669			H	H	H	Y	G	Y	H	Y	H	H	H	H	G	H	H	G	H	H	Y	H	H	G	G	H	G	H	H	H	H	H	H	H	Y	H	Y	H	H	H	Y	Y
AX-183619468	II	16.64	Chr6	21621793	1.22e-27	chr6LG2	16643330			H	H	H	Y	G	Y	H	Y	H	H	H	H	G	H	H	G	H	H	Y	H	H	G	G	H	G	H	H	H	H	H	H	H	Y	H	Y	H	H	H	Y	Y
AX-183619469	II	16.64	Chr6	21623927	2.61e-29	chr6LG2	16645464			H	H	H	Y	G	Y	H	Y	H	H	H	H	G	H	H	G	H	H	Y	H	H	G	G	H	G	H	H	H	H	H	H	H	Y	H	Y	H	H	H	Y	Y
AX-183574375	II	16.64	Chr6	21630832	2.61e-29	chr6LG2	16652369			H	H	H	Y	G	Y	H	Y	H	H	H	H	G	H	H	G	H	H	Y	H	H	G	G	H	G	H	H	H	H	H	H	H	Y	H	Y	H	H	H	Y	Y
AX-183579240	II	17.01	Chr6	21692960	1.22e-27	chr6LG2	16715343			H	H	H	Y	G	Y	H	Y	H	H	H	H	G	H	H	G	H	H	Y	H	H	G	G	H	G	H	H	H	H	H	H	H	Y	H	Y	H	H	H	Y	Y
AX-183878753	II	17.01	Chr6	21693159	1.22e-27	chr6LG2	16715542			H	H	H	Y	G	Y	H	Y	H	H	H	H	G	H	H	G	H	H	Y	H	H	G	G	H	G	H	H	H	H	H	H	H	Y	H	Y	H	H	H	Y	Y
AX-183619487	II	17.01	Chr6	21696138	2.61e-29	chr6LG2	16718521			H	H	H	Y	G	Y	H	-	H	H	H	-	G	H	H	G	H	H	Y	H	H	G	G	H	G	H	H	H	H	H	-	-	-	H	Y	H	H	H	Y	Y
AX-183890130	II	17.01	Chr6	21704688	1.22e-27	chr6LG2	16727231			H	H	H	Y	G	Y	H	Y	H	H	H	H	G	-	H	G	H	H	Y	H	H	G	G	H	G	H	H	H	H	H	H	H	Y	H	Y	H	H	H	Y	Y
AX-183882030	II	17.01	Chr6	21706262	1.22e-27	chr6LG2	16728805			H	-	H	Y	-	Y	H	H	H	H	H	H	-	H	H	G	Y	H	Y	H	H	G	G	H	G	H	H	H	H	H	H	H	Y	H	Y	H	H	H	Y	Y
AX-183619490	II	17.01	Chr6	21711201	1.22e-27	chr6LG2	16733744			H	H	H	Y	G	Y	H	Y	H	H	H	H	G	H	H	G	H	H	Y	H	H	G	G	H	G	H	H	H	H	H	H	H	Y	H	Y	H	H	H	Y	Y
AX-183870423	II	17.01	Chr6	21712438	2.61e-29	chr6LG2	16734981			H	H	H	Y	G	Y	H	H	H	H	H	H	G	H	H	G	H	H	Y	H	H	G	G	H	G	H	H	H	H	H	H	H	Y	H	Y	H	H	H	Y	Y
AX-183885238	II	17.01	Chr6	21731155	2.61e-29	chr6LG2	16753699			H	H	H	Y	G	Y	H	Y	H	H	H	H	G	H	H	G	H	H	Y	H	H	G	G	H	G	H	H	H	H	H	H	H	Y	H	Y	H	H	H	Y	Y
AX-183619493	II	17.13	Chr6	21934296	3.38e-28	chr6LG2	17509267			H	H	H	H	G	Y	H	Y	H	H	H	H	G	H	H	G	H	H	Y	H	H	G	G	-	G	-	H	H	H	H	H	H	Y	H	Y	-	H	H	Y	Y
AX-183869025	II	17.13	Chr6	21936922	5.65e-26	chr6LG2	17506644			H	H	H	Y	G	Y	H	Y	H	H	H	H	H	-	H	G	H	H	Y	H	H	G	G	H	G	H	H	H	H	-	H	H	Y	H	Y	H	H	-	Y	Y
AX-183876783	II	17.13	Chr6	22062237	2.61e-29	chr6LG2	17420022			H	H	H	Y	G	Y	H	Y	H	H	H	H	G	H	H	G	H	H	Y	H	H	G	G	H	G	H	H	H	H	H	H	H	Y	H	Y	H	H	H	Y	Y
AX-183870824	II	17.13	Chr6	22287879	2.61e-29	chr6LG2	17203554			H	H	H	Y	G	Y	H	Y	H	H	H	H	G	H	H	G	H	H	Y	H	H	G	G	H	G	H	H	H	H	H	H	H	Y	H	Y	H	H	H	Y	Y
AX-183619527	II	17.13	Chr6	22397329	2.61e-29	chr6LG2	17122998			H	H	H	Y	G	Y	H	Y	H	H	H	H	G	H	H	G	H	H	Y	H	H	G	G	H	G	H	H	H	H	H	H	H	Y	H	Y	H	H	H	Y	Y
AX-183888331	II	17.13	Chr6	22399785	1.22e-27	chr6LG2	17120542			H	H	H	Y	G	Y	H	Y	H	H	-	H	G	H	-	G	H	G	H	H	-	G	G	-	G	H	G	H	H	H	H	H	Y	H	Y	H	H	H	Y	Y
AX-183883128	II	17.13	Chr6	22403303	2.61e-29	chr6LG2	17117024			H	H	-	Y	G	Y	H	Y	H	H	H	H	G	H	H	G	H	H	Y	H	H	G	G	H	G	H	H	H	H	H	H	H	Y	H	Y	H	H	H	Y	Y
AX-183619537	II	17.13	Chr6	22452104	2.61e-29	chr6LG2	17062653			H	H	H	Y	G	Y	H	Y	H	H	H	H	G	H	H	G	H	H	Y	H	H	G	G	H	G	H	H	H	H	H	H	H	Y	H	Y	H	H	H	Y	Y
AX-183568336	II	17.13	Chr6	22473860	2.61e-29	chr6LG2	17040716			H	H	H	Y	G	Y	H	Y	H	H	H	H	G	H	H	G	H	H	Y	H	H	G	G	H	G	H	H	H	H	H	H	H	Y	H	Y	H	H	H	Y	Y
AX-183579243	II	17.13	Chr6	22474552	1.22e-27	chr6LG2	17040024			H	H	H	Y	H	Y	H	Y	H	-	H	H	G	H	H	-	H	H	-	H	H	G	G	H	G	H	H	-	H	H	H	H	-	H	Y	H	H	H	Y	Y
AX-183568338	II	17.13	Chr6	22602455	1.22e-27	chr6LG2	16902781			H	H	H	Y	G	Y	H	Y	H	H	H	H	G	H	H	G	H	H	Y	H	H	G	G	H	G	H	H	H	H	H	H	H	-	H	Y	H	H	H	Y	Y
AX-183568343	II	18.13	Chr6	23015945	2.61e-29	chr6LG2	17641705			H	H	H	Y	G	Y	H	Y	H	H	H	H	G	H	H	G	H	H	Y	H	H	G	G	H	G	H	H	H	H	H	H	H	Y	H	Y	H	H	H	Y	Y
AX-183892626	II	18.13	Chr6	23055158	2.61e-29	chr6LG2	17611038			H	H	H	Y	G	Y	H	Y	H	H	H	H	G	H	H	G	H	H	Y	H	H	G	G	H	G	H	H	H	H	H	H	H	Y	H	Y	H	H	H	Y	Y
AX-183640320	II	18.13	Chr6	23061824	2.61e-29	chr6LG2	17604372			H	H	H	Y	G	Y	H	Y	H	H	H	H	G	H	H	G	H	H	Y	H	H	G	G	H	G	H	H	H	H	H	H	-	Y	H	-	H	H	H	Y	Y
AX-183619574	II	18.13	Chr6	23090779	1.22e-27	chr6LG2	17586435			H	H	H	Y	G	Y	H	-	H	H	H	H	G	H	H	G	H	H	Y	H	H	G	G	H	G	H	H	H	H	H	H	H	Y	H	Y	H	H	H	Y	Y
AX-183619575	II	18.13	Chr6	23098777	2.61e-29	chr6LG2	17577847			H	H	H	Y	G	Y	H	Y	H	H	H	H	G	H	H	G	H	H	Y	H	H	G	G	H	G	H	H	H	H	H	H	H	Y	H	Y	H	H	H	Y	Y
AX-183860960	II	18.26	Chr6	23202215	2.61e-29	chr6LG2	18280850			H	H	H	Y	G	Y	H	Y	H	H	H	H	G	H	H	G	H	H	-	-	H	G	G	H	G	H	H	H	H	Y	-	H	H	H	Y	H	H	H	Y	Y
AX-183568216	II	18.26	Chr6	23327876	2.61e-29	chr6LG2	18365076			H	H	H	Y	G	Y	H	Y	H	H	H	H	G	H	H	G	H	H	Y	H	H	G	G	H	G	H	H	H	H	H	H	H	H	H	Y	-	H	H	Y	Y
AX-183618163	II	18.38	Chr6	23875837	2.61e-29	chr6LG2	18949887			H	H	H	Y	G	Y	H	-	H	H	H	H	G	H	H	G	H	H	Y	H	H	G	G	-	G	H	H	H	H	H	H	H	Y	H	Y	H	H	H	Y	Y
AX-183579138	II	18.38	Chr6	23897373	1.22e-27	chr6LG2	18970507			H	H	H	H	G	Y	H	Y	H	H	H	H	G	H	H	G	H	H	Y	H	H	G	G	H	G	H	H	H	H	H	H	H	H	H	Y	H	H	H	Y	Y
AX-183618155	II	18.38	Chr6	23898242	2.61e-29	chr6LG2	18971376			H	H	H	Y	G	Y	H	Y	H	H	H	H	G	H	H	G	H	H	Y	H	H	G	G	H	G	H	H	H	H	H	H	H	H	H	Y	H	H	H	Y	Y
AX-183618150	II	18.38	Chr6	23933212	5.65e-26	chr6LG2	19005580			H	H	H	Y	G	Y	H	Y	H	H	H	H	G	H	H	G	H	H	Y	H	H	G	G	H	G	H	H	H	H	H	H	H	Y	H	Y	H	H	H	Y	Y
AX-183869934	II	18.5	Chr6	24222773	2.61e-29	chr6LG2	18031457			H	H	H	Y	G	Y	H	-	H	H	H	H	G	H	H	G	H	H	Y	H	H	G	G	H	G	H	H	H	H	H	H	H	Y	H	Y	H	H	H	Y	Y
AX-183637310	II	18.5	Chr6	24263791	1.22e-27	scaffold11166	2810			H	H	H	Y	G	Y	H	Y	H	H	H	H	G	H	H	G	H	H	Y	H	H	G	G	H	G	H	H	H	H	H	H	H	Y	H	Y	H	H	H	Y	Y
AX-183869799	II	18.88	Chr6	24349367	5.65e-26	scaffold01897	117204			H	H	H	Y	G	Y	H	Y	H	H	H	H	G	H	H	G	H	H	Y	H	H	G	G	H	G	H	H	H	H	H	H	H	-	H	Y	H	H	H	Y	Y
AX-183889676	II	18.88	Chr6	24642071	5.65e-26	chr6LG2	20094706			H	H	H	Y	G	Y	H	Y	H	H	H	H	G	H	H	G	H	H	Y	H	H	G	G	H	G	H	H	H	H	H	H	H	Y	H	Y	H	H	H	Y	Y
AX-183579249	II	18.88	Chr6	24642237	2.61e-29	chr6LG2	20094540			H	H	H	Y	G	Y	H	Y	H	H	H	H	G	H	H	G	-	H	Y	H	H	G	G	H	G	H	H	H	H	H	H	H	Y	H	Y	H	H	H	Y	Y
AX-183884717	II	18.88	Chr6	24671118	5.65e-26	chr6LG2	20070276			H	H	H	Y	G	Y	H	Y	H	H	H	H	G	H	H	G	H	H	Y	H	H	G	G	H	G	H	H	H	H	H	H	H	-	H	Y	H	H	H	Y	Y
AX-183894094	II	18.88	Chr6	24671182	1.22e-27	chr6LG2	20070212			H	H	H	Y	G	Y	H	Y	H	H	H	H	G	H	H	G	H	H	Y	H	H	G	G	H	G	H	H	H	H	H	H	H	Y	H	Y	H	H	H	Y	Y
AX-183568348	II	18.88	Chr6	24673723	1.22e-27	chr6LG2	20067722			H	H	H	Y	G	Y	H	Y	H	H	H	H	G	H	H	G	H	H	Y	H	H	G	-	H	G	H	H	H	H	-	H	H	Y	H	Y	H	H	H	Y	Y
AX-183640939	II	18.88	Chr6	24776678	1.22e-27	chr6LG2	19106704			H	H	H	Y	G	Y	H	Y	H	H	H	H	G	H	H	G	H	H	Y	H	H	G	G	H	G	H	H	H	H	H	H	H	Y	H	Y	H	H	H	Y	Y
AX-183640938	II	18.88	Chr6	24777651	1.22e-27	chr6LG2	19105690			H	H	H	Y	G	Y	H	Y	H	H	H	H	G	H	H	G	H	H	Y	H	H	G	G	H	G	H	H	H	H	H	H	H	H	H	Y	H	H	H	Y	Y
AX-183640937	II	18.88	Chr6	24779780	5.65e-26	chr6LG2	19103569			H	H	H	Y	G	Y	H	Y	H	H	H	H	G	H	H	G	H	H	Y	H	H	G	G	H	G	H	H	H	H	H	H	H	-	H	Y	H	H	H	Y	Y
AX-183890672	II	18.88	Chr6	24779802	5.65e-26	chr6LG2	19103547			H	H	H	Y	G	Y	H	Y	H	H	H	H	G	H	H	G	H	H	Y	H	H	G	G	H	G	H	H	H	H	H	H	H	Y	H	Y	H	H	H	Y	Y
AX-183871064	II	18.88	Chr6	24780994	5.65e-26	chr6LG2	19102406			H	H	H	Y	G	Y	H	H	H	H	H	H	G	H	H	G	H	H	Y	H	H	G	G	H	G	H	H	H	H	H	H	H	Y	H	Y	H	H	H	Y	Y
AX-183626521	II	18.88	Chr6	24798621	1.22e-27	chr6LG2	19091770			H	H	H	Y	G	Y	H	Y	H	H	H	H	G	H	H	G	H	H	Y	H	H	G	G	H	G	H	H	H	H	H	H	H	Y	H	Y	H	H	H	Y	Y
AX-183619603	II	19	Chr6	25077482	2.61e-29	chr6LG2	19232475			H	H	H	Y	G	Y	H	Y	H	H	H	H	G	H	H	G	H	H	Y	H	H	G	G	H	G	H	H	H	H	H	H	H	Y	H	Y	H	H	H	Y	Y
AX-183885797	II	19.25	Chr6	25213762	2.61e-29	chr6LG2	19384151			H	H	H	Y	G	Y	H	Y	H	H	H	H	-	H	H	G	H	H	Y	H	H	G	G	H	-	H	H	H	H	H	H	H	Y	H	Y	H	H	H	Y	Y
AX-183619629	II	19.25	Chr6	25218703	2.63e-24	chr6LG2	19388926			H	H	H	Y	G	Y	H	Y	H	H	H	H	G	H	-	G	H	H	Y	H	H	G	G	H	G	H	H	-	H	-	H	-	Y	H	Y	H	H	H	Y	Y
AX-183889222	II	19.5	Chr6	25084395	1.22e-27	chr6LG2	19239375			H	-	H	Y	G	Y	H	H	H	H	H	H	G	H	H	G	-	H	Y	H	H	G	G	H	G	H	H	H	H	H	H	H	Y	H	Y	H	H	H	Y	Y
AX-183568350	II	19.5	Chr6	25114296	1.22e-27	chr6LG2	19278891			H	H	H	Y	G	Y	H	Y	H	H	H	H	G	H	H	G	H	H	Y	H	H	G	G	H	G	H	H	H	H	H	H	H	Y	H	Y	H	H	H	Y	Y
AX-183619615	II	19.5	Chr6	25119085	1.22e-27	chr6LG2	19283685			H	H	H	Y	G	Y	H	-	H	H	H	H	-	H	H	G	H	H	Y	H	H	G	G	H	G	H	H	H	H	H	H	H	-	H	Y	H	H	H	Y	Y
AX-183568351	II	19.87	Chr6	25231080	1.22e-27	chr6LG2	19401426			H	H	H	Y	G	Y	H	Y	H	H	H	H	H	H	H	G	H	H	Y	H	H	G	G	H	G	H	H	H	H	H	H	H	Y	H	Y	H	H	H	Y	Y
AX-183619637	II	20.37	Chr6	25476326	2.61e-29	chr6LG2	19668077			H	H	H	Y	G	Y	H	Y	H	H	H	H	G	H	H	G	H	H	Y	H	H	G	G	-	G	H	H	H	H	H	H	H	H	H	Y	H	H	H	Y	Y
AX-183618120	II	20.49	Chr6	25646431	2.61e-29	chr6LG2	20468529			H	H	H	Y	G	Y	H	Y	H	H	H	H	G	H	H	G	H	H	Y	H	H	G	G	H	G	H	H	H	H	H	H	H	H	H	Y	H	H	H	Y	Y
AX-183568213	II	20.61	Chr6	25733290	2.61e-29	chr6LG2	20559405			H	H	H	Y	G	Y	H	Y	H	H	H	H	G	H	H	G	H	H	Y	H	H	G	G	H	G	H	H	H	H	H	H	H	H	H	Y	H	H	H	Y	Y
AX-183617585	II	20.99	Chr6	26070862	5.65e-26	chr6LG2	20242432			H	H	H	Y	G	Y	H	Y	H	H	H	H	G	H	H	G	H	H	Y	H	H	G	G	H	G	H	H	H	H	H	H	H	Y	H	Y	H	H	H	Y	Y
AX-183579106	II	20.99	Chr6	26073713	1.22e-27	chr6LG2	20245287			H	H	H	Y	G	Y	H	Y	H	H	-	H	G	H	H	G	Y	H	Y	H	H	G	G	H	G	H	-	H	H	H	H	H	Y	H	H	H	H	H	Y	-
AX-183579104	II	20.99	Chr6	26100308	2.61e-29	chr6LG2	20285675			H	H	H	Y	G	Y	H	Y	H	H	H	H	G	H	H	G	H	H	Y	H	H	G	G	H	G	H	H	H	H	H	H	H	-	H	Y	H	H	H	Y	Y
AX-183617577	II	21.23	Chr6	26124268	2.61e-29	chr6LG2	20318622			H	H	H	Y	G	Y	H	Y	H	H	H	H	-	H	H	G	H	H	Y	H	H	G	G	H	G	H	H	H	H	H	H	H	Y	H	Y	H	H	H	Y	Y
AX-183617573	II	21.23	Chr6	26151199	1.22e-27	chr6LG2	20347347			H	H	H	Y	G	Y	H	Y	H	H	H	H	G	H	H	G	H	H	Y	H	H	G	G	H	G	H	H	H	H	H	H	H	Y	H	Y	H	H	H	Y	Y
AX-183884157	II	21.23	Chr6	26154152	2.61e-29	chr6LG2	20354244			H	H	H	Y	G	Y	H	Y	H	H	H	H	G	H	H	G	H	H	Y	H	H	G	G	H	G	H	H	H	H	H	H	H	Y	H	Y	H	H	H	Y	Y
AX-183568178	II	21.23	Chr6	26163460	1.22e-27	chr6LG2	20362961			H	H	H	Y	G	Y	H	Y	H	H	H	H	G	H	H	G	H	H	Y	H	H	G	G	H	G	H	H	H	H	H	H	H	-	H	Y	H	H	H	Y	Y
AX-183617567	II	21.23	Chr6	26164362	1.22e-27	chr6LG2	20363856			H	H	H	Y	G	Y	H	Y	H	H	H	H	G	H	H	G	H	H	Y	H	H	G	G	H	G	H	H	H	H	H	H	H	Y	H	Y	H	H	H	Y	Y
AX-183891428	II	21.48	Chr6	26186238	2.61e-29	chr6LG2	20385794			H	H	H	Y	G	Y	H	Y	H	H	H	H	G	H	H	G	H	H	Y	H	H	G	G	H	G	H	H	H	H	H	H	H	Y	H	Y	H	H	H	Y	Y
AX-183894421	II	21.48	Chr6	26189784	1.22e-27	chr6LG2	20389337			H	H	H	Y	G	Y	H	Y	H	H	H	H	G	H	H	G	H	H	Y	H	H	G	G	H	G	H	H	H	H	H	H	H	-	H	Y	H	H	H	Y	Y
AX-183617563	II	21.48	Chr6	26191077	2.61e-29	chr6LG2	20390630			H	H	H	Y	G	Y	H	Y	H	H	H	H	G	H	H	G	H	H	Y	H	H	G	G	H	G	H	H	H	H	H	H	H	-	H	Y	H	H	H	Y	Y
AX-183617561	II	21.48	Chr6	26196862	2.61e-29	chr6LG2	20396415			H	-	H	Y	G	Y	H	-	H	H	H	H	G	H	H	G	H	H	Y	H	H	G	G	H	G	H	H	H	H	H	H	H	Y	H	Y	H	H	H	-	-
AX-183568177	II	21.48	Chr6	26201328	1.57e-26	chr6LG2	20400878			H	H	H	Y	G	Y	H	Y	H	H	H	H	G	H	H	G	H	H	Y	H	H	G	G	H	G	H	H	H	H	H	H	H	Y	H	Y	H	H	H	Y	Y
AX-183626489	II	21.73	Chr6	26298082	2.61e-29	chr6LG2	21235788			H	H	H	Y	G	Y	H	Y	H	H	H	H	H	H	H	G	H	H	Y	H	H	G	G	H	G	H	H	H	H	H	H	H	Y	H	Y	H	H	H	Y	Y
AX-183579875	II	21.73	Chr6	26298394	2.61e-29	chr6LG2	21235476			H	H	H	Y	G	Y	H	Y	H	H	H	H	G	H	H	G	H	H	Y	H	H	G	G	H	G	H	H	H	H	H	H	H	Y	H	Y	H	H	H	Y	Y
AX-183888395	II	21.73	Chr6	26313879	1.22e-27	chr6LG2	21219839			H	H	H	Y	G	Y	H	Y	H	H	H	H	G	H	H	G	H	H	Y	H	H	G	G	H	G	H	-	H	H	H	H	H	H	H	Y	H	H	H	Y	Y
AX-183626494	II	21.85	Chr6	26411011	2.63e-24	chr6LG2	21119636			H	H	H	Y	G	Y	H	Y	H	H	H	H	-	H	H	G	H	H	Y	H	H	G	G	H	G	H	H	H	H	H	H	H	Y	H	Y	H	H	H	Y	Y
AX-183626495	II	21.85	Chr6	26412744	2.61e-29	chr6LG2	21118006			H	H	H	Y	G	Y	H	Y	H	H	H	H	G	H	H	G	H	H	Y	H	H	G	G	H	G	H	H	H	H	H	H	H	Y	H	Y	H	H	H	Y	Y
AX-183869188	II	21.98	Chr6	26595834	2.63e-24	chr6LG2	21031080			H	H	H	Y	G	Y	H	H	H	H	H	H	G	H	H	G	H	H	H	H	H	G	G	H	G	H	H	H	H	H	H	H	H	H	H	H	H	H	Y	Y
AX-183626503	II	21.98	Chr6	26599227	5.65e-26	chr6LG2	21027765			H	H	H	Y	G	Y	H	H	H	H	H	H	G	H	H	G	H	H	Y	H	H	H	G	H	G	H	H	H	H	H	-	H	-	H	Y	H	H	H	Y	Y
AX-183875888	II	21.98	Chr6	26601055	2.61e-29	chr6LG2	21025937			H	H	H	Y	G	Y	H	Y	H	H	H	H	G	H	H	G	H	H	Y	H	H	G	G	H	G	H	H	H	H	H	H	H	Y	H	Y	H	H	H	Y	Y
AX-183626507	II	21.98	Chr6	26602355	1.22e-27	chr6LG2	21024637			H	H	H	Y	G	Y	H	Y	H	H	H	H	-	H	H	G	H	H	Y	H	H	G	G	H	G	H	H	H	H	H	H	H	Y	H	Y	H	H	H	Y	Y
AX-183888396	II	21.98	Chr6	26604473	1.22e-27	chr6LG2	21022519			H	H	H	Y	G	Y	H	Y	H	H	H	H	G	H	H	G	H	H	H	H	H	G	G	H	G	H	H	H	H	H	H	H	Y	H	Y	H	H	H	Y	Y
AX-183626512	II	21.98	Chr6	26605957	1.22e-27	chr6LG2	21021035			H	H	H	Y	G	Y	H	Y	H	H	H	H	G	H	H	G	H	H	Y	H	-	G	G	Y	G	H	H	H	H	H	H	H	Y	H	Y	H	H	H	Y	Y
AX-183874181	II	22.1	Chr6	26728647	2.61e-29	chr6LG2	20911089			H	H	H	Y	G	Y	H	Y	H	H	H	H	G	H	H	G	H	H	Y	H	H	G	G	H	G	H	H	H	H	H	H	H	Y	H	Y	H	H	H	Y	Y
AX-183616925	II	22.35	Chr6	26888182	1.22e-27	chr6LG2	22420532			H	H	H	Y	G	Y	H	-	H	H	H	H	G	H	H	G	H	H	Y	H	H	G	G	H	G	H	-	H	H	H	H	H	Y	H	Y	H	H	H	Y	Y
AX-183616918	II	22.35	Chr6	27058496	1.22e-22	chr6LG2	22284579			H	H	H	Y	G	Y	H	Y	H	H	H	H	G	H	H	G	H	H	Y	H	H	G	G	H	G	H	H	H	H	H	H	H	-	H	Y	H	H	H	Y	Y
AX-183616917	II	22.35	Chr6	27058526	5.65e-26	chr6LG2	22284549			H	H	H	Y	G	Y	H	Y	H	H	H	H	G	H	H	G	H	H	Y	H	H	G	G	H	G	H	H	H	H	H	H	H	Y	H	Y	H	H	H	Y	Y
AX-183881389	II	22.35	Chr6	27059042	2.61e-29	chr6LG2	22284033			H	H	H	Y	G	Y	H	Y	H	H	H	H	G	H	H	G	H	H	Y	H	H	G	G	H	G	H	H	H	H	H	H	H	Y	H	Y	H	H	H	Y	Y
AX-183877725	II	22.35	Chr6	27083736	2.61e-29	chr6LG2	22259347			H	H	H	Y	G	Y	H	Y	H	H	H	H	G	H	H	G	H	H	Y	H	H	G	G	H	G	H	H	H	H	H	H	H	H	H	Y	H	H	H	Y	Y
AX-183640091	II	22.35	Chr6	27163000	2.61e-29	chr6LG2	22164466			H	H	H	Y	G	Y	H	Y	H	H	H	H	G	-	H	G	H	H	Y	H	H	G	G	H	G	H	H	H	H	H	-	H	-	H	Y	H	H	H	Y	Y
AX-183579055	II	22.47	Chr6	27171080	2.61e-29	chr6LG2	22156386			H	H	H	Y	G	Y	H	Y	H	H	H	H	G	H	H	G	H	H	Y	H	H	G	G	H	G	H	H	H	H	H	H	H	Y	H	Y	H	H	H	Y	Y
AX-183616894	II	22.72	Chr6	27192794	1.22e-27	chr6LG2	22134650			H	H	H	Y	G	Y	H	Y	H	H	H	H	G	H	H	G	H	H	Y	H	H	G	G	H	G	H	H	H	H	H	H	H	Y	H	Y	H	H	H	Y	Y
AX-183581816	II	22.72	Chr6	27368911	1.22e-27	chr6LG2	22064385			H	H	H	Y	G	Y	H	Y	H	H	H	H	G	H	H	G	H	H	Y	H	H	G	G	H	G	H	H	H	H	H	H	H	-	H	Y	H	H	H	Y	Y
AX-183568117	II	22.72	Chr6	27369303	2.61e-29	chr6LG2	22063993			H	H	H	Y	G	Y	H	Y	H	H	H	H	G	H	H	G	H	H	Y	H	H	G	G	H	G	H	H	H	H	H	H	H	Y	H	Y	H	H	H	Y	Y
AX-183619646	II	22.72	Chr6	27397914	1.22e-27	chr6LG2	19807351			H	H	H	Y	G	Y	H	Y	H	H	H	H	G	H	H	G	H	H	Y	H	H	G	G	H	G	H	H	H	H	H	H	H	Y	H	Y	H	H	H	Y	Y
AX-183619649	II	22.72	Chr6	27407601	1.22e-27	chr6LG2	19815614			H	H	H	Y	G	Y	H	Y	H	H	H	H	G	H	H	G	H	H	Y	H	H	G	G	H	G	H	H	H	H	H	H	H	Y	H	Y	H	H	H	Y	Y
AX-183616890	II	22.72	Chr6	27484414	5.65e-26	chr6LG2	21841513			H	H	H	Y	G	Y	H	Y	H	H	H	H	G	H	H	G	H	H	Y	H	H	G	G	H	G	H	H	H	H	H	H	H	H	H	Y	H	H	H	Y	Y
AX-183568115	II	22.72	Chr6	27536457	1.22e-27	chr6LG2	21806695			H	H	H	Y	G	Y	H	Y	H	H	H	H	G	H	H	G	H	H	Y	H	H	G	G	H	G	H	H	H	H	H	H	H	Y	H	Y	H	H	H	Y	Y
AX-183568114	II	22.85	Chr6	27596936	1.22e-27	chr6LG2	21762360			H	H	H	Y	G	Y	H	Y	H	H	H	H	G	H	H	G	H	H	Y	H	H	G	G	H	G	H	H	H	H	H	H	H	-	H	Y	H	H	H	Y	Y
AX-183579053	II	22.97	Chr6	27717745	2.61e-29	chr6LG2	21625431			H	H	H	Y	G	Y	H	Y	H	H	H	H	H	H	H	G	H	H	-	H	H	G	G	H	G	H	H	H	H	H	H	H	-	H	Y	H	H	H	Y	Y
AX-183616871	II	22.97	Chr6	27729435	2.61e-29	chr6LG2	21611358			H	H	H	Y	G	Y	H	Y	H	H	H	H	G	H	H	G	H	H	Y	H	H	G	G	H	G	H	H	H	H	H	H	H	Y	H	Y	H	H	H	Y	Y
AX-183568112	II	23.09	Chr6	27729507	2.61e-29	chr6LG2	21611286			H	H	H	Y	G	Y	H	Y	H	H	H	H	G	H	H	G	H	H	Y	H	H	G	G	H	G	H	H	H	H	H	H	H	-	H	Y	H	H	H	Y	Y
AX-183579873	II	23.09	Chr6	28271417	1.22e-27	chr6LG2	22758241			H	H	H	Y	G	Y	H	Y	H	H	H	H	G	H	H	G	H	H	Y	H	H	G	G	H	G	H	H	H	H	H	H	H	-	H	Y	H	H	H	Y	Y
AX-183579868	II	23.09	Chr6	28427247	2.61e-29	scaffold03273	90788			H	H	H	Y	G	Y	H	Y	H	H	H	H	G	H	H	G	H	H	Y	H	H	G	G	H	G	H	H	H	H	H	H	H	Y	H	Y	H	H	H	Y	Y
AX-183619651	II	23.34	Chr6	28523868	5.65e-26	chr6LG2	22790495			H	H	H	Y	G	Y	H	Y	H	H	H	H	G	H	H	G	H	H	Y	H	H	G	G	H	G	H	H	H	H	H	H	H	Y	H	Y	H	H	H	Y	Y
AX-183579255	II	23.47	Chr6	28570086	2.61e-29	chr6LG2	22827937			H	H	H	Y	G	Y	H	Y	H	H	H	H	G	H	H	G	H	H	Y	H	H	G	G	H	G	H	H	H	H	H	H	H	Y	H	Y	H	H	H	Y	Y
AX-183619660	II	23.47	Chr6	28572485	2.61e-29	chr6LG2	22830446			H	H	H	Y	G	Y	H	Y	H	H	H	H	G	H	H	G	H	H	Y	H	H	G	G	H	G	H	H	H	H	H	H	H	Y	H	Y	H	H	H	Y	Y
AX-183619662	II	23.47	Chr6	28596194	1.22e-27	chr6LG2	22852267			H	H	H	Y	G	Y	H	Y	H	H	H	H	G	H	H	G	H	H	Y	H	H	G	G	H	G	H	H	H	H	H	H	H	Y	H	Y	H	H	H	Y	Y
AX-183619665	II	23.47	Chr6	28645920	1.22e-27	chr6LG2	22902164			H	H	H	Y	G	Y	H	Y	H	H	H	H	-	H	H	G	H	H	Y	H	H	G	G	-	G	H	H	H	H	H	H	H	Y	H	Y	H	H	H	Y	Y
AX-183619667	II	23.59	Chr6	28658979	1.22e-27	chr6LG2	22915176			H	H	H	Y	G	Y	H	Y	H	H	H	H	G	H	H	G	H	H	Y	H	H	G	G	H	G	H	H	H	H	H	H	H	Y	H	Y	H	H	H	Y	Y
AX-183619668	II	23.59	Chr6	28659782	1.22e-27	chr6LG2	22915979			H	-	H	Y	G	Y	H	Y	H	H	H	H	G	H	H	G	H	H	Y	H	H	G	G	G	G	H	H	H	H	H	H	H	H	H	Y	H	H	H	Y	Y
AX-183619669	II	23.59	Chr6	28659918	2.61e-29	chr6LG2	22916115			H	H	H	Y	G	Y	H	Y	H	H	H	H	G	H	H	G	H	H	Y	H	H	G	G	H	G	H	H	H	H	H	H	H	Y	H	Y	H	H	H	Y	Y
AX-183619671	II	23.59	Chr6	28698230	2.61e-29	chr6LG2	22954368			H	H	H	Y	G	Y	H	Y	H	H	H	H	G	H	H	G	H	H	Y	H	H	G	G	H	G	H	H	H	H	H	H	H	Y	H	Y	H	H	H	Y	Y
AX-183568357	II	23.71	Chr6	28758485	2.61e-29	chr6LG2	23011037			H	H	H	Y	G	Y	H	Y	H	H	H	H	-	H	H	G	H	H	Y	H	H	G	G	H	G	-	H	H	H	H	H	H	Y	H	Y	H	H	H	Y	Y
AX-183619675	II	23.71	Chr6	28788611	1.57e-26	chr6LG2	23028705			H	H	H	Y	H	Y	H	Y	H	-	H	H	-	H	H	G	H	H	Y	H	H	G	G	-	G	H	H	H	H	H	H	H	Y	H	Y	H	H	H	Y	Y
AX-183884172	II	23.71	Chr6	28800163	1.22e-27	chr6LG2	23048147			H	H	H	Y	G	Y	H	Y	H	H	H	H	G	H	H	G	H	H	Y	H	H	G	G	H	G	H	H	H	H	H	H	H	Y	H	Y	H	H	H	Y	Y
AX-183619705	II	23.71	Chr6	28926969	2.61e-29	chr6LG2	23208795			H	H	H	Y	G	Y	H	Y	H	H	H	H	G	H	H	G	H	H	Y	H	H	G	G	H	G	H	H	H	H	H	H	H	H	H	Y	H	H	H	Y	Y
AX-183579259	II	23.71	Chr6	29025488	1.22e-27	chr6LG2	23171065			H	H	H	Y	G	Y	H	Y	H	H	H	H	G	H	H	G	H	H	Y	H	H	G	G	H	G	H	H	H	H	H	H	H	Y	H	Y	H	H	H	Y	Y
AX-183568364	II	23.71	Chr6	29045924	2.61e-29	chr6LG2	23142931			H	H	H	Y	G	Y	H	Y	H	H	H	H	G	H	H	G	H	H	Y	H	H	G	G	H	G	H	H	H	H	H	H	H	Y	H	Y	H	H	H	Y	Y
AX-183891451	II	23.71	Chr6	29162406	1.22e-27	chr6LG2	23361211			H	H	H	Y	G	Y	H	Y	H	H	H	H	G	H	H	G	H	H	Y	-	H	G	G	H	G	H	H	H	H	H	H	H	Y	H	Y	H	H	H	Y	Y
AX-183579258	II	23.71	Chr6	29173030	2.61e-29	chr6LG2	23351040			H	H	H	Y	G	Y	H	Y	H	H	H	H	G	H	H	G	H	H	Y	H	H	G	G	H	G	H	H	H	H	H	H	H	Y	H	Y	H	H	H	Y	Y
AX-183581871	II	23.84	Chr6	29220210	2.61e-29	chr6LG2	23296913			H	H	H	Y	G	Y	H	Y	H	H	H	H	G	H	H	G	H	H	Y	H	H	G	G	H	G	H	H	H	H	H	H	H	Y	H	Y	H	H	H	Y	Y
AX-183619722	II	23.84	Chr6	29341110	1.22e-27	chr6LG2	23451340			H	H	H	Y	G	Y	H	Y	H	H	H	H	G	H	H	G	H	H	Y	H	H	G	G	H	G	H	H	H	H	H	H	H	Y	H	Y	H	H	H	Y	Y
AX-183568366	II	23.84	Chr6	29343152	2.61e-29	chr6LG2	23453382			H	H	H	Y	G	Y	H	Y	H	H	H	H	G	H	H	G	H	H	Y	H	H	G	G	H	G	H	H	H	H	H	H	H	Y	H	Y	H	H	H	Y	Y
AX-183619725	II	23.84	Chr6	29343663	2.61e-29	chr6LG2	23453891			H	H	H	Y	G	Y	H	Y	H	H	H	H	G	H	H	G	H	H	Y	H	H	G	G	H	G	H	H	H	H	H	H	H	Y	H	Y	H	H	H	Y	Y
AX-183619726	II	23.84	Chr6	29465731	5.65e-26	chr6LG2	23579632			H	H	H	Y	G	Y	H	Y	H	H	H	H	G	H	H	G	H	H	Y	H	H	G	G	H	G	H	H	H	H	H	H	H	Y	H	Y	H	H	H	Y	Y
AX-183579263	II	23.84	Chr6	29467406	5.65e-26	chr6LG2	23581324			H	H	H	Y	G	Y	H	Y	H	H	H	H	G	H	H	G	H	H	Y	H	H	G	G	H	G	H	H	H	H	H	H	H	Y	H	Y	H	H	H	Y	Y
AX-183881419	II	23.84	Chr6	29467608	1.22e-27	chr6LG2	23581524			H	Y	H	Y	G	Y	H	Y	H	H	H	H	G	H	H	G	H	H	Y	H	H	G	G	H	G	H	H	H	H	H	H	H	H	H	Y	H	H	H	Y	Y
AX-183579264	II	23.84	Chr6	29468594	1.22e-27	chr6LG2	23582510			H	H	H	Y	G	Y	H	Y	H	H	H	H	G	H	H	G	H	H	Y	H	H	G	G	H	G	H	H	H	H	H	H	H	-	H	Y	H	H	H	Y	Y
AX-183869639	II	23.84	Chr6	29468984	2.61e-29	chr6LG2	23582894			H	H	H	Y	G	Y	H	Y	H	H	H	H	G	H	H	G	H	H	Y	H	H	G	G	H	G	H	H	H	H	H	H	H	Y	H	Y	H	H	H	Y	Y
AX-183619730	II	23.84	Chr6	29469021	1.22e-27	chr6LG2	23582931			H	H	H	Y	G	Y	H	Y	H	H	H	H	G	H	H	G	H	H	Y	H	H	G	G	H	G	H	H	H	H	H	H	H	Y	H	Y	H	H	H	Y	Y
AX-183619740	II	24.09	Chr6	29561684	2.61e-29	chr6LG2	23630028			H	-	H	Y	G	Y	H	Y	H	H	H	H	G	H	H	H	H	H	Y	H	H	-	G	H	G	H	H	H	H	H	H	H	-	H	Y	H	H	H	Y	Y
AX-183891453	II	24.09	Chr6	29562646	2.61e-29	chr6LG2	23630990			H	H	H	Y	G	Y	H	Y	H	H	H	H	G	H	H	H	H	H	Y	H	H	G	G	-	G	H	H	H	H	H	H	H	-	H	Y	H	H	H	Y	Y
AX-183568368	II	24.09	Chr6	29563510	1.22e-27	chr6LG2	23631855			H	H	H	Y	G	Y	H	Y	H	H	H	H	G	H	H	H	H	H	Y	H	H	G	G	H	G	H	H	H	H	H	H	H	Y	H	Y	H	H	H	Y	Y
AX-183892629	II	24.09	Chr6	29845184	1.22e-27	chr6LG2	23906431			H	H	H	Y	G	Y	H	Y	H	H	H	H	G	H	H	H	H	H	Y	H	H	G	G	H	G	H	H	H	H	H	H	H	-	H	Y	H	H	H	Y	Y
AX-183619749	II	24.46	Chr6	29875244	1.22e-22	chr6LG2	23931261			H	H	H	Y	G	Y	H	Y	H	H	H	H	-	H	H	H	H	H	Y	H	H	G	G	H	G	H	H	H	H	H	H	H	Y	H	Y	H	H	H	Y	Y
AX-183888334	II	24.58	Chr6	29878402	5.65e-26	chr6LG2	23938556			H	H	H	Y	G	Y	H	Y	H	H	H	H	G	H	H	H	H	H	Y	H	H	G	G	H	-	H	H	H	H	H	H	H	H	H	Y	H	H	H	Y	Y
AX-183619750	II	24.58	Chr6	29880722	2.03e-25	chr6LG2	23940879			H	H	H	Y	-	Y	H	Y	H	H	H	H	-	H	H	H	H	H	Y	H	H	-	-	H	H	H	H	H	H	H	-	H	H	H	Y	H	H	H	Y	Y
AX-183619801	II	24.58	Chr6	30219463	2.61e-29	chr6LG2	24242834			H	H	H	Y	G	Y	H	Y	H	H	H	H	G	H	H	H	H	H	Y	H	H	G	G	H	G	H	H	H	H	H	H	H	Y	H	Y	H	H	H	Y	Y
AX-183884719	II	24.83	Chr6	30284582	1.22e-27	chr6LG2	24295069			H	H	H	Y	G	Y	H	Y	H	H	H	H	G	-	H	H	H	H	Y	H	H	G	G	-	G	H	-	H	H	H	H	H	-	H	Y	H	H	H	-	-
AX-183579269	II	24.83	Chr6	30319314	2.61e-29	chr6LG2	24334177			H	H	H	Y	G	Y	H	Y	H	H	H	H	G	H	H	H	H	H	Y	H	H	G	H	H	G	H	H	H	H	H	H	H	Y	H	Y	H	H	H	Y	Y
AX-183568372	II	24.83	Chr6	30399710	1.22e-27	chr6LG2	24378551			H	H	H	Y	G	Y	H	Y	H	H	H	H	G	H	H	H	H	H	Y	H	H	G	G	H	G	H	H	H	H	H	H	H	Y	H	Y	H	H	H	Y	Y
AX-183619809	II	24.83	Chr6	30481416	2.61e-29	chr6LG2	24090442			H	H	H	Y	G	Y	H	Y	H	H	H	H	G	H	H	H	H	H	Y	H	H	G	-	H	G	H	H	H	H	H	H	H	Y	H	Y	H	H	H	Y	Y
AX-183579267	II	24.95	Chr6	30816812	1.22e-27	chr6LG2	24831647			H	H	H	Y	G	Y	H	Y	H	H	H	H	G	H	H	H	H	H	Y	H	H	G	G	H	G	H	H	H	H	H	H	H	Y	H	Y	H	H	H	Y	Y
AX-183571902	II	24.95	Chr6	30928611	3.38e-28	chr6LG2	24926085			H	H	H	Y	G	Y	H	Y	H	H	H	H	G	H	H	H	H	H	Y	H	H	G	G	H	G	H	H	H	H	H	H	H	Y	H	Y	H	H	H	Y	Y
AX-183571901	II	25.08	Chr6	30930307	5.65e-26	chr6LG2	24927779			H	H	H	Y	G	Y	H	Y	H	H	H	H	G	H	H	H	H	H	Y	H	H	G	G	H	G	H	H	H	H	H	H	H	Y	H	Y	H	H	H	Y	Y
AX-183884344	II	25.45	Chr6	31217948	1.22e-27	scaffold02694	128069			H	H	H	Y	G	Y	H	Y	H	H	H	H	G	H	H	H	H	H	Y	H	H	G	G	H	G	H	H	H	H	H	H	H	Y	H	Y	H	H	H	Y	Y
AX-183619913	II	25.7	Chr6	31640619	2.61e-29	chr6LG2	25188815			H	H	H	Y	G	Y	H	Y	H	H	H	H	G	H	H	H	H	H	Y	H	H	G	G	H	G	H	H	H	H	H	H	H	Y	H	Y	H	H	H	Y	Y
AX-183619914	II	25.7	Chr6	31642162	1.22e-27	chr6LG2	25190358			H	H	H	Y	G	Y	H	-	H	H	H	H	G	H	H	H	H	H	Y	H	H	G	G	H	G	H	H	H	H	H	H	H	-	H	Y	H	H	H	Y	Y
AX-183879285	II	25.82	Chr6	31678379	2.61e-29	chr6LG2	25229451			H	H	H	Y	G	Y	H	Y	H	H	H	H	G	H	H	H	H	H	Y	H	H	G	G	H	G	H	H	H	H	H	H	H	-	H	Y	H	H	H	Y	Y
AX-183571908	II	25.82	Chr6	31731592	1.22e-27	chr6LG2	25277887			H	H	H	Y	G	Y	H	Y	H	H	H	H	G	H	H	H	H	H	Y	H	H	G	G	H	G	H	H	H	H	H	H	H	Y	H	Y	H	H	H	Y	Y
AX-183581877	II	25.82	Chr6	31732310	2.61e-29	chr6LG2	25278604			H	H	H	Y	G	Y	H	Y	H	H	H	H	G	H	H	H	H	H	Y	H	H	G	G	H	G	H	H	H	H	H	H	H	Y	H	Y	H	H	H	Y	Y
AX-183887848	II	25.82	Chr6	31738560	1.22e-27	chr6LG2	25282735			-	H	H	Y	G	Y	H	-	H	H	H	H	H	H	-	H	H	H	-	H	Y	G	G	G	G	H	H	H	H	H	H	H	H	H	Y	H	-	H	Y	Y
AX-183579281	II	25.82	Chr6	31863926	1.22e-27	chr6LG2	25442396			H	H	H	Y	G	Y	H	Y	H	H	H	H	G	H	H	H	H	H	Y	H	H	G	H	H	G	H	H	H	H	H	H	H	Y	H	Y	H	H	H	Y	Y
AX-183870227	II	25.82	Chr6	31892209	1.22e-27	chr6LG2	25470712			H	H	H	Y	G	Y	H	Y	H	H	H	H	G	H	H	H	H	H	Y	H	H	G	G	H	G	H	H	H	H	H	H	H	Y	H	Y	H	H	H	Y	Y
AX-183579282	II	25.82	Chr6	31895524	2.61e-29	chr6LG2	25474004			H	H	H	Y	G	Y	H	Y	H	H	H	H	G	H	H	H	H	H	Y	H	H	G	G	H	G	H	H	H	H	H	H	H	Y	H	Y	H	H	H	Y	Y
AX-183640344	II	25.82	Chr6	31928466	2.61e-29	chr6LG2	25490978			H	H	H	Y	G	Y	H	Y	H	H	H	H	G	H	H	H	H	H	Y	H	H	G	G	H	G	H	H	H	H	H	H	H	Y	H	Y	H	H	H	Y	Y
AX-183579283	II	25.82	Chr6	31929430	2.61e-29	chr6LG2	25491981			H	H	H	Y	G	Y	H	Y	H	H	H	H	G	H	H	H	H	H	Y	H	H	G	G	H	G	H	H	H	H	H	H	H	Y	H	Y	H	H	H	Y	Y
AX-183619934	II	25.95	Chr6	31994257	2.61e-29	chr6LG2	25546829			H	H	H	Y	G	Y	H	Y	H	H	H	H	G	H	H	H	H	H	Y	H	H	G	G	H	G	H	H	H	H	H	H	H	Y	H	Y	H	H	H	Y	Y
AX-183878756	II	25.95	Chr6	32001910	1.22e-27	chr6LG2	25554482			H	H	H	Y	G	Y	H	Y	H	H	H	H	G	H	H	H	H	H	Y	H	H	G	G	H	G	H	H	H	H	H	H	H	Y	H	Y	H	H	H	Y	Y
AX-183878264	II	25.95	Chr6	32022405	5.65e-26	chr6LG2	25591276			H	H	H	Y	G	Y	H	Y	H	H	H	H	G	H	H	H	H	H	Y	H	H	G	G	H	-	H	H	H	H	H	H	H	Y	H	Y	H	H	H	Y	Y
AX-183640352	II	26.2	Chr6	32283874	2.61e-29	chr6LG2	25916169			H	H	H	Y	G	Y	H	Y	H	H	H	H	G	H	H	H	H	H	Y	H	H	G	G	H	G	H	H	H	H	H	H	H	Y	H	Y	H	H	H	Y	Y
AX-183884175	II	26.2	Chr6	32283948	1.22e-27	chr6LG2	25916243			H	H	H	Y	G	Y	H	Y	H	H	H	H	G	H	H	H	H	H	Y	H	H	G	G	H	G	H	H	H	H	H	H	H	Y	H	Y	H	H	H	Y	Y
AX-183568392	II	26.32	Chr6	32308680	1.22e-27	chr6LG2	25942918			H	H	H	Y	-	Y	H	Y	H	H	H	H	-	H	H	H	H	H	Y	H	H	G	G	H	G	H	H	H	H	H	H	H	H	H	Y	H	H	H	Y	Y
AX-183579285	II	26.32	Chr6	32350767	1.22e-27	chr6LG2	25990646			H	H	H	Y	G	Y	H	Y	H	H	H	H	G	H	H	H	H	H	Y	H	H	G	G	H	G	H	H	H	H	H	H	H	H	H	Y	H	H	H	Y	Y
AX-183867754	II	26.32	Chr6	32351191	2.61e-29	chr6LG2	25991070			H	H	H	Y	G	Y	H	Y	H	H	H	H	-	H	H	H	H	H	Y	H	H	G	G	H	G	H	H	H	H	H	H	H	Y	H	Y	H	H	H	Y	Y
AX-183619971	II	26.44	Chr6	32480203	2.61e-29	chr6LG2	5679588			H	H	H	Y	G	Y	H	Y	H	H	H	H	G	H	H	H	H	H	Y	H	H	G	G	H	G	H	H	H	H	H	H	H	Y	H	Y	H	H	H	Y	Y
AX-183619984	II	26.57	Chr6	32604208	2.61e-29	chr6LG2	5551560			H	-	H	Y	-	Y	H	Y	H	H	H	H	G	H	H	-	H	H	Y	H	H	G	H	H	G	H	H	H	H	H	H	H	Y	H	Y	H	H	H	Y	Y
AX-183571911	II	26.57	Chr6	32622770	1.22e-27	chr6LG2	5532815			H	H	H	Y	G	Y	H	Y	H	H	H	H	G	H	H	H	H	H	Y	H	H	G	G	H	G	H	H	H	H	H	H	H	Y	H	Y	H	H	H	Y	Y
AX-183886289	II	26.57	Chr6	32623428	2.61e-29	chr6LG2	5532157			H	H	H	Y	G	Y	H	Y	H	H	H	H	G	H	H	H	H	H	Y	H	H	G	G	H	G	H	H	H	H	H	H	H	Y	H	Y	H	H	H	Y	Y
AX-183619992	II	26.57	Chr6	32628360	2.61e-29	chr6LG2	5527222			H	H	H	Y	G	Y	H	-	H	H	H	H	G	H	H	H	H	H	Y	H	H	G	G	H	G	H	H	H	H	H	H	H	Y	H	Y	H	H	H	Y	Y
AX-183874950	II	26.57	Chr6	32629596	2.61e-29	chr6LG2	5525986			H	H	H	Y	G	Y	H	Y	H	H	H	H	G	H	H	H	H	H	Y	H	H	G	H	H	G	H	H	H	H	H	H	H	H	H	Y	H	H	H	Y	Y
AX-183862388	II	26.57	Chr6	32641145	1.22e-27	chr6LG2	5514437			H	H	H	Y	G	Y	H	Y	H	H	H	H	G	H	H	H	H	H	Y	H	H	G	G	H	G	H	H	H	H	H	H	H	-	H	Y	H	H	H	Y	Y
AX-183574972	II	26.57	Chr6	32645851	1.22e-27	chr6LG2	5509731			H	H	H	Y	G	Y	H	Y	H	H	H	H	G	H	H	H	H	H	Y	H	H	G	G	H	G	H	H	H	H	H	H	H	Y	H	Y	H	H	H	Y	Y
AX-183619838	II	26.57	Chr6	32738210	1.22e-27	chr6LG2	26256039			H	H	H	Y	G	Y	H	Y	H	H	H	H	G	H	-	H	H	H	Y	H	H	G	G	H	G	H	H	H	H	H	H	H	Y	H	Y	H	H	H	Y	Y
AX-183574378	II	26.57	Chr6	32738945	1.22e-27	chr6LG2	26255304			H	H	H	Y	G	Y	H	-	H	H	H	H	G	H	H	H	H	H	Y	H	H	G	G	H	G	H	H	H	H	H	H	H	-	H	Y	H	H	H	Y	Y
AX-183866420	II	26.57	Chr6	32738962	1.22e-27	chr6LG2	26255287			H	H	H	Y	G	Y	H	Y	H	H	H	H	G	H	H	H	H	H	Y	H	H	G	G	H	G	H	H	H	H	H	H	H	Y	H	Y	H	H	H	Y	Y
AX-183579290	II	26.57	Chr6	33116277	2.61e-29	chr6LG2	26725920			H	H	H	Y	G	Y	H	Y	H	H	H	H	G	H	H	H	H	H	Y	H	H	G	G	H	G	H	H	H	H	H	H	H	-	H	Y	H	H	H	Y	Y
AX-183640375	II	26.57	Chr6	33118909	1.22e-27	chr6LG2	26723288			H	H	H	Y	G	Y	H	Y	H	H	H	H	-	-	H	H	H	H	Y	H	H	G	G	G	G	H	-	H	H	H	H	H	-	H	Y	H	H	H	Y	Y
AX-183568397	II	26.57	Chr6	33119788	2.61e-29	chr6LG2	26722409			H	H	H	Y	G	Y	H	Y	H	H	H	H	G	H	H	H	H	H	Y	H	H	G	G	H	G	H	H	H	H	H	H	H	-	H	Y	H	H	H	Y	Y
AX-183620014	II	26.57	Chr6	33122195	1.22e-27	chr6LG2	26720002			H	H	H	Y	G	Y	H	Y	H	H	H	H	G	H	H	H	H	H	Y	H	H	G	G	H	G	H	H	H	H	H	H	H	Y	H	Y	H	H	H	Y	Y
AX-183871796	II	26.57	Chr6	33205733	2.61e-29	chr6LG2	26638516			H	H	H	Y	G	Y	H	Y	H	H	H	H	G	H	H	H	H	H	Y	H	H	G	G	H	G	H	H	H	H	H	H	H	-	H	Y	H	H	H	Y	Y
AX-183869026	II	26.57	Chr6	33243130	2.61e-29	chr6LG2	26611661			H	H	H	Y	G	Y	H	Y	H	H	H	H	G	H	H	H	H	H	Y	H	H	G	G	H	G	H	H	H	H	H	H	H	Y	H	Y	H	H	H	Y	Y
AX-183879286	II	26.57	Chr6	33259162	1.22e-27	chr6LG2	26595555			H	H	H	Y	G	Y	H	-	H	-	H	H	G	H	H	H	H	H	Y	H	H	G	G	H	G	H	H	H	H	-	H	H	-	H	Y	H	H	H	Y	Y
AX-183864508	II	26.57	Chr6	33260133	1.22e-27	chr6LG2	26594584			H	H	H	Y	G	Y	H	Y	H	H	H	H	G	H	H	H	H	H	Y	H	H	G	G	H	G	H	H	H	H	H	H	H	Y	H	Y	H	H	H	Y	Y
AX-183870051	II	26.57	Chr6	33326202	1.22e-27	scaffold00839	8154			H	H	H	Y	G	Y	H	Y	H	H	H	H	G	H	H	H	H	H	Y	H	H	G	G	H	G	H	H	H	H	H	H	H	Y	H	Y	H	H	H	Y	Y
AX-183620008	II	26.57	Chr6	33331947	1.22e-27	scaffold00839	13899			H	H	H	Y	G	Y	H	Y	H	H	H	H	G	H	H	H	H	H	Y	H	H	G	G	H	G	H	H	H	H	H	H	H	Y	H	Y	H	H	H	Y	Y
AX-183620053	II	26.57	Chr6	33471255	2.61e-29	chr6LG2	27067085			H	-	H	Y	G	Y	H	Y	-	H	H	H	-	H	H	H	H	H	Y	H	H	G	G	H	G	H	Y	H	H	H	H	H	-	H	Y	H	H	H	Y	Y
AX-183863364	II	26.57	Chr6	33512671	2.61e-29	chr6LG2	27029757			H	H	H	Y	G	Y	H	Y	Y	H	H	H	G	H	H	H	H	H	Y	H	H	G	G	H	G	H	H	H	H	H	H	H	Y	H	Y	H	H	H	Y	Y
AX-183860599	II	26.57	Chr6	33521622	1.22e-27	chr6LG2	27020739			H	H	H	Y	G	Y	H	Y	Y	H	H	H	G	H	H	H	H	H	Y	H	H	G	G	H	G	H	H	H	H	H	H	H	Y	H	Y	H	H	H	Y	Y
AX-183863916	II	26.57	Chr6	33553785	1.22e-27	chr6LG2	26984936			H	H	H	Y	G	Y	H	Y	Y	H	H	H	G	H	H	H	H	H	Y	H	H	G	G	H	G	H	H	H	H	H	H	H	Y	H	Y	H	H	H	Y	Y
AX-183868131	II	26.57	Chr6	33632776	1.22e-27	chr6LG2	26903564			H	H	H	Y	G	Y	H	Y	Y	H	H	H	G	H	H	H	H	H	Y	H	H	G	G	H	G	H	H	H	H	H	H	H	Y	H	Y	H	H	H	Y	Y
AX-183620034	II	26.57	Chr6	33634374	9.46e-24	chr6LG2	26901947			H	H	H	Y	G	Y	H	Y	Y	H	H	H	-	H	H	H	H	H	Y	H	H	G	G	H	G	H	H	H	H	H	H	H	-	H	Y	H	H	H	Y	Y
AX-183620029	II	26.57	Chr6	33685806	1.22e-27	chr6LG2	26879974			H	H	H	Y	G	Y	H	Y	Y	H	H	H	G	H	H	H	H	H	Y	H	H	G	G	H	G	H	H	H	H	H	H	H	-	H	Y	H	H	H	Y	Y
AX-183620027	II	26.57	Chr6	33693283	1.22e-27	chr6LG2	26859319			H	H	H	Y	-	Y	H	H	Y	H	H	H	G	H	H	H	H	H	Y	H	H	-	H	H	G	H	H	H	H	H	H	-	-	H	-	-	H	H	Y	Y
AX-183620026	II	26.57	Chr6	33693995	1.22e-27	chr6LG2	26858607			H	H	H	Y	G	Y	H	Y	Y	H	H	H	G	H	H	H	H	H	Y	H	H	G	G	H	G	H	H	H	H	H	H	H	Y	H	Y	H	H	H	Y	Y
AX-183620024	II	26.57	Chr6	33697084	2.61e-29	chr6LG2	26855540			H	H	H	Y	G	Y	H	Y	Y	H	H	H	G	H	H	H	H	H	Y	H	H	G	G	H	G	H	H	H	H	H	H	H	Y	H	Y	H	H	H	Y	Y
AX-183640383	II	26.57	Chr6	33698806	2.61e-29	chr6LG2	26853829			H	H	H	Y	G	Y	H	Y	Y	H	H	H	G	H	H	H	H	H	Y	H	H	G	G	H	G	H	H	H	H	H	H	H	-	H	Y	H	H	H	Y	Y
AX-183979573	II	26.57	Chr6	33699904	2.61e-29	chr6LG2	26852731			H	H	H	Y	G	Y	H	Y	Y	H	H	H	G	H	H	H	H	H	Y	H	H	G	G	H	G	H	H	H	H	H	H	H	Y	H	Y	H	H	H	Y	Y
AX-183579291	II	26.57	Chr6	33725455	1.22e-27	chr6LG2	26828595			H	H	H	Y	G	Y	H	Y	Y	H	H	H	G	H	H	H	H	H	Y	H	H	G	G	H	G	H	H	H	H	H	H	H	Y	H	Y	H	H	H	Y	Y
AX-183626352	II	26.57	Chr6	34043930	2.63e-24	chr6LG2	27624117			H	H	H	Y	G	Y	H	Y	Y	H	H	H	G	-	H	H	H	H	Y	H	H	G	G	H	G	H	H	H	H	H	H	H	H	H	Y	-	H	-	Y	Y
AX-183867590	II	26.57	Chr6	34044134	1.22e-27	chr6LG2	27624320			H	H	H	Y	G	Y	H	Y	Y	H	H	H	G	H	H	H	H	H	Y	H	H	G	G	H	G	H	H	H	H	-	H	H	Y	H	Y	H	H	H	Y	Y
AX-183877318	II	26.57	Chr6	34045282	1.22e-27	chr6LG2	27625462			H	H	H	Y	G	Y	H	H	Y	H	H	H	G	H	H	H	H	H	Y	H	H	G	G	-	G	H	H	H	H	H	H	H	H	H	Y	H	H	H	Y	Y
AX-183574510	II	26.57	Chr6	34052534	1.22e-27	chr6LG2	27631929			H	H	H	Y	G	Y	H	Y	Y	H	H	H	G	H	H	H	H	H	Y	H	H	G	G	H	G	H	H	H	H	H	H	H	Y	H	Y	H	H	H	Y	Y
AX-183626354	II	26.69	Chr6	34097331	2.03e-25	chr6LG2	27679901			H	H	H	Y	G	Y	H	Y	Y	H	H	H	G	H	H	H	H	H	Y	H	H	G	G	H	G	H	H	H	H	H	H	H	Y	H	Y	H	H	H	Y	Y
AX-183626357	II	26.69	Chr6	34205141	1.22e-27	chr6LG2	27740923			H	H	H	Y	G	Y	H	Y	Y	H	H	H	G	H	H	H	H	H	Y	H	H	G	G	H	G	H	H	H	H	H	H	H	Y	H	Y	H	H	H	Y	Y
AX-183572075	II	26.82	Chr6	34226835	5.65e-26	chr6LG2	27751709			H	H	H	Y	G	Y	H	Y	Y	H	H	H	G	H	H	H	H	H	H	H	H	G	G	H	G	H	H	H	H	H	H	H	Y	H	Y	H	H	H	Y	Y
AX-183575058	II	26.94	Chr6	34395079	1.22e-27	chr6LG2	4333044			H	H	H	Y	G	Y	H	Y	Y	H	H	H	G	H	H	H	H	H	Y	H	H	G	G	H	G	H	H	H	H	H	H	H	Y	H	Y	H	H	H	Y	Y
AX-183616777	II	26.94	Chr6	34424767	5.65e-26	chr6LG2	4186547			H	H	H	Y	G	Y	H	Y	Y	H	H	H	G	H	H	H	H	H	Y	H	H	G	G	H	G	H	-	-	H	-	H	H	Y	H	Y	H	H	H	Y	Y
AX-183616770	II	26.94	Chr6	34570060	5.65e-26	chr6LG2	4095483			H	H	H	Y	G	Y	H	Y	Y	H	H	H	-	H	H	H	H	H	Y	H	H	G	G	H	G	H	H	H	H	H	H	H	Y	H	Y	H	H	H	Y	Y
AX-183616769	II	26.94	Chr6	34680921	1.22e-27	chr6LG2	4003400			H	H	H	Y	G	Y	H	Y	Y	H	H	H	G	H	H	H	H	H	Y	H	H	G	G	H	G	H	H	H	H	H	H	H	Y	H	Y	H	H	H	Y	Y
AX-183620074	II	26.94	Chr6	34728102	1.57e-26	chr6LG2	27242171			H	H	H	Y	G	Y	H	Y	Y	H	H	H	G	H	H	H	H	H	Y	H	H	G	G	-	G	H	H	H	H	H	H	H	Y	H	Y	H	H	H	Y	Y
AX-183882037	II	26.94	Chr6	34731726	2.61e-29	chr6LG2	27245945			H	H	H	Y	G	Y	H	-	Y	H	H	H	G	H	H	H	H	H	Y	H	H	G	G	H	G	H	H	H	H	H	H	H	Y	H	Y	H	H	H	Y	Y
AX-183568405	II	26.94	Chr6	34786374	1.22e-27	chr6LG2	27285082			H	H	H	Y	G	Y	H	Y	Y	H	H	H	H	H	H	H	H	H	Y	H	H	G	G	H	G	H	H	H	H	H	H	H	Y	H	Y	H	H	H	Y	Y
AX-183579294	II	27.06	Chr6	34797653	5.65e-26	chr6LG2	27314266			H	H	H	Y	G	H	H	Y	Y	H	H	H	-	H	H	H	-	H	Y	H	H	G	G	-	G	H	H	H	H	H	H	H	H	H	Y	H	H	H	Y	-
AX-183620064	II	27.06	Chr6	34815825	5.65e-26	chr6LG2	27314461			H	H	H	Y	G	Y	H	Y	Y	H	H	H	G	H	H	H	H	H	Y	H	H	G	G	H	G	H	H	H	H	H	H	H	H	H	Y	H	H	H	Y	Y
AX-183869316	II	27.19	Chr6	34816203	2.61e-29	chr6LG2	27314839			H	H	H	Y	G	Y	H	Y	Y	H	H	H	G	H	H	H	H	H	Y	H	H	G	G	H	G	H	H	H	H	H	H	H	Y	H	Y	H	H	H	Y	Y
AX-183620091	II	27.31	Chr6	35037763	2.61e-29	chr6LG2	27420978			H	H	H	Y	G	Y	H	Y	Y	H	H	H	G	H	H	H	H	H	-	H	H	G	G	H	G	H	-	H	H	H	H	H	Y	H	Y	H	H	H	Y	Y
AX-183568410	II	27.31	Chr6	35055517	1.22e-27	chr6LG2	27442243			H	H	H	Y	G	Y	H	Y	Y	H	H	H	G	H	H	H	H	H	Y	H	H	G	G	H	G	H	Y	H	H	H	H	H	Y	H	Y	H	H	H	Y	Y
AX-183568411	II	27.43	Chr6	35094899	1.22e-27	chr6LG2	27470343			H	H	H	Y	G	Y	H	Y	Y	H	H	H	G	H	H	H	H	H	Y	H	H	G	G	H	G	H	Y	H	H	H	H	H	Y	H	Y	H	H	H	Y	Y
AX-183620092	II	27.43	Chr6	35095174	2.61e-29	chr6LG2	27470618			H	H	H	Y	G	Y	H	Y	Y	H	H	H	G	H	H	H	H	H	Y	H	H	G	G	H	G	H	Y	H	H	H	H	H	Y	H	Y	H	H	H	Y	Y
AX-183872387	II	27.43	Chr6	35095189	1.22e-27	chr6LG2	27470633			H	H	H	Y	G	Y	H	Y	Y	H	H	H	G	H	H	H	H	H	Y	H	H	G	G	H	G	H	Y	H	H	H	H	H	Y	H	Y	H	H	H	Y	Y
AX-183880854	II	27.43	Chr6	35095668	1.22e-27	chr6LG2	27471112			H	H	H	Y	G	Y	H	Y	Y	H	H	H	G	H	H	H	H	H	Y	H	H	G	G	H	G	H	Y	H	H	H	H	H	Y	H	Y	H	H	H	Y	Y
AX-183864885	II	27.43	Chr6	35095975	2.63e-24	chr6LG2	27471419			H	H	H	Y	G	Y	H	Y	Y	H	H	H	G	H	H	H	H	H	Y	H	H	G	G	H	G	H	H	H	H	H	H	H	Y	H	Y	H	H	H	Y	Y
AX-183571915	II	27.43	Chr6	35097001	1.22e-27	chr6LG2	27472443			H	H	H	Y	G	Y	H	-	Y	H	H	H	G	H	H	H	H	H	Y	H	H	G	G	H	G	H	Y	H	H	H	H	H	-	H	Y	H	H	H	-	Y
AX-183620126	II	27.81	Chr6	35782358	1.22e-27	chr6LG2	3308241			H	H	H	Y	G	Y	H	Y	Y	H	H	H	-	H	H	H	H	H	Y	H	H	G	G	H	G	H	H	H	H	H	H	H	Y	H	Y	H	H	H	Y	Y
AX-183568416	II	27.81	Chr6	35911169	1.22e-27	chr6LG2	3377397			H	H	H	Y	G	Y	H	Y	Y	H	H	H	G	H	H	H	H	H	Y	H	H	G	G	H	G	H	H	H	H	H	H	H	H	H	Y	H	H	H	Y	Y
AX-183880855	II	27.81	Chr6	36144619	1.22e-27	chr6LG2	27972095			H	H	H	Y	G	Y	H	-	Y	H	H	H	G	H	H	H	H	H	Y	H	H	G	G	H	G	H	Y	H	H	H	H	H	Y	H	Y	H	H	H	Y	Y
AX-183568418	II	28.06	Chr6	36306900	2.61e-29	chr6LG2	28124201			H	-	H	Y	G	Y	H	Y	Y	H	H	H	-	H	H	H	G	H	Y	H	-	G	G	H	G	H	Y	H	H	H	-	H	-	H	Y	-	H	H	Y	Y
AX-183579303	II	28.06	Chr6	36317702	2.61e-29	chr6LG2	28526867			H	H	H	Y	G	Y	H	Y	Y	H	H	H	G	H	H	H	H	H	Y	H	H	G	G	H	G	H	Y	H	H	H	H	H	Y	H	Y	H	H	H	Y	Y
AX-183871041	II	28.06	Chr6	36337346	2.61e-29	chr6LG2	28996830			H	H	H	Y	G	Y	H	Y	Y	H	H	H	G	H	H	H	H	H	Y	H	H	G	G	H	G	H	Y	H	H	H	H	H	Y	H	Y	H	H	H	Y	Y
AX-183616707	II	28.18	Chr6	36881559	2.61e-29	chr6LG2	29762702			H	H	H	Y	G	Y	H	Y	Y	H	H	H	G	H	H	H	H	H	Y	H	H	G	G	H	G	H	Y	H	H	H	H	H	Y	H	Y	H	H	H	Y	Y
AX-183579039	II	28.18	Chr6	36882237	2.61e-29	chr6LG2	29762024			H	H	H	Y	G	Y	H	Y	Y	H	H	H	G	H	H	H	H	H	Y	H	H	G	G	H	G	H	Y	H	H	H	H	H	Y	H	Y	H	H	H	Y	Y
AX-183568095	II	28.18	Chr6	36909357	2.61e-29	chr6LG2	29726494			H	H	H	Y	G	Y	H	Y	Y	H	H	H	G	H	H	H	H	H	Y	H	H	G	G	H	G	H	H	H	H	H	H	H	Y	H	Y	H	H	H	Y	Y
AX-183889655	II	28.3	Chr6	37038964	1.22e-27	chr6LG2	29614416			H	H	H	Y	G	Y	H	Y	Y	H	H	Y	G	H	H	H	H	H	Y	H	H	G	G	H	G	H	Y	H	H	H	H	H	Y	H	Y	H	H	H	Y	Y
AX-183616701	II	28.3	Chr6	37097289	5.65e-26	chr6LG2	29527198			H	H	H	Y	G	Y	H	Y	Y	H	H	Y	G	H	H	H	H	H	Y	H	H	G	G	H	G	H	Y	H	H	H	H	H	Y	H	Y	H	H	H	Y	Y
AX-183877722	II	28.3	Chr6	37192144	2.61e-29	chr6LG2	29476907			H	H	H	Y	G	Y	H	Y	Y	H	H	Y	G	H	H	H	H	H	Y	H	H	G	G	H	G	H	Y	H	H	H	H	H	Y	H	Y	H	H	H	Y	Y
AX-183882005	II	28.3	Chr6	37192185	5.65e-26	chr6LG2	29476866			H	H	H	Y	G	Y	H	H	Y	H	H	Y	G	H	H	H	H	H	Y	H	H	G	G	H	G	H	Y	H	H	H	H	H	-	H	Y	H	H	H	Y	Y
AX-183620405	II	28.55	Chr6	37541354	2.61e-29	chr6LG2	30058412			H	H	H	Y	G	Y	H	Y	Y	H	H	Y	G	H	H	H	H	H	Y	H	H	G	G	H	G	H	H	H	H	H	H	H	Y	H	Y	H	H	H	Y	Y
AX-183877803	II	28.55	Chr6	38104053	5.65e-26	chr6LG2	28411140			H	H	H	Y	G	Y	H	-	Y	H	H	Y	G	H	H	H	H	H	-	H	H	G	G	H	G	H	H	H	H	H	H	H	H	H	Y	H	H	H	Y	Y
AX-183886887	II	28.55	Chr6	38105428	1.22e-27	chr6LG2	28412505			H	H	H	Y	G	Y	H	Y	Y	H	H	Y	G	H	H	H	H	H	Y	H	H	G	G	H	G	H	Y	H	H	H	H	H	-	H	Y	H	H	H	Y	Y
AX-183626342	II	28.68	Chr6	38107823	2.61e-29	chr6LG2	28414909			H	-	H	Y	G	-	H	Y	Y	H	H	Y	G	H	H	H	H	H	Y	H	H	G	G	H	G	H	-	H	H	H	H	H	Y	H	Y	H	H	H	Y	Y
AX-183878762	II	28.68	Chr6	38126657	1.22e-27	chr6LG2	30124180			H	H	H	Y	G	Y	H	Y	Y	H	H	Y	G	H	H	H	H	H	Y	H	H	G	G	H	G	H	H	H	H	H	H	H	Y	H	Y	H	H	H	Y	Y
AX-183620394	II	28.68	Chr6	38132664	5.65e-26	chr6LG2	30114574			H	H	H	Y	G	Y	H	Y	Y	H	H	Y	G	H	H	H	H	H	Y	H	H	G	G	H	G	H	Y	H	H	H	H	H	Y	H	Y	H	H	H	Y	Y
AX-183883138	II	28.68	Chr6	38152518	1.22e-27	chr6LG2	30090599			H	H	H	Y	G	Y	H	Y	Y	H	H	Y	G	H	H	H	H	H	Y	H	H	G	G	H	G	H	Y	H	H	H	H	H	Y	H	Y	H	H	H	Y	Y
AX-183620392	II	28.68	Chr6	38161751	1.22e-27	chr6LG2	30077386			H	-	H	Y	G	Y	H	H	Y	H	-	Y	G	-	H	H	H	-	Y	H	H	G	G	H	G	H	H	H	H	-	H	H	Y	-	Y	H	H	G	Y	Y
AX-183620437	II	28.68	Chr6	38201252	5.65e-26	chr6LG2	30479095			H	H	H	Y	G	Y	H	Y	Y	H	H	Y	G	H	H	H	H	H	Y	H	H	G	G	H	G	H	Y	H	H	H	H	H	Y	H	Y	H	H	H	Y	Y
AX-183620436	II	28.68	Chr6	38201283	2.61e-29	chr6LG2	30479064			H	H	H	Y	G	Y	H	Y	Y	H	H	Y	G	H	H	H	H	H	Y	H	H	G	G	H	G	H	H	H	H	H	H	H	Y	H	Y	H	H	H	Y	Y
AX-183871535	II	28.68	Chr6	38203523	5.65e-26	chr6LG2	30477113			H	H	H	Y	G	Y	H	Y	Y	H	H	Y	G	H	H	H	H	H	Y	H	H	G	G	H	G	H	H	H	H	H	H	H	Y	H	Y	H	H	H	Y	Y
AX-183620433	II	28.68	Chr6	38219106	1.22e-27	chr6LG2	30460345			H	H	H	Y	G	Y	H	Y	Y	H	H	Y	G	H	H	H	H	H	Y	H	H	G	G	H	G	H	Y	H	H	H	H	H	Y	H	Y	H	H	H	Y	Y
AX-183885803	II	28.68	Chr6	38219462	1.22e-27	chr6LG2	30459989			H	H	H	Y	G	Y	H	Y	Y	H	H	Y	G	H	H	H	H	H	Y	H	H	G	G	H	G	H	Y	H	H	H	H	H	Y	H	Y	H	H	H	Y	Y
AX-183579319	II	28.68	Chr6	38224465	2.61e-29	chr6LG2	30454983			H	H	H	Y	G	Y	H	Y	Y	H	H	Y	G	H	H	H	H	H	Y	H	H	G	G	H	G	H	Y	H	H	H	H	H	Y	H	Y	H	H	H	Y	Y
AX-183891041	II	28.68	Chr6	38229660	2.61e-29	chr6LG2	30449781			H	H	H	Y	G	Y	H	Y	Y	H	H	Y	G	H	H	H	H	H	Y	H	H	G	G	H	G	H	-	H	H	H	H	H	Y	H	Y	H	H	H	Y	Y
AX-183581886	II	28.68	Chr6	38499404	5.65e-26	chr6LG2	30300072			H	H	H	Y	G	Y	H	Y	Y	H	H	Y	G	H	H	H	H	H	Y	H	H	G	G	H	G	H	H	H	H	H	H	H	H	H	Y	H	H	H	Y	Y
AX-183568441	II	28.68	Chr6	38501088	1.22e-27	chr6LG2	30297418			H	H	H	Y	G	Y	H	Y	Y	H	H	Y	G	H	H	H	H	H	Y	H	H	G	G	H	G	H	Y	H	H	H	H	H	Y	H	Y	H	H	H	Y	Y
AX-183620420	II	28.68	Chr6	38501551	2.61e-29	chr6LG2	30296955			H	Y	H	Y	G	Y	H	H	Y	H	H	Y	G	H	H	H	H	H	Y	H	H	G	G	H	G	H	Y	H	H	H	H	H	-	H	Y	H	H	H	Y	Y
AX-183893741	II	28.8	Chr6	38607644	2.63e-24	chr6LG2	30244898			H	H	H	Y	G	Y	H	Y	Y	H	H	Y	G	H	H	H	H	H	Y	H	H	G	G	H	G	H	H	H	H	H	H	H	Y	H	Y	H	H	H	Y	Y
AX-183620410	II	28.92	Chr6	38690945	1.22e-27	chr6LG2	30173128			H	H	H	Y	G	Y	H	Y	Y	H	H	Y	G	H	H	H	H	H	Y	H	H	H	G	H	G	H	Y	H	H	H	H	H	Y	H	Y	H	H	H	Y	Y
AX-183620409	II	28.92	Chr6	38696555	2.61e-29	chr6LG2	30167527			H	H	H	Y	G	Y	H	Y	Y	H	H	Y	G	H	H	H	H	H	Y	H	H	H	G	H	G	H	H	H	H	H	H	H	Y	H	Y	H	H	H	Y	Y
AX-183640420	II	28.92	Chr6	38873858	2.61e-29	chr6LG2	28889227			H	H	H	Y	G	Y	H	Y	Y	H	H	Y	G	H	H	H	H	H	Y	H	H	H	G	H	G	H	Y	H	H	H	H	H	Y	H	Y	H	H	H	Y	Y
AX-183620495	II	29.17	Chr6	39222351	1.22e-27	chr6LG2	28636182			H	H	H	Y	G	Y	H	Y	Y	H	H	Y	G	H	H	H	H	H	H	H	H	H	G	H	G	H	Y	H	H	H	H	H	Y	H	Y	H	H	H	Y	Y
AX-183878765	II	29.17	Chr6	39223446	5.65e-26	chr6LG2	28635027			H	H	H	Y	G	Y	H	Y	Y	H	H	Y	G	H	H	H	H	H	Y	H	H	H	G	H	G	H	Y	H	H	H	H	H	Y	H	Y	H	H	H	Y	Y
AX-183620460	II	29.17	Chr6	39361471	2.61e-29	scaffold01315	7939			H	H	H	Y	G	Y	H	Y	Y	H	H	Y	G	H	H	H	H	H	Y	H	H	H	G	H	G	H	Y	H	H	H	-	H	Y	H	Y	H	H	H	Y	Y
AX-183568444	II	29.3	Chr6	39592947	1.22e-27	scaffold01315	227731			H	H	H	Y	G	Y	H	Y	Y	H	H	Y	G	H	H	H	H	H	Y	H	H	H	G	H	G	H	Y	H	H	H	H	H	Y	H	Y	H	H	H	Y	Y
AX-183620546	II	29.42	Chr6	39845444	1.22e-27	chr6LG2	30543359			H	H	H	Y	G	Y	H	Y	Y	H	H	Y	G	-	H	H	H	H	Y	H	H	H	G	H	G	H	-	H	H	H	H	H	Y	H	Y	H	H	H	Y	Y
AX-183862596	II	29.42	Chr6	39939734	2.61e-29	chr6LG2	30642241			H	H	H	Y	G	Y	H	Y	Y	H	H	Y	G	H	H	H	H	H	Y	H	H	H	G	H	G	H	H	H	H	H	H	H	Y	H	Y	H	H	H	Y	Y
AX-183568447	II	29.42	Chr6	39940069	2.61e-29	chr6LG2	30642575			H	H	H	Y	G	Y	H	Y	Y	H	H	Y	G	H	H	H	H	H	Y	H	H	H	H	H	G	H	H	H	H	H	-	H	Y	H	Y	H	H	H	Y	Y
AX-183884182	II	29.42	Chr6	39942495	2.61e-29	chr6LG2	30644942			H	H	H	Y	G	Y	H	Y	Y	H	H	Y	G	H	H	H	H	H	Y	H	H	H	G	H	G	H	-	H	H	H	H	H	-	H	Y	H	H	H	Y	Y
AX-183579325	II	29.42	Chr6	40061362	2.61e-29	chr6LG2	30754178			H	H	H	Y	G	Y	H	Y	Y	H	H	Y	G	H	H	H	H	H	Y	H	H	H	G	H	G	H	-	H	H	H	H	H	-	H	Y	H	H	H	Y	Y
AX-183620526	II	29.67	Chr6	40257741	1.22e-27	chr6LG2	30964855			H	H	H	Y	G	Y	H	Y	Y	H	H	Y	G	H	H	H	H	H	Y	H	H	H	G	H	G	H	Y	H	H	H	H	H	H	H	Y	H	H	H	Y	Y
AX-183620523	II	29.79	Chr6	40260688	2.61e-29	chr6LG2	30967783			H	H	H	Y	G	Y	H	H	Y	H	H	Y	G	H	H	H	H	H	Y	H	H	H	G	H	G	H	H	H	H	H	H	H	-	H	Y	H	H	H	Y	Y
AX-183620604	II	29.79	Chr6	40575114	1.22e-22	chr6LG2	32394741			H	H	H	Y	G	Y	H	Y	Y	H	H	Y	G	H	H	H	H	H	Y	H	H	H	G	H	G	H	H	H	H	H	H	H	Y	H	Y	H	H	H	Y	Y
AX-183877753	II	29.79	Chr6	40575326	2.61e-29	chr6LG2	32394959			H	H	H	Y	G	Y	H	Y	Y	H	H	Y	G	H	H	H	H	H	Y	H	H	H	G	H	G	H	H	H	H	H	H	H	Y	H	Y	H	H	H	Y	Y
AX-183620610	II	29.79	Chr6	40622840	1.57e-26	chr6LG2	32495024			H	H	H	Y	G	Y	H	Y	Y	H	H	Y	-	H	-	H	H	H	Y	H	H	H	G	H	G	H	H	H	H	H	H	H	-	H	Y	H	H	H	Y	Y
AX-183620611	II	29.79	Chr6	40623690	2.61e-29	chr6LG2	32495875			H	H	H	Y	G	Y	H	Y	Y	H	H	Y	G	H	H	H	H	H	-	H	H	H	G	H	G	H	H	H	G	H	H	H	Y	H	Y	H	H	H	Y	Y
AX-183620616	II	29.79	Chr6	40670850	2.61e-29	chr6LG2	32537949			H	H	H	Y	G	Y	H	Y	Y	H	H	Y	G	H	H	H	H	H	Y	H	H	H	G	H	G	H	H	H	H	H	H	H	Y	H	Y	H	H	H	Y	Y
AX-183579334	II	29.92	Chr6	40675210	2.61e-29	chr6LG2	32542337			H	H	H	Y	G	Y	H	Y	Y	H	H	Y	G	H	H	H	H	H	Y	H	H	H	-	H	G	H	Y	H	H	H	H	H	Y	H	Y	H	H	H	Y	Y
AX-183620619	II	29.92	Chr6	40678342	1.22e-27	chr6LG2	32545469			H	H	H	-	G	Y	H	-	Y	H	H	Y	G	H	H	H	H	H	Y	H	H	H	G	Y	G	H	Y	H	H	H	H	H	Y	H	Y	H	H	H	Y	Y
AX-183878766	II	29.92	Chr6	40680235	1.22e-27	chr6LG2	32547378			H	H	H	Y	G	Y	H	Y	Y	H	H	Y	G	H	H	H	H	H	Y	H	H	H	G	H	G	H	Y	H	H	H	H	H	Y	H	Y	H	H	H	Y	Y
AX-183874526	II	30.04	Chr6	40794418	2.61e-29	chr6LG2	32601563			H	H	H	Y	G	Y	H	Y	Y	H	H	Y	G	H	H	H	H	H	Y	H	H	H	G	H	G	H	Y	H	H	H	H	H	H	H	Y	H	H	H	Y	Y
AX-183579327	II	30.29	Chr6	41046857	2.61e-29	chr6LG2	32336815			H	H	H	Y	G	Y	H	Y	Y	H	H	Y	G	H	H	H	H	H	Y	H	H	H	G	H	G	H	-	H	H	H	H	H	Y	H	Y	H	H	H	Y	Y
AX-183863091	II	30.41	Chr6	41154425	5.65e-26	chr6LG2	33485998			H	H	H	Y	G	Y	H	Y	Y	H	H	Y	G	H	H	H	H	H	Y	H	H	H	G	H	G	H	Y	H	H	H	H	H	-	H	Y	H	H	H	Y	Y
AX-183886824	II	30.41	Chr6	41155210	2.61e-29	chr6LG2	33486783			H	H	H	Y	G	Y	H	Y	Y	H	H	Y	G	H	H	H	H	H	Y	H	H	H	G	-	G	H	Y	H	H	H	H	H	Y	H	Y	H	H	H	Y	Y
AX-183620580	II	30.41	Chr6	41158702	5.65e-26	chr6LG2	33490305			H	H	H	Y	G	Y	H	Y	Y	H	H	Y	G	H	H	H	H	H	Y	H	H	H	G	G	G	H	-	H	H	H	-	H	Y	H	Y	H	H	H	Y	Y
AX-183579330	II	30.41	Chr6	41158716	5.65e-26	chr6LG2	33490319			H	H	H	Y	G	Y	H	-	Y	H	H	Y	G	H	H	H	H	H	Y	H	H	H	G	H	G	H	Y	H	H	H	H	H	Y	H	Y	H	H	H	Y	Y
AX-183581888	II	30.41	Chr6	41159403	1.22e-27	chr6LG2	33490989			H	H	H	Y	G	Y	H	Y	Y	H	H	Y	G	H	H	H	H	H	Y	H	H	H	G	H	G	H	H	H	H	H	H	H	Y	H	Y	H	H	H	Y	Y
AX-183620585	II	30.41	Chr6	41232167	2.61e-29	chr6LG2	33522082			H	H	H	Y	G	Y	H	Y	Y	H	H	Y	G	H	H	H	H	H	Y	H	H	H	G	H	G	H	Y	H	H	H	H	H	Y	H	Y	H	H	H	Y	Y
AX-183892636	II	30.41	Chr6	41250727	1.22e-27	chr6LG2	33545803			H	H	H	Y	G	Y	H	Y	Y	H	H	Y	G	H	H	H	H	H	Y	H	H	H	G	H	G	H	Y	H	H	H	H	H	Y	H	Y	H	H	H	Y	Y
AX-183862318	II	30.54	Chr6	41502034	1.22e-27	chr6LG2	34220375			H	H	H	-	G	Y	H	H	Y	H	H	Y	G	-	H	H	H	H	Y	H	H	H	G	H	G	H	-	H	H	H	H	H	H	H	Y	H	H	H	Y	Y
AX-183620558	II	30.54	Chr6	41504391	1.22e-27	chr6LG2	34218067			H	H	H	Y	G	Y	H	Y	Y	H	H	Y	G	H	H	H	H	H	Y	H	H	H	G	H	G	H	H	H	H	H	H	H	H	H	Y	H	H	H	Y	Y
AX-183620556	II	30.54	Chr6	41505576	2.63e-24	chr6LG2	34216884			H	H	H	Y	G	Y	H	Y	Y	H	H	Y	-	H	H	H	H	H	Y	H	H	H	G	H	G	H	Y	H	H	H	H	H	Y	H	Y	H	H	H	Y	Y
AX-183620555	II	30.54	Chr6	41506022	1.22e-27	chr6LG2	34216440			H	H	H	Y	G	Y	H	Y	Y	H	H	Y	H	H	H	H	H	H	Y	H	H	H	G	H	G	H	Y	H	H	H	H	H	H	H	Y	H	H	H	Y	Y
AX-183861925	II	30.54	Chr6	41641844	1.22e-27	chr6LG2	31615538			H	H	H	Y	G	Y	H	-	Y	H	H	Y	G	H	H	H	H	H	Y	H	H	H	G	H	G	H	-	H	H	H	H	H	-	H	Y	H	H	H	Y	Y
AX-183571923	II	30.54	Chr6	41651096	2.61e-29	chr6LG2	31624777			H	H	H	Y	G	Y	H	Y	Y	H	H	Y	-	H	H	H	H	H	Y	H	H	H	G	H	G	H	H	H	H	H	H	H	-	H	Y	H	H	H	Y	Y
AX-183620597	II	30.54	Chr6	41657079	1.22e-27	chr6LG2	31630766			H	H	H	Y	G	Y	H	Y	Y	H	H	Y	G	H	H	H	H	H	Y	H	H	H	G	H	G	H	Y	H	H	H	H	H	Y	H	Y	H	H	H	Y	Y
AX-183568454	II	30.54	Chr6	41700068	2.61e-29	chr6LG2	32971245			H	H	H	Y	G	Y	H	Y	Y	H	H	Y	G	H	H	H	H	H	-	H	H	H	G	H	G	H	H	H	H	H	H	H	-	H	Y	H	H	H	Y	Y
AX-183568455	II	30.54	Chr6	41700851	1.22e-27	chr6LG2	32972028			H	H	H	Y	G	Y	H	-	Y	H	H	Y	G	H	G	H	H	H	Y	H	H	H	G	-	G	H	H	H	H	H	H	H	H	H	Y	H	H	H	Y	Y
AX-183888340	II	30.54	Chr6	41701845	2.61e-29	chr6LG2	32973022			H	H	H	Y	G	Y	H	Y	Y	H	H	Y	G	H	H	H	H	H	Y	H	H	H	G	H	G	H	-	H	H	H	H	H	-	H	Y	H	H	H	Y	Y
AX-183867512	II	30.54	Chr6	41702602	2.61e-29	chr6LG2	32973781			H	H	H	Y	G	Y	H	Y	Y	H	H	Y	G	H	H	H	H	H	Y	H	H	H	G	H	G	H	Y	H	H	H	H	H	Y	H	Y	H	H	H	Y	Y
AX-183865452	II	30.66	Chr6	41931515	5.65e-26	chr6LG2	33102744			H	H	H	Y	G	Y	H	Y	Y	H	H	Y	G	H	H	H	H	H	Y	H	H	H	G	H	G	H	Y	H	H	H	H	H	Y	H	Y	H	H	H	Y	Y
AX-183568456	II	30.66	Chr6	42062420	5.65e-26	chr6LG2	33198001			H	H	H	Y	G	Y	H	Y	Y	H	H	Y	G	H	H	H	H	H	Y	H	H	H	G	H	G	H	H	H	H	H	H	H	Y	H	Y	H	H	H	Y	Y
AX-183863801	II	30.66	Chr6	42065664	1.22e-27	chr6LG2	33201246			H	H	H	Y	G	Y	H	Y	Y	H	H	Y	G	H	H	H	H	H	Y	H	H	H	G	H	G	H	Y	H	H	H	H	H	Y	H	Y	H	H	H	Y	Y
AX-183581889	II	30.66	Chr6	42094550	1.57e-26	chr6LG2	33241684			H	H	H	Y	G	Y	H	Y	Y	H	H	Y	G	H	H	H	H	H	Y	H	H	H	G	H	G	H	-	H	H	H	H	H	Y	H	Y	H	H	H	Y	Y
AX-183620673	II	30.66	Chr6	42590673	2.61e-29	chr6LG2	34035261			H	H	H	Y	G	Y	H	Y	Y	H	H	Y	G	H	H	H	H	H	Y	H	H	H	G	H	G	H	Y	H	H	H	H	H	Y	H	Y	H	H	H	Y	Y
AX-183883144	II	30.66	Chr6	42601928	2.61e-29	chr6LG2	34047001			H	-	H	Y	G	Y	H	Y	Y	H	H	Y	H	H	H	H	H	H	Y	H	H	H	G	H	G	H	H	H	H	H	H	H	Y	H	Y	H	H	H	Y	Y
AX-183880861	II	30.66	Chr6	42606585	5.65e-26	chr6LG2	34051651			H	G	H	Y	G	Y	H	Y	Y	H	H	Y	G	H	H	H	G	H	Y	H	H	H	G	H	G	H	Y	H	H	H	H	H	Y	H	Y	H	H	H	Y	Y
AX-183620667	II	30.66	Chr6	42655279	1.22e-27	chr6LG2	34076165			H	H	H	Y	G	Y	H	Y	Y	H	H	Y	G	H	H	H	H	H	Y	H	H	H	G	H	G	H	-	H	H	H	H	H	Y	H	Y	H	H	H	Y	Y
AX-183581890	II	30.66	Chr6	42767238	1.22e-27	chr6LG2	34167938			H	H	H	Y	G	Y	H	Y	Y	H	H	Y	G	H	H	H	H	H	Y	H	H	H	G	H	G	H	-	H	H	H	H	H	Y	H	Y	H	H	H	Y	Y
AX-183620670	II	30.78	Chr6	42640241	1.22e-27	chr6LG2	34067067			H	H	H	Y	G	Y	H	Y	Y	Y	H	Y	G	-	H	H	H	H	Y	H	-	-	G	H	G	H	Y	Y	H	-	H	H	Y	H	Y	Y	H	H	Y	Y
AX-183637183	II	30.78	Chr6	42961146	1.22e-27	scaffold05561	7385			H	H	H	Y	G	Y	H	Y	Y	H	H	Y	G	H	H	H	H	H	Y	H	H	H	G	H	G	H	Y	H	H	H	H	H	Y	H	Y	H	H	H	Y	Y
AX-183571925	II	30.78	Chr6	43171961	2.61e-29	chr6LG2	34624604			H	H	H	Y	G	Y	H	Y	Y	H	H	Y	G	H	H	H	H	H	Y	H	H	H	G	H	G	H	-	H	H	H	H	H	Y	H	Y	H	H	H	Y	Y
AX-183873388	II	30.78	Chr6	43172058	1.22e-27	chr6LG2	34624701			H	H	H	Y	G	Y	H	Y	Y	H	H	Y	G	H	H	H	H	H	Y	H	H	H	G	H	G	H	Y	H	H	H	H	H	Y	H	Y	H	H	H	Y	Y
AX-183868132	II	30.78	Chr6	43389010	2.61e-29	scaffold00502	59350			H	H	H	Y	H	Y	H	Y	Y	H	H	Y	G	H	H	H	H	H	Y	H	H	H	-	H	G	H	H	H	H	H	H	H	Y	H	Y	H	H	H	Y	Y
AX-183632702	II	30.78	Chr6	43389869	1.22e-27	scaffold00502	58502			H	H	H	Y	G	Y	H	Y	Y	H	H	Y	G	H	H	H	H	H	Y	H	H	H	G	H	G	H	Y	H	H	H	H	H	Y	H	Y	H	H	H	Y	Y
AX-183882717	II	30.91	Chr6	43440197	5.65e-26	scaffold00502	20474			H	H	H	Y	G	Y	H	Y	Y	H	H	Y	G	H	H	H	H	H	Y	H	H	H	G	H	G	H	Y	H	H	H	H	H	H	H	Y	H	H	H	Y	Y
AX-183632701	II	30.91	Chr6	43442945	5.65e-26	scaffold00502	17833			H	H	H	Y	G	Y	H	Y	Y	H	H	Y	G	H	-	H	H	H	Y	H	H	H	H	H	-	H	H	H	H	H	H	H	H	H	Y	H	H	Y	Y	Y
AX-183626319	II	30.91	Chr6	43636971	2.63e-24	chr6LG2	31356729			H	H	H	Y	G	Y	H	Y	Y	H	H	Y	G	H	H	H	H	H	Y	H	H	H	G	H	G	H	-	H	H	H	H	H	-	H	Y	H	H	H	Y	Y
AX-183626317	II	30.91	Chr6	43640337	1.22e-27	chr6LG2	31345250			Y	-	H	Y	-	Y	H	-	Y	-	H	Y	G	G	H	H	-	G	Y	H	H	H	G	H	G	H	Y	H	H	H	H	H	Y	H	Y	H	H	H	Y	Y
AX-183882099	II	30.91	Chr6	43640868	5.65e-26	chr6LG2	31344722			H	H	H	Y	G	Y	H	-	Y	H	H	Y	G	H	H	H	H	H	Y	H	H	H	G	H	G	H	H	H	H	H	H	H	-	H	Y	H	H	H	Y	Y
AX-183888394	II	30.91	Chr6	43641003	2.63e-24	chr6LG2	31344587			H	H	H	Y	G	Y	H	Y	Y	H	H	Y	G	H	H	H	H	H	Y	H	H	H	G	H	G	H	H	H	H	G	H	H	Y	H	Y	H	H	H	Y	Y
AX-183626314	II	31.16	Chr6	43643644	1.22e-27	chr6LG2	31341949			H	H	H	Y	H	Y	H	Y	Y	H	H	Y	H	H	H	H	H	H	H	H	H	H	G	H	G	H	H	H	H	H	H	H	H	H	Y	Y	H	H	Y	Y
AX-183626313	II	31.16	Chr6	43644882	5.65e-26	chr6LG2	31340712			H	H	H	Y	G	Y	H	Y	Y	H	H	Y	G	H	H	H	H	H	H	H	-	H	-	H	-	H	-	H	H	H	H	H	H	H	Y	H	H	H	Y	Y
AX-183888341	II	31.16	Chr6	43825356	1.22e-27	chr6LG2	35082111			H	H	H	Y	G	Y	H	Y	Y	H	H	Y	G	H	H	H	H	H	Y	H	H	H	G	H	G	H	Y	H	H	H	H	H	Y	H	Y	H	H	H	Y	Y
AX-183579336	II	31.16	Chr6	44044679	1.22e-27	chr6LG2	34334106			H	H	H	Y	G	Y	H	Y	Y	H	H	Y	G	H	H	H	H	H	Y	H	H	H	G	H	G	H	H	H	H	H	H	H	Y	H	Y	H	H	H	Y	Y
AX-183568461	II	31.4	Chr6	44117114	2.61e-29	chr6LG2	34421911			H	H	H	Y	G	Y	H	Y	Y	H	H	Y	G	H	H	H	H	H	Y	H	H	H	G	H	G	H	Y	H	H	H	H	H	Y	H	Y	H	H	H	Y	Y
AX-183620725	II	31.78	Chr6	44198209	2.61e-29	chr6LG2	34502279			H	H	H	Y	G	Y	H	-	Y	H	H	Y	G	H	H	H	H	H	Y	H	H	H	G	H	G	H	Y	H	H	H	H	H	Y	H	Y	H	H	H	Y	Y
AX-183620734	II	31.9	Chr6	44260168	1.22e-27	chr6LG2	34522249			H	H	H	Y	G	Y	H	Y	Y	H	H	Y	G	H	H	H	H	H	Y	H	H	H	G	H	G	H	Y	H	H	H	H	H	Y	H	Y	H	H	H	Y	Y
AX-183568462	II	31.9	Chr6	44277328	1.22e-27	chr6LG2	34799609			H	H	H	Y	G	Y	H	Y	Y	H	H	Y	G	H	H	H	H	H	Y	H	H	H	G	H	G	H	H	H	H	H	H	H	Y	H	Y	H	H	H	Y	Y
AX-183891459	II	31.9	Chr6	44282250	2.61e-29	chr6LG2	34804349			H	H	H	Y	G	Y	H	Y	Y	H	H	Y	G	H	H	H	H	H	Y	H	H	H	G	H	G	H	Y	H	H	H	H	H	Y	H	Y	H	H	H	Y	Y
AX-183640426	II	31.9	Chr6	44365833	1.22e-27	chr6LG2	34852406			H	H	H	Y	G	Y	H	Y	Y	H	H	Y	G	H	H	H	H	H	Y	H	H	H	G	H	G	H	Y	H	H	H	H	H	Y	H	Y	H	H	H	Y	Y
AX-183979478	II	31.9	Chr6	44366209	2.61e-29	chr6LG2	34852782			H	H	H	Y	G	Y	H	Y	Y	H	H	Y	G	H	H	H	H	H	Y	H	H	H	G	H	G	H	Y	H	H	H	H	H	Y	H	Y	H	H	H	Y	Y
AX-183620742	II	31.9	Chr6	44373204	1.22e-27	chr6LG2	34860737			H	H	H	Y	G	Y	H	Y	Y	H	H	Y	G	H	H	H	H	H	Y	H	H	H	G	H	G	H	Y	H	H	H	H	H	Y	H	Y	H	H	H	Y	Y
AX-183873077	II	31.9	Chr6	44374143	1.22e-27	chr6LG2	34861670			H	H	H	Y	G	Y	H	Y	Y	H	H	Y	G	H	H	H	H	H	Y	H	H	H	G	H	G	H	Y	H	H	H	H	H	Y	H	Y	H	H	H	Y	Y
AX-183620743	II	31.9	Chr6	44374405	2.61e-29	chr6LG2	34861931			H	H	H	Y	G	Y	H	Y	Y	H	H	Y	H	H	H	H	H	H	Y	H	H	H	G	H	G	H	Y	H	H	H	H	H	Y	H	Y	H	H	H	Y	Y
AX-183620753	II	31.9	Chr6	44440836	2.61e-29	chr6LG2	34944304			H	H	H	Y	G	Y	H	Y	Y	H	H	Y	G	H	H	H	H	H	Y	H	H	H	G	H	G	H	H	H	H	H	H	H	Y	H	Y	H	H	H	Y	Y
AX-183620865	II	31.9	Chr6	44520805	2.61e-29	chr6LG2	35454517			H	H	H	Y	G	-	H	Y	Y	H	H	H	G	H	H	H	H	H	-	H	H	H	G	-	G	H	Y	H	H	H	H	H	Y	H	Y	H	H	H	Y	Y
AX-183883146	II	31.9	Chr6	44552668	2.61e-29	chr6LG2	35424518			H	H	H	-	G	Y	H	Y	Y	H	H	Y	-	H	H	H	H	H	Y	H	H	H	G	H	G	H	Y	H	Y	H	H	H	H	H	Y	H	H	H	Y	Y
AX-183886296	II	31.9	Chr6	44553691	2.61e-29	chr6LG2	35423495			H	H	H	Y	G	Y	H	Y	Y	H	H	Y	G	H	H	H	H	H	Y	H	H	H	G	H	G	H	-	H	H	H	H	H	Y	H	Y	H	H	H	Y	Y
AX-183894101	II	31.9	Chr6	44758695	2.61e-29	chr6LG2	35239917			H	H	H	Y	G	Y	H	Y	Y	H	H	Y	H	H	H	-	H	H	Y	H	H	H	G	H	G	H	-	H	H	H	H	H	Y	H	Y	H	H	H	-	Y
AX-183891461	II	31.9	Chr6	44882504	2.61e-29	chr6LG2	35139659			H	H	H	Y	G	-	H	-	Y	H	H	Y	G	H	H	H	H	H	-	H	H	H	G	H	G	H	Y	H	H	H	H	H	H	H	Y	H	H	H	-	Y
AX-183620851	II	31.9	Chr6	44885426	2.61e-29	chr6LG2	35136795			H	H	H	Y	G	Y	H	Y	Y	H	H	Y	G	H	H	H	H	H	Y	H	H	H	G	H	G	H	H	H	H	H	H	H	Y	H	Y	H	H	H	Y	Y
AX-183620847	II	31.9	Chr6	44886461	2.61e-29	chr6LG2	35135760			H	H	H	Y	G	Y	H	Y	Y	H	H	Y	G	H	H	H	H	H	Y	H	-	H	G	H	G	H	Y	H	H	H	H	H	Y	H	Y	H	H	H	Y	Y
AX-183574393	II	31.9	Chr6	44887443	2.61e-29	chr6LG2	35134778			H	H	H	Y	G	Y	H	Y	Y	H	H	Y	G	H	H	H	H	H	Y	H	-	H	G	H	G	H	Y	H	H	-	H	H	Y	H	Y	H	H	H	Y	Y
AX-183861097	II	31.9	Chr6	45065628	2.61e-29	chr6LG2	36226797			H	H	H	Y	G	Y	H	Y	Y	H	H	Y	G	H	H	H	H	H	Y	H	H	H	G	H	G	H	Y	H	H	H	H	H	Y	H	Y	H	H	H	Y	Y
AX-183640435	II	31.9	Chr6	45065983	2.61e-29	chr6LG2	36226442			H	H	H	Y	G	Y	H	Y	Y	H	H	Y	G	H	H	H	H	H	Y	H	H	H	G	H	G	H	Y	H	H	H	H	H	Y	H	Y	H	H	H	Y	Y
AX-183640434	II	31.9	Chr6	45066282	1.22e-27	chr6LG2	36226143			H	H	H	Y	G	Y	H	Y	Y	H	H	Y	G	H	H	H	H	H	Y	H	H	H	G	H	G	H	H	H	H	H	H	H	Y	H	Y	H	H	H	Y	Y
AX-183581893	II	31.9	Chr6	45090437	1.22e-27	chr6LG2	36199563			H	H	H	Y	G	Y	H	Y	Y	H	H	Y	G	H	H	H	H	H	Y	H	H	H	G	H	G	H	-	H	H	H	H	H	-	H	Y	H	H	H	Y	Y
AX-183860865	II	31.9	Chr6	45092100	2.61e-29	chr6LG2	36197900			H	H	H	Y	G	Y	H	Y	Y	H	H	Y	G	H	H	H	H	H	Y	H	H	H	G	H	G	H	H	H	H	H	H	H	Y	H	Y	H	H	H	Y	Y
AX-183620813	II	31.9	Chr6	45092979	2.61e-29	chr6LG2	36197021			H	H	H	Y	G	Y	H	Y	Y	H	H	Y	G	H	H	H	H	H	Y	H	H	H	G	H	G	H	-	H	H	H	H	H	Y	H	Y	H	H	H	Y	Y
AX-183620812	II	31.9	Chr6	45093139	1.22e-27	chr6LG2	36196861			H	H	H	Y	G	Y	H	Y	Y	H	H	Y	G	H	H	H	H	H	Y	H	H	H	-	H	G	H	-	H	H	H	H	H	Y	H	Y	H	H	H	Y	Y
AX-183581013	II	32.27	Chr6	45749805	2.61e-29	scaffold03542	100844			H	H	H	Y	G	Y	H	-	Y	H	H	Y	G	H	H	H	H	H	Y	H	H	H	G	H	G	H	-	H	H	H	H	H	-	H	H	H	H	H	Y	Y
AX-183568467	II	32.27	Chr6	45784962	1.22e-27	chr6LG2	36796907			H	H	H	Y	G	Y	H	Y	Y	H	H	Y	G	H	H	H	H	H	Y	H	H	H	G	H	G	H	-	H	H	H	H	H	Y	H	H	H	H	H	Y	Y
AX-183568468	II	32.27	Chr6	45810060	2.61e-29	chr6LG2	36821961			H	H	H	Y	G	Y	H	Y	Y	H	H	Y	G	H	H	H	H	H	Y	H	H	H	G	H	G	H	Y	H	H	H	H	H	Y	H	H	H	H	H	Y	Y
AX-183863387	II	32.65	Chr6	45967773	1.22e-27	chr6LG2	36991889			H	H	H	Y	G	Y	H	-	Y	H	H	Y	-	H	H	H	H	H	Y	H	H	H	G	H	G	H	-	H	H	H	H	H	-	H	H	H	H	H	Y	Y
AX-183581896	II	32.65	Chr6	45969007	1.22e-27	chr6LG2	36993125			H	H	H	Y	G	Y	H	Y	Y	H	H	Y	G	H	H	H	H	H	Y	H	H	H	G	H	G	H	-	H	H	H	H	H	Y	H	H	H	H	H	Y	Y
AX-183620889	II	32.65	Chr6	45971310	1.22e-27	chr6LG2	36995432			H	-	H	Y	G	Y	H	H	Y	H	H	Y	H	H	H	H	H	H	H	H	H	H	G	H	G	H	-	H	H	H	H	H	Y	H	H	H	H	H	Y	Y
AX-183881431	II	32.65	Chr6	46044636	2.03e-25	chr6LG2	35578558			H	H	H	Y	G	Y	H	Y	Y	H	H	Y	G	H	H	H	H	H	Y	H	H	H	G	H	G	H	Y	H	H	H	H	H	Y	H	H	H	H	H	Y	Y
AX-183620911	II	32.65	Chr6	46048777	5.65e-26	chr6LG2	35582730			H	H	H	Y	G	Y	H	-	Y	H	H	Y	G	H	H	H	H	H	Y	H	H	H	G	H	G	H	H	H	H	H	-	H	Y	H	H	H	H	H	Y	Y
AX-183568472	II	32.65	Chr6	46136077	1.22e-27	chr6LG2	36477020			H	H	H	Y	G	Y	H	Y	Y	H	H	Y	G	H	H	H	H	H	Y	H	H	H	G	H	G	H	-	H	H	H	H	H	Y	H	H	H	H	H	Y	Y
AX-183620902	II	32.65	Chr6	46136676	1.22e-27	chr6LG2	36476421			H	H	H	Y	G	Y	H	Y	Y	H	H	Y	G	H	H	H	H	H	Y	H	H	H	G	H	G	H	-	H	H	H	H	H	Y	H	H	H	H	H	Y	Y
AX-183866699	II	32.65	Chr6	46136844	2.61e-29	chr6LG2	36476253			H	-	H	Y	G	Y	H	H	Y	H	H	Y	G	H	H	H	H	H	Y	H	H	H	G	H	G	H	H	H	H	H	G	H	Y	H	H	H	H	H	Y	Y
AX-183568471	II	32.77	Chr6	46161897	1.22e-27	chr6LG2	36439513			H	H	H	Y	G	Y	H	-	Y	H	H	Y	G	H	H	H	H	H	Y	H	H	H	G	H	G	H	Y	H	H	H	H	H	Y	H	H	H	H	H	Y	Y
AX-183571932	II	32.77	Chr6	46365858	2.61e-29	chr6LG2	37239938			H	H	H	Y	G	Y	H	H	Y	H	H	Y	G	H	H	H	H	H	Y	H	H	H	G	H	G	H	Y	H	H	H	H	H	-	H	H	H	H	H	Y	Y
AX-183886828	II	32.89	Chr6	46368706	2.61e-29	chr6LG2	37242785			H	H	H	Y	G	Y	H	Y	Y	H	H	Y	G	H	H	H	H	H	Y	H	H	H	G	H	G	H	Y	H	H	H	H	H	Y	H	H	H	H	H	Y	Y
AX-183620946	II	32.89	Chr6	46370840	2.61e-29	chr6LG2	37244918			H	H	H	Y	G	Y	H	Y	Y	H	H	Y	G	H	H	H	H	H	Y	H	H	H	G	H	G	H	H	H	H	H	H	H	Y	H	H	H	H	H	Y	Y
AX-183579348	II	33.02	Chr6	46506849	1.22e-27	chr6LG2	37305964			H	H	H	Y	G	Y	H	Y	Y	H	H	Y	G	H	H	H	H	H	Y	H	H	H	G	H	G	H	-	H	H	H	H	H	-	H	H	H	H	H	Y	Y
AX-183568474	II	33.02	Chr6	46569443	1.22e-27	chr6LG2	37374051			H	H	H	Y	G	Y	H	Y	Y	H	H	Y	G	H	H	H	H	H	Y	H	H	H	G	H	G	H	H	H	H	H	H	H	-	H	H	H	H	H	Y	Y
AX-183887425	II	33.51	Chr6	47013201	1.22e-27	scaffold03407	99712			H	-	H	Y	G	Y	H	Y	Y	H	H	Y	G	H	H	H	H	H	Y	H	H	H	G	G	-	H	H	H	H	H	H	H	Y	H	H	H	H	-	Y	Y
AX-183626289	II	33.51	Chr6	47099052	2.61e-29	scaffold03407	26281			H	H	H	Y	G	Y	H	Y	Y	H	H	Y	G	H	H	H	H	H	Y	H	H	H	G	H	G	H	-	H	H	H	H	H	Y	H	H	H	H	H	Y	Y
AX-183620952	II	33.64	Chr6	47110447	1.22e-27	chr6LG2	37833210			H	H	H	Y	G	Y	H	Y	Y	H	H	Y	G	H	H	H	H	H	Y	H	H	H	G	H	G	H	H	H	H	H	H	H	Y	H	H	H	H	H	Y	Y
AX-183887855	II	33.89	Chr6	47114344	1.22e-27	chr6LG2	37851935			H	H	H	Y	G	Y	H	Y	Y	H	Y	Y	G	H	H	H	H	H	Y	H	H	H	G	H	G	H	H	H	H	H	H	H	H	H	H	H	H	H	Y	Y
AX-183866086	II	33.89	Chr6	47130354	2.61e-29	chr6LG2	37876430			H	H	H	Y	G	Y	H	Y	Y	H	Y	Y	G	H	H	H	H	H	Y	H	H	H	G	H	G	H	Y	H	H	H	H	H	Y	H	H	H	H	H	Y	Y
[truncated: 9,833 more rows]
[truncated: 365 more columns]

## Sheet: Table S18
Supplementary table 18. List of the 11,734 genetic markers developed in this study, and the distribution of these markers on the pea linkage map and their physical positions on the ZW6 reference genome.
[truncated: 11,735 more rows]

[truncated: 16 more sheets: Table S19, Table S20 Gp RIL population, Table 21 Gp fine-mapping, Table S22, Pp & Vv, Table S23, gene candidates, Table S24, Fafa, Table S25, Fa fine-mapping, Table S26, Fa interval genes, Table S27, Table S28, Table S29, Pea cloned genes, Table S30, D, Table S31, Os1, Table S32, Table S33, Table S34]
