# Supplementary material for: Genomic and Genetic Insights into Mendel’s Pea Genes
Source: Research Square preprint supplement (doi:10.21203/rs.3.rs-4509291/v1), 2024-06-12
Supplement: Supplementary file 2 [file b71072c7d2c815929954a2ff.xlsx]

## Sheet: Table S1
Supplementary Table 1. The pea germplasm panel that was analysed in this study. In total, 697 pea accessions assembled from John Innes Center (JI Pisum Germplasm Collection) were sequenced in this study, a China-UK collaboration named 'Mendel Pea G2P' project. JIC and AGIS accessions codes are the unique germplasm identifiers in the UK and China, respectively. Accession name (SeedStor) is a human…
AGIS_CAAS Code	JIC Genebank Store Code	Accession name (SeedStor)	Synonyms note	Population Subspecies	Description of biological status	Group	Background	Multiple instances of background	Reason to be chosen	Mutant/ genetic stock	LINE	Progenitor	ALLELE	LTYPE	Mut_Agent	Notes	ACC Year	ACC Origin	Ex-Origin and agro-bio-origin	Collection site Latitude	Collection site Longitude	Accession URL
SZPA0001	JI0002	P. abyssinicum	WBH 2039 [203]	P. abyssinicum	P. abyssinicum	G8				No						Known downy mildew resistant line. Parent ao a RIL population (with cv Kite) known downy mildew resistant line	1964	United Kingdom	Ethiopia	12.46	39.31	https://www.seedstor.ac.uk/search-infoaccession.php?idPlant=23403
SZPA0002	JI2202	P. abyssinicum		P. abyssinicum	P. abyssinicum	G8				No						The accession JI2202 has been sequenced at JIC and was also sequenced by Kreplak et al and is available from https://www.ncbi.nlm.nih.gov/sra/SRX1556862[accn]. JI2202 is the parent of a RIL population at JIC (JI2822xJI2202) and so of particular interest	1986	Russia	Yemen			https://www.seedstor.ac.uk/search-infoaccession.php?idPlant=25591
SZPA0003	JI2385	Pisum Sp.-Yemen		P. abyssinicum	P. abyssinicum	G8				No						JI2385 (P.abyssinicum from Yemen) is of interest because of its origin and its divergence from the rest of P.abyssinicum.	1988	Sweden	Yemen			https://www.seedstor.ac.uk/search-infoaccession.php?idPlant=25774
SZPE0001	JI0064	P. elatius		P. elatius	P. elatius	G8			Core hunter II selection	yes	WL 1293		Dpo	Type		JI 64 has purple spotted pod (rup or rups)	1965	Sweden	Israel	32.4	35.3	https://www.seedstor.ac.uk/search-infoaccession.php?idPlant=23464
SZPE0002	JI0198	P. elatius	PI 560055	P. elatius	P. elatius					No						known downy mildew resistant line	1962	Russia	Israel	31.0461	34.8516	https://www.seedstor.ac.uk/search-infoaccession.php?idPlant=23598
SZPE0003	JI0199	P. elatius		P. elatius	P. elatius				Core hunter II selection	No							1962	Russia	Israel	31.0461	34.8516	https://www.seedstor.ac.uk/search-infoaccession.php?idPlant=23599
SZPE0004	JI0255	P. elatius		P. elatius	P. elatius	G8			Core hunter II selection	No							1965	Israel	Israel	33.081	35.22	https://www.seedstor.ac.uk/search-infoaccession.php?idPlant=23655
SZPE0005	JI0261	P. elatius	WBH 2038 [203]	P. elatius	P. elatius	G8			Core hunter II selection	No							1968	Turkey	Turkey	36.07	33.17	https://www.seedstor.ac.uk/search-infoaccession.php?idPlant=23661
SZPE0006	JI0262	P. elatius		P. elatius	P. elatius	G8				No						Already has sequence data at JIC.	1968	Turkey	Turkey	36.51	31.15	https://www.seedstor.ac.uk/search-infoaccession.php?idPlant=23662
SZPE0007	JI0714	P. elatius		P. elatius	P. elatius	G8				No							1961	Germany				https://www.seedstor.ac.uk/search-infoaccession.php?idPlant=24114
SZPE0008	JI0800	P. elatius		P. elatius	P. elatius	G4				yes	WL 226		d	Type		known downy mildew resistant line	1970	Sweden				https://www.seedstor.ac.uk/search-infoaccession.php?idPlant=24200
SZPE0009	JI0950	P. elatius		P. elatius	P. elatius					No							1973	Canada	Turkey	40.4	28.15	https://www.seedstor.ac.uk/search-infoaccession.php?idPlant=24347
SZPE0010	JI1074	P. elatius	22716	P. elatius	P. elatius	G8			Core hunter II selection	No							1971	United States	Turkey	37.1	43.58	https://www.seedstor.ac.uk/search-infoaccession.php?idPlant=24471
SZPE0011	JI1075	P. elatius	22725	P. elatius	P. elatius					No							1971	United States	Turkey	38.06	28.1	https://www.seedstor.ac.uk/search-infoaccession.php?idPlant=24472
SZPE0012	JI1087	P. elatius	22647	P. elatius	P. elatius	G7				No							1971	United States	Turkey	36.12	29.38	https://www.seedstor.ac.uk/search-infoaccession.php?idPlant=24484
SZPE0013	JI1088	P. elatius	22652	P. elatius	P. elatius	G7			Core hunter II selection	No							1971	United States	Turkey	36.14	29.59	https://www.seedstor.ac.uk/search-infoaccession.php?idPlant=24485
SZPE0014	JI1089	P. elatius	22670	P. elatius	P. elatius	G6				yes	PI 343998		Rmp2	Type			1971	United States	Turkey	36.32	36.19	https://www.seedstor.ac.uk/search-infoaccession.php?idPlant=24486
SZPE0015	JI1091	P. elatius	22611	P. elatius	P. elatius	G8				No							1971	United States	Greece	40.15	24.2	https://www.seedstor.ac.uk/search-infoaccession.php?idPlant=24488
SZPE0016	JI1092	P. elatius	22618	P. elatius	P. elatius	G8				No							1971	United States	Greece	40.1	24.2	https://www.seedstor.ac.uk/search-infoaccession.php?idPlant=24489
SZPE0017	JI1093	P. elatius	22732	P. elatius	P. elatius	G8			Core hunter II selection	No							1971	United States	Greece	40.15	24.2	https://www.seedstor.ac.uk/search-infoaccession.php?idPlant=24490
SZPE0018	JI1094	P. elatius		P. elatius	P. elatius	G8				No							1971	United States	Greece	40.15	24.2	https://www.seedstor.ac.uk/search-infoaccession.php?idPlant=24491
SZPE0019	JI1095	P. elatius		P. elatius	P. elatius	G8			Core hunter II selection	No							1971	United States	Greece	40.1	24.2	https://www.seedstor.ac.uk/search-infoaccession.php?idPlant=24492
SZPE0020	JI1096	P. elatius		P. elatius	P. elatius	G8			Core hunter II selection	No							1971	United States	Greece	40.15	24.2	https://www.seedstor.ac.uk/search-infoaccession.php?idPlant=24493
SZPE0021	JI1703	P. elatius	1763 [2655]	P. elatius	P. elatius	G4				No						There is already sequence from this line in the data associated with Kreplak et al 2019 (https://www.ncbi.nlm.nih.gov/sra/SRX1556859[accn])	1982	United Kingdom				https://www.seedstor.ac.uk/search-infoaccession.php?idPlant=25097
SZPE0022	JI1795	P. elatius		P. elatius	P. elatius	G8				No							1983	Israel	Israel	31.46	35.1	https://www.seedstor.ac.uk/search-infoaccession.php?idPlant=25188
SZPE0023	JI2055	P. elatius		P. elatius	P. elatius	G8				No							1984	United Kingdom	Italy	40.33	15.18	https://www.seedstor.ac.uk/search-infoaccession.php?idPlant=25444
SZPE0024	JI2074	P. elatius		P. elatius	P. elatius					No							1962	Russia	Israel			https://www.seedstor.ac.uk/search-infoaccession.php?idPlant=25463
SZPE0025	JI2115	P. elatius		P. elatius	P. elatius	G2				No							1985	Germany	Spain	40.21	-5.5	https://www.seedstor.ac.uk/search-infoaccession.php?idPlant=25504
SZPE0026	JI2201	P. elatius		P. elatius	P. elatius				Core hunter II selection	No							1986	Russia	Russia	45.01	38.58	https://www.seedstor.ac.uk/search-infoaccession.php?idPlant=25590
SZPE0027	JI2538	P. elatius		P. elatius	P. elatius					No							1991	United Kingdom	Syria	33.49	36.09	https://www.seedstor.ac.uk/search-infoaccession.php?idPlant=25926
SZPE0028	JI2629	P. elatius		P. elatius	P. elatius					No							1992	Sweden	Ukraine	44.25	34	https://www.seedstor.ac.uk/search-infoaccession.php?idPlant=26017
SZPE0029	JI2695	P. elatius		P. elatius	P. elatius	G3				yes	WL 85		Obs	Type			1994	Sweden				https://www.seedstor.ac.uk/search-infoaccession.php?idPlant=26082
SZPE0030	JI2724	P. elatius		P. elatius	P. elatius	G8				No							1994	Spain	Spain	39.53	4.15	https://www.seedstor.ac.uk/search-infoaccession.php?idPlant=26111
SZPE0031	JI3147	P. elatius		P. elatius	P. elatius	G8				No							1991	United Kingdom	Turkey			https://www.seedstor.ac.uk/search-infoaccession.php?idPlant=26534
SZPE0032	JI3148	P. elatius		P. elatius	P. elatius	G7				No							1991	United Kingdom	Turkey			https://www.seedstor.ac.uk/search-infoaccession.php?idPlant=26535
SZPE0033	JI3149	P. elatius		P. elatius	P. elatius	G8				No							1991	United Kingdom	Turkey			https://www.seedstor.ac.uk/search-infoaccession.php?idPlant=26536
SZPE0034	JI3150	P. elatius		P. elatius	P. elatius	G7			Core hunter II selection	No							1991	United Kingdom	Turkey			https://www.seedstor.ac.uk/search-infoaccession.php?idPlant=26537
SZPE0035	JI3151	P. elatius		P. elatius	P. elatius	G7				No							1991	United Kingdom	Turkey			https://www.seedstor.ac.uk/search-infoaccession.php?idPlant=26538
SZPE0036	JI3153	P. elatius		P. elatius	P. elatius	G7			Core hunter II selection	No							1991	United Kingdom	Turkey			https://www.seedstor.ac.uk/search-infoaccession.php?idPlant=26540
SZPE0037	JI3155	P. elatius		P. elatius	P. elatius	G8				No							1991	United Kingdom	Turkey			https://www.seedstor.ac.uk/search-infoaccession.php?idPlant=26542
SZPE0038	JI3156	P. elatius		P. elatius	P. elatius				Core hunter II selection	No							1991	United Kingdom	Turkey			https://www.seedstor.ac.uk/search-infoaccession.php?idPlant=26543
SZPE0039	JI3157	P. elatius		P. elatius	P. elatius					No							1991	United Kingdom	Turkey			https://www.seedstor.ac.uk/search-infoaccession.php?idPlant=26544
SZPE0040	JI3158	P. elatius		P. elatius	P. elatius				Core hunter II selection	No							1991	United Kingdom	Turkey			https://www.seedstor.ac.uk/search-infoaccession.php?idPlant=26545
SZPE0041	JI3159	P. elatius		P. elatius	P. elatius					No							1991	United Kingdom	Turkey			https://www.seedstor.ac.uk/search-infoaccession.php?idPlant=26546
SZPE0042	JI3162	P. elatius		P. elatius	P. elatius					No							2002	Russia	Georgia			https://www.seedstor.ac.uk/search-infoaccession.php?idPlant=26549
SZPE0043	JI3163	P. elatius		P. elatius	P. elatius				Core hunter II selection	No							2002	Russia	Latvia			https://www.seedstor.ac.uk/search-infoaccession.php?idPlant=26550
SZPE0044	JI3263	P. elatius	722, L 105	P. elatius	P. elatius	G8				No							2005	United States	Israel	33.081	35.22	https://www.seedstor.ac.uk/search-infoaccession.php?idPlant=26650
SZPE0045	JI3271	P. elatius	723, L 106	P. elatius	P. elatius					No							2005	United States	Italy	39.267	9.111	https://www.seedstor.ac.uk/search-infoaccession.php?idPlant=26658
SZPE0046	JI3273	P. Sativum Var. Pumilio	712, L 100	P. elatius	P. elatius	G8				No							2005	United States	Israel			https://www.seedstor.ac.uk/search-infoaccession.php?idPlant=26660
SZPE0047	JI3274	P. Sativum Var. Pumilio	713, L 101	P. elatius	P. elatius	G8				No							2005	United States	Israel			https://www.seedstor.ac.uk/search-infoaccession.php?idPlant=26661
SZPE0048	JI3275	P. Sativum Var. Pumilio	714, L 102	P. elatius	P. elatius	G8				No							2005	United States	Israel			https://www.seedstor.ac.uk/search-infoaccession.php?idPlant=26662
SZPE0049	JI3276	P. Sativum Var. Pumilio	716, L 103	P. elatius	P. elatius					No							2005	United States	Israel	33.1253	36.28	https://www.seedstor.ac.uk/search-infoaccession.php?idPlant=26663
SZPE0050	JI3511	P. Sativum Ssp Elatius		P. elatius	P. elatius	G7				No							2008	United Kingdom	Georgia	41.9043	44.0955	https://www.seedstor.ac.uk/search-infoaccession.php?idPlant=26898
SZPE0051	JI3553	P. elatius		P. elatius	P. elatius	G8				No							2009	Russia	France	42.3839	5.8567	https://www.seedstor.ac.uk/search-infoaccession.php?idPlant=26940
SZPE0052	JI3557	P. elatius		P. elatius	P. elatius	G8				No							2010	Russia	Portugal	41.502	6.521	https://www.seedstor.ac.uk/search-infoaccession.php?idPlant=26944
SZPE0053	JI3558	P. elatius		P. elatius	P. elatius	G8				No							2010	Russia	Spain			https://www.seedstor.ac.uk/search-infoaccession.php?idPlant=26945
SZPE0054	JI0241	P. humile		P. humile	other wild	G6				No						Known downy mildew sensitive line.	1962	Israel	Israel	31.46	35.1	https://www.seedstor.ac.uk/search-infoaccession.php?idPlant=23641
SZPE0055	JI1794	P. humile		P. humile	other wild					yes	WL 1293		Dpo2-1	Type			1983	Israel	Israel	32.41	35.35	https://www.seedstor.ac.uk/search-infoaccession.php?idPlant=25187
SZPE0056	JI1854	P. Humile	Aa134	P. humile	other wild	G6				No							1983	New Zealand	Israel			https://www.seedstor.ac.uk/search-infoaccession.php?idPlant=25247
SZPE0057	JI2698	P. Humile		P. humile	other wild					No							1994	Sweden				https://www.seedstor.ac.uk/search-infoaccession.php?idPlant=26085
SZPE0058	JI0249	P. elatius	PI 560057	P. sativum	other wild	G8			Core hunter II selection	No							1962	Portugal				https://www.seedstor.ac.uk/search-infoaccession.php?idPlant=23649
SZPE0059	JI1707	P. elatius X 1/3870	1767 [2655]	P. sativum	other				PCGIN/ modern	No						Additional known downy mildew resistant line	1982	United Kingdom				https://www.seedstor.ac.uk/search-infoaccession.php?idPlant=25101
SZPF0001	JI0224	P. fulvum	PI 560061, WBH 2029 [203]	P. fulvum	P. fulvum	G8				No							1962	Israel	Israel	31.46	35.1	https://www.seedstor.ac.uk/search-infoaccession.php?idPlant=23624
SZPF0002	JI1006	P. fulvum	WBH 2142 [203]	P. fulvum	P. fulvum	G8				No						Taxonomic representation based on Vershinin et al., 2003 and Hradilová et al., 2019	1976	Netherlands	Israel			https://www.seedstor.ac.uk/search-infoaccession.php?idPlant=24403
SZPF0003	JI1010	P. fulvum	WBH 2144 [203]	P. fulvum	P. fulvum	G8				No						Taxonomic representation based on Vershinin et al., 2003 and Hradilová et al., 2019	1976	Netherlands	Israel	31.36	34.54	https://www.seedstor.ac.uk/search-infoaccession.php?idPlant=24407
SZPF0004	JI1796	P. fulvum		P. fulvum	P. fulvum	G8				No						Taxonomic representation based on Vershinin et al., 2003 and Hradilová et al., 2019	1983	Israel	Israel	31.46	35.1	https://www.seedstor.ac.uk/search-infoaccession.php?idPlant=25189
SZPF0005	JI2206	P. fulvum		P. fulvum	P. fulvum	G8				No						Taxonomic representation based on Vershinin et al., 2003 and Hradilová et al., 2019	1986	Russia	Israel			https://www.seedstor.ac.uk/search-infoaccession.php?idPlant=25595
SZPF0006	JI2473	P. fulvum	WBH 2031	P. fulvum	P. fulvum	G8				No							1990	Poland				https://www.seedstor.ac.uk/search-infoaccession.php?idPlant=25861
SZPF0007	JI2517	P. fulvum		P. fulvum	P. fulvum	G8				No							1991	United Kingdom	Syria	36.15	36.36	https://www.seedstor.ac.uk/search-infoaccession.php?idPlant=25905
SZPF0008	JI2519	P. fulvum		P. fulvum	P. fulvum	G8				No							1991	United Kingdom	Syria	36.08	36.34	https://www.seedstor.ac.uk/search-infoaccession.php?idPlant=25907
SZPF0009	JI2523	P. fulvum		P. fulvum	P. fulvum	G8				No							1991	United Kingdom	Syria	35.57	36.28	https://www.seedstor.ac.uk/search-infoaccession.php?idPlant=25911
SZPF0010	JI2530	P. fulvum		P. fulvum	P. fulvum	G8				No							1991	United Kingdom	Syria	34.4	36.07	https://www.seedstor.ac.uk/search-infoaccession.php?idPlant=25918
SZPF0011	JI2544	P. fulvum		P. fulvum	P. fulvum	G8				No							1991	United Kingdom	Syria	35.57	36.28	https://www.seedstor.ac.uk/search-infoaccession.php?idPlant=25932
SZPS0001	JI3638	Baryton		P. sativum	cultivar					No						cv Baryton (PCGIN line of interest)	2023	Germany				https://www.seedstor.ac.uk/search-infoaccession.php?idPlant=61735
SZPS0002	JI3635	FN1453		P. sativum	other	G4	JI2822	JI2436		No						FN1453/1 sil - like (check with Mike re allelism tests)	2023	United Kingdom				https://www.seedstor.ac.uk/search-infoaccession.php?idPlant=61732
SZPS0003	JI3636	FN2026_7		P. sativum	other	G4	JI2822	JI2436		No						FN2026/7 coch2 candidate	2023	United Kingdom				https://www.seedstor.ac.uk/search-infoaccession.php?idPlant=61733
SZPS0004	JI3637	FN2076_5		P. sativum	other	G4	JI2822	JI2436		No						FN2076/5 VicA null	2023	United Kingdom				https://www.seedstor.ac.uk/search-infoaccession.php?idPlant=61734
SZPS0005	JI0006	De Winton (Tall)		P. sativum	other	G4			Core hunter II selection	No							1961	Sweden				https://www.seedstor.ac.uk/search-infoaccession.php?idPlant=23406
SZPS0006	JI0007	De Haan 201.1 (Dwarf)	202.1	P. sativum	other	G4				No						known downy mildew resistant line	1961	Sweden				https://www.seedstor.ac.uk/search-infoaccession.php?idPlant=23407
SZPS0007	JI0012	Lamm 31	L 31	P. sativum	other				Core hunter II selection	No							1961	Sweden				https://www.seedstor.ac.uk/search-infoaccession.php?idPlant=23412
SZPS0008	JI0014	Caerulicans - ar		P. sativum	other	G4			Core hunter II selection	yes	WL 25		ar	Type		known downy mildew resistant line. JI0014 caerulicans ar flowers deep purple/blue.	1962	Sweden				https://www.seedstor.ac.uk/search-infoaccession.php?idPlant=23414
SZPS0009	JI0015	WBH 1458		P. sativum	other	G4	see JI2822	parent of JI2822	Core hunter II selection	yes	WL 1458		Cgf	Type		Already has sequence data at JIC gp line, known downy mildew resistant line. A parent of JI2822 (with JI399)	1962	Sweden				https://www.seedstor.ac.uk/search-infoaccession.php?idPlant=23415
SZPS0010	JI0018	WBH 21	29/311, Svalov 01001	P. sativum	other	G4			PCGIN/ modern	yes	WL 21		mp	Type		Additional known downy mildew resistant line	1963	Sweden				https://www.seedstor.ac.uk/search-infoaccession.php?idPlant=23418
SZPS0011	JI0019	WBH 826		P. sativum	other	G2			Core hunter II selection	No							1963	Sweden				https://www.seedstor.ac.uk/search-infoaccession.php?idPlant=23419
SZPS0012	JI0020	WBH 1089	49/130	P. sativum	other	G4			PCGIN/ modern	No						Additional known downy mildew resistant line	1963	Sweden				https://www.seedstor.ac.uk/search-infoaccession.php?idPlant=23420
SZPS0013	JI0021	Bleekbloier	BLEEKBLOIER	P. sativum	cultivar	G4			PCGIN/ modern	No						Additional known downy mildew resistant line	1963	Sweden				https://www.seedstor.ac.uk/search-infoaccession.php?idPlant=23421
SZPS0014	JI0022	Fruhe Gelbe Thyringer	K. 956	P. sativum	cultivar	G4			PCGIN/ modern	No						Additional known downy mildew resistant line	1963	Sweden				https://www.seedstor.ac.uk/search-infoaccession.php?idPlant=23422
SZPS0015	JI0024	WBH 1510		P. sativum	other	G3			PCGIN/ modern	No						Additional known downy mildew resistant line	1963	Sweden				https://www.seedstor.ac.uk/search-infoaccession.php?idPlant=23424
SZPS0016	JI0025	WBH 1511		P. sativum	other	G4			PCGIN/ modern	No						Additional known downy mildew resistant line	1963	Sweden				https://www.seedstor.ac.uk/search-infoaccession.php?idPlant=23425
SZPS0017	JI0026	Stipula Imminuata - stim	L 680	P. sativum	other	G2			PCGIN/ modern	yes	WL 152		ins	Rep	EI	Known downy mildew sensitive line. JI0026 brick red flower (rub)	1963	Sweden				https://www.seedstor.ac.uk/search-infoaccession.php?idPlant=23426
SZPS0018	JI0028	Field Pea - India		P. sativum	landrace	G2			Core hunter II selection	No							1961	India				https://www.seedstor.ac.uk/search-infoaccession.php?idPlant=23428
SZPS0019	JI0033	Crypto - Dwarf - le,la,cry&#047;c	L 1373/30, PI 275825	P. sativum	other	G5			Core hunter II selection	No							1964	Sweden				https://www.seedstor.ac.uk/search-infoaccession.php?idPlant=23433
SZPS0020	JI0034	Lamm 30	PI 275826, WBH 1363 [203]	P. sativum	other				Core hunter II selection	yes	WL 1363		rpv1 rpv2	Type			1964	Sweden				https://www.seedstor.ac.uk/search-infoaccession.php?idPlant=23434
SZPS0021	JI0035	Lamm 134		P. sativum	other	G5			Core hunter II selection	No							1964	Sweden				https://www.seedstor.ac.uk/search-infoaccession.php?idPlant=23435
SZPS0022	JI0037	Lamm 47	1043/37-4	P. sativum	other	G5			PCGIN/ modern	No						JI0037 similar in phenotype to JI0799. Both are example of yellow foliage and pods that turn yellow eventually. They both have very wide pods (lt) and thick pod walls (n)	1964	Sweden				https://www.seedstor.ac.uk/search-infoaccession.php?idPlant=23437
SZPS0023	JI0039	Lamm 101		P. sativum	other	G4			Core hunter II selection	No							1964	Sweden				https://www.seedstor.ac.uk/search-infoaccession.php?idPlant=23439
SZPS0024	JI0040	Lamm 141	L 22 [203]	P. sativum	other	G3			Core hunter II selection	No							1964	Sweden				https://www.seedstor.ac.uk/search-infoaccession.php?idPlant=23440
SZPS0025	JI0043	Slender - le,la,cry&#047;s		P. sativum	other	G5			Core hunter II selection	No							1964	Sweden				https://www.seedstor.ac.uk/search-infoaccession.php?idPlant=23443
SZPS0026	JI0044	WBH 974		P. sativum	other	G3			Core hunter II selection	No							1964	Sweden				https://www.seedstor.ac.uk/search-infoaccession.php?idPlant=23444
SZPS0027	JI0046	WBH 1221		P. sativum	other	G4			PCGIN/ modern	No						Additional known downy mildew resistant line	1964	Sweden				https://www.seedstor.ac.uk/search-infoaccession.php?idPlant=23446
SZPS0028	JI0047	WBH 1276		P. sativum	other				Core hunter II selection	No						Known downy mildew sensitive line	1964	Sweden				https://www.seedstor.ac.uk/search-infoaccession.php?idPlant=23447
SZPS0029	JI0048	WBH 1303		P. sativum	other	G4			PCGIN/ modern	No						Additional known downy mildew resistant line	1964	Sweden				https://www.seedstor.ac.uk/search-infoaccession.php?idPlant=23448
SZPS0030	JI0050	Hammarlunds K	84 [2654], K, L5057 [203]	P. sativum	other				Core hunter II selection	No							1964	Sweden				https://www.seedstor.ac.uk/search-infoaccession.php?idPlant=23450
SZPS0031	JI0055	WBH 1288		P. sativum	other	G3			Core hunter II selection	yes	WL 1288		fom	Type		Known downy mildew sensitive line	1965	Sweden				https://www.seedstor.ac.uk/search-infoaccession.php?idPlant=23455
SZPS0032	JI0057	Reductus - red		P. sativum	other	G5			Core hunter II selection	No						Known downy mildew sensitive line	1965	Sweden				https://www.seedstor.ac.uk/search-infoaccession.php?idPlant=23457
SZPS0033	JI0058	WBH 1073		P. sativum	other	G4			PCGIN/ modern	yes	WL 173		coe	Type		Additional known downy mildew resistant line	1965	Sweden				https://www.seedstor.ac.uk/search-infoaccession.php?idPlant=23458
SZPS0034	JI0060	WBH 577		P. sativum	other	G4			Core hunter II selection	yes	WL 577		Pu Pur	Type		JI60 same as WBH 577, has Pu or Pur - purple pods	1965	Sweden				https://www.seedstor.ac.uk/search-infoaccession.php?idPlant=23460
SZPS0035	JI0061	WBH 761		P. sativum	other	G5	JI61	JI61	Core hunter II selection	yes	WL 761		Pa vim	Type		p or v - uncharacterised Mendelian locus. Carries T3-5 (Extra Rapid), Known downy mildew sensitive line	1965	Sweden	Netherlands			https://www.seedstor.ac.uk/search-infoaccession.php?idPlant=23461
SZPS0036	JI0062	Aurea-au		P. sativum	other				PCGIN/ modern	yes	WL 862		au	Type		Additional known downy mildew resistant line	1965	Sweden				https://www.seedstor.ac.uk/search-infoaccession.php?idPlant=23462
SZPS0037	JI0066	English Sabel		P. sativum	cultivar	G2			Core hunter II selection	yes	WL 33		p v	Repr		p or v - uncharacterised Mendelian locus, Known downy mildew sensitive line	1966	Sweden				https://www.seedstor.ac.uk/search-infoaccession.php?idPlant=23466
SZPS0038	JI0067	Graue Posthornchen	L 58	P. sativum	cultivar	G2			PCGIN/ modern	yes	L 58		Arse	Type		Additional known downy mildew resistant line	1966	Sweden				https://www.seedstor.ac.uk/search-infoaccession.php?idPlant=23467
SZPS0039	JI0069	Sabel		P. sativum	cultivar	G2			Core hunter II selection	No							1966	Sweden				https://www.seedstor.ac.uk/search-infoaccession.php?idPlant=23469
SZPS0040	JI0071	Peluske		P. sativum	cultivar	G3			Core hunter II selection	No							1966	Sweden				https://www.seedstor.ac.uk/search-infoaccession.php?idPlant=23471
SZPS0041	JI0072	Chlorophyll-Chimeric		P. sativum	other	G5			Core hunter II selection	No						Known downy mildew sensitive line	1966	Sweden				https://www.seedstor.ac.uk/search-infoaccession.php?idPlant=23472
SZPS0042	JI0073	WBH 1238		P. sativum	other	G4			Core hunter II selection	yes	WL 1238		Bra	Type		gp line, Known downy mildew sensitive line line. JI73 multimarker line, yellow pods confirmed 2019/2020	1966	Sweden				https://www.seedstor.ac.uk/search-infoaccession.php?idPlant=23473
SZPS0043	JI0074	Alterno-Marmorata-Mex		P. sativum	other	G2			Core hunter II selection	yes	WL 1469		mex	Type		p or v - uncharacterised Mendelian locus, Known downy mildew sensitive line	1966	Sweden				https://www.seedstor.ac.uk/search-infoaccession.php?idPlant=23474
SZPS0044	JI0077	WBH 1472		P. sativum	other	G2			Core hunter II selection	No						p or v - uncharacterised Mendelian locus	1966	Sweden				https://www.seedstor.ac.uk/search-infoaccession.php?idPlant=23477
SZPS0045	JI0079	P.sativum-afghanistan	WP 525A	P. sativum	landrace				Core hunter II selection	yes	WL 1396		D<tet	Type		known downy mildew resistant line	1965	Sweden	Afghanistan			https://www.seedstor.ac.uk/search-infoaccession.php?idPlant=23479
SZPS0046	JI0080	P.sativum-afghanistan	WP 525B	P. sativum	landrace				Core hunter II selection	No							1965	Sweden	Afghanistan			https://www.seedstor.ac.uk/search-infoaccession.php?idPlant=23480
SZPS0047	JI0082	P.sativum-afghanistan	WP 525D	P. sativum	landrace	G6			Core hunter II selection	No							1965	Sweden	Afghanistan			https://www.seedstor.ac.uk/search-infoaccession.php?idPlant=23482
SZPS0048	JI0083	P.sativum-afghanistan	WP 525E	P. sativum	landrace				Core hunter II selection	No							1965	Sweden	Afghanistan			https://www.seedstor.ac.uk/search-infoaccession.php?idPlant=23483
SZPS0049	JI0084	P.sativum-afghanistan	WP 525F	P. sativum	landrace	G5			Core hunter II selection	No							1965	Sweden	Afghanistan			https://www.seedstor.ac.uk/search-infoaccession.php?idPlant=23484
SZPS0050	JI0085	P.sativum-afghanistan	WP 526	P. sativum	landrace	G6			Core hunter II selection	No						Already has sequence data at JIC	1965	Sweden	Afghanistan			https://www.seedstor.ac.uk/search-infoaccession.php?idPlant=23485
SZPS0051	JI0086	P.sativum-afghanistan	WP 527	P. sativum	landrace	G6			Core hunter II selection	yes	WL 143		pat	Type		Known downy mildew sensitive line. JI 86 has fuscopurpureus (cr) flowers	1965	Sweden	Afghanistan			https://www.seedstor.ac.uk/search-infoaccession.php?idPlant=23486
SZPS0052	JI0087	P.sativum-afghanistan	WP 530	P. sativum	landrace	G6			Core hunter II selection	No						Known downy mildew sensitive line	1965	Sweden	Afghanistan			https://www.seedstor.ac.uk/search-infoaccession.php?idPlant=23487
SZPS0053	JI0089	P.sativum-afghanistan	WP 538C	P. sativum	landrace				PCGIN/ modern	No						Additional known downy mildew resistant line	1965	Sweden	Afghanistan			https://www.seedstor.ac.uk/search-infoaccession.php?idPlant=23489
SZPS0054	JI0090	P.sativum-afghanistan	WP 538D	P. sativum	landrace	G5			Afghan line	No						known downy mildew resistant line	1965	Sweden	Afghanistan			https://www.seedstor.ac.uk/search-infoaccession.php?idPlant=23490
SZPS0055	JI0094	P.sativum-afghanistan	PI 125839	P. sativum	landrace	G6			Core hunter II selection	No							1965	Sweden	Afghanistan	36.53	71.348	https://www.seedstor.ac.uk/search-infoaccession.php?idPlant=23494
SZPS0056	JI0098	P.sativum-afghanistan	PI 207508	P. sativum	landrace	G6			Core hunter II selection	No							1965	Sweden	Afghanistan			https://www.seedstor.ac.uk/search-infoaccession.php?idPlant=23498
SZPS0057	JI0099	P.sativum-afghanistan	PI 212112	P. sativum	landrace	G6			Core hunter II selection	No						Known downy mildew sensitive line	1965	Sweden	Afghanistan			https://www.seedstor.ac.uk/search-infoaccession.php?idPlant=23499
SZPS0058	JI0102	P.sativum-afghanistan	PI 220189	P. sativum	landrace	G6			PCGIN/ modern	No						Additional known downy mildew resistant line	1965	Sweden	Afghanistan			https://www.seedstor.ac.uk/search-infoaccession.php?idPlant=23502
SZPS0059	JI0108	P.sativum-afghanistan	PI 223284	P. sativum	landrace	G6			Core hunter II selection	No							1965	Sweden	Afghanistan	36.392	67.172	https://www.seedstor.ac.uk/search-infoaccession.php?idPlant=23508
SZPS0060	JI0109	P.sativum-afghanistan	PI 223285	P. sativum	landrace	G6			Core hunter II selection	No							1965	Sweden	Afghanistan			https://www.seedstor.ac.uk/search-infoaccession.php?idPlant=23509
SZPS0061	JI0114	L 5618-af,tl		P. sativum	other	G5			PCGIN/ modern	No						Additional known downy mildew resistant line	1967	Russia				https://www.seedstor.ac.uk/search-infoaccession.php?idPlant=23514
SZPS0062	JI0116	Parvus		P. sativum	cultivar	G3	Parvus	Parvus	Core hunter II selection	yes	Parvus	-	Fil	Type	wild type		1967	Russia				https://www.seedstor.ac.uk/search-infoaccession.php?idPlant=23516
SZPS0063	JI0118	WBH 22	TENINS 26/73	P. sativum	other	G3			PCGIN/ modern	yes	WL 22		b	Type		Additional known downy mildew resistant line	1968	Sweden				https://www.seedstor.ac.uk/search-infoaccession.php?idPlant=23518
SZPS0064	JI0120	Sabel		P. sativum	cultivar	G4			Core hunter II selection	yes	WL 1		sal	Repr			1968	Sweden				https://www.seedstor.ac.uk/search-infoaccession.php?idPlant=23520
SZPS0065	JI0122	Olympia 1		P. sativum	cultivar	G5			Core hunter II selection	No							1968	Sweden				https://www.seedstor.ac.uk/search-infoaccession.php?idPlant=23522
SZPS0066	JI0123	P.striata	1224/33	P. sativum	other wild				PCGIN/ modern	yes	WL 234		U<st	Type		Additional known downy mildew resistant line	1968	Sweden				https://www.seedstor.ac.uk/search-infoaccession.php?idPlant=23523
SZPS0067	JI0124	Pinkish White - am1	Mansholt line	P. sativum	other	G4			PCGIN/ modern	yes	WL 369		am1	Type		Additional known downy mildew resistant line	1968	Sweden	Netherlands			https://www.seedstor.ac.uk/search-infoaccession.php?idPlant=23524
SZPS0068	JI0125	Griseostriata - gri	555/2	P. sativum	other	G3			Core hunter II selection	yes	WL 379		gri	Type		Known downy mildew sensitive line	1968	Sweden				https://www.seedstor.ac.uk/search-infoaccession.php?idPlant=23525
SZPS0069	JI0127	WBH 592		P. sativum	other	G5			PCGIN/ modern	yes	WL 592		cor	Type		Additional known downy mildew resistant line	1968	Sweden				https://www.seedstor.ac.uk/search-infoaccession.php?idPlant=23527
SZPS0070	JI0128	WBH 741		P. sativum	other	G4			PCGIN/ modern	No						Additional known downy mildew resistant line. JI0128 is the Genetical "Type line" for gp, should be included	1968	Sweden				https://www.seedstor.ac.uk/search-infoaccession.php?idPlant=23528
SZPS0071	JI0131	Procumbens - pro		P. sativum	other	G4			PCGIN/ modern	yes	WL 851		Aba<A			Additional known downy mildew resistant line	1968	Sweden				https://www.seedstor.ac.uk/search-infoaccession.php?idPlant=23531
SZPS0072	JI0132	WBH 1072		P. sativum	other	G4			Core hunter II selection	yes	WL 172		s	Repr		gp line JI132 yellow pods confirmed 2019/2020, also pale flowers	1968	Sweden				https://www.seedstor.ac.uk/search-infoaccession.php?idPlant=23532
SZPS0073	JI0133	Gray Radicula		P. sativum	cultivar	G3			PCGIN/ modern	yes	WL 124		rag	Type		Additional known downy mildew resistant line	1968	Sweden				https://www.seedstor.ac.uk/search-infoaccession.php?idPlant=23533
SZPS0074	JI0134	Navicula Apertus - nap		P. sativum	other	G4			Core hunter II selection	yes	WL 1255		Coe	Type		p or v - uncharacterised Mendelian locus, known downy mildew resistant line	1968	Sweden				https://www.seedstor.ac.uk/search-infoaccession.php?idPlant=23534
SZPS0075	JI0136	Infecunda - re	K.1247	P. sativum	other	G5			Core hunter II selection	yes	WL 1385		re	Rep		gp line JI 136 yellow pods confirmed 2019/2020, also looks like a Rogue	1968	Sweden				https://www.seedstor.ac.uk/search-infoaccession.php?idPlant=23536
SZPS0076	JI0138	Chlorotica-chi		P. sativum	other	G3			PCGIN/ modern	yes	WL 563		sg2	Type		Additional known downy mildew resistant line	1968	Sweden				https://www.seedstor.ac.uk/search-infoaccession.php?idPlant=23538
SZPS0077	JI0144	B768-50-2		P. sativum	other	G5			Core hunter II selection	No							1969	United States	Ethiopia			https://www.seedstor.ac.uk/search-infoaccession.php?idPlant=23544
SZPS0078	JI0145	Extra Rapid Nilsson		P. sativum	other	G5			PCGIN/ modern	No						JI0145 (parent of BC lines for R/r , cytogenetic stock = L83)	1961	Sweden				https://www.seedstor.ac.uk/search-infoaccession.php?idPlant=23545
SZPS0079	JI0146	Hammarlunds K Line	K, L 5057 [203], WBH 1476 [203]	P. sativum	other				PCGIN/ modern	No						JI0146 (cytogenetic stock = L84)	1961	Sweden				https://www.seedstor.ac.uk/search-infoaccession.php?idPlant=23546
SZPS0080	JI0147	Pellews Thibet-7	THIBET-7 [286], WBH 1477 [203]	P. sativum	other	G5			PCGIN/ modern	No						JI0147 (cytogenetic stock = L87)	1961	Sweden	Tibet China			https://www.seedstor.ac.uk/search-infoaccession.php?idPlant=23547
SZPS0081	JI0148	Nilssons N-2	L 5059 [203], N-2, WBH 1478 [203]	P. sativum	other	G2			PCGIN/ modern	No						JI0148 (cytogenetic stock = L108)	1961	Sweden				https://www.seedstor.ac.uk/search-infoaccession.php?idPlant=23548
SZPS0082	JI0149	Pellews Merton-1	MERTON 1 [286]	P. sativum	other				PCGIN/ modern	No						JI0149 (cytogenetic stock = L111)	1961	Sweden				https://www.seedstor.ac.uk/search-infoaccession.php?idPlant=23549
SZPS0083	JI0150	Winges	L 21 [203], WBH 1479 [203]	P. sativum	other				Core hunter II selection	No						Reportedly gp line (cytogentic stock = L112)but JI150 did not have yellow pods 2019/2020, suggested replacingwith type line for gp JI128 )	1961	Sweden				https://www.seedstor.ac.uk/search-infoaccession.php?idPlant=23550
SZPS0084	JI0151	Nilssons-N1	L 5062 [203], N 1, WBH 1480 [203]	P. sativum	other	G2			Core hunter II selection	No						cytogentic stock = L114	1961	Sweden				https://www.seedstor.ac.uk/search-infoaccession.php?idPlant=23551
SZPS0085	JI0152	Nilssons-N3	N 3	P. sativum	other				PCGIN/ modern	No						JI0152 (cytogenetic stock = L88)	1961	Sweden				https://www.seedstor.ac.uk/search-infoaccession.php?idPlant=23552
SZPS0086	JI0154	Control Dun Pea Aureool		P. sativum	other	G4			Core hunter II selection	No							1968	Netherlands				https://www.seedstor.ac.uk/search-infoaccession.php?idPlant=23554
SZPS0087	JI0157	P.sativum-sudan	WBH 2056 [203]	P. sativum	landrace	G7			PCGIN/ modern	No						Additional known downy mildew resistant line	1964	United Kingdom	Ethiopia	15.37	32.32	https://www.seedstor.ac.uk/search-infoaccession.php?idPlant=23557
SZPS0088	JI0162	P.sativum-Ethiopia		P. sativum	landrace	G2				No						Core hunter II choice of 500 ACC from the 2883 genotyped ACC	1964	United Kingdom	Ethiopia			https://www.seedstor.ac.uk/search-infoaccession.php?idPlant=23562
SZPS0089	JI0166	P.sativum-Ethiopia		P. sativum	landrace	G2			Core hunter II selection	No							1964	United Kingdom	Ethiopia	11.36	37.23	https://www.seedstor.ac.uk/search-infoaccession.php?idPlant=23566
SZPS0090	JI0167	P.sativum-Ethiopia		P. sativum	landrace	G2			Core hunter II selection	No							1964	United Kingdom	Ethiopia	11.36	37.23	https://www.seedstor.ac.uk/search-infoaccession.php?idPlant=23567
SZPS0091	JI0172	P.sativum-Ethiopia		P. sativum	landrace	G2			Core hunter II selection	No							1964	United Kingdom	Ethiopia	10.21	37.44	https://www.seedstor.ac.uk/search-infoaccession.php?idPlant=23572
SZPS0092	JI0174	P.sativum-Ethiopia		P. sativum	landrace	G2			Core hunter II selection	No							1964	United Kingdom	Ethiopia	10.21	37.44	https://www.seedstor.ac.uk/search-infoaccession.php?idPlant=23574
SZPS0093	JI0175	P.sativum-Ethiopia		P. sativum	landrace	G1			Core hunter II selection	No							1964	United Kingdom	Ethiopia			https://www.seedstor.ac.uk/search-infoaccession.php?idPlant=23575
SZPS0094	JI0176	P.sativum-Ethiopia		P. sativum	landrace	G1			Core hunter II selection	No							1964	United Kingdom	Ethiopia			https://www.seedstor.ac.uk/search-infoaccession.php?idPlant=23576
SZPS0095	JI0177	P.sativum-Ethiopia		P. sativum	landrace	G2			Core hunter II selection	No							1964	United Kingdom	Ethiopia			https://www.seedstor.ac.uk/search-infoaccession.php?idPlant=23577
SZPS0096	JI0180	P.sativum-Ethiopia		P. sativum	landrace	G2			Core hunter II selection	No							1964	United Kingdom	Ethiopia	8.45	38.59	https://www.seedstor.ac.uk/search-infoaccession.php?idPlant=23580
SZPS0097	JI0181	Keerau Pea	WBH 2033 [203]	P. sativum	landrace	G6			PCGIN/ modern	No						Additional known downy mildew resistant line	1961	Nepal	Nepal	27.55	83.27	https://www.seedstor.ac.uk/search-infoaccession.php?idPlant=23581
SZPS0098	JI0184	Khadraa		P. sativum	cultivar				Core hunter II selection	No							1962	Sudan	Sudan			https://www.seedstor.ac.uk/search-infoaccession.php?idPlant=23584
SZPS0099	JI0185	Wiraig	WBH 2058 [203]	P. sativum	landrace/other	G7				No						known downy mildew resistant line. Parent of a RIL population	1962	Sudan	Sudan			https://www.seedstor.ac.uk/search-infoaccession.php?idPlant=23585
SZPS0100	JI0188	Wiraig		P. sativum	landrace				Core hunter II selection	No							1962	Sudan	Sudan			https://www.seedstor.ac.uk/search-infoaccession.php?idPlant=23588
SZPS0101	JI0189	Wiraig		P. sativum	landrace	G7			Core hunter II selection	No							1962	Sudan	Sudan			https://www.seedstor.ac.uk/search-infoaccession.php?idPlant=23589
SZPS0102	JI0190	Wiraig		P. sativum	landrace	G7			Core hunter II selection	No							1962	Sudan	Sudan			https://www.seedstor.ac.uk/search-infoaccession.php?idPlant=23590
SZPS0103	JI0191	Wiraig		P. sativum	landrace				Core hunter II selection	No						known downy mildew resistant line	1962	Sudan	Sudan			https://www.seedstor.ac.uk/search-infoaccession.php?idPlant=23591
SZPS0104	JI0200	P. thebaicum		P. sativum	other wild	G3			PCGIN/ modern	No						Additional known downy mildew resistant line	1962	Italy				https://www.seedstor.ac.uk/search-infoaccession.php?idPlant=23600
SZPS0105	JI0205	P.sativum Ircutianum Gov.		P. sativum	landrace	G3			Core hunter II selection	No						JI 205 has fuscopurpureus (cr) flowers	1962	Russia	Russia	52.15	104.2	https://www.seedstor.ac.uk/search-infoaccession.php?idPlant=23605
SZPS0106	JI0208	Stamboryj-71		P. sativum	other				Core hunter II selection	No							1962	Russia	Russia	52.3	38.8	https://www.seedstor.ac.uk/search-infoaccession.php?idPlant=23608
SZPS0107	JI0209	P.sativum arvense		P. sativum	landrace				Core hunter II selection	No						known downy mildew resistant line	1962	India	India			https://www.seedstor.ac.uk/search-infoaccession.php?idPlant=23609
SZPS0108	JI0210	Lucknow Boniya	PI 240515	P. sativum	cultivar	G5			PCGIN/ modern	No			er1-3	Type		Additional known downy mildew resistant line	1962	India		26.51	80.55	https://www.seedstor.ac.uk/search-infoaccession.php?idPlant=23610
SZPS0109	JI0214	P.sativum arvense		P. sativum	landrace				Core hunter II selection	No						Known downy mildew sensitive line	1962	India				https://www.seedstor.ac.uk/search-infoaccession.php?idPlant=23614
SZPS0110	JI0216	Kanawari		P. sativum	cultivar	G2			PCGIN/ modern	No						Additional known downy mildew resistant line	1962	India				https://www.seedstor.ac.uk/search-infoaccession.php?idPlant=23616
SZPS0111	JI0220	Field Pea		P. sativum	landrace	G1			Core hunter II selection	No						known downy mildew resistant line	1962	India				https://www.seedstor.ac.uk/search-infoaccession.php?idPlant=23620
SZPS0112	JI0221	Field Pea-India		P. sativum	landrace	G1			PCGIN/ modern	No						Additional known downy mildew resistant line	1962	India	India			https://www.seedstor.ac.uk/search-infoaccession.php?idPlant=23621
SZPS0113	JI0222	Field Pea-India		P. sativum	landrace	G1			Core hunter II selection	No							1962	India	India			https://www.seedstor.ac.uk/search-infoaccession.php?idPlant=23622
SZPS0114	JI0223	Field Pea-India		P. sativum	landrace	G1			Core hunter II selection	No							1962	India	India			https://www.seedstor.ac.uk/search-infoaccession.php?idPlant=23623
SZPS0115	JI0228	P.sativum-bolivia		P. sativum	landrace	G2			PCGIN/ modern	No						Additional known downy mildew resistant line	1962	Bolivia	Bolivia	-17.38	-66.15	https://www.seedstor.ac.uk/search-infoaccession.php?idPlant=23628
SZPS0116	JI0233	Mukyira		P. sativum	cultivar	G2			Core hunter II selection	No							1962	Uganda	Uganda	0.16	31.37	https://www.seedstor.ac.uk/search-infoaccession.php?idPlant=23633
SZPS0117	JI0237	P.sativum-Ethiopia		P. sativum	landrace	G1			Core hunter II selection	No							1962	Ethiopia	Ethiopia	11.08	39.38	https://www.seedstor.ac.uk/search-infoaccession.php?idPlant=23637
SZPS0118	JI0240	P.sativum-Ethiopia		P. sativum	landrace	G2			Core hunter II selection	No							1962	Ethiopia	Ethiopia	9.02	38.42	https://www.seedstor.ac.uk/search-infoaccession.php?idPlant=23640
SZPS0119	JI0245	P.sativum-Russia		P. sativum	landrace				Core hunter II selection	No							1963	Russia	Russia	52.15	104.2	https://www.seedstor.ac.uk/search-infoaccession.php?idPlant=23645
SZPS0120	JI0246	P.sativum-Russia		P. sativum	landrace	G3			Core hunter II selection	No							1963	Russia	Russia	54.37	39.44	https://www.seedstor.ac.uk/search-infoaccession.php?idPlant=23646
SZPS0121	JI0247	Pyara Matar		P. sativum	cultivar				Core hunter II selection	No							1963	Russia	India			https://www.seedstor.ac.uk/search-infoaccession.php?idPlant=23647
SZPS0122	JI0250	P. jomardii	LP42, WBH 2055 [203]	P. sativum ssp jomardii	other wild	G7			PCGIN/ modern	No						Additional known downy mildew resistant line	1962	United Kingdom	Egypt			https://www.seedstor.ac.uk/search-infoaccession.php?idPlant=23650
SZPS0123	JI0251	P.sativum-Ethiopia		P. sativum	landrace	G6			PCGIN/ modern	No						Additional known downy mildew resistant line	1962	United Kingdom	Ethiopia			https://www.seedstor.ac.uk/search-infoaccession.php?idPlant=23651
SZPS0124	JI0252	P.sativum-Ethiopia		P. sativum	landrace	G6			Core hunter II selection	No							1962	United Kingdom	Ethiopia			https://www.seedstor.ac.uk/search-infoaccession.php?idPlant=23652
SZPS0125	JI0257	H 57		P. sativum	other	G5			Core hunter II selection	No							1965	India				https://www.seedstor.ac.uk/search-infoaccession.php?idPlant=23657
SZPS0126	JI0267	P.sativum-greece	WBH 1603 [203]	P. sativum	landrace				Core hunter II selection	No							1969	Germany	Greece	40.3	22	https://www.seedstor.ac.uk/search-infoaccession.php?idPlant=23667
SZPS0127	JI0268	P.sativum-crete	WBH 1640 [203]	P. sativum	landrace	G7			Core hunter II selection	No							1969	Germany	Greece			https://www.seedstor.ac.uk/search-infoaccession.php?idPlant=23668
SZPS0128	JI0270	P.sativum-afghanistan	WBH 1589 [203]	P. sativum	landrace				Core hunter II selection	No							1969	Germany	Afghanistan			https://www.seedstor.ac.uk/search-infoaccession.php?idPlant=23670
SZPS0129	JI0275	P.sativum-Crete	WBH 1642 [203]	P. sativum	landrace	G2			Core hunter II selection	No							1969	Germany	Greece			https://www.seedstor.ac.uk/search-infoaccession.php?idPlant=23675
SZPS0130	JI0276	P.sativum-Ethiopia	WBH 1542 [203]	P. sativum	landrace	G6			Core hunter II selection	No							1969	Germany	Ethiopia			https://www.seedstor.ac.uk/search-infoaccession.php?idPlant=23676
SZPS0131	JI0288	P.sativum-greece	WBH 1619 [203]	P. sativum	landrace	G2			Core hunter II selection	No							1969	Germany	Greece			https://www.seedstor.ac.uk/search-infoaccession.php?idPlant=23688
SZPS0132	JI0295	P.sativum-greece	WBH 1624 [203]	P. sativum	landrace				PCGIN/ modern	No						Additional known downy mildew resistant line	1969	Germany	Greece			https://www.seedstor.ac.uk/search-infoaccession.php?idPlant=23695
SZPS0133	JI0298	Daisy		P. sativum	cultivar	G5											1965	United Kingdom				https://www.seedstor.ac.uk/search-infoaccession.php?idPlant=23698
SZPS0134	JI0301	Telegraph		P. sativum	cultivar	G5			PCGIN/ modern	No						Additional known downy mildew resistant line	1965	United Kingdom				https://www.seedstor.ac.uk/search-infoaccession.php?idPlant=23701
SZPS0135	JI0303	Gradus		P. sativum	cultivar	G5			PCGIN/ modern	No						Additional known downy mildew resistant line	1965	United Kingdom				https://www.seedstor.ac.uk/search-infoaccession.php?idPlant=23703
SZPS0136	JI0304	Selected Duke Of Albany		P. sativum	cultivar	G5			PCGIN/ modern	No						Additional known downy mildew resistant line	1965	United Kingdom				https://www.seedstor.ac.uk/search-infoaccession.php?idPlant=23704
SZPS0137	JI0305	Feltham First		P. sativum	cultivar	G5			PCGIN/ modern	No						Additional known downy mildew resistant line	1965	United Kingdom				https://www.seedstor.ac.uk/search-infoaccession.php?idPlant=23705
SZPS0138	JI0314	Suttons Hundredfold		P. sativum	cultivar	G5											1965	United Kingdom				https://www.seedstor.ac.uk/search-infoaccession.php?idPlant=23714
SZPS0139	JI0318	American Wonder		P. sativum	cultivar	G5			Core hunter II selection	No							1966	United Kingdom				https://www.seedstor.ac.uk/search-infoaccession.php?idPlant=23718
SZPS0140	JI0319	Perfected Freezer-70A	D.S.P.	P. sativum	cultivar	G5			Core hunter II selection	No							1966	United States				https://www.seedstor.ac.uk/search-infoaccession.php?idPlant=23719
SZPS0141	JI0322	Chenille	L 5	P. sativum	cultivar				Core hunter II selection	yes	WL 5		ins	Type	spontaneus	known downy mildew resistant line	1966	Sweden				https://www.seedstor.ac.uk/search-infoaccession.php?idPlant=23722
SZPS0142	JI0323	Unica		P. sativum	cultivar				PCGIN/ modern	No						Additional known downy mildew resistant line	1966	Netherlands				https://www.seedstor.ac.uk/search-infoaccession.php?idPlant=23723
SZPS0143	JI0327	Onward		P. sativum	cultivar	G5			Core hunter II selection	No							1966	United Kingdom				https://www.seedstor.ac.uk/search-infoaccession.php?idPlant=23727
SZPS0144	JI0328	P.sativum-Ethiopia	WBH 2057 [203]	P. sativum	landrace	G7			PCGIN/ modern	No						Additional known downy mildew resistant line	1966	United Kingdom	Ethiopia			https://www.seedstor.ac.uk/search-infoaccession.php?idPlant=23728
SZPS0145	JI0329	Pilot	Automobile	P. sativum	cultivar	G5			PCGIN/ modern	No						Additional known downy mildew resistant line	1966	United Kingdom				https://www.seedstor.ac.uk/search-infoaccession.php?idPlant=23729
SZPS0146	JI0330	Peerless Rogue		P. sativum	cultivar	G5			PCGIN/ modern	No						Additional known downy mildew resistant line	1965	United Kingdom				https://www.seedstor.ac.uk/search-infoaccession.php?idPlant=23730
SZPS0147	JI0335	Suttons Early Giant Rogue		P. sativum	cultivar	G5			Core hunter II selection	No						Rogue	1965	United Kingdom				https://www.seedstor.ac.uk/search-infoaccession.php?idPlant=23735
SZPS0148	JI0339	Sugar Pea (Dobbies)		P. sativum	cultivar	G4			Core hunter II selection	No						Reported to be a gp mutant, but did not have yellow pods 2019/2020. Apears to have an unusual haplotype close to Gp. Is reported to be p or v - uncharacterised Mendelian locus	1966	United Kingdom				https://www.seedstor.ac.uk/search-infoaccession.php?idPlant=23739
SZPS0149	JI0340	Carters Dwarf Sugar		P. sativum	cultivar				PCGIN/ modern	No						Additional known downy mildew resistant line	1967	United Kingdom				https://www.seedstor.ac.uk/search-infoaccession.php?idPlant=23740
SZPS0150	JI0341	Chemin Longue		P. sativum	cultivar	G5			Core hunter II selection	No							1967	Hungary				https://www.seedstor.ac.uk/search-infoaccession.php?idPlant=23741
SZPS0151	JI0342	Cefalonia		P. sativum	cultivar	G5			Core hunter II selection	No						Known downy mildew sensitive line	1967	Greece				https://www.seedstor.ac.uk/search-infoaccession.php?idPlant=23742
SZPS0152	JI0344	Serpette		P. sativum	cultivar	G2			Core hunter II selection	No							1967	Greece				https://www.seedstor.ac.uk/search-infoaccession.php?idPlant=23744
SZPS0153	JI0354	Gloire De Quimper		P. sativum	cultivar	G5			Core hunter II selection	No							1968	United Kingdom				https://www.seedstor.ac.uk/search-infoaccession.php?idPlant=23754
SZPS0154	JI0356	Triomphe De Maninet		P. sativum	cultivar	G5			PCGIN/ modern	No						Additional known downy mildew resistant line	1968	United Kingdom				https://www.seedstor.ac.uk/search-infoaccession.php?idPlant=23756
SZPS0155	JI0358	Rafale		P. sativum	cultivar	G5			Core hunter II selection	No						Known downy mildew sensitive line	1968	United Kingdom	France			https://www.seedstor.ac.uk/search-infoaccession.php?idPlant=23758
SZPS0156	JI0361	Telefone De Trepar		P. sativum	cultivar	G5			Core hunter II selection	No							1968	Portugal				https://www.seedstor.ac.uk/search-infoaccession.php?idPlant=23761
SZPS0157	JI0362	EAN 44163		P. sativum	other	G5			Core hunter II selection	No							1968	Portugal				https://www.seedstor.ac.uk/search-infoaccession.php?idPlant=23762
SZPS0158	JI0364	De Obidos		P. sativum	cultivar	G2			Core hunter II selection	No							1968	Portugal				https://www.seedstor.ac.uk/search-infoaccession.php?idPlant=23764
SZPS0159	JI0368	Sabel		P. sativum	cultivar	G2			Core hunter II selection	No							1968	Portugal				https://www.seedstor.ac.uk/search-infoaccession.php?idPlant=23768
SZPS0160	JI0369	Chichara		P. sativum	cultivar				PCGIN/ modern	No						Additional known downy mildew resistant line	1968	Portugal				https://www.seedstor.ac.uk/search-infoaccession.php?idPlant=23769
SZPS0161	JI0371	Pois Gris De Printemps		P. sativum	cultivar	G2			Core hunter II selection	No							1968	Portugal				https://www.seedstor.ac.uk/search-infoaccession.php?idPlant=23771
SZPS0162	JI0378	Hero		P. sativum	cultivar	G3			PCGIN/ modern	No						Additional known downy mildew resistant line	1968	Sweden				https://www.seedstor.ac.uk/search-infoaccession.php?idPlant=23778
SZPS0163	JI0380	Valor		P. sativum	cultivar	G3			PCGIN/ modern	No						Additional known downy mildew resistant line	1968	Sweden				https://www.seedstor.ac.uk/search-infoaccession.php?idPlant=23780
SZPS0164	JI0383	Alma		P. sativum	cultivar	G5			PCGIN/ modern	No						Additional known downy mildew resistant line	1968	United Kingdom				https://www.seedstor.ac.uk/search-infoaccession.php?idPlant=23783
SZPS0165	JI0389	English Wonder		P. sativum	cultivar	G5			Core hunter II selection	No							1968	United Kingdom				https://www.seedstor.ac.uk/search-infoaccession.php?idPlant=23789
SZPS0166	JI0391	Canner 99GS		P. sativum	cultivar	G3			PCGIN/ modern	No						Additional known downy mildew resistant line	1968	United Kingdom				https://www.seedstor.ac.uk/search-infoaccession.php?idPlant=23791
SZPS0167	JI0399	Cennia		P. sativum	cultivar	G5	see JI2822	parent of JI2822		No						parental line of RIL population (with JI15, parent of JI2822)	1968	Netherlands				https://www.seedstor.ac.uk/search-infoaccession.php?idPlant=23799
SZPS0168	JI0400	Famous		P. sativum	cultivar	G5			Core hunter II selection	No							1968	United States				https://www.seedstor.ac.uk/search-infoaccession.php?idPlant=23800
SZPS0169	JI0402	Jade		P. sativum	cultivar	G5			Core hunter II selection	No							1968	United Kingdom				https://www.seedstor.ac.uk/search-infoaccession.php?idPlant=23802
SZPS0170	JI0406	Small Sieve Freezer		P. sativum	other	G5			PCGIN/ modern	No						Additional known downy mildew resistant line	1968	United Kingdom				https://www.seedstor.ac.uk/search-infoaccession.php?idPlant=23806
SZPS0171	JI0409	Big Ben		P. sativum	cultivar				Core hunter II selection	No							1968	United Kingdom	Netherlands			https://www.seedstor.ac.uk/search-infoaccession.php?idPlant=23809
SZPS0172	JI0411	Cobri		P. sativum	cultivar	G5			PCGIN/ modern	No						Additional known downy mildew resistant line	1968	Netherlands				https://www.seedstor.ac.uk/search-infoaccession.php?idPlant=23811
SZPS0173	JI0417	Lincoln	Prodige, Sans R	P. sativum	cultivar	G5			Core hunter II selection	No							1968	United Kingdom				https://www.seedstor.ac.uk/search-infoaccession.php?idPlant=23817
SZPS0174	JI0420	New Line Perfection		P. sativum	cultivar	G5			Core hunter II selection	No							1968	United Kingdom				https://www.seedstor.ac.uk/search-infoaccession.php?idPlant=23820
SZPS0175	JI0423	Dik Trom		P. sativum	cultivar	G5			Core hunter II selection	yes	JI 423		Rap2				1968	Netherlands				https://www.seedstor.ac.uk/search-infoaccession.php?idPlant=23823
SZPS0176	JI0424	Pauli		P. sativum	cultivar				Core hunter II selection	No							1968	Netherlands				https://www.seedstor.ac.uk/search-infoaccession.php?idPlant=23824
SZPS0177	JI0428	Johnsons Freezer		P. sativum	cultivar	G5			Core hunter II selection	No							1968	United Kingdom				https://www.seedstor.ac.uk/search-infoaccession.php?idPlant=23828
SZPS0178	JI0430	Greenshaft	GREEN ARROW, JAVELIN	P. sativum	cultivar	G5	Greenshaft		PCGIN/ modern	yes	Greenshaft		r	Repr		JI0430 (Parent of BC lines for R/r)	1968	United Kingdom				https://www.seedstor.ac.uk/search-infoaccession.php?idPlant=23830
SZPS0179	JI0434	Commando		P. sativum	cultivar	G5											1968	United States				https://www.seedstor.ac.uk/search-infoaccession.php?idPlant=23834
SZPS0180	JI0441	Puget		P. sativum	cultivar	G5			PCGIN/ modern	No						Additional known downy mildew resistant line	1969	United Kingdom				https://www.seedstor.ac.uk/search-infoaccession.php?idPlant=23841
SZPS0181	JI0460	Target		P. sativum	cultivar	G5			Core hunter II selection	No							1969	United States				https://www.seedstor.ac.uk/search-infoaccession.php?idPlant=23860
SZPS0182	JI0466	Early Thirty Days		P. sativum	cultivar	G2			PCGIN/ modern	No						Additional known downy mildew resistant line	1969	Japan				https://www.seedstor.ac.uk/search-infoaccession.php?idPlant=23866
SZPS0183	JI0467	Dwarf Sugar		P. sativum	cultivar				PCGIN/ modern	No						Additional known downy mildew resistant line	1969	Japan				https://www.seedstor.ac.uk/search-infoaccession.php?idPlant=23867
SZPS0184	JI0474	Neptune		P. sativum	cultivar	G5			Core hunter II selection	No							1969	United States				https://www.seedstor.ac.uk/search-infoaccession.php?idPlant=23874
SZPS0185	JI0491	Triton		P. sativum	cultivar	G5			Core hunter II selection	No							1969	Netherlands				https://www.seedstor.ac.uk/search-infoaccession.php?idPlant=23891
SZPS0186	JI0496	405		P. sativum	other	G5			Core hunter II selection	No							1969	United Kingdom				https://www.seedstor.ac.uk/search-infoaccession.php?idPlant=23896
SZPS0187	JI0498	Excel		P. sativum	cultivar	G5			Core hunter II selection	No							1969	United Kingdom				https://www.seedstor.ac.uk/search-infoaccession.php?idPlant=23898
SZPS0188	JI0504	Greenfeast		P. sativum	cultivar	G5			PCGIN/ modern	No						Additional known downy mildew resistant line	1969	United Kingdom				https://www.seedstor.ac.uk/search-infoaccession.php?idPlant=23904
SZPS0189	JI0506	Puget-86-64		P. sativum	cultivar	G5			Core hunter II selection	No						Known downy mildew sensitive line	1969	United Kingdom				https://www.seedstor.ac.uk/search-infoaccession.php?idPlant=23906
SZPS0190	JI0516	Maro		P. sativum	cultivar		JI0516	JI0516	PCGIN/ modern	No						Known downy mildew sensitive line, cv Maro	1969	United Kingdom				https://www.seedstor.ac.uk/search-infoaccession.php?idPlant=23916
SZPS0191	JI0531	Alaska-14A		P. sativum	cultivar	G5			Core hunter II selection	No							1969	United States				https://www.seedstor.ac.uk/search-infoaccession.php?idPlant=23931
SZPS0192	JI0536	Olympic A		P. sativum	cultivar	G5			Core hunter II selection	No							1969	United States				https://www.seedstor.ac.uk/search-infoaccession.php?idPlant=23936
SZPS0193	JI0539	Freezer-69		P. sativum	cultivar	G5			Core hunter II selection	No							1969	United States				https://www.seedstor.ac.uk/search-infoaccession.php?idPlant=23939
SZPS0194	JI0546	Gottinga		P. sativum	cultivar	G5			PCGIN/ modern	No						Additional known downy mildew resistant line	1969	Germany				https://www.seedstor.ac.uk/search-infoaccession.php?idPlant=23946
SZPS0195	JI0550	NZ 198		P. sativum	other	G5			Core hunter II selection	No							1969	Germany				https://www.seedstor.ac.uk/search-infoaccession.php?idPlant=23950
SZPS0196	JI0554	Siegerin		P. sativum	cultivar	G5			Core hunter II selection	No							1969	Germany				https://www.seedstor.ac.uk/search-infoaccession.php?idPlant=23954
SZPS0197	JI0558	Clauselan		P. sativum	cultivar	G2			Core hunter II selection	No							1969	France				https://www.seedstor.ac.uk/search-infoaccession.php?idPlant=23958
SZPS0198	JI0560	Clause-50		P. sativum	cultivar	G5			PCGIN/ modern	No						Additional known downy mildew resistant line	1969	France				https://www.seedstor.ac.uk/search-infoaccession.php?idPlant=23960
SZPS0199	JI0566	Oberon		P. sativum	cultivar	G5			Core hunter II selection	No							1969	France				https://www.seedstor.ac.uk/search-infoaccession.php?idPlant=23966
SZPS0200	JI0568	Disko		P. sativum	cultivar	G5			Core hunter II selection	No							1969	Denmark				https://www.seedstor.ac.uk/search-infoaccession.php?idPlant=23968
SZPS0201	JI0571	WV-160F		P. sativum	other	G5			Core hunter II selection	No							1969	United States				https://www.seedstor.ac.uk/search-infoaccession.php?idPlant=23971
SZPS0202	JI0573	WV-192F		P. sativum	other	G5			Core hunter II selection	No							1969	United States				https://www.seedstor.ac.uk/search-infoaccession.php?idPlant=23973
SZPS0203	JI0574	Polarette		P. sativum	cultivar	G5			PCGIN/ modern	No						Additional known downy mildew resistant line	1969	Netherlands				https://www.seedstor.ac.uk/search-infoaccession.php?idPlant=23974
SZPS0204	JI0582	Vitalette		P. sativum	cultivar	G5			Core hunter II selection	No							1969	Netherlands				https://www.seedstor.ac.uk/search-infoaccession.php?idPlant=23982
SZPS0205	JI0584	Recette (C-4)		P. sativum	cultivar	G5			PCGIN/ modern	No						Additional known downy mildew resistant line	1969	Netherlands				https://www.seedstor.ac.uk/search-infoaccession.php?idPlant=23984
SZPS0206	JI0607	Early Perfection-3040		P. sativum	cultivar	G5			PCGIN/ modern	No						Additional known downy mildew resistant line	1969	United States				https://www.seedstor.ac.uk/search-infoaccession.php?idPlant=24007
SZPS0207	JI0614	ICER-95		P. sativum	other	G5			Core hunter II selection	No							1969	United States				https://www.seedstor.ac.uk/search-infoaccession.php?idPlant=24014
SZPS0208	JI0616	Michauxi		P. sativum	cultivar	G2			Core hunter II selection	No							1969	Canada				https://www.seedstor.ac.uk/search-infoaccession.php?idPlant=24016
SZPS0209	JI0635	Vilmorin Vi		P. sativum	cultivar	G2			Core hunter II selection	No							1967	Hungary				https://www.seedstor.ac.uk/search-infoaccession.php?idPlant=24035
SZPS0210	JI0651	Maiperle		P. sativum	cultivar	G5			Core hunter II selection	No							1967	Hungary				https://www.seedstor.ac.uk/search-infoaccession.php?idPlant=24051
SZPS0211	JI0653	Miracle	WBH 2292 [203]	P. sativum	cultivar	G5			PCGIN/ modern	No						Additional known downy mildew resistant line	1967	Hungary				https://www.seedstor.ac.uk/search-infoaccession.php?idPlant=24053
SZPS0212	JI0657	Mansholts Ivora	WBH 2289 [203]	P. sativum	cultivar	G4			PCGIN/ modern	No						Additional known downy mildew resistant line	1967	Hungary				https://www.seedstor.ac.uk/search-infoaccession.php?idPlant=24057
SZPS0213	JI0662	Rapid		P. sativum	cultivar	G5			Core hunter II selection	No							1967	Hungary				https://www.seedstor.ac.uk/search-infoaccession.php?idPlant=24062
SZPS0214	JI0665	Lancashire Lad		P. sativum	cultivar	G5			Core hunter II selection	No							1967	Hungary				https://www.seedstor.ac.uk/search-infoaccession.php?idPlant=24065
SZPS0215	JI0670	Monarch		P. sativum	cultivar	G5			Core hunter II selection	No							1967	Hungary				https://www.seedstor.ac.uk/search-infoaccession.php?idPlant=24070
SZPS0216	JI0681	Volantaise Clause		P. sativum	cultivar	G5			Core hunter II selection	No							1967	Hungary				https://www.seedstor.ac.uk/search-infoaccession.php?idPlant=24081
SZPS0217	JI0692	Leningrad-P62		P. sativum	cultivar	G3			Core hunter II selection	No							1961	No data				https://www.seedstor.ac.uk/search-infoaccession.php?idPlant=24092
SZPS0218	JI0693	Brochette Purple Flowered		P. sativum	cultivar				Core hunter II selection	No							1961	No data				https://www.seedstor.ac.uk/search-infoaccession.php?idPlant=24093
SZPS0219	JI0695	Purple Podded Green Back		P. sativum	other	G4			PCGIN/ modern	No						JI0695 has purple pods. Mendel was interested in those too	1961	No data				https://www.seedstor.ac.uk/search-infoaccession.php?idPlant=24095
SZPS0220	JI0699	Karmazinovyi Gibrid		P. sativum	cultivar	G3			Core hunter II selection	No							1961	Russia				https://www.seedstor.ac.uk/search-infoaccession.php?idPlant=24099
SZPS0221	JI0701	P.sativum-Italy		P. sativum	landrace	G2			Core hunter II selection	No						Known downy mildew sensitive line	1961	Russia				https://www.seedstor.ac.uk/search-infoaccession.php?idPlant=24101
SZPS0222	JI0703	Finnische Futtererbse	WBH 2456 [203]	P. sativum	cultivar	G3			Core hunter II selection	No							1961	Germany				https://www.seedstor.ac.uk/search-infoaccession.php?idPlant=24103
SZPS0223	JI0705	P.sativum-Afghanistan	WBH 1897 [203]	P. sativum	landrace	G2			Core hunter II selection	No							1961	Germany	Afghanistan			https://www.seedstor.ac.uk/search-infoaccession.php?idPlant=24105
SZPS0224	JI0711	Austrian Winter		P. sativum	cultivar		Austrian Winter		PCGIN/ modern	No	Aust. Winter		Rpp-2, rpp-1, Rpp-3	Type	wild type	Additional known downy mildew resistant line. Austrian Winter; a common parent in many breeding programmes	1961	United Kingdom				https://www.seedstor.ac.uk/search-infoaccession.php?idPlant=24111
SZPS0225	JI0712	Maple Pea		P. sativum	cultivar	G3			Core hunter II selection	No							1961	No data				https://www.seedstor.ac.uk/search-infoaccession.php?idPlant=24112
SZPS0226	JI0716	P.sativum Ankoberense		P. sativum	landrace	G6			Core hunter II selection	No							1961	Germany	Afghanistan	34.51	69.18	https://www.seedstor.ac.uk/search-infoaccession.php?idPlant=24116
SZPS0227	JI0717	Mansholts Ivora		P. sativum	cultivar	G4			Core hunter II selection	No							1961	No data				https://www.seedstor.ac.uk/search-infoaccession.php?idPlant=24117
SZPS0228	JI0718	Omega-Waxless		P. sativum	cultivar				Core hunter II selection	No							1961	Germany				https://www.seedstor.ac.uk/search-infoaccession.php?idPlant=24118
SZPS0229	JI0720	Maienmark		P. sativum	cultivar	G5			Core hunter II selection	No							1961	Germany				https://www.seedstor.ac.uk/search-infoaccession.php?idPlant=24120
SZPS0230	JI0721	Excelsior		P. sativum	cultivar	G5			Core hunter II selection	No							1961	Germany				https://www.seedstor.ac.uk/search-infoaccession.php?idPlant=24121
SZPS0231	JI0727	B265-1347-2		P. sativum	other	G5			Core hunter II selection	No							1968	United States				https://www.seedstor.ac.uk/search-infoaccession.php?idPlant=24127
SZPS0232	JI0734	Rudukai		P. sativum	other	G3			PCGIN/ modern	No						Additional known downy mildew resistant line	1968	Russia	Lithuania			https://www.seedstor.ac.uk/search-infoaccession.php?idPlant=24134
SZPS0233	JI0735	Greitukia		P. sativum	other	G3			Core hunter II selection	No							1968	Russia	Lithuania			https://www.seedstor.ac.uk/search-infoaccession.php?idPlant=24135
SZPS0234	JI0737	Asmer 007&#047;65		P. sativum	other	G5			Core hunter II selection	No							1969	United States				https://www.seedstor.ac.uk/search-infoaccession.php?idPlant=24137
SZPS0235	JI0738	Asmer 008&#047;65		P. sativum	other	G5			Core hunter II selection	No							1969	United States				https://www.seedstor.ac.uk/search-infoaccession.php?idPlant=24138
SZPS0236	JI0745	Asmer 017&#047;65		P. sativum	other	G5			Core hunter II selection	No							1969	United States				https://www.seedstor.ac.uk/search-infoaccession.php?idPlant=24145
SZPS0237	JI0746	Asmer 018&#047;65		P. sativum	other	G5			Core hunter II selection	No							1969	United States				https://www.seedstor.ac.uk/search-infoaccession.php?idPlant=24146
SZPS0238	JI0752	P.sativum-India	No. 9629	P. sativum	landrace	G6			Core hunter II selection	No							1969	United States	India	30.25	79.33	https://www.seedstor.ac.uk/search-infoaccession.php?idPlant=24152
SZPS0239	JI0754	Gr.Seeded Profusion		P. sativum	cultivar	G6			Core hunter II selection	No							1969	United States				https://www.seedstor.ac.uk/search-infoaccession.php?idPlant=24154
SZPS0240	JI0757	Supcovert		P. sativum	cultivar	G5			Core hunter II selection	No							1969	Netherlands				https://www.seedstor.ac.uk/search-infoaccession.php?idPlant=24157
SZPS0241	JI0774	Early Flowering		P. sativum	other	G5			Core hunter II selection	No							1968	Denmark				https://www.seedstor.ac.uk/search-infoaccession.php?idPlant=24174
SZPS0242	JI0780	DA 1608		P. sativum	other	G5			Core hunter II selection	No							1970	United Kingdom				https://www.seedstor.ac.uk/search-infoaccession.php?idPlant=24180
SZPS0243	JI0781	Laxton Superb		P. sativum	cultivar	G5			PCGIN/ modern	No						Additional known downy mildew resistant line	1970	United Kingdom				https://www.seedstor.ac.uk/search-infoaccession.php?idPlant=24181
SZPS0244	JI0782	Martus	XP-M-67 [2668]	P. sativum	cultivar				Core hunter II selection	No							1970	United Kingdom				https://www.seedstor.ac.uk/search-infoaccession.php?idPlant=24182
SZPS0245	JI0787	Minerva	Minerva Maple	P. sativum	cultivar	G3			PCGIN/ modern	No						cv Minerva (PCGIN line of interest)	1970	United Kingdom				https://www.seedstor.ac.uk/search-infoaccession.php?idPlant=24187
SZPS0246	JI0790	Elvira		P. sativum	cultivar	G5			Core hunter II selection	No							1970	United Kingdom				https://www.seedstor.ac.uk/search-infoaccession.php?idPlant=24190
SZPS0247	JI0794	WBH 774		P. sativum	other	G3			PCGIN/ modern	yes	WL 774		str	Type		Additional known downy mildew resistant line	1970	Sweden				https://www.seedstor.ac.uk/search-infoaccession.php?idPlant=24194
SZPS0248	JI0795	WBH 1307		P. sativum	other	G4			PCGIN/ modern	yes	WL 137		beg	Type	spontaneous	Additional known downy mildew resistant line	1970	Sweden				https://www.seedstor.ac.uk/search-infoaccession.php?idPlant=24195
SZPS0249	JI0799	Goldkonig		P. sativum	cultivar	G5			PCGIN/ modern	yes	WL 2		Br	Type		Known downy mildew sensitive line. JI0799 is similar in phenotype to JI0037. Both are example of yellow foliage and pods that turn yellow eventually. They both have very wide pods (lt) and thick pod walls (n)	1970	Sweden				https://www.seedstor.ac.uk/search-infoaccession.php?idPlant=24199
SZPS0250	JI0804	P. tibetanicum		P. sativum	other wild	G5			PCGIN/ modern	yes	P. tibetanicum		ru	Repr		Additional known downy mildew resistant line	1970	Sweden				https://www.seedstor.ac.uk/search-infoaccession.php?idPlant=24204
SZPS0251	JI0806	Navicula Apertus-nap		P. sativum	other	G3			Core hunter II selection	No						Known downy mildew sensitive line	1970	Sweden				https://www.seedstor.ac.uk/search-infoaccession.php?idPlant=24206
SZPS0252	JI0807	P.sativum-Turkey	L 2127	P. sativum	landrace				PCGIN/ modern	yes	WL 1438		D<w	Repr		Additional known downy mildew resistant line	1970	Sweden	Turkey			https://www.seedstor.ac.uk/search-infoaccession.php?idPlant=24207
SZPS0253	JI0808	Winter Hardy		P. sativum	cultivar				Core hunter II selection	No							1970	United Kingdom				https://www.seedstor.ac.uk/search-infoaccession.php?idPlant=24208
SZPS0254	JI0813	Yellow Pollen-yp		P. sativum	other	G4	JI2436	JI2436	Core hunter II selection	yes	51y		arg	Type			1968	Australia				https://www.seedstor.ac.uk/search-infoaccession.php?idPlant=24213
SZPS0255	JI0814	Marx Fasciated-fa		P. sativum	other	G5			PCGIN/ modern	No						JI0814 (fa mutant - uncharacterised Mendelian locus - would be good to identify the parental line)	1970	United States				https://www.seedstor.ac.uk/search-infoaccession.php?idPlant=24214
SZPS0256	JI0815	Undulatifolius-un		P. sativum	other				Core hunter II selection	yes	WL 1143		Int	Type			1970	Sweden				https://www.seedstor.ac.uk/search-infoaccession.php?idPlant=24215
SZPS0257	JI0817	Wisconsin-711		P. sativum	other	G5			PCGIN/ modern	No						Additional known downy mildew resistant line	1970	Sweden				https://www.seedstor.ac.uk/search-infoaccession.php?idPlant=24217
SZPS0258	JI0819	Ageotropum-age		P. sativum	other	G5			Core hunter II selection	yes	WL 512		age	Type	induced X		1970	Sweden				https://www.seedstor.ac.uk/search-infoaccession.php?idPlant=24219
SZPS0259	JI0820	Stiff Straw		P. sativum	other				Core hunter II selection	No							1970	Sweden				https://www.seedstor.ac.uk/search-infoaccession.php?idPlant=24220
SZPS0260	JI0825	Fasciated-fa		P. sativum	other		?DGV	possibly DGV	PCGIN/ modern	yes	Gott. 489C		ccr	Type	X-ray	JI0825 (fa mutant - uncharacterised Mendelian locus - would be good to identify the parental line)	1969	Germany				https://www.seedstor.ac.uk/search-infoaccession.php?idPlant=24225
SZPS0261	JI0829	Maximo-Reductus-mare		P. sativum	other	G5			PCGIN/ modern	No						Additional known downy mildew resistant line	1970	Sweden				https://www.seedstor.ac.uk/search-infoaccession.php?idPlant=24229
SZPS0262	JI0832	Maximo-Reductus-mare		P. sativum	other	G5			Core hunter II selection	No						Known downy mildew sensitive line	1970	Sweden				https://www.seedstor.ac.uk/search-infoaccession.php?idPlant=24232
SZPS0263	JI0837	Maximo-Reductus-mare		P. sativum	other	G5			Core hunter II selection	No						Known downy mildew sensitive line	1970	Sweden				https://www.seedstor.ac.uk/search-infoaccession.php?idPlant=24237
SZPS0264	JI0841	Lamm 19	L 19	P. sativum	other	G5			Core hunter II selection	No							1970	Sweden				https://www.seedstor.ac.uk/search-infoaccession.php?idPlant=24241
SZPS0265	JI0844	Nilssons Angustifolia		P. sativum	other	G5			PCGIN/ modern	yes	WL 483		ang	Type		Additional known downy mildew resistant line	1970	Sweden				https://www.seedstor.ac.uk/search-infoaccession.php?idPlant=24244
SZPS0266	JI0846	Horizontalis-ho		P. sativum	other				PCGIN/ modern	yes	WL 118		ho	Type		Additional known downy mildew resistant line	1970	Sweden				https://www.seedstor.ac.uk/search-infoaccession.php?idPlant=24246
SZPS0267	JI0853	P.sativum-usa		P. sativum	landrace	G5			Core hunter II selection	No							1970	United States				https://www.seedstor.ac.uk/search-infoaccession.php?idPlant=24253
SZPS0268	JI0854	Narrow Leaves dim-1		P. sativum	other	G5			Core hunter II selection	No							1970	Germany				https://www.seedstor.ac.uk/search-infoaccession.php?idPlant=24254
SZPS0269	JI0859	Midinette	SLEAFD.SALUTE [1476]	P. sativum	cultivar	G5			Core hunter II selection	No							1971	United Kingdom				https://www.seedstor.ac.uk/search-infoaccession.php?idPlant=24259
SZPS0270	JI0863	Black Eyed Susan Tetraploid		P. sativum	cultivar	G2			Core hunter II selection	No						Known downy mildew sensitive line	1966	United Kingdom				https://www.seedstor.ac.uk/search-infoaccession.php?idPlant=24263
SZPS0271	JI0870	Gradus Rogue		P. sativum	cultivar	G5			PCGIN/ modern	No						Additional known downy mildew resistant line	1965	United Kingdom				https://www.seedstor.ac.uk/search-infoaccession.php?idPlant=24270
SZPS0272	JI0874	Thomas Laxton Rogue		P. sativum	cultivar	G5			Core hunter II selection	No						Rogue	1965	United States				https://www.seedstor.ac.uk/search-infoaccession.php?idPlant=24274
SZPS0273	JI0877	Pioneer Rogue		P. sativum	cultivar	G5			PCGIN/ modern	No						Additional known downy mildew resistant line	1966	United Kingdom				https://www.seedstor.ac.uk/search-infoaccession.php?idPlant=24277
SZPS0274	JI0884	Feltham First Rogue		P. sativum	cultivar	G5			PCGIN/ modern	No						Additional known downy mildew resistant line	1966	United Kingdom				https://www.seedstor.ac.uk/search-infoaccession.php?idPlant=24284
SZPS0275	JI0887	Black Eyed Susan Rogue		P. sativum	cultivar	G2			PCGIN/ modern	No						Additional known downy mildew resistant line	1966	No data				https://www.seedstor.ac.uk/search-infoaccession.php?idPlant=24287
SZPS0276	JI0892	Kinnauri Local Rogue		P. sativum	cultivar	G2			PCGIN/ modern	No						Additional known downy mildew resistant line	1966	United Kingdom				https://www.seedstor.ac.uk/search-infoaccession.php?idPlant=24291
SZPS0277	JI0893	Kinnauri Local Rogue		P. sativum	cultivar	G2			PCGIN/ modern	No						Additional known downy mildew resistant line	1966	United Kingdom				https://www.seedstor.ac.uk/search-infoaccession.php?idPlant=24292
SZPS0278	JI0907	Terminalis-alt	4229/st	P. sativum	other	G5			PCGIN/ modern	yes	WL 118		alt	Type		Additional known downy mildew resistant line	1971	Sweden				https://www.seedstor.ac.uk/search-infoaccession.php?idPlant=24304
SZPS0279	JI0909	Terminalis Xantha-xat		P. sativum	other				PCGIN/ modern	yes	WL 896		xat	Type		Additional known downy mildew resistant line	1971	Sweden				https://www.seedstor.ac.uk/search-infoaccession.php?idPlant=24306
SZPS0280	JI0930	Venlona 2		P. sativum	cultivar	G5			Core hunter II selection	No							1971	Netherlands				https://www.seedstor.ac.uk/search-infoaccession.php?idPlant=24327
SZPS0281	JI0932	Weitor		P. sativum	cultivar	G3	Weitor	Weitor	PCGIN/ modern	yes	WL 1263		Age	Type	wild type	Additional known downy mildew resistant line (Listed as Weitor in Seedstor)	1972	United Kingdom				https://www.seedstor.ac.uk/search-infoaccession.php?idPlant=24329
SZPS0282	JI0935	Delwiche Commando		P. sativum	cultivar	G5			PCGIN/ modern	No						Additional known downy mildew resistant line	1972	No data				https://www.seedstor.ac.uk/search-infoaccession.php?idPlant=24332
SZPS0283	JI0949	P.sativum-India		P. sativum	landrace	G1			Core hunter II selection	No							1973	Canada	India	21.5	76.2	https://www.seedstor.ac.uk/search-infoaccession.php?idPlant=24346
SZPS0284	JI0952	Koroza		P. sativum	cultivar	G4			Core hunter II selection	No						known downy mildew resistant line	1974	Sweden				https://www.seedstor.ac.uk/search-infoaccession.php?idPlant=24349
SZPS0285	JI0955	Centuary		P. sativum	cultivar				Core hunter II selection	No							1974	Germany				https://www.seedstor.ac.uk/search-infoaccession.php?idPlant=24352
SZPS0286	JI0957	Triumph		P. sativum	cultivar				PCGIN/ modern	No						Additional known downy mildew resistant line	1974	No data				https://www.seedstor.ac.uk/search-infoaccession.php?idPlant=24354
SZPS0287	JI0958	IHAR-16		P. sativum	other				Core hunter II selection	No							1975	No data				https://www.seedstor.ac.uk/search-infoaccession.php?idPlant=24355
SZPS0288	JI0965	P.sativum-Turkey		P. sativum	landrace				Core hunter II selection	No							1971	United States				https://www.seedstor.ac.uk/search-infoaccession.php?idPlant=24362
SZPS0289	JI0968	P.sativum-Ethiopia		P. sativum	landrace	G1			Core hunter II selection	yes	PI 193835		wlv	Type			1975	United States	Ethiopia			https://www.seedstor.ac.uk/search-infoaccession.php?idPlant=24365
SZPS0290	JI0971	Reva		P. sativum	cultivar				Core hunter II selection	No							1975	United States				https://www.seedstor.ac.uk/search-infoaccession.php?idPlant=24368
SZPS0291	JI0974	Purple Pods	Aa96, P19	P. sativum	other	G4			PCGIN/ modern	No						JI0974 has purple pods (Pu or Pur). Mendel was interested in those too.	1975	United States				https://www.seedstor.ac.uk/search-infoaccession.php?idPlant=24371
SZPS0292	JI0991	Trumpet		P. sativum	cultivar	G5			Core hunter II selection	No						Reportedly gp, but did not have yellow pods 2019/2020, very poor vigour, suggested replacement with JI2366 which is yellow pod (gp), is p or v and has cream flowers (crw)	1976	United Kingdom				https://www.seedstor.ac.uk/search-infoaccession.php?idPlant=24388
SZPS0293	JI1002	Torsdag-K483	WBH 5860 [203]	P. sativum	other	G3			Core hunter II selection	No							1975	Russia				https://www.seedstor.ac.uk/search-infoaccession.php?idPlant=24399
SZPS0294	JI1014	Maro Rogue		P. sativum	cultivar		JI0516	JI0516	PCGIN/ modern	No						JI1014 Rogue of Maro	1976	United Kingdom				https://www.seedstor.ac.uk/search-infoaccession.php?idPlant=24411
SZPS0295	JI1017	Kelvedon Wonder		P. sativum	cultivar	G5			Core hunter II selection	No							1976	United Kingdom				https://www.seedstor.ac.uk/search-infoaccession.php?idPlant=24414
SZPS0296	JI1018	Tezieridee		P. sativum	cultivar	G5			Core hunter II selection	No							1976	United Kingdom				https://www.seedstor.ac.uk/search-infoaccession.php?idPlant=24415
SZPS0297	JI1035	P.sativum-Turkey		P. sativum	landrace				Core hunter II selection	No							1976	United States	Turkey			https://www.seedstor.ac.uk/search-infoaccession.php?idPlant=24432
SZPS0298	JI1041	The Lincoln		P. sativum	cultivar				Core hunter II selection	No							1976	United States				https://www.seedstor.ac.uk/search-infoaccession.php?idPlant=24438
SZPS0299	JI1043	King Tut		P. sativum	landrace				Core hunter II selection	No							1976	United States				https://www.seedstor.ac.uk/search-infoaccession.php?idPlant=24440
SZPS0300	JI1055	Ica Bojaca		P. sativum	cultivar	G3			Core hunter II selection	No							1976	Australia	Colombia			https://www.seedstor.ac.uk/search-infoaccession.php?idPlant=24452
SZPS0301	JI1058	Ica Guatecana		P. sativum	cultivar	G2			Core hunter II selection	No							1976	Australia	Colombia			https://www.seedstor.ac.uk/search-infoaccession.php?idPlant=24455
SZPS0302	JI1059	Cundinamarca-1		P. sativum	cultivar	G2			Core hunter II selection	No							1976	Australia	Colombia			https://www.seedstor.ac.uk/search-infoaccession.php?idPlant=24456
SZPS0303	JI1071	Beseliya	22710	P. sativum	cultivar	G2			Core hunter II selection	No						p or v - uncharacterised Mendelian locus	1971	United States	Turkey	36.19	29.19	https://www.seedstor.ac.uk/search-infoaccession.php?idPlant=24468
SZPS0304	JI1078	P.sativum-Turkey		P. sativum	landrace	G2			Core hunter II selection	No							1971	United States	Turkey			https://www.seedstor.ac.uk/search-infoaccession.php?idPlant=24475
SZPS0305	JI1082	P.sativum-Turkey		P. sativum	landrace	G2			Core hunter II selection	No							1971	United States	Turkey	37.45	27.3	https://www.seedstor.ac.uk/search-infoaccession.php?idPlant=24479
SZPS0306	JI1084	P.sativum-Turkey		P. sativum	landrace	G2			Core hunter II selection	No							1971	United States	Turkey			https://www.seedstor.ac.uk/search-infoaccession.php?idPlant=24481
SZPS0307	JI1085	P.sativum-Turkey		P. sativum	landrace	G2			Core hunter II selection	No							1971	United States	Turkey	38.3	27.43	https://www.seedstor.ac.uk/search-infoaccession.php?idPlant=24482
SZPS0308	JI1086	P.sativum-Turkey		P. sativum	landrace				Core hunter II selection	No						p or v - uncharacterised Mendelian locus	1971	United States	Turkey	38.25	27.38	https://www.seedstor.ac.uk/search-infoaccession.php?idPlant=24483
SZPS0309	JI1109	Keerau Pea		P. sativum	landrace	G6			Core hunter II selection	No							1971	Nepal	Nepal			https://www.seedstor.ac.uk/search-infoaccession.php?idPlant=24506
SZPS0310	JI1117	Keerau Pea	P1/17 [286]	P. sativum	landrace	G6			Core hunter II selection	No							1961	Nepal	Nepal	27.55	83.27	https://www.seedstor.ac.uk/search-infoaccession.php?idPlant=24513
SZPS0311	JI1121	Keerau Pea	P1/22 [286]	P. sativum	cultivar	G6			Core hunter II selection	No							1961	Nepal	Nepal			https://www.seedstor.ac.uk/search-infoaccession.php?idPlant=24517
SZPS0312	JI1125	P.sativum-India		P. sativum	landrace				Core hunter II selection	No							1966	Canada	India	12.53	74.95	https://www.seedstor.ac.uk/search-infoaccession.php?idPlant=24521
SZPS0313	JI1128	P.sativum-India		P. sativum	landrace				Core hunter II selection	No							1966	Canada	India	26.51	80.55	https://www.seedstor.ac.uk/search-infoaccession.php?idPlant=24524
SZPS0314	JI1129	P.sativum-Turkey		P. sativum	landrace	G2			Core hunter II selection	No							1966	Canada	Turkey			https://www.seedstor.ac.uk/search-infoaccession.php?idPlant=24525
SZPS0315	JI1132	P.sativum-Turkey		P. sativum	landrace	G2			Core hunter II selection	No						p or v - uncharacterised Mendelian locus	1966	Canada	Turkey			https://www.seedstor.ac.uk/search-infoaccession.php?idPlant=24528
SZPS0316	JI1147	P.sativum-USA		P. sativum	landrace	G5				No						JI1147 sgr variant of interest	1966	Canada				https://www.seedstor.ac.uk/search-infoaccession.php?idPlant=24543
SZPS0317	JI1165	Suttons Show Perfection		P. sativum	cultivar	G5			Core hunter II selection	No							1973	Canada				https://www.seedstor.ac.uk/search-infoaccession.php?idPlant=24561
SZPS0318	JI1173	Ervilhe Casusa		P. sativum	cultivar	G2			Core hunter II selection	No							1977	United Kingdom	Portugal	37.05	-8.15	https://www.seedstor.ac.uk/search-infoaccession.php?idPlant=24569
SZPS0319	JI1179	Marx G2-Type		P. sativum	other	G5			Core hunter II selection	No							1977	United States				https://www.seedstor.ac.uk/search-infoaccession.php?idPlant=24575
SZPS0320	JI1187	Elegante		P. sativum	cultivar	G5			Core hunter II selection	No							1977	Brazil				https://www.seedstor.ac.uk/search-infoaccession.php?idPlant=24583
SZPS0321	JI1194	MISOG-1:Conventional		P. sativum	other	G5				No						Known downy mildew sensitive line. RI line parent	1974	United States				https://www.seedstor.ac.uk/search-infoaccession.php?idPlant=24589
SZPS0322	JI1200	MISOG-1:st,tl		P. sativum	other	G5			PCGIN/ modern	No						Additional known downy mildew resistant line	1974	United States				https://www.seedstor.ac.uk/search-infoaccession.php?idPlant=24595
SZPS0323	JI1201	MISOG-1:af,st,tl		P. sativum	other	G5			Eliminated	No						JI1201 (see JI1205 above af tl st MISOG1 line also parent of RIL population 1201x813), Known downy mildew swensitive line	1974	United States				https://www.seedstor.ac.uk/search-infoaccession.php?idPlant=24596
SZPS0324	JI1205	MISOG-2:tl		P. sativum	other	G5			Core hunter II selection	No						This is MISOG 2 (tl). Known downy mildew sensitive line	1974	United States				https://www.seedstor.ac.uk/search-infoaccession.php?idPlant=24600
SZPS0325	JI1210	Erygel		P. sativum	cultivar	G5			PCGIN/ modern	No						Additional known downy mildew resistant line	1978	France				https://www.seedstor.ac.uk/search-infoaccession.php?idPlant=24605
SZPS0326	JI1212	Florivert		P. sativum	cultivar	G5			Core hunter II selection	No							1978	France				https://www.seedstor.ac.uk/search-infoaccession.php?idPlant=24607
SZPS0327	JI1214	Trianon		P. sativum	cultivar	G5			Core hunter II selection	No							1978	France				https://www.seedstor.ac.uk/search-infoaccession.php?idPlant=24609
SZPS0328	JI1217	HJA 51237-af	WBH 3068 [203]	P. sativum	other	G5			Core hunter II selection	No							1979	Finland				https://www.seedstor.ac.uk/search-infoaccession.php?idPlant=24612
SZPS0329	JI1219	HJA 51277-af	WBH 3070 [203]	P. sativum	other	G5			PCGIN/ modern	No						Additional known downy mildew resistant line	1979	Finland				https://www.seedstor.ac.uk/search-infoaccession.php?idPlant=24614
SZPS0330	JI1222	POL 4:af		P. sativum	other	G3			Core hunter II selection	No							1979	Poland				https://www.seedstor.ac.uk/search-infoaccession.php?idPlant=24617
SZPS0331	JI1224	POL 13:big seed		P. sativum	other	G4			Core hunter II selection	No						appears to be a b, ce double mutant. Flowers almost white. Axils redish	1979	Poland				https://www.seedstor.ac.uk/search-infoaccession.php?idPlant=24619
SZPS0332	JI1227	Vilmorins Acacia		P. sativum	cultivar				Core hunter II selection	No						Known downy mildew sensitive line	1979	Australia				https://www.seedstor.ac.uk/search-infoaccession.php?idPlant=24622
SZPS0333	JI1228	Wellensiek&#39;S Dominant		P. sativum	other	G4			PCGIN/ modern	No						Additional known downy mildew resistant line	1979	Australia				https://www.seedstor.ac.uk/search-infoaccession.php?idPlant=24623
SZPS0334	JI1229	Greenfeast		P. sativum	cultivar	G5			Core hunter II selection	No							1979	Australia				https://www.seedstor.ac.uk/search-infoaccession.php?idPlant=24624
SZPS0335	JI1231	MURFET LINE 58:ED	WBH 1792 [548]	P. sativum	other	G5			Core hunter II selection	No							1979	Australia				https://www.seedstor.ac.uk/search-infoaccession.php?idPlant=24626
SZPS0336	JI1237	SPRITE&#047;PMR		P. sativum	other	G5			Core hunter II selection	No						Known downy mildew sensitive line	1979	United States				https://www.seedstor.ac.uk/search-infoaccession.php?idPlant=24632
SZPS0337	JI1245	Snap Pea		P. sativum	cultivar	G5			Core hunter II selection	No							1979	United States				https://www.seedstor.ac.uk/search-infoaccession.php?idPlant=24640
SZPS0338	JI1246	74 1492-1		P. sativum	other				Core hunter II selection	No							1979	United States				https://www.seedstor.ac.uk/search-infoaccession.php?idPlant=24641
SZPS0339	JI1260	P.sativum-India		P. sativum	landrace	G1			Core hunter II selection	No							1979	United States	India	27.52	77.22	https://www.seedstor.ac.uk/search-infoaccession.php?idPlant=24655
SZPS0340	JI1261	P.sativum-India		P. sativum	landrace	G6			Core hunter II selection	No							1979	United States	India			https://www.seedstor.ac.uk/search-infoaccession.php?idPlant=24656
SZPS0341	JI1263	P.sativum-India		P. sativum	landrace	G1			Core hunter II selection	No							1969	United States	India	28.02	78.17	https://www.seedstor.ac.uk/search-infoaccession.php?idPlant=24658
SZPS0342	JI1265	P.sativum-India		P. sativum	landrace	G1			Core hunter II selection	No							1979	United States	India	28.22	78.22	https://www.seedstor.ac.uk/search-infoaccession.php?idPlant=24660
SZPS0343	JI1266	P.sativum-India		P. sativum	landrace	G1			Core hunter II selection	No							1979	United States	India	22.86	74.63	https://www.seedstor.ac.uk/search-infoaccession.php?idPlant=24661
SZPS0344	JI1268	P.sativum-India		P. sativum	landrace	G6			Core hunter II selection	No							1979	United States	India			https://www.seedstor.ac.uk/search-infoaccession.php?idPlant=24663
SZPS0345	JI1269	P.sativum-India		P. sativum	landrace	G6			Core hunter II selection	No							1979	United States	India	25.18	79.53	https://www.seedstor.ac.uk/search-infoaccession.php?idPlant=24664
SZPS0346	JI1270	P.sativum-India		P. sativum	landrace	G6			Core hunter II selection	No							1979	United States	India	25.18	85.51	https://www.seedstor.ac.uk/search-infoaccession.php?idPlant=24665
SZPS0347	JI1272	Katinka		P. sativum	cultivar	G5			PCGIN/ modern	No						Additional known downy mildew resistant line	1979	Netherlands				https://www.seedstor.ac.uk/search-infoaccession.php?idPlant=24667
SZPS0348	JI1277	Asterix		P. sativum	cultivar	G5			Core hunter II selection	No							1979	United Kingdom				https://www.seedstor.ac.uk/search-infoaccession.php?idPlant=24672
SZPS0349	JI1280	Cadre		P. sativum	cultivar	G5			Core hunter II selection	No							1979	United Kingdom				https://www.seedstor.ac.uk/search-infoaccession.php?idPlant=24675
SZPS0350	JI1282	Cascade		P. sativum	cultivar	G5			Core hunter II selection	No							1979	United Kingdom				https://www.seedstor.ac.uk/search-infoaccession.php?idPlant=24677
SZPS0351	JI1294	Fek		P. sativum	cultivar	G5			Core hunter II selection	No							1979	United Kingdom				https://www.seedstor.ac.uk/search-infoaccession.php?idPlant=24689
SZPS0352	JI1303	Kelpro		P. sativum	cultivar	G5			Core hunter II selection	No							1979	United Kingdom				https://www.seedstor.ac.uk/search-infoaccession.php?idPlant=24698
SZPS0353	JI1307	Marathon	Marathon Maple	P. sativum	cultivar	G3			Core hunter II selection	No							1979	United Kingdom				https://www.seedstor.ac.uk/search-infoaccession.php?idPlant=24702
SZPS0354	JI1313	Nuwonder		P. sativum	cultivar	G5			Core hunter II selection	No							1979	United Kingdom				https://www.seedstor.ac.uk/search-infoaccession.php?idPlant=24708
SZPS0355	JI1344	P.sativum-Hindukusch		P. sativum	landrace	G2			Core hunter II selection	No							1979	Sweden	India			https://www.seedstor.ac.uk/search-infoaccession.php?idPlant=24739
SZPS0356	JI1345	P.sativum-Mongolia	M 17, PIS1162 [547]	P. sativum	landrace	G3				No						JI1345 (PA2 null, genomic arrangement questions unanswered) (was duplicated)	1979	Sweden	Mongolia	48.14	91.55	https://www.seedstor.ac.uk/search-infoaccession.php?idPlant=24740
SZPS0357	JI1366	P.sativum-India		P. sativum	landrace	G1			Core hunter II selection	No							1981	United States	India	29.1	75.43	https://www.seedstor.ac.uk/search-infoaccession.php?idPlant=24761
SZPS0358	JI1386	Extra Rapid Rogue		P. sativum	other	G4	JI61	JI61	PCGIN/ modern	No						JI1386 (Rogue of JI61)	1981	United Kingdom				https://www.seedstor.ac.uk/search-infoaccession.php?idPlant=24781
SZPS0359	JI1395	Tendrilled Acacia-Uni &lt; Tac		P. sativum	other	G2			Core hunter II selection	yes	P-1295		Uni-tacB	Repr			1981	India				https://www.seedstor.ac.uk/search-infoaccession.php?idPlant=24790
SZPS0360	JI1398	P.sativum		P. sativum	other wild				Core hunter II selection	No							1981	United Kingdom	China	29.3	101	https://www.seedstor.ac.uk/search-infoaccession.php?idPlant=24793
SZPS0361	JI1407	X78124-sbm&#047;GARFIELD		P. sativum	other				Core hunter II selection	No							1981	United States				https://www.seedstor.ac.uk/search-infoaccession.php?idPlant=24801
SZPS0362	JI1423	VR74-410-2		P. sativum	other	G5			Core hunter II selection	No							1982	United States				https://www.seedstor.ac.uk/search-infoaccession.php?idPlant=24817
SZPS0363	JI1434	P.sativum-Ethiopia		P. sativum	landrace	G1			Core hunter II selection	No							1982	Sweden	Ethiopia			https://www.seedstor.ac.uk/search-infoaccession.php?idPlant=24828
SZPS0364	JI1444	P.sativum-Ethiopia		P. sativum	landrace				Core hunter II selection	No							1982	Sweden	Ethiopia			https://www.seedstor.ac.uk/search-infoaccession.php?idPlant=24838
SZPS0365	JI1453	P.sativum-Ethiopia		P. sativum	landrace	G1			Core hunter II selection	No							1982	Sweden	Ethiopia	9.19	42.07	https://www.seedstor.ac.uk/search-infoaccession.php?idPlant=24847
SZPS0366	JI1462	P.sativum-Ethiopia		P. sativum	landrace	G1			Core hunter II selection	No							1982	Sweden	Ethiopia			https://www.seedstor.ac.uk/search-infoaccession.php?idPlant=24856
SZPS0367	JI1464	P.sativum-Ethiopia		P. sativum	landrace	G1			Core hunter II selection	No							1982	Sweden	Ethiopia	6.35	38.36	https://www.seedstor.ac.uk/search-infoaccession.php?idPlant=24858
SZPS0368	JI1469	P.sativum-Ethiopia		P. sativum	landrace	G1			Core hunter II selection	No							1982	Sweden	Ethiopia			https://www.seedstor.ac.uk/search-infoaccession.php?idPlant=24863
SZPS0369	JI1477	P.sativum-Afghanistan		P. sativum	landrace	G2			Core hunter II selection	No							1982	Sweden	Afghanistan			https://www.seedstor.ac.uk/search-infoaccession.php?idPlant=24871
SZPS0370	JI1482	P.sativum-Afghanistan		P. sativum	landrace				Core hunter II selection	No							1982	Sweden	Afghanistan			https://www.seedstor.ac.uk/search-infoaccession.php?idPlant=24876
SZPS0371	JI1486	P.sativum-Afghanistan		P. sativum	landrace	G2			Core hunter II selection	No							1982	Sweden	Afghanistan			https://www.seedstor.ac.uk/search-infoaccession.php?idPlant=24880
SZPS0372	JI1491	P.sativum-China	PIS 976 [547]	P. sativum	landrace	G6			Core hunter II selection	No							1982	Sweden	China	36.04	120.2	https://www.seedstor.ac.uk/search-infoaccession.php?idPlant=24885
SZPS0373	JI1492	P.sativum-Hindukusch	PIS 458 [547]	P. sativum	landrace	G2			Core hunter II selection	No							1982	Sweden	Afghanistan			https://www.seedstor.ac.uk/search-infoaccession.php?idPlant=24886
SZPS0374	JI1503	P.sativum-China	PIS 946 [547]	P. sativum	landrace	G2			Core hunter II selection	No							1982	Sweden	China			https://www.seedstor.ac.uk/search-infoaccession.php?idPlant=24897
SZPS0375	JI1519	P.sativum-Ethiopia	PIS 385 [547]	P. sativum	landrace	G1			Core hunter II selection	No							1982	Sweden	Ethiopia			https://www.seedstor.ac.uk/search-infoaccession.php?idPlant=24913
SZPS0376	JI1523	P.sativum-Ethiopia	PIS 117 [547]	P. sativum	landrace	G1			Core hunter II selection	No							1982	Sweden	Ethiopia			https://www.seedstor.ac.uk/search-infoaccession.php?idPlant=24917
SZPS0377	JI1524	P.sativum-Hindukusch	PIS 498 [547]	P. sativum	landrace				Core hunter II selection	No							1982	Sweden	Afghanistan			https://www.seedstor.ac.uk/search-infoaccession.php?idPlant=24918
SZPS0378	JI1528	P.sativum-Hindukusch	PIS 497 [547]	P. sativum	landrace	G2			Core hunter II selection	No							1982	Sweden	Afghanistan			https://www.seedstor.ac.uk/search-infoaccession.php?idPlant=24922
SZPS0379	JI1529	P.sativum-Ethiopia	PIS 350 [547]	P. sativum	landrace	G1			Core hunter II selection	No							1982	Sweden	Ethiopia			https://www.seedstor.ac.uk/search-infoaccession.php?idPlant=24923
SZPS0380	JI1535	P.sativum-China	PIS 925 [547]	P. sativum	landrace				Core hunter II selection	No							1982	Sweden	China	37.23	112.11	https://www.seedstor.ac.uk/search-infoaccession.php?idPlant=24929
SZPS0381	JI1538	P.sativum-Ethiopia	PIS 1225 [547]	P. sativum	landrace	G2			Core hunter II selection	No							1982	Sweden	Ethiopia			https://www.seedstor.ac.uk/search-infoaccession.php?idPlant=24932
SZPS0382	JI1539	P.sativum-China	PIS 974 [547]	P. sativum	landrace	G6			Core hunter II selection	No							1982	Sweden	China			https://www.seedstor.ac.uk/search-infoaccession.php?idPlant=24933
SZPS0383	JI1542	P.sativum-Hindukusch	PIS 492 [547]	P. sativum	landrace	G6			Core hunter II selection	No							1982	Sweden	Afghanistan			https://www.seedstor.ac.uk/search-infoaccession.php?idPlant=24936
SZPS0384	JI1543	P.sativum-Mongolia	M 74, PIS 1164 [547]	P. sativum	landrace	G6			Core hunter II selection	No							1982	Sweden	Mongolia	48.14	91.55	https://www.seedstor.ac.uk/search-infoaccession.php?idPlant=24937
SZPS0385	JI1547	P.sativum-Hindukusch	PIS 487 [547]	P. sativum	landrace	G2			Core hunter II selection	No							1982	Sweden	Afghanistan			https://www.seedstor.ac.uk/search-infoaccession.php?idPlant=24941
SZPS0386	JI1548	P.sativum-Hindukusch	PIS 490 [547]	P. sativum	landrace	G2			Core hunter II selection	No							1982	Sweden	Afghanistan			https://www.seedstor.ac.uk/search-infoaccession.php?idPlant=24942
SZPS0387	JI1555	P.sativum-China	PIS 867 [547]	P. sativum	landrace	G5			Core hunter II selection	No							1982	Sweden	China	37.23	112.11	https://www.seedstor.ac.uk/search-infoaccession.php?idPlant=24949
SZPS0388	JI1562	B277-457-1		P. sativum	other	G5			Core hunter II selection	No							1982	United States				https://www.seedstor.ac.uk/search-infoaccession.php?idPlant=24956
SZPS0389	JI1569	Swinger		P. sativum	cultivar	G5			Core hunter II selection	No							1982	United States				https://www.seedstor.ac.uk/search-infoaccession.php?idPlant=24963
SZPS0390	JI1573	Orange Pod-orp		P. sativum	other		JI2223 (Paloma)	possibly Paloma	PCGIN/ modern	yes	Wt 1263	Paloma	orp	Type	rNf and NEU	JI1573 has orange pods (orp) the corresponding WT Orp is cv Paloma. Paloma is listed twice in SeedStor as JI2223 and JI3538. These are different from each other but JI3538 is more like JI1573 orp	1982	Poland				https://www.seedstor.ac.uk/search-infoaccession.php?idPlant=24967
SZPS0391	JI1575	P.sativum-China		P. sativum	landrace	G5			Core hunter II selection	No							1982	United States	China			https://www.seedstor.ac.uk/search-infoaccession.php?idPlant=24969
SZPS0392	JI1577	Shang Tsai		P. sativum	cultivar	G5			Core hunter II selection	No							1982	United States	China			https://www.seedstor.ac.uk/search-infoaccession.php?idPlant=24971
SZPS0393	JI1578	P.sativum-China		P. sativum	landrace	G6			Core hunter II selection	No							1982	United States	China			https://www.seedstor.ac.uk/search-infoaccession.php?idPlant=24972
SZPS0394	JI1581	P.sativum-Ethiopia		P. sativum	landrace	G1			Core hunter II selection	No							1982	United States	Ethiopia			https://www.seedstor.ac.uk/search-infoaccession.php?idPlant=24975
SZPS0395	JI1585	P.sativum-Ethiopia		P. sativum	landrace	G1			Core hunter II selection	No							1982	United States	Ethiopia			https://www.seedstor.ac.uk/search-infoaccession.php?idPlant=24979
SZPS0396	JI1587	P.sativum-Ethiopia		P. sativum	landrace	G1			Core hunter II selection	No							1982	United States	Ethiopia			https://www.seedstor.ac.uk/search-infoaccession.php?idPlant=24981
SZPS0397	JI1588	P.sativum-Ethiopia		P. sativum	landrace	G1			Core hunter II selection	No							1982	United States	Ethiopia			https://www.seedstor.ac.uk/search-infoaccession.php?idPlant=24982
SZPS0398	JI1590	P.sativum-Ethiopia		P. sativum	landrace	G1			Core hunter II selection	No							1982	United States	Ethiopia			https://www.seedstor.ac.uk/search-infoaccession.php?idPlant=24984
SZPS0399	JI1592	P.sativum-Ethiopia		P. sativum	landrace	G1			Core hunter II selection	No							1982	United States	Ethiopia			https://www.seedstor.ac.uk/search-infoaccession.php?idPlant=24986
SZPS0400	JI1607	P.sativum-Ethiopia		P. sativum	landrace	G1			Core hunter II selection	No							1982	United States	Ethiopia			https://www.seedstor.ac.uk/search-infoaccession.php?idPlant=25001
SZPS0401	JI1625	P.sativum-Ethiopia		P. sativum	landrace	G2			Core hunter II selection	No							1982	United States	Ethiopia			https://www.seedstor.ac.uk/search-infoaccession.php?idPlant=25019
SZPS0402	JI1626	P.sativum-Ethiopia		P. sativum	landrace	G2			Core hunter II selection	No							1982	United States	Ethiopia			https://www.seedstor.ac.uk/search-infoaccession.php?idPlant=25020
SZPS0403	JI1636	P.sativum-Ethiopia		P. sativum	landrace				Core hunter II selection	No							1982	United States	Ethiopia			https://www.seedstor.ac.uk/search-infoaccession.php?idPlant=25030
SZPS0404	JI1639	P.sativum-Ethiopia		P. sativum	landrace				Core hunter II selection	No							1982	United States	Ethiopia			https://www.seedstor.ac.uk/search-infoaccession.php?idPlant=25033
SZPS0405	JI1652	P.sativum-Ethiopia		P. sativum	landrace	G2			Core hunter II selection	No							1982	United States	Ethiopia			https://www.seedstor.ac.uk/search-infoaccession.php?idPlant=25046
SZPS0406	JI1663	P.sativum-Ethiopia		P. sativum	landrace	G1			Core hunter II selection	No							1982	United States	Ethiopia			https://www.seedstor.ac.uk/search-infoaccession.php?idPlant=25057
SZPS0407	JI1669	P.sativum-Ethiopia		P. sativum	landrace	G2			Core hunter II selection	No							1982	United States	Ethiopia			https://www.seedstor.ac.uk/search-infoaccession.php?idPlant=25063
SZPS0408	JI1679	P.sativum-Ethiopia		P. sativum	landrace	G2			Core hunter II selection	No							1982	United States	Ethiopia			https://www.seedstor.ac.uk/search-infoaccession.php?idPlant=25073
SZPS0409	JI1698	Abyssinian	1757 [2655], Aa82, PI 269773 [290]	P. sativum	landrace	G6			Core hunter II selection	No							1982	United Kingdom				https://www.seedstor.ac.uk/search-infoaccession.php?idPlant=25092
SZPS0410	JI1699	Pusaki	1758 [2655], Aa85, PI 269775 [290]	P. sativum	cultivar				Core hunter II selection	No							1982	United Kingdom				https://www.seedstor.ac.uk/search-infoaccession.php?idPlant=25093
SZPS0411	JI1702	Khanaka	1761 [2655], Aa85, PI 269776 [290]	P. sativum	cultivar				Core hunter II selection	No							1982	United Kingdom				https://www.seedstor.ac.uk/search-infoaccession.php?idPlant=25096
SZPS0412	JI1704	P. jomardii	1764 [2655]	P. sativum ssp jomardii	other wild	G3			PCGIN/ modern	No						Additional known downy mildew resistant line	1982	United Kingdom				https://www.seedstor.ac.uk/search-infoaccession.php?idPlant=25098
SZPS0413	JI1705	P. jomardii	1765 [2655]	P. sativum ssp jomardii	other wild				PCGIN/ modern	No						Additional known downy mildew resistant line	1982	United Kingdom				https://www.seedstor.ac.uk/search-infoaccession.php?idPlant=25099
SZPS0414	JI1706	Clamart X P. elatius	1766 [2655], Aa87, PI 269777 [290]	P. sativum	other	G4			Core hunter II selection	No							1982	United Kingdom				https://www.seedstor.ac.uk/search-infoaccession.php?idPlant=25100
SZPS0415	JI1713	Gold.Straw X Mummy Bicol.	1774 [2655], Aa93, PI 269783 [290]	P. sativum	cultivar	G4			PCGIN/ modern	No						Additional known downy mildew resistant line	1982	United Kingdom				https://www.seedstor.ac.uk/search-infoaccession.php?idPlant=25107
SZPS0416	JI1714	Daisy X Purple Pod	1779 [2655]	P. sativum	other	G4			Core hunter II selection	No						Daisy x Purple Pod	1982	United Kingdom				https://www.seedstor.ac.uk/search-infoaccession.php?idPlant=25108
SZPS0417	JI1718	Brochette Round	1785 [2655], Aa100, PI 269790 [290]	P. sativum	cultivar	G3			Core hunter II selection	No							1982	United Kingdom				https://www.seedstor.ac.uk/search-infoaccession.php?idPlant=25112
SZPS0418	JI1720	Telephone Gold. Straw.	1789 [2655], Aa103, PI 269793 [290]	P. sativum	cultivar	G5			Core hunter II selection	No							1982	United Kingdom				https://www.seedstor.ac.uk/search-infoaccession.php?idPlant=25114
SZPS0419	JI1721	Alderman Gold.Straw.	1790 [2655]	P. sativum	cultivar	G5			Core hunter II selection	No							1982	United Kingdom				https://www.seedstor.ac.uk/search-infoaccession.php?idPlant=25115
SZPS0420	JI1722	Amsterdam Gry.Erly.Capucin	1791 [2655], Aa104, PI 269794 [290]	P. sativum	cultivar	G4			Core hunter II selection	No							1982	United Kingdom				https://www.seedstor.ac.uk/search-infoaccession.php?idPlant=25116
SZPS0421	JI1724	Neapolitan	1800 [2655]	P. sativum	cultivar	G2			Core hunter II selection	No							1982	United Kingdom				https://www.seedstor.ac.uk/search-infoaccession.php?idPlant=25118
SZPS0422	JI1732	Stumpy 3 Podded 6Ft.	1830 [2655]	P. sativum	other	G5			Core hunter II selection	No							1982	United Kingdom				https://www.seedstor.ac.uk/search-infoaccession.php?idPlant=25126
SZPS0423	JI1733	Triple Podded Tall Pointd	1831 [2655]	P. sativum	cultivar	G5			Core hunter II selection	No							1982	United Kingdom				https://www.seedstor.ac.uk/search-infoaccession.php?idPlant=25127
SZPS0424	JI1735	Neapolitan	1834 [2655]	P. sativum	cultivar				Core hunter II selection	No							1982	United Kingdom				https://www.seedstor.ac.uk/search-infoaccession.php?idPlant=25129
SZPS0425	JI1737	C481-392-4:sbm-wlo		P. sativum	other				Core hunter II selection	No							1982	United States				https://www.seedstor.ac.uk/search-infoaccession.php?idPlant=25131
SZPS0426	JI1747	Almires		P. sativum	cultivar	G5			Core hunter II selection	No							1983	Germany				https://www.seedstor.ac.uk/search-infoaccession.php?idPlant=25140
SZPS0427	JI1748	Andes		P. sativum	landrace	G5			Core hunter II selection	No							1983	Germany				https://www.seedstor.ac.uk/search-infoaccession.php?idPlant=25141
SZPS0428	JI1762	Palla-af		P. sativum	other	G5			Core hunter II selection	No							1983	United Kingdom				https://www.seedstor.ac.uk/search-infoaccession.php?idPlant=25155
SZPS0429	JI1768	Filby-af,st	JIC/PGRO 4 [286]	P. sativum	cultivar	G5			Core hunter II selection	No							1983	United Kingdom				https://www.seedstor.ac.uk/search-infoaccession.php?idPlant=25161
SZPS0430	JI1772	Filigreen-af		P. sativum	cultivar	G5			Core hunter II selection	No							1983	Germany				https://www.seedstor.ac.uk/search-infoaccession.php?idPlant=25165
SZPS0431	JI1774	WAV 27101-af		P. sativum	other	G5			Core hunter II selection	No							1983	Germany				https://www.seedstor.ac.uk/search-infoaccession.php?idPlant=25167
SZPS0432	JI1775	P.sativum-Chile		P. sativum	landrace	G5			Core hunter II selection	No							1983	United Kingdom	Chile			https://www.seedstor.ac.uk/search-infoaccession.php?idPlant=25168
SZPS0433	JI1791	P.sativum-Nepal		P. sativum	landrace				Core hunter II selection	No							1983	India	Nepal			https://www.seedstor.ac.uk/search-infoaccession.php?idPlant=25184
SZPS0434	JI1792	P.sativum-Nepal		P. sativum	landrace	G2			Core hunter II selection	No						p or v - uncharacterised Mendelian locus	1983	India	Nepal			https://www.seedstor.ac.uk/search-infoaccession.php?idPlant=25185
SZPS0435	JI1793	P.sativum		P. sativum	other	G3			Core hunter II selection	No						p or v - uncharacterised Mendelian locus	1983	Israel	Israel			https://www.seedstor.ac.uk/search-infoaccession.php?idPlant=25186
SZPS0436	JI1800	HJA 51616		P. sativum	other	G5			Core hunter II selection	No							1983	Finland				https://www.seedstor.ac.uk/search-infoaccession.php?idPlant=25193
SZPS0437	JI1804	Osmo		P. sativum	cultivar				Core hunter II selection	No							1983	Finland				https://www.seedstor.ac.uk/search-infoaccession.php?idPlant=25197
SZPS0438	JI1816	HJA 51893-af		P. sativum	other	G5			Core hunter II selection	No							1983	Finland				https://www.seedstor.ac.uk/search-infoaccession.php?idPlant=25209
SZPS0439	JI1817	HJA 51902-af		P. sativum	other	G5			Core hunter II selection	No							1983	Finland				https://www.seedstor.ac.uk/search-infoaccession.php?idPlant=25210
SZPS0440	JI1822	Multipod Parent		P. sativum	cultivar	G5			Core hunter II selection	No							1983	United States				https://www.seedstor.ac.uk/search-infoaccession.php?idPlant=25215
SZPS0441	JI1825	P.sativum-Spain		P. sativum	landrace	G2			Core hunter II selection	No							1983	Spain	Spain			https://www.seedstor.ac.uk/search-infoaccession.php?idPlant=25218
SZPS0442	JI1829	Negrer		P. sativum	landrace	G5			Core hunter II selection	No							1983	Spain	Spain	37.59	-1.07	https://www.seedstor.ac.uk/search-infoaccession.php?idPlant=25222
SZPS0443	JI1834	Chicharo		P. sativum	landrace	G2			Core hunter II selection	No							1983	Spain	Spain	37.15	-6.57	https://www.seedstor.ac.uk/search-infoaccession.php?idPlant=25227
SZPS0444	JI1835	Chichare		P. sativum	landrace				Core hunter II selection	No							1983	Spain	Spain			https://www.seedstor.ac.uk/search-infoaccession.php?idPlant=25228
SZPS0445	JI1837	Arvello		P. sativum	landrace				Core hunter II selection	No							1983	Spain	Spain	43.22	-5.5	https://www.seedstor.ac.uk/search-infoaccession.php?idPlant=25230
SZPS0446	JI1846	P.sativum Var. Hibernicum	1122, PIS 415 [547]	P. sativum	other wild				Core hunter II selection	No							1983	New Zealand	Greece			https://www.seedstor.ac.uk/search-infoaccession.php?idPlant=25239
SZPS0447	JI1848	Timperley Wonder		P. sativum	cultivar				Core hunter II selection	No							1983	New Zealand				https://www.seedstor.ac.uk/search-infoaccession.php?idPlant=25241
SZPS0448	JI1850	Selectas Peluske	PIS 664/60	P. sativum	cultivar				Core hunter II selection	No							1983	New Zealand	Germany			https://www.seedstor.ac.uk/search-infoaccession.php?idPlant=25243
SZPS0449	JI1851	Clamart X Elatius	Aa87, P.9	P. sativum	other	G3			Core hunter II selection	No							1983	New Zealand	United Kingdom			https://www.seedstor.ac.uk/search-infoaccession.php?idPlant=25244
SZPS0450	JI1863	P.sativum		P. sativum	other				Core hunter II selection	No						p or v - uncharacterised Mendelian locus	1983	Sweden				https://www.seedstor.ac.uk/search-infoaccession.php?idPlant=25256
SZPS0451	JI1865	P.sativum		P. sativum	other	G4			Core hunter II selection	No						p or v - uncharacterised Mendelian locus	1983	Sweden				https://www.seedstor.ac.uk/search-infoaccession.php?idPlant=25258
SZPS0452	JI1870	P.sativum		P. sativum	other	G3			Core hunter II selection	No							1983	Sweden				https://www.seedstor.ac.uk/search-infoaccession.php?idPlant=25263
SZPS0453	JI1882	P.sativum-Ethiopia		P. sativum	landrace				Core hunter II selection	No							1983	United States	Ethiopia			https://www.seedstor.ac.uk/search-infoaccession.php?idPlant=25275
SZPS0454	JI1885	P.sativum-Ethiopia		P. sativum	landrace	G2			Core hunter II selection	No							1983	United States	Ethiopia			https://www.seedstor.ac.uk/search-infoaccession.php?idPlant=25278
SZPS0455	JI1891	P.sativum-Ethiopia		P. sativum	landrace	G2			Core hunter II selection	No							1983	United States	Ethiopia			https://www.seedstor.ac.uk/search-infoaccession.php?idPlant=25284
SZPS0456	JI1894	P.sativum-Ethiopia		P. sativum	landrace	G2			Core hunter II selection	No							1983	United States	Ethiopia			https://www.seedstor.ac.uk/search-infoaccession.php?idPlant=25287
SZPS0457	JI1900	P.sativum-Ethiopia		P. sativum	landrace	G2			Core hunter II selection	No						p or v - uncharacterised Mendelian locus	1983	United States	Ethiopia			https://www.seedstor.ac.uk/search-infoaccession.php?idPlant=25293
SZPS0458	JI1910	P.sativum-Ethiopia		P. sativum	landrace	G2			Core hunter II selection	No							1983	United States	Ethiopia			https://www.seedstor.ac.uk/search-infoaccession.php?idPlant=25303
SZPS0459	JI1911	P.sativum-Ethiopia		P. sativum	landrace	G2			Core hunter II selection	No							1983	United States	Ethiopia			https://www.seedstor.ac.uk/search-infoaccession.php?idPlant=25304
SZPS0460	JI1915	P.sativum-Ethiopia		P. sativum	landrace				Core hunter II selection	No							1983	United States	Ethiopia			https://www.seedstor.ac.uk/search-infoaccession.php?idPlant=25308
SZPS0461	JI1919	P.sativum-Ethiopia		P. sativum	landrace	G2			Core hunter II selection	No							1983	United States	Ethiopia			https://www.seedstor.ac.uk/search-infoaccession.php?idPlant=25312
SZPS0462	JI1920	P.sativum-Ethiopia		P. sativum	landrace	G2			Core hunter II selection	No							1983	United States	Ethiopia			https://www.seedstor.ac.uk/search-infoaccession.php?idPlant=25313
SZPS0463	JI1921	P.sativum-Ethiopia		P. sativum	landrace	G2			Core hunter II selection	No						p or v - uncharacterised Mendelian locus	1983	United States	Ethiopia			https://www.seedstor.ac.uk/search-infoaccession.php?idPlant=25314
SZPS0464	JI1922	Pai Wan Tou		P. sativum	landrace				Core hunter II selection	No							1983	United States	China			https://www.seedstor.ac.uk/search-infoaccession.php?idPlant=25315
SZPS0465	JI1933	P.sativum-Ethiopia		P. sativum	landrace	G2			Core hunter II selection	No							1983	United States	Ethiopia			https://www.seedstor.ac.uk/search-infoaccession.php?idPlant=25326
SZPS0466	JI1946	P.sativum-Ethiopia		P. sativum	landrace	G1			Core hunter II selection	No							1983	United States	Ethiopia			https://www.seedstor.ac.uk/search-infoaccession.php?idPlant=25339
SZPS0467	JI1947	P.sativum-Ethiopia		P. sativum	landrace	G1			Core hunter II selection	No							1983	United States	Ethiopia			https://www.seedstor.ac.uk/search-infoaccession.php?idPlant=25340
SZPS0468	JI1948	P.sativum-Ethiopia		P. sativum	landrace	G1			Core hunter II selection	No							1983	United States	Ethiopia			https://www.seedstor.ac.uk/search-infoaccession.php?idPlant=25341
SZPS0469	JI1956	P.sativum-Afghanistan	VIR 1881	P. sativum	landrace	G6			Core hunter II selection	No							1983	United States	Afghanistan			https://www.seedstor.ac.uk/search-infoaccession.php?idPlant=25349
SZPS0470	JI1962	P.sativum-Ethiopia		P. sativum	landrace	G2			Core hunter II selection	No							1983	United States	Ethiopia			https://www.seedstor.ac.uk/search-infoaccession.php?idPlant=25355
SZPS0471	JI1967	P.sativum-Ethiopia		P. sativum	landrace	G1			Core hunter II selection	No							1983	United States	Ethiopia			https://www.seedstor.ac.uk/search-infoaccession.php?idPlant=25360
SZPS0472	JI1968	P.sativum-Ethiopia		P. sativum	landrace	G2			Core hunter II selection	No							1983	United States	Ethiopia			https://www.seedstor.ac.uk/search-infoaccession.php?idPlant=25361
SZPS0473	JI1971	P.sativum-Ethiopia		P. sativum	landrace	G2			Core hunter II selection	No							1983	United States	Ethiopia			https://www.seedstor.ac.uk/search-infoaccession.php?idPlant=25364
SZPS0474	JI1980	P.sativum-China		P. sativum	landrace				Core hunter II selection	No							1983	United States	China			https://www.seedstor.ac.uk/search-infoaccession.php?idPlant=25373
SZPS0475	JI1981	P.sativum-India		P. sativum	landrace	G2			Core hunter II selection	No							1983	United States	India	29.5	79.3	https://www.seedstor.ac.uk/search-infoaccession.php?idPlant=25374
SZPS0476	JI1985	P.sativum-Ethiopia		P. sativum	landrace	G1			Core hunter II selection	No							1983	United States	Ethiopia			https://www.seedstor.ac.uk/search-infoaccession.php?idPlant=25378
SZPS0477	JI1989	P.sativum-Ethiopia		P. sativum	landrace	G1			Core hunter II selection	No							1983	United States	Ethiopia			https://www.seedstor.ac.uk/search-infoaccession.php?idPlant=25382
SZPS0478	JI1991	P.sativum-Ethiopia		P. sativum	landrace	G1			Core hunter II selection	No							1983	United States	Ethiopia			https://www.seedstor.ac.uk/search-infoaccession.php?idPlant=25384
SZPS0479	JI1995	P.sativum-Ethiopia		P. sativum	landrace	G2			Core hunter II selection	No							1983	United States	Ethiopia			https://www.seedstor.ac.uk/search-infoaccession.php?idPlant=25388
SZPS0480	JI1996	P.sativum-Ethiopia		P. sativum	landrace	G1			Core hunter II selection	No							1983	United States	Ethiopia			https://www.seedstor.ac.uk/search-infoaccession.php?idPlant=25389
SZPS0481	JI2001	P.sativum-Ethiopia		P. sativum	landrace	G1			Core hunter II selection	No							1983	United States	Ethiopia			https://www.seedstor.ac.uk/search-infoaccession.php?idPlant=25394
SZPS0482	JI2007	Mercurio		P. sativum	cultivar	G5			Core hunter II selection	No							1983	Netherlands				https://www.seedstor.ac.uk/search-infoaccession.php?idPlant=25400
SZPS0483	JI2016	B777-188:af,sil		P. sativum	other	G5			Core hunter II selection	No			sil, af	Repr		JI2016 af sil	1984	United States				https://www.seedstor.ac.uk/search-infoaccession.php?idPlant=25409
SZPS0484	JI2017	B777-188:Af,sil		P. sativum	other	G5			PCGIN/ modern	No			sil, Af	Repr		JI2017 Af sil	1984	United States				https://www.seedstor.ac.uk/search-infoaccession.php?idPlant=25410
SZPS0485	JI2018	P.sativum-Ladakh		P. sativum	landrace	G6			Core hunter II selection	No							1984	United Kingdom	India	33.32	76.59	https://www.seedstor.ac.uk/search-infoaccession.php?idPlant=25411
SZPS0486	JI2036	Pika		P. sativum	cultivar	G5			Core hunter II selection	No							1984	Finland				https://www.seedstor.ac.uk/search-infoaccession.php?idPlant=25425
SZPS0487	JI2048	Catrico-SSCO		P. sativum	cultivar				Core hunter II selection	No							1984	Chile				https://www.seedstor.ac.uk/search-infoaccession.php?idPlant=25437
SZPS0488	JI2058	POL 8:af		P. sativum	other	G3			Core hunter II selection	No							1978	Poland				https://www.seedstor.ac.uk/search-infoaccession.php?idPlant=25447
SZPS0489	JI2061	POL 11:af		P. sativum	other	G3			Core hunter II selection	No							1978	Poland				https://www.seedstor.ac.uk/search-infoaccession.php?idPlant=25450
SZPS0490	JI2081	P.sativum		P. sativum	other				Core hunter II selection	No							1985	Italy				https://www.seedstor.ac.uk/search-infoaccession.php?idPlant=25470
SZPS0491	JI2083	P.sativum		P. sativum	other				Core hunter II selection	No							1985	Italy				https://www.seedstor.ac.uk/search-infoaccession.php?idPlant=25472
SZPS0492	JI2084	P.sativum		P. sativum	other	G5			Core hunter II selection	No							1985	Italy				https://www.seedstor.ac.uk/search-infoaccession.php?idPlant=25473
SZPS0493	JI2089	P.sativum		P. sativum	other	G2			Core hunter II selection	No							1985	Italy				https://www.seedstor.ac.uk/search-infoaccession.php?idPlant=25478
SZPS0494	JI2100	P.sativum		P. sativum	other				Core hunter II selection	No							1985	Italy				https://www.seedstor.ac.uk/search-infoaccession.php?idPlant=25489
SZPS0495	JI2104	P.sativum-Ethiopia		P. sativum	landrace	G2			Core hunter II selection	No							1985	Italy				https://www.seedstor.ac.uk/search-infoaccession.php?idPlant=25493
SZPS0496	JI2105	P.sativum	PI227258	P. sativum	other wild				Core hunter II selection	No							1985	Italy	Iran	32.659	51.671	https://www.seedstor.ac.uk/search-infoaccession.php?idPlant=25494
SZPS0497	JI2106	P.sativum		P. sativum	other	G5			Core hunter II selection	No							1985	Italy				https://www.seedstor.ac.uk/search-infoaccession.php?idPlant=25495
SZPS0498	JI2108	Ace		P. sativum	cultivar	G5			Core hunter II selection	No							1985	United Kingdom				https://www.seedstor.ac.uk/search-infoaccession.php?idPlant=25497
SZPS0499	JI2110	Kebby		P. sativum	cultivar	G5	Kebby		PCGIN/ modern	yes	Kebby		rc	Type		CV Kebby (JI2110 - interesting seed shape)	1985	United Kingdom				https://www.seedstor.ac.uk/search-infoaccession.php?idPlant=25499
SZPS0500	JI2114	WR-1167		P. sativum	other	G5			Core hunter II selection	No							1985	United States				https://www.seedstor.ac.uk/search-infoaccession.php?idPlant=25503
SZPS0501	JI2116	P.Speciosum	M872	P. sativum	other wild	G2			Core hunter II selection	No							1985	Germany	Spain	38.07	-6.31	https://www.seedstor.ac.uk/search-infoaccession.php?idPlant=25505
SZPS0502	JI2126	P.sativum Waterlooensis	M 959	P. sativum	other wild	G2			Core hunter II selection	No							1986	Germany	Spain			https://www.seedstor.ac.uk/search-infoaccession.php?idPlant=25515
SZPS0503	JI2129	P.Speciosum	M963	P. sativum	other wild	G2			Core hunter II selection	No							1985	Germany	Spain	38.07	-6.31	https://www.seedstor.ac.uk/search-infoaccession.php?idPlant=25518
SZPS0504	JI2134	P.Speciosum	M965	P. sativum	other wild	G2			Core hunter II selection	No							1985	Germany	Spain			https://www.seedstor.ac.uk/search-infoaccession.php?idPlant=25523
SZPS0505	JI2149	P.sativum Superfluens	M1223	P. sativum	other	G2			Core hunter II selection	No							1985	Germany	Spain			https://www.seedstor.ac.uk/search-infoaccession.php?idPlant=25538
SZPS0506	JI2150	P.sativum Waterlooensis	M879	P. sativum	other wild	G2			Core hunter II selection	No							1985	Germany	Spain	40.04	-2.03	https://www.seedstor.ac.uk/search-infoaccession.php?idPlant=25539
SZPS0507	JI2152	P.Speciosum	M974	P. sativum	other wild	G2			Core hunter II selection	No							1985	Germany	Spain			https://www.seedstor.ac.uk/search-infoaccession.php?idPlant=25541
SZPS0508	JI2153	P.Speciosum	M975	P. sativum	other wild	G2			Core hunter II selection	No							1985	Germany	Spain			https://www.seedstor.ac.uk/search-infoaccession.php?idPlant=25542
SZPS0509	JI2154	P.Speciosum	M877	P. sativum	other wild	G2			Core hunter II selection	No							1985	Germany	Spain	40.04	-2.03	https://www.seedstor.ac.uk/search-infoaccession.php?idPlant=25543
SZPS0510	JI2156	P.Speciosum	M878	P. sativum	other wild	G2			Core hunter II selection	No							1985	Germany	Spain	40.04	-2.03	https://www.seedstor.ac.uk/search-infoaccession.php?idPlant=25545
SZPS0511	JI2157	P.Speciosum	M976	P. sativum	other wild	G2			Core hunter II selection	No							1985	Germany	Spain			https://www.seedstor.ac.uk/search-infoaccession.php?idPlant=25546
SZPS0512	JI2160	Stipula-Imminuata-stim		P. sativum	other	G2			Core hunter II selection	No							1986	Sweden				https://www.seedstor.ac.uk/search-infoaccession.php?idPlant=25549
SZPS0513	JI2174	Calyx Carpellaris-cc		P. sativum	other	G5	DGV		Core hunter II selection	yes	G 1B	DGV	cc	Type	X-ray	Dippes Gelbe Viktoria is a line in which Gottschalk did most of his mutagenesis	1986	Sweden				https://www.seedstor.ac.uk/search-infoaccession.php?idPlant=25563
SZPS0514	JI2177	Corrugatus-foe,Type L.		P. sativum	other				Core hunter II selection	No							1986	Sweden				https://www.seedstor.ac.uk/search-infoaccession.php?idPlant=25566
SZPS0515	JI2182	Tendrilled Acacia-Uni &lt; tac	P-753, WBH 5876 [203]	P. sativum	other	G5			Core hunter II selection	No							1986	Poland				https://www.seedstor.ac.uk/search-infoaccession.php?idPlant=25571
SZPS0516	JI2193	Ciflik-5		P. sativum	other				Core hunter II selection	No							1986	Russia	Bulgaria			https://www.seedstor.ac.uk/search-infoaccession.php?idPlant=25582
SZPS0517	JI2217	Powdery Mildew Resistant		P. sativum	other	G1			Core hunter II selection	No							1983	United Kingdom				https://www.seedstor.ac.uk/search-infoaccession.php?idPlant=25606
SZPS0518	JI2219	GP 34		P. sativum	other	G5			Core hunter II selection	No							1987	United States				https://www.seedstor.ac.uk/search-infoaccession.php?idPlant=25608
SZPS0519	JI2221	GP 36		P. sativum	other	G5			Core hunter II selection	No							1987	United States				https://www.seedstor.ac.uk/search-infoaccession.php?idPlant=25610
SZPS0520	JI2223	Paloma		P. sativum	cultivar	G3	JI2223 (Paloma)	Paloma		yes	Paloma		Coch	Repr		WT for orp mutant line JI 1573. Paloma is listed twice in SeedStor as JI2223 and JI3538. These are different from each other but JI3538 is more like JI1573 orp	1987	Sweden				https://www.seedstor.ac.uk/search-infoaccession.php?idPlant=25612
SZPS0521	JI2228	Iregi P3		P. sativum	other	G5			Core hunter II selection	No							1987	Sweden				https://www.seedstor.ac.uk/search-infoaccession.php?idPlant=25617
SZPS0522	JI2233	Chishminskii		P. sativum	cultivar				Core hunter II selection	No							1987	Sweden				https://www.seedstor.ac.uk/search-infoaccession.php?idPlant=25622
SZPS0523	JI2236	Purple Testa Selection		P. sativum	other	G2			Core hunter II selection	No							1987	United Kingdom				https://www.seedstor.ac.uk/search-infoaccession.php?idPlant=25625
SZPS0524	JI2240	Express Dioseckij 596		P. sativum	cultivar	G5			Core hunter II selection	No							1987	Russia				https://www.seedstor.ac.uk/search-infoaccession.php?idPlant=25629
SZPS0525	JI2243	Ramonskii 77		P. sativum	other	G3	Ramonsky 77		Core hunter II selection	yes	Ramonsky 77		Nod4	Type			1987	Russia				https://www.seedstor.ac.uk/search-infoaccession.php?idPlant=25632
SZPS0526	JI2257	Ternopol Local		P. sativum	cultivar				Core hunter II selection	No							1987	Russia				https://www.seedstor.ac.uk/search-infoaccession.php?idPlant=25646
SZPS0527	JI2262	Kreuzungs Nachr		P. sativum	cultivar	G4			Core hunter II selection	No							1987	Germany				https://www.seedstor.ac.uk/search-infoaccession.php?idPlant=25651
SZPS0528	JI2273	Orlex		P. sativum	cultivar				Core hunter II selection	No						gp mutant p or v - uncharacterised Mendelian loci. Yellow pods confirmed 2019/2020	1987	United Kingdom				https://www.seedstor.ac.uk/search-infoaccession.php?idPlant=25662
SZPS0529	JI2274	Flavanda		P. sativum	cultivar				Core hunter II selection	No							1987	United Kingdom				https://www.seedstor.ac.uk/search-infoaccession.php?idPlant=25663
SZPS0530	JI2277	Knesha N49		P. sativum	other				Core hunter II selection	No							1987	Bulgaria				https://www.seedstor.ac.uk/search-infoaccession.php?idPlant=25666
SZPS0531	JI2279	Pleven 10		P. sativum	other				Core hunter II selection	No							1987	Bulgaria				https://www.seedstor.ac.uk/search-infoaccession.php?idPlant=25668
SZPS0532	JI2294	Old Unknown Uk Cv.		P. sativum	landrace	G5			Core hunter II selection	No							1987	United Kingdom				https://www.seedstor.ac.uk/search-infoaccession.php?idPlant=25683
SZPS0533	JI2296	Elektron		P. sativum	cultivar	G5			Core hunter II selection	No							1988	Poland				https://www.seedstor.ac.uk/search-infoaccession.php?idPlant=25685
SZPS0534	JI2300	Titan		P. sativum	cultivar	G2			Core hunter II selection	No							1988	Canada				https://www.seedstor.ac.uk/search-infoaccession.php?idPlant=25689
SZPS0535	JI2301	Mexique 4		P. sativum	cultivar	G2			Core hunter II selection	No							1988	Sweden	Mexico			https://www.seedstor.ac.uk/search-infoaccession.php?idPlant=25690
SZPS0536	JI2311	77-259	B77-259 [2646]	P. sativum	other	G2			Core hunter II selection	No							1988	Sweden				https://www.seedstor.ac.uk/search-infoaccession.php?idPlant=25700
SZPS0537	JI2312	77-276	B77-276 [2646]	P. sativum	other	G2			Core hunter II selection	No							1988	Sweden				https://www.seedstor.ac.uk/search-infoaccession.php?idPlant=25701
SZPS0538	JI2314	FN1-nof1(fix-)		P. sativum	other		?Rondo		Core hunter II selection	yes	FN1	Rondo nod-3	nof1 nod3	Type	EMS	In Seed Stor JI2313 is listed as nod-3 (a mutant in the Rondo background) not JI2314 as listed in PGene	1988	Netherlands				https://www.seedstor.ac.uk/search-infoaccession.php?idPlant=25703
SZPS0539	JI2317	Me Stop Mutant 12823		P. sativum	cultivar	G5			Core hunter II selection	No							1988	Germany				https://www.seedstor.ac.uk/search-infoaccession.php?idPlant=25706
SZPS0540	JI2321	Solara		P. sativum	cultivar	G5	Solara			yes	Solara	-	Pcd1	Type	wild type	cv Solara (PCGIN line of interest)	1988	United Kingdom				https://www.seedstor.ac.uk/search-infoaccession.php?idPlant=25710
SZPS0541	JI2324	Bohatyr		P. sativum	cultivar	G5			Core hunter II selection	No							1988	United Kingdom				https://www.seedstor.ac.uk/search-infoaccession.php?idPlant=25713
SZPS0542	JI2329	Progreta		P. sativum	cultivar		JI0516	JI0516	PCGIN/ modern	No						JI2329 Progreta (a Rogue selected from Maro)	1988	United Kingdom				https://www.seedstor.ac.uk/search-infoaccession.php?idPlant=25718
SZPS0543	JI2331	Chlorotica-chi		P. sativum	other	G3			Core hunter II selection	yes	WL 564		chi18	Type			1988	Sweden				https://www.seedstor.ac.uk/search-infoaccession.php?idPlant=25720
SZPS0544	JI2332	Lamprechts L 379	L 379	P. sativum	other	G3			PCGIN/ modern	No						JI2332 (T4/7 very unusual two NORs on one chromosome)	1988	Sweden				https://www.seedstor.ac.uk/search-infoaccession.php?idPlant=25721
SZPS0545	JI2344	You Yan Bai		P. sativum	cultivar				Core hunter II selection	No							1988	Chile	China			https://www.seedstor.ac.uk/search-infoaccession.php?idPlant=25733
SZPS0546	JI2345	Bai Wan Dou 034		P. sativum	landrace				Core hunter II selection	No							1988	Chile	China			https://www.seedstor.ac.uk/search-infoaccession.php?idPlant=25734
SZPS0547	JI2348	Bai Wan Dou		P. sativum	landrace				Core hunter II selection	No							1988	Chile	China			https://www.seedstor.ac.uk/search-infoaccession.php?idPlant=25737
SZPS0548	JI2349	Da Bai Wan Dou 159		P. sativum	landrace	G2			Core hunter II selection	No							1988	Chile	China			https://www.seedstor.ac.uk/search-infoaccession.php?idPlant=25738
SZPS0549	JI2350	Da Wan Dou		P. sativum	landrace				Core hunter II selection	No							1988	Chile	China			https://www.seedstor.ac.uk/search-infoaccession.php?idPlant=25739
SZPS0550	JI2353	Da Bai Wan Dou 122		P. sativum	landrace	G2			Core hunter II selection	No							1988	Chile				https://www.seedstor.ac.uk/search-infoaccession.php?idPlant=25742
SZPS0551	JI2355	P.sativum-Nepal		P. sativum	landrace	G1			Core hunter II selection	No							1988	Nepal	Nepal	26.59	87.2	https://www.seedstor.ac.uk/search-infoaccession.php?idPlant=25744
SZPS0552	JI2366	Nain Mangetout Beurre		P. sativum	cultivar				PCGIN/ modern	No						JI2366 is Dwarf Nain Buerre. It has yellow pods and is confirmed as gp.	1988	United Kingdom				https://www.seedstor.ac.uk/search-infoaccession.php?idPlant=25755
SZPS0553	JI2371	Lud Rogue		P. sativum	other	G5			PCGIN/ modern	No						Additional known downy mildew resistant line	1987	United Kingdom				https://www.seedstor.ac.uk/search-infoaccession.php?idPlant=25760
SZPS0554	JI2374	Mini		P. sativum	cultivar	G5			Core hunter II selection	No							1988	United States				https://www.seedstor.ac.uk/search-infoaccession.php?idPlant=25763
SZPS0555	JI2389	PEMV-8		P. sativum	other	G5			Core hunter II selection	yes	PEMV-8		En	Repr			1988	United States				https://www.seedstor.ac.uk/search-infoaccession.php?idPlant=25778
SZPS0556	JI2393	86-2231		P. sativum	other	G5			Core hunter II selection	No							1988	United States				https://www.seedstor.ac.uk/search-infoaccession.php?idPlant=25782
SZPS0557	JI2394	86-2236		P. sativum	other	G3			Core hunter II selection	No							1988	United States				https://www.seedstor.ac.uk/search-infoaccession.php?idPlant=25783
SZPS0558	JI2401	Fit		P. sativum	cultivar	G5			Core hunter II selection	No							1988	United Kingdom				https://www.seedstor.ac.uk/search-infoaccession.php?idPlant=25790
SZPS0559	JI2402	Henriette		P. sativum	cultivar	G5			Core hunter II selection	No							1988	United Kingdom				https://www.seedstor.ac.uk/search-infoaccession.php?idPlant=25791
SZPS0560	JI2403	Carat		P. sativum	cultivar	G5			Core hunter II selection	No							1988	United Kingdom				https://www.seedstor.ac.uk/search-infoaccession.php?idPlant=25792
SZPS0561	JI2410	Conway		P. sativum	cultivar	G5			Core hunter II selection	No							1989	United States				https://www.seedstor.ac.uk/search-infoaccession.php?idPlant=25799
SZPS0562	JI2423	P.sativum arvense	L 180	P. sativum	landrace				Core hunter II selection	yes	WL 18		A1	Repr			1989	Sweden	Hungary			https://www.seedstor.ac.uk/search-infoaccession.php?idPlant=25811
SZPS0563	JI2429	WBH 1753	L 1418	P. sativum	other	G6			Core hunter II selection	yes	WL 1753		M a	Repr			1989	Sweden				https://www.seedstor.ac.uk/search-infoaccession.php?idPlant=25817
SZPS0564	JI2434	Puget		P. sativum	cultivar	G5			Core hunter II selection	No							1989	United Kingdom				https://www.seedstor.ac.uk/search-infoaccession.php?idPlant=25822
SZPS0565	JI2436	Vinco		P. sativum	cultivar	G4	JI2436	JI2436	PCGIN/ modern	No						JI2436 (cv Vinco see JI813 above)	1989	United Kingdom				https://www.seedstor.ac.uk/search-infoaccession.php?idPlant=25824
SZPS0566	JI2464	OSU 559-29		P. sativum	other wild/other	G5			Core hunter II selection	No							1990	United States				https://www.seedstor.ac.uk/search-infoaccession.php?idPlant=25852
SZPS0567	JI2500	Bornella		P. sativum	cultivar	G5			Core hunter II selection	No							1991	Germany				https://www.seedstor.ac.uk/search-infoaccession.php?idPlant=25888
SZPS0568	JI2501	Boretta		P. sativum	cultivar	G5			Core hunter II selection	No							1991	Germany				https://www.seedstor.ac.uk/search-infoaccession.php?idPlant=25889
SZPS0569	JI2559	P. Speciosum		P. sativum	other				Core hunter II selection	No							1991	Germany	Georgia	43.02	42.43	https://www.seedstor.ac.uk/search-infoaccession.php?idPlant=25947
SZPS0570	JI2561	P. Speciosum		P. sativum	other wild				Core hunter II selection	No							1991	Germany	Georgia	43.1	41.29	https://www.seedstor.ac.uk/search-infoaccession.php?idPlant=25949
SZPS0571	JI2583	P. Axiphium		P. sativum	other wild	G2			Core hunter II selection	No						p or v - uncharacterised Mendelian locus	1991	Germany				https://www.seedstor.ac.uk/search-infoaccession.php?idPlant=25971
SZPS0572	JI2595	P. Sativum	M 1307	P. sativum	other	G5			Core hunter II selection	No							1991	Germany	Georgia	42.06	43.03	https://www.seedstor.ac.uk/search-infoaccession.php?idPlant=25983
SZPS0573	JI2603	P. Speciosum-Libya	M 1374	P. sativum	other wild	G7			Core hunter II selection	No							1991	Germany	Libya	24.96	10.173	https://www.seedstor.ac.uk/search-infoaccession.php?idPlant=25991
SZPS0574	JI2611	3302 Line 3&#047;3		P. sativum	other				Core hunter II selection	No							1992	Russia				https://www.seedstor.ac.uk/search-infoaccession.php?idPlant=25999
SZPS0575	JI2623	Princess		P. sativum	cultivar					No						sgr line of interest	1992	United Kingdom				https://www.seedstor.ac.uk/search-infoaccession.php?idPlant=26011
SZPS0576	JI2644	P.sativum-Malawi		P. sativum	landrace	G2			Core hunter II selection	No							1993	United Kingdom				https://www.seedstor.ac.uk/search-infoaccession.php?idPlant=26032
SZPS0577	JI2659	Multi-Marker Stock 93	B 687-515	P. sativum	cultivar	G5			PCGIN/ modern	No						JI2659 has orange pods (Orp candidate gene being pursues JH). It is also a wax mutant (wb).	1993	United States				https://www.seedstor.ac.uk/search-infoaccession.php?idPlant=26047
SZPS0578	JI2671	Fasciated-Fas		P. sativum	other	G5	?DGV	possibly DGV	PCGIN/ modern	yes	Gottschalk 2		fas>251A	Type	X-ray	JI2671 (fas mutant -- uncharacterised Mendelian locus - would be good to identify the parental line)	1994	Germany				https://www.seedstor.ac.uk/search-infoaccession.php?idPlant=26059
SZPS0579	JI2683	Kungsart		P. sativum	cultivar				PCGIN/ modern	No						JI2683 Kungsart reference karyotype (L110)	1994	Sweden				https://www.seedstor.ac.uk/search-infoaccession.php?idPlant=26070
SZPS0580	JI2693	K.301		P. sativum	other				Core hunter II selection	No							1994	Sweden				https://www.seedstor.ac.uk/search-infoaccession.php?idPlant=26080
SZPS0581	JI2699	Latior		P. sativum	cultivar	G5			Core hunter II selection	yes	WL 168		Laf	Type			1994	Sweden				https://www.seedstor.ac.uk/search-infoaccession.php?idPlant=26086
SZPS0582	JI2707	K. 1150		P. sativum	other				Core hunter II selection	No							1994	Sweden				https://www.seedstor.ac.uk/search-infoaccession.php?idPlant=26094
SZPS0583	JI2711	K.803		P. sativum	other	G5			Core hunter II selection	yes	WL 1395		gla	Type			1994	Sweden				https://www.seedstor.ac.uk/search-infoaccession.php?idPlant=26098
SZPS0584	JI2716	K.1366		P. sativum	other				Core hunter II selection	yes	WL 1519		Olv	Type		gp, yellow pods confirmed 2019/2020, also wax mutant (wb), also flower colour (am?)	1994	Sweden				https://www.seedstor.ac.uk/search-infoaccession.php?idPlant=26103
SZPS0585	JI2742	Green Stem	G3-5-18-4-6	P. sativum	cultivar	G1			Core hunter II selection	No							1994	Sweden				https://www.seedstor.ac.uk/search-infoaccession.php?idPlant=26129
SZPS0586	JI2743	Red Stem	G3-2-8-1-6	P. sativum	other	G1			Core hunter II selection	yes	WL 3535		red stem	Type			1994	Sweden				https://www.seedstor.ac.uk/search-infoaccession.php?idPlant=26130
SZPS0587	JI2753	Chlorotica		P. sativum	other	G3			Core hunter II selection	yes	WL 5341		chi21	Type			1994	Sweden				https://www.seedstor.ac.uk/search-infoaccession.php?idPlant=26140
SZPS0588	JI2757	Cochlearis-coch &lt; p		P. sativum	other	G5	Parvus	Parvus	Core hunter II selection	yes	WL 5446	Parvus	coch<p	Type	X-ray		1994	Sweden				https://www.seedstor.ac.uk/search-infoaccession.php?idPlant=26144
SZPS0589	JI2761	Elongata		P. sativum	cultivar	G3			Core hunter II selection	yes	WL 5736		elo	Repr			1994	Sweden				https://www.seedstor.ac.uk/search-infoaccession.php?idPlant=26148
SZPS0590	JI2764	Chlorotica		P. sativum	other	G3	Weitor	Weitor	Core hunter II selection	yes	WL 585	Weitor	chi29	Type	EMS		1994	Sweden				https://www.seedstor.ac.uk/search-infoaccession.php?idPlant=26151
SZPS0591	JI2776	Appelblossom-cr		P. sativum	other	G4			PCGIN/ modern,	yes	WL 368		cr	Type	spontaneous	JI2776 is the genetical "type line" for fuscopurpureans (cr).	1994	Sweden				https://www.seedstor.ac.uk/search-infoaccession.php?idPlant=26163
SZPS0592	JI2782	L.64		P. sativum	other	G5			Core hunter II selection	yes	L64 (WL 2686)		Hr	Type	spontaneus		1994	Sweden				https://www.seedstor.ac.uk/search-infoaccession.php?idPlant=26169
SZPS0593	JI2787	Bonneville		P. sativum	cultivar	G5	Bonneville		Core hunter II selection	yes	Bonneville		Crpt	Type	wild type		1994	Sweden				https://www.seedstor.ac.uk/search-infoaccession.php?idPlant=26174
SZPS0594	JI2822	RIL 15x399_39		P. sativum	other	G4	JI2822	JI2436	NB occurs twice	No						JI2822 is a RIL derived from the cross between JI15 and JI399	1994	United Kingdom				https://www.seedstor.ac.uk/search-infoaccession.php?idPlant=26209
SZPS0595	JI3006	Pig 16		P. sativum	other	G6			Core hunter II selection	yes	Pig 16		Bot1 Bot2	Repr	wild type	fuscopurpureus (cr) flowers	1995	Australia	India			https://www.seedstor.ac.uk/search-infoaccession.php?idPlant=26393
SZPS0596	JI3022	Twisted Tendrils-Twt		P. sativum	other		Sprint-2		Core hunter II selection	No		Sprint-2	Twt	Type	EMS		1997	Russia				https://www.seedstor.ac.uk/search-infoaccession.php?idPlant=26409
SZPS0597	JI3025	Variomaculata-vam		P. sativum	other				Core hunter II selection	yes	SGE632	SGE	vam	Type			1997	Russia				https://www.seedstor.ac.uk/search-infoaccession.php?idPlant=26412
SZPS0598	JI3027	Sparkle, E69 sym7		P. sativum	other	G5	Sparkle	Sparkle	Core hunter II selection	yes	E69	Sparkle	sym7	Type	EMS		1997	United States				https://www.seedstor.ac.uk/search-infoaccession.php?idPlant=26414
SZPS0599	JI3029	Sparkle, E54 sym18		P. sativum	other	G5	Sparkle	Sparkle	Core hunter II selection	yes	E54	Sparkle	sym18	Type	EMS		1997	United States				https://www.seedstor.ac.uk/search-infoaccession.php?idPlant=26416
SZPS0600	JI3030	Ruby		P. sativum	cultivar	G3	Ruby		Core hunter II selection	yes	Ruby		ru	Type			1997	Germany				https://www.seedstor.ac.uk/search-infoaccession.php?idPlant=26417
SZPS0601	JI3049	Fix-&#047;1		P. sativum	other				Core hunter II selection	No							1998	Russia				https://www.seedstor.ac.uk/search-infoaccession.php?idPlant=26436
SZPS0602	JI3053	Frisson, P 53 sym-30		P. sativum	cultivar	G5	Frisson		Core hunter II selection	yes	P53	Frisson	sym3	Repr	EMS		1998	France				https://www.seedstor.ac.uk/search-infoaccession.php?idPlant=26440
SZPS0603	JI3080	OK21		P. sativum	other				Core hunter II selection	No							1999	Russia				https://www.seedstor.ac.uk/search-infoaccession.php?idPlant=26467
SZPS0604	JI3086	PI 343333		P. sativum	other	G4			Core hunter II selection	No							NA	United States				https://www.seedstor.ac.uk/search-infoaccession.php?idPlant=26473
SZPS0605	JI3096	Line B		P. sativum	other				Core hunter II selection	No							NA	Russia				https://www.seedstor.ac.uk/search-infoaccession.php?idPlant=26483
SZPS0606	JI3098	Line F		P. sativum	other	G6			Core hunter II selection	No							NA	Russia				https://www.seedstor.ac.uk/search-infoaccession.php?idPlant=26485
SZPS0607	JI3119	Eat All		P. sativum	cultivar	G2			Core hunter II selection	No						p or v - uncharacterised Mendelian locus	NA	United Kingdom				https://www.seedstor.ac.uk/search-infoaccession.php?idPlant=26506
SZPS0608	JI3120	Kent Blue		P. sativum	cultivar	G2			Core hunter II selection	No						p or v - uncharacterised Mendelian locus	NA	United Kingdom				https://www.seedstor.ac.uk/search-infoaccession.php?idPlant=26507
SZPS0609	JI3134	Amac		P. sativum	cultivar	G5			Core hunter II selection	No							2001	United Kingdom	France			https://www.seedstor.ac.uk/search-infoaccession.php?idPlant=26521
SZPS0610	JI3167	Torsdag		P. sativum	cultivar	G3	Virtus		Core hunter II selection	yes	Virtus		Aero1	Repr		wt Virtus is JI3539	2002	Australia				https://www.seedstor.ac.uk/search-infoaccession.php?idPlant=26554
SZPS0611	JI3178	P.sativum-Canaries		P. sativum	landrace	G2			Core hunter II selection	No							2003	Spain	Canaries	29.1166	-13.466	https://www.seedstor.ac.uk/search-infoaccession.php?idPlant=26565
SZPS0612	JI3179	P.sativum-Canaries		P. sativum	landrace	G2			Core hunter II selection	No							2003	Spain	Canaries	29.1166	-13.466	https://www.seedstor.ac.uk/search-infoaccession.php?idPlant=26566
SZPS0613	JI3186	Black Pea		P. sativum	landrace	G2			Core hunter II selection	No							2003	Spain	Canaries	28.816	-17.783	https://www.seedstor.ac.uk/search-infoaccession.php?idPlant=26573
SZPS0614	JI3604	Stipules Reduced		P. sativum	other	G4	JI2822	JI2436	PCGIN/ modern	yes	FN 2122/2	JI 2822	st	Type	FN	JI3604 = FN2122/2 st	2013	United Kingdom				https://www.seedstor.ac.uk/search-infoaccession.php?idPlant=26991
SZPS0615	JI3605	Shiraz		P. sativum	cultivar	G4			PCGIN/ modern	No						JI3605 has purple pods. Mendel was interested in those too. A mapping population exists. Include	2013	United Kingdom				https://www.seedstor.ac.uk/search-infoaccession.php?idPlant=26992
SZPS0616	JI3609	Brutus		P. sativum	cultivar	G5			PCGIN/ modern	No						Brutus (PCGIN RIL parent)	2014	United Kingdom				https://www.seedstor.ac.uk/search-infoaccession.php?idPlant=26996
SZPS0617	JI3610	Enigma		P. sativum	cultivar	G5			PCGIN/ modern	No						Enigma (PCGIN RIL parent)	2014	United Kingdom				https://www.seedstor.ac.uk/search-infoaccession.php?idPlant=26997
SZPS0618	JI3611	Kahuna		P. sativum	cultivar				PCGIN/ modern	No						Kahuna (PCGIN RIL parent)	2014	United Kingdom				https://www.seedstor.ac.uk/search-infoaccession.php?idPlant=26998
SZPS0619	JI3614	Cooper		P. sativum	cultivar	G5			PCGIN/ modern	No						Cooper (PCGIN line of interest)	2014	United Kingdom				https://www.seedstor.ac.uk/search-infoaccession.php?idPlant=28644
SZPS0620	JI3639	Samson		P. sativum	cultivar	G4				No						cv Samson (PCGIN line of interest)	2023	Nethrland				https://www.seedstor.ac.uk/search-infoaccession.php?idPlant=61736
SZPS0621	JI2548	P. transcaucasicum	M 1133	P. sativum transcaucasicum	other wild	G7				No						JI2548 sgr variant of interest (was duplicated)	1991	Germany	Georgia	43.1	41.29	https://www.seedstor.ac.uk/search-infoaccession.php?idPlant=25936
SZPS0622	JI2647	P.sativum-Malawi		P. sativum transcaucasicum	landrace	G2			Core hunter II selection	No							1993	United Kingdom				https://www.seedstor.ac.uk/search-infoaccession.php?idPlant=26035
SZPS0623	JI2648	P.sativum-Malawi		P. sativum transcaucasicum	landrace	G2			Core hunter II selection	No							1993	United Kingdom				https://www.seedstor.ac.uk/search-infoaccession.php?idPlant=26036
SZPS0624	JI2649	P.sativum-Malawi		P. sativum transcaucasicum	landrace	G2			Core hunter II selection	No							1993	United Kingdom				https://www.seedstor.ac.uk/search-infoaccession.php?idPlant=26037

## Sheet: Table S2
Supplementary Table 2. Summary statistic on the whole-genome re-sequencing dataset of the 697 accessions selected in this study. Detailed information for each accession, including the Sample ID, Clean Reads, Quality scores Q20 (%), Quality scores Q30 (%), Average sequencing depth, Duplicate reads, Duplicate rate, Mapped reads, Mapping rate, Total base sequences and GC content, is given. The chrom…
AGIS_CAAS Code	JIC Genebank Store Code	Clean Reads	Quality scores Q20 (%)	Quality scores Q30 (%)	Average sequencing depth	Duplicate reads	Duplicate rate	Mapped reads	Mapping rate	Total bases sequences	Base content (GC)
SZPA0001	JI0002	606653602	0.976821	0.919398	22.4089	14170812	0.023359	553672541	0.935138	87846577710	37.9398
SZPA0002	JI2202	712022476	0.969344	0.903616	26.2611	15521480	0.0217991	695005836	0.995203	102948000000	38.0704
SZPA0003	JI2385	570709212	0.969039	0.895394	21.0477	13069709	0.0229008	555760312	0.994684	82510226009	37.3604
SZPE0001	JI0064	555080618	0.975663	0.916745	20.4999	10889594	0.019618	543617675	0.995724	80362994978	38.2486
SZPE0002	JI0198	358287136	0.965337	0.888361	13.2383	10070349	0.0281069	342249091	0.996659	51896303975	36.6194
SZPE0003	JI0199	482804042	0.97106	0.905938	17.8386	13896613	0.0287831	461872687	0.996468	69930120318	37.2037
SZPE0004	JI0255	481479494	0.976131	0.91979	17.7869	17526980	0.0364023	455138879	0.994212	69727704021	36.7712
SZPE0005	JI0261	533630576	0.97862	0.925949	19.7103	18505019	0.0346776	507290641	0.995267	77267623932	37.4309
SZPE0006	JI0262	460255676	0.975524	0.915531	17.0038	8102412	0.0176042	452583549	0.994993	66657664519	37.2774
SZPE0007	JI0714	514762864	0.973269	0.912689	19.0094	18765238	0.0364541	484896316	0.996459	74520024727	36.9695
SZPE0008	JI0800	441399240	0.968587	0.898559	16.3061	11105686	0.0251602	422164626	0.997833	63922528372	37.3857
SZPE0009	JI0950	446766498	0.980469	0.929497	16.5044	10356613	0.0231813	428728723	0.997979	64699805094	37.3177
SZPE0010	JI1074	629014610	0.980226	0.929076	23.2374	16589150	0.0263732	607211834	0.995212	91094255993	37.5571
SZPE0011	JI1075	513867198	0.976792	0.91627	18.9867	10168300	0.0197878	500651719	0.996261	74430879211	37.1658
SZPE0012	JI1087	496179782	0.977632	0.919388	18.3324	8725511	0.0175854	484153222	0.997446	71865897063	37.6023
SZPE0013	JI1088	682833858	0.979478	0.926001	25.2253	17095209	0.0250357	655980267	0.997753	98887203690	37.9354
SZPE0014	JI1089	392094244	0.968596	0.887928	14.4863	7899497	0.0201469	380661138	0.99677	56788538902	36.6885
SZPE0015	JI1091	563692352	0.978676	0.923177	20.8263	16153253	0.0286562	542132733	0.994976	81642606461	37.3089
SZPE0016	JI1092	544824084	0.97814	0.921426	20.1311	10239473	0.0187941	535071477	0.995087	78917206891	37.8567
SZPE0017	JI1093	536973344	0.976615	0.921309	19.8351	11471275	0.0213628	524093222	0.994964	77756684462	37.821
SZPE0018	JI1094	568148052	0.980375	0.933681	20.9857	9957214	0.0175257	559197527	0.995643	82267511122	38.4023
SZPE0019	JI1095	443607520	0.976602	0.919709	16.3825	9240837	0.0208311	433706331	0.994917	64222180746	37.251
SZPE0020	JI1096	494178504	0.971783	0.904095	18.2564	9251106	0.0187202	485386897	0.995262	71568081572	37.7389
SZPE0021	JI1703	484401638	0.96298	0.895306	17.9025	10818808	0.0223344	465950130	0.998167	70180639949	37.39
SZPE0022	JI1795	442217914	0.972578	0.906052	16.3249	8732764	0.0197476	433139442	0.995648	63996162459	37.708
SZPE0023	JI2055	485761374	0.961961	0.891023	17.9545	13494798	0.0277807	467662371	0.995155	70384398745	37.4555
SZPE0024	JI2074	690008414	0.968814	0.910455	25.5032	22405466	0.0324713	652674933	0.997198	99976746164	37.6332
SZPE0025	JI2115	1006435932	0.955404	0.869984	37.1221	33953602	0.0337365	944190937	0.99753	145525000000	37.6832
SZPE0026	JI2201	569208730	0.971432	0.909864	21.0156	14949898	0.0262644	545232149	0.997361	82384624485	37.2246
SZPE0027	JI2538	705545214	0.971405	0.905266	26.0178	21992553	0.031171	673804748	0.995711	101994000000	36.2644
SZPE0028	JI2629	557011768	0.964306	0.89887	20.5383	14047119	0.0252187	535566525	0.996443	80513298688	37.3905
SZPE0029	JI2695	642456508	0.96225	0.893113	23.7081	15587098	0.0242617	615533458	0.996999	92939629509	37.4603
SZPE0030	JI2724	684379466	0.965109	0.901284	25.2502	14141429	0.0206631	668514636	0.994628	98984840013	37.5912
SZPE0031	JI3147	418119954	0.974018	0.906531	15.3717	6394614	0.0152937	414139088	0.995713	60259517554	38.2026
SZPE0032	JI3148	530776716	0.975761	0.90328	19.5477	16943548	0.0319222	502243540	0.996923	76630114872	37.0201
SZPE0033	JI3149	507622530	0.976331	0.906078	18.705	10608980	0.0208993	499339401	0.993869	73326768084	37.5375
SZPE0034	JI3150	425180960	0.973232	0.903595	15.6427	7522680	0.0176929	415114081	0.996436	61322054157	37.3059
SZPE0035	JI3151	514498514	0.978313	0.924095	19.0001	12971901	0.0252127	494072429	0.995301	74483324665	37.3202
SZPE0036	JI3153	571140178	0.967177	0.901984	21.1095	14056293	0.0246109	549928951	0.997114	82752561265	37.3168
SZPE0037	JI3155	494218494	0.975011	0.908646	18.1756	7392462	0.0149579	488553559	0.994984	71251163574	37.2755
SZPE0038	JI3156	559766796	0.980577	0.925769	20.562	10744973	0.0191954	545968658	0.996039	80606324282	37.1698
SZPE0039	JI3157	498778764	0.976544	0.917556	18.3664	9630784	0.0193087	486371230	0.996483	71999127797	37.3523
SZPE0040	JI3158	413913754	0.974916	0.910767	15.2472	8155913	0.0197044	404145351	0.995393	59771639570	36.7219
SZPE0041	JI3159	504427726	0.976428	0.905574	18.558	10659966	0.0211328	491360015	0.995858	72750312955	37.8288
SZPE0042	JI3162	1041140138	0.973329	0.905052	38.2614	33954186	0.0326125	983365685	0.996133	149991000000	37.8558
SZPE0043	JI3163	522799870	0.97484	0.89646	19.2168	14770828	0.0282533	498648468	0.996277	75332939268	37.6485
SZPE0044	JI3263	448869520	0.966606	0.886713	16.5039	3299238	0.0073501	446790143	0.994731	64697891165	37.1676
SZPE0045	JI3271	472356598	0.957571	0.873938	17.3069	6893326	0.0145935	463909598	0.997402	67845864831	38.6899
SZPE0046	JI3273	617015092	0.957613	0.874452	22.7043	8673349	0.0140569	615604984	0.994943	89004344108	38.6499
SZPE0047	JI3274	638315076	0.955629	0.86953	23.4938	9989686	0.0156501	634672716	0.994749	92099613882	38.3646
SZPE0048	JI3275	382058118	0.955069	0.870224	14.0665	5036995	0.0131838	381351528	0.994651	55142764049	37.9239
SZPE0049	JI3276	531091910	0.962947	0.889745	19.4951	8258330	0.0155497	523406300	0.996467	76423765553	38.2744
SZPE0050	JI3511	435143478	0.962403	0.889252	15.9784	6521412	0.0149868	426567008	0.994702	62638011343	37.5373
SZPE0051	JI3553	598181760	0.957773	0.874785	22.037	6823484	0.011407	596736898	0.9958	86388772143	38.8623
SZPE0052	JI3557	568386666	0.962123	0.887474	20.873	12753031	0.0224372	553607463	0.994974	81825663210	37.446
SZPE0053	JI3558	616942410	0.95798	0.875828	22.7081	10142426	0.0164398	608598434	0.994724	89019397482	38.001
SZPE0054	JI0241	449503200	0.975418	0.914358	16.5977	9013243	0.0200516	437076164	0.996764	65065536563	37.0555
SZPE0055	JI1794	491854274	0.974071	0.910376	18.1469	9053867	0.0184076	481971245	0.996695	71138695773	38.2315
SZPE0056	JI1854	436168654	0.97376	0.909281	16.0889	9471917	0.0217162	422560094	0.996795	63070908115	37.1732
SZPE0057	JI2698	672924524	0.962686	0.894485	24.8186	10406450	0.0154645	663100908	0.995893	97292968239	38.0663
SZPE0058	JI0249	486578422	0.974553	0.912106	17.9769	9956732	0.0204627	476245744	0.994899	70472389039	37.5029
SZPE0059	JI1707	710447356	0.984099	0.934251	26.216	16819079	0.0236739	680631503	0.997865	102770915291	37.6215
SZPF0001	JI0224	468795040	0.976705	0.919295	17.32	9586991	0.0204503	464323451	0.994147	67897293884	37.8632
SZPF0002	JI1006	466121208	0.979721	0.926232	17.2125	8048201	0.0172663	464680009	0.993641	67475915747	37.3805
SZPF0003	JI1010	508011710	0.955166	0.879125	18.7578	6091133	0.0119901	510895238	0.992558	73533770355	38.0005
SZPF0004	JI1796	362065746	0.971906	0.903258	13.3531	5326551	0.0147116	362994508	0.993948	52346154356	37.8613
SZPF0005	JI2206	677224270	0.970879	0.908598	24.9815	15381016	0.0227118	667532270	0.994081	97931529235	38.1935
SZPF0006	JI2473	508116034	0.953047	0.874201	18.7669	5112924	0.0100625	513168174	0.992911	73569125072	38.0251
SZPF0007	JI2517	1022274464	0.967816	0.896999	37.7414	35796232	0.0350163	982257731	0.993926	147952000000	38.155
SZPF0008	JI2519	668191040	0.970715	0.900194	24.6686	17492295	0.0261786	653694106	0.99315	96704693991	37.6194
SZPF0009	JI2523	1387250110	0.971508	0.907956	51.1201	54191752	0.0390642	1321894880	0.994811	200399000000	38.9575
SZPF0010	JI2530	869247712	0.968469	0.898142	32.0595	23315617	0.0268228	849816327	0.993339	125678000000	37.6325
SZPF0011	JI2544	845845000	0.966616	0.892057	31.1954	25987520	0.0307237	820023485	0.993088	122291000000	37.3046
SZPS0001	JI3638	460274062	0.962809	0.892051	16.9279	7734163	0.0168034	447274323	0.998345	66360008579	38.1893
SZPS0002	JI3635	380502870	0.956568	0.875111	13.9994	8762556	0.0230289	365193127	0.998327	54880082921	37.5445
SZPS0003	JI3636	649913644	0.95356	0.868074	23.9079	12775693	0.0196575	627747827	0.997436	93722708314	37.4805
SZPS0004	JI3637	570860958	0.964803	0.898507	20.9485	16285562	0.0285281	541372279	0.998137	82121521991	38.2114
SZPS0005	JI0006	614088282	0.974532	0.911996	22.6876	18366962	0.0299093	579722539	0.997591	88939226041	37.9342
SZPS0006	JI0007	677119766	0.970751	0.917254	25.0244	19092953	0.0281973	643642002	0.998056	98099848058	37.3484
SZPS0007	JI0012	405746234	0.975674	0.914936	14.9903	13323719	0.0328376	380289384	0.996329	58764528483	37.0031
SZPS0008	JI0014	751973758	0.973015	0.923916	27.7878	23605790	0.0313918	709463295	0.998128	108933000000	37.3797
SZPS0009	JI0015	888799182	0.977391	0.930711	32.8434	31336171	0.0352568	832517786	0.998295	128751000000	38.4248
SZPS0010	JI0018	561566564	0.965237	0.901695	20.7141	10910113	0.019428	543340544	0.998397	81202711688	37.6866
SZPS0011	JI0019	1008453586	0.974246	0.921463	37.2702	46971737	0.046578	920416085	0.998299	146105000000	37.9248
SZPS0012	JI0020	475447354	0.96459	0.899352	17.5004	4609190	0.00969443	469990507	0.998315	68604494449	37.6925
SZPS0013	JI0021	510150798	0.959049	0.885265	18.8387	3365212	0.0065965	507223331	0.99806	73850887798	37.9675
SZPS0014	JI0022	521867864	0.955906	0.876865	19.2765	13350692	0.0255825	498231079	0.99836	75566848228	37.8968
SZPS0015	JI0024	398631852	0.959667	0.885144	14.7189	6337748	0.0158987	388777324	0.998014	57700470500	37.2794
SZPS0016	JI0025	600538048	0.966106	0.902823	22.1245	9561784	0.015922	585700491	0.998478	86731656569	37.7277
SZPS0017	JI0026	1482488062	0.973936	0.920829	54.7873	84105980	0.056733	1323052700	0.998315	214775000000	37.9061
SZPS0018	JI0028	458546218	0.97138	0.901051	16.9405	11036212	0.0240678	439275569	0.998194	66409533585	37.9658
SZPS0019	JI0033	359339466	0.973924	0.909366	13.2741	8421139	0.0234351	343870852	0.998255	52036595927	37.6326
SZPS0020	JI0034	680756802	0.977418	0.921834	25.1513	15711219	0.023079	652143490	0.997441	98597130858	38.0512
SZPS0021	JI0035	659072220	0.973486	0.907969	24.3497	24765418	0.0375762	612394224	0.998242	95454564453	37.8548
SZPS0022	JI0037	538674634	0.973392	0.908325	19.9003	14827963	0.0275268	510502696	0.9988	78012337480	37.7009
SZPS0023	JI0039	1108934208	0.968833	0.905506	40.9876	47417913	0.0427599	1022701214	0.997573	160678000000	38.1342
SZPS0024	JI0040	569114834	0.980856	0.931243	20.9993	8139352	0.0143018	541688352	0.99756	82320554081	36.2229
SZPS0025	JI0043	396832040	0.975961	0.916264	14.6617	10950701	0.0275953	377314083	0.998135	57476392169	37.2925
SZPS0026	JI0044	588588896	0.976949	0.920075	21.7463	18308968	0.0311065	555700547	0.998125	85249109687	37.7089
SZPS0027	JI0046	350541472	0.979291	0.921514	12.8023	4313124	0.0123042	344317653	0.997746	50186890791	37.7524
SZPS0028	JI0047	402230444	0.974182	0.910599	14.862	7865864	0.0195556	391627515	0.996507	58261359076	37.9433
SZPS0029	JI0048	522224980	0.962622	0.891618	19.2839	16219394	0.0310583	493133939	0.997709	75596054461	37.8151
SZPS0030	JI0050	661101354	0.973032	0.916917	24.435	25725566	0.0389132	613576825	0.997878	95788951230	37.2563
SZPS0031	JI0055	489179034	0.979567	0.928658	18.074	16999714	0.0347515	458279299	0.997988	70853149951	37.453
SZPS0032	JI0057	635949396	0.977413	0.921535	23.4968	25130548	0.0395166	587252616	0.997665	92111252200	37.2509
SZPS0033	JI0058	417242170	0.960795	0.875655	15.3985	7722463	0.0185083	404545885	0.997532	60364620826	37.4085
SZPS0034	JI0060	480989300	0.975512	0.915119	17.7704	16235849	0.0337551	451114765	0.997975	69662679385	37.2041
SZPS0035	JI0061	745718254	0.978362	0.924962	27.5421	34917125	0.0468235	679122818	0.998444	107970000000	37.1104
SZPS0036	JI0062	364089878	0.956712	0.862669	13.4487	6502874	0.0178606	352987486	0.998164	52721059111	37.4541
SZPS0037	JI0066	438978020	0.975003	0.912863	16.213	10402793	0.0236978	420719791	0.998279	63557511086	37.2422
SZPS0038	JI0067	422858824	0.957889	0.880762	15.6147	6222848	0.0147161	412807139	0.998409	61211992974	37.639
SZPS0039	JI0069	449929178	0.974897	0.912947	16.6176	12629592	0.0280702	427099836	0.998008	65143702234	37.7829
SZPS0040	JI0071	350184086	0.973976	0.909353	12.9391	9149228	0.0261269	334564880	0.99738	50723173067	36.7969
SZPS0041	JI0072	604063418	0.977102	0.92089	22.3148	18147922	0.0300431	569849603	0.998328	87477704584	37.7102
SZPS0042	JI0073	644925346	0.976408	0.919499	23.8112	7215709	0.0111884	621674529	0.996484	93343826118	36.3315
SZPS0043	JI0074	552490500	0.976682	0.918591	20.4065	15373364	0.0278256	524583519	0.998066	79996850591	38.0957
SZPS0044	JI0077	557925230	0.978299	0.923811	20.6025	19279036	0.0345549	522105002	0.997812	80765050224	37.4704
SZPS0045	JI0079	478201216	0.976505	0.918326	17.6661	11295263	0.0236203	459510068	0.996951	69253769353	37.449
SZPS0046	JI0080	418203686	0.974643	0.912034	15.4494	11009056	0.0263246	400137147	0.997218	60564289120	37.3864
SZPS0047	JI0082	499250278	0.976267	0.917283	18.4417	9212604	0.0184529	485378920	0.997573	72294398276	38.3631
SZPS0048	JI0083	585259468	0.968935	0.895588	21.6173	6451480	0.0110233	561668612	0.997262	84743390087	36.276
SZPS0049	JI0084	669342876	0.978702	0.925641	24.7228	17105256	0.0255553	639188912	0.998244	96917263904	37.9493
SZPS0050	JI0085	507423932	0.977427	0.921338	18.7448	14980598	0.0295228	483303756	0.996637	73482596088	37.2574
SZPS0051	JI0086	432100144	0.974281	0.91063	15.966	7602383	0.017594	422139774	0.9968	62589331450	37.522
SZPS0052	JI0087	621997128	0.978186	0.923562	22.9688	18083469	0.0290732	593109068	0.996543	90041254906	37.645
SZPS0053	JI0089	674646818	0.960109	0.887548	24.9195	13593993	0.0201498	651425051	0.998283	97688599913	37.7239
SZPS0054	JI0090	416622756	0.975484	0.914656	15.3874	10834756	0.0260062	396901327	0.998194	60320975737	37.1402
SZPS0055	JI0094	398399160	0.971198	0.899796	14.7108	7108108	0.0178417	389045269	0.996872	57668718447	37.0961
SZPS0056	JI0098	551476994	0.976733	0.921786	20.3584	18762640	0.0340225	520235337	0.996849	79808378011	37.6611
SZPS0057	JI0099	431477218	0.965066	0.890998	15.9164	1272463	0.00294909	419810991	0.994831	62394993667	37.5709
SZPS0058	JI0102	482408000	0.968148	0.899993	17.8056	5840756	0.0121075	285546496	0.997073	69800993280	37.095
SZPS0059	JI0108	450786600	0.970369	0.903871	16.6565	11842461	0.0262707	432280556	0.996442	65296312463	37.4087
SZPS0060	JI0109	500685288	0.971715	0.908096	18.498	8439952	0.0168568	489747791	0.996714	72515214501	38.3284
SZPS0061	JI0114	445288286	0.957965	0.881481	16.444	6255692	0.0140486	448622495	0.998711	64462975546	37.8346
SZPS0062	JI0116	948612334	0.971218	0.911491	35.0605	38791570	0.040893	877010552	0.997672	137443000000	37.4159
SZPS0063	JI0118	468514350	0.962533	0.894074	17.2784	8339012	0.0177988	455199358	0.998201	67734294339	38.1598
SZPS0064	JI0120	796747140	0.97941	0.936328	29.4416	29106375	0.0365315	743429688	0.997945	115416000000	37.3624
SZPS0065	JI0122	453825960	0.971318	0.910512	16.7633	9261973	0.0204086	436986553	0.998502	65714971563	37.4213
SZPS0066	JI0123	531244882	0.958943	0.885323	19.607	11502435	0.0216519	512734807	0.997922	76862615071	37.7537
SZPS0067	JI0124	429474358	0.95826	0.88686	15.8195	8448919	0.0196727	415557198	0.997996	62014801260	37.35
SZPS0068	JI0125	533531408	0.975127	0.918082	19.7064	19979739	0.0374481	496854703	0.998243	77252363805	37.5021
SZPS0069	JI0127	441391808	0.953419	0.874168	16.2992	10750517	0.024356	420952766	0.998745	63895380070	37.1544
SZPS0070	JI0128	453599478	0.973673	0.913724	16.7462	12835511	0.028297	431448868	0.997263	65647871243	37.0377
SZPS0071	JI0131	490726448	0.964874	0.903974	18.0318	9539410	0.0194394	474499468	0.998316	70687370763	37.5746
SZPS0072	JI0132	1191586220	0.981904	0.944027	44.0282	48520932	0.0407196	1103301700	0.998142	172598000000	37.7242
SZPS0073	JI0133	478829206	0.957637	0.885969	17.6808	10170364	0.0212401	461089365	0.997665	69311508600	37.4932
SZPS0074	JI0134	479094196	0.96882	0.899325	17.7019	13350542	0.0278662	454541840	0.997663	69394492393	37.2082
SZPS0075	JI0136	541682944	0.971254	0.906262	20.0123	21666232	0.039998	500203272	0.997459	78451484854	37.337
SZPS0076	JI0138	640691852	0.964313	0.896944	23.6372	12376104	0.0193168	620179976	0.998019	92661476515	37.9913
SZPS0077	JI0144	403312820	0.968853	0.899199	14.8985	11826330	0.029323	381256618	0.9986	58404594945	36.9096
SZPS0078	JI0145	461088072	0.971721	0.90818	17.0352	17426677	0.0377947	428377671	0.99849	66780712782	36.9378
SZPS0079	JI0146	402999756	0.965296	0.890257	14.879	13990944	0.034717	377655673	0.99822	58328199728	36.3116
SZPS0080	JI0147	465296188	0.973664	0.913673	17.189	15392425	0.0330809	437910542	0.998299	67383700463	37.6689
SZPS0081	JI0148	652848022	0.971449	0.919316	24.1245	11700812	0.0179227	633683122	0.998477	94572022993	37.6766
SZPS0082	JI0149	581612374	0.9744	0.915428	21.4732	18187805	0.0312714	548388024	0.998045	84178337387	36.989
SZPS0083	JI0150	483381894	0.971036	0.905866	17.8519	9738448	0.0201465	466959068	0.997869	69982331421	37.355
SZPS0084	JI0151	457019120	0.970591	0.904318	16.8809	14652434	0.0320609	429448860	0.99674	66175685704	36.881
SZPS0085	JI0152	461994600	0.968928	0.899405	17.0592	8873758	0.0192075	447068522	0.998333	66874951612	37.4725
SZPS0086	JI0154	507972396	0.967174	0.894457	18.7635	17251562	0.0339616	476321773	0.998117	73555887970	37.0222
SZPS0087	JI0157	442812578	0.952362	0.871898	16.3474	9146340	0.0206551	428645491	0.997046	64084578816	37.4255
SZPS0088	JI0162	491052680	0.971268	0.906065	18.1337	18274173	0.0372143	457490924	0.99812	71087074755	36.8129
SZPS0089	JI0166	551644840	0.975281	0.918144	20.3674	21685674	0.0393109	511400985	0.998216	79843301963	37.0474
SZPS0090	JI0167	658316168	0.970342	0.90148	24.3045	9325215	0.0141653	625332224	0.997972	95277458836	36.6134
SZPS0091	JI0172	466909348	0.973478	0.912782	17.2394	14687148	0.0314561	440261186	0.997691	67581102711	37.2058
SZPS0092	JI0174	394893086	0.962341	0.881556	14.5846	9386784	0.0237704	378698850	0.998047	57173813758	36.1642
SZPS0093	JI0175	452393194	0.968626	0.898342	16.7103	16190150	0.0357878	422816263	0.998083	65507109617	36.9245
SZPS0094	JI0176	499989230	0.972506	0.909643	18.4683	17989414	0.0359796	467029009	0.997773	72398548103	36.5983
SZPS0095	JI0177	515551144	0.972542	0.910144	19.0459	19409793	0.0376486	479708119	0.99828	74662947037	36.9768
SZPS0096	JI0180	513527908	0.96985	0.902296	18.9728	18131299	0.0353073	480213115	0.99829	74376549342	37.1456
SZPS0097	JI0181	424630720	0.956573	0.882893	15.6731	6613297	0.0155742	415916172	0.996748	61441007153	37.4372
SZPS0098	JI0184	459363220	0.97177	0.907807	16.9678	15975156	0.0347767	430728964	0.998083	66516381948	36.8218
SZPS0099	JI0185	484013514	0.972745	0.910723	17.8739	18223321	0.0376504	451646145	0.997868	70068602238	37.2361
SZPS0100	JI0188	406498998	0.969052	0.900159	15.0167	14457132	0.035565	380158581	0.997389	58867703914	36.8846
SZPS0101	JI0189	516181692	0.973728	0.913729	19.0657	15756214	0.0305246	489456239	0.99708	74740481291	37.1476
SZPS0102	JI0190	603299308	0.967485	0.89403	22.2819	6419640	0.0106409	582366817	0.997332	87348624899	37.4029
SZPS0103	JI0191	475857730	0.96924	0.900317	17.5789	15808114	0.0332203	447876559	0.997979	68911981948	37.0895
SZPS0104	JI0200	1221258532	0.979594	0.927285	45.0822	37515363	0.0307186	1156128985	0.998157	176729410556	37.9281
SZPS0105	JI0205	497224060	0.97092	0.905512	18.369	13182687	0.0265126	474708593	0.997788	72009441188	37.1499
SZPS0106	JI0208	524919524	0.970878	0.905603	19.3929	13210321	0.0251664	501769797	0.998089	76023203728	37.1693
SZPS0107	JI0209	485225050	0.970092	0.903727	17.9202	14015796	0.0288851	461674377	0.997706	70249962496	37.1342
SZPS0108	JI0210	895936974	0.975665	0.910548	33.0568	17640871	0.0196899	865380173	0.998852	129588111825	37.6605
SZPS0109	JI0214	479700604	0.976472	0.918378	17.7167	11746150	0.0244864	460387835	0.99789	69452195323	37.9083
SZPS0110	JI0216	566649936	0.976302	0.915939	20.929	9884922	0.0174445	550670752	0.998559	82045099829	37.7068
SZPS0111	JI0220	379728158	0.975637	0.915862	14.0284	15498315	0.0408142	351024739	0.998182	54993642810	36.8584
SZPS0112	JI0221	993308176	0.98256	0.934201	36.6424	8622588	0.00868068	972738673	0.99773	143644226862	37.2848
SZPS0113	JI0222	444477256	0.973399	0.908363	16.4105	18046536	0.0406017	411310685	0.99801	64331690375	36.9075
SZPS0114	JI0223	382576986	0.973373	0.907823	14.1351	11377759	0.0297398	362623716	0.997483	55411683433	37.0518
SZPS0115	JI0228	697117130	0.978288	0.921822	25.7435	15034627	0.0215669	671657239	0.998445	100918784338	37.4664
SZPS0116	JI0233	491050618	0.979012	0.927663	18.1403	17750927	0.0361489	458262310	0.9983	71112850053	36.8269
SZPS0117	JI0237	424157528	0.97792	0.923625	15.6643	14597779	0.0344159	397786633	0.998143	61406531316	36.8329
SZPS0118	JI0240	480343208	0.978701	0.926223	17.7418	16255755	0.033842	450638365	0.997731	69550766232	37.0224
SZPS0119	JI0245	474083076	0.976391	0.918116	17.5117	9481514	0.0199997	458877614	0.997743	68648646010	37.2223
SZPS0120	JI0246	359526538	0.969646	0.894881	13.2725	9182435	0.0255404	343947946	0.997661	52030230947	36.5684
SZPS0121	JI0247	402411704	0.97239	0.904361	14.8638	7821696	0.019437	390727305	0.99687	58268619671	36.8322
SZPS0122	JI0250	1042098798	0.977586	0.920156	38.4611	26370618	0.0253053	999255107	0.997707	150773588822	37.607
SZPS0123	JI0251	626726582	0.966382	0.902547	23.1118	17139785	0.0273481	599782951	0.996918	90602147471	37.7377
SZPS0124	JI0252	461125486	0.976899	0.920324	17.0378	8422487	0.0182651	449873302	0.996434	66790888121	37.0894
SZPS0125	JI0257	562756814	0.980688	0.932864	20.789	15520696	0.0275798	533442807	0.998511	81496075955	37.5177
SZPS0126	JI0267	976180172	0.978545	0.925422	36.0439	20839102	0.0213476	738073724	0.997287	141298000000	36.9929
SZPS0127	JI0268	398070986	0.96743	0.887764	14.7009	11894688	0.0298808	378291466	0.997494	57629964670	36.8199
SZPS0128	JI0270	442463494	0.973809	0.908962	16.3413	12572346	0.0284144	420664083	0.997685	64060613240	36.8047
SZPS0129	JI0275	560279058	0.968857	0.911802	20.7058	12323835	0.0219959	538774414	0.998496	81170173250	37.6873
SZPS0130	JI0276	516511616	0.978827	0.925717	19.0777	15978048	0.0309345	488596562	0.996102	74787841321	37.1549
SZPS0131	JI0288	452352096	0.975469	0.914946	16.7109	9236154	0.0204181	436367377	0.997188	65509548507	36.9946
SZPS0132	JI0295	1151830780	0.978355	0.924831	42.5335	36044030	0.0312928	1090806186	0.998048	166737986103	37.689
SZPS0133	JI0298	1185088302	0.980602	0.92744	43.7365	37692541	0.0318057	1114526903	0.998938	171454093123	37.9519
SZPS0134	JI0301	933962610	0.984189	0.941365	34.4869	27310273	0.0292413	883124171	0.998306	135194000000	37.7615
SZPS0135	JI0303	708100078	0.983288	0.938111	26.1616	17300587	0.0244324	675499642	0.998881	102558000000	37.2981
SZPS0136	JI0304	1327938898	0.986492	0.948088	48.9249	33418981	0.0251661	1265608334	0.998445	191793628768	38.1613
SZPS0137	JI0305	526854200	0.979636	0.924423	19.4657	8630909	0.016382	511109831	0.998613	76308720792	37.3207
SZPS0138	JI0314	621558296	0.985837	0.945986	22.9596	11590177	0.018647	599010295	0.998436	90005261379	37.6641
SZPS0139	JI0318	530694760	0.979065	0.92729	19.5999	15485498	0.0291797	502129368	0.99863	76834576105	37.3433
SZPS0140	JI0319	562335308	0.979852	0.93057	20.7735	16281357	0.0289531	532131918	0.998498	81435561111	37.5104
SZPS0141	JI0322	468639362	0.976402	0.918551	17.3134	11374162	0.0242706	448828428	0.997917	67871157910	37.1765
SZPS0142	JI0323	866101496	0.985324	0.944049	31.9716	27120660	0.0313135	816664980	0.997965	125334000000	37.3749
SZPS0143	JI0327	381869226	0.965842	0.902591	14.1124	6886008	0.0180324	369304545	0.998778	55322954805	37.2052
SZPS0144	JI0328	965758896	0.984511	0.941916	35.6567	28029798	0.0290236	919248317	0.996767	139780000000	37.693
SZPS0145	JI0329	822289140	0.985116	0.944588	30.3744	24261819	0.0295052	775857603	0.998704	119073000000	37.6689
SZPS0146	JI0330	837454818	0.984165	0.939994	30.9125	19542143	0.0233352	801147777	0.998392	121182000000	37.5913
SZPS0147	JI0335	512046164	0.978351	0.924775	18.9079	16734184	0.032681	480033601	0.998952	74122158313	37.1853
SZPS0148	JI0339	410493668	0.973571	0.908222	15.1655	9371394	0.0228296	394396321	0.998132	59451301023	36.9042
SZPS0149	JI0340	637448180	0.983658	0.937037	23.5396	16800262	0.0263555	606891893	0.998014	92279030036	37.4988
SZPS0150	JI0341	487964806	0.976957	0.920706	18.0269	17750808	0.0363772	454614903	0.998446	70668248649	36.9248
SZPS0151	JI0342	365918784	0.96618	0.903722	13.5239	6604894	0.0180502	354685151	0.998069	53016051224	37.5235
SZPS0152	JI0344	518220150	0.978742	0.926672	19.1465	16039387	0.0309509	489023352	0.998283	75057455183	37.3583
SZPS0153	JI0354	471984914	0.976238	0.917604	17.4356	15303669	0.0324241	443664990	0.998446	68350377719	36.9988
SZPS0154	JI0356	732707662	0.984738	0.938327	27.0216	14500225	0.0197899	707780452	0.998118	105929000000	37.2462
SZPS0155	JI0358	465614556	0.975422	0.9151	17.1968	15181808	0.032606	437497167	0.998485	67414031465	36.9606
SZPS0156	JI0361	598982882	0.967502	0.904155	22.1382	5223546	0.00872069	576844063	0.998825	86785151064	36.9968
SZPS0157	JI0362	412331524	0.97874	0.925601	15.2095	12042240	0.0292052	389762104	0.997482	59623847164	36.61
SZPS0158	JI0364	380205332	0.975779	0.915917	14.042	8354282	0.0219731	365945567	0.998216	55047049441	36.6571
SZPS0159	JI0368	442975240	0.977129	0.920511	16.357	11390164	0.0257129	423019523	0.998109	64122031348	36.8969
SZPS0160	JI0369	706634850	0.982312	0.93313	26.1025	17095170	0.0241924	675577862	0.997607	102326000000	37.5219
SZPS0161	JI0371	464052122	0.975952	0.916795	17.1385	10500719	0.0226283	446365137	0.997963	67185831768	36.9671
SZPS0162	JI0378	597340464	0.983585	0.935631	22.0342	14941909	0.0250141	565539354	0.987526	86377519533	37.6335
SZPS0163	JI0380	681871810	0.984287	0.93941	25.1874	17422067	0.0255504	651128706	0.998134	98738648218	37.3003
SZPS0164	JI0383	604236508	0.98501	0.941373	22.3218	8635666	0.0142919	589359638	0.997989	87504985072	37.4088
SZPS0165	JI0389	472353914	0.978116	0.924822	17.4497	12987330	0.0274949	447839559	0.998708	68405615908	36.9647
SZPS0166	JI0391	547144984	0.987896	0.946087	20.1425	14392820	0.0263053	521432306	0.996783	78961950406	37.9387
SZPS0167	JI0399	549438618	0.978358	0.925384	20.2872	15022426	0.0273414	522127723	0.998353	79529131828	37.743
SZPS0168	JI0400	417122666	0.97494	0.914569	15.4093	15396362	0.0369109	388161673	0.998378	60406894474	36.5723
SZPS0169	JI0402	426479568	0.975185	0.915513	15.7515	13679041	0.0320743	400946625	0.9986	61748283232	36.6373
SZPS0170	JI0406	747801042	0.979817	0.93358	27.6147	14975175	0.0200256	730991419	0.998316	108254000000	37.4326
SZPS0171	JI0409	381046480	0.959332	0.886345	14.0801	2868862	0.0075289	369718844	0.996116	55196430039	37.1348
SZPS0172	JI0411	507129786	0.977045	0.923121	18.7321	10236297	0.0201848	496126067	0.997913	73432681861	37.3106
SZPS0173	JI0417	471856464	0.977055	0.922578	17.4271	15917355	0.0337335	441340714	0.998513	68316917147	36.7921
SZPS0174	JI0420	413697544	0.975168	0.914795	15.2837	15252307	0.0368683	385083269	0.998529	59914723466	36.621
SZPS0175	JI0423	501223420	0.97653	0.919664	18.5148	16239404	0.0323995	471494076	0.998271	72580975797	37.0093
SZPS0176	JI0424	392833884	0.975175	0.914796	14.5124	8597874	0.0218868	377999237	0.998237	56891036177	37.23
SZPS0177	JI0428	450936968	0.975538	0.916499	16.6596	16666825	0.0369604	419499609	0.998677	65308445630	36.8352
SZPS0178	JI0430	445502636	0.975223	0.915298	16.4359	14476470	0.0324947	418259772	0.998991	64431469223	37.3174
SZPS0179	JI0434	655760524	0.980724	0.933218	24.1881	17324434	0.0264188	633622108	0.998208	94821364571	37.196
SZPS0180	JI0441	885200832	0.981912	0.934057	32.5887	20482530	0.0231389	859751065	0.997971	127753000000	37.6483
SZPS0181	JI0460	472048186	0.976754	0.919869	17.4356	18450970	0.039087	437126817	0.998702	68350261671	37.0028
SZPS0182	JI0466	531817400	0.980172	0.917921	19.6193	12756721	0.023987	509386917	0.997847	76910784215	37.3487
SZPS0183	JI0467	714412668	0.982079	0.926846	26.3748	24028046	0.0336333	670646525	0.997871	103393000000	37.2156
SZPS0184	JI0474	541562690	0.980566	0.932541	20.0003	16262308	0.0300285	511557961	0.998537	78404439972	37.5316
SZPS0185	JI0491	511532498	0.979384	0.928826	18.8894	19756513	0.0386222	474102325	0.998639	74049666865	36.7884
SZPS0186	JI0496	455257152	0.977536	0.922968	16.8157	12928972	0.0283993	431504821	0.998516	65920362668	36.9848
SZPS0187	JI0498	506840260	0.978509	0.925796	18.7239	14889445	0.029377	479708263	0.998364	73400780460	37.0732
SZPS0188	JI0504	379683856	0.979628	0.917846	14.0252	9560226	0.0251794	361066463	0.996787	54980967404	37.2755
SZPS0189	JI0506	595384708	0.96634	0.906103	22.0068	17696897	0.0297235	562472679	0.998489	86270229246	37.3247
SZPS0190	JI0516	784244664	0.96337	0.898158	28.9843	27071980	0.0345198	734085578	0.998013	113623000000	37.1158
SZPS0191	JI0531	686033942	0.975053	0.911151	25.3369	7689843	0.0112091	659128408	0.997805	99324605526	37.151
SZPS0192	JI0536	624085718	0.978747	0.927095	23.0574	23662581	0.0379156	579451890	0.998497	90388792857	37.3873
SZPS0193	JI0539	502986518	0.978388	0.925808	18.5809	15308459	0.0304351	474183500	0.998789	72840233195	37.0733
SZPS0194	JI0546	690417628	0.984914	0.942765	25.4994	19311068	0.0279701	655113727	0.997918	99961758412	37.542
SZPS0195	JI0550	480498124	0.977282	0.922229	17.7506	13617218	0.0283398	455167239	0.998524	69585402326	36.9189
SZPS0196	JI0554	547281686	0.979313	0.928618	20.2141	23546457	0.0430244	502008884	0.998733	79242507576	36.9962
SZPS0197	JI0558	488320194	0.978257	0.925176	18.032	10395875	0.0212891	470148456	0.997959	70688378823	37.2433
SZPS0198	JI0560	699785920	0.981338	0.929201	25.8356	18352897	0.0262264	665800418	0.997997	101280000000	37.2904
SZPS0199	JI0566	490812446	0.973909	0.910978	18.1283	14230133	0.028993	464413206	0.998628	71065837708	36.9665
SZPS0200	JI0568	470146976	0.976138	0.918174	17.3641	9507861	0.0202232	453326882	0.998411	68070264906	37.928
SZPS0201	JI0571	437448580	0.964048	0.88563	16.1413	2663948	0.00608974	416103280	0.996853	63276538593	37.0549
SZPS0202	JI0573	511875518	0.97741	0.92255	18.9111	14305756	0.0279477	485663251	0.998774	74134535872	37.5415
SZPS0203	JI0574	826334936	0.984412	0.940038	30.4888	23347200	0.0282539	784206509	0.998064	119521000000	37.5285
SZPS0204	JI0582	1121183496	0.970606	0.91861	41.4376	38560181	0.0343924	1048475138	0.998732	162442000000	37.7814
SZPS0205	JI0584	619338498	0.98627	0.942913	22.821	12205927	0.019708	597631422	0.99817	89461988916	37.8986
SZPS0206	JI0607	617523116	0.984734	0.939452	22.7771	16184522	0.0262088	587828560	0.997756	89289789690	37.441
SZPS0207	JI0614	813197740	0.965208	0.903446	30.0571	31961079	0.039303	751474203	0.998877	117829000000	37.4052
SZPS0208	JI0616	454288586	0.976363	0.919005	16.7838	12393217	0.0272805	432218981	0.997989	65795198328	37.0511
SZPS0209	JI0635	465854806	0.975319	0.921452	17.2089	14108492	0.0302852	440494665	0.998284	67461551690	37.3673
SZPS0210	JI0651	567312648	0.980271	0.932097	20.9537	16460294	0.0290145	536306742	0.998132	82142016890	37.3518
SZPS0211	JI0653	756912992	0.983561	0.937741	27.9532	19897656	0.0262879	718955290	0.998624	109581000000	37.4688
SZPS0212	JI0657	602382602	0.987319	0.943698	22.1646	17723280	0.029422	570448174	0.997308	86888881554	37.5387
SZPS0213	JI0662	480224390	0.977969	0.924617	17.7343	17244311	0.0359089	447768456	0.99864	69521243461	36.8262
SZPS0214	JI0665	701285414	0.963427	0.897944	25.9186	18824225	0.0268425	665088942	0.9981	101605000000	37.0873
SZPS0215	JI0670	663256064	0.96329	0.89778	24.5127	19581897	0.0295239	626551138	0.998638	96093599554	37.3181
SZPS0216	JI0681	703658438	0.965653	0.904505	26.0084	18295958	0.0260012	669450688	0.998767	101957000000	37.3449
SZPS0217	JI0692	458310524	0.976147	0.918356	16.9326	15940947	0.034782	429859441	0.997929	66378506636	37.2024
SZPS0218	JI0693	454994130	0.977493	0.922425	16.8054	13383227	0.0294141	431154429	0.998212	65879957718	36.836
SZPS0219	JI0695	433164126	0.973695	0.910262	15.9997	14142312	0.0326489	407324828	0.998434	62721404813	37.2063
SZPS0220	JI0699	532361916	0.980312	0.93142	19.6454	14217709	0.0267068	507846232	0.99838	77013238706	38.1263
SZPS0221	JI0701	366887308	0.967297	0.890735	13.5505	9279996	0.0252939	350566786	0.998509	53120112815	36.4871
SZPS0222	JI0703	556670618	0.978771	0.926948	20.566	13524850	0.024296	533559482	0.997723	80621967429	37.5018
SZPS0223	JI0705	521525018	0.962578	0.895326	19.2684	11000286	0.0210925	503313789	0.997965	75535172483	36.9855
SZPS0224	JI0711	598313710	0.966541	0.903433	22.0814	14988314	0.0250509	573175400	0.997878	86562769447	38.4769
SZPS0225	JI0712	495439224	0.977987	0.924043	18.2972	19709760	0.0397824	459542090	0.998024	71727816759	36.7021
SZPS0226	JI0716	405047626	0.970519	0.904202	14.9627	11611549	0.0286671	386641109	0.996887	58656105750	36.832
SZPS0227	JI0717	1090145976	0.967743	0.910729	40.2894	23474076	0.021533	1050184384	0.998269	157941000000	37.9123
SZPS0228	JI0718	455449810	0.971128	0.906449	16.8205	11526462	0.0253079	435614937	0.998233	65939221900	37.7565
SZPS0229	JI0720	600879964	0.968602	0.899333	22.1985	12107073	0.0201489	579219283	0.998583	87021798029	37.6449
SZPS0230	JI0721	776169398	0.967748	0.910134	28.6853	23771579	0.0306268	731466746	0.998689	112451000000	37.8617
SZPS0231	JI0727	736599428	0.974163	0.914938	27.1956	27129835	0.0368312	685148166	0.998969	106611000000	37.9115
SZPS0232	JI0734	678967114	0.986748	0.948141	25.069	16107818	0.023724	651232886	0.997456	98274388207	37.7901
SZPS0233	JI0735	545075416	0.975028	0.916792	20.1026	14681145	0.0269342	519733044	0.998342	78805599652	37.8516
SZPS0234	JI0737	378226616	0.962986	0.884132	13.969	13069424	0.0345545	353752077	0.99863	54760679786	36.2013
SZPS0235	JI0738	505197950	0.975408	0.919129	18.6604	16500786	0.032662	474403890	0.998581	73151687411	37.1802
SZPS0236	JI0745	354917952	0.963011	0.884616	13.0999	9794814	0.0275974	337039963	0.998758	51353671507	37.4066
SZPS0237	JI0746	373585442	0.966906	0.893664	13.8023	6478760	0.0173421	362514892	0.998742	54107210506	37.8425
SZPS0238	JI0752	481810610	0.971519	0.907185	17.7982	7755481	0.0160965	472391801	0.997378	69771846318	37.8302
SZPS0239	JI0754	470275630	0.970424	0.904053	17.3745	9210437	0.0195852	456701021	0.997	68110967714	37.1774
SZPS0240	JI0757	480439438	0.970536	0.904626	17.7457	9824073	0.0204481	463071972	0.998791	69565825514	37.8392
SZPS0241	JI0774	481167506	0.971257	0.906664	17.7751	12598024	0.0261822	458224323	0.998744	69681313827	37.3159
SZPS0242	JI0780	473127134	0.970391	0.904007	17.4806	11205777	0.0236845	453044902	0.998596	68526828967	37.0498
SZPS0243	JI0781	735713030	0.97333	0.912652	27.1526	6475387	0.00880151	419936764	0.998811	106442630955	37.3811
SZPS0244	JI0782	456332924	0.970052	0.903565	16.8516	8803929	0.0192928	441984892	0.998165	66060917529	37.8992
SZPS0245	JI0787	504540590	0.975132	0.917937	18.6317	12625828	0.0250244	483037764	0.998108	73039308694	37.6773
SZPS0246	JI0790	429937088	0.96177	0.879217	15.8686	2874383	0.00668559	423519046	0.998467	62207331391	36.9952
SZPS0247	JI0794	728883996	0.97181	0.906767	26.8801	5890174	0.00808109	424549810	0.998307	105374412539	37.6243
SZPS0248	JI0795	851082020	0.971598	0.903651	31.4034	13538480	0.0159074	660851393	0.99833	123106323433	36.9411
SZPS0249	JI0799	447916290	0.96855	0.898503	16.5452	7991409	0.0178413	433329604	0.998986	64859853105	37.8862
SZPS0250	JI0804	380100594	0.967436	0.901036	13.9992	4839236	0.0127315	373594186	0.997835	54879176382	37.7304
SZPS0251	JI0806	513858694	0.973295	0.913076	18.9859	14372122	0.027969	488455502	0.998342	74427945373	37.222
SZPS0252	JI0807	549058314	0.965567	0.891164	20.2708	1772242	0.00322778	254792238	0.997315	79464820601	37.5211
SZPS0253	JI0808	471327224	0.96978	0.902539	17.4138	10544127	0.0223711	453684749	0.998217	68264871698	37.7288
SZPS0254	JI0813	462522882	0.971432	0.907512	17.0869	13600569	0.0294052	438212745	0.998235	66983452181	36.7676
SZPS0255	JI0814	470473464	0.968562	0.899668	17.3726	14800402	0.0314585	442742525	0.998768	68103261184	36.6628
SZPS0256	JI0815	439548442	0.969433	0.901547	16.2305	8910780	0.0202726	424073507	0.998154	63626133893	37.6487
SZPS0257	JI0817	411738698	0.96972	0.90822	15.1464	9461962	0.0229805	394687965	0.998205	59376301836	37.7431
SZPS0258	JI0819	418321734	0.968331	0.898046	15.4543	10424452	0.0249197	399500488	0.998413	60583178953	36.6946
SZPS0259	JI0820	344358890	0.960914	0.877763	12.7181	7407017	0.0215096	331234823	0.997547	49857032869	37.0838
SZPS0260	JI0825	407364398	0.96547	0.889215	15.0482	9013099	0.0221254	391859932	0.99812	58991379711	37.1807
SZPS0261	JI0829	415672960	0.969621	0.908582	15.3276	5841224	0.0140525	405751501	0.998635	60086587177	37.7527
SZPS0262	JI0832	475187208	0.970201	0.903541	17.5575	13094477	0.0275565	451128979	0.99822	68828387863	37.3024
SZPS0263	JI0837	493941728	0.972184	0.909881	18.2496	9166136	0.0185571	477773566	0.998433	71541525842	36.9853
SZPS0264	JI0841	404208134	0.96931	0.90096	14.9323	8072904	0.0199721	389327602	0.999003	58536952408	36.9114
SZPS0265	JI0844	388667632	0.967555	0.901663	14.2963	7904137	0.0203365	374373257	0.998674	56043707737	37.2812
SZPS0266	JI0846	590682254	0.970564	0.903852	21.7765	1719435	0.00291093	256502364	0.997757	85367532658	37.6257
SZPS0267	JI0853	427338872	0.97053	0.90429	15.786	10902969	0.0255136	407930721	0.998581	61883541155	36.946
SZPS0268	JI0854	481361534	0.971347	0.907126	17.7773	14862945	0.0308769	453890794	0.998402	69689785660	37.0097
SZPS0269	JI0859	1006914028	0.981423	0.941115	37.2063	38525558	0.038261	933630745	0.998678	145855000000	37.5432
SZPS0270	JI0863	456442340	0.971793	0.908256	16.8645	14323472	0.0313807	430637337	0.998299	66111702354	36.8612
SZPS0271	JI0870	574472014	0.966909	0.893899	21.2084	4858974	0.00845816	229527795	0.99845	83140237134	37.1516
SZPS0272	JI0874	344573688	0.960811	0.877299	12.7286	10065204	0.0292106	325371356	0.998995	49898349116	36.7177
SZPS0273	JI0877	354951000	0.959304	0.878771	13.0992	5567915	0.0156864	344898333	0.99875	51351013532	37.5216
SZPS0274	JI0884	352276184	0.964331	0.891615	12.957	6263777	0.0177809	340920612	0.998654	50793366862	37.5313
SZPS0275	JI0887	563200460	0.967934	0.898202	20.7849	2505033	0.00444785	223427704	0.998266	81480193236	37.4179
SZPS0276	JI0892	373952130	0.9645	0.893009	13.775	6802974	0.0181921	362503242	0.998303	54000139011	37.9632
SZPS0277	JI0893	581960534	0.972584	0.909327	21.4632	2548542	0.00437924	234581414	0.998515	84139172401	37.6841
SZPS0278	JI0907	750232678	0.987517	0.945365	27.6129	17026970	0.0226956	720876618	0.998417	108246850197	37.3098
SZPS0279	JI0909	465497596	0.953555	0.874806	17.1671	10365218	0.022267	447083804	0.998205	67297669854	37.1992
SZPS0280	JI0930	401024798	0.967114	0.894428	14.8124	10287297	0.0256525	382541867	0.998715	58067096825	37.6788
SZPS0281	JI0932	801213726	0.985186	0.938753	29.5669	16035942	0.0200146	774561264	0.998052	115906829726	37.655
SZPS0282	JI0935	641215416	0.981799	0.930046	23.6816	3378622	0.00526909	339838018	0.998761	92835553597	37.5131
SZPS0283	JI0949	502213526	0.980487	0.929565	18.554	16433859	0.0327229	472497451	0.998091	72734619457	37.7466
SZPS0284	JI0952	435840926	0.976784	0.919041	16.1016	10214086	0.0234354	418277498	0.998124	63120713425	36.6767
SZPS0285	JI0955	511527676	0.980649	0.929528	18.8924	15311139	0.0299322	483955917	0.998314	74061426887	37.1552
SZPS0286	JI0957	441385150	0.983171	0.930933	16.2976	6170972	0.0139809	431350382	0.998019	63889144357	37.6137
SZPS0287	JI0958	477374344	0.979205	0.924912	17.6332	12486019	0.0261556	454997566	0.99846	69124799211	37.9611
SZPS0288	JI0965	631538332	0.978692	0.923108	23.3281	21335224	0.0337829	592624218	0.997577	91450088228	37.3855
SZPS0289	JI0968	496855708	0.979595	0.926175	18.3533	11810208	0.0237699	476665012	0.99804	71947854069	37.2789
SZPS0290	JI0971	654978084	0.972638	0.903808	24.1925	7178558	0.01096	622407460	0.998273	94838632117	36.2207
SZPS0291	JI0974	400891626	0.975229	0.910845	14.8076	10713446	0.026724	381709654	0.998254	58048291344	36.8922
SZPS0292	JI0991	579436482	0.981128	0.930916	21.4063	19796203	0.0341646	541806597	0.99877	83915993317	37.2038
SZPS0293	JI1002	380806002	0.975961	0.913047	14.0666	10795858	0.02835	361830364	0.997907	55143236635	36.3764
SZPS0294	JI1014	524571848	0.979797	0.927121	19.3773	12875415	0.0245446	501741745	0.998382	75962056512	37.573
SZPS0295	JI1017	396965182	0.977123	0.917505	14.6665	10203442	0.0257036	377918034	0.998495	57494847113	36.9576
SZPS0296	JI1018	399054478	0.979521	0.925921	14.7399	9551805	0.0239361	381714665	0.998587	57782753863	37.9698
SZPS0297	JI1035	394355318	0.975313	0.910766	14.5689	7478816	0.0189647	382902327	0.997722	57112579474	37.3838
SZPS0298	JI1041	530138024	0.981428	0.932832	19.5793	24269842	0.0457802	484496814	0.998192	76753814871	37.2901
SZPS0299	JI1043	657414068	0.980224	0.928521	24.278	18315677	0.0278602	626067779	0.998055	95173656377	37.6533
SZPS0300	JI1055	463903818	0.976662	0.915456	17.1345	11910407	0.0256743	443179123	0.997878	67169848938	36.9882
SZPS0301	JI1058	412877490	0.974435	0.908245	15.2466	10418094	0.0252329	394340753	0.996792	59769221394	36.4274
SZPS0302	JI1059	456998976	0.976447	0.917091	16.8831	12152980	0.026593	435602104	0.997898	66184481833	37.0923
SZPS0303	JI1071	500573436	0.976244	0.914522	18.495	12694152	0.0253592	478001722	0.998132	72503312571	37.0954
SZPS0304	JI1078	745639858	0.979982	0.928414	27.5465	19277699	0.0258539	712265142	0.998052	107987000000	37.4969
SZPS0305	JI1082	467500744	0.977758	0.919617	17.2565	18290747	0.0391245	433716459	0.998148	67648152538	36.0975
SZPS0306	JI1084	547904540	0.978057	0.920757	20.242	14326329	0.0261475	522783030	0.998301	79351708654	37.3555
SZPS0307	JI1085	941170942	0.980416	0.928933	34.7592	33669521	0.0357741	880118323	0.998171	136262000000	37.882
SZPS0308	JI1086	451276354	0.976729	0.916405	16.67	7492738	0.0166034	440487811	0.997896	65349142507	37.7585
SZPS0309	JI1109	490029994	0.97727	0.921902	18.1023	9218100	0.0188113	477467392	0.997147	70964033435	37.4403
SZPS0310	JI1117	542311860	0.969979	0.897693	20.0265	3613142	0.00666248	530287628	0.99681	78507100753	36.7582
SZPS0311	JI1121	485127646	0.977176	0.921639	17.9259	9662080	0.0199166	471666531	0.997325	70272276954	37.7711
SZPS0312	JI1125	597487526	0.978092	0.924474	22.0693	22211610	0.037175	556630179	0.998465	86515236814	37.3065
SZPS0313	JI1128	513187550	0.975317	0.921947	18.9604	14995181	0.0292197	486457450	0.998294	74327797500	37.3124
SZPS0314	JI1129	613633754	0.980992	0.934067	22.6653	22134143	0.0360706	573070029	0.998426	88851714552	37.2501
SZPS0315	JI1132	656303112	0.976629	0.920196	24.2412	23204298	0.0353561	613689119	0.99809	95029595080	37.0557
SZPS0316	JI1147	409249498	0.972393	0.906384	15.1208	6834321	0.0166996	397700053	0.998676	59275928330	37.7249
SZPS0317	JI1165	657336450	0.977017	0.920913	24.282	20037352	0.0304826	619115038	0.998892	95189230203	37.2635
SZPS0318	JI1173	441273492	0.971296	0.902432	16.3041	11077193	0.0251028	421865984	0.99813	63914692501	37.2368
SZPS0319	JI1179	516114072	0.976229	0.918517	19.066	18926015	0.0366702	482228236	0.998028	74741664185	36.9339
SZPS0320	JI1187	350538774	0.965852	0.885891	12.9485	7373238	0.021034	337801249	0.998431	50760143517	36.8947
SZPS0321	JI1194	556084780	0.978706	0.926411	20.5435	22970711	0.0413079	512833923	0.998525	80533712167	37.0083
SZPS0322	JI1200	654079928	0.96941	0.911312	24.1421	17454494	0.0266856	622012632	0.997975	94640844969	37.8948
SZPS0323	JI1201	695098588	0.98574	0.941076	25.6631	9407851	0.0135346	679728794	0.998471	100603592932	37.9601
SZPS0324	JI1205	552488032	0.977349	0.921762	20.4008	19969809	0.0361452	514911199	0.998401	79974463039	37.2551
SZPS0325	JI1210	947824030	0.988413	0.946105	34.7471	21175627	0.0223413	910008906	0.998841	136214103414	37.4973
SZPS0326	JI1212	500523626	0.977274	0.922009	18.49	14328268	0.0286266	474961511	0.998305	72483696584	37.1613
SZPS0327	JI1214	734603802	0.977553	0.912335	27.1521	26584678	0.0361891	684435987	0.998457	106441000000	36.8166
SZPS0328	JI1217	467171664	0.975295	0.915418	17.2566	15002597	0.0321137	439845877	0.998307	67648719713	37.0272
SZPS0329	JI1219	955101410	0.986615	0.945503	35.2422	36318726	0.038026	887565695	0.998312	138155024307	37.5595
SZPS0330	JI1222	524739198	0.97592	0.917561	19.3802	18815021	0.0358559	490416091	0.998022	75973655806	37.1645
SZPS0331	JI1224	492015998	0.971255	0.902926	18.1772	15620666	0.0317483	463841047	0.998194	71257424897	37.547
SZPS0332	JI1227	563678062	0.975556	0.91613	20.8247	18636141	0.0330617	529490729	0.997885	81636102706	37.2485
SZPS0333	JI1228	726493354	0.986458	0.942233	26.7487	12508968	0.0172183	705992719	0.998189	104859318524	37.5757
SZPS0334	JI1229	532399132	0.976467	0.919275	19.6722	16243662	0.0305103	501628318	0.998828	77118351599	37.2866
SZPS0335	JI1231	382903538	0.969726	0.898912	14.1395	10988662	0.0286983	362505124	0.998882	55429067716	37.122
SZPS0336	JI1237	539425976	0.979621	0.929479	19.9233	20503741	0.0380103	500097385	0.998912	78102633643	37.3217
SZPS0337	JI1245	582124060	0.9695	0.897819	21.5018	22865289	0.0392791	538952122	0.998579	84290326957	36.5625
SZPS0338	JI1246	356128866	0.969864	0.897555	13.158	8202880	0.0230335	341560741	0.99829	51581559856	36.8536
SZPS0339	JI1260	694499298	0.97929	0.928043	25.6503	25813769	0.0371689	647495196	0.998276	100553000000	37.0765
SZPS0340	JI1261	471868906	0.974336	0.912145	17.437	13815656	0.0292786	448655015	0.995458	68355678978	37.092
SZPS0341	JI1263	449234558	0.972143	0.905025	16.5998	14270767	0.0317669	423506954	0.997612	65073761875	37.1643
SZPS0342	JI1265	805941226	0.968325	0.908863	29.7814	28724948	0.0356415	752282288	0.996301	116748000000	37.2273
SZPS0343	JI1266	729990870	0.96957	0.912403	26.9711	28752015	0.0393868	677150813	0.997858	105731000000	37.5823
SZPS0344	JI1268	738235916	0.971668	0.918581	27.2631	33337211	0.0451579	678144796	0.99688	106876000000	37.3083
SZPS0345	JI1269	954117442	0.97753	0.929186	35.2392	50724691	0.053164	861491592	0.997554	138143000000	37.9064
SZPS0346	JI1270	844397680	0.974685	0.920133	31.1919	32736487	0.038769	786526575	0.997548	122277000000	37.8236
SZPS0347	JI1272	753720222	0.984528	0.934286	27.776	15383345	0.0204099	727408381	0.998336	108886506859	37.7803
SZPS0348	JI1277	1433274408	0.974436	0.920022	52.9562	85187492	0.0594356	1270173576	0.99844	207597000000	37.6275
SZPS0349	JI1280	1182442336	0.969962	0.906498	43.6937	57886691	0.0489552	1071399163	0.998748	171286000000	37.7388
SZPS0350	JI1282	975233076	0.974565	0.920491	36.034	47440071	0.0486449	884809821	0.998574	141259000000	37.4794
SZPS0351	JI1294	1196526380	0.97509	0.921984	44.2087	64181101	0.0536395	1073882327	0.998501	173305000000	37.5459
SZPS0352	JI1303	1145767582	0.975948	0.925086	42.3254	54441984	0.0475157	1041874915	0.998526	165922000000	37.8764
SZPS0353	JI1307	780631240	0.979247	0.934832	28.834	25587679	0.0327782	734950417	0.998247	113034000000	37.7356
SZPS0354	JI1313	883018418	0.976425	0.928322	32.5964	39049386	0.0442226	808357943	0.998904	127783000000	38.2552
SZPS0355	JI1344	740941418	0.97471	0.923807	27.3584	24702416	0.0333392	696222299	0.998313	107249000000	38.1296
SZPS0356	JI1345	805238086	0.973282	0.92128	29.7436	26813608	0.033299	756183208	0.996487	116600000000	37.5724
SZPS0357	JI1366	574523578	0.972174	0.918354	21.2247	21347335	0.0371566	535262424	0.99765	83204419673	37.551
SZPS0358	JI1386	357104694	0.945125	0.846628	13.1957	7441309	0.0208379	343953534	0.996801	51729361055	37.6131
SZPS0359	JI1395	541356016	0.974595	0.914779	20.0058	16062315	0.0296705	511518397	0.997293	78425843761	37.463
SZPS0360	JI1398	686118318	0.973419	0.922265	25.3501	21400512	0.0311907	648226868	0.996833	99376626767	37.8081
SZPS0361	JI1407	742774850	0.977351	0.929087	27.4485	26322050	0.0354375	694152786	0.998304	107603000000	37.263
SZPS0362	JI1423	612986166	0.978934	0.92725	22.6542	17147064	0.027973	580592431	0.997918	88807963075	37.288
SZPS0363	JI1434	740332718	0.9798	0.927206	27.349	35554992	0.0480257	673692935	0.997486	107213000000	37.4997
SZPS0364	JI1444	717551732	0.982364	0.943548	26.516	23210194	0.0323464	677159857	0.997037	103947000000	37.4624
SZPS0365	JI1453	618256516	0.979609	0.92782	22.8421	25733533	0.0416227	570483384	0.997277	89544636058	37.252
SZPS0366	JI1462	764467684	0.980722	0.930105	28.2378	34049802	0.0445405	700631088	0.997515	110697000000	37.2755
SZPS0367	JI1464	576639756	0.963819	0.892985	21.2994	19832336	0.0343929	540499918	0.997698	83496947848	37.8906
SZPS0368	JI1469	1483161348	0.971043	0.905056	54.7763	71908372	0.0484832	1348394917	0.997362	214732000000	38.2009
SZPS0369	JI1477	643756434	0.97828	0.932709	23.7903	22767412	0.0353665	602589676	0.997682	93261840348	37.686
SZPS0370	JI1482	1015448994	0.967815	0.899789	37.4752	7373188	0.00726101	253128143	0.996406	146909000000	37.4537
SZPS0371	JI1486	1283898108	0.965105	0.886519	47.4394	57640280	0.0448947	1172427174	0.993766	185970000000	37.3096
SZPS0372	JI1491	861070620	0.978874	0.934286	31.826	40818127	0.0474039	786332654	0.997106	124763000000	37.3682
SZPS0373	JI1492	1076279570	0.989091	0.955788	39.774	58173234	0.0540503	965774618	0.997871	155920000000	37.5169
SZPS0374	JI1503	1650376780	0.968432	0.897178	60.9731	92232663	0.0558858	1474777147	0.996656	239024000000	37.8766
SZPS0375	JI1519	942973384	0.983328	0.944471	34.841	45298566	0.048038	853284191	0.991918	136582000000	37.5979
SZPS0376	JI1523	625725572	0.978844	0.928081	23.1243	25941824	0.0414588	577516822	0.997151	90651154902	37.2723
SZPS0377	JI1524	901930158	0.984641	0.940296	33.334	20278714	0.0224837	868275262	0.997306	130675000000	37.5173
SZPS0378	JI1528	357676462	0.975928	0.919594	13.2182	8646299	0.0241735	342706571	0.997778	51817432593	37.385
SZPS0379	JI1529	1091539902	0.983649	0.937416	40.3444	52484856	0.0480833	993527702	0.99768	158156000000	37.3167
SZPS0380	JI1535	1889349336	0.968659	0.898379	69.8003	114682406	0.0606994	1674224144	0.997085	273628000000	37.9042
SZPS0381	JI1538	495350942	0.979817	0.930302	18.3062	11358781	0.0229308	475274041	0.997891	71763077488	37.2989
SZPS0382	JI1539	1777596436	0.970304	0.904267	65.6614	92241094	0.0518909	1609611078	0.996837	257403000000	37.2389
SZPS0383	JI1542	1968360748	0.973433	0.912727	72.714	122890442	0.0624329	1740562593	0.997132	285050000000	37.5436
SZPS0384	JI1543	1009207966	0.985278	0.942691	37.3021	26659408	0.0264162	966238395	0.99654	146230000000	37.3232
SZPS0385	JI1547	678848630	0.983378	0.940309	25.0891	19317507	0.0284563	645157914	0.997335	98353459181	37.3117
SZPS0386	JI1548	508418306	0.976731	0.923649	18.7862	22398176	0.0440546	467010034	0.99734	73644796850	36.1163
SZPS0387	JI1555	900905884	0.981614	0.936364	33.296	30555009	0.0339159	843129421	0.998264	130526000000	37.4488
SZPS0388	JI1562	640790810	0.983834	0.937467	23.6703	25402778	0.0396429	593032040	0.998354	92791233545	37.2365
SZPS0389	JI1569	647116922	0.979251	0.928341	23.9151	24691735	0.0381565	600312933	0.99831	93751130575	36.9495
SZPS0390	JI1573	657060234	0.983111	0.935718	24.2738	21196118	0.032259	618458815	0.998131	95157019135	37.5714
SZPS0391	JI1575	641766036	0.983666	0.937088	23.7044	14818932	0.0230909	615823218	0.998162	92925152633	37.3425
SZPS0392	JI1577	836368624	0.981102	0.93396	30.9125	28109611	0.0336091	782394006	0.998528	121182000000	37.5852
SZPS0393	JI1578	468373006	0.975337	0.910733	17.3003	13745354	0.029347	445539944	0.996584	67820042132	35.7356
SZPS0394	JI1581	670782044	0.980147	0.926272	24.7757	27205062	0.0405572	620917575	0.997812	97124831396	36.8553
SZPS0395	JI1585	766980050	0.979113	0.929587	28.3495	29969632	0.0390749	711913931	0.997871	111135000000	37.2096
SZPS0396	JI1587	696148060	0.984941	0.937031	25.7176	27777748	0.0399021	645496555	0.997783	100817000000	37.1941
SZPS0397	JI1588	888442232	0.982631	0.939455	32.8356	38823478	0.0436984	816467837	0.997813	128721000000	37.2299
SZPS0398	JI1590	631167496	0.982471	0.933989	23.3179	21375659	0.0338669	592318130	0.997848	91409750778	36.8325
SZPS0399	JI1592	703471538	0.984848	0.938849	25.9764	35915948	0.0510553	636127981	0.997967	101832000000	36.6105
SZPS0400	JI1607	746451446	0.984483	0.939251	27.5703	24871935	0.0333202	701865936	0.997973	108080000000	37.2073
SZPS0401	JI1625	516550204	0.981124	0.934204	19.0908	12622316	0.0244358	493689570	0.997317	74838897419	37.6716
SZPS0402	JI1626	819323436	0.984691	0.945991	30.2802	27787288	0.0339149	768115906	0.997562	118703000000	37.4944
SZPS0403	JI1636	589034088	0.982009	0.932253	21.7589	16824641	0.0285631	559262215	0.998144	85298361479	36.9152
SZPS0404	JI1639	609830560	0.984124	0.937853	22.522	19076207	0.0312812	575452911	0.998032	88290026010	36.871
SZPS0405	JI1652	521952884	0.979892	0.924878	19.2738	12760977	0.0244485	499423462	0.998015	75556242728	36.5638
SZPS0406	JI1663	536060000	0.973028	0.923959	19.8092	17415913	0.0324887	504790525	0.998251	77655431835	37.5356
SZPS0407	JI1669	646015362	0.983003	0.93503	23.8573	20219806	0.0312993	609477761	0.99771	93524387790	36.7227
SZPS0408	JI1679	519715522	0.960944	0.889624	19.2087	11094674	0.0213476	500349696	0.998277	75301183001	37.7532
SZPS0409	JI1698	688232762	0.983891	0.937878	25.4223	24923924	0.0362144	644843741	0.996562	99659659757	36.9255
SZPS0410	JI1699	611873222	0.96385	0.898033	22.613	14186713	0.0231857	588519776	0.997773	88646479394	37.4457
SZPS0411	JI1702	465960098	0.971606	0.902581	17.2	12691216	0.0272367	444661978	0.99769	67426701915	37.3131
SZPS0412	JI1704	507281804	0.975947	0.925896	18.6882	11225349	0.0221284	488580931	0.997585	73260857671	38.1148
SZPS0413	JI1705	505988922	0.970619	0.913671	18.6799	11190980	0.022117	487074383	0.997281	73228205756	38.3266
SZPS0414	JI1706	392766748	0.972987	0.907087	14.4943	7527052	0.0191642	380419516	0.998146	56819897571	37.4228
SZPS0415	JI1713	456675286	0.956813	0.883108	16.8326	6914242	0.0151404	445546984	0.99808	65986582855	37.5444
SZPS0416	JI1714	418432418	0.961368	0.890937	15.4658	8907171	0.021287	402567054	0.998544	60628594964	37.38
SZPS0417	JI1718	711309356	0.963892	0.89882	26.2846	22381819	0.0314657	670496900	0.997962	103040000000	37.2785
SZPS0418	JI1720	463490594	0.964985	0.901045	17.1299	8093356	0.0174617	448710451	0.998901	67151967172	37.9669
SZPS0419	JI1721	568562862	0.964647	0.900418	21.0145	19496027	0.03429	531322205	0.99887	82380419571	37.4038
SZPS0420	JI1722	661827178	0.968802	0.912215	24.4571	17954153	0.0271282	630043169	0.998477	95875806122	37.6618
SZPS0421	JI1724	687171312	0.969562	0.914366	25.3967	18890156	0.0274897	653852308	0.9983	99558994478	37.4876
SZPS0422	JI1732	563659134	0.971194	0.918933	20.8319	14111276	0.0250351	538556040	0.998596	81664380431	37.3645
SZPS0423	JI1733	350144836	0.959688	0.885245	12.9418	5338421	0.0152463	341342862	0.998472	50733968967	37.3976
SZPS0424	JI1735	589554588	0.969422	0.913982	21.789	18810323	0.031906	555832674	0.99836	85416512823	37.941
SZPS0425	JI1737	347014148	0.96962	0.896588	12.8022	9667479	0.027859	329762217	0.998504	50186724525	36.7043
SZPS0426	JI1747	684641596	0.968348	0.910949	25.305	22267162	0.0325238	643241922	0.998725	99199542499	37.3539
SZPS0427	JI1748	880013124	0.972632	0.923553	32.52	38645170	0.0439143	806753716	0.998725	127484000000	38.0204
SZPS0428	JI1762	411917582	0.977475	0.92125	15.1875	11669675	0.0283301	390695522	0.99832	59537563676	36.6618
SZPS0429	JI1768	538265250	0.966328	0.893543	19.8501	2214258	0.00411369	525789620	0.998559	77815483400	37.3392
SZPS0430	JI1772	572832724	0.969989	0.895544	21.119	5775123	0.0100817	545976810	0.998597	82790014152	37.5708
SZPS0431	JI1774	703255974	0.972295	0.9224	25.9895	25122993	0.0357238	656421615	0.998726	101883000000	37.9916
SZPS0432	JI1775	649624670	0.95599	0.874984	24.0035	28580421	0.0439953	594677389	0.998509	94097549170	37.4708
SZPS0433	JI1791	619337668	0.955511	0.873753	22.8845	24346322	0.0393103	573943080	0.998027	89711081541	37.8659
SZPS0434	JI1792	377035384	0.951775	0.864104	13.9318	10674651	0.0283121	357657890	0.997534	54614792517	37.9726
SZPS0435	JI1793	600582162	0.971695	0.902292	22.1704	6278624	0.0104542	580780404	0.998229	86911706022	37.6411
SZPS0436	JI1800	390164536	0.968932	0.895326	14.3966	9539532	0.02445	372709029	0.997185	56437146994	36.8896
SZPS0437	JI1804	373441024	0.969278	0.89346	13.7462	8414600	0.0225326	359282543	0.998253	53887300058	36.6591
SZPS0438	JI1816	406368282	0.967915	0.893251	14.9685	999000	0.00245836	392137609	0.998082	58678865566	36.6923
SZPS0439	JI1817	447580046	0.962354	0.8777	16.5014	2179443	0.00486939	430998746	0.997722	64688067403	36.7662
SZPS0440	JI1822	482699310	0.964609	0.884247	17.8007	2286885	0.0047377	468205031	0.997965	69781443271	37.5493
SZPS0441	JI1825	436927840	0.971162	0.900468	16.132	11177714	0.0255825	417565920	0.998094	63240092705	37.2738
SZPS0442	JI1829	432818712	0.95038	0.860462	15.9935	12538466	0.0289693	408799826	0.998284	62697003835	37.8962
SZPS0443	JI1834	463498798	0.954461	0.871041	17.1261	13342696	0.0287869	439662317	0.997723	67136924307	37.6298
SZPS0444	JI1835	544371920	0.95737	0.878514	20.1135	17944368	0.0329634	512517568	0.997597	78847999338	37.5832
SZPS0445	JI1837	415136036	0.972987	0.911589	15.3427	7732748	0.018627	402288219	0.996687	60145857430	37.5046
SZPS0446	JI1846	392278012	0.971448	0.901497	14.4705	8853013	0.0225682	377730141	0.99776	56726797636	37.185
SZPS0447	JI1848	849546108	0.958176	0.880784	31.3909	29323060	0.0345161	795694180	0.997899	123058000000	38.3624
SZPS0448	JI1850	361096170	0.971596	0.902445	13.3263	6395778	0.0177121	350500901	0.997832	52241321773	37.1376
SZPS0449	JI1851	1115787702	0.981837	0.933031	41.2323	36582954	0.0327867	1050500187	0.997646	161637000000	37.4233
SZPS0450	JI1863	462758748	0.943718	0.842999	17.1012	10814710	0.0233701	443613049	0.997744	67039502326	38.0914
SZPS0451	JI1865	423437894	0.969632	0.894998	15.6031	6513470	0.0153824	413205319	0.997952	61166500295	37.3078
SZPS0452	JI1870	415619228	0.97072	0.899299	15.3377	6514921	0.0156752	405154698	0.998042	60126212489	37.2862
SZPS0453	JI1882	547459348	0.949369	0.857878	20.2301	12816286	0.0234105	525204810	0.997682	79305224713	37.9824
SZPS0454	JI1885	522353234	0.946923	0.851109	19.2977	9279721	0.0177652	507095808	0.997792	75650256593	37.6708
SZPS0455	JI1891	737439172	0.977275	0.923605	27.2537	29245254	0.0396579	683212135	0.998317	106839000000	37.5843
SZPS0456	JI1894	434037378	0.965629	0.883542	15.9834	9222088	0.0212472	418334511	0.998582	62657471121	38.3559
SZPS0457	JI1900	466077456	0.971411	0.901834	17.1925	14467840	0.0310417	439851024	0.998298	67397514139	37.4365
SZPS0458	JI1910	530747158	0.956117	0.874606	19.6128	11915500	0.0224504	509942958	0.997825	76885481970	37.8165
SZPS0459	JI1911	482900342	0.971787	0.903204	17.8271	11016702	0.0228136	463862625	0.998385	69884991375	37.3267
SZPS0460	JI1915	554789186	0.974498	0.911918	20.4578	17903105	0.0322701	522225548	0.998352	80197787651	37.8777
SZPS0461	JI1919	440995734	0.969339	0.898432	16.2754	8830970	0.0200251	425987439	0.998448	63802149533	37.9911
SZPS0462	JI1920	362931834	0.948938	0.856631	13.4094	8383222	0.0230986	348119858	0.99788	52567124744	37.8362
SZPS0463	JI1921	352922332	0.951388	0.863041	13.0405	10997855	0.0311623	332739200	0.997912	51121032588	37.7047
SZPS0464	JI1922	614959520	0.96842	0.909997	22.7293	14946663	0.0243051	589111895	0.998332	89102669606	37.909
SZPS0465	JI1933	362252038	0.95943	0.883895	13.3891	3738973	0.0103215	356880034	0.998474	52487357824	38.1678
SZPS0466	JI1946	599129648	0.960492	0.888143	22.1444	11784404	0.0196692	579682007	0.998411	86809670485	37.7839
SZPS0467	JI1947	522323942	0.966011	0.90307	19.3062	12379467	0.0237007	501081202	0.998336	75683419887	37.7788
SZPS0468	JI1948	588228734	0.976697	0.919073	21.7099	17637388	0.0299839	556466834	0.997056	85106396088	37.2347
SZPS0469	JI1956	466614314	0.971953	0.90293	17.1863	10826166	0.0232015	449029811	0.995548	67373214644	37.3321
SZPS0470	JI1962	586629082	0.973147	0.907137	21.632	13262600	0.0226082	563552578	0.998071	84801101936	38.3637
SZPS0471	JI1967	426536070	0.971298	0.901249	15.7406	10677093	0.0250321	407916807	0.997251	61705495539	37.0346
SZPS0472	JI1968	474825234	0.963002	0.894031	17.549	10660064	0.0224505	455759773	0.997549	68794912913	37.3886
SZPS0473	JI1971	452008836	0.96317	0.875322	16.6613	10990807	0.0243155	432753726	0.997546	65314876343	36.2093
SZPS0474	JI1980	422359408	0.970191	0.89714	15.5512	12049406	0.0285288	400766892	0.997304	60963160585	37.3023
SZPS0475	JI1981	550728838	0.969075	0.910456	20.3552	16986087	0.0308429	519672167	0.998059	79795712889	37.4054
SZPS0476	JI1985	480944058	0.976975	0.918273	17.7338	13384790	0.0278302	457338008	0.998033	69519228376	36.675
SZPS0477	JI1989	691701084	0.967635	0.90719	25.5666	26587309	0.0384376	643203194	0.998244	100225000000	37.7021
SZPS0478	JI1991	371199380	0.968274	0.890498	13.6949	8058271	0.0217087	357774539	0.997926	53686214353	36.7495
SZPS0479	JI1995	833831426	0.971163	0.917427	30.8159	31877282	0.0382299	775415982	0.998209	120803000000	37.5756
SZPS0480	JI1996	600241870	0.972782	0.921114	22.1821	11927098	0.0198705	580356377	0.998174	86957332474	37.5564
SZPS0481	JI2001	556912158	0.965864	0.902163	20.5844	17105263	0.0307145	526354422	0.998047	80694171666	37.6154
SZPS0482	JI2007	568502142	0.973289	0.907892	20.9664	15813374	0.0278159	540262035	0.998223	82191788461	37.3004
SZPS0483	JI2016	939025044	0.974912	0.913692	34.6514	30683853	0.0326763	882373274	0.998414	135839000000	37.7065
SZPS0484	JI2017	403331684	0.968319	0.891543	14.885	6587555	0.0163328	392229531	0.998521	58351617713	37.7086
SZPS0485	JI2018	377603566	0.969757	0.894552	13.9123	7853265	0.0207976	366519109	0.996689	54538321797	36.8687
SZPS0486	JI2036	643620730	0.97045	0.897077	23.7235	4380249	0.00680564	627380475	0.998392	92999796169	38.0113
SZPS0487	JI2048	872030740	0.96624	0.903809	32.2295	29316293	0.0336184	819055532	0.998137	126345000000	37.5994
SZPS0488	JI2058	541099874	0.969613	0.912043	19.9998	15191531	0.0280753	514008564	0.998288	78402380373	37.4069
SZPS0489	JI2061	466170832	0.970493	0.898635	17.1967	14423196	0.0309397	440807962	0.997979	67413714561	37.1884
SZPS0490	JI2081	604397994	0.9721	0.904245	22.303	15363041	0.0254187	577466560	0.998277	87431297289	37.9501
SZPS0491	JI2083	776180886	0.978061	0.926077	28.6197	27803682	0.0358211	726384753	0.997968	112194000000	37.2011
SZPS0492	JI2084	767179656	0.974389	0.914661	28.2757	14128601	0.0184163	743345400	0.998077	110845000000	38.3836
SZPS0493	JI2089	482333624	0.965985	0.896181	17.7912	16508830	0.034227	451781651	0.996193	69744273857	36.5536
SZPS0494	JI2100	677717332	0.967195	0.905656	25.0482	19273655	0.0284391	643026481	0.998412	98193165099	37.3882
SZPS0495	JI2104	651416734	0.956576	0.872907	24.0425	17445087	0.0267802	620137863	0.997403	94250506204	37.5057
SZPS0496	JI2105	738324996	0.957405	0.875083	27.2494	25415088	0.0344226	694487591	0.99697	106822000000	37.2217
SZPS0497	JI2106	608446908	0.975435	0.928145	22.4828	22865582	0.0375802	565015522	0.998474	88136198437	37.0291
SZPS0498	JI2108	633443330	0.954049	0.865705	23.3669	15233671	0.024049	605725643	0.997545	91602012377	37.2543
SZPS0499	JI2110	397918126	0.951303	0.859332	14.6852	657076	0.00165128	384220617	0.996932	57568511858	37.059
SZPS0500	JI2114	709041162	0.971371	0.914987	26.207	16984744	0.0239545	678860505	0.998613	102736000000	37.7563
SZPS0501	JI2116	881537522	0.954902	0.868305	32.5012	28283143	0.0320839	830053030	0.997682	127410000000	37.3291
SZPS0502	JI2126	902250816	0.960482	0.883617	33.2662	34155588	0.037856	838884282	0.997388	130409000000	37.1971
SZPS0503	JI2129	754815862	0.971091	0.90976	27.8159	24059475	0.0318746	711925760	0.998225	109043000000	37.3004
SZPS0504	JI2134	515183094	0.969003	0.907393	19.0426	15385671	0.0298645	487549498	0.998254	74649916307	37.3188
SZPS0505	JI2149	608311082	0.970828	0.90848	22.4602	19611022	0.0322385	573176112	0.998157	88047642702	37.1897
SZPS0506	JI2150	572743342	0.967469	0.897897	21.1235	11261189	0.0196618	554075159	0.998272	82807410756	38.3047
SZPS0507	JI2152	443608248	0.965352	0.891114	16.3808	8366185	0.0188594	429814216	0.997679	64215311813	37.3319
SZPS0508	JI2153	380408832	0.964568	0.888162	14.0315	6611668	0.0173804	369720277	0.998107	55005650796	37.1887
SZPS0509	JI2154	519089604	0.974124	0.922549	19.1853	12719674	0.0245038	497027502	0.998413	75209297048	37.5026
SZPS0510	JI2156	468831132	0.966002	0.894685	17.2175	6230765	0.01329	453204077	0.99766	67495373019	36.5041
SZPS0511	JI2157	611325922	0.969755	0.904947	22.5659	19103532	0.0312493	577021421	0.998336	88462106996	37.5439
SZPS0512	JI2160	629028366	0.972886	0.914481	23.2066	16370868	0.0260256	600050599	0.998134	90973590720	37.3604
SZPS0513	JI2174	609889804	0.971344	0.909727	22.4878	18095524	0.0296702	576593418	0.998501	88155616595	37.9148
SZPS0514	JI2177	659274136	0.97467	0.920026	24.3184	24646383	0.0373841	615253464	0.997553	95332048579	37.3476
SZPS0515	JI2182	564086598	0.972453	0.912897	20.8131	10970915	0.019449	544469289	0.998658	81590742801	37.5028
SZPS0516	JI2193	680642888	0.969327	0.903683	25.105	17925936	0.0263368	648715377	0.998414	98415813257	37.9175
SZPS0517	JI2217	740785454	0.971472	0.910211	27.3137	19785662	0.026709	706181700	0.998131	107074000000	38.0976
SZPS0518	JI2219	473888240	0.954799	0.880619	17.4544	10819645	0.0228316	454720343	0.998634	68424137379	37.4554
SZPS0519	JI2221	420118008	0.949882	0.866515	15.4989	8281409	0.0197121	405682287	0.998404	60758324417	37.9407
SZPS0520	JI2223	408223152	0.950791	0.869171	15.0466	10385872	0.0254417	389853869	0.998451	58985193185	37.7292
SZPS0521	JI2228	978982850	0.968348	0.903447	36.1171	23312767	0.0238133	650258044	0.996446	141585000000	37.0747
SZPS0522	JI2233	407343816	0.954559	0.87959	15.0068	7482030	0.0183678	394802989	0.998334	58828894096	37.8235
SZPS0523	JI2236	468607252	0.968514	0.902288	17.3203	1564637	0.00333891	459385629	0.998211	67898344803	37.1104
SZPS0524	JI2240	390469654	0.965935	0.897815	14.4326	5714684	0.0146354	380992609	0.998776	56578190288	37.7728
SZPS0525	JI2243	416847502	0.947559	0.860063	15.392	7414078	0.0177861	404597785	0.998145	60339311614	37.8478
SZPS0526	JI2257	364406802	0.950146	0.866467	13.4123	5228828	0.0143489	355933973	0.998432	52578214242	37.6873
SZPS0527	JI2262	453450196	0.956213	0.878033	16.7198	1955149	0.00431172	443224522	0.998228	65544331967	37.4979
SZPS0528	JI2273	489888224	0.967261	0.898457	18.1063	1748353	0.00356888	478354151	0.998071	70979477480	37.1703
SZPS0529	JI2274	501159882	0.968703	0.906739	18.5238	11935270	0.0238153	480126800	0.998331	72616315448	37.6338
SZPS0530	JI2277	466005676	0.953829	0.8788	17.1766	11597850	0.0248878	445238001	0.996332	67335053043	37.468
SZPS0531	JI2279	429282852	0.953917	0.8761	15.8519	8081031	0.0188245	415271267	0.996403	62142185202	37.8555
SZPS0532	JI2294	432078514	0.952267	0.873645	15.9421	6697768	0.0155013	419550505	0.996802	62495638248	37.8291
SZPS0533	JI2296	726843172	0.974886	0.925191	26.8574	20248449	0.0278581	689490924	0.99728	105285000000	38.1047
SZPS0534	JI2300	465947564	0.950293	0.868174	17.196	12420451	0.0266563	443697732	0.998124	67411207361	37.3796
SZPS0535	JI2301	523548482	0.96196	0.886375	19.3161	6116454	0.0116827	506125920	0.997332	75722298418	37.0754
SZPS0536	JI2311	455186732	0.953118	0.875114	16.7417	7594183	0.0166837	443005101	0.998216	65630167687	37.3982
SZPS0537	JI2312	443828026	0.950858	0.869089	16.3706	7730667	0.0174182	431217796	0.998235	64175329566	38.017
SZPS0538	JI2314	728048248	0.97556	0.927678	26.9053	26822060	0.036841	678749259	0.998546	105473000000	38.0733
SZPS0539	JI2317	519448590	0.962774	0.889658	19.0957	3570785	0.00687418	506944162	0.998829	74858153647	38.4322
SZPS0540	JI2321	823557304	0.954987	0.872592	30.2653	20249768	0.0245882	787581196	0.99841	118645000000	37.9043
SZPS0541	JI2324	637135142	0.966598	0.901111	23.5477	17547326	0.027541	605576403	0.998332	92310941811	37.5199
SZPS0542	JI2329	616132886	0.970629	0.912591	22.771	17927937	0.0290975	583763235	0.998386	89266086314	37.2697
SZPS0543	JI2331	554654426	0.970534	0.898228	20.4487	17588003	0.0317098	522872215	0.997455	80162199517	37.5626
SZPS0544	JI2332	696573638	0.965658	0.889877	25.716	23610370	0.033895	653663532	0.997866	100811000000	37.3397
SZPS0545	JI2344	383214104	0.970688	0.898341	14.1117	9534187	0.0248795	366854838	0.997196	55320011200	37.8354
SZPS0546	JI2345	574731150	0.963761	0.883895	21.2211	16575577	0.0288406	546191906	0.997444	83190159912	37.8013
SZPS0547	JI2348	385900990	0.969683	0.895636	14.2335	8625573	0.0223518	371213497	0.99717	55797701898	37.3554
SZPS0548	JI2349	546316816	0.964609	0.88524	20.1333	12105004	0.0221575	526024444	0.997778	78925724377	38.4816
SZPS0549	JI2350	600541318	0.969112	0.892808	22.0988	3887809	0.00647384	588711856	0.996719	86631023523	37.0099
SZPS0550	JI2353	733473882	0.971717	0.907939	27.0494	21601385	0.0294508	694997440	0.997779	106038000000	38.0242
SZPS0551	JI2355	831016490	0.974459	0.911068	30.6422	30359003	0.0365324	777563084	0.997383	120122000000	37.4158
SZPS0552	JI2366	929539396	0.96917	0.900058	34.3256	37351701	0.040183	859602135	0.998044	134562000000	37.6894
SZPS0553	JI2371	497547824	0.956891	0.883769	18.3337	8768625	0.0176237	481452003	0.998689	71870944114	37.5406
SZPS0554	JI2374	637750866	0.964388	0.894098	23.5682	11329237	0.0177644	619094414	0.998328	92391204805	37.4231
SZPS0555	JI2389	770850326	0.967102	0.902869	28.492	22095908	0.0286643	730679183	0.998433	111693000000	37.8196
SZPS0556	JI2393	672263070	0.966186	0.899505	24.8477	18484327	0.0274957	638758176	0.99853	97406944738	37.5215
SZPS0557	JI2394	605468198	0.970551	0.912266	22.3778	11564191	0.0190996	585964228	0.998015	87724467434	37.3983
SZPS0558	JI2401	983551612	0.967485	0.895862	36.3226	27619761	0.0280817	934398918	0.998006	142391000000	37.9774
SZPS0559	JI2402	494825526	0.96779	0.889896	18.2769	13968522	0.0282292	468845208	0.996968	71648311029	37.2856
SZPS0560	JI2403	549187008	0.960787	0.874302	20.2494	14275760	0.0259944	523491017	0.998308	79381085934	38.2075
SZPS0561	JI2410	349922498	0.96364	0.874726	12.9187	6224096	0.0177871	339198759	0.998065	50643410681	37.345
SZPS0562	JI2423	668823844	0.96946	0.901413	24.6909	26313973	0.0393437	621566100	0.997618	96792312490	37.3042
SZPS0563	JI2429	498345090	0.97361	0.909032	18.3575	12126282	0.0243331	478702971	0.996904	71964302992	38.1536
SZPS0564	JI2434	537645690	0.96507	0.88677	19.8441	11077603	0.0206039	517858665	0.998367	77792100444	37.7608
SZPS0565	JI2436	473040258	0.964931	0.878677	17.4598	10207510	0.0215785	455271391	0.99777	68445044176	37.6274
SZPS0566	JI2464	622622760	0.964331	0.885367	22.9899	20210348	0.03246	584689641	0.998327	90124088983	37.3967
SZPS0567	JI2500	515549010	0.964685	0.87875	19.0373	11811694	0.0229109	494381745	0.997673	74629313481	37.2638
SZPS0568	JI2501	639696738	0.975317	0.925933	23.6409	21843978	0.0341474	598986479	0.998675	92675988747	37.2587
SZPS0569	JI2559	752706354	0.965861	0.890603	27.796	14028957	0.018638	730832340	0.997716	108965000000	38.3455
SZPS0570	JI2561	684218292	0.97501	0.924983	25.2841	26071525	0.0381041	637247368	0.998009	99117729958	37.1154
SZPS0571	JI2583	646048420	0.968163	0.897914	23.8516	19155938	0.0296509	611344766	0.998039	93501972299	37.5203
SZPS0572	JI2595	676807552	0.968238	0.905104	25.0151	14532263	0.0214718	650359289	0.998255	98063385266	37.336
SZPS0573	JI2603	454421038	0.965953	0.88914	16.7477	11682997	0.0257096	435459359	0.996789	65653607447	36.7921
SZPS0574	JI2611	549875078	0.967623	0.895232	20.2886	13576256	0.0246897	527271343	0.997302	79534609876	38.4553
SZPS0575	JI2623	559274936	0.963137	0.89539	20.6082	13272828	0.0237322	535909709	0.998071	80787406860	38.4439
SZPS0576	JI2644	569347538	0.956224	0.874935	20.9689	15976850	0.0280617	540661419	0.99812	82201326975	38.3142
SZPS0577	JI2659	440776850	0.968505	0.910883	16.2594	9176231	0.0208183	424681957	0.998292	63739404595	37.7355
SZPS0578	JI2671	377681688	0.960044	0.887396	13.931	6582077	0.0174276	366599009	0.998033	54611667496	37.202
SZPS0579	JI2683	594518600	0.965286	0.901583	21.9454	10600438	0.0178303	575692521	0.997702	86029405313	38.594
SZPS0580	JI2693	600102546	0.962921	0.894658	22.1126	14876088	0.0247892	573635171	0.997812	86684784290	37.2741
SZPS0581	JI2699	449375394	0.964122	0.898054	16.5912	7566281	0.0168373	435801920	0.998537	65040237651	37.9205
SZPS0582	JI2707	546442282	0.964839	0.899595	20.0717	17327727	0.0317101	514610078	0.997955	78684316759	38.3162
SZPS0583	JI2711	584379430	0.963484	0.895251	21.398	16262943	0.0278294	554392223	0.998513	83883740761	38.0754
SZPS0584	JI2716	470999962	0.965656	0.901868	17.3625	11372820	0.0241461	451655267	0.997766	68063787837	37.1799
SZPS0585	JI2742	626197434	0.966832	0.900908	23.1446	13563646	0.0216603	603150756	0.998211	90730614338	37.6438
SZPS0586	JI2743	745399780	0.971314	0.90797	27.4721	26265137	0.0352363	697818662	0.998135	107695000000	38.1894
SZPS0587	JI2753	597897758	0.97191	0.908964	22.0357	13644843	0.0228214	574566128	0.99787	86383424947	37.8644
SZPS0588	JI2757	519133198	0.969658	0.901951	19.1147	9093981	0.0175176	503611176	0.998736	74932522221	38.4205
SZPS0589	JI2761	695349714	0.969206	0.901428	25.6745	21696913	0.0312029	656093668	0.9983	100648000000	38.0593
SZPS0590	JI2764	480496478	0.971649	0.907175	17.6749	11544824	0.0240269	460663503	0.998148	69288428250	37.7005
SZPS0591	JI2776	647251116	0.966695	0.900615	23.9227	10539065	0.0162828	630781498	0.998333	93780790878	38.0586
SZPS0592	JI2782	753217170	0.971241	0.907476	27.8018	24802954	0.0329294	707418538	0.998561	108988000000	37.4242
SZPS0593	JI2787	693620558	0.970334	0.904254	25.6083	21237850	0.0306188	654543532	0.998462	100389000000	37.2586
SZPS0594	JI2822	678231090	0.959682	0.885472	24.9204	22179998	0.0327027	637969566	0.998216	97691795437	37.0596
SZPS0595	JI3006	832177732	0.97184	0.909314	30.7113	24655313	0.0296275	792658873	0.997092	120393000000	38.1755
SZPS0596	JI3022	339252324	0.96669	0.89064	12.4874	4419756	0.0130279	333691184	0.997834	48952802257	38.2127
SZPS0597	JI3025	510437038	0.963968	0.89257	18.8653	9542449	0.0186947	496343366	0.997467	73954822153	37.5476
SZPS0598	JI3027	733109958	0.971304	0.914449	27.092	18730994	0.02555	698426402	0.998727	106205000000	37.8038
SZPS0599	JI3029	519555542	0.967129	0.892883	19.0888	10181871	0.0195973	501846704	0.998711	74831131676	38.2583
SZPS0600	JI3030	837486048	0.977144	0.931437	30.9475	27714470	0.0330925	788159977	0.998096	121319000000	37.1877
SZPS0601	JI3049	414260756	0.965524	0.887685	15.2347	6923283	0.0167124	404312046	0.997924	59722325677	38.1575
SZPS0602	JI3053	912462130	0.972035	0.917135	33.72	32819155	0.0359677	852139769	0.998498	132188000000	37.7218
SZPS0603	JI3080	450288856	0.966854	0.891686	16.5826	9172745	0.0203708	436152843	0.997556	65006378730	37.5689
SZPS0604	JI3086	768554994	0.964809	0.895087	28.4072	25004354	0.0325342	723370546	0.998319	111361000000	37.5573
SZPS0605	JI3096	570546696	0.965389	0.887655	20.9301	9217933	0.0161563	557577839	0.99761	82049343040	37.6426
SZPS0606	JI3098	665368698	0.979303	0.933202	24.4682	17584018	0.0264275	637305938	0.997775	95919473654	37.7649
SZPS0607	JI3119	934752880	0.966821	0.902198	34.5496	27873505	0.0298191	883984457	0.998636	135440000000	38.2334
SZPS0608	JI3120	698943196	0.970643	0.904766	25.6946	17250969	0.0246815	668828945	0.998477	100727000000	37.9551
SZPS0609	JI3134	450284496	0.975989	0.913951	16.57	9444309	0.0209741	434010690	0.998211	64956879325	37.4519
SZPS0610	JI3167	851940240	0.970407	0.905138	31.3728	62264351	0.0730854	733106996	0.997554	122986000000	38.0119
SZPS0611	JI3178	541228326	0.974197	0.898607	19.925	16189419	0.0299124	512111964	0.997568	78109080091	36.8334
SZPS0612	JI3179	618868798	0.978233	0.911212	22.7717	22722187	0.0367157	577125458	0.997298	89268737227	36.7986
SZPS0613	JI3186	643739586	0.961443	0.885842	23.6381	13965406	0.0216942	620117267	0.998341	92665104469	38.1634
SZPS0614	JI3604	599464276	0.969506	0.909347	22.1526	8966333	0.0149572	585388955	0.998275	86841674391	37.2153
SZPS0615	JI3605	551462158	0.957275	0.873881	20.3119	14568112	0.0264172	525316234	0.998148	79625924411	37.9737
SZPS0616	JI3609	503466250	0.958772	0.877068	18.4549	11062039	0.0219718	484414639	0.998142	72346364525	37.1488
SZPS0617	JI3610	502860722	0.958496	0.875737	18.4874	11589167	0.0230465	482495216	0.998172	72473472040	37.1807
SZPS0618	JI3611	461012992	0.964848	0.894787	16.8651	10522905	0.0228256	442434303	0.998083	66114043900	37.6732
SZPS0619	JI3614	595948352	0.959471	0.885124	21.8808	12648378	0.0212239	573678825	0.998563	85776402026	37.524
SZPS0620	JI3639	565951458	0.959992	0.885825	20.8088	13612774	0.0240529	570785115	0.99836	81573729912	37.8321
SZPS0621	JI2548	622177150	0.965863	0.89015	22.9711	21147270	0.0339891	586056715	0.997047	90050293248	37.2137
SZPS0622	JI2647	773493166	0.965264	0.896747	28.5862	25587645	0.0330806	727177177	0.998399	112063000000	37.4878
SZPS0623	JI2648	588932724	0.961317	0.89078	21.7428	15836466	0.0268901	560643275	0.998152	85235421965	38.3414
SZPS0624	JI2649	519171034	0.972001	0.913469	19.1384	4362275	0.00840239	502687012	0.998152	75025621433	37.4349
	AGG3732	341325852			13.4851	38612828	0.113126	339837639	0.99564	51198877800
	E11	270386292			10.6384	15352453	0.0567797	269618731	0.997161	40390840879
	E110	341606862			13.4573	20804917	0.0609031	339587865	0.99409	51093170697
	E212	276512392			10.8862	20381148	0.0737079	274623020	0.993167	41331610448
	E213	288133144			11.3342	17416813	0.0604471	285881854	0.992187	43032552488
	E214	841922932			33.2162	57270460	0.0680234	835583308	0.99247	126112031572
	E215	302840512			11.9174	18629507	0.0615159	300882172	0.993533	45246979903
	E216	289746706			11.3978	19312603	0.0666534	287814116	0.99333	43273979174
	E217	293850424			11.56	17799931	0.0605748	291952630	0.993542	43889982021
	E218	281795478			11.0649	21271303	0.0754849	280284342	0.994637	42010018563
	E28	281254002			11.0435	19180735	0.0681972	278917932	0.991694	41928807885
	E310	286976148			11.2913	19067011	0.0664411	284895335	0.992749	42869769116
	E32	298300776			11.7533	20415705	0.06844	297346801	0.996802	44623700985
	E320	290351302			11.4416	20773648	0.0715466	288679120	0.994241	43440170115
	E38	311765454			12.2771	21454607	0.0688165	309781911	0.993638	46612582030
	E39	283718572			11.1806	20622396	0.0726861	282090015	0.99426	42449513505
	E412	903354612			35.641	30372679	0.0336221	900799317	0.997171	135318043106
	E414	878126294			34.6468	44316224	0.0504668	875119076	0.996575	131543342475
	E417	910761552			35.9461	45735075	0.0502163	905423659	0.994139	136476723494
	E418	867526310			34.2437	43263797	0.0498703	862303361	0.993979	130012924271
	E419	267488172			10.5254	18184274	0.0679816	265557707	0.992783	39961849336
	E41	881507154			34.7966	61113745	0.0693287	879261422	0.997452	132112241282
	E42	318524676			12.5462	20487475	0.0643199	317373942	0.996387	47634029707
	E420	294596074			11.6029	21360071	0.0725063	292838476	0.994034	44052762860
	E43	328011412			12.9222	21038685	0.0641401	326044567	0.994004	49061781281
	E47	298655672			11.7488	17827474	0.0596924	297715055	0.99685	44606614932
	E48	292170834			11.4945	17937127	0.0613926	289985000	0.992519	43641302226
	E49	288137198			11.3493	21611298	0.0750035	286356574	0.99382	43089948156
	E510	310018110			12.1932	17515930	0.0564997	308992466	0.996692	46294018925
	E511	280328854			11.0252	16106547	0.0574559	279289032	0.996291	41859520069
	E54	294210636			11.568	14971144	0.0508858	293010231	0.99592	43920349089
	E57	298917832			11.7716	20390291	0.0682137	297085638	0.993871	44693421155
	E59	297090420			11.7008	20516292	0.0690574	295273540	0.993884	44424247376
	E615	299958400			11.8052	19489677	0.0649746	297822899	0.992881	44820791165
	E617	287404918			11.3094	15454395	0.0537722	286275047	0.996069	42938290299
	E62	275784778			10.8444	15720532	0.0570029	274660540	0.995923	41173082186
	E63	302144080			11.8918	18629600	0.061658	300024995	0.992987	45149642739
	E64	311704654			12.2648	18524545	0.0594298	309430952	0.992706	46565692234
	E66	327884880			12.9021	18981026	0.0578893	325518050	0.992782	48985310500
	E67	310418288			12.2198	21312699	0.068658	308169199	0.992755	46394766081
	PI 344538	390223400			15.4169	47476530	0.121665	388031601	0.994383	58533510000
	W11	287268620			11.2867	18965762	0.066021	285032915	0.992217	42852262523
	W111	305285038			12.0123	16178184	0.0529937	304353781	0.99695	45607063220
	W118	306037484			12.0424	20231404	0.0661076	303793369	0.992667	45721221508
	W12	300458720			11.8199	18055286	0.0600924	298161498	0.992354	44876802983
	W13	294373060			11.5813	17957404	0.0610022	292468215	0.993529	43970712316
	W14	303657248			11.9535	18610302	0.0612872	301660436	0.993424	45383740262
	W16	321359166			12.6562	20830083	0.0648187	319259957	0.993468	48051821484
	W210B	289643404			11.4073	21443518	0.0740342	288934917	0.997554	43310111140
	W218B	323421152			12.7511	23471449	0.0725724	322535624	0.997262	48412170326
	W22	287385680			11.3106	15818829	0.0550439	286354351	0.996411	42943121659
	W317B	323675302			12.7522	21945477	0.0678009	322844557	0.997433	48416412558
	W320B	283548742			11.1321	8057151	0.0284154	282630530	0.996762	42265154281
	W33B	270987866			10.6569	7393389	0.0272831	270151558	0.996914	40460949048
	W34A	306387212			12.0784	22899993	0.074742	305784833	0.998034	45858130933
	W34B	307190974			12.1102	23159926	0.0753926	306451050	0.997591	45978946464
	W39A	290321644			11.4397	22600756	0.0778473	289563290	0.997388	43433203827
	W411A	305375448			12.0323	21337987	0.0698746	304399184	0.996803	45683207755
	W414A	853653378			33.6989	44665706	0.052323	849820372	0.99551	127944681516
	W414B	314245088			12.3766	22014628	0.0700556	313281474	0.996934	46990111639
	W420A	269935898			10.6345	21229703	0.0786472	269061187	0.99676	40376026802
	W45A	942205896			37.1918	47822131	0.0507555	939006748	0.996605	141206048076
	W49B	913188480			36.0474	93944265	0.102875	909921386	0.996422	136861238196
	W511A	937779538			37.0176	47525729	0.050679	934436186	0.996435	140544869525
	W515A	328631380			12.9586	23730669	0.0722106	327664841	0.997059	49200011072
	W517A	303772252			11.9783	23744358	0.078165	302951229	0.997297	45478099627
	W519A	335923902			13.2443	23943850	0.0712776	334940145	0.997071	50284455073
	W51B	353285208			13.9269	23859399	0.0675358	352466525	0.997683	52876145002
	W520A	287860838			11.3506	23456830	0.0814867	287003045	0.99702	43094843921
	W52B	304742500			12.0105	21829741	0.0716334	303894848	0.997218	45600101253
	W56B	268840970			10.5974	22013720	0.0818838	268181409	0.997547	40235024347
	W616A	340736856			13.4252	20964585	0.0615272	338648871	0.993872	50971479220
	W65B	287522358			11.3247	20302931	0.0706134	287000379	0.998185	42996517140
	W66A	322770932			12.72	22686504	0.0702867	321906012	0.99732	48293934261
	ZB138	276473234			10.8986	22815954	0.082525	276330716	0.999485	41378552440
	ZB148	349049410			13.7531	23454689	0.0671959	348468778	0.998337	52216553613

## Sheet: Table S3
Supplementary Table 3a. SNPs called based on ZW6 genome reference. Summary statistic of the whole-genome SNPs called in this study. Statistic number are given for raw SNPs and high-quality SNP datasets after a series of quality control processes, this includes the bi-allelic filtering, hard filtering (see the parameters at the end of this table), Inbreeding Coefficient control (see the parameters…
Reference genome：ZW6
	Chromosome Length (bp)	# of total Raw SNPs	Bi-allelic filtering			Hard Filtering			Inbreeding Coefficient control				Population Missing rate control (>20% missing rate)			Minor Allele Frequency (MAF) control (<0.01)
Chromosome			# of Discard	# of Retain	% of Discard (/raw)	# of Discard	# of Retain	% of Discard (/raw)	Fmedian	# of Discard	# of Retain	% of Discard (/raw)	# of Discard	# of Retain	% of Discard (/raw)	# of Discard	# of Retain	% of Discard (/raw)
chr1	463644500	76392551	12454259	63938292	0.16303	34324175	29614117	0.449313	0.973	9778759	19835358	0.128007	2702708	17132650	0.0353792	9198073	7934577	0.120405
chr2	492729000	80164684	12709400	67455284	0.158541	37061469	30393815	0.462317	0.971	10937037	19456778	0.136432	3613130	15843648	0.0450713	8733772	7109876	0.108948
chr3	535674373	91274091	14864968	76409123	0.162861	42616549	33792574	0.466907	0.973	12303495	21489079	0.134797	3678090	17810989	0.0402972	9766319	8044670	0.107
chr4	501613000	85726504	14238906	71487598	0.166097	38521700	32965898	0.449356	0.976	11106599	21859299	0.129559	3558470	18300829	0.0415096	9810823	8490006	0.114443
chr5	652929960	111944448	18534143	93410305	0.165566	51010622	42399683	0.455678	0.973	14814143	27585540	0.132335	4093789	23491751	0.0365698	12720852	10770899	0.113635
chr6	523395090	87825660	14230943	73594717	0.162036	40056744	33537973	0.456094	0.975	11301848	22236125	0.128685	3173512	19062613	0.0361342	10354988	8707625	0.117904
chr7	549106000	92814426	15332409	77482017	0.165194	43478545	34003472	0.468446	0.973	11658240	22345232	0.125608	3951173	18394059	0.0425707	9703054	8691005	0.104543
In total	3719091923	626142364	102365028	523777336	0.163332	287069804	236707532	0.458302	0.973429	81900121	154807411	0.130775	24770872	130036539	0.0396474	70287881	59748658	0.112411
Supplementary Table 3b. SNPs called based on the Cameor genome reference. The quality control processes and statistic is the same with supplementary table 3a.
			Bi-allelic filtering			Hard Filtering			Inbreeding Coefficient control				Population Missing rate control			Minor Allele Frequency (MAF) control
Chromosome	Chromosome Length (bp)	# of total Raw SNPs	# of Discard	# of Retain	% of Discard (/raw)	# of Discard	# of Retain	% of Discard (/raw)	Fmedian	# of Discard	# of Retain	% of Discard (/raw)	# of Discard	# of Retain	% of Discard (/raw)	# of Discard	# of Retain	% of Discard (/raw)
chr1	463644500	56923179	12351141	44572038	0.216979	16176709	28395329	0.284185	0.973	9863467	18531862	0.173277	2654514	15877348	0.0466333	9749590	6127758	0.171276
chr2	492729000	58810801	12457901	46352900	0.21183	18182065	28170835	0.309162	0.971	10853921	17316914	0.184557	3242362	14074552	0.0551321	8703721	5370831	0.147995
chr3	535674373	63930186	13814485	50115701	0.216087	19256377	30859324	0.301209	0.974	12105385	18753939	0.189353	2980472	15773467	0.0466207	9886885	5886582	0.154651
chr4	501613000	66101257	14364584	51736673	0.217312	19221408	32515265	0.290787	0.977	12144936	20370329	0.183732	3204217	17166112	0.0484744	10574067	6592045	0.159968
chr5	652929960	86575414	18844870	67730544	0.21767	25597983	42132561	0.295673	0.973	15845462	26287099	0.183025	3850303	22436796	0.0444734	13864681	8572115	0.160146
chr6	523395090	69419706	14948976	54470730	0.215342	20665704	33805026	0.297692	0.974	12315442	21489584	0.177406	2987855	18501729	0.0430404	11409954	7091775	0.164362
chr7	549106000	72885832	16020134	56865698	0.219798	21685721	35179977	0.29753	0.973	13173999	22005978	0.180748	3847063	18158915	0.052782	10965287	7193628	0.150445
total/average	3719091923	474646375	102802091	371844284	0.216587	140785967	231058317	0.296612	0.973571	86302612	144755705	0.181825	22766786	121988919	0.0479658	75154185	46834734	0.158337
Notes:
#Hard Filter criteria:
SNP: QD < 2.0 || FS > 60.0 || MQ < 40.0 || MQRankSum < -12.5 || ReadPosRankSum < -8.0 || SOR > 3.0
#Inbreeding Coefficient Filter:
The Inbreeding Coeffcient(F) is computed as:
F = 1 - (Hobs/Hexp) ,Which Hobs is the frequency of heterozygous calls , and Hexp is computed as:
Hexp = 2p(1-p) ,Which p is the frequency of non-reference allele (or the frequency of reference allele).
Step1. The median value of F(Fmedian) for each chromosome is calculated using the SNP site of F>0 and MAF>0.05.
Step2. The max observed heterozygous frequency(Hobs_max) is computed as :
Hobs_max = 10*(1-Fmedian)*Hexp
The site of Hobs>Hobs_max were discarded.
#Missing Filter criteria:
SNP: Missing rate > 20%
#Minor Allele Frequency Filter:
SNP: MAF < 0.01

## Sheet: Table S4
Supplementary Table 4. SNP annotation to specify the SNP location in the different genic or genomic structural elements, and predict the putative functional significance . Details were given on the SNP numbers distributed in different genomic structural elements (ZW6-based) with regard to the predicted putative functional significance. The SNPs used here come from the final filtering step with Mi…
Chromosome	Variants	upstream	downstream	intergenic	intron	splice_acceptor*	splice_donor*	splice_region	start_lost*	stop_gained*	stop_lost*	stop_retained	missense_variant*	synonymous_variant
chr1	7934577	1219989	1151892	7553308	404635	250	255	11006	167	1687	183	150	72252	80142
chr2	7109876	1038566	1001907	6790930	338390	233	219	9385	172	1497	182	140	60083	68276
chr3	8044670	1186144	1122255	7692504	366091	284	229	10045	154	1647	210	118	65831	74305
chr4	8490006	1336559	1263907	8082818	451906	276	235	12713	180	1764	184	169	75768	89075
chr5	10770899	1740084	1666940	10253100	568072	335	327	16182	305	2265	334	221	98692	116433
chr6	8707625	1404015	1371024	8267788	484747	296	278	13414	199	1738	216	182	78301	92519
chr7	8691005	1393448	1309482	8268312	452480	277	286	12756	171	1637	212	193	76738	91499
total	59748658	9318805	8887407	56908760	3066321	1951	1829	85501	1348	12235	1521	1173	527665	612249

## Sheet: Table S5
Supplementary Table 5. The ADMIXTURE results of the pea population in this study, when K=3, K =5, and K=8. This table corressponds to Figure 1b.
			subspecies							types								K=3			K=5					K=8								Group order
final order	accessions	taxon	P. abyssinicum	P. elatius	P. fulvum	P. humile	P. sativum	P. sativum ssp jomardii	P. sativum transcaucasicum	P. fulvum	P. elatius	other wild	P. abyssinicum	landrace	cultivar	other	types	K3-average-1	K3-average-2	K3-average-3	K5-averaged-1	K5-averaged-2	K5-averaged-3	K5-averaged-4	K5-averaged-5	G5	G2	G3	G4	G1	G6	G8	G7	1	2	3	4	5	6	7	8	9	0	11	12	13	14	15	16
1	JI1453	P. sativum	0	0	0	0	1	0	0	0	0	0	0	1	0	0	landrace	0.837829	0.162161	1e-05	0.93109	1e-05	1e-05	0.0688803	1e-05	1e-05	1e-05	1e-05	1e-05	0.99993	1e-05	1e-05	1e-05	0	0	0	0	1	0	0	0	0	0	0	0	0	0	0	0
2	JI1519	P. sativum	0	0	0	0	1	0	0	0	0	0	0	1	0	0	landrace	0.844256	0.155734	1e-05	0.919765	1e-05	1e-05	0.0802053	1e-05	1e-05	1e-05	1e-05	1e-05	0.99993	1e-05	1e-05	1e-05	0	0	0	0	1	0	0	0	0	0	0	0	0	0	0	0
3	JI1464	P. sativum	0	0	0	0	1	0	0	0	0	0	0	1	0	0	landrace	0.822722	0.177268	1e-05	0.914171	1e-05	1.23333e-05	0.0857963	1e-05	1e-05	1e-05	1e-05	1e-05	0.99993	1e-05	1e-05	1e-05	0	0	0	0	1	0	0	0	0	0	0	0	0	0	0	0
4	JI1469	P. sativum	0	0	0	0	1	0	0	0	0	0	0	1	0	0	landrace	0.824044	0.175946	1e-05	0.913286	1e-05	1e-05	0.0866837	1e-05	1e-05	1e-05	1e-05	1e-05	0.99993	1e-05	1e-05	1e-05	0	0	0	0	1	0	0	0	0	0	0	0	0	0	0	0
5	JI1529	P. sativum	0	0	0	0	1	0	0	0	0	0	0	1	0	0	landrace	0.809739	0.190251	1e-05	0.904314	1e-05	1.26667e-05	0.0956507	1.2e-05	1e-05	1e-05	1e-05	1e-05	0.99993	1e-05	1e-05	1e-05	0	0	0	0	1	0	0	0	0	0	0	0	0	0	0	0
6	JI1967	P. sativum	0	0	0	0	1	0	0	0	0	0	0	1	0	0	landrace	0.821805	0.178185	1e-05	0.899981	1e-05	1e-05	0.0999887	1e-05	1e-05	1e-05	1e-05	1e-05	0.99993	1e-05	1e-05	1e-05	0	0	0	0	1	0	0	0	0	0	0	0	0	0	0	0
7	JI1991	P. sativum	0	0	0	0	1	0	0	0	0	0	0	1	0	0	landrace	0.784606	0.215384	1e-05	0.860766	1e-05	1e-05	0.139204	1e-05	1e-05	1e-05	1e-05	1e-05	0.99993	1e-05	1e-05	1e-05	0	0	0	0	1	0	0	0	0	0	0	0	0	0	0	0
8	JI1592	P. sativum	0	0	0	0	1	0	0	0	0	0	0	1	0	0	landrace	0.770697	0.229293	1e-05	0.847744	1e-05	1e-05	0.152226	1e-05	1e-05	1e-05	1e-05	1e-05	0.99993	1e-05	1e-05	1e-05	0	0	0	0	1	0	0	0	0	0	0	0	0	0	0	0
9	JI1587	P. sativum	0	0	0	0	1	0	0	0	0	0	0	1	0	0	landrace	0.739979	0.260011	1e-05	0.827026	1e-05	1e-05	0.172944	1e-05	1e-05	1e-05	1e-05	1e-05	0.99993	1e-05	1e-05	1e-05	0	0	0	0	1	0	0	0	0	0	0	0	0	0	0	0
10	JI0968	P. sativum	0	0	0	0	1	0	0	0	0	0	0	1	0	0	landrace	0.815182	0.184808	1e-05	0.890831	1e-05	1e-05	0.109139	1e-05	1e-05	1e-05	1.1e-05	1e-05	0.999929	1e-05	1e-05	1e-05	0	0	0	0	1	0	0	0	0	0	0	0	0	0	0	0
11	JI1989	P. sativum	0	0	0	0	1	0	0	0	0	0	0	1	0	0	landrace	0.803503	0.196487	1e-05	0.881602	1e-05	1.13333e-05	0.118367	1e-05	1.3e-05	1e-05	1e-05	1e-05	0.999926	1e-05	1e-05	1e-05	0	0	0	0	1	0	0	0	0	0	0	0	0	0	0	0
12	JI1585	P. sativum	0	0	0	0	1	0	0	0	0	0	0	1	0	0	landrace	0.848824	0.151166	1e-05	0.953486	1e-05	1e-05	0.0464843	1e-05	1e-05	1e-05	1e-05	1e-05	0.999924	1.6e-05	1e-05	1e-05	0	0	0	0	1	0	0	0	0	0	0	0	0	0	0	0
13	JI1663	P. sativum	0	0	0	0	1	0	0	0	0	0	0	1	0	0	landrace	0.85713	0.14286	1e-05	0.944647	1e-05	1e-05	0.0553227	1e-05	1e-05	1e-05	1e-05	1e-05	0.999924	1.6e-05	1e-05	1e-05	0	0	0	0	1	0	0	0	0	0	0	0	0	0	0	0
14	JI1581	P. sativum	0	0	0	0	1	0	0	0	0	0	0	1	0	0	landrace	0.8109	0.18909	1e-05	0.895693	1e-05	1e-05	0.104277	1e-05	1e-05	1e-05	1e-05	1e-05	0.999923	1.7e-05	1e-05	1e-05	0	0	0	0	1	0	0	0	0	0	0	0	0	0	0	0
15	JI1588	P. sativum	0	0	0	0	1	0	0	0	0	0	0	1	0	0	landrace	0.807392	0.192598	1e-05	0.893857	1e-05	1e-05	0.106113	1e-05	1e-05	1e-05	1e-05	1e-05	0.999923	1.7e-05	1e-05	1e-05	0	0	0	0	1	0	0	0	0	0	0	0	0	0	0	0
16	JI1947	P. sativum	0	0	0	0	1	0	0	0	0	0	0	1	0	0	landrace	0.857657	0.142333	1e-05	0.935571	1e-05	1e-05	0.064399	1e-05	1.5e-05	1e-05	1e-05	1e-05	0.999922	1e-05	1e-05	1.2e-05	0	0	0	0	1	0	0	0	0	0	0	0	0	0	0	0
17	JI1948	P. sativum	0	0	0	0	1	0	0	0	0	0	0	1	0	0	landrace	0.837408	0.162582	1e-05	0.922159	1e-05	1.13333e-05	0.07781	1e-05	1.4e-05	1e-05	1.1e-05	1e-05	0.99992	1e-05	1.6e-05	1e-05	0	0	0	0	1	0	0	0	0	0	0	0	0	0	0	0
18	JI1260	P. sativum	0	0	0	0	1	0	0	0	0	0	0	1	0	0	landrace	0.899608	0.100382	1e-05	0.902253	0.0614267	1e-05	0.0363	1.03333e-05	0.111564	1e-05	1e-05	1e-05	0.888375	1.1e-05	1e-05	1e-05	0	0	0	0	1	0	0	0	0	0	0	0	0	0	0	0
19	JI1366	P. sativum	0	0	0	0	1	0	0	0	0	0	0	1	0	0	landrace	0.875893	0.124097	1e-05	0.917826	0.013186	1e-05	0.068968	1e-05	0.063666	0.053899	1e-05	1e-05	0.882384	1e-05	1e-05	1e-05	0	0	0	0	1	0	0	0	0	0	0	0	0	0	0	0
20	JI1265	P. sativum	0	0	0	0	1	0	0	0	0	0	0	1	0	0	landrace	0.863165	0.136825	1e-05	0.889123	0.038087	1e-05	0.0727697	1e-05	0.07346	0.08088	1e-05	1e-05	0.845609	1e-05	1e-05	1e-05	0	0	0	0	1	0	0	0	0	0	0	0	0	0	0	0
21	JI1434	P. sativum	0	0	0	0	1	0	0	0	0	0	0	1	0	0	landrace	0.914783	0.0852072	1e-05	0.96456	0.009825	1e-05	0.025595	1e-05	0.087919	0.103058	1e-05	1e-05	0.808972	1e-05	1e-05	1e-05	0	0	0	0	1	0	0	0	0	0	0	0	0	0	0	0
22	JI1523	P. sativum	0	0	0	0	1	0	0	0	0	0	0	1	0	0	landrace	0.880434	0.119556	1e-05	0.972043	1e-05	1e-05	0.0279273	1e-05	0.043879	0.167375	1e-05	1e-05	0.788697	1e-05	1e-05	1e-05	0	0	0	0	1	0	0	0	0	0	0	0	0	0	0	0
23	JI1607	P. sativum	0	0	0	0	1	0	0	0	0	0	0	1	0	0	landrace	0.879232	0.120758	1e-05	0.971115	1e-05	1e-05	0.0288553	1e-05	0.044471	0.167089	1e-05	1e-05	0.788391	1e-05	1e-05	1e-05	0	0	0	0	1	0	0	0	0	0	0	0	0	0	0	0
24	JI2001	P. sativum	0	0	0	0	1	0	0	0	0	0	0	1	0	0	landrace	0.882865	0.117125	1e-05	0.974095	1e-05	1e-05	0.0258753	1e-05	0.045491	0.167582	1e-05	1e-05	0.786877	1e-05	1e-05	1e-05	0	0	0	0	1	0	0	0	0	0	0	0	0	0	0	0
25	JI0237	P. sativum	0	0	0	0	1	0	0	0	0	0	0	1	0	0	landrace	0.877931	0.122059	1e-05	0.882758	0.0663857	1e-05	0.0508363	1e-05	0.132556	0.064081	1e-05	0.045124	0.758199	1e-05	1e-05	1e-05	0	0	0	0	1	0	0	0	0	0	0	0	0	0	0	0
26	JI0222	P. sativum	0	0	0	0	1	0	0	0	0	0	0	1	0	0	landrace	0.877243	0.122747	1e-05	0.903611	0.040246	1e-05	0.056123	1e-05	0.097608	1e-05	0.15775	1e-05	0.744592	1e-05	1e-05	1e-05	0	0	0	0	1	0	0	0	0	0	0	0	0	0	0	0
27	JI2742	P. sativum	0	0	0	0	1	0	0	0	0	0	0	0	1	0	cultivar	0.899333	0.100657	1e-05	0.938993	0.0153597	1e-05	0.0456273	1e-05	0.076513	0.043254	0.144228	1e-05	0.735965	1e-05	1e-05	1e-05	0	0	0	0	1	0	0	0	0	0	0	0	0	0	0	0
28	JI1263	P. sativum	0	0	0	0	1	0	0	0	0	0	0	1	0	0	landrace	0.876082	0.123908	1e-05	0.929459	0.014304	1e-05	0.056218	1e-05	0.084651	0.038543	0.140871	0.002209	0.733688	1.7e-05	1e-05	1e-05	0	0	0	0	1	0	0	0	0	0	0	0	0	0	0	0
29	JI2743	P. sativum	0	0	0	0	1	0	0	0	0	0	0	0	0	1	other	0.834196	0.165794	1e-05	0.802817	0.0996117	1e-05	0.0975517	1e-05	0.143224	1e-05	0.121821	1e-05	0.710104	0.024811	1e-05	1e-05	0	0	0	0	1	0	0	0	0	0	0	0	0	0	0	0
30	JI0223	P. sativum	0	0	0	0	1	0	0	0	0	0	0	1	0	0	landrace	0.699297	0.300693	1e-05	0.738869	0.016383	1e-05	0.244728	1e-05	0.060505	0.101656	1.6e-05	1e-05	0.668769	0.169022	1e-05	1.2e-05	0	0	0	0	1	0	0	0	0	0	0	0	0	0	0	0
31	JI2355	P. sativum	0	0	0	0	1	0	0	0	0	0	0	1	0	0	landrace	0.506314	0.493676	1e-05	0.52216	0.0178673	1e-05	0.459953	1e-05	1e-05	1e-05	1e-05	1e-05	0.648629	0.351311	1e-05	1e-05	0	0	0	0	1	0	0	0	0	0	0	0	0	0	0	0
32	JI0176	P. sativum	0	0	0	0	1	0	0	0	0	0	0	1	0	0	landrace	0.897399	0.102591	1e-05	0.952393	1e-05	1e-05	0.0475767	1e-05	1e-05	0.375871	1e-05	1e-05	0.624069	1e-05	1e-05	1e-05	0	0	0	0	1	0	0	0	0	0	0	0	0	0	0	0
33	JI0175	P. sativum	0	0	0	0	1	0	0	0	0	0	0	1	0	0	landrace	0.89868	0.10131	1e-05	0.953285	1e-05	1e-05	0.046685	1e-05	1.6e-05	0.377044	1e-05	1e-05	0.62289	1e-05	1e-05	1e-05	0	0	0	0	1	0	0	0	0	0	0	0	0	0	0	0
34	JI1462	P. sativum	0	0	0	0	1	0	0	0	0	0	0	1	0	0	landrace	0.914654	0.0853364	1e-05	0.817566	0.134618	1e-05	0.0477957	1e-05	0.191287	0.107169	0.098907	0.015629	0.586977	1e-05	1e-05	1e-05	0	0	0	0	1	0	0	0	0	0	0	0	0	0	0	0
35	JI1996	P. sativum	0	0	0	0	1	0	0	0	0	0	0	1	0	0	landrace	0.924421	0.0755688	1e-05	0.995885	1e-05	1e-05	0.00408467	1e-05	1e-05	0.41521	1e-05	1e-05	0.58473	1e-05	1e-05	1e-05	0	0	0	0	1	0	0	0	0	0	0	0	0	0	0	0
36	JI0220	P. sativum	0	0	0	0	1	0	0	0	0	0	0	1	0	0	landrace	0.923545	0.0764454	1e-05	0.899503	0.072501	1e-05	0.027976	1e-05	0.135478	0.07188	0.21486	1e-05	0.577743	1e-05	1e-05	1e-05	0	0	0	0	1	0	0	0	0	0	0	0	0	0	0	0
37	JI1985	P. sativum	0	0	0	0	1	0	0	0	0	0	0	1	0	0	landrace	0.900883	0.0991068	1e-05	0.920531	0.03956	1e-05	0.0398893	1e-05	0.048452	0.38136	1e-05	1e-05	0.570138	1e-05	1e-05	1e-05	0	0	0	0	1	0	0	0	0	0	0	0	0	0	0	0
38	JI1266	P. sativum	0	0	0	0	1	0	0	0	0	0	0	1	0	0	landrace	0.883906	0.116084	1e-05	0.957171	1e-05	1e-05	0.0427993	1e-05	0.016227	0.232969	0.184702	1e-05	0.566061	1e-05	1e-05	1e-05	0	0	0	0	1	0	0	0	0	0	0	0	0	0	0	0
39	JI2217	P. sativum	0	0	0	0	1	0	0	0	0	0	0	0	0	1	other	0.848608	0.151382	1e-05	0.728904	0.166852	1e-05	0.104224	1e-05	0.184059	0.181993	0.045831	0.02349	0.550868	0.013739	1e-05	1e-05	0	0	0	0	1	0	0	0	0	0	0	0	0	0	0	0
40	JI1946	P. sativum	0	0	0	0	1	0	0	0	0	0	0	1	0	0	landrace	0.888076	0.111914	1e-05	0.926738	0.0313787	1e-05	0.041864	1e-05	0.040834	0.362511	1e-05	0.049682	0.546933	1e-05	1e-05	1e-05	0	0	0	0	1	0	0	0	0	0	0	0	0	0	0	0
41	JI0221	P. sativum	0	0	0	0	1	0	0	0	0	0	0	1	0	0	landrace	0.708812	0.291178	1e-05	0.777331	1e-05	1.06667e-05	0.222638	1e-05	1e-05	1e-05	0.009904	0.310364	0.535475	0.144216	1e-05	1e-05	0	0	0	0	1	0	0	0	0	0	0	0	0	0	0	0
42	JI1590	P. sativum	0	0	0	0	1	0	0	0	0	0	0	1	0	0	landrace	0.90468	0.0953096	1e-05	0.951219	1e-05	0.0264083	0.022352	1e-05	1e-05	0.454022	1.7e-05	0.019101	0.52682	1e-05	1e-05	1e-05	0	0	0	0	1	0	0	0	0	0	0	0	0	0	0	0
43	JI0949	P. sativum	0	0	0	0	1	0	0	0	0	0	0	1	0	0	landrace	0.883193	0.116797	1e-05	0.866046	0.06726	1e-05	0.0666743	1e-05	0.073439	0.375516	2e-05	1e-05	0.523473	0.027522	1e-05	1e-05	0	0	0	0	1	0	0	0	0	0	0	0	0	0	0	0
44
45
46
47	JI0166	P. sativum	0	0	0	0	1	0	0	0	0	0	0	1	0	0	landrace	0.99998	1e-05	1e-05	0.99996	1e-05	1e-05	1e-05	1e-05	1e-05	0.99993	1e-05	1e-05	1e-05	1e-05	1e-05	1e-05	0	1	0	0	0	0	0	0	0	0	0	0	0	0	0	0
48	JI0167	P. sativum	0	0	0	0	1	0	0	0	0	0	0	1	0	0	landrace	0.99998	1e-05	1e-05	0.99996	1e-05	1e-05	1e-05	1e-05	1e-05	0.99993	1e-05	1e-05	1e-05	1e-05	1e-05	1e-05	0	1	0	0	0	0	0	0	0	0	0	0	0	0	0	0
49	JI1920	P. sativum	0	0	0	0	1	0	0	0	0	0	0	1	0	0	landrace	0.99998	1.02e-05	1e-05	0.994535	0.00543533	1e-05	1e-05	1e-05	1e-05	0.99993	1e-05	1e-05	1e-05	1e-05	1e-05	1e-05	0	1	0	0	0	0	0	0	0	0	0	0	0	0	0	0
50	JI1921	P. sativum	0	0	0	0	1	0	0	0	0	0	0	1	0	0	landrace	0.999979	1.06e-05	1e-05	0.980092	0.019878	1e-05	1e-05	1.03333e-05	1e-05	0.99993	1e-05	1e-05	1e-05	1e-05	1e-05	1e-05	0	1	0	0	0	0	0	0	0	0	0	0	0	0	0	0
51	JI2236	P. sativum	0	0	0	0	1	0	0	0	0	0	0	0	0	1	other	0.999979	1.06e-05	1e-05	0.964973	0.0349967	1e-05	1e-05	1.03333e-05	1e-05	0.99993	1e-05	1e-05	1e-05	1e-05	1e-05	1e-05	0	1	0	0	0	0	0	0	0	0	0	0	0	0	0	0
52	JI1891	P. sativum	0	0	0	0	1	0	0	0	0	0	0	1	0	0	landrace	0.999979	1.08e-05	1e-05	0.950496	0.0494727	1e-05	1e-05	1.1e-05	1e-05	0.99993	1e-05	1e-05	1e-05	1e-05	1e-05	1e-05	0	1	0	0	0	0	0	0	0	0	0	0	0	0	0	0
53	JI2116	P. sativum	0	0	0	0	1	0	0	0	0	1	0	0	0	0	other wild	0.951663	0.0483272	1e-05	0.943218	1e-05	0.056752	1e-05	1e-05	1e-05	0.99993	1e-05	1e-05	1e-05	1e-05	1e-05	1e-05	0	1	0	0	0	0	0	0	0	0	0	0	0	0	0	0
54	JI2115	P. elatius	0	1	0	0	0	0	0	0	1	0	0	0	0	0	P. elatius	0.951473	0.0485174	1e-05	0.94309	1e-05	0.0568803	1e-05	1e-05	1e-05	0.99993	1e-05	1e-05	1e-05	1e-05	1e-05	1e-05	0	1	0	0	0	0	0	0	0	0	0	0	0	0	0	0
55	JI1900	P. sativum	0	0	0	0	1	0	0	0	0	0	0	1	0	0	landrace	0.999979	1.06e-05	1e-05	0.94015	0.05982	1e-05	1e-05	1e-05	1e-05	0.99993	1e-05	1e-05	1e-05	1e-05	1e-05	1e-05	0	1	0	0	0	0	0	0	0	0	0	0	0	0	0	0
56	JI1910	P. sativum	0	0	0	0	1	0	0	0	0	0	0	1	0	0	landrace	0.999979	1.06e-05	1e-05	0.928914	0.0710553	1e-05	1.03333e-05	1e-05	1e-05	0.99993	1e-05	1e-05	1e-05	1e-05	1e-05	1e-05	0	1	0	0	0	0	0	0	0	0	0	0	0	0	0	0
57	JI1129	P. sativum	0	0	0	0	1	0	0	0	0	0	0	1	0	0	landrace	0.984788	0.0152024	1e-05	0.926434	0.0735347	1.1e-05	1e-05	1e-05	1e-05	0.99993	1e-05	1e-05	1e-05	1e-05	1e-05	1e-05	0	1	0	0	0	0	0	0	0	0	0	0	0	0	0	0
58	JI1911	P. sativum	0	0	0	0	1	0	0	0	0	0	0	1	0	0	landrace	0.999977	1.26e-05	1e-05	0.92442	0.0755497	1e-05	1e-05	1e-05	1e-05	0.99993	1e-05	1e-05	1e-05	1e-05	1e-05	1e-05	0	1	0	0	0	0	0	0	0	0	0	0	0	0	0	0
59	JI1834	P. sativum	0	0	0	0	1	0	0	0	0	0	0	1	0	0	landrace	0.933405	0.0665854	1e-05	0.920623	1e-05	0.0793467	1e-05	1e-05	1e-05	0.99993	1e-05	1e-05	1e-05	1e-05	1e-05	1e-05	0	1	0	0	0	0	0	0	0	0	0	0	0	0	0	0
60	JI2153	P. sativum	0	0	0	0	1	0	0	0	0	1	0	0	0	0	other wild	0.940372	0.0596184	1e-05	0.919002	1e-05	0.0809677	1e-05	1e-05	1e-05	0.99993	1e-05	1e-05	1e-05	1e-05	1e-05	1e-05	0	1	0	0	0	0	0	0	0	0	0	0	0	0	0	0
61	JI1933	P. sativum	0	0	0	0	1	0	0	0	0	0	0	1	0	0	landrace	0.99998	1.04e-05	1e-05	0.918345	0.0816247	1e-05	1e-05	1.03333e-05	1e-05	0.99993	1e-05	1e-05	1e-05	1e-05	1e-05	1e-05	0	1	0	0	0	0	0	0	0	0	0	0	0	0	0	0
62	JI2154	P. sativum	0	0	0	0	1	0	0	0	0	1	0	0	0	0	other wild	0.957709	0.0422806	1e-05	0.914596	0.03436	0.0510227	1.13333e-05	1e-05	1e-05	0.99993	1e-05	1e-05	1e-05	1e-05	1e-05	1e-05	0	1	0	0	0	0	0	0	0	0	0	0	0	0	0	0
63	JI0216	P. sativum	0	0	0	0	1	0	0	0	0	0	0	0	1	0	cultivar	0.999979	1.08e-05	1e-05	0.897262	0.102708	1e-05	1e-05	1e-05	1e-05	0.99993	1e-05	1e-05	1e-05	1e-05	1e-05	1e-05	0	1	0	0	0	0	0	0	0	0	0	0	0	0	0	0
64	JI0893	P. sativum	0	0	0	0	1	0	0	0	0	0	0	0	1	0	cultivar	0.99998	1e-05	1e-05	0.89012	0.109846	1.13333e-05	1.26667e-05	1e-05	1e-05	0.99993	1e-05	1e-05	1e-05	1e-05	1e-05	1e-05	0	1	0	0	0	0	0	0	0	0	0	0	0	0	0	0
65	JI0892	P. sativum	0	0	0	0	1	0	0	0	0	0	0	0	1	0	cultivar	0.99998	1e-05	1e-05	0.888628	0.111342	1e-05	1.06667e-05	1e-05	1e-05	0.99993	1e-05	1e-05	1e-05	1e-05	1e-05	1e-05	0	1	0	0	0	0	0	0	0	0	0	0	0	0	0	0
66	JI2156	P. sativum	0	0	0	0	1	0	0	0	0	1	0	0	0	0	other wild	0.936897	0.0630934	1e-05	0.921915	1e-05	0.0780553	1e-05	1e-05	1e-05	0.999928	1e-05	1.2e-05	1e-05	1e-05	1e-05	1e-05	0	1	0	0	0	0	0	0	0	0	0	0	0	0	0	0
67	JI1492	P. sativum	0	0	0	0	1	0	0	0	0	0	0	1	0	0	landrace	0.99998	1e-05	1e-05	0.900769	0.0991993	1e-05	1.23333e-05	1e-05	1.6e-05	0.999924	1e-05	1e-05	1e-05	1e-05	1e-05	1e-05	0	1	0	0	0	0	0	0	0	0	0	0	0	0	0	0
68	JI1679	P. sativum	0	0	0	0	1	0	0	0	0	0	0	1	0	0	landrace	0.999979	1.12e-05	1e-05	0.923203	0.076767	1e-05	1e-05	1.03333e-05	1.9e-05	0.999921	1e-05	1e-05	1e-05	1e-05	1e-05	1e-05	0	1	0	0	0	0	0	0	0	0	0	0	0	0	0	0
69	JI2134	P. sativum	0	0	0	0	1	0	0	0	0	1	0	0	0	0	other wild	0.95247	0.0475204	1e-05	0.902672	0.0364213	0.060887	1e-05	1e-05	1e-05	0.999272	1.1e-05	0.000667	1e-05	1e-05	1e-05	1e-05	0	1	0	0	0	0	0	0	0	0	0	0	0	0	0	0
70	JI2149	P. sativum	0	0	0	0	1	0	0	0	0	0	0	0	0	1	other	0.92936	0.0706304	1e-05	0.897938	0.008136	0.0939063	1e-05	1e-05	1e-05	0.994673	1e-05	0.005267	1e-05	1e-05	1e-05	1e-05	0	1	0	0	0	0	0	0	0	0	0	0	0	0	0	0
71	JI2150	P. sativum	0	0	0	0	1	0	0	0	0	1	0	0	0	0	other wild	0.935004	0.064986	1e-05	0.893563	0.0173217	0.089095	1.1e-05	1e-05	1e-05	0.989752	0.010188	1e-05	1e-05	1e-05	1e-05	1e-05	0	1	0	0	0	0	0	0	0	0	0	0	0	0	0	0
72	JI2129	P. sativum	0	0	0	0	1	0	0	0	0	1	0	0	0	0	other wild	0.931073	0.0689168	1e-05	0.900803	1e-05	0.0991667	1e-05	1e-05	1e-05	0.984628	1e-05	1e-05	1e-05	1e-05	1e-05	0.015312	0	1	0	0	0	0	0	0	0	0	0	0	0	0	0	0
73	JI1625	P. sativum	0	0	0	0	1	0	0	0	0	0	0	1	0	0	landrace	0.99998	1.02e-05	1e-05	0.963139	0.0368303	1e-05	1.03333e-05	1e-05	1.1e-05	0.980563	1e-05	1e-05	0.019376	1e-05	1e-05	1e-05	0	1	0	0	0	0	0	0	0	0	0	0	0	0	0	0
74	JI0180	P. sativum	0	0	0	0	1	0	0	0	0	0	0	1	0	0	landrace	0.999979	1.08e-05	1e-05	0.859214	0.140756	1e-05	1e-05	1e-05	0.023771	0.976169	1e-05	1e-05	1e-05	1e-05	1e-05	1e-05	0	1	0	0	0	0	0	0	0	0	0	0	0	0	0	0
75	JI1968	P. sativum	0	0	0	0	1	0	0	0	0	0	0	1	0	0	landrace	0.99998	1e-05	1e-05	0.892322	0.107645	1e-05	1e-05	1.33333e-05	0.017073	0.968642	1e-05	1e-05	0.014234	1e-05	1e-05	1e-05	0	1	0	0	0	0	0	0	0	0	0	0	0	0	0	0
76	JI2649	P. sativum transcaucasicum	0	0	0	0	0	0	1	0	0	0	0	1	0	0	landrace	0.991077	0.0089132	1e-05	0.944254	0.0557157	1e-05	1e-05	1e-05	1e-05	0.967934	0.032006	1e-05	1e-05	1e-05	1e-05	1e-05	0	1	0	0	0	0	0	0	0	0	0	0	0	0	0	0
77	JI2647	P. sativum transcaucasicum	0	0	0	0	0	0	1	0	0	0	0	1	0	0	landrace	0.991329	0.0086614	1e-05	0.946246	0.0537237	1e-05	1e-05	1e-05	1e-05	0.967858	0.032082	1e-05	1e-05	1e-05	1e-05	1e-05	0	1	0	0	0	0	0	0	0	0	0	0	0	0	0	0
78	JI2157	P. sativum	0	0	0	0	1	0	0	0	0	1	0	0	0	0	other wild	0.943638	0.056352	1e-05	0.911818	0.0103967	0.0777633	1.2e-05	1e-05	1e-05	0.966567	0.030325	0.003058	1e-05	1e-05	1e-05	1e-05	0	1	0	0	0	0	0	0	0	0	0	0	0	0	0	0
79	JI1652	P. sativum	0	0	0	0	1	0	0	0	0	0	0	1	0	0	landrace	0.99998	1.02e-05	1e-05	0.925428	0.0745417	1e-05	1e-05	1e-05	0.027417	0.962191	1e-05	1e-05	0.010341	1e-05	1e-05	1e-05	0	1	0	0	0	0	0	0	0	0	0	0	0	0	0	0
80	JI0177	P. sativum	0	0	0	0	1	0	0	0	0	0	0	1	0	0	landrace	0.99998	1e-05	1e-05	0.924804	0.0751663	1e-05	1e-05	1e-05	1e-05	0.951537	1e-05	1e-05	0.048403	1e-05	1e-05	1e-05	0	1	0	0	0	0	0	0	0	0	0	0	0	0	0	0
81	JI0275	P. sativum	0	0	0	0	1	0	0	0	0	0	0	1	0	0	landrace	0.999977	1.28e-05	1e-05	0.942605	0.0573647	1e-05	1e-05	1e-05	1e-05	0.942121	1e-05	0.057819	1e-05	1e-05	1e-05	1e-05	0	1	0	0	0	0	0	0	0	0	0	0	0	0	0	0
82	JI2583	P. sativum	0	0	0	0	1	0	0	0	0	1	0	0	0	0	other wild	0.999979	1.08e-05	1e-05	0.981038	0.0189307	1.1e-05	1e-05	1e-05	1e-05	0.935811	1e-05	0.064129	1e-05	1e-05	1e-05	1e-05	0	1	0	0	0	0	0	0	0	0	0	0	0	0	0	0
83	JI1082	P. sativum	0	0	0	0	1	0	0	0	0	0	0	1	0	0	landrace	0.957396	0.0425944	1e-05	0.857998	0.0941303	0.0478513	1e-05	1e-05	1e-05	0.9326	0.06734	1e-05	1e-05	1e-05	1e-05	1e-05	0	1	0	0	0	0	0	0	0	0	0	0	0	0	0	0
84	JI1058	P. sativum	0	0	0	0	1	0	0	0	0	0	0	0	1	0	cultivar	0.962378	0.0376122	1e-05	0.939446	0.0184033	0.042128	1e-05	1.23333e-05	1e-05	0.922009	0.077931	1e-05	1e-05	1e-05	1e-05	1e-05	0	1	0	0	0	0	0	0	0	0	0	0	0	0	0	0
85	JI2648	P. sativum transcaucasicum	0	0	0	0	0	0	1	0	0	0	0	1	0	0	landrace	0.971689	0.0283012	1e-05	0.777292	0.183656	0.039032	1e-05	1e-05	0.081967	0.916244	1.7e-05	1e-05	0.001731	1e-05	1e-05	1e-05	0	1	0	0	0	0	0	0	0	0	0	0	0	0	0	0
86	JI0067	P. sativum	0	0	0	0	1	0	0	0	0	0	0	0	1	0	cultivar	0.99998	1.02e-05	1e-05	0.790168	0.209802	1e-05	1e-05	1e-05	0.087475	0.912465	1e-05	1e-05	1e-05	1e-05	1e-05	1e-05	0	1	0	0	0	0	0	0	0	0	0	0	0	0	0	0
87	JI1132	P. sativum	0	0	0	0	1	0	0	0	0	0	0	1	0	0	landrace	0.99998	1e-05	1e-05	0.992023	0.00794733	1e-05	1e-05	1e-05	1e-05	0.911722	1e-05	0.088218	1e-05	1e-05	1e-05	1e-05	0	1	0	0	0	0	0	0	0	0	0	0	0	0	0	0
88	JI0887	P. sativum	0	0	0	0	1	0	0	0	0	0	0	0	1	0	cultivar	0.987852	0.0121378	1e-05	0.91784	0.0821293	1e-05	1e-05	1.1e-05	0.010768	0.905501	0.083681	1e-05	1e-05	1e-05	1e-05	1e-05	0	1	0	0	0	0	0	0	0	0	0	0	0	0	0	0
89	JI1085	P. sativum	0	0	0	0	1	0	0	0	0	0	0	1	0	0	landrace	0.932677	0.0610346	0.0062884	0.847375	0.059685	0.09292	1e-05	1e-05	1e-05	0.904799	0.059042	1e-05	1e-05	1e-05	1e-05	0.03611	0	1	0	0	0	0	0	0	0	0	0	0	0	0	0	0
90	JI1538	P. sativum	0	0	0	0	1	0	0	0	0	0	0	1	0	0	landrace	0.999979	1.14e-05	1e-05	0.91587	0.0840993	1e-05	1.03333e-05	1e-05	0.01893	0.899173	1e-05	0.081847	1e-05	1e-05	1e-05	1e-05	0	1	0	0	0	0	0	0	0	0	0	0	0	0	0	0
91	JI0069	P. sativum	0	0	0	0	1	0	0	0	0	0	0	0	1	0	cultivar	0.99998	1.04e-05	1e-05	0.8264	0.17357	1e-05	1e-05	1e-05	0.102219	0.897721	1e-05	1e-05	1e-05	1e-05	1e-05	1e-05	0	1	0	0	0	0	0	0	0	0	0	0	0	0	0	0
92	JI0028	P. sativum	0	0	0	0	1	0	0	0	0	0	0	1	0	0	landrace	0.960826	0.0391644	1e-05	0.899731	0.0557907	0.0444587	1e-05	1e-05	1e-05	0.87826	0.042537	0.070061	1e-05	1e-05	1e-05	0.009102	0	1	0	0	0	0	0	0	0	0	0	0	0	0	0	0
93	JI0288	P. sativum	0	0	0	0	1	0	0	0	0	0	0	1	0	0	landrace	0.964369	0.0356214	1e-05	0.94313	0.017043	0.0398033	1e-05	1.3e-05	1e-05	0.875961	0.123979	1e-05	1e-05	1e-05	1e-05	1e-05	0	1	0	0	0	0	0	0	0	0	0	0	0	0	0	0
94	JI1084	P. sativum	0	0	0	0	1	0	0	0	0	0	0	1	0	0	landrace	0.951736	0.0482544	1e-05	0.880499	0.0635533	0.055928	1e-05	1e-05	0.001715	0.874633	0.081204	0.003333	0.018665	1e-05	1e-05	0.02043	0	1	0	0	0	0	0	0	0	0	0	0	0	0	0	0
95	JI0228	P. sativum	0	0	0	0	1	0	0	0	0	0	0	1	0	0	landrace	0.96268	0.0373102	1e-05	0.942327	0.0160553	0.0415967	1e-05	1.1e-05	1e-05	0.874357	0.125583	1e-05	1e-05	1e-05	1e-05	1e-05	0	1	0	0	0	0	0	0	0	0	0	0	0	0	0	0
96	JI0233	P. sativum	0	0	0	0	1	0	0	0	0	0	0	0	1	0	cultivar	0.949171	0.0508192	1e-05	0.760928	0.169094	0.069958	1e-05	1e-05	0.063682	0.870659	0.04972	1e-05	0.015242	1e-05	1e-05	0.000667	0	1	0	0	0	0	0	0	0	0	0	0	0	0	0	0
97	JI1071	P. sativum	0	0	0	0	1	0	0	0	0	0	0	0	1	0	cultivar	0.99998	1e-05	1e-05	0.960181	0.0397893	1e-05	1e-05	1e-05	1e-05	0.863438	1e-05	0.136502	1e-05	1e-05	1e-05	1e-05	0	1	0	0	0	0	0	0	0	0	0	0	0	0	0	0
98	JI3186	P. sativum	0	0	0	0	1	0	0	0	0	0	0	1	0	0	landrace	0.917934	0.0808932	0.001173	0.788005	0.0883497	0.123626	1e-05	1e-05	1.7e-05	0.863261	0.102802	1e-05	1e-05	1e-05	1e-05	0.03388	0	1	0	0	0	0	0	0	0	0	0	0	0	0	0	0
99	JI1894	P. sativum	0	0	0	0	1	0	0	0	0	0	0	1	0	0	landrace	0.951809	0.0481806	1e-05	0.870989	0.0755493	0.053442	1e-05	1e-05	0.043517	0.861163	0.009729	1e-05	0.051118	1e-05	1e-05	0.034443	0	1	0	0	0	0	0	0	0	0	0	0	0	0	0	0
100	JI0074	P. sativum	0	0	0	0	1	0	0	0	0	0	0	0	0	1	other	0.99998	1.04e-05	1e-05	0.735365	0.264605	1e-05	1e-05	1e-05	0.161002	0.838938	1e-05	1e-05	1e-05	1e-05	1e-05	1e-05	0	1	0	0	0	0	0	0	0	0	0	0	0	0	0	0
101	JI0863	P. sativum	0	0	0	0	1	0	0	0	0	0	0	0	1	0	cultivar	0.989863	0.0101274	1e-05	0.866461	0.133509	1e-05	1e-05	1e-05	0.060174	0.831237	0.108539	1e-05	1e-05	1e-05	1e-05	1e-05	0	1	0	0	0	0	0	0	0	0	0	0	0	0	0	0
102	JI3178	P. sativum	0	0	0	0	1	0	0	0	0	0	0	1	0	0	landrace	0.948146	0.0518444	1e-05	0.836113	0.0924797	0.0713863	1e-05	1.06667e-05	0.006687	0.8245	0.168763	1e-05	1e-05	1e-05	1e-05	1e-05	0	1	0	0	0	0	0	0	0	0	0	0	0	0	0	0
103	JI3119	P. sativum	0	0	0	0	1	0	0	0	0	0	0	0	1	0	cultivar	0.99998	1.02e-05	1e-05	0.690645	0.309325	1e-05	1e-05	1e-05	0.165005	0.809666	1e-05	0.025279	1e-05	1e-05	1e-05	1e-05	0	1	0	0	0	0	0	0	0	0	0	0	0	0	0	0
104	JI1792	P. sativum	0	0	0	0	1	0	0	0	0	0	0	1	0	0	landrace	0.99062	0.0093704	1e-05	0.832024	0.167946	1e-05	1e-05	1e-05	0.105101	0.803912	0.082535	0.008301	0.000121	1e-05	1e-05	1e-05	0	1	0	0	0	0	0	0	0	0	0	0	0	0	0	0
105	JI3179	P. sativum	0	0	0	0	1	0	0	0	0	0	0	1	0	0	landrace	0.942688	0.0573024	1e-05	0.822629	0.0960877	0.0812607	1e-05	1.23333e-05	0.006362	0.798226	0.195362	1e-05	1e-05	1e-05	1e-05	1e-05	0	1	0	0	0	0	0	0	0	0	0	0	0	0	0	0
106	JI2126	P. sativum	0	0	0	0	1	0	0	0	0	1	0	0	0	0	other wild	0.941766	0.0582242	1e-05	0.81929	0.102822	0.0778673	1.03333e-05	1e-05	0.023584	0.795739	0.150274	1e-05	0.023356	1e-05	1e-05	0.007017	0	1	0	0	0	0	0	0	0	0	0	0	0	0	0	0
107	JI2152	P. sativum	0	0	0	0	1	0	0	0	0	1	0	0	0	0	other wild	0.899259	0.100172	0.000569	0.806199	0.0394177	0.154364	1e-05	1e-05	1e-05	0.795073	0.115137	0.032011	1e-05	1e-05	1e-05	0.057739	0	1	0	0	0	0	0	0	0	0	0	0	0	0	0	0
108	JI0077	P. sativum	0	0	0	0	1	0	0	0	0	0	0	0	0	1	other	0.99998	1.02e-05	1e-05	0.671363	0.328607	1e-05	1e-05	1.06667e-05	0.209584	0.790356	1e-05	1e-05	1e-05	1e-05	1e-05	1e-05	0	1	0	0	0	0	0	0	0	0	0	0	0	0	0	0
109	JI1919	P. sativum	0	0	0	0	1	0	0	0	0	0	0	1	0	0	landrace	0.964495	0.0354952	1e-05	0.99996	1e-05	1e-05	1e-05	1e-05	1e-05	0.788918	1e-05	1e-05	0.211022	1e-05	1e-05	1e-05	0	1	0	0	0	0	0	0	0	0	0	0	0	0	0	0
110	JI2644	P. sativum	0	0	0	0	1	0	0	0	0	0	0	1	0	0	landrace	0.966738	0.0332522	1e-05	0.709297	0.240829	0.0498547	1e-05	1e-05	0.164369	0.784693	0.049745	0.001153	1e-05	1e-05	1e-05	1e-05	0	1	0	0	0	0	0	0	0	0	0	0	0	0	0	0
111	JI0240	P. sativum	0	0	0	0	1	0	0	0	0	0	0	1	0	0	landrace	0.96649	0.0335002	1e-05	0.999957	1e-05	1.1e-05	1.03333e-05	1.13333e-05	1e-05	0.772786	1e-05	1e-05	0.227154	1e-05	1e-05	1e-05	0	1	0	0	0	0	0	0	0	0	0	0	0	0	0	0
112	JI1173	P. sativum	0	0	0	0	1	0	0	0	0	0	0	0	1	0	cultivar	0.931182	0.0688082	1e-05	0.8314	0.0668557	0.101721	1.26667e-05	1e-05	1e-05	0.75476	0.131539	0.092546	1e-05	1e-05	1e-05	0.021115	0	1	0	0	0	0	0	0	0	0	0	0	0	0	0	0
113	JI2353	P. sativum	0	0	0	0	1	0	0	0	0	0	0	1	0	0	landrace	0.774687	0.225303	1e-05	0.657723	0.139839	1e-05	0.202418	1e-05	0.044954	0.752471	1e-05	1e-05	1e-05	0.202525	1e-05	1e-05	0	1	0	0	0	0	0	0	0	0	0	0	0	0	0	0
114	JI1486	P. sativum	0	0	0	0	1	0	0	0	0	0	0	1	0	0	landrace	0.896914	0.103076	1e-05	0.861182	0.0713383	0.00967067	0.057799	1e-05	1.7e-05	0.74711	0.198793	1e-05	1e-05	0.054041	1e-05	1e-05	0	1	0	0	0	0	0	0	0	0	0	0	0	0	0	0
115	JI0344	P. sativum	0	0	0	0	1	0	0	0	0	0	0	0	1	0	cultivar	0.99998	1e-05	1e-05	0.742804	0.257166	1e-05	1e-05	1e-05	0.180757	0.744569	0.056042	0.018592	1e-05	1e-05	1e-05	1e-05	0	1	0	0	0	0	0	0	0	0	0	0	0	0	0	0
116	JI1344	P. sativum	0	0	0	0	1	0	0	0	0	0	0	1	0	0	landrace	0.940511	0.0594794	1e-05	0.851373	0.116696	0.00867567	0.023245	1e-05	0.025726	0.744091	0.205277	1e-05	0.004515	0.020361	1e-05	1e-05	0	1	0	0	0	0	0	0	0	0	0	0	0	0	0	0
117	JI0066	P. sativum	0	0	0	0	1	0	0	0	0	0	0	0	1	0	cultivar	0.999979	1.08e-05	1e-05	0.782126	0.217844	1e-05	1e-05	1e-05	0.142072	0.739588	1e-05	0.11829	1e-05	1e-05	1e-05	1e-05	0	1	0	0	0	0	0	0	0	0	0	0	0	0	0	0
118	JI0174	P. sativum	0	0	0	0	1	0	0	0	0	0	0	1	0	0	landrace	0.956846	0.0431442	1e-05	0.99996	1e-05	1e-05	1.03333e-05	1e-05	1e-05	0.739022	1e-05	1e-05	0.260918	1e-05	1e-05	1e-05	0	1	0	0	0	0	0	0	0	0	0	0	0	0	0	0
119	JI0701	P. sativum	0	0	0	0	1	0	0	0	0	0	0	1	0	0	landrace	0.999977	1.26e-05	1e-05	0.720294	0.279676	1e-05	1e-05	1e-05	0.160445	0.737778	1e-05	0.101728	1e-05	1e-05	1e-05	1e-05	0	1	0	0	0	0	0	0	0	0	0	0	0	0	0	0
120	JI0705	P. sativum	0	0	0	0	1	0	0	0	0	0	0	1	0	0	landrace	0.710211	0.289779	1e-05	0.662485	0.0866043	1e-05	0.250891	1e-05	1e-05	0.73512	0.024491	1e-05	1e-05	0.240339	1e-05	1e-05	0	1	0	0	0	0	0	0	0	0	0	0	0	0	0	0
121	JI1981	P. sativum	0	0	0	0	1	0	0	0	0	0	0	1	0	0	landrace	0.992062	0.0079284	1e-05	0.807715	0.192253	1.16667e-05	1e-05	1e-05	0.136492	0.733905	1.4e-05	1e-05	0.129548	1e-05	1e-05	1e-05	0	1	0	0	0	0	0	0	0	0	0	0	0	0	0	0
122	JI2301	P. sativum	0	0	0	0	1	0	0	0	0	0	0	0	1	0	cultivar	0.992865	0.0071248	1e-05	0.786068	0.213902	1e-05	1e-05	1e-05	0.136792	0.731807	0.106386	1e-05	0.024973	1e-05	1e-05	1.2e-05	0	1	0	0	0	0	0	0	0	0	0	0	0	0	0	0
123	JI1078	P. sativum	0	0	0	0	1	0	0	0	0	0	0	1	0	0	landrace	0.865159	0.126043	0.0087978	0.664371	0.12717	0.208439	1e-05	1e-05	0.044163	0.731748	0.09298	1e-05	1e-05	1e-05	1e-05	0.131069	0	1	0	0	0	0	0	0	0	0	0	0	0	0	0	0
124	JI1548	P. sativum	0	0	0	0	1	0	0	0	0	0	0	1	0	0	landrace	0.754675	0.245315	1e-05	0.729499	0.0524297	1e-05	0.218052	1e-05	1e-05	0.723051	1e-05	1e-05	0.075214	0.201685	1e-05	1e-05	0	1	0	0	0	0	0	0	0	0	0	0	0	0	0	0
125	JI2312	P. sativum	0	0	0	0	1	0	0	0	0	0	0	0	0	1	other	0.930459	0.0695306	1e-05	0.99996	1e-05	1e-05	1e-05	1e-05	1e-05	0.722945	1e-05	1e-05	0.276995	1e-05	1e-05	1e-05	0	1	0	0	0	0	0	0	0	0	0	0	0	0	0	0
126	JI1477	P. sativum	0	0	0	0	1	0	0	0	0	0	0	1	0	0	landrace	0.686639	0.313351	1e-05	0.669507	0.0387087	1e-05	0.291765	1e-05	1e-05	0.721783	1e-05	1e-05	1e-05	0.278157	1e-05	1e-05	0	1	0	0	0	0	0	0	0	0	0	0	0	0	0	0
127	JI2311	P. sativum	0	0	0	0	1	0	0	0	0	0	0	0	0	1	other	0.929017	0.0709726	1e-05	0.99996	1e-05	1e-05	1e-05	1e-05	1e-05	0.721189	1e-05	1e-05	0.278751	1e-05	1e-05	1e-05	0	1	0	0	0	0	0	0	0	0	0	0	0	0	0	0
128	JI0364	P. sativum	0	0	0	0	1	0	0	0	0	0	0	0	1	0	cultivar	0.961514	0.0384762	1e-05	0.711425	0.230739	0.0578153	1.1e-05	1e-05	0.141279	0.713466	0.12984	0.007976	1e-05	1e-05	1e-05	0.00741	0	1	0	0	0	0	0	0	0	0	0	0	0	0	0	0
129	JI1059	P. sativum	0	0	0	0	1	0	0	0	0	0	0	0	1	0	cultivar	0.929222	0.0707676	1e-05	0.769352	0.124901	0.105726	1e-05	1.03333e-05	0.02692	0.7078	0.22247	0.01733	1e-05	1e-05	1e-05	0.02545	0	1	0	0	0	0	0	0	0	0	0	0	0	0	0	0
130	JI2104	P. sativum	0	0	0	0	1	0	0	0	0	0	0	1	0	0	landrace	0.965084	0.0349064	1e-05	0.99996	1e-05	1e-05	1e-05	1e-05	1e-05	0.694158	1e-05	1e-05	0.305782	1e-05	1e-05	1e-05	0	1	0	0	0	0	0	0	0	0	0	0	0	0	0	0
131	JI1503	P. sativum	0	0	0	0	1	0	0	0	0	0	0	1	0	0	landrace	0.829744	0.170246	1e-05	0.781599	0.080707	1e-05	0.137674	1e-05	0.0308	0.692408	1e-05	0.098424	0.038339	0.139999	1e-05	1e-05	0	1	0	0	0	0	0	0	0	0	0	0	0	0	0	0
132	JI2300	P. sativum	0	0	0	0	1	0	0	0	0	0	0	0	1	0	cultivar	0.996938	0.0030516	1e-05	0.736719	0.263251	1e-05	1e-05	1e-05	0.14453	0.69144	0.16398	1e-05	1e-05	1e-05	1e-05	1e-05	0	1	0	0	0	0	0	0	0	0	0	0	0	0	0	0
133	JI0368	P. sativum	0	0	0	0	1	0	0	0	0	0	0	0	1	0	cultivar	0.932392	0.0675976	1e-05	0.771285	0.129231	0.0994633	1e-05	1.06667e-05	0.048864	0.684664	0.081516	0.138695	1e-05	1e-05	1e-05	0.04623	0	1	0	0	0	0	0	0	0	0	0	0	0	0	0	0
134	JI1528	P. sativum	0	0	0	0	1	0	0	0	0	0	0	1	0	0	landrace	0.814006	0.185984	1e-05	0.744488	0.115674	1e-05	0.139819	1e-05	0.032077	0.672786	0.111052	1e-05	0.055747	0.128309	1e-05	1e-05	0	1	0	0	0	0	0	0	0	0	0	0	0	0	0	0
135	JI3120	P. sativum	0	0	0	0	1	0	0	0	0	0	0	0	1	0	cultivar	0.981468	0.0185222	1e-05	0.765212	0.215893	0.0188713	1e-05	1.3e-05	0.161392	0.671705	0.078182	0.072693	0.015997	1.1e-05	1e-05	1e-05	0	1	0	0	0	0	0	0	0	0	0	0	0	0	0	0
136	JI1971	P. sativum	0	0	0	0	1	0	0	0	0	0	0	1	0	0	landrace	0.944536	0.0554542	1e-05	0.995943	1e-05	1e-05	0.004027	1e-05	1e-05	0.670064	1e-05	1e-05	0.329876	1e-05	1e-05	1e-05	0	1	0	0	0	0	0	0	0	0	0	0	0	0	0	0
137	JI0151	P. sativum	0	0	0	0	1	0	0	0	0	0	0	0	0	1	other	0.99998	1e-05	1e-05	0.595748	0.404222	1e-05	1e-05	1e-05	0.311324	0.663393	1e-05	0.025233	1e-05	1e-05	1e-05	1e-05	0	1	0	0	0	0	0	0	0	0	0	0	0	0	0	0
138	JI0172	P. sativum	0	0	0	0	1	0	0	0	0	0	0	1	0	0	landrace	0.945664	0.0543262	1e-05	0.99996	1e-05	1e-05	1e-05	1e-05	1e-05	0.652936	1e-05	1e-05	0.347004	1e-05	1e-05	1e-05	0	1	0	0	0	0	0	0	0	0	0	0	0	0	0	0
139	JI1962	P. sativum	0	0	0	0	1	0	0	0	0	0	0	1	0	0	landrace	0.965854	0.0341362	1e-05	0.999958	1e-05	1.2e-05	1e-05	1e-05	1e-05	0.644775	1e-05	1e-05	0.355164	1e-05	1e-05	1e-05	0	1	0	0	0	0	0	0	0	0	0	0	0	0	0	0
140	JI0148	P. sativum	0	0	0	0	1	0	0	0	0	0	0	0	0	1	other	0.997876	0.0021138	1e-05	0.784428	0.215542	1e-05	1e-05	1e-05	0.149731	0.635377	0.123005	1e-05	0.091847	1e-05	1e-05	1e-05	0	1	0	0	0	0	0	0	0	0	0	0	0	0	0	0
141	JI1669	P. sativum	0	0	0	0	1	0	0	0	0	0	0	1	0	0	landrace	0.949779	0.0502112	1e-05	0.99996	1e-05	1e-05	1e-05	1e-05	1.2e-05	0.627932	1e-05	1e-05	0.372006	1e-05	1e-05	1e-05	0	1	0	0	0	0	0	0	0	0	0	0	0	0	0	0
142	JI1885	P. sativum	0	0	0	0	1	0	0	0	0	0	0	1	0	0	landrace	0.950047	0.0499428	1e-05	0.999959	1e-05	1e-05	1.1e-05	1e-05	1.3e-05	0.62542	1e-05	1e-05	0.374517	1e-05	1e-05	1e-05	0	1	0	0	0	0	0	0	0	0	0	0	0	0	0	0
143	JI2349	P. sativum	0	0	0	0	1	0	0	0	0	0	0	1	0	0	landrace	0.712858	0.287132	1e-05	0.531001	0.199047	1e-05	0.269932	1e-05	0.113094	0.619845	1e-05	1e-05	1e-05	0.267011	1e-05	1e-05	0	1	0	0	0	0	0	0	0	0	0	0	0	0	0	0
144	JI1395	P. sativum	0	0	0	0	1	0	0	0	0	0	0	0	0	1	other	0.969544	0.0304462	1e-05	0.736221	0.224366	0.0393923	1e-05	1e-05	0.155413	0.594697	0.166208	0.083642	1e-05	1e-05	1e-05	1e-05	0	1	0	0	0	0	0	0	0	0	0	0	0	0	0	0
145	JI0162	P. sativum	0	0	0	0	1	0	0	0	0	0	0	1	0	0	landrace	0.954697	0.0452934	1e-05	0.928587	0.04816	0.0232317	1.06667e-05	1e-05	0.023008	0.590345	0.10019	0.068054	0.218372	1e-05	1e-05	1e-05	0	1	0	0	0	0	0	0	0	0	0	0	0	0	0	0
146	JI0026	P. sativum	0	0	0	0	1	0	0	0	0	0	0	0	0	1	other	0.999979	1.06e-05	1e-05	0.89684	0.10313	1e-05	1e-05	1e-05	0.049812	0.571811	1e-05	0.378327	1e-05	1e-05	1e-05	1e-05	0	1	0	0	0	0	0	0	0	0	0	0	0	0	0	0
147	JI0019	P. sativum	0	0	0	0	1	0	0	0	0	0	0	0	0	1	other	0.99998	1.04e-05	1e-05	0.895407	0.104563	1e-05	1e-05	1e-05	0.051596	0.571664	1e-05	0.37669	1e-05	1e-05	1e-05	1e-05	0	1	0	0	0	0	0	0	0	0	0	0	0	0	0	0
148	JI2160	P. sativum	0	0	0	0	1	0	0	0	0	0	0	0	0	1	other	0.99998	1.02e-05	1e-05	0.88714	0.11283	1e-05	1e-05	1e-05	0.059546	0.568087	1e-05	0.372317	1e-05	1e-05	1e-05	1e-05	0	1	0	0	0	0	0	0	0	0	0	0	0	0	0	0
149	JI1724	P. sativum	0	0	0	0	1	0	0	0	0	0	0	0	1	0	cultivar	0.860257	0.139733	1e-05	0.654995	0.223283	1e-05	0.121702	1e-05	0.182389	0.556888	0.062829	0.012232	0.072552	0.113088	1e-05	1.1e-05	0	1	0	0	0	0	0	0	0	0	0	0	0	0	0	0
150	JI1995	P. sativum	0	0	0	0	1	0	0	0	0	0	0	1	0	0	landrace	0.937606	0.0623836	1e-05	0.99996	1e-05	1e-05	1e-05	1e-05	1e-05	0.550647	1e-05	1e-05	0.449293	1e-05	1e-05	1e-05	0	1	0	0	0	0	0	0	0	0	0	0	0	0	0	0
151	JI1626	P. sativum	0	0	0	0	1	0	0	0	0	0	0	1	0	0	landrace	0.946557	0.0534332	1e-05	0.965509	0.025272	1e-05	0.009198	1.03333e-05	0.045379	0.545753	1e-05	0.07211	0.336717	1.1e-05	1e-05	1e-05	0	1	0	0	0	0	0	0	0	0	0	0	0	0	0	0
152	JI0371	P. sativum	0	0	0	0	1	0	0	0	0	0	0	0	1	0	cultivar	0.897175	0.102815	1e-05	0.76129	0.0803297	0.15836	1.03333e-05	1e-05	1.1e-05	0.540017	0.362716	0.062082	1e-05	1.2e-05	1e-05	0.035141	0	1	0	0	0	0	0	0	0	0	0	0	0	0	0	0
153	JI1825	P. sativum	0	0	0	0	1	0	0	0	0	0	0	1	0	0	landrace	0.878618	0.115533	0.0058498	0.693255	0.112337	0.194389	1e-05	1e-05	0.029401	0.534741	0.316633	0.030408	1e-05	1e-05	1e-05	0.088787	0	1	0	0	0	0	0	0	0	0	0	0	0	0	0	0
154	JI0466	P. sativum	0	0	0	0	1	0	0	0	0	0	0	0	1	0	cultivar	0.99998	1e-05	1e-05	0.717836	0.282134	1e-05	1e-05	1e-05	0.232498	0.518014	0.130357	0.119091	1e-05	1e-05	1e-05	1e-05	0	1	0	0	0	0	0	0	0	0	0	0	0	0	0	0
155	JI0616	P. sativum	0	0	0	0	1	0	0	0	0	0	0	0	1	0	cultivar	0.949704	0.0502856	1e-05	0.768776	0.163311	0.0678923	1e-05	1e-05	0.098489	0.513417	0.341635	1e-05	0.046419	1e-05	1e-05	1e-05	0	1	0	0	0	0	0	0	0	0	0	0	0	0	0	0
156	JI2089	P. sativum	0	0	0	0	1	0	0	0	0	0	0	0	0	1	other	0.895964	0.104026	1e-05	0.65007	0.194353	0.155557	1e-05	1e-05	0.140656	0.511517	0.106137	0.122192	0.01356	1e-05	1e-05	0.105917	0	1	0	0	0	0	0	0	0	0	0	0	0	0	0	0
157	JI0558	P. sativum	0	0	0	0	1	0	0	0	0	0	0	0	1	0	cultivar	0.99998	1.02e-05	1e-05	0.511709	0.488261	1e-05	1e-05	1e-05	0.420637	0.508732	1e-05	0.070582	1e-05	1e-05	1e-05	1e-05	0	1	0	0	0	0	0	0	0	0	0	0	0	0	0	0
158	JI0635	P. sativum	0	0	0	0	1	0	0	0	0	0	0	0	1	0	cultivar	0.906074	0.093916	1e-05	0.684171	0.167427	0.14838	1e-05	1.13333e-05	0.078644	0.500901	0.230554	0.121149	1e-05	1e-05	1e-05	0.068722	0	1	0	0	0	0	0	0	0	0	0	0	0	0	0	0
159	JI1547	P. sativum	0	0	0	0	1	0	0	0	0	0	0	1	0	0	landrace	0.66423	0.33576	1e-05	0.613835	0.0558693	0.0867277	0.243558	1e-05	1e-05	0.500428	0.224641	0.023753	1e-05	0.251139	1e-05	1e-05	0	1	0	0	0	0	0	0	0	0	0	0	0	0	0	0
160
161
162
163	JI2764	P. sativum	0	0	0	0	1	0	0	0	0	0	0	0	0	1	other	0.973519	0.026471	1e-05	0.99996	1e-05	1e-05	1e-05	1e-05	1e-05	1e-05	0.99993	1e-05	1e-05	1e-05	1e-05	1e-05	0	0	1	0	0	0	0	0	0	0	0	0	0	0	0	0
164	JI0138	P. sativum	0	0	0	0	1	0	0	0	0	0	0	0	0	1	other	0.970685	0.0293048	1e-05	0.99996	1e-05	1e-05	1e-05	1e-05	1e-05	1e-05	0.99993	1e-05	1e-05	1e-05	1e-05	1e-05	0	0	1	0	0	0	0	0	0	0	0	0	0	0	0	0
165	JI0391	P. sativum	0	0	0	0	1	0	0	0	0	0	0	0	1	0	cultivar	0.969709	0.0302808	1e-05	0.99996	1e-05	1.03333e-05	1e-05	1e-05	1e-05	1e-05	0.99993	1e-05	1e-05	1e-05	1e-05	1e-05	0	0	1	0	0	0	0	0	0	0	0	0	0	0	0	0
166	JI2331	P. sativum	0	0	0	0	1	0	0	0	0	0	0	0	0	1	other	0.970874	0.0291156	1e-05	0.999959	1e-05	1.03333e-05	1e-05	1.1e-05	1e-05	1e-05	0.99993	1e-05	1e-05	1e-05	1e-05	1e-05	0	0	1	0	0	0	0	0	0	0	0	0	0	0	0	0
167	JI0378	P. sativum	0	0	0	0	1	0	0	0	0	0	0	0	1	0	cultivar	0.88953	0.11046	1e-05	0.805721	1e-05	0.194247	1e-05	1.23333e-05	1e-05	1e-05	0.99993	1e-05	1e-05	1e-05	1e-05	1e-05	0	0	1	0	0	0	0	0	0	0	0	0	0	0	0	0
168	JI0734	P. sativum	0	0	0	0	1	0	0	0	0	0	0	0	0	1	other	0.888376	0.111614	1e-05	0.804498	1e-05	0.195472	1e-05	1e-05	1e-05	1e-05	0.99993	1e-05	1e-05	1e-05	1e-05	1e-05	0	0	1	0	0	0	0	0	0	0	0	0	0	0	0	0
169	JI0712	P. sativum	0	0	0	0	1	0	0	0	0	0	0	0	1	0	cultivar	0.88347	0.11652	1e-05	0.796871	1e-05	0.203099	1e-05	1e-05	1e-05	1e-05	0.99993	1e-05	1e-05	1e-05	1e-05	1e-05	0	0	1	0	0	0	0	0	0	0	0	0	0	0	0	0
170	JI0787	P. sativum	0	0	0	0	1	0	0	0	0	0	0	0	1	0	cultivar	0.874132	0.125858	1e-05	0.790983	1e-05	0.208987	1e-05	1e-05	1e-05	1e-05	0.99993	1e-05	1e-05	1e-05	1e-05	1e-05	0	0	1	0	0	0	0	0	0	0	0	0	0	0	0	0
171	JI1002	P. sativum	0	0	0	0	1	0	0	0	0	0	0	0	0	1	other	0.902981	0.0970094	1e-05	0.785815	0.0426333	0.171531	1e-05	1e-05	1e-05	1e-05	0.99993	1e-05	1e-05	1e-05	1e-05	1e-05	0	0	1	0	0	0	0	0	0	0	0	0	0	0	0	0
172	JI3167	P. sativum	0	0	0	0	1	0	0	0	0	0	0	0	1	0	cultivar	0.896473	0.103517	1e-05	0.780999	0.039321	0.179659	1.1e-05	1e-05	1e-05	1e-05	0.99993	1e-05	1e-05	1e-05	1e-05	1e-05	0	0	1	0	0	0	0	0	0	0	0	0	0	0	0	0
173	JI0118	P. sativum	0	0	0	0	1	0	0	0	0	0	0	0	0	1	other	0.839273	0.160717	1e-05	0.641672	0.067994	0.290314	1e-05	1e-05	1e-05	1e-05	0.99993	1e-05	1e-05	1e-05	1e-05	1e-05	0	0	1	0	0	0	0	0	0	0	0	0	0	0	0	0
174	JI0040	P. sativum	0	0	0	0	1	0	0	0	0	0	0	0	0	1	other	0.837336	0.162654	1e-05	0.640618	0.0663173	0.293045	1e-05	1e-05	1e-05	1e-05	0.99993	1e-05	1e-05	1e-05	1e-05	1e-05	0	0	1	0	0	0	0	0	0	0	0	0	0	0	0	0
175	JI2695	P. elatius	0	1	0	0	0	0	0	0	1	0	0	0	0	0	P. elatius	0.812035	0.187955	1e-05	0.606489	0.074938	0.318553	1e-05	1e-05	1e-05	1e-05	0.99993	1e-05	1e-05	1e-05	1e-05	1e-05	0	0	1	0	0	0	0	0	0	0	0	0	0	0	0	0
176	JI1851	P. sativum	0	0	0	0	1	0	0	0	0	0	0	0	0	1	other	0.806876	0.193114	1e-05	0.603554	0.0711013	0.325324	1e-05	1e-05	1e-05	1e-05	0.99993	1e-05	1e-05	1e-05	1e-05	1e-05	0	0	1	0	0	0	0	0	0	0	0	0	0	0	0	0
177	JI0932	P. sativum	0	0	0	0	1	0	0	0	0	0	0	0	1	0	cultivar	0.966723	0.0332672	1e-05	0.999957	1e-05	1.26667e-05	1e-05	1e-05	1e-05	1e-05	0.999929	1e-05	1e-05	1e-05	1.1e-05	1e-05	0	0	1	0	0	0	0	0	0	0	0	0	0	0	0	0
178	JI2753	P. sativum	0	0	0	0	1	0	0	0	0	0	0	0	0	1	other	0.975924	0.024066	1e-05	0.999957	1e-05	1.33333e-05	1e-05	1e-05	1e-05	1e-05	0.999929	1e-05	1e-05	1.1e-05	1e-05	1e-05	0	0	1	0	0	0	0	0	0	0	0	0	0	0	0	0
179	JI3030	P. sativum	0	0	0	0	1	0	0	0	0	0	0	0	1	0	cultivar	0.847442	0.152548	1e-05	0.734531	0.003868	0.261581	1e-05	1e-05	1e-05	1e-05	0.999922	1e-05	1e-05	1e-05	1e-05	1.8e-05	0	0	1	0	0	0	0	0	0	0	0	0	0	0	0	0
180	JI0699	P. sativum	0	0	0	0	1	0	0	0	0	0	0	0	1	0	cultivar	0.794584	0.205406	1e-05	0.587811	0.068681	0.343487	1e-05	1e-05	1e-05	0.012847	0.987084	1e-05	1e-05	1e-05	1e-05	1.9e-05	0	0	1	0	0	0	0	0	0	0	0	0	0	0	0	0
181	JI0735	P. sativum	0	0	0	0	1	0	0	0	0	0	0	0	0	1	other	0.907175	0.0928148	1e-05	0.716791	0.126207	0.156982	1e-05	1e-05	0.05247	1e-05	0.94747	1e-05	1e-05	1e-05	1e-05	1e-05	0	0	1	0	0	0	0	0	0	0	0	0	0	0	0	0
182	JI0200	P. sativum	0	0	0	0	1	0	0	0	0	1	0	0	0	0	other wild	0.805005	0.191433	0.003562	0.654359	0.0170203	0.328601	1e-05	1e-05	1e-05	0.061565	0.897862	1e-05	1e-05	1e-05	1e-05	0.040524	0	0	1	0	0	0	0	0	0	0	0	0	0	0	0	0
183	JI0024	P. sativum	0	0	0	0	1	0	0	0	0	0	0	0	0	1	other	0.809349	0.190641	1e-05	0.600688	0.0973883	0.301903	1e-05	1e-05	0.017177	0.007863	0.895512	0.079409	1e-05	1e-05	1e-05	1e-05	0	0	1	0	0	0	0	0	0	0	0	0	0	0	0	0
184	JI1307	P. sativum	0	0	0	0	1	0	0	0	0	0	0	0	1	0	cultivar	0.855275	0.14116	0.003565	0.704841	0.0438103	0.251328	1e-05	1e-05	1e-05	1e-05	0.884419	0.115521	1e-05	1e-05	1e-05	1e-05	0	0	1	0	0	0	0	0	0	0	0	0	0	0	0	0
185	JI0116	P. sativum	0	0	0	0	1	0	0	0	0	0	0	0	1	0	cultivar	0.940351	0.0596392	1e-05	0.842072	0.066646	0.0912613	1.06667e-05	1.03333e-05	0.047281	1e-05	0.859815	1e-05	0.092855	1e-05	1e-05	1e-05	0	0	1	0	0	0	0	0	0	0	0	0	0	0	0	0
186	JI1345	P. sativum	0	0	0	0	1	0	0	0	0	0	0	1	0	0	landrace	0.853318	0.146672	1e-05	0.700064	0.0508687	0.249046	1.13333e-05	1e-05	1e-05	0.15354	0.8464	1e-05	1e-05	1e-05	1e-05	1e-05	0	0	1	0	0	0	0	0	0	0	0	0	0	0	0	0
187	JI0205	P. sativum	0	0	0	0	1	0	0	0	0	0	0	1	0	0	landrace	0.743186	0.248783	0.008031	0.553574	0.033393	0.413013	1e-05	1e-05	1e-05	0.084589	0.78787	0.004993	1e-05	1e-05	1e-05	0.122509	0	0	1	0	0	0	0	0	0	0	0	0	0	0	0	0
188	JI0703	P. sativum	0	0	0	0	1	0	0	0	0	0	0	0	1	0	cultivar	0.870228	0.129762	1e-05	0.800477	1e-05	0.199493	1e-05	1e-05	1e-05	1e-05	0.776181	0.223759	1e-05	1e-05	1e-05	1e-05	0	0	1	0	0	0	0	0	0	0	0	0	0	0	0	0
189	JI0133	P. sativum	0	0	0	0	1	0	0	0	0	0	0	0	1	0	cultivar	0.91873	0.0812604	1e-05	0.807355	0.100844	0.0917807	1e-05	1e-05	0.084532	1e-05	0.766025	0.149394	1e-05	1e-05	1e-05	1e-05	0	0	1	0	0	0	0	0	0	0	0	0	0	0	0	0
190	JI2243	P. sativum	0	0	0	0	1	0	0	0	0	0	0	0	0	1	other	0.958485	0.0415052	1e-05	0.848265	0.083095	0.0686193	1e-05	1e-05	0.101196	0.149344	0.74941	1e-05	1e-05	1e-05	1e-05	1e-05	0	0	1	0	0	0	0	0	0	0	0	0	0	0	0	0
191	JI0246	P. sativum	0	0	0	0	1	0	0	0	0	0	0	1	0	0	landrace	0.805424	0.184053	0.010524	0.600481	0.0661373	0.333362	1e-05	1e-05	1e-05	0.132728	0.735848	0.015188	1e-05	1e-05	1e-05	0.116196	0	0	1	0	0	0	0	0	0	0	0	0	0	0	0	0
192	JI0794	P. sativum	0	0	0	0	1	0	0	0	0	0	0	0	0	1	other	0.927466	0.0725238	1e-05	0.883715	0.0302077	0.0860563	1e-05	1.03333e-05	0.005327	0.224221	0.734319	0.036093	1e-05	1e-05	1e-05	1e-05	0	0	1	0	0	0	0	0	0	0	0	0	0	0	0	0
193	JI2061	P. sativum	0	0	0	0	1	0	0	0	0	0	0	0	0	1	other	0.816883	0.172447	0.01067	0.638536	0.0504377	0.311007	1e-05	1e-05	1e-05	0.178388	0.73024	0.005438	0.002662	1e-05	1e-05	0.083241	0	0	1	0	0	0	0	0	0	0	0	0	0	0	0	0
194	JI0071	P. sativum	0	0	0	0	1	0	0	0	0	0	0	0	1	0	cultivar	0.712939	0.268406	0.018654	0.51241	0.00165567	0.485914	1e-05	1e-05	1e-05	0.083106	0.695094	1.2e-05	1e-05	0.005854	1e-05	0.215903	0	0	1	0	0	0	0	0	0	0	0	0	0	0	0	0
195	JI2332	P. sativum	0	0	0	0	1	0	0	0	0	0	0	0	0	1	other	0.920106	0.079884	1e-05	0.605018	0.245365	0.149597	1e-05	1e-05	0.209107	0.095501	0.690703	1e-05	0.00465	1e-05	1e-05	1e-05	0	0	1	0	0	0	0	0	0	0	0	0	0	0	0	0
196	JI0125	P. sativum	0	0	0	0	1	0	0	0	0	0	0	0	0	1	other	0.921176	0.078814	1e-05	0.604243	0.247837	0.147899	1e-05	1e-05	0.212047	0.095124	0.687978	1e-05	0.004811	1e-05	1e-05	1e-05	0	0	1	0	0	0	0	0	0	0	0	0	0	0	0	0
197	JI1793	P. sativum	0	0	0	0	1	0	0	0	0	0	0	0	0	1	other	0.909652	0.0903382	1e-05	0.686234	0.157433	0.156312	1e-05	1e-05	0.10325	0.166793	0.67183	0.058088	1e-05	1e-05	1e-05	1e-05	0	0	1	0	0	0	0	0	0	0	0	0	0	0	0	0
198	JI2761	P. sativum	0	0	0	0	1	0	0	0	0	0	0	0	1	0	cultivar	0.97026	0.0297298	1e-05	0.558834	0.356192	0.0849543	1e-05	1e-05	0.357982	1e-05	0.641958	1e-05	1e-05	1e-05	1e-05	1e-05	0	0	1	0	0	0	0	0	0	0	0	0	0	0	0	0
199	JI0044	P. sativum	0	0	0	0	1	0	0	0	0	0	0	0	0	1	other	0.949233	0.0507566	1e-05	0.894418	0.0545327	0.051029	1e-05	1e-05	0.040103	1e-05	0.640281	0.319566	1e-05	1e-05	1e-05	1e-05	0	0	1	0	0	0	0	0	0	0	0	0	0	0	0	0
200	JI1055	P. sativum	0	0	0	0	1	0	0	0	0	0	0	0	1	0	cultivar	0.925688	0.0743024	1e-05	0.806844	0.072501	0.120635	1e-05	1e-05	0.00478	0.347024	0.628052	1e-05	0.020105	1e-05	1e-05	1e-05	0	0	1	0	0	0	0	0	0	0	0	0	0	0	0	0
201	JI2058	P. sativum	0	0	0	0	1	0	0	0	0	0	0	0	0	1	other	0.963342	0.0366484	1e-05	0.667708	0.256565	0.075707	1e-05	1e-05	0.222327	0.16575	0.611874	1e-05	1e-05	1e-05	1e-05	1e-05	0	0	1	0	0	0	0	0	0	0	0	0	0	0	0	0
202	JI1222	P. sativum	0	0	0	0	1	0	0	0	0	0	0	0	0	1	other	0.959072	0.040918	1e-05	0.735653	0.197365	0.066961	1e-05	1e-05	0.172633	0.219077	0.607864	1e-05	0.000386	1e-05	1e-05	1e-05	0	0	1	0	0	0	0	0	0	0	0	0	0	0	0	0
203	JI0692	P. sativum	0	0	0	0	1	0	0	0	0	0	0	0	1	0	cultivar	0.760998	0.225004	0.0139988	0.567679	0.0347987	0.397502	1e-05	1e-05	1e-05	0.141824	0.60187	0.078198	1e-05	1e-05	1e-05	0.178069	0	0	1	0	0	0	0	0	0	0	0	0	0	0	0	0
204	JI1718	P. sativum	0	0	0	0	1	0	0	0	0	0	0	0	1	0	cultivar	0.998028	0.0019624	1e-05	0.610251	0.373906	0.0158237	1e-05	1e-05	0.318156	0.065309	0.564215	0.05228	1e-05	1e-05	1e-05	1e-05	0	0	1	0	0	0	0	0	0	0	0	0	0	0	0	0
205	JI0380	P. sativum	0	0	0	0	1	0	0	0	0	0	0	0	1	0	cultivar	0.951705	0.0482852	1e-05	0.666885	0.246788	0.086305	1e-05	1.16667e-05	0.212362	0.200785	0.557304	0.029509	1e-05	1e-05	1e-05	1e-05	0	0	1	0	0	0	0	0	0	0	0	0	0	0	0	0
206	JI0806	P. sativum	0	0	0	0	1	0	0	0	0	0	0	0	0	1	other	0.943472	0.0565176	1e-05	0.744316	0.149524	0.106139	1e-05	1e-05	0.118729	0.061636	0.550966	0.268629	1e-05	1e-05	1e-05	1e-05	0	0	1	0	0	0	0	0	0	0	0	0	0	0	0	0
207	JI1870	P. sativum	0	0	0	0	1	0	0	0	0	0	0	0	0	1	other	0.936356	0.0636338	1e-05	0.600471	0.275442	0.124066	1e-05	1e-05	0.230276	0.05972	0.540084	0.16988	1e-05	1e-05	1e-05	1e-05	0	0	1	0	0	0	0	0	0	0	0	0	0	0	0	0
208	JI2223	P. sativum	0	0	0	0	1	0	0	0	0	0	0	0	1	0	cultivar	0.971209	0.0287814	1e-05	0.628301	0.311126	0.0605533	1e-05	1.03333e-05	0.25425	0.224946	0.520754	1e-05	1e-05	1e-05	1e-05	1e-05	0	0	1	0	0	0	0	0	0	0	0	0	0	0	0	0
209	JI1704	P. sativum ssp jomardii	0	0	0	0	0	1	0	0	0	1	0	0	0	0	other wild	0.777894	0.222096	1e-05	0.514117	0.10857	0.377293	1e-05	1e-05	4.8e-05	0.209021	0.520568	0.10317	1e-05	1e-05	1e-05	0.167163	0	0	1	0	0	0	0	0	0	0	0	0	0	0	0	0
210	JI0055	P. sativum	0	0	0	0	1	0	0	0	0	0	0	0	0	1	other	0.835269	0.164721	1e-05	0.721266	0.130281	0.0515363	0.0969063	1e-05	0.087797	1e-05	0.516273	0.354432	1e-05	0.041458	1e-05	1e-05	0	0	1	0	0	0	0	0	0	0	0	0	0	0	0	0
211	JI2394	P. sativum	0	0	0	0	1	0	0	0	0	0	0	0	0	1	other	0.978645	0.0213452	1e-05	0.604037	0.386207	1e-05	0.009736	1e-05	0.427672	1e-05	0.516057	1e-05	0.056221	1e-05	1e-05	1e-05	0	0	1	0	0	0	0	0	0	0	0	0	0	0	0	0
212
213
214
215	JI1041	P. sativum	0	0	0	0	1	0	0	0	0	0	0	0	1	0	cultivar	0.98856	0.0114296	1e-05	0.926409	0.0735613	1e-05	1e-05	1e-05	0.03185	0.45647	1e-05	0.499774	0.011867	1e-05	1e-05	1e-05	0	0	0	0	0	1	0	0	0	0	0	0	0	0	0	0
216	JI0718	P. sativum	0	0	0	0	1	0	0	0	0	0	0	0	1	0	cultivar	0.81122	0.18877	1e-05	0.661176	0.170668	1e-05	0.168136	1e-05	0.138212	0.270631	1e-05	0.42394	1e-05	0.167178	1e-05	1e-05	0	0	0	0	0	1	0	0	0	0	0	0	0	0	0	0
217	JI0012	P. sativum	0	0	0	0	1	0	0	0	0	0	0	0	0	1	other	0.999979	1.06e-05	1e-05	0.621024	0.378944	1.06667e-05	1.06667e-05	1e-05	0.365776	0.225181	1e-05	0.408993	1e-05	1e-05	1e-05	1e-05	0	0	0	0	0	1	0	0	0	0	0	0	0	0	0	0
218	JI0214	P. sativum	0	0	0	0	1	0	0	0	0	0	0	1	0	0	landrace	0.613468	0.386522	1e-05	0.653947	0.00049	1e-05	0.345544	1e-05	1e-05	0.014767	1.1e-05	0.444435	0.237067	0.30369	1e-05	1e-05	0	0	0	0	0	1	0	0	0	0	0	0	0	0	0	0
219	JI0815	P. sativum	0	0	0	0	1	0	0	0	0	0	0	0	0	1	other	0.999979	1.08e-05	1e-05	0.63849	0.36148	1.03333e-05	1e-05	1e-05	0.312226	0.438546	1e-05	0.249178	1e-05	1e-05	1e-05	1e-05	0	0	0	0	0	1	0	0	0	0	0	0	0	0	0	0
220	JI0467	P. sativum	0	0	0	0	1	0	0	0	0	0	0	0	1	0	cultivar	0.905105	0.0948852	1e-05	0.687632	0.234184	1e-05	0.0781643	1e-05	0.21538	0.45121	1e-05	0.100017	0.164942	0.068421	1e-05	1e-05	0	0	0	0	0	1	0	0	0	0	0	0	0	0	0	0
221	JI1737	P. sativum	0	0	0	0	1	0	0	0	0	0	0	0	0	1	other	0.962766	0.0372242	1e-05	0.650878	0.339762	1e-05	0.00934	1e-05	0.399112	0.11564	1e-05	0.057237	0.42797	1e-05	1e-05	1e-05	0	0	0	0	0	1	0	0	0	0	0	0	0	0	0	0
222	JI1639	P. sativum	0	0	0	0	1	0	0	0	0	0	0	1	0	0	landrace	0.930923	0.0690666	1e-05	0.992	1e-05	1e-05	0.00797	1e-05	0.007829	0.475683	1e-05	0.043733	0.472715	1e-05	1e-05	1e-05	0	0	0	0	0	1	0	0	0	0	0	0	0	0	0	0
223	JI2074	P. elatius	0	1	0	0	0	0	0	0	1	0	0	0	0	0	P. elatius	0.63775	0.0827636	0.279486	0.701983	1e-05	1.06667e-05	0.0193873	0.278609	1.3e-05	0.397359	1e-05	0.015045	0.308225	1e-05	0.279327	1e-05	0	0	0	0	0	1	0	0	0	0	0	0	0	0	0	0
224	JI1707	P. sativum	0	0	0	0	1	0	0	0	0	0	0	0	0	1	other	0.970576	0.0294142	1e-05	0.674859	0.285258	0.0398633	1e-05	1e-05	0.201909	0.32417	0.05682	0.417054	1e-05	1e-05	1e-05	1.7e-05	0	0	0	0	0	1	0	0	0	0	0	0	0	0	0	0
225	JI2693	P. sativum	0	0	0	0	1	0	0	0	0	0	0	0	0	1	other	0.99998	1.04e-05	1e-05	0.629702	0.370268	1e-05	1e-05	1e-05	0.332828	0.406493	0.032363	0.228275	1e-05	1e-05	1e-05	1e-05	0	0	0	0	0	1	0	0	0	0	0	0	0	0	0	0
226	JI0152	P. sativum	0	0	0	0	1	0	0	0	0	0	0	0	0	1	other	0.99998	1e-05	1e-05	0.693118	0.306852	1e-05	1e-05	1e-05	0.311744	0.267304	0.058994	0.360323	0.001605	1e-05	1e-05	1e-05	0	0	0	0	0	1	0	0	0	0	0	0	0	0	0	0
227	JI0909	P. sativum	0	0	0	0	1	0	0	0	0	0	0	0	0	1	other	0.999979	1.06e-05	1e-05	0.536688	0.463281	1.06667e-05	1.03333e-05	1e-05	0.455407	0.096854	0.06467	0.383028	1e-05	1e-05	1e-05	1e-05	0	0	0	0	0	1	0	0	0	0	0	0	0	0	0	0
228	JI2177	P. sativum	0	0	0	0	1	0	0	0	0	0	0	0	0	1	other	0.684929	0.315061	1e-05	0.675797	0.0477027	1e-05	0.27648	1e-05	1e-05	0.415295	0.059072	0.29975	1e-05	0.225843	1e-05	1e-05	0	0	0	0	0	1	0	0	0	0	0	0	0	0	0	0
229	JI0062	P. sativum	0	0	0	0	1	0	0	0	0	0	0	0	0	1	other	0.999979	1.06e-05	1e-05	0.818337	0.181633	1e-05	1e-05	1e-05	0.137511	0.380893	0.085445	0.396111	1e-05	1e-05	1e-05	1e-05	0	0	0	0	0	1	0	0	0	0	0	0	0	0	0	0
230	JI2366	P. sativum	0	0	0	0	1	0	0	0	0	0	0	0	1	0	cultivar	0.99998	1e-05	1e-05	0.701334	0.298636	1e-05	1e-05	1e-05	0.231478	0.449793	0.063703	0.254986	1e-05	1e-05	1e-05	1e-05	0	0	0	0	0	1	0	0	0	0	0	0	0	0	0	0
231	JI2273	P. sativum	0	0	0	0	1	0	0	0	0	0	0	0	1	0	cultivar	0.99998	1e-05	1e-05	0.696676	0.303293	1.13333e-05	1e-05	1e-05	0.237482	0.440799	0.068553	0.253126	1e-05	1e-05	1e-05	1e-05	0	0	0	0	0	1	0	0	0	0	0	0	0	0	0	0
232	JI0149	P. sativum	0	0	0	0	1	0	0	0	0	0	0	0	0	1	other	0.945864	0.0541264	1e-05	0.601591	0.35639	0.00261833	0.039391	1e-05	0.340429	0.242724	0.089988	0.289774	1e-05	0.037055	1e-05	1e-05	0	0	0	0	0	1	0	0	0	0	0	0	0	0	0	0
233	JI0971	P. sativum	0	0	0	0	1	0	0	0	0	0	0	0	1	0	cultivar	0.99998	1e-05	1e-05	0.665004	0.334966	1e-05	1e-05	1e-05	0.283584	0.485389	0.061977	0.169009	1e-05	1.1e-05	1e-05	1e-05	0	0	0	0	0	1	0	0	0	0	0	0	0	0	0	0
234	JI1535	P. sativum	0	0	0	0	1	0	0	0	0	0	0	1	0	0	landrace	0.538593	0.461397	1e-05	0.504962	0.064464	1e-05	0.430554	1e-05	0.004063	0.405916	0.047093	0.120398	1e-05	0.422501	1e-05	1e-05	0	0	0	0	0	1	0	0	0	0	0	0	0	0	0	0
235	JI0083	P. sativum	0	0	0	0	1	0	0	0	0	0	0	1	0	0	landrace	0.800823	0.199167	1e-05	0.611377	0.210564	0.0103377	0.167712	1e-05	0.2262	0.045943	0.182248	0.384291	1e-05	0.161287	1e-05	1e-05	0	0	0	0	0	1	0	0	0	0	0	0	0	0	0	0
236	JI0322	P. sativum	0	0	0	0	1	0	0	0	0	0	0	0	1	0	cultivar	0.99998	1e-05	1e-05	0.918241	0.081729	1e-05	1e-05	1e-05	0.014805	0.300958	0.226809	0.457388	1e-05	1e-05	1e-05	1e-05	0	0	0	0	0	1	0	0	0	0	0	0	0	0	0	0
237	JI1227	P. sativum	0	0	0	0	1	0	0	0	0	0	0	0	1	0	cultivar	0.999977	1.32e-05	1e-05	0.556396	0.443574	1e-05	1e-05	1e-05	0.367029	0.12993	0.185801	0.3172	1e-05	1e-05	1e-05	1e-05	0	0	0	0	0	1	0	0	0	0	0	0	0	0	0	0
238	JI0150	P. sativum	0	0	0	0	1	0	0	0	0	0	0	0	0	1	other	0.950976	0.0490136	1e-05	0.857351	0.0624353	0.080193	1e-05	1e-05	0.035144	0.187698	0.301773	0.475345	1e-05	1e-05	1e-05	1e-05	0	0	0	0	0	1	0	0	0	0	0	0	0	0	0	0
239	JI0146	P. sativum	0	0	0	0	1	0	0	0	0	0	0	0	0	1	other	0.962486	0.0375042	1e-05	0.860228	0.104174	0.0355773	1e-05	1e-05	0.040955	0.373649	0.234662	0.350693	1e-05	1e-05	1e-05	1e-05	0	0	0	0	0	1	0	0	0	0	0	0	0	0	0	0
240	JI0050	P. sativum	0	0	0	0	1	0	0	0	0	0	0	0	0	1	other	0.961698	0.0382924	1e-05	0.863249	0.10047	0.0362613	1e-05	1e-05	0.036421	0.374923	0.236547	0.352069	1e-05	1e-05	1e-05	1e-05	0	0	0	0	0	1	0	0	0	0	0	0	0	0	0	0
241	JI1863	P. sativum	0	0	0	0	1	0	0	0	0	0	0	0	0	1	other	0.974051	0.0259386	1e-05	0.771921	0.184207	0.043852	1e-05	1e-05	0.175871	0.083055	0.307951	0.433083	1e-05	1e-05	1e-05	1e-05	0	0	0	0	0	1	0	0	0	0	0	0	0	0	0	0
242	JI0340	P. sativum	0	0	0	0	1	0	0	0	0	0	0	0	1	0	cultivar	0.99998	1.04e-05	1e-05	0.515704	0.484263	1.26667e-05	1e-05	1e-05	0.423778	0.3579	0.101602	0.11668	1e-05	1e-05	1e-05	1e-05	0	0	0	0	0	1	0	0	0	0	0	0	0	0	0	0
243	JI1125	P. sativum	0	0	0	0	1	0	0	0	0	0	0	1	0	0	landrace	0.906019	0.0939712	1e-05	0.517352	0.400094	1.33333e-05	0.0825313	1e-05	0.358027	0.388334	1e-05	1e-05	0.187635	0.065965	1e-05	1e-05	0	0	0	0	0	1	0	0	0	0	0	0	0	0	0	0
244	JI2716	P. sativum	0	0	0	0	1	0	0	0	0	0	0	0	0	1	other	0.797263	0.202727	1e-05	0.690239	0.13049	0.040793	0.138469	1e-05	0.059256	1e-05	0.443636	0.416766	1e-05	0.080302	1e-05	1e-05	0	0	0	0	0	1	0	0	0	0	0	0	0	0	0	0
245	JI0825	P. sativum	0	0	0	0	1	0	0	0	0	0	0	0	0	1	other	0.999979	1.08e-05	1e-05	0.62704	0.37293	1e-05	1e-05	1e-05	0.307676	0.227783	0.25262	0.211879	1e-05	1.2e-05	1e-05	1e-05	0	0	0	0	0	1	0	0	0	0	0	0	0	0	0	0
246	JI0208	P. sativum	0	0	0	0	1	0	0	0	0	0	0	0	0	1	other	0.999979	1.1e-05	1e-05	0.629335	0.370635	1e-05	1e-05	1e-05	0.304701	0.228454	0.254541	0.212263	1e-05	1e-05	1e-05	1e-05	0	0	0	0	0	1	0	0	0	0	0	0	0	0	0	0
247	JI1043	P. sativum	0	0	0	0	1	0	0	0	0	0	0	1	0	0	landrace	0.689267	0.310723	1e-05	0.569026	0.02561	0.309317	0.0960377	1e-05	0.006736	0.079498	0.329087	0.241058	0.056136	0.089851	1e-05	0.197625	0	0	0	0	0	1	0	0	0	0	0	0	0	0	0	0
248	JI0693	P. sativum	0	0	0	0	1	0	0	0	0	0	0	0	1	0	cultivar	0.99998	1.02e-05	1e-05	0.79163	0.20834	1e-05	1e-05	1e-05	0.14081	0.273645	0.339068	0.246437	1e-05	1e-05	1e-05	1e-05	0	0	0	0	0	1	0	0	0	0	0	0	0	0	0	0
249	JI0957	P. sativum	0	0	0	0	1	0	0	0	0	0	0	0	1	0	cultivar	0.99998	1e-05	1e-05	0.554691	0.445279	1e-05	1.03333e-05	1e-05	0.360377	0.389696	0.145364	0.104522	1e-05	1.1e-05	1e-05	1e-05	0	0	0	0	0	1	0	0	0	0	0	0	0	0	0	0
250	JI0123	P. sativum	0	0	0	0	1	0	0	0	0	1	0	0	0	0	other wild	0.618155	0.381835	1e-05	0.597193	0.0479553	0.060996	0.293846	1e-05	1e-05	1e-05	0.460497	0.309945	1e-05	0.229508	1e-05	1e-05	0	0	0	0	0	1	0	0	0	0	0	0	0	0	0	0
251	JI0188	P. sativum	0	0	0	0	1	0	0	0	0	0	0	1	0	0	landrace	0.844498	0.155492	1e-05	0.619505	0.243898	0.02518	0.111407	1e-05	0.21505	0.213491	0.131139	0.062526	0.294576	0.083198	1e-05	1e-05	0	0	0	0	0	1	0	0	0	0	0	0	0	0	0	0
252	JI1735	P. sativum	0	0	0	0	1	0	0	0	0	0	0	0	1	0	cultivar	0.795099	0.204891	1e-05	0.538716	0.237399	0.093397	0.130479	1e-05	0.182637	0.332107	0.231691	0.095192	1e-05	0.132543	1e-05	0.025811	0	0	0	0	0	1	0	0	0	0	0	0	0	0	0	0
253	JI2048	P. sativum	0	0	0	0	1	0	0	0	0	0	0	0	1	0	cultivar	0.905414	0.0905748	0.0040108	0.689079	0.158803	0.152098	1.03333e-05	1e-05	0.059492	0.286697	0.427581	0.17421	0.008419	1e-05	1e-05	0.043579	0	0	0	0	0	1	0	0	0	0	0	0	0	0	0	0
254	JI0820	P. sativum	0	0	0	0	1	0	0	0	0	0	0	0	0	1	other	0.999978	1.16e-05	1e-05	0.649517	0.350453	1e-05	1e-05	1e-05	0.407891	0.03469	0.364081	0.133796	0.059511	1e-05	1e-05	1e-05	0	0	0	0	0	1	0	0	0	0	0	0	0	0	0	0
255	JI0782	P. sativum	0	0	0	0	1	0	0	0	0	0	0	0	1	0	cultivar	0.944251	0.0557392	1e-05	0.688904	0.214634	0.0964427	1e-05	1e-05	0.142812	0.189098	0.488803	0.162729	0.016528	1e-05	1e-05	1e-05	0	0	0	0	0	1	0	0	0	0	0	0	0	0	0	0
256	JI2277	P. sativum	0	0	0	0	1	0	0	0	0	0	0	0	0	1	other	0.782023	0.217967	1e-05	0.580121	0.079082	0.340777	1.06667e-05	1e-05	0.037553	0.336874	0.308463	0.090782	1e-05	1e-05	1e-05	0.226298	0	0	0	0	0	1	0	0	0	0	0	0	0	0	0	0
257	JI1128	P. sativum	0	0	0	0	1	0	0	0	0	0	0	1	0	0	landrace	0.910652	0.0893384	1e-05	0.701346	0.238829	0.00810467	0.0517107	1e-05	0.244493	0.208417	0.106493	0.02762	0.412947	1e-05	1e-05	1e-05	0	0	0	0	0	1	0	0	0	0	0	0	0	0	0	0
258	JI0955	P. sativum	0	0	0	0	1	0	0	0	0	0	0	0	1	0	cultivar	0.991778	0.0082116	1e-05	0.66446	0.322751	0.012769	1e-05	1e-05	0.229877	0.473336	0.264922	0.031825	1e-05	1e-05	1e-05	1e-05	0	0	0	0	0	1	0	0	0	0	0	0	0	0	0	0
259	JI2707	P. sativum	0	0	0	0	1	0	0	0	0	0	0	0	0	1	other	0.979888	0.0201016	1e-05	0.754903	0.227632	0.0174447	1e-05	1e-05	0.263466	0.289144	0.392164	0.046309	0.008888	1e-05	1e-05	1e-05	0	0	0	0	0	1	0	0	0	0	0	0	0	0	0	0
260	JI0270	P. sativum	0	0	0	0	1	0	0	0	0	0	0	1	0	0	landrace	0.746465	0.253525	1e-05	0.637756	0.0368707	0.239287	0.0860767	1e-05	1e-05	0.290997	0.49492	0.046182	1e-05	0.09453	1e-05	0.073341	0	0	0	0	0	1	0	0	0	0	0	0	0	0	0	0
261	JI2081	P. sativum	0	0	0	0	1	0	0	0	0	0	0	0	0	1	other	0.895767	0.104223	1e-05	0.55691	0.310225	0.0920767	0.040779	1e-05	0.261743	0.253899	0.349616	0.023688	0.070036	0.040999	1e-05	1e-05	0	0	0	0	0	1	0	0	0	0	0	0	0	0	0	0
262	JI1837	P. sativum	0	0	0	0	1	0	0	0	0	0	0	1	0	0	landrace	0.801252	0.188751	0.009997	0.637187	0.035777	0.327016	1e-05	1e-05	1e-05	0.384681	0.428113	0.022299	1e-05	1.2e-05	1e-05	0.164865	0	0	0	0	0	1	0	0	0	0	0	0	0	0	0	0
263	JI1636	P. sativum	0	0	0	0	1	0	0	0	0	0	0	1	0	0	landrace	0.932429	0.0675612	1e-05	0.91391	0.0777603	0.00830967	1.1e-05	1e-05	0.094517	0.446497	0.144913	0.007271	0.306763	1.8e-05	1e-05	1e-05	0	0	0	0	0	1	0	0	0	0	0	0	0	0	0	0
264	JI0369	P. sativum	0	0	0	0	1	0	0	0	0	0	0	0	1	0	cultivar	0.996802	0.0031876	1e-05	0.526526	0.453666	0.019786	1e-05	1.16667e-05	0.386723	0.331949	0.277231	0.004056	1e-05	1e-05	1e-05	1e-05	0	0	0	0	0	1	0	0	0	0	0	0	0	0	0	0
265	JI0198	P. elatius	0	1	0	0	0	0	0	0	1	0	0	0	0	0	P. elatius	0.611898	0.0913032	0.296799	0.682655	1e-05	1e-05	0.0209043	0.29642	1e-05	0.345649	0.014642	1e-05	0.343153	1e-05	0.296516	1e-05	0	0	0	0	0	1	0	0	0	0	0	0	0	0	0	0
266	JI1882	P. sativum	0	0	0	0	1	0	0	0	0	0	0	1	0	0	landrace	0.903902	0.0960882	1e-05	0.949305	0.012356	0.021847	0.016482	1e-05	0.00987	0.472528	0.057594	1e-05	0.459968	1e-05	1e-05	1e-05	0	0	0	0	0	1	0	0	0	0	0	0	0	0	0	0
267	JI2561	P. sativum	0	0	0	0	1	0	0	0	0	1	0	0	0	0	other wild	0.750931	0.233237	0.015832	0.604014	0.0686387	0.276845	0.050492	1e-05	0.017	0.472141	0.15741	1e-05	0.102292	0.038283	1e-05	0.212854	0	0	0	0	0	1	0	0	0	0	0	0	0	0	0	0
268	JI0965	P. sativum	0	0	0	0	1	0	0	0	0	0	0	1	0	0	landrace	0.903137	0.0968532	1e-05	0.845615	0.104049	0.0105977	0.039728	1e-05	0.066796	0.426441	0.166503	1e-05	0.34022	1e-05	1e-05	1e-05	0	0	0	0	0	1	0	0	0	0	0	0	0	0	0	0
269	JI1482	P. sativum	0	0	0	0	1	0	0	0	0	0	0	1	0	0	landrace	0.794426	0.205564	1e-05	0.79169	0.064675	1e-05	0.143614	1e-05	0.028947	0.384761	0.191651	1e-05	0.280353	0.114259	1e-05	1e-05	0	0	0	0	0	1	0	0	0	0	0	0	0	0	0	0
270	JI1835	P. sativum	0	0	0	0	1	0	0	0	0	0	0	1	0	0	landrace	0.782018	0.204304	0.013678	0.607254	0.0299837	0.362742	1e-05	1e-05	1e-05	0.49644	0.30281	1e-05	1e-05	1e-05	1e-05	0.200701	0	0	0	0	0	1	0	0	0	0	0	0	0	0	0	0
271	JI1915	P. sativum	0	0	0	0	1	0	0	0	0	0	0	1	0	0	landrace	0.996206	0.0037842	1e-05	0.921521	0.078449	1e-05	1e-05	1e-05	0.090347	0.423082	0.320918	1e-05	0.165612	1e-05	1e-05	1e-05	0	0	0	0	0	1	0	0	0	0	0	0	0	0	0	0
272	JI1524	P. sativum	0	0	0	0	1	0	0	0	0	0	0	1	0	0	landrace	0.708135	0.291855	1e-05	0.639513	0.00741167	0.231555	0.121511	1e-05	1e-05	0.451711	0.325918	1e-05	1e-05	0.125309	1.8e-05	0.097014	0	0	0	0	0	1	0	0	0	0	0	0	0	0	0	0
273	JI0950	P. elatius	0	1	0	0	0	0	0	0	1	0	0	0	0	0	P. elatius	0.957846	0.0421436	1e-05	0.585279	0.347689	0.0670123	1e-05	1e-05	0.249992	0.391024	0.358933	1.1e-05	1e-05	1e-05	1e-05	1e-05	0	0	0	0	0	1	0	0	0	0	0	0	0	0	0	0
274	JI2233	P. sativum	0	0	0	0	1	0	0	0	0	0	0	0	1	0	cultivar	0.99298	0.0070102	1e-05	0.645055	0.336512	0.0184137	1e-05	1e-05	0.310291	0.270566	0.413593	1e-05	0.00551	1e-05	1e-05	1e-05	0	0	0	0	0	1	0	0	0	0	0	0	0	0	0	0
275	JI2279	P. sativum	0	0	0	0	1	0	0	0	0	0	0	0	0	1	other	0.829831	0.170159	1e-05	0.501963	0.212513	0.285505	1e-05	1e-05	0.149349	0.259685	0.420706	1e-05	1e-05	1e-05	1e-05	0.17022	0	0	0	0	0	1	0	0	0	0	0	0	0	0	0	0
276
277
278
279	JI0021	P. sativum	0	0	0	0	1	0	0	0	0	0	0	0	1	0	cultivar	0.999979	1.06e-05	1e-05	0.99996	1e-05	1e-05	1e-05	1e-05	1e-05	1e-05	1e-05	0.99993	1e-05	1e-05	1e-05	1e-05	0	0	0	1	0	0	0	0	0	0	0	0	0	0	0	0
280	JI0124	P. sativum	0	0	0	0	1	0	0	0	0	0	0	0	0	1	other	0.990412	0.0095784	1e-05	0.99996	1e-05	1e-05	1e-05	1e-05	1e-05	1e-05	1e-05	0.99993	1e-05	1e-05	1e-05	1e-05	0	0	0	1	0	0	0	0	0	0	0	0	0	0	0	0
281	JI0020	P. sativum	0	0	0	0	1	0	0	0	0	0	0	0	0	1	other	0.987638	0.012352	1e-05	0.99996	1e-05	1e-05	1e-05	1e-05	1e-05	1e-05	1e-05	0.99993	1e-05	1e-05	1e-05	1e-05	0	0	0	1	0	0	0	0	0	0	0	0	0	0	0	0
282	JI0015	P. sativum	0	0	0	0	1	0	0	0	0	0	0	0	0	1	other	0.878874	0.121116	1e-05	0.921157	1e-05	1e-05	0.0788127	1e-05	1e-05	1e-05	1e-05	0.99993	1e-05	1e-05	1e-05	1e-05	0	0	0	1	0	0	0	0	0	0	0	0	0	0	0	0
283	JI0952	P. sativum	0	0	0	0	1	0	0	0	0	0	0	0	1	0	cultivar	0.999979	1.12e-05	1e-05	0.881671	0.118298	1e-05	1.03333e-05	1e-05	1e-05	1e-05	1e-05	0.99993	1e-05	1e-05	1e-05	1e-05	0	0	0	1	0	0	0	0	0	0	0	0	0	0	0	0
284	JI3086	P. sativum	0	0	0	0	1	0	0	0	0	0	0	0	0	1	other	0.99998	1e-05	1e-05	0.843235	0.156734	1e-05	1.03333e-05	1e-05	1e-05	1e-05	1e-05	0.99993	1e-05	1e-05	1e-05	1e-05	0	0	0	1	0	0	0	0	0	0	0	0	0	0	0	0
285	JI2436	P. sativum	0	0	0	0	1	0	0	0	0	0	0	0	1	0	cultivar	0.99998	1e-05	1e-05	0.732678	0.267291	1e-05	1e-05	1.06667e-05	1e-05	1e-05	1e-05	0.99993	1e-05	1e-05	1e-05	1e-05	0	0	0	1	0	0	0	0	0	0	0	0	0	0	0	0
286	JI0007	P. sativum	0	0	0	0	1	0	0	0	0	0	0	0	0	1	other	0.991352	0.008638	1e-05	0.99996	1e-05	1e-05	1e-05	1e-05	1e-05	1e-05	1e-05	0.999929	1e-05	1e-05	1.1e-05	1e-05	0	0	0	1	0	0	0	0	0	0	0	0	0	0	0	0
287	JI1386	P. sativum	0	0	0	0	1	0	0	0	0	0	0	0	0	1	other	0.999979	1.12e-05	1e-05	0.825946	0.174024	1e-05	1e-05	1e-05	1e-05	1e-05	1e-05	0.999929	1e-05	1.1e-05	1e-05	1e-05	0	0	0	1	0	0	0	0	0	0	0	0	0	0	0	0
288	JI0657	P. sativum	0	0	0	0	1	0	0	0	0	0	0	0	1	0	cultivar	0.999979	1.14e-05	1e-05	0.831689	0.168281	1e-05	1.03333e-05	1e-05	1e-05	1e-05	1e-05	0.999926	1e-05	1e-05	1.4e-05	1e-05	0	0	0	1	0	0	0	0	0	0	0	0	0	0	0	0
289	JI0813	P. sativum	0	0	0	0	1	0	0	0	0	0	0	0	0	1	other	0.99998	1e-05	1e-05	0.728623	0.271347	1e-05	1e-05	1e-05	1e-05	1e-05	1e-05	0.999926	1.4e-05	1e-05	1e-05	1e-05	0	0	0	1	0	0	0	0	0	0	0	0	0	0	0	0
290	JI0717	P. sativum	0	0	0	0	1	0	0	0	0	0	0	0	1	0	cultivar	0.99998	1.04e-05	1e-05	0.834223	0.165747	1e-05	1.03333e-05	1e-05	1e-05	1e-05	1e-05	0.99992	1e-05	1.6e-05	1.4e-05	1e-05	0	0	0	1	0	0	0	0	0	0	0	0	0	0	0	0
291	JI2776	P. sativum	0	0	0	0	1	0	0	0	0	0	0	0	0	1	other	0.947719	0.0522714	1e-05	0.917366	0.0545123	1e-05	0.028102	1e-05	0.040524	1e-05	1e-05	0.959416	1e-05	1e-05	1e-05	1e-05	0	0	0	1	0	0	0	0	0	0	0	0	0	0	0	0
292	JI3639	P. sativum	0	0	0	0	1	0	0	0	0	0	0	0	1	0	cultivar	0.99998	1.04e-05	1e-05	0.559505	0.440465	1e-05	1e-05	1e-05	0.042929	1e-05	1e-05	0.957007	1e-05	1e-05	1.4e-05	1e-05	0	0	0	1	0	0	0	0	0	0	0	0	0	0	0	0
293	JI1722	P. sativum	0	0	0	0	1	0	0	0	0	0	0	0	1	0	cultivar	0.99998	1.02e-05	1e-05	0.94251	0.0574603	1e-05	1e-05	1e-05	0.060435	1e-05	1e-05	0.939505	1e-05	1e-05	1e-05	1e-05	0	0	0	1	0	0	0	0	0	0	0	0	0	0	0	0
294	JI0695	P. sativum	0	0	0	0	1	0	0	0	0	0	0	0	0	1	other	0.99998	1.02e-05	1e-05	0.866614	0.133356	1e-05	1e-05	1e-05	0.102764	1e-05	1e-05	0.897176	1e-05	1e-05	1e-05	1e-05	0	0	0	1	0	0	0	0	0	0	0	0	0	0	0	0
295	JI0974	P. sativum	0	0	0	0	1	0	0	0	0	0	0	0	0	1	other	0.99998	1e-05	1e-05	0.865915	0.134055	1e-05	1e-05	1e-05	0.103867	1e-05	1e-05	0.896073	1e-05	1e-05	1e-05	1e-05	0	0	0	1	0	0	0	0	0	0	0	0	0	0	0	0
296	JI0154	P. sativum	0	0	0	0	1	0	0	0	0	0	0	0	0	1	other	0.99998	1e-05	1e-05	0.590061	0.409909	1e-05	1e-05	1e-05	0.121434	1e-05	1e-05	0.878506	1e-05	1.1e-05	1e-05	1e-05	0	0	0	1	0	0	0	0	0	0	0	0	0	0	0	0
297	JI0058	P. sativum	0	0	0	0	1	0	0	0	0	0	0	0	0	1	other	0.829619	0.170371	1e-05	0.80567	0.0623523	1e-05	0.131958	1e-05	1.2e-05	1e-05	0.065378	0.869931	1e-05	0.064639	1e-05	1e-05	0	0	0	1	0	0	0	0	0	0	0	0	0	0	0	0
298	JI0060	P. sativum	0	0	0	0	1	0	0	0	0	0	0	0	0	1	other	0.999978	1.22e-05	1e-05	0.868273	0.131695	1e-05	1.23333e-05	1e-05	0.118433	1e-05	0.050945	0.830572	1e-05	1e-05	1e-05	1e-05	0	0	0	1	0	0	0	0	0	0	0	0	0	0	0	0
299	JI0800	P. elatius	0	1	0	0	0	0	0	0	1	0	0	0	0	0	P. elatius	0.92895	0.0710404	1e-05	0.926275	1e-05	0.0736953	1e-05	1e-05	1e-05	1e-05	0.181078	0.818862	1e-05	1e-05	1e-05	1e-05	0	0	0	1	0	0	0	0	0	0	0	0	0	0	0	0
300	JI0025	P. sativum	0	0	0	0	1	0	0	0	0	0	0	0	0	1	other	0.999979	1.06e-05	1e-05	0.964759	0.035211	1e-05	1.03333e-05	1e-05	1e-05	0.190278	1e-05	0.809662	1e-05	1e-05	1e-05	1e-05	0	0	0	1	0	0	0	0	0	0	0	0	0	0	0	0
301	JI0014	P. sativum	0	0	0	0	1	0	0	0	0	0	0	0	0	1	other	0.989048	0.010942	1e-05	0.979017	0.0209523	1e-05	1.03333e-05	1e-05	1e-05	0.19119	1e-05	0.80875	1e-05	1e-05	1e-05	1e-05	0	0	0	1	0	0	0	0	0	0	0	0	0	0	0	0
302	JI0022	P. sativum	0	0	0	0	1	0	0	0	0	0	0	0	1	0	cultivar	0.999979	1.06e-05	1e-05	0.918321	0.0816477	1e-05	1.2e-05	1e-05	0.09217	0.113621	1e-05	0.79416	1e-05	1e-05	1e-05	1e-05	0	0	0	1	0	0	0	0	0	0	0	0	0	0	0	0
303	JI1865	P. sativum	0	0	0	0	1	0	0	0	0	0	0	0	0	1	other	0.950546	0.049444	1e-05	0.863311	0.111127	1e-05	0.025542	1e-05	0.124871	0.114017	1e-05	0.761062	1e-05	1e-05	1e-05	1e-05	0	0	0	1	0	0	0	0	0	0	0	0	0	0	0	0
304	JI2262	P. sativum	0	0	0	0	1	0	0	0	0	0	0	0	1	0	cultivar	0.99998	1e-05	1e-05	0.829232	0.170737	1e-05	1.16667e-05	1e-05	0.188035	0.088765	1e-05	0.72315	1e-05	1e-05	1e-05	1e-05	0	0	0	1	0	0	0	0	0	0	0	0	0	0	0	0
305	JI1703	P. elatius	0	1	0	0	0	0	0	0	1	0	0	0	0	0	P. elatius	0.970768	0.0292222	1e-05	0.908813	0.0750243	0.0161433	1e-05	1e-05	0.029918	0.141275	0.118107	0.71066	1e-05	1e-05	1e-05	1e-05	0	0	0	1	0	0	0	0	0	0	0	0	0	0	0	0
306	JI0073	P. sativum	0	0	0	0	1	0	0	0	0	0	0	0	0	1	other	0.821293	0.178697	1e-05	0.687403	0.159629	1e-05	0.152948	1e-05	0.114142	0.06452	0.036673	0.706674	1e-05	0.07796	1e-05	1e-05	0	0	0	1	0	0	0	0	0	0	0	0	0	0	0	0
307	JI0128	P. sativum	0	0	0	0	1	0	0	0	0	0	0	0	0	1	other	0.665429	0.334561	1e-05	0.604341	0.100999	1e-05	0.294641	1e-05	1e-05	1e-05	0.092764	0.698821	1e-05	0.208365	1e-05	1e-05	0	0	0	1	0	0	0	0	0	0	0	0	0	0	0	0
308	JI0046	P. sativum	0	0	0	0	1	0	0	0	0	0	0	0	0	1	other	0.790338	0.209652	1e-05	0.560645	0.249986	1e-05	0.189349	1e-05	0.200391	1e-05	1e-05	0.666932	1e-05	0.132627	1e-05	1e-05	0	0	0	1	0	0	0	0	0	0	0	0	0	0	0	0
309	JI1228	P. sativum	0	0	0	0	1	0	0	0	0	0	0	0	0	1	other	0.999977	1.28e-05	1e-05	0.912616	0.087354	1e-05	1.03333e-05	1e-05	0.07951	0.270541	1e-05	0.649899	1e-05	1e-05	1e-05	1e-05	0	0	0	1	0	0	0	0	0	0	0	0	0	0	0	0
310	JI0018	P. sativum	0	0	0	0	1	0	0	0	0	0	0	0	0	1	other	0.999979	1.08e-05	1e-05	0.953086	0.0468833	1e-05	1.03333e-05	1e-05	0.04451	0.323499	1e-05	0.631941	1e-05	1e-05	1e-05	1e-05	0	0	0	1	0	0	0	0	0	0	0	0	0	0	0	0
311	JI0132	P. sativum	0	0	0	0	1	0	0	0	0	0	0	0	0	1	other	0.836271	0.163719	1e-05	0.800647	0.0776653	1.06667e-05	0.121667	1e-05	0.049709	0.120111	0.123013	0.628158	1e-05	0.078975	1e-05	1.2e-05	0	0	0	1	0	0	0	0	0	0	0	0	0	0	0	0
312	JI2822	P. sativum	0	0	0	0	1	0	0	0	0	0	0	0	0	1	other	0.985079	0.0149106	1e-05	0.650319	0.34965	1e-05	1.03333e-05	1.06667e-05	0.372483	1e-05	1e-05	0.627457	1e-05	1e-05	1e-05	1e-05	0	0	0	1	0	0	0	0	0	0	0	0	0	0	0	0
313	JI3636	P. sativum	0	0	0	0	1	0	0	0	0	0	0	0	0	1	other	0.985618	0.0143724	1e-05	0.649467	0.350502	1.13333e-05	1e-05	1e-05	0.373046	1e-05	1e-05	0.626889	1e-05	1.4e-05	1e-05	1.1e-05	0	0	0	1	0	0	0	0	0	0	0	0	0	0	0	0
314	JI3637	P. sativum	0	0	0	0	1	0	0	0	0	0	0	0	0	1	other	0.985246	0.0147436	1e-05	0.649157	0.350812	1e-05	1e-05	1.1e-05	0.373106	1e-05	1e-05	0.62683	1e-05	1.4e-05	1e-05	1e-05	0	0	0	1	0	0	0	0	0	0	0	0	0	0	0	0
315	JI3604	P. sativum	0	0	0	0	1	0	0	0	0	0	0	0	0	1	other	0.985921	0.0140686	1e-05	0.649477	0.350493	1.03333e-05	1e-05	1e-05	0.373577	1e-05	1e-05	0.626359	1e-05	1.5e-05	1e-05	1e-05	0	0	0	1	0	0	0	0	0	0	0	0	0	0	0	0
316	JI0039	P. sativum	0	0	0	0	1	0	0	0	0	0	0	0	0	1	other	0.585479	0.414511	1e-05	0.629046	1e-05	0.0154447	0.35549	1e-05	1e-05	1e-05	0.061927	0.623995	1e-05	0.314024	1.3e-05	1.1e-05	0	0	0	1	0	0	0	0	0	0	0	0	0	0	0	0
317	JI3635	P. sativum	0	0	0	0	1	0	0	0	0	0	0	0	0	1	other	0.986414	0.0135764	1e-05	0.644573	0.355393	1.13333e-05	1.23333e-05	1e-05	0.376746	1e-05	1e-05	0.623191	1e-05	1.3e-05	1e-05	1e-05	0	0	0	1	0	0	0	0	0	0	0	0	0	0	0	0
318	JI0795	P. sativum	0	0	0	0	1	0	0	0	0	0	0	0	0	1	other	0.970614	0.0293756	1e-05	0.926116	0.0524187	0.0214457	1e-05	1e-05	0.05868	0.058249	0.271025	0.612006	1e-05	1e-05	1e-05	1e-05	0	0	0	1	0	0	0	0	0	0	0	0	0	0	0	0
319	JI0120	P. sativum	0	0	0	0	1	0	0	0	0	0	0	0	1	0	cultivar	0.974539	0.0254512	1e-05	0.849589	0.131429	0.0189617	1e-05	1e-05	0.11475	0.136747	0.15719	0.591273	1e-05	1e-05	1e-05	1e-05	0	0	0	1	0	0	0	0	0	0	0	0	0	0	0	0
320	JI1714	P. sativum	0	0	0	0	1	0	0	0	0	0	0	0	0	1	other	0.99998	1e-05	1e-05	0.577282	0.422688	1e-05	1e-05	1e-05	0.411273	1e-05	1e-05	0.588667	1e-05	1e-05	1e-05	1e-05	0	0	0	1	0	0	0	0	0	0	0	0	0	0	0	0
321	JI1713	P. sativum	0	0	0	0	1	0	0	0	0	0	0	0	1	0	cultivar	0.999979	1.08e-05	1e-05	0.875704	0.124263	1.26667e-05	1e-05	1e-05	0.091765	0.324654	1e-05	0.583531	1e-05	1e-05	1e-05	1e-05	0	0	0	1	0	0	0	0	0	0	0	0	0	0	0	0
322	JI1706	P. sativum	0	0	0	0	1	0	0	0	0	0	0	0	0	1	other	0.975337	0.0246528	1e-05	0.935003	0.0546	0.0103773	1e-05	1e-05	0.023939	0.283983	0.121482	0.556348	0.014218	1e-05	1e-05	1e-05	0	0	0	1	0	0	0	0	0	0	0	0	0	0	0	0
323	JI0048	P. sativum	0	0	0	0	1	0	0	0	0	0	0	0	0	1	other	0.75664	0.24335	1e-05	0.587034	0.205702	1e-05	0.207243	1e-05	0.113322	1e-05	0.200827	0.546873	1e-05	0.138939	1e-05	1e-05	0	0	0	1	0	0	0	0	0	0	0	0	0	0	0	0
324	JI0339	P. sativum	0	0	0	0	1	0	0	0	0	0	0	0	1	0	cultivar	0.996643	0.003347	1e-05	0.885456	0.114514	1e-05	1e-05	1e-05	0.098585	0.356023	1e-05	0.545342	1e-05	1e-05	1e-05	1e-05	0	0	0	1	0	0	0	0	0	0	0	0	0	0	0	0
325	JI3605	P. sativum	0	0	0	0	1	0	0	0	0	0	0	0	1	0	cultivar	0.99998	1e-05	1e-05	0.664147	0.335821	1e-05	1.26667e-05	1e-05	0.339923	0.117536	1e-05	0.54249	1e-05	1e-05	1e-05	1e-05	0	0	0	1	0	0	0	0	0	0	0	0	0	0	0	0
326	JI0131	P. sativum	0	0	0	0	1	0	0	0	0	0	0	0	0	1	other	0.99998	1e-05	1e-05	0.67215	0.32782	1e-05	1e-05	1e-05	0.308811	0.162799	1e-05	0.52834	1e-05	1e-05	1e-05	1e-05	0	0	0	1	0	0	0	0	0	0	0	0	0	0	0	0
327	JI1224	P. sativum	0	0	0	0	1	0	0	0	0	0	0	0	0	1	other	0.974317	0.0256728	1e-05	0.738817	0.217446	0.043717	1e-05	1e-05	0.138142	0.063147	0.278625	0.520046	1e-05	1.1e-05	1e-05	1e-05	0	0	0	1	0	0	0	0	0	0	0	0	0	0	0	0
328	JI0006	P. sativum	0	0	0	0	1	0	0	0	0	0	0	0	0	1	other	0.99998	1.04e-05	1e-05	0.622279	0.377691	1e-05	1e-05	1e-05	0.352584	0.127551	1e-05	0.519814	1e-05	1e-05	1e-05	1e-05	0	0	0	1	0	0	0	0	0	0	0	0	0	0	0	0
329	JI0134	P. sativum	0	0	0	0	1	0	0	0	0	0	0	0	0	1	other	0.999979	1.1e-05	1e-05	0.629608	0.370362	1e-05	1e-05	1e-05	0.364994	0.128119	1e-05	0.506837	1e-05	1e-05	1e-05	1e-05	0	0	0	1	0	0	0	0	0	0	0	0	0	0	0	0
330
331
332
333	JI2683	P. sativum	0	0	0	0	1	0	0	0	0	0	0	0	1	0	cultivar	0.999979	1.06e-05	1e-05	0.464653	0.535314	1.3e-05	1e-05	1e-05	0.441204	0.558736	1e-05	1e-05	1e-05	1e-05	1e-05	1e-05	0	0	0	0	0	0	0	1	0	0	0	0	0	0	0	0
334	JI2100	P. sativum	0	0	0	0	1	0	0	0	0	0	0	0	0	1	other	0.999979	1.06e-05	1e-05	0.487354	0.512616	1e-05	1e-05	1e-05	0.43412	0.533269	1e-05	0.032561	1e-05	1e-05	1e-05	1e-05	0	0	0	0	0	0	0	1	0	0	0	0	0	0	0	0
335	JI0323	P. sativum	0	0	0	0	1	0	0	0	0	0	0	0	1	0	cultivar	0.99998	1e-05	1e-05	0.270152	0.729818	1e-05	1e-05	1e-05	0.489292	1e-05	0.510648	1e-05	1e-05	1e-05	1e-05	1e-05	0	0	0	0	0	0	0	1	0	0	0	0	0	0	0	0
336	JI2193	P. sativum	0	0	0	0	1	0	0	0	0	0	0	0	0	1	other	0.999979	1.1e-05	1e-05	0.339693	0.660277	1e-05	1e-05	1e-05	0.470377	1e-05	0.529554	1e-05	1e-05	1e-05	1e-05	1.9e-05	0	0	0	0	0	0	0	1	0	0	0	0	0	0	0	0
337	JI0424	P. sativum	0	0	0	0	1	0	0	0	0	0	0	0	1	0	cultivar	0.99998	1e-05	1e-05	0.287649	0.712321	1e-05	1e-05	1e-05	0.463407	1e-05	0.536533	1e-05	1e-05	1e-05	1e-05	1e-05	0	0	0	0	0	0	0	1	0	0	0	0	0	0	0	0
338	JI2314	P. sativum	0	0	0	0	1	0	0	0	0	0	0	0	0	1	other	0.999979	1.08e-05	1e-05	0.355825	0.644144	1.16667e-05	1e-05	1e-05	0.441626	1e-05	0.558306	1e-05	1e-05	1.1e-05	1.7e-05	1e-05	0	0	0	0	0	0	0	1	0	0	0	0	0	0	0	0
339	JI1573	P. sativum	0	0	0	0	1	0	0	0	0	0	0	0	0	1	other	0.99998	1e-05	1e-05	0.478733	0.521237	1.03333e-05	1e-05	1e-05	0.371851	1e-05	0.628089	1e-05	1e-05	1e-05	1e-05	1e-05	0	0	0	0	0	0	0	1	0	0	0	0	0	0	0	0
340	JI2623	P. sativum	0	0	0	0	1	0	0	0	0	0	0	0	1	0	cultivar	0.99998	1e-05	1e-05	0.458146	0.541824	1e-05	1e-05	1e-05	0.257651	1e-05	0.106819	0.635472	1.7e-05	1e-05	1.2e-05	1e-05	0	0	0	0	0	0	0	1	0	0	0	0	0	0	0	0
341	JI3611	P. sativum	0	0	0	0	1	0	0	0	0	0	0	0	1	0	cultivar	0.99998	1e-05	1e-05	0.488424	0.511542	1.33333e-05	1e-05	1.1e-05	0.143969	1e-05	0.046169	0.809804	1e-05	1e-05	1.9e-05	1e-05	0	0	0	0	0	0	0	1	0	0	0	0	0	0	0	0
342	JI0409	P. sativum	0	0	0	0	1	0	0	0	0	0	0	0	1	0	cultivar	0.99998	1.04e-05	1e-05	0.451504	0.548466	1e-05	1e-05	1e-05	0.12013	1e-05	1e-05	0.87981	1e-05	1e-05	1e-05	1e-05	0	0	0	0	0	0	0	1	0	0	0	0	0	0	0	0
343	JI1014	P. sativum	0	0	0	0	1	0	0	0	0	0	0	0	1	0	cultivar	0.99998	1e-05	1e-05	0.456983	0.542987	1e-05	1e-05	1e-05	0.117118	1e-05	1e-05	0.882822	1e-05	1e-05	1e-05	1e-05	0	0	0	0	0	0	0	1	0	0	0	0	0	0	0	0
344	JI2329	P. sativum	0	0	0	0	1	0	0	0	0	0	0	0	1	0	cultivar	0.99998	1e-05	1e-05	0.456641	0.543328	1e-05	1e-05	1.03333e-05	0.1166	1e-05	1e-05	0.883339	1.1e-05	1e-05	1e-05	1e-05	0	0	0	0	0	0	0	1	0	0	0	0	0	0	0	0
345	JI0516	P. sativum	0	0	0	0	1	0	0	0	0	0	0	0	1	0	cultivar	0.999979	1.08e-05	1e-05	0.456133	0.543835	1e-05	1.16667e-05	1e-05	0.116243	1e-05	1e-05	0.883695	1e-05	1.1e-05	1e-05	1.1e-05	0	0	0	0	0	0	0	1	0	0	0	0	0	0	0	0
346	JI1407	P. sativum	0	0	0	0	1	0	0	0	0	0	0	0	0	1	other	0.986	0.0139896	1e-05	0.45717	0.527912	0.00839067	0.00651767	1e-05	0.498554	0.145634	0.25617	1e-05	0.099601	1e-05	1e-05	1.1e-05	0	0	0	0	0	0	0	1	0	0	0	0	0	0	0	0
347	Baryton	P. sativum	0	0	0	0	1	0	0	0	0	0	0	0	1	0	cultivar	0.999978	1.2e-05	1e-05	0.374796	0.625171	1.33333e-05	1e-05	1e-05	0.486842	1e-05	0.458236	0.054872	1e-05	1e-05	1e-05	1e-05	0	0	0	0	0	0	0	1	0	0	0	0	0	0	0	0
348	JI2257	P. sativum	0	0	0	0	1	0	0	0	0	0	0	0	1	0	cultivar	0.999978	1.18e-05	1e-05	0.478144	0.514844	0.006992	1e-05	1e-05	0.483986	0.269873	0.246091	1e-05	1e-05	1e-05	1e-05	1e-05	0	0	0	0	0	0	0	1	0	0	0	0	0	0	0	0
349	JI0034	P. sativum	0	0	0	0	1	0	0	0	0	0	0	0	0	1	other	0.999977	1.28e-05	1e-05	0.447864	0.545253	0.00686	1.3e-05	1e-05	0.470643	0.094469	0.127436	0.307413	1e-05	1e-05	1e-05	1e-05	0	0	0	0	0	0	0	1	0	0	0	0	0	0	0	0
350	JI0958	P. sativum	0	0	0	0	1	0	0	0	0	0	0	0	0	1	other	0.966015	0.0339752	1e-05	0.37399	0.53966	0.0863283	1.13333e-05	1e-05	0.459018	0.159952	0.364347	0.016643	1e-05	1e-05	1e-05	1e-05	0	0	0	0	0	0	0	1	0	0	0	0	0	0	0	0
351	JI1791	P. sativum	0	0	0	0	1	0	0	0	0	0	0	1	0	0	landrace	0.999978	1.18e-05	1e-05	0.486091	0.503052	0.010837	1e-05	1e-05	0.420442	0.493437	0.073238	1e-05	0.012841	1.3e-05	1e-05	1e-05	0	0	0	0	0	0	0	1	0	0	0	0	0	0	0	0
352	JI1922	P. sativum	0	0	0	0	1	0	0	0	0	0	0	1	0	0	landrace	0.763415	0.236575	1e-05	0.246758	0.509145	1e-05	0.244077	1.03333e-05	0.417597	0.347207	1e-05	1e-05	1e-05	0.235146	1e-05	1e-05	0	0	0	0	0	0	0	1	0	0	0	0	0	0	0	0
353	JI2274	P. sativum	0	0	0	0	1	0	0	0	0	0	0	0	1	0	cultivar	0.99998	1.02e-05	1e-05	0.411644	0.588326	1e-05	1e-05	1e-05	0.416306	1e-05	0.451201	0.132443	1e-05	1e-05	1e-05	1e-05	0	0	0	0	0	0	0	1	0	0	0	0	0	0	0	0
354
355
356
357	JI0210	P. sativum	0	0	0	0	1	0	0	0	0	0	0	0	1	0	cultivar	0.99998	1e-05	1e-05	1e-05	0.99996	1e-05	1e-05	1e-05	0.99993	1e-05	1e-05	1e-05	1e-05	1e-05	1e-05	1e-05	0	0	0	0	0	0	1	0	0	0	0	0	0	0	0	0
358	JI0257	P. sativum	0	0	0	0	1	0	0	0	0	0	0	0	0	1	other	0.99998	1e-05	1e-05	1e-05	0.99996	1e-05	1e-05	1e-05	0.99993	1e-05	1e-05	1e-05	1e-05	1e-05	1e-05	1e-05	0	0	0	0	0	0	1	0	0	0	0	0	0	0	0	0
359	JI0298	P. sativum	0	0	0	0	1	0	0	0	0	0	0	0	1	0	cultivar	0.99998	1e-05	1e-05	1e-05	0.99996	1e-05	1e-05	1e-05	0.99993	1e-05	1e-05	1e-05	1e-05	1e-05	1e-05	1e-05	0	0	0	0	0	0	1	0	0	0	0	0	0	0	0	0
360	JI0301	P. sativum	0	0	0	0	1	0	0	0	0	0	0	0	1	0	cultivar	0.99998	1e-05	1e-05	1e-05	0.99996	1e-05	1e-05	1e-05	0.99993	1e-05	1e-05	1e-05	1e-05	1e-05	1e-05	1e-05	0	0	0	0	0	0	1	0	0	0	0	0	0	0	0	0
361	JI0319	P. sativum	0	0	0	0	1	0	0	0	0	0	0	0	1	0	cultivar	0.99998	1e-05	1e-05	1e-05	0.99996	1e-05	1e-05	1e-05	0.99993	1e-05	1e-05	1e-05	1e-05	1e-05	1e-05	1e-05	0	0	0	0	0	0	1	0	0	0	0	0	0	0	0	0
362	JI0402	P. sativum	0	0	0	0	1	0	0	0	0	0	0	0	1	0	cultivar	0.99998	1e-05	1e-05	1e-05	0.99996	1e-05	1e-05	1e-05	0.99993	1e-05	1e-05	1e-05	1e-05	1e-05	1e-05	1e-05	0	0	0	0	0	0	1	0	0	0	0	0	0	0	0	0
363	JI0406	P. sativum	0	0	0	0	1	0	0	0	0	0	0	0	0	1	other	0.99998	1e-05	1e-05	1e-05	0.99996	1e-05	1e-05	1e-05	0.99993	1e-05	1e-05	1e-05	1e-05	1e-05	1e-05	1e-05	0	0	0	0	0	0	1	0	0	0	0	0	0	0	0	0
364	JI0420	P. sativum	0	0	0	0	1	0	0	0	0	0	0	0	1	0	cultivar	0.99998	1e-05	1e-05	1e-05	0.99996	1e-05	1e-05	1e-05	0.99993	1e-05	1e-05	1e-05	1e-05	1e-05	1e-05	1e-05	0	0	0	0	0	0	1	0	0	0	0	0	0	0	0	0
365	JI0430	P. sativum	0	0	0	0	1	0	0	0	0	0	0	0	1	0	cultivar	0.99998	1e-05	1e-05	1e-05	0.99996	1e-05	1e-05	1e-05	0.99993	1e-05	1e-05	1e-05	1e-05	1e-05	1e-05	1e-05	0	0	0	0	0	0	1	0	0	0	0	0	0	0	0	0
366	JI0441	P. sativum	0	0	0	0	1	0	0	0	0	0	0	0	1	0	cultivar	0.99998	1e-05	1e-05	1e-05	0.99996	1e-05	1e-05	1e-05	0.99993	1e-05	1e-05	1e-05	1e-05	1e-05	1e-05	1e-05	0	0	0	0	0	0	1	0	0	0	0	0	0	0	0	0
367	JI0504	P. sativum	0	0	0	0	1	0	0	0	0	0	0	0	1	0	cultivar	0.99998	1e-05	1e-05	1e-05	0.99996	1e-05	1e-05	1e-05	0.99993	1e-05	1e-05	1e-05	1e-05	1e-05	1e-05	1e-05	0	0	0	0	0	0	1	0	0	0	0	0	0	0	0	0
368	JI0506	P. sativum	0	0	0	0	1	0	0	0	0	0	0	0	1	0	cultivar	0.99998	1e-05	1e-05	1e-05	0.99996	1e-05	1e-05	1e-05	0.99993	1e-05	1e-05	1e-05	1e-05	1e-05	1e-05	1e-05	0	0	0	0	0	0	1	0	0	0	0	0	0	0	0	0
369	JI0539	P. sativum	0	0	0	0	1	0	0	0	0	0	0	0	1	0	cultivar	0.99998	1e-05	1e-05	1e-05	0.99996	1e-05	1e-05	1e-05	0.99993	1e-05	1e-05	1e-05	1e-05	1e-05	1e-05	1e-05	0	0	0	0	0	0	1	0	0	0	0	0	0	0	0	0
370	JI0614	P. sativum	0	0	0	0	1	0	0	0	0	0	0	0	0	1	other	0.99998	1e-05	1e-05	1e-05	0.99996	1e-05	1e-05	1e-05	0.99993	1e-05	1e-05	1e-05	1e-05	1e-05	1e-05	1e-05	0	0	0	0	0	0	1	0	0	0	0	0	0	0	0	0
371	JI0653	P. sativum	0	0	0	0	1	0	0	0	0	0	0	0	1	0	cultivar	0.99998	1e-05	1e-05	1e-05	0.99996	1e-05	1e-05	1e-05	0.99993	1e-05	1e-05	1e-05	1e-05	1e-05	1e-05	1e-05	0	0	0	0	0	0	1	0	0	0	0	0	0	0	0	0
372	JI0665	P. sativum	0	0	0	0	1	0	0	0	0	0	0	0	1	0	cultivar	0.99998	1e-05	1e-05	1e-05	0.99996	1e-05	1e-05	1e-05	0.99993	1e-05	1e-05	1e-05	1e-05	1e-05	1e-05	1e-05	0	0	0	0	0	0	1	0	0	0	0	0	0	0	0	0
373	JI0814	P. sativum	0	0	0	0	1	0	0	0	0	0	0	0	0	1	other	0.99998	1e-05	1e-05	1e-05	0.99996	1e-05	1e-05	1e-05	0.99993	1e-05	1e-05	1e-05	1e-05	1e-05	1e-05	1e-05	0	0	0	0	0	0	1	0	0	0	0	0	0	0	0	0
374	JI0877	P. sativum	0	0	0	0	1	0	0	0	0	0	0	0	1	0	cultivar	0.99998	1e-05	1e-05	1e-05	0.99996	1e-05	1e-05	1e-05	0.99993	1e-05	1e-05	1e-05	1e-05	1e-05	1e-05	1e-05	0	0	0	0	0	0	1	0	0	0	0	0	0	0	0	0
375	JI0884	P. sativum	0	0	0	0	1	0	0	0	0	0	0	0	1	0	cultivar	0.99998	1e-05	1e-05	1e-05	0.99996	1e-05	1e-05	1e-05	0.99993	1e-05	1e-05	1e-05	1e-05	1e-05	1e-05	1e-05	0	0	0	0	0	0	1	0	0	0	0	0	0	0	0	0
376	JI1017	P. sativum	0	0	0	0	1	0	0	0	0	0	0	0	1	0	cultivar	0.99998	1e-05	1e-05	1e-05	0.99996	1e-05	1e-05	1e-05	0.99993	1e-05	1e-05	1e-05	1e-05	1e-05	1e-05	1e-05	0	0	0	0	0	0	1	0	0	0	0	0	0	0	0	0
377	JI1165	P. sativum	0	0	0	0	1	0	0	0	0	0	0	0	1	0	cultivar	0.99998	1e-05	1e-05	1e-05	0.99996	1e-05	1e-05	1e-05	0.99993	1e-05	1e-05	1e-05	1e-05	1e-05	1e-05	1e-05	0	0	0	0	0	0	1	0	0	0	0	0	0	0	0	0
378	JI1229	P. sativum	0	0	0	0	1	0	0	0	0	0	0	0	1	0	cultivar	0.99998	1e-05	1e-05	1e-05	0.99996	1e-05	1e-05	1e-05	0.99993	1e-05	1e-05	1e-05	1e-05	1e-05	1e-05	1e-05	0	0	0	0	0	0	1	0	0	0	0	0	0	0	0	0
379	JI1280	P. sativum	0	0	0	0	1	0	0	0	0	0	0	0	1	0	cultivar	0.99998	1e-05	1e-05	1e-05	0.99996	1e-05	1e-05	1e-05	0.99993	1e-05	1e-05	1e-05	1e-05	1e-05	1e-05	1e-05	0	0	0	0	0	0	1	0	0	0	0	0	0	0	0	0
380	JI1569	P. sativum	0	0	0	0	1	0	0	0	0	0	0	0	1	0	cultivar	0.99998	1e-05	1e-05	1e-05	0.99996	1e-05	1e-05	1e-05	0.99993	1e-05	1e-05	1e-05	1e-05	1e-05	1e-05	1e-05	0	0	0	0	0	0	1	0	0	0	0	0	0	0	0	0
381	JI1577	P. sativum	0	0	0	0	1	0	0	0	0	0	0	0	1	0	cultivar	0.99998	1e-05	1e-05	1e-05	0.99996	1e-05	1e-05	1e-05	0.99993	1e-05	1e-05	1e-05	1e-05	1e-05	1e-05	1e-05	0	0	0	0	0	0	1	0	0	0	0	0	0	0	0	0
382	JI1721	P. sativum	0	0	0	0	1	0	0	0	0	0	0	0	1	0	cultivar	0.99998	1e-05	1e-05	1e-05	0.99996	1e-05	1e-05	1e-05	0.99993	1e-05	1e-05	1e-05	1e-05	1e-05	1e-05	1e-05	0	0	0	0	0	0	1	0	0	0	0	0	0	0	0	0
383	JI1775	P. sativum	0	0	0	0	1	0	0	0	0	0	0	1	0	0	landrace	0.99998	1e-05	1e-05	1e-05	0.99996	1e-05	1e-05	1e-05	0.99993	1e-05	1e-05	1e-05	1e-05	1e-05	1e-05	1e-05	0	0	0	0	0	0	1	0	0	0	0	0	0	0	0	0
384	JI1829	P. sativum	0	0	0	0	1	0	0	0	0	0	0	1	0	0	landrace	0.99998	1e-05	1e-05	1e-05	0.99996	1e-05	1e-05	1e-05	0.99993	1e-05	1e-05	1e-05	1e-05	1e-05	1e-05	1e-05	0	0	0	0	0	0	1	0	0	0	0	0	0	0	0	0
385	JI2371	P. sativum	0	0	0	0	1	0	0	0	0	0	0	0	0	1	other	0.99998	1e-05	1e-05	1e-05	0.99996	1e-05	1e-05	1e-05	0.99993	1e-05	1e-05	1e-05	1e-05	1e-05	1e-05	1e-05	0	0	0	0	0	0	1	0	0	0	0	0	0	0	0	0
386	JI3027	P. sativum	0	0	0	0	1	0	0	0	0	0	0	0	0	1	other	0.99998	1e-05	1e-05	1e-05	0.99996	1e-05	1e-05	1e-05	0.99993	1e-05	1e-05	1e-05	1e-05	1e-05	1e-05	1e-05	0	0	0	0	0	0	1	0	0	0	0	0	0	0	0	0
387	JI0327	P. sativum	0	0	0	0	1	0	0	0	0	0	0	0	1	0	cultivar	0.99998	1.02e-05	1e-05	1e-05	0.99996	1e-05	1e-05	1e-05	0.99993	1e-05	1e-05	1e-05	1e-05	1e-05	1e-05	1e-05	0	0	0	0	0	0	1	0	0	0	0	0	0	0	0	0
388	JI1200	P. sativum	0	0	0	0	1	0	0	0	0	0	0	0	0	1	other	0.999979	1.08e-05	1e-05	1e-05	0.99996	1e-05	1e-05	1e-05	0.99993	1e-05	1e-05	1e-05	1e-05	1e-05	1e-05	1e-05	0	0	0	0	0	0	1	0	0	0	0	0	0	0	0	0
389	JI1231	P. sativum	0	0	0	0	1	0	0	0	0	0	0	0	0	1	other	0.999979	1.1e-05	1e-05	1e-05	0.99996	1e-05	1e-05	1e-05	0.99993	1e-05	1e-05	1e-05	1e-05	1e-05	1e-05	1e-05	0	0	0	0	0	0	1	0	0	0	0	0	0	0	0	0
390	JI0727	P. sativum	0	0	0	0	1	0	0	0	0	0	0	0	0	1	other	0.999978	1.22e-05	1e-05	1e-05	0.99996	1e-05	1e-05	1e-05	0.99993	1e-05	1e-05	1e-05	1e-05	1e-05	1e-05	1e-05	0	0	0	0	0	0	1	0	0	0	0	0	0	0	0	0
391	JI0991	P. sativum	0	0	0	0	1	0	0	0	0	0	0	0	1	0	cultivar	0.99998	1.04e-05	1e-05	1.03333e-05	0.99996	1e-05	1e-05	1e-05	0.99993	1e-05	1e-05	1e-05	1e-05	1e-05	1e-05	1e-05	0	0	0	0	0	0	1	0	0	0	0	0	0	0	0	0
392	JI0400	P. sativum	0	0	0	0	1	0	0	0	0	0	0	0	1	0	cultivar	0.99998	1e-05	1e-05	1e-05	0.99996	1e-05	1e-05	1.03333e-05	0.99993	1e-05	1e-05	1e-05	1e-05	1e-05	1e-05	1e-05	0	0	0	0	0	0	1	0	0	0	0	0	0	0	0	0
393	JI0681	P. sativum	0	0	0	0	1	0	0	0	0	0	0	0	1	0	cultivar	0.99998	1e-05	1e-05	1.06667e-05	0.999959	1e-05	1e-05	1e-05	0.99993	1e-05	1e-05	1e-05	1e-05	1e-05	1e-05	1e-05	0	0	0	0	0	0	1	0	0	0	0	0	0	0	0	0
394	JI0737	P. sativum	0	0	0	0	1	0	0	0	0	0	0	0	0	1	other	0.99998	1e-05	1e-05	1.06667e-05	0.999959	1e-05	1e-05	1e-05	0.99993	1e-05	1e-05	1e-05	1e-05	1e-05	1e-05	1e-05	0	0	0	0	0	0	1	0	0	0	0	0	0	0	0	0
395	JI1237	P. sativum	0	0	0	0	1	0	0	0	0	0	0	0	0	1	other	0.99998	1e-05	1e-05	1e-05	0.999959	1e-05	1e-05	1.06667e-05	0.99993	1e-05	1e-05	1e-05	1e-05	1e-05	1e-05	1e-05	0	0	0	0	0	0	1	0	0	0	0	0	0	0	0	0
396	JI0935	P. sativum	0	0	0	0	1	0	0	0	0	0	0	0	1	0	cultivar	0.99998	1e-05	1e-05	1e-05	0.999959	1e-05	1.06667e-05	1e-05	0.99993	1e-05	1e-05	1e-05	1e-05	1e-05	1e-05	1e-05	0	0	0	0	0	0	1	0	0	0	0	0	0	0	0	0
397	JI0335	P. sativum	0	0	0	0	1	0	0	0	0	0	0	0	1	0	cultivar	0.99998	1e-05	1e-05	1e-05	0.999959	1e-05	1.03333e-05	1.06667e-05	0.99993	1e-05	1e-05	1e-05	1e-05	1e-05	1e-05	1e-05	0	0	0	0	0	0	1	0	0	0	0	0	0	0	0	0
398	JI0573	P. sativum	0	0	0	0	1	0	0	0	0	0	0	0	0	1	other	0.99998	1e-05	1e-05	1e-05	0.999959	1e-05	1.13333e-05	1e-05	0.99993	1e-05	1e-05	1e-05	1e-05	1e-05	1e-05	1e-05	0	0	0	0	0	0	1	0	0	0	0	0	0	0	0	0
399	JI0329	P. sativum	0	0	0	0	1	0	0	0	0	0	0	0	1	0	cultivar	0.99998	1.02e-05	1e-05	1e-05	0.999959	1e-05	1e-05	1.13333e-05	0.99993	1e-05	1e-05	1e-05	1e-05	1e-05	1e-05	1e-05	0	0	0	0	0	0	1	0	0	0	0	0	0	0	0	0
400	JI0314	P. sativum	0	0	0	0	1	0	0	0	0	0	0	0	1	0	cultivar	0.99998	1e-05	1e-05	1e-05	0.999958	1e-05	1.06667e-05	1.1e-05	0.99993	1e-05	1e-05	1e-05	1e-05	1e-05	1e-05	1e-05	0	0	0	0	0	0	1	0	0	0	0	0	0	0	0	0
401	JI1282	P. sativum	0	0	0	0	1	0	0	0	0	0	0	0	1	0	cultivar	0.99998	1e-05	1e-05	1e-05	0.999958	1.16667e-05	1e-05	1e-05	0.99993	1e-05	1e-05	1e-05	1e-05	1e-05	1e-05	1e-05	0	0	0	0	0	0	1	0	0	0	0	0	0	0	0	0
402	JI0304	P. sativum	0	0	0	0	1	0	0	0	0	0	0	0	1	0	cultivar	0.999979	1.06e-05	1e-05	1e-05	0.999958	1e-05	1e-05	1.16667e-05	0.99993	1e-05	1e-05	1e-05	1e-05	1e-05	1e-05	1e-05	0	0	0	0	0	0	1	0	0	0	0	0	0	0	0	0
403	JI1555	P. sativum	0	0	0	0	1	0	0	0	0	0	0	1	0	0	landrace	0.99998	1e-05	1e-05	1e-05	0.999958	1.13333e-05	1.03333e-05	1e-05	0.99993	1e-05	1e-05	1e-05	1e-05	1e-05	1e-05	1e-05	0	0	0	0	0	0	1	0	0	0	0	0	0	0	0	0
404	JI0491	P. sativum	0	0	0	0	1	0	0	0	0	0	0	0	1	0	cultivar	0.99998	1e-05	1e-05	1.06667e-05	0.999958	1e-05	1e-05	1.1e-05	0.99993	1e-05	1e-05	1e-05	1e-05	1e-05	1e-05	1e-05	0	0	0	0	0	0	1	0	0	0	0	0	0	0	0	0
405	JI0037	P. sativum	0	0	0	0	1	0	0	0	0	0	0	0	0	1	other	0.99998	1e-05	1e-05	1e-05	0.999958	1e-05	1e-05	1.2e-05	0.99993	1e-05	1e-05	1e-05	1e-05	1e-05	1e-05	1e-05	0	0	0	0	0	0	1	0	0	0	0	0	0	0	0	0
406	JI0428	P. sativum	0	0	0	0	1	0	0	0	0	0	0	0	1	0	cultivar	0.99998	1e-05	1e-05	1e-05	0.999958	1e-05	1.2e-05	1e-05	0.99993	1e-05	1e-05	1e-05	1e-05	1e-05	1e-05	1e-05	0	0	0	0	0	0	1	0	0	0	0	0	0	0	0	0
407	JI2434	P. sativum	0	0	0	0	1	0	0	0	0	0	0	0	1	0	cultivar	0.99998	1e-05	1e-05	1e-05	0.999958	1e-05	1e-05	1.23333e-05	0.99993	1e-05	1e-05	1e-05	1e-05	1e-05	1e-05	1e-05	0	0	0	0	0	0	1	0	0	0	0	0	0	0	0	0
408	JI0859	P. sativum	0	0	0	0	1	0	0	0	0	0	0	0	1	0	cultivar	0.99998	1e-05	1e-05	1.26667e-05	0.999957	1e-05	1e-05	1e-05	0.99993	1e-05	1e-05	1e-05	1e-05	1e-05	1e-05	1e-05	0	0	0	0	0	0	1	0	0	0	0	0	0	0	0	0
409	JI0829	P. sativum	0	0	0	0	1	0	0	0	0	0	0	0	0	1	other	0.99998	1e-05	1e-05	1.06667e-05	0.999957	1e-05	1.2e-05	1e-05	0.99993	1e-05	1e-05	1e-05	1e-05	1e-05	1e-05	1e-05	0	0	0	0	0	0	1	0	0	0	0	0	0	0	0	0
410	JI0361	P. sativum	0	0	0	0	1	0	0	0	0	0	0	0	1	0	cultivar	0.99998	1e-05	1e-05	1e-05	0.999957	1e-05	1e-05	1.3e-05	0.99993	1e-05	1e-05	1e-05	1e-05	1e-05	1e-05	1e-05	0	0	0	0	0	0	1	0	0	0	0	0	0	0	0	0
411	JI0870	P. sativum	0	0	0	0	1	0	0	0	0	0	0	0	1	0	cultivar	0.99998	1e-05	1e-05	1e-05	0.999957	1e-05	1e-05	1.3e-05	0.99993	1e-05	1e-05	1e-05	1e-05	1e-05	1e-05	1e-05	0	0	0	0	0	0	1	0	0	0	0	0	0	0	0	0
412	JI0874	P. sativum	0	0	0	0	1	0	0	0	0	0	0	0	1	0	cultivar	0.99998	1e-05	1e-05	1e-05	0.999957	1e-05	1.3e-05	1e-05	0.99993	1e-05	1e-05	1e-05	1e-05	1e-05	1e-05	1e-05	0	0	0	0	0	0	1	0	0	0	0	0	0	0	0	0
413	JI1720	P. sativum	0	0	0	0	1	0	0	0	0	0	0	0	1	0	cultivar	0.99998	1.02e-05	1e-05	1e-05	0.999957	1e-05	1.3e-05	1e-05	0.99993	1e-05	1e-05	1e-05	1e-05	1e-05	1e-05	1e-05	0	0	0	0	0	0	1	0	0	0	0	0	0	0	0	0
414	JI0303	P. sativum	0	0	0	0	1	0	0	0	0	0	0	0	1	0	cultivar	0.99998	1e-05	1e-05	1e-05	0.999957	1e-05	1.03333e-05	1.3e-05	0.99993	1e-05	1e-05	1e-05	1e-05	1e-05	1e-05	1e-05	0	0	0	0	0	0	1	0	0	0	0	0	0	0	0	0
415	JI0389	P. sativum	0	0	0	0	1	0	0	0	0	0	0	0	1	0	cultivar	0.99998	1e-05	1e-05	1e-05	0.999956	1.3e-05	1e-05	1.1e-05	0.99993	1e-05	1e-05	1e-05	1e-05	1e-05	1e-05	1e-05	0	0	0	0	0	0	1	0	0	0	0	0	0	0	0	0
416	JI0305	P. sativum	0	0	0	0	1	0	0	0	0	0	0	0	1	0	cultivar	0.99998	1.02e-05	1e-05	1e-05	0.999956	1.1e-05	1.03333e-05	1.3e-05	0.99993	1e-05	1e-05	1e-05	1e-05	1e-05	1e-05	1e-05	0	0	0	0	0	0	1	0	0	0	0	0	0	0	0	0
417	JI0799	P. sativum	0	0	0	0	1	0	0	0	0	0	0	0	1	0	cultivar	0.99998	1e-05	1e-05	1e-05	0.999955	1e-05	1.3e-05	1.13333e-05	0.99993	1e-05	1e-05	1e-05	1e-05	1e-05	1e-05	1e-05	0	0	0	0	0	0	1	0	0	0	0	0	0	0	0	0
418	JI0417	P. sativum	0	0	0	0	1	0	0	0	0	0	0	0	1	0	cultivar	0.99998	1e-05	1e-05	1e-05	0.999954	1e-05	1.43333e-05	1.2e-05	0.99993	1e-05	1e-05	1e-05	1e-05	1e-05	1e-05	1e-05	0	0	0	0	0	0	1	0	0	0	0	0	0	0	0	0
419	JI0330	P. sativum	0	0	0	0	1	0	0	0	0	0	0	0	1	0	cultivar	0.99998	1e-05	1e-05	1e-05	0.99996	1e-05	1e-05	1e-05	0.999929	1e-05	1.1e-05	1e-05	1e-05	1e-05	1e-05	1e-05	0	0	0	0	0	0	1	0	0	0	0	0	0	0	0	0
420	JI0571	P. sativum	0	0	0	0	1	0	0	0	0	0	0	0	0	1	other	0.99998	1e-05	1e-05	1e-05	0.99996	1e-05	1e-05	1e-05	0.999929	1e-05	1e-05	1e-05	1e-05	1e-05	1.1e-05	1e-05	0	0	0	0	0	0	1	0	0	0	0	0	0	0	0	0
421	JI0318	P. sativum	0	0	0	0	1	0	0	0	0	0	0	0	1	0	cultivar	0.99998	1e-05	1e-05	1.06667e-05	0.999959	1e-05	1.03333e-05	1e-05	0.999929	1e-05	1e-05	1e-05	1e-05	1e-05	1e-05	1e-05	0	0	0	0	0	0	1	0	0	0	0	0	0	0	0	0
422	JI1201	P. sativum	0	0	0	0	1	0	0	0	0	0	0	0	0	1	other	0.99998	1e-05	1e-05	1e-05	0.999959	1e-05	1.13333e-05	1e-05	0.999929	1e-05	1e-05	1e-05	1e-05	1e-05	1e-05	1.1e-05	0	0	0	0	0	0	1	0	0	0	0	0	0	0	0	0
423	JI0127	P. sativum	0	0	0	0	1	0	0	0	0	0	0	0	0	1	other	0.99998	1.04e-05	1e-05	1e-05	0.999957	1e-05	1.06667e-05	1.26667e-05	0.999928	1e-05	1.2e-05	1e-05	1e-05	1e-05	1e-05	1e-05	0	0	0	0	0	0	1	0	0	0	0	0	0	0	0	0
424	JI0498	P. sativum	0	0	0	0	1	0	0	0	0	0	0	0	1	0	cultivar	0.99998	1e-05	1e-05	1e-05	0.99996	1.03333e-05	1e-05	1e-05	0.999927	1e-05	1.3e-05	1e-05	1e-05	1e-05	1e-05	1e-05	0	0	0	0	0	0	1	0	0	0	0	0	0	0	0	0
425	JI0841	P. sativum	0	0	0	0	1	0	0	0	0	0	0	0	0	1	other	0.99998	1e-05	1e-05	1.1e-05	0.999955	1.16667e-05	1.23333e-05	1e-05	0.999926	1e-05	1e-05	1e-05	1e-05	1e-05	1e-05	1.4e-05	0	0	0	0	0	0	1	0	0	0	0	0	0	0	0	0
426	JI0781	P. sativum	0	0	0	0	1	0	0	0	0	0	0	0	1	0	cultivar	0.99998	1e-05	1e-05	1.03333e-05	0.99996	1e-05	1e-05	1e-05	0.999923	1e-05	1e-05	1.3e-05	1.4e-05	1e-05	1e-05	1e-05	0	0	0	0	0	0	1	0	0	0	0	0	0	0	0	0
427	JI0721	P. sativum	0	0	0	0	1	0	0	0	0	0	0	0	1	0	cultivar	0.99998	1e-05	1e-05	1e-05	0.99996	1e-05	1e-05	1e-05	0.999916	1e-05	1e-05	1.5e-05	1e-05	1e-05	1e-05	1.9e-05	0	0	0	0	0	0	1	0	0	0	0	0	0	0	0	0
428	JI0072	P. sativum	0	0	0	0	1	0	0	0	0	0	0	0	0	1	other	0.999979	1.1e-05	1e-05	1e-05	0.999958	1e-05	1.2e-05	1e-05	0.995962	1e-05	1e-05	0.003977	1e-05	1e-05	1e-05	1e-05	0	0	0	0	0	0	1	0	0	0	0	0	0	0	0	0
429	JI0837	P. sativum	0	0	0	0	1	0	0	0	0	0	0	0	0	1	other	0.99998	1e-05	1e-05	1e-05	0.99996	1e-05	1e-05	1e-05	0.992433	0.007507	1e-05	1e-05	1e-05	1e-05	1e-05	1e-05	0	0	0	0	0	0	1	0	0	0	0	0	0	0	0	0
430	JI0607	P. sativum	0	0	0	0	1	0	0	0	0	0	0	0	1	0	cultivar	0.99998	1.02e-05	1e-05	1.03333e-05	0.999958	1.13333e-05	1e-05	1e-05	0.992388	1e-05	1e-05	0.007552	1e-05	1e-05	1e-05	1e-05	0	0	0	0	0	0	1	0	0	0	0	0	0	0	0	0
431	JI2787	P. sativum	0	0	0	0	1	0	0	0	0	0	0	0	1	0	cultivar	0.999979	1.14e-05	1e-05	1e-05	0.999959	1.03333e-05	1.06667e-05	1e-05	0.992107	1e-05	1e-05	0.007832	1e-05	1.1e-05	1e-05	1e-05	0	0	0	0	0	0	1	0	0	0	0	0	0	0	0	0
432	JI0460	P. sativum	0	0	0	0	1	0	0	0	0	0	0	0	1	0	cultivar	0.99998	1e-05	1e-05	1e-05	0.99996	1e-05	1e-05	1e-05	0.986831	1e-05	0.013109	1e-05	1e-05	1e-05	1e-05	1e-05	0	0	0	0	0	0	1	0	0	0	0	0	0	0	0	0
433	JI0536	P. sativum	0	0	0	0	1	0	0	0	0	0	0	0	1	0	cultivar	0.99998	1e-05	1e-05	1e-05	0.99996	1e-05	1e-05	1e-05	0.986397	1e-05	1.2e-05	0.013541	1e-05	1e-05	1e-05	1e-05	0	0	0	0	0	0	1	0	0	0	0	0	0	0	0	0
434	JI1194	P. sativum	0	0	0	0	1	0	0	0	0	0	0	0	0	1	other	0.987801	0.0121888	1e-05	1e-05	0.985655	1e-05	0.0143147	1e-05	0.983568	1e-05	1e-05	1e-05	1e-05	0.01637	1.2e-05	1e-05	0	0	0	0	0	0	1	0	0	0	0	0	0	0	0	0
435	JI2317	P. sativum	0	0	0	0	1	0	0	0	0	0	0	0	1	0	cultivar	0.984042	0.0159484	1e-05	1e-05	0.982736	1e-05	0.017234	1e-05	0.979977	1e-05	1e-05	1e-05	1e-05	0.019963	1e-05	1e-05	0	0	0	0	0	0	1	0	0	0	0	0	0	0	0	0
436	JI0662	P. sativum	0	0	0	0	1	0	0	0	0	0	0	0	1	0	cultivar	0.99998	1e-05	1e-05	1e-05	0.99996	1e-05	1e-05	1e-05	0.978551	0.021388	1e-05	1e-05	1e-05	1e-05	1e-05	1e-05	0	0	0	0	0	0	1	0	0	0	0	0	0	0	0	0
437	JI0496	P. sativum	0	0	0	0	1	0	0	0	0	0	0	0	0	1	other	0.999979	1e-05	1.06e-05	1.06667e-05	0.999957	1.2e-05	1e-05	1.03333e-05	0.971996	0.027944	1e-05	1e-05	1e-05	1e-05	1e-05	1e-05	0	0	0	0	0	0	1	0	0	0	0	0	0	0	0	0
438	JI0844	P. sativum	0	0	0	0	1	0	0	0	0	0	0	0	0	1	other	0.99998	1e-05	1e-05	0.0157107	0.984259	1e-05	1e-05	1e-05	0.968902	0.001529	0.026701	1e-05	0.002827	1e-05	1e-05	1e-05	0	0	0	0	0	0	1	0	0	0	0	0	0	0	0	0
439	JI1205	P. sativum	0	0	0	0	1	0	0	0	0	0	0	0	0	1	other	0.99998	1e-05	1e-05	0.0135707	0.986399	1e-05	1e-05	1e-05	0.967767	1e-05	1e-05	0.014708	0.017475	1e-05	1e-05	1e-05	0	0	0	0	0	0	1	0	0	0	0	0	0	0	0	0
440	JI0144	P. sativum	0	0	0	0	1	0	0	0	0	0	0	0	0	1	other	0.99998	1.02e-05	1e-05	0.0356877	0.964282	1e-05	1e-05	1e-05	0.965256	0.003997	1e-05	1e-05	0.030697	1e-05	1e-05	1e-05	0	0	0	0	0	0	1	0	0	0	0	0	0	0	0	0
441	JI0832	P. sativum	0	0	0	0	1	0	0	0	0	0	0	0	0	1	other	0.99998	1e-05	1e-05	0.0151823	0.984788	1e-05	1e-05	1e-05	0.965123	0.034817	1e-05	1e-05	1e-05	1e-05	1e-05	1e-05	0	0	0	0	0	0	1	0	0	0	0	0	0	0	0	0
442	JI0383	P. sativum	0	0	0	0	1	0	0	0	0	0	0	0	1	0	cultivar	0.99998	1e-05	1e-05	0.002214	0.997755	1e-05	1.1e-05	1e-05	0.961032	0.038908	1e-05	1e-05	1e-05	1e-05	1e-05	1e-05	0	0	0	0	0	0	1	0	0	0	0	0	0	0	0	0
443	JI2294	P. sativum	0	0	0	0	1	0	0	0	0	0	0	1	0	0	landrace	0.99998	1e-05	1e-05	1e-05	0.99996	1e-05	1e-05	1e-05	0.960241	0.039699	1e-05	1e-05	1e-05	1e-05	1e-05	1e-05	0	0	0	0	0	0	1	0	0	0	0	0	0	0	0	0
444	JI0554	P. sativum	0	0	0	0	1	0	0	0	0	0	0	0	1	0	cultivar	0.99998	1e-05	1e-05	1e-05	0.999956	1.2e-05	1.13333e-05	1e-05	0.958172	1e-05	0.041762	1e-05	1e-05	1.6e-05	1e-05	1e-05	0	0	0	0	0	0	1	0	0	0	0	0	0	0	0	0
445	JI0566	P. sativum	0	0	0	0	1	0	0	0	0	0	0	0	1	0	cultivar	0.99998	1e-05	1e-05	0.0112543	0.988716	1e-05	1e-05	1e-05	0.957494	0.042446	1e-05	1e-05	1e-05	1e-05	1e-05	1e-05	0	0	0	0	0	0	1	0	0	0	0	0	0	0	0	0
446	JI2711	P. sativum	0	0	0	0	1	0	0	0	0	0	0	0	0	1	other	0.99998	1e-05	1e-05	0.0127337	0.987233	1e-05	1.3e-05	1e-05	0.955622	0.044318	1e-05	1e-05	1e-05	1e-05	1e-05	1e-05	0	0	0	0	0	0	1	0	0	0	0	0	0	0	0	0
447	JI1210	P. sativum	0	0	0	0	1	0	0	0	0	0	0	0	1	0	cultivar	0.99998	1.04e-05	1e-05	0.0401603	0.95981	1e-05	1e-05	1e-05	0.94964	1e-05	0.0503	1e-05	1e-05	1e-05	1e-05	1e-05	0	0	0	0	0	0	1	0	0	0	0	0	0	0	0	0
448	JI2501	P. sativum	0	0	0	0	1	0	0	0	0	0	0	0	1	0	cultivar	0.975647	0.024343	1e-05	1e-05	0.971012	0.000138	0.02883	1e-05	0.943028	0.003315	0.005117	0.018925	1e-05	0.029586	1e-05	1e-05	0	0	0	0	0	0	1	0	0	0	0	0	0	0	0	0
449	JI2464	P. sativum	0	0	0	0	1	0	0	0	0	1	0	0	0	1	other wild/other	0.999978	1.18e-05	1e-05	0.0428687	0.95284	1e-05	0.00427	1e-05	0.940165	1e-05	1e-05	1e-05	0.059775	1e-05	1e-05	1e-05	0	0	0	0	0	0	1	0	0	0	0	0	0	0	0	0
450	JI0114	P. sativum	0	0	0	0	1	0	0	0	0	0	0	0	0	1	other	0.99998	1e-05	1e-05	0.0473817	0.952585	1.3e-05	1e-05	1e-05	0.939289	0.050994	1e-05	0.009667	1e-05	1e-05	1e-05	1e-05	0	0	0	0	0	0	1	0	0	0	0	0	0	0	0	0
451	JI1018	P. sativum	0	0	0	0	1	0	0	0	0	0	0	0	1	0	cultivar	0.99998	1e-05	1e-05	0.0367647	0.963205	1e-05	1e-05	1e-05	0.935046	0.055232	1e-05	1e-05	0.009668	1.1e-05	1.2e-05	1e-05	0	0	0	0	0	0	1	0	0	0	0	0	0	0	0	0
452	JI0582	P. sativum	0	0	0	0	1	0	0	0	0	0	0	0	1	0	cultivar	0.99998	1.04e-05	1e-05	1e-05	0.99996	1e-05	1e-05	1e-05	0.933619	1e-05	1e-05	0.066317	1e-05	1e-05	1e-05	1.4e-05	0	0	0	0	0	0	1	0	0	0	0	0	0	0	0	0
453	JI2110	P. sativum	0	0	0	0	1	0	0	0	0	0	0	0	1	0	cultivar	0.99998	1e-05	1e-05	1.26667e-05	0.999957	1e-05	1e-05	1e-05	0.932099	1e-05	1e-05	0.067841	1e-05	1e-05	1e-05	1e-05	0	0	0	0	0	0	1	0	0	0	0	0	0	0	0	0
454	JI0550	P. sativum	0	0	0	0	1	0	0	0	0	0	0	0	0	1	other	0.99998	1e-05	1e-05	1.03333e-05	0.999958	1.13333e-05	1e-05	1e-05	0.930381	1e-05	1e-05	0.069559	1e-05	1e-05	1e-05	1e-05	0	0	0	0	0	0	1	0	0	0	0	0	0	0	0	0
455	JI0790	P. sativum	0	0	0	0	1	0	0	0	0	0	0	0	1	0	cultivar	0.99998	1.04e-05	1e-05	0.0664357	0.933534	1e-05	1e-05	1e-05	0.926383	0.033725	0.026236	1e-05	0.013615	1e-05	1e-05	1e-05	0	0	0	0	0	0	1	0	0	0	0	0	0	0	0	0
456	JI2219	P. sativum	0	0	0	0	1	0	0	0	0	0	0	0	0	1	other	0.993859	0.006131	1e-05	1e-05	0.977537	1e-05	0.022433	1e-05	0.925444	1e-05	0.027372	1e-05	0.047134	1e-05	1e-05	1e-05	0	0	0	0	0	0	1	0	0	0	0	0	0	0	0	0
457	JI2240	P. sativum	0	0	0	0	1	0	0	0	0	0	0	0	1	0	cultivar	0.99998	1e-05	1e-05	0.000691333	0.999279	1e-05	1e-05	1e-05	0.924842	0.075098	1e-05	1e-05	1e-05	1e-05	1e-05	1e-05	0	0	0	0	0	0	1	0	0	0	0	0	0	0	0	0
458	JI1748	P. sativum	0	0	0	0	1	0	0	0	0	0	0	1	0	0	landrace	0.99998	1e-05	1e-05	0.0521967	0.946063	1e-05	0.00172033	1e-05	0.91743	0.017839	0.064682	1e-05	1e-05	1e-05	1e-05	1e-05	0	0	0	0	0	0	1	0	0	0	0	0	0	0	0	0
459	JI1747	P. sativum	0	0	0	0	1	0	0	0	0	0	0	0	1	0	cultivar	0.99998	1e-05	1e-05	0.0383653	0.961605	1e-05	1e-05	1e-05	0.915662	0.068561	0.015726	1e-05	1e-05	1e-05	1e-05	1e-05	0	0	0	0	0	0	1	0	0	0	0	0	0	0	0	0
460	JI0651	P. sativum	0	0	0	0	1	0	0	0	0	0	0	0	1	0	cultivar	0.99998	1.04e-05	1e-05	0.0315227	0.968447	1e-05	1e-05	1e-05	0.905454	0.094486	1e-05	1e-05	1e-05	1e-05	1e-05	1e-05	0	0	0	0	0	0	1	0	0	0	0	0	0	0	0	0
461	JI1313	P. sativum	0	0	0	0	1	0	0	0	0	0	0	0	1	0	cultivar	0.99998	1.02e-05	1e-05	0.0496827	0.950287	1e-05	1e-05	1e-05	0.89913	1e-05	0.100805	1e-05	1e-05	1.5e-05	1e-05	1e-05	0	0	0	0	0	0	1	0	0	0	0	0	0	0	0	0
462	JI2393	P. sativum	0	0	0	0	1	0	0	0	0	0	0	0	0	1	other	0.994006	0.0059836	1e-05	0.0244557	0.954263	1e-05	0.0212613	1e-05	0.898017	0.017609	0.032522	1e-05	0.051813	1e-05	1e-05	1e-05	0	0	0	0	0	0	1	0	0	0	0	0	0	0	0	0
463	JI3029	P. sativum	0	0	0	0	1	0	0	0	0	0	0	0	0	1	other	0.900726	0.0992642	1e-05	1e-05	0.885589	1e-05	0.114381	1e-05	0.885258	1e-05	1e-05	1e-05	1e-05	0.114682	1e-05	1e-05	0	0	0	0	0	0	1	0	0	0	0	0	0	0	0	0
464	JI2108	P. sativum	0	0	0	0	1	0	0	0	0	0	0	0	1	0	cultivar	0.999979	1.12e-05	1e-05	0.0871543	0.912816	1e-05	1e-05	1e-05	0.884831	0.098716	0.016403	1e-05	1e-05	1e-05	1e-05	1e-05	0	0	0	0	0	0	1	0	0	0	0	0	0	0	0	0
465	JI2699	P. sativum	0	0	0	0	1	0	0	0	0	0	0	0	1	0	cultivar	0.99998	1e-05	1e-05	0.0790297	0.92094	1e-05	1e-05	1e-05	0.884189	1e-05	1e-05	0.115751	1e-05	1e-05	1e-05	1e-05	0	0	0	0	0	0	1	0	0	0	0	0	0	0	0	0
466	JI0720	P. sativum	0	0	0	0	1	0	0	0	0	0	0	0	1	0	cultivar	0.99998	1e-05	1e-05	0.0993903	0.90058	1e-05	1e-05	1e-05	0.87728	0.100276	1.8e-05	0.01912	0.003276	1e-05	1e-05	1e-05	0	0	0	0	0	0	1	0	0	0	0	0	0	0	0	0
467	JI1303	P. sativum	0	0	0	0	1	0	0	0	0	0	0	0	1	0	cultivar	0.99998	1e-05	1e-05	0.0869737	0.912996	1e-05	1e-05	1e-05	0.876696	0.095863	1e-05	0.027391	1e-05	1e-05	1e-05	1e-05	0	0	0	0	0	0	1	0	0	0	0	0	0	0	0	0
468	JI0584	P. sativum	0	0	0	0	1	0	0	0	0	0	0	0	1	0	cultivar	0.99998	1e-05	1e-05	0.070274	0.929696	1e-05	1e-05	1e-05	0.876212	1e-05	0.057129	0.066607	1e-05	1.2e-05	1e-05	1e-05	0	0	0	0	0	0	1	0	0	0	0	0	0	0	0	0
469	JI0817	P. sativum	0	0	0	0	1	0	0	0	0	0	0	0	0	1	other	0.99998	1e-05	1e-05	0.103154	0.896816	1e-05	1e-05	1e-05	0.875719	0.007519	1e-05	0.116713	1e-05	1e-05	1e-05	1e-05	0	0	0	0	0	0	1	0	0	0	0	0	0	0	0	0
470	JI0474	P. sativum	0	0	0	0	1	0	0	0	0	0	0	0	1	0	cultivar	0.99998	1e-05	1e-05	0.098034	0.901933	1e-05	1e-05	1.3e-05	0.874931	0.079654	1e-05	0.045366	1e-05	1e-05	1e-05	1e-05	0	0	0	0	0	0	1	0	0	0	0	0	0	0	0	0
471	JI1147	P. sativum	0	0	0	0	1	0	0	0	0	0	0	1	0	0	landrace	0.99998	1e-05	1e-05	0.078145	0.921822	1e-05	1e-05	1.3e-05	0.871502	0.128438	1e-05	1e-05	1e-05	1e-05	1e-05	1e-05	0	0	0	0	0	0	1	0	0	0	0	0	0	0	0	0
472	JI1562	P. sativum	0	0	0	0	1	0	0	0	0	0	0	0	0	1	other	0.991323	1e-05	0.0086668	0.0896987	0.897731	1e-05	0.005727	0.00683267	0.871301	0.10664	0.008861	1e-05	0.001453	0.006143	0.005582	1e-05	0	0	0	0	0	0	1	0	0	0	0	0	0	0	0	0
473	JI1423	P. sativum	0	0	0	0	1	0	0	0	0	0	0	0	0	1	other	0.991157	0.0088332	1e-05	0.103801	0.884981	1e-05	0.0111977	1e-05	0.8711	1e-05	1e-05	1e-05	0.12884	1e-05	1e-05	1e-05	0	0	0	0	0	0	1	0	0	0	0	0	0	0	0	0
474	JI0780	P. sativum	0	0	0	0	1	0	0	0	0	0	0	0	0	1	other	0.99998	1e-05	1e-05	0.107428	0.892542	1e-05	1e-05	1e-05	0.869628	0.078195	1e-05	0.052126	1e-05	1e-05	1e-05	1e-05	0	0	0	0	0	0	1	0	0	0	0	0	0	0	0	0
475	JI0531	P. sativum	0	0	0	0	1	0	0	0	0	0	0	0	1	0	cultivar	0.99998	1e-05	1e-05	0.081125	0.918845	1e-05	1e-05	1e-05	0.868976	0.130964	1e-05	1e-05	1e-05	1e-05	1e-05	1e-05	0	0	0	0	0	0	1	0	0	0	0	0	0	0	0	0
476	JI0774	P. sativum	0	0	0	0	1	0	0	0	0	0	0	0	0	1	other	0.999979	1.1e-05	1e-05	0.0462103	0.935694	0.018076	1e-05	1e-05	0.864986	0.111447	0.023512	1e-05	1e-05	1e-05	1e-05	1.4e-05	0	0	0	0	0	0	1	0	0	0	0	0	0	0	0	0
477	JI2221	P. sativum	0	0	0	0	1	0	0	0	0	0	0	0	0	1	other	0.98625	0.0137402	1e-05	0.0695743	0.908728	1e-05	0.0216783	1e-05	0.86407	0.049759	0.03254	1e-05	0.050768	0.002833	1e-05	1e-05	0	0	0	0	0	0	1	0	0	0	0	0	0	0	0	0
478	JI0568	P. sativum	0	0	0	0	1	0	0	0	0	0	0	0	1	0	cultivar	0.99998	1.04e-05	1e-05	0.116348	0.883622	1e-05	1e-05	1e-05	0.863926	0.080051	1e-05	0.055972	1e-05	1.1e-05	1e-05	1e-05	0	0	0	0	0	0	1	0	0	0	0	0	0	0	0	0
479	JI2017	P. sativum	0	0	0	0	1	0	0	0	0	0	0	0	0	1	other	0.99998	1e-05	1e-05	0.137761	0.862209	1e-05	1e-05	1e-05	0.860916	1e-05	1e-05	0.120582	0.018452	1e-05	1e-05	1e-05	0	0	0	0	0	0	1	0	0	0	0	0	0	0	0	0
480	JI1214	P. sativum	0	0	0	0	1	0	0	0	0	0	0	0	1	0	cultivar	0.99998	1.02e-05	1e-05	0.0836457	0.892902	0.0234313	1.06667e-05	1e-05	0.860834	0.036876	0.102239	1e-05	1e-05	1e-05	1e-05	1e-05	0	0	0	0	0	0	1	0	0	0	0	0	0	0	0	0
481	JI0399	P. sativum	0	0	0	0	1	0	0	0	0	0	0	0	1	0	cultivar	0.999979	1.08e-05	1e-05	0.11861	0.881357	1.26667e-05	1e-05	1e-05	0.859868	0.140072	1e-05	1e-05	1e-05	1e-05	1e-05	1e-05	0	0	0	0	0	0	1	0	0	0	0	0	0	0	0	0
482	JI1772	P. sativum	0	0	0	0	1	0	0	0	0	0	0	0	1	0	cultivar	0.910708	0.0892824	1e-05	1e-05	0.84681	0.142488	0.010682	1e-05	0.859746	1e-05	1e-05	1e-05	1e-05	0.002933	1e-05	0.137271	0	0	0	0	0	0	1	0	0	0	0	0	0	0	0	0
483	JI1277	P. sativum	0	0	0	0	1	0	0	0	0	0	0	0	1	0	cultivar	0.896935	0.103055	1e-05	1e-05	0.846091	0.122116	0.031771	1.16667e-05	0.859522	1e-05	1e-05	1e-05	1e-05	0.026315	1e-05	0.114113	0	0	0	0	0	0	1	0	0	0	0	0	0	0	0	0
484	JI2016	P. sativum	0	0	0	0	1	0	0	0	0	0	0	0	0	1	other	0.99998	1e-05	1e-05	0.139752	0.860218	1e-05	1e-05	1e-05	0.858489	1e-05	1e-05	0.122036	0.019425	1e-05	1e-05	1e-05	0	0	0	0	0	0	1	0	0	0	0	0	0	0	0	0
485	JI2595	P. sativum	0	0	0	0	1	0	0	0	0	0	0	0	0	1	other	0.99998	1.02e-05	1e-05	0.107304	0.892666	1e-05	1e-05	1e-05	0.856714	0.119989	1e-05	0.023247	1e-05	1e-05	1e-05	1e-05	0	0	0	0	0	0	1	0	0	0	0	0	0	0	0	0
486	JI2228	P. sativum	0	0	0	0	1	0	0	0	0	0	0	0	0	1	other	0.99998	1e-05	1e-05	0.120942	0.879027	1e-05	1e-05	1.13333e-05	0.836997	0.023793	0.024428	0.114742	1e-05	1e-05	1e-05	1e-05	0	0	0	0	0	0	1	0	0	0	0	0	0	0	0	0
487	JI0745	P. sativum	0	0	0	0	1	0	0	0	0	0	0	0	0	1	other	0.999979	1.14e-05	1e-05	0.108986	0.890984	1.03333e-05	1e-05	1e-05	0.833895	0.166044	1e-05	1e-05	1e-05	1e-05	1e-05	1e-05	0	0	0	0	0	0	1	0	0	0	0	0	0	0	0	0
488	JI0560	P. sativum	0	0	0	0	1	0	0	0	0	0	0	0	1	0	cultivar	0.99998	1e-05	1e-05	0.144415	0.855555	1e-05	1e-05	1e-05	0.814851	0.163772	0.021328	1e-05	1e-05	1e-05	1e-05	1e-05	0	0	0	0	0	0	1	0	0	0	0	0	0	0	0	0
489	JI0434	P. sativum	0	0	0	0	1	0	0	0	0	0	0	0	1	0	cultivar	0.995307	0.004683	1e-05	0.0629763	0.896319	0.040685	1e-05	1e-05	0.806003	1e-05	0.193937	1e-05	1e-05	1e-05	1e-05	1e-05	0	0	0	0	0	0	1	0	0	0	0	0	0	0	0	0
490	JI2106	P. sativum	0	0	0	0	1	0	0	0	0	0	0	0	0	1	other	0.999979	1.1e-05	1e-05	0.175215	0.8243	0.000466	1e-05	1e-05	0.804291	0.099364	0.067833	0.021072	0.007409	1e-05	1e-05	1e-05	0	0	0	0	0	0	1	0	0	0	0	0	0	0	0	0
491	JI1762	P. sativum	0	0	0	0	1	0	0	0	0	0	0	0	0	1	other	0.99998	1.02e-05	1e-05	0.166477	0.833493	1e-05	1e-05	1e-05	0.803453	0.076977	0.073775	0.045748	1e-05	1e-05	1.7e-05	1e-05	0	0	0	0	0	0	1	0	0	0	0	0	0	0	0	0
492	JI0746	P. sativum	0	0	0	0	1	0	0	0	0	0	0	0	0	1	other	0.99998	1.04e-05	1e-05	0.134496	0.865474	1e-05	1e-05	1e-05	0.800922	0.199018	1e-05	1e-05	1e-05	1e-05	1e-05	1e-05	0	0	0	0	0	0	1	0	0	0	0	0	0	0	0	0
493	JI1294	P. sativum	0	0	0	0	1	0	0	0	0	0	0	0	1	0	cultivar	0.99998	1e-05	1e-05	0.171898	0.828072	1e-05	1e-05	1e-05	0.796919	0.100981	0.092853	1e-05	0.009207	1e-05	1e-05	1e-05	0	0	0	0	0	0	1	0	0	0	0	0	0	0	0	0
494	JI2500	P. sativum	0	0	0	0	1	0	0	0	0	0	0	0	1	0	cultivar	0.955607	0.0443828	1e-05	0.0580083	0.854918	0.0656637	0.0214003	1e-05	0.786903	1e-05	0.051396	0.088376	0.011893	0.017079	1e-05	0.044333	0	0	0	0	0	0	1	0	0	0	0	0	0	0	0	0
495	JI0930	P. sativum	0	0	0	0	1	0	0	0	0	0	0	0	1	0	cultivar	0.99998	1.02e-05	1e-05	0.191775	0.808194	1.06667e-05	1e-05	1e-05	0.783022	0.155653	0.049367	1e-05	0.011912	1e-05	1e-05	1.5e-05	0	0	0	0	0	0	1	0	0	0	0	0	0	0	0	0
496	JI0738	P. sativum	0	0	0	0	1	0	0	0	0	0	0	0	0	1	other	0.999979	1.08e-05	1e-05	0.156031	0.843939	1.03333e-05	1e-05	1e-05	0.778794	0.21814	0.003017	1e-05	1e-05	1e-05	1e-05	1e-05	0	0	0	0	0	0	1	0	0	0	0	0	0	0	0	0
497	JI0122	P. sativum	0	0	0	0	1	0	0	0	0	0	0	0	1	0	cultivar	0.99998	1e-05	1e-05	0.177287	0.822683	1e-05	1e-05	1.03333e-05	0.778154	0.207636	1e-05	0.014156	1e-05	1.1e-05	1e-05	1.2e-05	0	0	0	0	0	0	1	0	0	0	0	0	0	0	0	0
498	JI0145	P. sativum	0	0	0	0	1	0	0	0	0	0	0	0	0	1	other	0.999979	1.1e-05	1e-05	0.206796	0.793173	1e-05	1.1e-05	1e-05	0.769732	0.190077	1e-05	1e-05	0.040141	1e-05	1e-05	1e-05	0	0	0	0	0	0	1	0	0	0	0	0	0	0	0	0
499	JI0853	P. sativum	0	0	0	0	1	0	0	0	0	0	0	1	0	0	landrace	0.99998	1.02e-05	1e-05	0.187891	0.812079	1e-05	1e-05	1e-05	0.769355	0.04408	0.133829	0.052696	1e-05	1e-05	1e-05	1e-05	0	0	0	0	0	0	1	0	0	0	0	0	0	0	0	0
500	JI0354	P. sativum	0	0	0	0	1	0	0	0	0	0	0	0	1	0	cultivar	0.99998	1e-05	1e-05	0.187125	0.812845	1e-05	1e-05	1e-05	0.757269	0.242671	1e-05	1e-05	1e-05	1e-05	1e-05	1e-05	0	0	0	0	0	0	1	0	0	0	0	0	0	0	0	0
501	JI2374	P. sativum	0	0	0	0	1	0	0	0	0	0	0	0	1	0	cultivar	0.86356	0.131659	0.004781	1e-05	0.76652	0.209322	0.0241383	1e-05	0.752321	1e-05	0.053581	1e-05	1e-05	0.018986	1.6e-05	0.175066	0	0	0	0	0	0	1	0	0	0	0	0	0	0	0	0
502	JI2389	P. sativum	0	0	0	0	1	0	0	0	0	0	0	0	0	1	other	0.99998	1.04e-05	1e-05	0.215472	0.784498	1e-05	1e-05	1e-05	0.74303	0.121576	0.135344	1e-05	1e-05	1e-05	1e-05	1e-05	0	0	0	0	0	0	1	0	0	0	0	0	0	0	0	0
503	JI2403	P. sativum	0	0	0	0	1	0	0	0	0	0	0	0	1	0	cultivar	0.935273	0.064717	1e-05	0.0774667	0.784825	0.137688	1e-05	1e-05	0.732125	1e-05	0.138361	0.030813	0.006853	1e-05	1e-05	0.091818	0	0	0	0	0	0	1	0	0	0	0	0	0	0	0	0
504	JI0670	P. sativum	0	0	0	0	1	0	0	0	0	0	0	0	1	0	cultivar	0.99998	1.04e-05	1e-05	0.244079	0.755891	1e-05	1e-05	1e-05	0.72472	0.167847	0.057372	0.050021	1e-05	1e-05	1e-05	1e-05	0	0	0	0	0	0	1	0	0	0	0	0	0	0	0	0
505	JI0061	P. sativum	0	0	0	0	1	0	0	0	0	0	0	0	0	1	other	0.99998	1e-05	1e-05	0.245184	0.754781	1.13333e-05	1.33333e-05	1e-05	0.723807	0.268551	1e-05	1e-05	0.007592	1e-05	1e-05	1e-05	0	0	0	0	0	0	1	0	0	0	0	0	0	0	0	0
506	JI0411	P. sativum	0	0	0	0	1	0	0	0	0	0	0	0	1	0	cultivar	0.999978	1.18e-05	1e-05	0.243382	0.756588	1.03333e-05	1e-05	1e-05	0.720723	0.184172	0.077915	1e-05	0.01715	1e-05	1e-05	1e-05	0	0	0	0	0	0	1	0	0	0	0	0	0	0	0	0
507	JI0362	P. sativum	0	0	0	0	1	0	0	0	0	0	0	0	0	1	other	0.99998	1.04e-05	1e-05	0.218559	0.781411	1e-05	1e-05	1e-05	0.720706	0.170933	0.108309	1e-05	1e-05	1e-05	1e-05	1.2e-05	0	0	0	0	0	0	1	0	0	0	0	0	0	0	0	0
508	JI0907	P. sativum	0	0	0	0	1	0	0	0	0	0	0	0	0	1	other	0.755524	0.244466	1e-05	1e-05	0.736465	1.2e-05	0.263502	1.06667e-05	0.718023	1e-05	1e-05	0.020907	1e-05	0.26102	1e-05	1e-05	0	0	0	0	0	0	1	0	0	0	0	0	0	0	0	0
509	JI0358	P. sativum	0	0	0	0	1	0	0	0	0	0	0	0	1	0	cultivar	0.99998	1e-05	1e-05	0.247859	0.752108	1e-05	1e-05	1.3e-05	0.717708	0.151064	0.131177	1e-05	1e-05	1e-05	1e-05	1.1e-05	0	0	0	0	0	0	1	0	0	0	0	0	0	0	0	0
510	JI0757	P. sativum	0	0	0	0	1	0	0	0	0	0	0	0	1	0	cultivar	0.99998	1e-05	1e-05	0.232228	0.767742	1e-05	1.03333e-05	1e-05	0.716649	0.264854	1e-05	0.018448	1e-05	1e-05	1e-05	1e-05	0	0	0	0	0	0	1	0	0	0	0	0	0	0	0	0
511	JI0574	P. sativum	0	0	0	0	1	0	0	0	0	0	0	0	1	0	cultivar	0.941727	0.058263	1e-05	0.152353	0.738728	0.0976687	0.0112397	1e-05	0.710528	0.096831	0.089244	1e-05	0.019052	0.005534	1e-05	0.078791	0	0	0	0	0	0	1	0	0	0	0	0	0	0	0	0
512	JI1272	P. sativum	0	0	0	0	1	0	0	0	0	0	0	0	1	0	cultivar	0.999979	1.06e-05	1e-05	0.250768	0.743238	0.00597333	1e-05	1e-05	0.702436	0.078821	0.213296	0.005407	1e-05	1e-05	1e-05	1e-05	0	0	0	0	0	0	1	0	0	0	0	0	0	0	0	0
513	JI1732	P. sativum	0	0	0	0	1	0	0	0	0	0	0	0	0	1	other	0.96321	0.0367802	1e-05	0.141708	0.747387	0.110884	1e-05	1e-05	0.700912	0.094416	0.034706	0.090916	1e-05	1e-05	1e-05	0.07902	0	0	0	0	0	0	1	0	0	0	0	0	0	0	0	0
514	JI0035	P. sativum	0	0	0	0	1	0	0	0	0	0	0	0	0	1	other	0.99998	1e-05	1e-05	0.309495	0.690475	1e-05	1e-05	1e-05	0.695432	0.125202	1e-05	0.179316	1e-05	1e-05	1e-05	1e-05	0	0	0	0	0	0	1	0	0	0	0	0	0	0	0	0
515	JI2659	P. sativum	0	0	0	0	1	0	0	0	0	0	0	0	1	0	cultivar	0.987615	0.012375	1e-05	0.248312	0.738124	1e-05	0.0135447	1e-05	0.69392	1e-05	0.301778	1e-05	1e-05	0.004252	1.1e-05	1e-05	0	0	0	0	0	0	1	0	0	0	0	0	0	0	0	0
516	JI0854	P. sativum	0	0	0	0	1	0	0	0	0	0	0	0	0	1	other	0.99998	1e-05	1e-05	0.25212	0.74785	1e-05	1e-05	1e-05	0.693719	0.028979	0.102764	0.174498	1e-05	1e-05	1e-05	1e-05	0	0	0	0	0	0	1	0	0	0	0	0	0	0	0	0
517	JI2174	P. sativum	0	0	0	0	1	0	0	0	0	0	0	0	0	1	other	0.999979	1.12e-05	1e-05	0.252808	0.747162	1e-05	1e-05	1e-05	0.692617	0.029379	0.103191	0.174765	1e-05	1.8e-05	1e-05	1e-05	0	0	0	0	0	0	1	0	0	0	0	0	0	0	0	0
518	JI2182	P. sativum	0	0	0	0	1	0	0	0	0	0	0	0	0	1	other	0.999979	1.08e-05	1e-05	0.292628	0.707342	1e-05	1e-05	1e-05	0.691375	0.127507	1e-05	0.181068	1e-05	1e-05	1e-05	1e-05	0	0	0	0	0	0	1	0	0	0	0	0	0	0	0	0
519	JI1733	P. sativum	0	0	0	0	1	0	0	0	0	0	0	0	1	0	cultivar	0.959802	0.0401876	1e-05	0.147444	0.73472	0.117815	1e-05	1.03333e-05	0.690139	0.08091	0.047481	0.094285	0.004015	1e-05	1e-05	0.08315	0	0	0	0	0	0	1	0	0	0	0	0	0	0	0	0
520	JI2402	P. sativum	0	0	0	0	1	0	0	0	0	0	0	0	1	0	cultivar	0.995667	0.0043226	1e-05	0.25832	0.716529	0.0251283	1.23333e-05	1e-05	0.678183	0.131324	0.116808	0.052594	0.017236	1e-05	1e-05	0.003834	0	0	0	0	0	0	1	0	0	0	0	0	0	0	0	0
521	JI0546	P. sativum	0	0	0	0	1	0	0	0	0	0	0	0	1	0	cultivar	0.999978	1.16e-05	1e-05	0.281047	0.707226	0.011707	1e-05	1e-05	0.665848	0.092943	0.241159	1e-05	1e-05	1.1e-05	1e-05	1e-05	0	0	0	0	0	0	1	0	0	0	0	0	0	0	0	0
522	JI2114	P. sativum	0	0	0	0	1	0	0	0	0	0	0	0	0	1	other	0.977787	0.0222032	1e-05	0.319986	0.657847	0.0176357	0.004522	1e-05	0.65277	1e-05	0.175536	0.006095	0.165558	1e-05	1e-05	1e-05	0	0	0	0	0	0	1	0	0	0	0	0	0	0	0	0
523	JI2036	P. sativum	0	0	0	0	1	0	0	0	0	0	0	0	1	0	cultivar	0.99998	1e-05	1e-05	0.243623	0.756344	1.3e-05	1e-05	1e-05	0.650496	1e-05	0.349444	1e-05	1e-05	1e-05	1e-05	1e-05	0	0	0	0	0	0	1	0	0	0	0	0	0	0	0	0
524	JI2007	P. sativum	0	0	0	0	1	0	0	0	0	0	0	0	1	0	cultivar	0.892701	0.107289	1e-05	0.110854	0.69762	0.176692	0.0148233	1e-05	0.642888	0.104921	0.09021	0.015173	1e-05	0.012387	1e-05	0.1344	0	0	0	0	0	0	1	0	0	0	0	0	0	0	0	0
525	JI0057	P. sativum	0	0	0	0	1	0	0	0	0	0	0	0	0	1	other	0.999978	1.16e-05	1e-05	0.380627	0.619342	1.1e-05	1e-05	1e-05	0.639574	0.027287	0.147352	0.185747	1e-05	1e-05	1e-05	1e-05	0	0	0	0	0	0	1	0	0	0	0	0	0	0	0	0
526	JI1816	P. sativum	0	0	0	0	1	0	0	0	0	0	0	0	0	1	other	0.99998	1.04e-05	1e-05	0.311837	0.688133	1e-05	1e-05	1e-05	0.638301	0.009977	0.329797	0.021886	1e-05	1e-05	1e-05	1e-05	0	0	0	0	0	0	1	0	0	0	0	0	0	0	0	0
527	JI1817	P. sativum	0	0	0	0	1	0	0	0	0	0	0	0	0	1	other	0.99998	1.04e-05	1e-05	0.226116	0.773181	0.000682333	1e-05	1e-05	0.636845	1e-05	0.363092	1e-05	1e-05	1.2e-05	1e-05	1e-05	0	0	0	0	0	0	1	0	0	0	0	0	0	0	0	0
528	JI2410	P. sativum	0	0	0	0	1	0	0	0	0	0	0	0	1	0	cultivar	0.993925	0.0060646	1e-05	0.304027	0.662269	0.0336843	1e-05	1e-05	0.630722	0.2479	0.10503	0.016309	1e-05	1e-05	1e-05	1e-05	0	0	0	0	0	0	1	0	0	0	0	0	0	0	0	0
529	JI0033	P. sativum	0	0	0	0	1	0	0	0	0	0	0	0	0	1	other	0.999979	1.08e-05	1e-05	0.332876	0.667094	1e-05	1e-05	1e-05	0.629402	0.335249	1e-05	0.035299	1e-05	1e-05	1e-05	1e-05	0	0	0	0	0	0	1	0	0	0	0	0	0	0	0	0
530	JI1774	P. sativum	0	0	0	0	1	0	0	0	0	0	0	0	0	1	other	0.99998	1e-05	1e-05	0.303885	0.696085	1e-05	1e-05	1e-05	0.627509	0.209004	0.120082	0.043361	1e-05	1e-05	1e-05	1.5e-05	0	0	0	0	0	0	1	0	0	0	0	0	0	0	0	0
531	JI0341	P. sativum	0	0	0	0	1	0	0	0	0	0	0	0	1	0	cultivar	0.99998	1.02e-05	1e-05	0.326073	0.673897	1e-05	1e-05	1e-05	0.624935	0.259174	0.096805	0.019044	1e-05	1e-05	1e-05	1.4e-05	0	0	0	0	0	0	1	0	0	0	0	0	0	0	0	0
532	JI1219	P. sativum	0	0	0	0	1	0	0	0	0	0	0	0	0	1	other	0.999979	1.08e-05	1e-05	0.341898	0.64146	0.0166223	1e-05	1e-05	0.624275	0.006051	0.369624	1e-05	1e-05	1e-05	1e-05	1e-05	0	0	0	0	0	0	1	0	0	0	0	0	0	0	0	0
533	JI3053	P. sativum	0	0	0	0	1	0	0	0	0	0	0	0	1	0	cultivar	0.905906	0.0940842	1e-05	0.122437	0.677453	0.200089	1e-05	1e-05	0.616891	0.016502	0.102705	0.122721	1e-05	1.1e-05	1e-05	0.141151	0	0	0	0	0	0	1	0	0	0	0	0	0	0	0	0
534	JI0356	P. sativum	0	0	0	0	1	0	0	0	0	0	0	0	1	0	cultivar	0.99998	1e-05	1e-05	0.367251	0.632719	1e-05	1e-05	1e-05	0.610801	0.234988	0.04552	0.086391	0.022269	1e-05	1e-05	1e-05	0	0	0	0	0	0	1	0	0	0	0	0	0	0	0	0
535	JI0090	P. sativum	0	0	0	0	1	0	0	0	0	0	0	1	0	0	landrace	0.980725	0.0192648	1e-05	0.333736	0.642138	0.010104	0.0140113	1e-05	0.606182	0.274529	0.06353	0.041064	1e-05	0.014664	1e-05	1e-05	0	0	0	0	0	0	1	0	0	0	0	0	0	0	0	0
536	JI2757	P. sativum	0	0	0	0	1	0	0	0	0	0	0	0	0	1	other	0.997147	0.002843	1e-05	0.387961	0.594465	0.0175537	1e-05	1e-05	0.604288	1e-05	0.263075	0.08244	0.050158	1e-05	1e-05	1e-05	0	0	0	0	0	0	1	0	0	0	0	0	0	0	0	0
537	JI3134	P. sativum	0	0	0	0	1	0	0	0	0	0	0	0	1	0	cultivar	0.942979	0.0570108	1e-05	0.145101	0.723336	0.131543	1e-05	1e-05	0.599023	1e-05	0.236179	0.08902	1e-05	1e-05	1e-05	0.075737	0	0	0	0	0	0	1	0	0	0	0	0	0	0	0	0
538	JI2296	P. sativum	0	0	0	0	1	0	0	0	0	0	0	0	1	0	cultivar	0.99998	1e-05	1e-05	0.274187	0.725783	1e-05	1e-05	1e-05	0.594401	1e-05	0.362518	0.043031	1e-05	1e-05	1e-05	1e-05	0	0	0	0	0	0	1	0	0	0	0	0	0	0	0	0
539	JI0136	P. sativum	0	0	0	0	1	0	0	0	0	0	0	0	0	1	other	0.891441	0.108549	1e-05	0.180276	0.699672	1e-05	0.120033	1e-05	0.59412	1e-05	1e-05	0.331354	1e-05	0.074476	1e-05	1e-05	0	0	0	0	0	0	1	0	0	0	0	0	0	0	0	0
540	JI1822	P. sativum	0	0	0	0	1	0	0	0	0	0	0	0	1	0	cultivar	0.999979	1.06e-05	1e-05	0.329729	0.668191	0.00205967	1e-05	1e-05	0.589042	0.369101	0.041802	1.3e-05	1e-05	1e-05	1.1e-05	1.1e-05	0	0	0	0	0	0	1	0	0	0	0	0	0	0	0	0
541	JI2401	P. sativum	0	0	0	0	1	0	0	0	0	0	0	0	1	0	cultivar	0.848933	0.148229	0.002838	0.118564	0.625214	0.235735	0.020477	1e-05	0.588551	0.086561	0.115015	0.009661	1e-05	0.015714	1e-05	0.184477	0	0	0	0	0	0	1	0	0	0	0	0	0	0	0	0
542	JI1768	P. sativum	0	0	0	0	1	0	0	0	0	0	0	0	1	0	cultivar	0.99998	1.04e-05	1e-05	0.24735	0.752619	1.16667e-05	1e-05	1e-05	0.587293	1e-05	0.352154	0.060503	1e-05	1e-05	1e-05	1e-05	0	0	0	0	0	0	1	0	0	0	0	0	0	0	0	0
543	JI0342	P. sativum	0	0	0	0	1	0	0	0	0	0	0	0	1	0	cultivar	0.86242	0.13064	0.0069408	0.110739	0.63249	0.256751	1e-05	1e-05	0.583498	0.207225	0.001391	1e-05	1e-05	1e-05	1e-05	0.207846	0	0	0	0	0	0	1	0	0	0	0	0	0	0	0	0
544	JI1187	P. sativum	0	0	0	0	1	0	0	0	0	0	0	0	1	0	cultivar	0.999979	1.14e-05	1e-05	0.273339	0.706096	0.020545	1e-05	1e-05	0.581353	1e-05	0.418587	1e-05	1e-05	1e-05	1e-05	1e-05	0	0	0	0	0	0	1	0	0	0	0	0	0	0	0	0
545	JI0147	P. sativum	0	0	0	0	1	0	0	0	0	0	0	0	0	1	other	0.635705	0.364285	1e-05	0.035302	0.579833	1.1e-05	0.384844	1e-05	0.576269	0.013516	1e-05	0.031149	1e-05	0.379026	1e-05	1e-05	0	0	0	0	0	0	1	0	0	0	0	0	0	0	0	0
546	JI0084	P. sativum	0	0	0	0	1	0	0	0	0	0	0	1	0	0	landrace	0.83027	0.16972	1e-05	0.242807	0.579968	1e-05	0.177205	1e-05	0.575637	0.109651	0.0217	0.09731	0.022215	0.173467	1e-05	1e-05	0	0	0	0	0	0	1	0	0	0	0	0	0	0	0	0
547	JI1179	P. sativum	0	0	0	0	1	0	0	0	0	0	0	0	0	1	other	0.603453	0.396537	1e-05	1.06667e-05	0.582213	1e-05	0.417756	1e-05	0.573627	1e-05	1e-05	1e-05	0.022191	0.404132	1e-05	1e-05	0	0	0	0	0	0	1	0	0	0	0	0	0	0	0	0
548	JI1800	P. sativum	0	0	0	0	1	0	0	0	0	0	0	0	0	1	other	0.999978	1.16e-05	1e-05	0.322731	0.655768	0.021482	1e-05	1e-05	0.573008	0.032827	0.336114	0.058011	1e-05	1e-05	1e-05	1e-05	0	0	0	0	0	0	1	0	0	0	0	0	0	0	0	0
549	JI3614	P. sativum	0	0	0	0	1	0	0	0	0	0	0	0	1	0	cultivar	0.999979	1.08e-05	1e-05	0.316403	0.682953	0.000623667	1e-05	1e-05	0.567554	0.161341	0.190815	0.080235	1e-05	1.8e-05	1.7e-05	1e-05	0	0	0	0	0	0	1	0	0	0	0	0	0	0	0	0
550	JI1575	P. sativum	0	0	0	0	1	0	0	0	0	0	0	1	0	0	landrace	0.832422	0.167568	1e-05	0.183168	0.635772	1e-05	0.181041	1e-05	0.567433	0.250863	1e-05	1e-05	0.007765	0.173899	1e-05	1e-05	0	0	0	0	0	0	1	0	0	0	0	0	0	0	0	0
551	JI0804	P. sativum	0	0	0	0	1	0	0	0	0	1	0	0	0	0	other wild	0.572106	0.427884	1e-05	1e-05	0.554412	1e-05	0.445558	1e-05	0.559626	1e-05	1e-05	1e-05	1e-05	0.440314	1e-05	1e-05	0	0	0	0	0	0	1	0	0	0	0	0	0	0	0	0
552	JI2324	P. sativum	0	0	0	0	1	0	0	0	0	0	0	0	1	0	cultivar	0.99998	1.04e-05	1e-05	0.305667	0.694303	1e-05	1e-05	1e-05	0.550365	1e-05	0.449575	1e-05	1e-05	1e-05	1e-05	1e-05	0	0	0	0	0	0	1	0	0	0	0	0	0	0	0	0
553	JI2782	P. sativum	0	0	0	0	1	0	0	0	0	0	0	0	0	1	other	0.99998	1e-05	1e-05	0.374803	0.625167	1e-05	1e-05	1e-05	0.54652	1e-05	1e-05	0.45342	1e-05	1e-05	1e-05	1e-05	0	0	0	0	0	0	1	0	0	0	0	0	0	0	0	0
554	JI1212	P. sativum	0	0	0	0	1	0	0	0	0	0	0	0	1	0	cultivar	0.818131	0.181859	1e-05	0.0243573	0.626835	0.348787	1e-05	1e-05	0.546327	0.07134	0.076166	0.04338	1e-05	1e-05	1.5e-05	0.262752	0	0	0	0	0	0	1	0	0	0	0	0	0	0	0	0
555	JI3610	P. sativum	0	0	0	0	1	0	0	0	0	0	0	0	1	0	cultivar	0.99998	1e-05	1e-05	0.29168	0.70829	1e-05	1e-05	1e-05	0.543412	1e-05	0.456519	1e-05	1e-05	1e-05	1.4e-05	1.5e-05	0	0	0	0	0	0	1	0	0	0	0	0	0	0	0	0
556	JI1217	P. sativum	0	0	0	0	1	0	0	0	0	0	0	0	0	1	other	0.99998	1e-05	1e-05	0.474562	0.525408	1e-05	1e-05	1e-05	0.542712	0.109326	0.329557	1e-05	0.018365	1e-05	1e-05	1e-05	0	0	0	0	0	0	1	0	0	0	0	0	0	0	0	0
557	JI0819	P. sativum	0	0	0	0	1	0	0	0	0	0	0	0	0	1	other	0.99998	1e-05	1e-05	0.409149	0.59082	1e-05	1e-05	1.16667e-05	0.542014	0.27154	1e-05	0.186396	1e-05	1e-05	1e-05	1e-05	0	0	0	0	0	0	1	0	0	0	0	0	0	0	0	0
558	JI2671	P. sativum	0	0	0	0	1	0	0	0	0	0	0	0	0	1	other	0.99998	1.04e-05	1e-05	0.413494	0.586476	1e-05	1.03333e-05	1e-05	0.536525	0.085167	0.189149	0.189118	1e-05	1e-05	1e-05	1e-05	0	0	0	0	0	0	1	0	0	0	0	0	0	0	0	0
559	JI0423	P. sativum	0	0	0	0	1	0	0	0	0	0	0	0	1	0	cultivar	0.999979	1.14e-05	1e-05	0.230909	0.769061	1e-05	1e-05	1e-05	0.534642	1e-05	0.46529	1.8e-05	1e-05	1e-05	1e-05	1e-05	0	0	0	0	0	0	1	0	0	0	0	0	0	0	0	0
560	JI2321	P. sativum	0	0	0	0	1	0	0	0	0	0	0	0	1	0	cultivar	0.99998	1.04e-05	1e-05	0.248581	0.751387	1.26667e-05	1e-05	1e-05	0.534638	1e-05	0.465302	1e-05	1e-05	1e-05	1e-05	1e-05	0	0	0	0	0	0	1	0	0	0	0	0	0	0	0	0
561	JI0043	P. sativum	0	0	0	0	1	0	0	0	0	0	0	0	0	1	other	0.829606	0.170384	1e-05	0.266325	0.560738	1e-05	0.172917	1e-05	0.532042	0.136931	0.11363	0.048951	1e-05	0.168416	1e-05	1e-05	0	0	0	0	0	0	1	0	0	0	0	0	0	0	0	0
562	JI3609	P. sativum	0	0	0	0	1	0	0	0	0	0	0	0	1	0	cultivar	0.99998	1e-05	1e-05	0.280812	0.719158	1e-05	1e-05	1e-05	0.522043	1e-05	0.320137	0.157764	1.6e-05	1e-05	1e-05	1e-05	0	0	0	0	0	0	1	0	0	0	0	0	0	0	0	0
563	JI2084	P. sativum	0	0	0	0	1	0	0	0	0	0	0	0	0	1	other	0.773241	0.218057	0.0087022	0.0947977	0.563839	0.274175	0.067179	1e-05	0.512922	0.059284	0.049752	0.099314	1e-05	0.054081	1e-05	0.224627	0	0	0	0	0	0	1	0	0	0	0	0	0	0	0	0
564	JI1245	P. sativum	0	0	0	0	1	0	0	0	0	0	0	0	1	0	cultivar	0.99998	1e-05	1e-05	0.369384	0.630584	1e-05	1e-05	1.23333e-05	0.511018	0.488922	1e-05	1e-05	1e-05	1e-05	1e-05	1e-05	0	0	0	0	0	0	1	0	0	0	0	0	0	0	0	0
565
566
567
568	JI1846	P. sativum	0	0	0	0	1	0	0	0	0	1	0	0	0	0	other wild	0.669921	0.325301	0.004779	0.391116	0.0478983	0.560966	1e-05	1e-05	1.1e-05	0.08263	0.524539	0.046635	1e-05	1e-05	1e-05	0.346155	0	0	0	0	0	0	0	0	0	1	0	0	0	0	0	0
569	JI1086	P. sativum	0	0	0	0	1	0	0	0	0	0	0	1	0	0	landrace	0.539247	0.434889	0.0258636	0.271672	0.0121863	0.716121	1e-05	1e-05	1e-05	0.306765	1e-05	0.042568	1e-05	1e-05	1e-05	0.650617	0	0	0	0	0	0	0	0	0	1	0	0	0	0	0	0
570	JI1699	P. sativum	0	0	0	0	1	0	0	0	0	0	0	0	1	0	cultivar	0.552481	0.447509	1e-05	0.094058	0.148864	0.757058	1e-05	1e-05	0.11114	0.062517	0.230692	1e-05	1e-05	1e-05	1e-05	0.595611	0	0	0	0	0	0	0	0	0	1	0	0	0	0	0	0
571	JI2423	P. sativum	0	0	0	0	1	0	0	0	0	0	0	1	0	0	landrace	0.574869	0.425121	1e-05	0.172223	0.065799	0.761959	1e-05	1e-05	1e-05	0.099764	0.358755	1e-05	1e-05	1e-05	1e-05	0.541431	0	0	0	0	0	0	0	0	0	1	0	0	0	0	0	0
572	JI0711	P. sativum	0	0	0	0	1	0	0	0	0	0	0	0	1	0	cultivar	0.575471	0.424519	1e-05	0.186104	0.0645327	0.749344	1e-05	1e-05	1.1e-05	0.105404	0.362323	1e-05	1e-05	1e-05	1e-05	0.532222	0	0	0	0	0	0	0	0	0	1	0	0	0	0	0	0
573	JI0807	P. sativum	0	0	0	0	1	0	0	0	0	0	0	1	0	0	landrace	0.589841	0.410149	1e-05	0.198621	0.0734393	0.72792	1e-05	1e-05	0.010168	0.092028	0.362717	0.021305	1e-05	1e-05	1e-05	0.513752	0	0	0	0	0	0	0	0	0	1	0	0	0	0	0	0
574	JI0191	P. sativum	0	0	0	0	1	0	0	0	0	0	0	1	0	0	landrace	0.625462	0.374528	1e-05	0.166203	0.21411	0.619665	1e-05	1.2e-05	0.176805	0.027651	0.296927	1e-05	1e-05	1e-05	1e-05	0.498577	0	0	0	0	0	0	0	0	0	1	0	0	0	0	0	0
575	JI0267	P. sativum	0	0	0	0	1	0	0	0	0	0	0	1	0	0	landrace	0.593748	0.406242	1e-05	0.258551	0.036188	0.705241	1e-05	1e-05	1e-05	0.125061	0.369511	0.010417	1e-05	1e-05	1e-05	0.494971	0	0	0	0	0	0	0	0	0	1	0	0	0	0	0	0
576	JI0846	P. sativum	0	0	0	0	1	0	0	0	0	0	0	0	0	1	other	0.594537	0.405453	1e-05	0.230745	0.0562753	0.71296	1e-05	1e-05	1e-05	0.107958	0.397496	1e-05	1e-05	1e-05	1e-05	0.494496	0	0	0	0	0	0	0	0	0	1	0	0	0	0	0	0
577	JI3025	P. sativum	0	0	0	0	1	0	0	0	0	0	0	0	0	1	other	0.521875	0.386871	0.091254	0.0294633	0.256413	0.525842	0.138952	0.049329	0.234683	1e-05	0.098155	1e-05	0.036821	0.116725	0.023265	0.490331	0	0	0	0	0	0	0	0	0	1	0	0	0	0	0	0
578	JI3049	P. sativum	0	0	0	0	1	0	0	0	0	0	0	0	0	1	other	0.548745	0.38144	0.0698158	0.036533	0.2796	0.514869	0.140624	0.028375	0.253464	0.000996	0.095052	1e-05	0.047728	0.115235	1e-05	0.487505	0	0	0	0	0	0	0	0	0	1	0	0	0	0	0	0
579	JI2611	P. sativum	0	0	0	0	1	0	0	0	0	0	0	0	0	1	other	0.537519	0.423318	0.039162	0.275954	0.00804733	0.62925	0.086738	1e-05	1e-05	0.041989	0.41461	0.016277	1e-05	0.078354	1e-05	0.44874	0	0	0	0	0	0	0	0	0	1	0	0	0	0	0	0
580	JI1444	P. sativum	0	0	0	0	1	0	0	0	0	0	0	1	0	0	landrace	0.545119	0.413972	0.040908	0.308589	1e-05	0.608961	0.0824293	1e-05	1e-05	0.041992	0.420526	0.027458	1e-05	0.076017	1e-05	0.433977	0	0	0	0	0	0	0	0	0	1	0	0	0	0	0	0
581	JI0295	P. sativum	0	0	0	0	1	0	0	0	0	0	0	1	0	0	landrace	0.670537	0.329453	1e-05	0.213572	0.201429	0.584979	1e-05	1e-05	0.119437	0.091021	0.353331	0.030908	1e-05	1e-05	1e-05	0.405272	0	0	0	0	0	0	0	0	0	1	0	0	0	0	0	0
582	JI1705	P. sativum ssp jomardii	0	0	0	0	0	1	0	0	0	1	0	0	0	0	other wild	0.661059	0.338931	1e-05	0.253375	0.173305	0.5733	1e-05	1e-05	0.109811	0.09776	0.320301	0.072534	1e-05	1e-05	1e-05	0.399564	0	0	0	0	0	0	0	0	0	1	0	0	0	0	0	0
583	JI0245	P. sativum	0	0	0	0	1	0	0	0	0	0	0	1	0	0	landrace	0.677158	0.322832	1e-05	0.219319	0.206315	0.574346	1e-05	1e-05	0.125102	0.102106	0.352193	0.024175	1e-05	1e-05	1e-05	0.396394	0	0	0	0	0	0	0	0	0	1	0	0	0	0	0	0
584	JI3096	P. sativum	0	0	0	0	1	0	0	0	0	0	0	0	0	1	other	0.551933	0.424187	0.02388	0.27364	0.0583593	0.575522	0.0924683	1e-05	0.003229	0.067402	0.450689	1e-05	1e-05	0.082969	1e-05	0.395681	0	0	0	0	0	0	0	0	0	1	0	0	0	0	0	0
585	JI1035	P. sativum	0	0	0	0	1	0	0	0	0	0	0	1	0	0	landrace	0.585829	0.377649	0.036522	0.353106	1e-05	0.585187	0.061687	1e-05	1e-05	0.073616	0.454235	0.019705	1e-05	0.058045	1e-05	0.394368	0	0	0	0	0	0	0	0	0	1	0	0	0	0	0	0
586
587
588
589	JI2344	P. sativum	0	0	0	0	1	0	0	0	0	0	0	0	1	0	cultivar	0.589617	0.410373	1e-05	0.495573	0.111504	1e-05	0.392903	1e-05	0.004865	0.608798	1e-05	1e-05	1e-05	0.386287	1e-05	1e-05	0	0	0	0	0	0	0	0	0	0	1	0	0	0	0	0
590	JI1804	P. sativum	0	0	0	0	1	0	0	0	0	0	0	0	1	0	cultivar	0.917787	0.0778406	0.0043728	0.368772	0.468873	0.162335	1e-05	1e-05	0.331033	1e-05	0.555191	0.063281	1e-05	1e-05	1e-05	0.050456	0	0	0	0	0	0	0	0	0	0	1	0	0	0	0	0
591	JI0184	P. sativum	0	0	0	0	1	0	0	0	0	0	0	0	1	0	cultivar	0.743056	0.256934	1e-05	0.304135	0.27131	0.424534	1e-05	1e-05	0.185415	0.04168	0.47679	1e-05	1e-05	1e-05	1e-05	0.296075	0	0	0	0	0	0	0	0	0	0	1	0	0	0	0	0
592	JI3271	P. elatius	0	1	0	0	0	0	0	0	1	0	0	0	0	0	P. elatius	0.622478	0.0880986	0.289423	0.448417	0.111293	0.170921	0.00146867	0.2679	0.087221	0.068217	0.461106	0.038826	0.011767	0.004351	0.266932	0.06158	0	0	0	0	0	0	0	0	0	0	1	0	0	0	0	0
593	JI1702	P. sativum	0	0	0	0	1	0	0	0	0	0	0	0	1	0	cultivar	0.509956	0.490034	1e-05	0.37083	0.0656833	0.225676	0.337801	1e-05	1e-05	0.092831	0.382345	0.122755	1e-05	0.326877	1e-05	0.075163	0	0	0	0	0	0	0	0	0	0	1	0	0	0	0	0
594	JI2559	P. sativum	0	0	0	0	1	0	0	0	0	0	0	0	0	1	other	0.669077	0.30282	0.028103	0.433088	0.051264	0.481126	0.0345123	1e-05	1e-05	0.285282	0.359741	1.2e-05	1e-05	0.034016	1e-05	0.320919	0	0	0	0	0	0	0	0	0	0	1	0	0	0	0	0
595	JI1848	P. sativum	0	0	0	0	1	0	0	0	0	0	0	0	1	0	cultivar	0.915249	0.0847414	1e-05	0.47158	0.432101	0.0416713	0.054638	1e-05	0.351311	0.271099	0.324324	1e-05	1e-05	0.053226	1e-05	1e-05	0	0	0	0	0	0	0	0	0	0	1	0	0	0	0	0
596	JI1850	P. sativum	0	0	0	0	1	0	0	0	0	0	0	0	1	0	cultivar	0.780305	0.219685	1e-05	0.16436	0.445858	0.389762	1e-05	1e-05	0.377869	0.104718	0.24182	1e-05	1e-05	1e-05	1e-05	0.275553	0	0	0	0	0	0	0	0	0	0	1	0	0	0	0	0
597	JI1246	P. sativum	0	0	0	0	1	0	0	0	0	0	0	0	0	1	other	0.929219	0.070771	1e-05	0.462259	0.491022	1e-05	0.0467	1e-05	0.488885	1e-05	0.162325	0.018347	0.321383	0.00903	1e-05	1e-05	0	0	0	0	0	0	0	0	0	0	1	0	0	0	0	0
598	JI0209	P. sativum	0	0	0	0	1	0	0	0	0	0	0	1	0	0	landrace	0.611748	0.305638	0.082615	0.476515	0.0770403	0.241292	0.132406	0.072747	0.029091	0.174575	0.157972	1e-05	0.272622	0.086288	0.066557	0.212884	0	0	0	0	0	0	0	0	0	0	1	0	0	0	0	0
599	JI0079	P. sativum	0	0	0	0	1	0	0	0	0	0	0	1	0	0	landrace	0.547743	0.452247	1e-05	0.411271	0.157057	1e-05	0.431651	1e-05	0.112367	0.323978	0.135754	0.00567	1e-05	0.4222	1e-05	1e-05	0	0	0	0	0	0	0	0	0	0	1	0	0	0	0	0
600	JI0808	P. sativum	0	0	0	0	1	0	0	0	0	0	0	0	1	0	cultivar	0.79932	0.20067	1e-05	0.459762	0.211474	0.328744	1e-05	1e-05	0.151288	1e-05	0.116854	0.487702	1e-05	1e-05	1e-05	0.244117	0	0	0	0	0	0	0	0	0	0	1	0	0	0	0	0
601	JI1980	P. sativum	0	0	0	0	1	0	0	0	0	0	0	1	0	0	landrace	0.733512	0.266478	1e-05	0.262107	0.468804	1e-05	0.269069	1e-05	0.428202	0.22275	0.088894	1e-05	1e-05	0.260108	1.7e-05	1e-05	0	0	0	0	0	0	0	0	0	0	1	0	0	0	0	0
602	JI0089	P. sativum	0	0	0	0	1	0	0	0	0	0	0	1	0	0	landrace	0.922545	0.0774452	1e-05	0.454295	0.477061	1e-05	0.068624	1e-05	0.472725	0.14373	0.015717	0.044701	0.277624	0.045483	1e-05	1e-05	0	0	0	0	0	0	0	0	0	0	1	0	0	0	0	0
603	JI2348	P. sativum	0	0	0	0	1	0	0	0	0	0	0	1	0	0	landrace	0.670829	0.329161	1e-05	0.488844	0.195286	1e-05	0.31585	1e-05	0.119659	0.499128	1e-05	0.069674	1e-05	0.311498	1e-05	1e-05	0	0	0	0	0	0	0	0	0	0	1	0	0	0	0	0
604	JI2083	P. sativum	0	0	0	0	1	0	0	0	0	0	0	0	0	1	other	0.677598	0.322392	1e-05	0.306677	0.208756	0.484547	1e-05	1e-05	0.225415	0.107636	1e-05	0.232044	1e-05	1e-05	1e-05	0.434865	0	0	0	0	0	0	0	0	0	0	1	0	0	0	0	0
605
606
607
608	JI1854	P. humile	0	0	0	1	0	0	0	0	0	1	0	0	0	0	other wild	1e-05	0.99998	1e-05	1e-05	1e-05	1e-05	0.99996	1e-05	1e-05	1e-05	1e-05	1e-05	1e-05	0.99993	1e-05	1e-05	0	0	0	0	0	0	0	0	0	0	0	0	1	0	0	0
609	JI2018	P. sativum	0	0	0	0	1	0	0	0	0	0	0	1	0	0	landrace	1e-05	0.99998	1e-05	1e-05	1e-05	1e-05	0.99996	1e-05	1e-05	1e-05	1e-05	1e-05	1e-05	0.99993	1e-05	1e-05	0	0	0	0	0	0	0	0	0	0	0	0	1	0	0	0
610	JI0087	P. sativum	0	0	0	0	1	0	0	0	0	0	0	1	0	0	landrace	1.08e-05	0.999979	1e-05	1e-05	1e-05	1e-05	0.99996	1e-05	1e-05	1e-05	1e-05	1e-05	1e-05	0.99993	1e-05	1e-05	0	0	0	0	0	0	0	0	0	0	0	0	1	0	0	0
611	JI0102	P. sativum	0	0	0	0	1	0	0	0	0	0	0	1	0	0	landrace	1e-05	0.999978	1.18e-05	1e-05	1.03333e-05	1e-05	0.99996	1e-05	1e-05	1e-05	1e-05	1e-05	1e-05	0.99993	1e-05	1e-05	0	0	0	0	0	0	0	0	0	0	0	0	1	0	0	0
612	JI0098	P. sativum	0	0	0	0	1	0	0	0	0	0	0	1	0	0	landrace	1.1e-05	0.999979	1e-05	1e-05	1.03333e-05	1.03333e-05	0.999959	1e-05	1e-05	1e-05	1e-05	1e-05	1e-05	0.99993	1e-05	1e-05	0	0	0	0	0	0	0	0	0	0	0	0	1	0	0	0
613	JI0109	P. sativum	0	0	0	0	1	0	0	0	0	0	0	1	0	0	landrace	1e-05	0.99998	1e-05	1e-05	1.06667e-05	1e-05	0.999959	1e-05	1e-05	1e-05	1e-05	1e-05	1e-05	0.99993	1e-05	1e-05	0	0	0	0	0	0	0	0	0	0	0	0	1	0	0	0
614	JI0086	P. sativum	0	0	0	0	1	0	0	0	0	0	0	1	0	0	landrace	1.06e-05	0.999979	1.04e-05	1e-05	1.06667e-05	1e-05	0.999959	1e-05	1e-05	1e-05	1e-05	1e-05	1e-05	0.99993	1e-05	1e-05	0	0	0	0	0	0	0	0	0	0	0	0	1	0	0	0
615	JI0752	P. sativum	0	0	0	0	1	0	0	0	0	0	0	1	0	0	landrace	1e-05	0.99998	1.02e-05	1e-05	1.1e-05	1e-05	0.999959	1e-05	1e-05	1e-05	1e-05	1e-05	1e-05	0.99993	1e-05	1e-05	0	0	0	0	0	0	0	0	0	0	0	0	1	0	0	0
616	JI0241	P. humile	0	0	0	1	0	0	0	0	0	1	0	0	0	0	other wild	1e-05	0.99998	1e-05	1e-05	1.26667e-05	1e-05	0.999957	1.03333e-05	1e-05	1e-05	1e-05	1e-05	1e-05	0.99993	1e-05	1e-05	0	0	0	0	0	0	0	0	0	0	0	0	1	0	0	0
617	JI0108	P. sativum	0	0	0	0	1	0	0	0	0	0	0	1	0	0	landrace	1.02e-05	0.99998	1e-05	1e-05	1e-05	1.23333e-05	0.999958	1e-05	1.1e-05	1e-05	1e-05	1e-05	1e-05	0.999929	1e-05	1e-05	0	0	0	0	0	0	0	0	0	0	0	0	1	0	0	0
618	JI0251	P. sativum	0	0	0	0	1	0	0	0	0	0	0	1	0	0	landrace	1.2e-05	0.999978	1e-05	1e-05	1.26667e-05	1e-05	0.999957	1e-05	1e-05	1e-05	1.1e-05	1e-05	1e-05	0.999929	1e-05	1e-05	0	0	0	0	0	0	0	0	0	0	0	0	1	0	0	0
619	JI0252	P. sativum	0	0	0	0	1	0	0	0	0	0	0	1	0	0	landrace	1.14e-05	0.999979	1e-05	1e-05	1e-05	1e-05	0.99996	1e-05	1.2e-05	1e-05	1e-05	1e-05	1e-05	0.999928	1e-05	1e-05	0	0	0	0	0	0	0	0	0	0	0	0	1	0	0	0
620	JI0099	P. sativum	0	0	0	0	1	0	0	0	0	0	0	1	0	0	landrace	1e-05	0.99998	1e-05	1e-05	1.2e-05	1e-05	0.999958	1.03333e-05	1.2e-05	1e-05	1e-05	1e-05	1e-05	0.999928	1e-05	1e-05	0	0	0	0	0	0	0	0	0	0	0	0	1	0	0	0
621	JI3006	P. sativum	0	0	0	0	1	0	0	0	0	0	0	0	0	1	other	1.06e-05	0.999979	1e-05	1e-05	1e-05	1e-05	0.99996	1.03333e-05	1e-05	1e-05	1.1e-05	1e-05	1e-05	0.999927	1e-05	1.2e-05	0	0	0	0	0	0	0	0	0	0	0	0	1	0	0	0
622	JI0716	P. sativum	0	0	0	0	1	0	0	0	0	0	0	1	0	0	landrace	1e-05	0.99998	1.02e-05	1e-05	1.03333e-05	1e-05	0.99996	1e-05	1.1e-05	1e-05	1.2e-05	1.2e-05	1e-05	0.999924	1e-05	1e-05	0	0	0	0	0	0	0	0	0	0	0	0	1	0	0	0
623	JI0094	P. sativum	0	0	0	0	1	0	0	0	0	0	0	1	0	0	landrace	1e-05	0.99998	1e-05	1e-05	1.03333e-05	1e-05	0.999957	1.3e-05	1e-05	1e-05	1e-05	1e-05	1e-05	0.999923	1e-05	1.7e-05	0	0	0	0	0	0	0	0	0	0	0	0	1	0	0	0
624	JI0085	P. sativum	0	0	0	0	1	0	0	0	0	0	0	1	0	0	landrace	1e-05	0.99998	1e-05	1e-05	1e-05	1e-05	0.99996	1e-05	1e-05	1e-05	1e-05	1e-05	0.019745	0.980195	1e-05	1e-05	0	0	0	0	0	0	0	0	0	0	0	0	1	0	0	0
625	JI1121	P. sativum	0	0	0	0	1	0	0	0	0	0	0	0	1	0	cultivar	1e-05	0.99998	1e-05	1e-05	1e-05	1e-05	0.99996	1e-05	1e-05	1e-05	1e-05	1e-05	0.076393	0.923547	1e-05	1e-05	0	0	0	0	0	0	0	0	0	0	0	0	1	0	0	0
626	JI1117	P. sativum	0	0	0	0	1	0	0	0	0	0	0	1	0	0	landrace	1e-05	0.99998	1e-05	1e-05	1e-05	1.06667e-05	0.999959	1e-05	1e-05	1e-05	1e-05	1e-05	0.089847	0.910093	1e-05	1e-05	0	0	0	0	0	0	0	0	0	0	0	0	1	0	0	0
627	JI1109	P. sativum	0	0	0	0	1	0	0	0	0	0	0	1	0	0	landrace	1e-05	0.99998	1e-05	1e-05	1e-05	1e-05	0.99996	1e-05	1e-05	1e-05	1e-05	1e-05	0.093896	0.906044	1e-05	1e-05	0	0	0	0	0	0	0	0	0	0	0	0	1	0	0	0
628	JI0181	P. sativum	0	0	0	0	1	0	0	0	0	0	0	1	0	0	landrace	1e-05	0.99998	1e-05	1.03333e-05	1e-05	1e-05	0.99996	1e-05	1e-05	1e-05	1e-05	1e-05	0.104785	0.895155	1e-05	1e-05	0	0	0	0	0	0	0	0	0	0	0	0	1	0	0	0
629	JI1578	P. sativum	0	0	0	0	1	0	0	0	0	0	0	1	0	0	landrace	0.170863	0.829127	1e-05	0.0376163	0.128584	1e-05	0.83378	1e-05	0.021441	0.164298	1e-05	1e-05	1e-05	0.814211	1e-05	1e-05	0	0	0	0	0	0	0	0	0	0	0	0	1	0	0	0
630	JI0754	P. sativum	0	0	0	0	1	0	0	0	0	0	0	0	1	0	cultivar	0.18611	0.81388	1e-05	0.145327	0.0613913	1e-05	0.793262	1e-05	1e-05	0.223129	1e-05	1e-05	1e-05	0.776811	1e-05	1e-05	0	0	0	0	0	0	0	0	0	0	0	0	1	0	0	0
631	JI1261	P. sativum	0	0	0	0	1	0	0	0	0	0	0	1	0	0	landrace	0.0627394	0.937251	1e-05	0.085106	1e-05	1e-05	0.914864	1e-05	1e-05	1e-05	1e-05	1e-05	0.244829	0.755111	1e-05	1e-05	0	0	0	0	0	0	0	0	0	0	0	0	1	0	0	0
632	JI1539	P. sativum	0	0	0	0	1	0	0	0	0	0	0	1	0	0	landrace	0.259935	0.740055	1e-05	0.199891	0.0783457	1e-05	0.721743	1e-05	1e-05	0.287505	1e-05	1e-05	1e-05	0.712435	1e-05	1e-05	0	0	0	0	0	0	0	0	0	0	0	0	1	0	0	0
633	JI3098	P. sativum	0	0	0	0	1	0	0	0	0	0	0	0	0	1	other	0.301359	0.698631	1e-05	1e-05	0.308375	1e-05	0.691595	1e-05	0.25279	1e-05	1e-05	1e-05	0.093284	0.653876	1e-05	1e-05	0	0	0	0	0	0	0	0	0	0	0	0	1	0	0	0
634	JI1543	P. sativum	0	0	0	0	1	0	0	0	0	0	0	1	0	0	landrace	0.226653	0.773337	1e-05	0.179726	0.000245333	0.172914	0.647105	1e-05	1e-05	1e-05	0.261799	0.038382	1e-05	0.645963	1e-05	0.053816	0	0	0	0	0	0	0	0	0	0	0	0	1	0	0	0
635	JI2429	P. sativum	0	0	0	0	1	0	0	0	0	0	0	0	0	1	other	0.348025	0.651965	1e-05	0.0815323	0.2714	1e-05	0.647048	1e-05	0.23319	1e-05	0.086726	0.041379	1e-05	0.638665	1e-05	1e-05	0	0	0	0	0	0	0	0	0	0	0	0	1	0	0	0
636	JI1542	P. sativum	0	0	0	0	1	0	0	0	0	0	0	1	0	0	landrace	0.325809	0.674181	1e-05	0.272999	0.075427	1e-05	0.651554	1e-05	1e-05	0.369706	1e-05	1e-05	1e-05	0.630234	1e-05	1e-05	0	0	0	0	0	0	0	0	0	0	0	0	1	0	0	0
637	JI1269	P. sativum	0	0	0	0	1	0	0	0	0	0	0	1	0	0	landrace	0.244551	0.755439	1e-05	0.268306	1e-05	1e-05	0.731664	1e-05	1e-05	1e-05	1e-05	1e-05	0.3794	0.62054	1e-05	1e-05	0	0	0	0	0	0	0	0	0	0	0	0	1	0	0	0
638	JI1491	P. sativum	0	0	0	0	1	0	0	0	0	0	0	1	0	0	landrace	0.360549	0.639441	1e-05	0.275388	0.0955117	1e-05	0.62908	1e-05	0.001676	0.381284	1e-05	1e-05	1e-05	0.61699	1e-05	1e-05	0	0	0	0	0	0	0	0	0	0	0	0	1	0	0	0
639	JI0276	P. sativum	0	0	0	0	1	0	0	0	0	0	0	1	0	0	landrace	0.371194	0.628796	1e-05	0.36433	0.030342	1e-05	0.605308	1e-05	1e-05	0.416814	1e-05	1e-05	1e-05	0.583126	1e-05	1e-05	0	0	0	0	0	0	0	0	0	0	0	0	1	0	0	0
640	JI1956	P. sativum	0	0	0	0	1	0	0	0	0	0	0	1	0	0	landrace	0.235871	0.764119	1e-05	0.103191	0.0233623	0.295964	0.577473	1e-05	0.003312	1e-05	0.220973	0.009896	1e-05	0.568779	1e-05	0.19701	0	0	0	0	0	0	0	0	0	0	0	0	1	0	0	0
641	JI1089	P. elatius	0	1	0	0	0	0	0	0	1	0	0	0	0	0	P. elatius	0.150145	0.849845	1e-05	1e-05	1.06667e-05	0.442847	0.557123	1e-05	0.014902	1e-05	1e-05	1e-05	1e-05	0.553464	1e-05	0.431584	0	0	0	0	0	0	0	0	0	0	0	0	1	0	0	0
642	JI1268	P. sativum	0	0	0	0	1	0	0	0	0	0	0	1	0	0	landrace	0.24719	0.7528	1e-05	0.283914	1e-05	1e-05	0.716056	1e-05	1.8e-05	1e-05	1e-05	1e-05	0.44704	0.552892	1e-05	1e-05	0	0	0	0	0	0	0	0	0	0	0	0	1	0	0	0
643	JI1698	P. sativum	0	0	0	0	1	0	0	0	0	0	0	1	0	0	landrace	0.353365	0.646625	1e-05	0.354608	1e-05	0.0928733	0.552499	1e-05	1e-05	1e-05	0.346457	0.104763	1e-05	0.54873	1e-05	1e-05	0	0	0	0	0	0	0	0	0	0	0	0	1	0	0	0
644	JI1270	P. sativum	0	0	0	0	1	0	0	0	0	0	0	1	0	0	landrace	0.345816	0.654174	1e-05	0.348184	0.020292	1e-05	0.631504	1e-05	0.002256	0.04272	1e-05	1e-05	0.424705	0.530279	1e-05	1e-05	0	0	0	0	0	0	0	0	0	0	0	0	1	0	0	0
645	JI0082	P. sativum	0	0	0	0	1	0	0	0	0	0	0	1	0	0	landrace	0.447693	0.552297	1e-05	0.149319	0.303963	1e-05	0.546698	1e-05	0.298439	1e-05	0.036228	0.018208	0.127055	0.52004	1e-05	1e-05	0	0	0	0	0	0	0	0	0	0	0	0	1	0	0	0
646
647
648
649	JI2350	P. sativum	0	0	0	0	1	0	0	0	0	0	0	1	0	0	landrace	0.469654	0.530336	1e-05	0.383482	0.113127	1.03333e-05	0.503371	1e-05	0.057461	0.443157	1e-05	1e-05	0.000475	0.498867	1e-05	1e-05	0	0	0	0	0	0	0	0	0	0	0	0		1	0	0
650	JI1398	P. sativum	0	0	0	0	1	0	0	0	0	1	0	0	0	0	other wild	0.488519	0.511471	1e-05	0.420022	0.0906017	1e-05	0.489357	1e-05	0.011976	0.50752	1e-05	1e-05	1e-05	0.480454	1e-05	1e-05	0	0	0	0	0	0	0	0	0	0	0	0	0	1	0	0
651	JI2105	P. sativum	0	0	0	0	1	0	0	0	0	1	0	0	0	0	other wild	0.418789	0.563614	0.017597	0.318147	1e-05	0.285595	0.396238	1e-05	1e-05	1e-05	0.510837	1e-05	1e-05	0.388711	1.1e-05	0.100402	0	0	0	0	0	0	0	0	0	0	0	0	0	1	0	0
652	JI2345	P. sativum	0	0	0	0	1	0	0	0	0	0	0	1	0	0	landrace	0.481487	0.518503	1e-05	0.438749	0.0620577	1e-05	0.499173	1e-05	0.009263	0.395812	1e-05	1e-05	0.116673	0.478212	1e-05	1e-05	0	0	0	0	0	0	0	0	0	0	0	0	0	1	0	0
653	JI0080	P. sativum	0	0	0	0	1	0	0	0	0	0	0	1	0	0	landrace	0.389194	0.610796	1e-05	0.13238	0.165405	0.280439	0.421766	1e-05	0.138305	1e-05	1e-05	1e-05	0.24814	0.359527	1e-05	0.253988	0	0	0	0	0	0	0	0	0	0	0	0	0	1	0	0
654	JI3022	P. sativum	0	0	0	0	1	0	0	0	0	0	0	0	0	1	other	0.398292	0.601698	1e-05	0.0460983	0.208971	0.349101	0.39582	1e-05	0.164291	1e-05	0.118921	0.012236	0.064434	0.369695	1e-05	0.270403	0	0	0	0	0	0	0	0	0	0	0	0	0	1	0	0
655	JI0247	P. sativum	0	0	0	0	1	0	0	0	0	0	0	0	1	0	cultivar	0.367897	0.632093	1e-05	0.191835	0.0544847	0.358331	0.39534	1e-05	0.042083	0.077781	0.043956	1e-05	0.169279	0.348338	1e-05	0.318543	0	0	0	0	0	0	0	0	0	0	0	0	0	1	0	0
656
657
658
659	JI0189	P. sativum	0	0	0	0	1	0	0	0	0	0	0	1	0	0	landrace	0.346326	0.653664	1e-05	1e-05	1e-05	0.999958	1.16667e-05	1e-05	1e-05	1e-05	1e-05	1e-05	1e-05	1e-05	1e-05	0.99993	0	0	0	0	0	0	0	0	0	0	0	1	0	0	0	0
660	JI0328	P. sativum	0	0	0	0	1	0	0	0	0	0	0	1	0	0	landrace	0.249163	0.750827	1e-05	1e-05	1e-05	0.999957	1.13333e-05	1.2e-05	1.3e-05	1e-05	1e-05	1e-05	1e-05	1e-05	1e-05	0.999927	0	0	0	0	0	0	0	0	0	0	0	1	0	0	0	0
661	JI0157	P. sativum	0	0	0	0	1	0	0	0	0	0	0	1	0	0	landrace	0.258627	0.741363	1e-05	1e-05	1e-05	0.999958	1.16667e-05	1e-05	1.4e-05	1e-05	1e-05	1e-05	1e-05	1e-05	1e-05	0.999926	0	0	0	0	0	0	0	0	0	0	0	1	0	0	0	0
662	JI1088	P. elatius	0	1	0	0	0	0	0	0	1	0	0	0	0	0	P. elatius	0.343069	0.603362	0.0535684	1e-05	1e-05	0.99996	1e-05	1e-05	0.004855	1e-05	1e-05	1e-05	1e-05	1e-05	1e-05	0.995085	0	0	0	0	0	0	0	0	0	0	0	1	0	0	0	0
663	JI0268	P. sativum	0	0	0	0	1	0	0	0	0	0	0	1	0	0	landrace	0.347453	0.608681	0.0438656	1e-05	1e-05	0.99996	1e-05	1e-05	0.00866	1e-05	1e-05	1e-05	1e-05	1e-05	1e-05	0.99128	0	0	0	0	0	0	0	0	0	0	0	1	0	0	0	0
664	JI2603	P. sativum	0	0	0	0	1	0	0	0	0	1	0	0	0	0	other wild	0.342771	0.642947	0.0142826	1e-05	1e-05	0.999957	1.26667e-05	1.03333e-05	0.014849	1e-05	1e-05	1e-05	1e-05	1e-05	1e-05	0.985091	0	0	0	0	0	0	0	0	0	0	0	1	0	0	0	0
665	JI3150	P. elatius	0	1	0	0	0	0	0	0	1	0	0	0	0	0	P. elatius	0.244035	0.526339	0.229626	1e-05	1e-05	0.752388	0.130782	0.11681	1e-05	1e-05	1e-05	1e-05	1e-05	0.033725	1e-05	0.966215	0	0	0	0	0	0	0	0	0	0	0	1	0	0	0	0
666	JI3151	P. elatius	0	1	0	0	0	0	0	0	1	0	0	0	0	0	P. elatius	0.24289	0.527429	0.229681	1e-05	1e-05	0.752026	0.131642	0.116312	1e-05	1e-05	1e-05	1e-05	1e-05	0.034858	1e-05	0.965082	0	0	0	0	0	0	0	0	0	0	0	1	0	0	0	0
667	JI0190	P. sativum	0	0	0	0	1	0	0	0	0	0	0	1	0	0	landrace	0.389096	0.610894	1e-05	1e-05	1.16667e-05	0.999958	1e-05	1e-05	0.049291	1e-05	1e-05	1e-05	1e-05	1e-05	1e-05	0.950649	0	0	0	0	0	0	0	0	0	0	0	1	0	0	0	0
668	JI1087	P. elatius	0	1	0	0	0	0	0	0	1	0	0	0	0	0	P. elatius	0.348655	0.579137	0.072208	1e-05	1e-05	0.951285	0.048685	1e-05	0.026431	0.014026	0.011375	1e-05	0.002544	1e-05	1e-05	0.945594	0	0	0	0	0	0	0	0	0	0	0	1	0	0	0	0
669	JI3148	P. elatius	0	1	0	0	0	0	0	0	1	0	0	0	0	0	P. elatius	0.355814	0.571114	0.0730712	1e-05	1e-05	0.94724	0.0527297	1.06667e-05	0.03282	0.020546	0.001143	1e-05	0.00977	1e-05	1e-05	0.935691	0	0	0	0	0	0	0	0	0	0	0	1	0	0	0	0
670	JI3511	P. elatius	0	1	0	0	0	0	0	0	1	0	0	0	0	0	P. elatius	0.266189	0.513288	0.220523	1e-05	1e-05	0.734043	0.145428	0.120509	1e-05	1e-05	1e-05	1e-05	1e-05	0.080195	0.012223	0.907532	0	0	0	0	0	0	0	0	0	0	0	1	0	0	0	0
671	JI3153	P. elatius	0	1	0	0	0	0	0	0	1	0	0	0	0	0	P. elatius	0.266616	0.518556	0.214828	1e-05	1e-05	0.775876	0.0946937	0.12941	1e-05	1e-05	1e-05	1e-05	1e-05	0.055616	0.071112	0.873222	0	0	0	0	0	0	0	0	0	0	0	1	0	0	0	0
672	JI0185	P. sativum	0	0	0	0	1	0	0	0	0	0	0	1	0	1	landrace/other	0.486189	0.513801	1e-05	1e-05	0.177376	0.822594	1e-05	1e-05	0.202017	1e-05	0.054324	1e-05	1e-05	1e-05	1e-05	0.74361	0	0	0	0	0	0	0	0	0	0	0	1	0	0	0	0
673	JI0250	P. sativum ssp jomardii	0	0	0	0	0	1	0	0	0	1	0	0	0	0	other wild	0.483884	0.516106	1e-05	0.121487	0.0487623	0.829731	1e-05	1e-05	0.021811	0.092241	0.164423	0.029624	1e-05	1e-05	1e-05	0.691871	0	0	0	0	0	0	0	0	0	0	0	1	0	0	0	0
674	JI2548	P. sativum transcaucasicum	0	0	0	0	0	0	1	0	0	1	0	0	0	0	other wild	0.350932	0.583201	0.0658678	0.0855723	1e-05	0.695688	0.218719	1e-05	1e-05	0.038166	0.176383	1e-05	1e-05	0.193468	1e-05	0.591944	0	0	0	0	0	0	0	0	0	0	0	1	0	0	0	0
675
676
677
678	JI3276	P. elatius	0	1	0	0	0	0	0	0	1	0	0	0	0	0	P. elatius	0.0764708	0.341161	0.582368	1e-05	1e-05	0.388221	0.104685	0.507074	1e-05	1e-05	1e-05	1e-05	1e-05	0.060091	0.444181	0.495679	0	0	0	0	0	0	0	0	0	0	0	0	0	0	0	1
679	JI1794	P. humile	0	0	0	1	0	0	0	0	0	1	0	0	0	0	other wild	0.0754422	0.342175	0.582383	1e-05	1e-05	0.388168	0.104905	0.506906	1.2e-05	1e-05	1e-05	1e-05	1e-05	0.060152	0.443895	0.495902	0	0	0	0	0	0	0	0	0	0	0	0	0	0	0	1
680	JI3158	P. elatius	0	1	0	0	0	0	0	0	1	0	0	0	0	0	P. elatius	0.0906698	0.364454	0.544876	1e-05	1e-05	0.407835	0.120292	0.471853	1e-05	1e-05	1e-05	1e-05	1e-05	0.079923	0.415358	0.504669	0	0	0	0	0	0	0	0	0	0	0	0	0	0	0	1
681	JI3159	P. elatius	0	1	0	0	0	0	0	0	1	0	0	0	0	0	P. elatius	0.0875806	0.364077	0.548343	1e-05	1e-05	0.403843	0.120712	0.475425	1e-05	1e-05	1e-05	1e-05	1e-05	0.080701	0.418939	0.50031	0	0	0	0	0	0	0	0	0	0	0	0	0	0	0	1
682	JI2698	P. humile	0	0	0	1	0	0	0	0	0	1	0	0	0	0	other wild	0.101457	0.351073	0.54747	1e-05	1.03333e-05	0.401904	0.119279	0.478796	1e-05	1e-05	1e-05	1e-05	1e-05	0.082234	0.424157	0.493559	0	0	0	0	0	0	0	0	0	0	0	0	0	0	0	1
683	JI2538	P. elatius	0	1	0	0	0	0	0	0	1	0	0	0	0	0	P. elatius	0.103209	0.360564	0.536227	1e-05	1e-05	0.400767	0.12951	0.469704	1e-05	1e-05	1e-05	1e-05	1e-05	0.097029	0.419856	0.483065	0	0	0	0	0	0	0	0	0	0	0	0	0	0	0	1
684	JI0199	P. elatius	0	1	0	0	0	0	0	0	1	0	0	0	0	0	P. elatius	0.445023	0.050311	0.504666	0.484059	1e-05	0.0185817	1e-05	0.49734	1e-05	0.24365	0.13242	1e-05	0.123824	1e-05	0.490297	0.009779	0	0	0	0	0	0	0	0	0	0	0	0	0	0	0	1
685																																																	0
686																																																	0
687																																																	0
688	JI1096	P. elatius	0	1	0	0	0	0	0	0	1	0	0	0	0	0	P. elatius	1e-05	1e-05	0.99998	1e-05	1e-05	1e-05	1e-05	0.99996	1e-05	1e-05	1e-05	1e-05	1e-05	1e-05	0.99993	1e-05	0	0	0	0	0	0	0	0	0	0	0	0	0	0	1	0
689	JI0249	P. sativum	0	0	0	0	1	0	0	0	0	1	0	0	0	0	other wild	1.12e-05	1e-05	0.999979	1e-05	1e-05	1e-05	1e-05	0.99996	1e-05	1e-05	1e-05	1e-05	1e-05	1e-05	0.99993	1e-05	0	0	0	0	0	0	0	0	0	0	0	0	0	0	1	0
690	JI1095	P. elatius	0	1	0	0	0	0	0	0	1	0	0	0	0	0	P. elatius	1.18e-05	1e-05	0.999978	1e-05	1e-05	1e-05	1e-05	0.99996	1e-05	1e-05	1e-05	1e-05	1e-05	1e-05	0.99993	1e-05	0	0	0	0	0	0	0	0	0	0	0	0	0	0	1	0
691	JI1092	P. elatius	0	1	0	0	0	0	0	0	1	0	0	0	0	0	P. elatius	1.18e-05	1.12e-05	0.999977	1e-05	1e-05	1e-05	1e-05	0.99996	1e-05	1e-05	1e-05	1e-05	1e-05	1e-05	0.99993	1e-05	0	0	0	0	0	0	0	0	0	0	0	0	0	0	1	0
692	JI1093	P. elatius	0	1	0	0	0	0	0	0	1	0	0	0	0	0	P. elatius	1e-05	1e-05	0.99998	1e-05	1e-05	1e-05	1.03333e-05	0.99996	1e-05	1e-05	1e-05	1e-05	1e-05	1e-05	0.99993	1e-05	0	0	0	0	0	0	0	0	0	0	0	0	0	0	1	0
693	JI3553	P. elatius	0	1	0	0	0	0	0	0	1	0	0	0	0	0	P. elatius	1e-05	1.1e-05	0.999979	1e-05	1.03333e-05	1e-05	1e-05	0.99996	1e-05	1e-05	1e-05	1e-05	1e-05	1e-05	0.99993	1e-05	0	0	0	0	0	0	0	0	0	0	0	0	0	0	1	0
694	JI3557	P. elatius	0	1	0	0	0	0	0	0	1	0	0	0	0	0	P. elatius	1e-05	1.04e-05	0.99998	1e-05	1e-05	1e-05	1.06667e-05	0.999959	1e-05	1e-05	1e-05	1e-05	1e-05	1e-05	0.99993	1e-05	0	0	0	0	0	0	0	0	0	0	0	0	0	0	1	0
695	JI0224	P. fulvum	0	0	1	0	0	0	0	1	0	0	0	0	0	0	P. fulvum	1.16e-05	1.12e-05	0.999977	1e-05	1.1e-05	1e-05	1.03333e-05	0.999959	1e-05	1e-05	1e-05	1e-05	1e-05	1e-05	0.99993	1e-05	0	0	0	0	0	0	0	0	0	0	0	0	0	0	1	0
696	JI1010	P. fulvum	0	0	1	0	0	0	0	1	0	0	0	0	0	0	P. fulvum	1e-05	1e-05	0.99998	1e-05	1.1e-05	1e-05	1.06667e-05	0.999958	1e-05	1e-05	1e-05	1e-05	1e-05	1e-05	0.99993	1e-05	0	0	0	0	0	0	0	0	0	0	0	0	0	0	1	0
697	JI1796	P. fulvum	0	0	1	0	0	0	0	1	0	0	0	0	0	0	P. fulvum	1e-05	1e-05	0.99998	1e-05	1e-05	1e-05	1.23333e-05	0.999958	1e-05	1e-05	1e-05	1e-05	1e-05	1e-05	0.99993	1e-05	0	0	0	0	0	0	0	0	0	0	0	0	0	0	1	0
698	JI2523	P. fulvum	0	0	1	0	0	0	0	1	0	0	0	0	0	0	P. fulvum	1e-05	1e-05	0.99998	1.06667e-05	1.1e-05	1.06667e-05	1e-05	0.999958	1e-05	1e-05	1e-05	1e-05	1e-05	1e-05	0.99993	1e-05	0	0	0	0	0	0	0	0	0	0	0	0	0	0	1	0
699	JI1094	P. elatius	0	1	0	0	0	0	0	0	1	0	0	0	0	0	P. elatius	1e-05	1.12e-05	0.999979	1e-05	1.1e-05	1.16667e-05	1e-05	0.999957	1e-05	1e-05	1e-05	1e-05	1e-05	1e-05	0.99993	1e-05	0	0	0	0	0	0	0	0	0	0	0	0	0	0	1	0
700	JI2530	P. fulvum	0	0	1	0	0	0	0	1	0	0	0	0	0	0	P. fulvum	1e-05	1.1e-05	0.999979	1e-05	1.06667e-05	1.23333e-05	1.03333e-05	0.999956	1e-05	1e-05	1e-05	1e-05	1e-05	1e-05	0.99993	1e-05	0	0	0	0	0	0	0	0	0	0	0	0	0	0	1	0
701	JI2517	P. fulvum	0	0	1	0	0	0	0	1	0	0	0	0	0	0	P. fulvum	1e-05	1.02e-05	0.99998	1e-05	1.1e-05	1.26667e-05	1.06667e-05	0.999956	1e-05	1e-05	1e-05	1e-05	1e-05	1e-05	0.99993	1e-05	0	0	0	0	0	0	0	0	0	0	0	0	0	0	1	0
702	JI1006	P. fulvum	0	0	1	0	0	0	0	1	0	0	0	0	0	0	P. fulvum	1e-05	1e-05	0.99998	1e-05	1e-05	1e-05	1.06667e-05	0.999959	1e-05	1e-05	1.1e-05	1e-05	1e-05	1e-05	0.999929	1e-05	0	0	0	0	0	0	0	0	0	0	0	0	0	0	1	0
703	JI2544	P. fulvum	0	0	1	0	0	0	0	1	0	0	0	0	0	0	P. fulvum	1e-05	1.1e-05	0.999979	1e-05	1e-05	1e-05	1.16667e-05	0.999958	1e-05	1e-05	1.1e-05	1e-05	1e-05	1e-05	0.999929	1e-05	0	0	0	0	0	0	0	0	0	0	0	0	0	0	1	0
704	JI2473	P. fulvum	0	0	1	0	0	0	0	1	0	0	0	0	0	0	P. fulvum	1e-05	1.12e-05	0.999979	1e-05	1e-05	1e-05	1e-05	0.99996	1e-05	1e-05	1.1e-05	1.1e-05	1e-05	1e-05	0.999928	1e-05	0	0	0	0	0	0	0	0	0	0	0	0	0	0	1	0
705	JI2519	P. fulvum	0	0	1	0	0	0	0	1	0	0	0	0	0	0	P. fulvum	1e-05	1.04e-05	0.99998	1e-05	1e-05	1e-05	1.06667e-05	0.999959	1e-05	1e-05	1e-05	1.2e-05	1e-05	1e-05	0.999928	1e-05	0	0	0	0	0	0	0	0	0	0	0	0	0	0	1	0
706	JI3558	P. elatius	0	1	0	0	0	0	0	0	1	0	0	0	0	0	P. elatius	1e-05	1.14e-05	0.999979	1e-05	1e-05	1e-05	1e-05	0.99996	1.3e-05	1e-05	1e-05	1.1e-05	1e-05	1e-05	0.999927	1e-05	0	0	0	0	0	0	0	0	0	0	0	0	0	0	1	0
707	JI2055	P. elatius	0	1	0	0	0	0	0	0	1	0	0	0	0	0	P. elatius	1e-05	1e-05	0.99998	1e-05	1e-05	1e-05	1.06667e-05	0.999959	1.3e-05	1e-05	1e-05	1e-05	1e-05	1e-05	0.999927	1e-05	0	0	0	0	0	0	0	0	0	0	0	0	0	0	1	0
708	JI1091	P. elatius	0	1	0	0	0	0	0	0	1	0	0	0	0	0	P. elatius	1e-05	1e-05	0.99998	1e-05	1e-05	1e-05	1e-05	0.99996	1e-05	1e-05	1.5e-05	1e-05	1e-05	1e-05	0.999925	1e-05	0	0	0	0	0	0	0	0	0	0	0	0	0	0	1	0
709	JI2206	P. fulvum	0	0	1	0	0	0	0	1	0	0	0	0	0	0	P. fulvum	1e-05	1e-05	0.99998	1.16667e-05	1e-05	1e-05	1e-05	0.999958	1.2e-05	1e-05	1e-05	1.2e-05	1.1e-05	1e-05	0.999925	1e-05	0	0	0	0	0	0	0	0	0	0	0	0	0	0	1	0
710	JI2385	P. abyssinicum	1	0	0	0	0	0	0	0	0	0	1	0	0	0	P. abyssinicum	0.0181882	4.88e-05	0.981763	1e-05	0.025329	1e-05	0.00950133	0.96515	0.028117	1e-05	1.2e-05	1e-05	1e-05	0.014927	0.956904	1e-05	0	0	0	0	0	0	0	0	0	0	0	0	0	0	1	0
711	JI2202	P. abyssinicum	1	0	0	0	0	0	0	0	0	0	1	0	0	0	P. abyssinicum	0.0198962	0.0007114	0.979393	1e-05	0.026648	1e-05	0.0103777	0.962955	0.029221	1e-05	1e-05	1e-05	1e-05	0.015907	0.954822	1e-05	0	0	0	0	0	0	0	0	0	0	0	0	0	0	1	0
712	JI0002	P. abyssinicum	1	0	0	0	0	0	0	0	0	0	1	0	0	0	P. abyssinicum	0.0224906	0.000507	0.977003	1e-05	0.028697	1e-05	0.0101617	0.961122	0.031228	1e-05	1e-05	1e-05	1e-05	0.01561	0.953113	1e-05	0	0	0	0	0	0	0	0	0	0	0	0	0	0	1	0
713	JI0255	P. elatius	0	1	0	0	0	0	0	0	1	0	0	0	0	0	P. elatius	0.0242794	1e-05	0.975711	1e-05	0.030727	1e-05	0.00933033	0.959922	0.033487	1e-05	1e-05	1e-05	1e-05	0.014597	0.951866	1e-05	0	0	0	0	0	0	0	0	0	0	0	0	0	0	1	0
714	JI3149	P. elatius	0	1	0	0	0	0	0	0	1	0	0	0	0	0	P. elatius	1e-05	0.0277704	0.97222	1e-05	1e-05	0.0454527	0.000108	0.954419	1e-05	1e-05	1e-05	1e-05	1e-05	1e-05	0.931544	0.068396	0	0	0	0	0	0	0	0	0	0	0	0	0	0	1	0
715	JI3273	P. elatius	0	1	0	0	0	0	0	0	1	0	0	0	0	0	P. elatius	1e-05	0.0311524	0.968838	1e-05	1e-05	0.044111	0.00441	0.951459	1e-05	1e-05	1e-05	1e-05	1e-05	1e-05	0.930237	0.069703	0	0	0	0	0	0	0	0	0	0	0	0	0	0	1	0
716	JI3274	P. elatius	0	1	0	0	0	0	0	0	1	0	0	0	0	0	P. elatius	1e-05	0.0310554	0.968935	1e-05	1e-05	0.0489827	0.000739	0.950258	1e-05	1e-05	1e-05	1e-05	1e-05	1e-05	0.929145	0.070795	0	0	0	0	0	0	0	0	0	0	0	0	0	0	1	0
717	JI3275	P. elatius	0	1	0	0	0	0	0	0	1	0	0	0	0	0	P. elatius	0.0185322	0.032741	0.948727	1e-05	0.002638	0.0643867	0.003199	0.929767	1e-05	1e-05	1e-05	1e-05	1e-05	1e-05	0.909015	0.090925	0	0	0	0	0	0	0	0	0	0	0	0	0	0	1	0
718	JI0064	P. elatius	0	1	0	0	0	0	0	0	1	0	0	0	0	0	P. elatius	0.036964	0.0621068	0.90093	1e-05	1.16667e-05	0.116205	0.012118	0.871655	1e-05	1e-05	1e-05	1e-05	1e-05	1e-05	0.846895	0.153045	0	0	0	0	0	0	0	0	0	0	0	0	0	0	1	0
719	JI1795	P. elatius	0	1	0	0	0	0	0	0	1	0	0	0	0	0	P. elatius	0.0397108	0.0658206	0.894469	1e-05	1e-05	0.123283	0.0123863	0.864311	1e-05	1e-05	1e-05	1e-05	1e-05	0.000224	0.839309	0.160417	0	0	0	0	0	0	0	0	0	0	0	0	0	0	1	0
720	JI3263	P. elatius	0	1	0	0	0	0	0	0	1	0	0	0	0	0	P. elatius	0.038425	0.0675628	0.894012	1e-05	1e-05	0.131342	0.0075	0.861138	1e-05	1e-05	1e-05	1e-05	1e-05	1e-05	0.837239	0.162701	0	0	0	0	0	0	0	0	0	0	0	0	0	0	1	0
721	JI1074	P. elatius	0	1	0	0	0	0	0	0	1	0	0	0	0	0	P. elatius	0.0395994	0.062359	0.898042	1e-05	1e-05	0.129134	0.00500667	0.865839	1e-05	1e-05	1e-05	1e-05	1e-05	1e-05	0.836067	0.163873	0	0	0	0	0	0	0	0	0	0	0	0	0	0	1	0
722	JI2724	P. elatius	0	1	0	0	0	0	0	0	1	0	0	0	0	0	P. elatius	0.0443134	0.0630224	0.892664	1e-05	1e-05	0.132364	0.007203	0.860414	1e-05	1e-05	1e-05	1e-05	1e-05	1e-05	0.831653	0.168287	0	0	0	0	0	0	0	0	0	0	0	0	0	0	1	0
723	JI3155	P. elatius	0	1	0	0	0	0	0	0	1	0	0	0	0	0	P. elatius	0.043692	0.063992	0.892316	1e-05	1e-05	0.133148	0.006893	0.859938	1e-05	1e-05	1e-05	1e-05	1e-05	1e-05	0.830875	0.169065	0	0	0	0	0	0	0	0	0	0	0	0	0	0	1	0
724	JI0262	P. elatius	0	1	0	0	0	0	0	0	1	0	0	0	0	0	P. elatius	0.048607	0.075204	0.87619	1e-05	1e-05	0.146344	0.01129	0.842346	1e-05	1e-05	1e-05	1e-05	1e-05	1e-05	0.814732	0.185208	0	0	0	0	0	0	0	0	0	0	0	0	0	0	1	0
725	JI0261	P. elatius	0	1	0	0	0	0	0	0	1	0	0	0	0	0	P. elatius	0.0682264	0.204638	0.727136	1e-05	1e-05	0.244285	0.0745233	0.681172	1.1e-05	1e-05	1e-05	1e-05	1e-05	0.06295	0.65611	0.280888	0	0	0	0	0	0	0	0	0	0	0	0	0	0	1	0
726	JI3147	P. elatius	0	1	0	0	0	0	0	0	1	0	0	0	0	0	P. elatius	0.077431	0.207727	0.714843	1e-05	1.06667e-05	0.255872	0.0753783	0.668729	1e-05	1e-05	1e-05	1e-05	1e-05	0.063118	0.643038	0.293793	0	0	0	0	0	0	0	0	0	0	0	0	0	0	1	0
727	JI0714	P. elatius	0	1	0	0	0	0	0	0	1	0	0	0	0	0	P. elatius	0.381638	0.0404328	0.57793	0.407148	1e-05	0.0240457	1e-05	0.568786	1e-05	0.225974	0.133797	0.004587	0.053978	1e-05	0.560406	0.021238	0	0	0	0	0	0	0	0	0	0	0	0	0	0	1	0
728
729
730
731	JI2629	P. elatius	0	1	0	0	0	0	0	0	1	0	0	0	0	0	P. elatius	0.262843	0.496186	0.24097	1e-05	1e-05	0.686906	0.157332	0.155742	1e-05	1e-05	1e-05	1e-05	1e-05	0.11025	0.091386	0.798314	1	0	0	0	0	0	0	0	0	0	0	0	0	0	0	0
732	JI3157	P. elatius	0	1	0	0	0	0	0	0	1	0	0	0	0	0	P. elatius	0.185976	0.451523	0.362501	1e-05	1e-05	0.593703	0.131545	0.274733	1e-05	1e-05	1e-05	1e-05	1e-05	0.075286	0.199781	0.724884	1	0	0	0	0	0	0	0	0	0	0	0	0	0	0	0
733	JI3156	P. elatius	0	1	0	0	0	0	0	0	1	0	0	0	0	0	P. elatius	0.179943	0.449673	0.370384	1.03333e-05	1e-05	0.588635	0.130163	0.281181	1e-05	1e-05	1e-05	1e-05	1e-05	0.074731	0.205814	0.719405	1	0	0	0	0	0	0	0	0	0	0	0	0	0	0	0
734	JI1075	P. elatius	0	1	0	0	0	0	0	0	1	0	0	0	0	0	P. elatius	0.197609	0.440409	0.361982	1e-05	1e-05	0.59126	0.131435	0.277285	1e-05	1e-05	1e-05	1e-05	1e-05	0.077694	0.205319	0.716937	1	0	0	0	0	0	0	0	0	0	0	0	0	0	0	0
735	JI3162	P. elatius	0	1	0	0	0	0	0	0	1	0	0	0	0	0	P. elatius	0.39749	0.4553	0.14721	0.113048	1e-05	0.699075	0.124783	0.063084	1e-05	1e-05	0.209145	1e-05	1e-05	0.095748	1e-05	0.695056	1	0	0	0	0	0	0	0	0	0	0	0	0	0	0	0
736	JI2201	P. elatius	0	1	0	0	0	0	0	0	1	0	0	0	0	0	P. elatius	0.461604	0.362581	0.175814	0.159153	0.0441363	0.631569	0.0706163	0.094525	0.023028	0.047999	0.198349	1e-05	1e-05	0.035206	0.025801	0.669598	1	0	0	0	0	0	0	0	0	0	0	0	0	0	0	0
737	JI3163	P. elatius	0	1	0	0	0	0	0	0	1	0	0	0	0	0	P. elatius	0.440386	0.359293	0.200321	0.17174	1e-05	0.647139	0.0695903	0.111522	1e-05	1e-05	0.274227	1e-05	1e-05	0.029764	0.040033	0.655935	1	0	0	0	0	0	0	0	0	0	0	0	0	0	0	0
738	JI3080	P. sativum	0	0	0	0	1	0	0	0	0	0	0	0	0	1	other	0.480242	0.483839	0.0359194	0.246651	0.151053	0.231051	0.345349	0.0258967	0.102626	1e-05	0.275689	0.024462	0.118785	0.310497	0.023038	0.144894	1	0	0	0	0	0	0	0	0	0	0	0	0	0	0	0
739	JI0047	P. sativum	0	0	0	0	1	0	0	0	0	0	0	0	0	1	other	0.34043	0.27907	0.3805	1e-05	0.335387	1e-05	0.279112	0.385481	0.325474	1e-05	1e-05	0.015466	1e-05	0.276175	0.382845	1e-05	1	0	0	0	0	0	0	0	0	0	0	0	0	0	0	0
[truncated: 1 more columns]

## Sheet: Table S6
Supplementary Table 6. A summary of the phenotypic records across the entire Pisum diversity panel in this study, for each of the seven contrasting traits that Mendel studied in details. This table corressponds to Figure 1c.
AGIS_CAAS Code	Accession ID in UK	Seed Appearance, R/r Spherical=1 Marrowfat=2 Dimpled (mifo)=3 Dentate=4 Wrinkled=5 Very wrinkled=6	Cotyledon Colour, I/i Yellow=1 Green=2 Orange=3	Flowe color, A/a, Pigmented=1 white=2	Plant height, Le/le, (cM)	Pod color, Gp/gp Green=1 Yellow=2	Pod Parchment, P/p, V/v Absent=1 Present=2	Flower position, Fa/fa 1: Axial, 2: Terminal
SZPS0493	JI2089	4	1	2	NA	1	2	1
SZPE0009	JI0950	1	1	1	NA	1	2	1
SZPS0487	JI2048	2	1	2	NA	1	2	1
SZPS0338	JI1246	1	2	1	51	1	2	1
SZPS0048	JI0083	1	1	2	116	1	2	1
SZPS0070	JI0128	1	2	2	NA	2	2	1
SZPS0003	JI3637	NA	2	2	30.3	1	2	1
SZPS0594	JI2822	6	2	2	32	1	2	1
SZPS0009	JI0015	2	2	2	240	2	2	1
SZPS0029	JI0048	4	NA	2	NA	2	2	1
SZPS0584	JI2716	4	3	2	NA	2	2	1
SZPS0002	JI3635	NA	2	2	25.3	1	2	1
SZPS0451	JI1865	4	2	2	NA	1	1	1
SZPS0149	JI0340	3	1	1	49.7	1	1	1
SZPS0072	JI0132	4	1	2	NA	2	2	1
SZPS0596	JI3022	4	1	2	154	1	2	1
SZPS0543	JI2331	1	3	1	153.7	1	2	1
SZPS0126	JI0267	1	2	2	NA	1	2	1
SZPS0248	JI0795	1	1	2	247	1	NA	2
SZPS0166	JI0391	1	1	1	101	1	2	1
SZPS0591	JI2776	4	1	2	NA	2	2	1
SZPS0004	JI3636	NA	2	2	27.7	1	2	1
SZPS0614	JI3604	NA	2	2	NA	1	2	1
SZPS0015	JI0024	1	1	2	NA	1	2	1
SZPS0161	JI0371	1	1	2	164.3	1	2	1
SZPS0303	JI1071	4	1	2	177.7	1	1	1
SZPS0220	JI0699	1	1	2	NA	1	NA	1
SZPS0129	JI0275	1	1	2	166.3	1	NA	1
SZPS0435	JI1793	4	1	2	173.7	1	NA	1
SZPS0536	JI2311	4	1	2	NA	1	2	1
SZPS0088	JI0162	4	1	2	174.7	1	2	1
SZPS0480	JI1996	4	1	2	156	1	2	1
SZPS0453	JI1882	4	1	1	193.7	1	2	1
SZPS0381	JI1538	4	1	2	139	1	2	1
SZPS0315	JI1132	1	1	2	200	1	1	1
SZPS0308	JI1086	1	1	2	NA	1	1	1
SZPS0582	JI2707	3	1	2	NA	1	NA	1
SZPS0537	JI2312	4	1	2	NA	1	2	1
SZPS0158	JI0364	3	1	1	103.7	1	2	1
SZPS0018	JI0028	4	1	2	162.3	1	2	1
SZPE0013	JI1088	1	1	2	114	1	2	1
SZPS0450	JI1863	4	1	2	89.3	1	1	1
SZPS0010	JI0018	1	1	2	NA	1	2	1
SZPS0083	JI0150	4	1	2	NA	1	2	1
SZPS0457	JI1900	4	1	2	184	1	2	1
SZPS0619	JI3614	NA	2	1	84.7	1	2	1
SZPS0076	JI0138	1	1	1	26.7	1	2	1
SZPS0247	JI0794	4	1	2	178.7	1	1	1
SZPS0182	JI0466	1	1	1	125	1	1	1
SZPS0081	JI0148	4	1	1	153.3	1	2	1
SZPS0613	JI3186	2	1	2	190.3	1	2	1
SZPS0008	JI0014	1	1	2	NA	1	2	1
SZPS0521	JI2228	3	1	1	111.3	1	2	1
SZPE0032	JI3148	1	1	2	NA	1	2	1
SZPS0531	JI2279	4	1	2	161	1	2	1
SZPS0378	JI1528	4	1	2	NA	1	2	1
SZPS0402	JI1626	4	1	2	173.7	1	2	1
SZPE0012	JI1087	4	1	2	NA	1	2	1
SZPS0570	JI2561	4	1	2	147.7	1	2	1
SZPS0085	JI0152	2	3	1	NA	1	2	1
SZPS0033	JI0058	4	2	2	80	2	NA	1
SZPS0571	JI2583	4	1	2	NA	1	1	1
SZPS0119	JI0245	1	1	2	NA	1	2	1
SZPS0569	JI2559	4	1	2	NA	1	2	1
SZPS0446	JI1846	4	1	2	195.3	1	2	1
SZPS0031	JI0055	1	1	2	NA	1	2	1
SZPS0520	JI2223	1	1	1	177.3	1	2	1
SZPS0132	JI0295	4	1	2	NA	1	2	1
SZPS0127	JI0268	1	1	2	124	1	2	1
SZPS0299	JI1043	4	1	2	154.7	1	2	1
SZPS0590	JI2764	1	3	1	131	1	2	1
SZPS0587	JI2753	1	3	1	142.3	1	2	1
SZPS0281	JI0932	1	1	1	113.7	1	2	1
SZPE0029	JI2695	4	1	2	NA	1	2	1
SZPS0449	JI1851	4	1	2	114	1	2	1
SZPS0492	JI2084	4	1	2	201.7	1	2	1
SZPS0121	JI0247	1	1	2	NA	1	2	1
SZPS0605	JI3096	1	1	2	141	1	2	1
SZPS0617	JI3610	NA	3	1	70.7	1	2	1
SZPS0390	JI1573	1	1	1	48.3	1	2	1
SZPS0499	JI2110	6	2	1	57.7	1	2	1
SZPE0008	JI0800	2	1	2	144	1	2	1
SZPS0112	JI0221	1	1	2	161.3	1	2	1
SZPS0589	JI2761	2	1	2	59.3	1	2	1
SZPS0409	JI1698	4	1	2	NA	1	2	1
SZPS0577	JI2659	1	1	1	NA	1	2	1
SZPS0219	JI0695	2	1	2	179.3	1	2	1
SZPS0618	JI3611	NA	2	1	77.7	1	2	1
SZPS0529	JI2274	1	1	1	87.7	1	2	1
SZPS0155	JI0358	1	1	1	85.3	1	2	1
SZPS0616	JI3609	NA	2	1	90	1	2	1
SZPS0575	JI2623	2	2	1	95	1	2	1
SZPS0086	JI0154	4	1	2	69.7	1	2	1
SZPS0026	JI0044	1	1	2	161.7	1	2	1
SZPS0284	JI0952	2	1	2	68.3	1	2	1
SZPS0565	JI2436	2	1	2	78.7	1	2	1
SZPS0380	JI1535	1	2	2	NA	1	2	1
SZPS0148	JI0339	4	1	2	NA	1	1	1
SZPS0615	JI3605	2	2	2	78.3	1	1	1
SZPS0420	JI1722	2	1	2	160	1	2	1
SZPS0153	JI0354	1	2	1	40	1	2	1
SZPS0416	JI1714	2	1	2	NA	1	2	1
SZPS0199	JI0566	2	2	1	86.3	1	2	1
SZPS0162	JI0378	1	1	2	NA	1	2	1
SZPS0163	JI0380	4	1	2	NA	1	2	1
SZPS0034	JI0060	4	1	2	67.3	1	2	1
SZPS0245	JI0787	1	2	2	140.3	1	2	1
SZPS0291	JI0974	2	1	2	165	1	2	1
SZPS0232	JI0734	4	1	2	NA	1	2	1
SZPS0459	JI1911	4	1	2	178.7	1	2	1
SZPS0293	JI1002	1	1	1	129.7	1	2	1
SZPS0063	JI0118	1	2	2	NA	1	2	1
SZPS0024	JI0040	1	2	2	NA	1	2	1
SZPS0096	JI0180	4	1	2	46	1	2	1
SZPS0090	JI0167	2	1	2	214.7	1	2	1
SZPS0330	JI1222	1	1	1	90.7	1	2	1
SZPS0328	JI1217	1	2	1	NA	1	2	1
SZPS0600	JI3030	4	1	2	NA	1	2	1
SZPS0496	JI2105	4	1	2	NA	1	2	1
SZPS0452	JI1870	4	1	2	NA	1	2	1
SZPS0523	JI2236	4	1	2	206	1	2	1
SZPS0472	JI1968	4	2	2	NA	1	2	1
SZPS0104	JI0200	4	1	2	NA	1	NA	1
SZPS0356	JI1345	1	1	1	153.3	1	2	1
SZPS0610	JI3167	1	3	1	141.3	1	2	1
SZPS0465	JI1933	4	1	2	183.3	1	2	1
SZPS0329	JI1219	NA	NA	1	77	1	NA	1
SZPS0438	JI1816	1	2	1	80	1	2	1
SZPS0401	JI1625	4	1	2	181.7	1	2	1
SZPS0504	JI2134	4	1	2	196.3	1	2	1
SZPS0300	JI1055	1	1	1	167.7	1	2	1
SZPS0222	JI0703	4	1	2	187	1	2	1
SZPS0507	JI2152	4	1	2	168.3	1	2	1
SZPS0424	JI1735	1	2	1	74	1	2	1
SZPS0312	JI1125	1	1	1	186.7	1	2	1
SZPS0377	JI1524	1	1	2	NA	1	2	1
SZPS0062	JI0116	4	1	2	NA	1	2	1
SZPS0259	JI0820	1	1	1	80.5	1	2	2
SZPS0128	JI0270	1	1	2	196.7	1	2	1
SZPS0225	JI0712	1	1	2	NA	1	2	1
SZPS0217	JI0692	4	1	2	NA	1	2	1
SZPS0040	JI0071	1	1	2	NA	1	2	1
SZPS0371	JI1486	1	2	2	NA	1	2	1
SZPS0314	JI1129	1	1	1	NA	1	2	1
SZPS0223	JI0705	4	1	2	NA	1	2	1
SZPS0624	JI2649	1	3	1	201.3	1	2	1
SZPS0283	JI0949	1	1	1	160.7	1	2	1
SZPS0386	JI1548	1	1	2	164.7	1	2	1
SZPS0622	JI2647	1	3	1	207.3	1	2	1
SZPS0110	JI0216	1	1	1	146.7	1	2	1
SZPS0355	JI1344	1	1	1	NA	1	2	1
SZPS0353	JI1307	1	1	2	NA	1	2	1
SZPS0385	JI1547	1	1	2	NA	1	2	1
SZPS0369	JI1477	4	1	2	152.7	1	2	1
SZPS0373	JI1492	1	1	1	160.3	1	2	1
SZPS0270	JI0863	4	1	1	147	1	2	1
SZPS0301	JI1058	1	1	1	159	1	2	1
SZPS0276	JI0892	3	1	1	143.7	1	2	1
SZPS0277	JI0893	3	1	1	120	1	2	1
SZPS0500	JI2114	1	2	1	92	1	2	1
SZPS0374	JI1503	1	1	1	NA	1	2	1
SZPS0623	JI2648	1	1	1	188.3	1	NA	1
SZPS0489	JI2061	1	1	2	166.7	1	2	1
SZPS0407	JI1669	4	1	2	194.7	1	2	1
SZPS0001	JI3638	NA	3	1	82.7	1	2	NA
SZPS0415	JI1713	NA	NA	2	139	1	NA	1
SZPS0455	JI1891	4	1	2	NA	1	2	1
SZPS0549	JI2350	1	1	1	172.7	1	2	1
SZPS0462	JI1920	4	1	2	166	1	2	1
SZPS0513	JI2174	4	1	1	125.3	1	2	1
SZPS0054	JI0090	4	2	1	222.3	1	2	1
SZPS0509	JI2154	4	1	2	NA	1	2	1
SZPS0460	JI1915	1	1	1	182	1	2	1
SZPS0612	JI3179	1	3	1	185.3	1	2	1
SZPS0544	JI2332	1	3	1	134	1	2	1
SZPS0032	JI0057	1	2	1	170	1	2	1
SZPS0116	JI0233	4	1	2	166.7	1	2	1
SZPS0073	JI0133	1	1	2	206.7	1	2	1
SZPS0434	JI1792	1	1	1	171.3	1	NA	1
SZPS0580	JI2693	4	2	2	NA	1	1	1
SZPS0331	JI1224	2	1	2	250.7	1	2	1
SZPS0522	JI2233	1	1	1	155.7	1	2	1
SZPS0268	JI0854	3	1	1	99.3	1	2	1
SZPS0020	JI0034	1	1	1	44.3	1	2	1
SZPS0307	JI1085	4	1	1	NA	1	2	1
SZPS0545	JI2344	1	1	1	174.3	1	2	1
SZPS0611	JI3178	4	3	1	153.3	1	2	1
SZPE0043	JI3163	1	1	2	NA	1	2	1
SZPS0550	JI2353	1	1	1	201	1	2	NA
SZPS0007	JI0012	1	1	2	52.3	1	2	1
SZPS0488	JI2058	1	1	1	201	1	2	1
SZPS0068	JI0125	1	1	1	138.3	1	2	1
SZPS0360	JI1398	1	1	1	NA	1	2	1
SZPS0288	JI0965	1	1	1	163.7	1	2	1
SZPS0533	JI2296	1	1	1	NA	1	2	1
SZPS0005	JI0006	4	1	2	163.3	1	2	1
SZPS0372	JI1491	1	1	1	NA	1	2	1
SZPS0525	JI2243	1	1	1	169.7	1	2	1
SZPS0275	JI0887	3	1	1	141	1	2	1
SZPS0585	JI2742	4	3	2	163.3	1	2	1
SZPS0286	JI0957	1	2	1	109.3	1	2	1
SZPS0516	JI2193	1	2	1	67.3	1	2	1
SZPS0538	JI2314	1	2	1	44.7	1	2	1
SZPS0113	JI0222	1	1	1	169	1	2	1
SZPS0111	JI0220	4	1	2	168.3	1	2	1
SZPS0370	JI1482	4	1	2	126.7	1	2	1
SZPS0439	JI1817	1	1	1	NA	1	2	1
SZPS0142	JI0323	1	2	1	NA	1	2	1
SZPS0540	JI2321	1	2	1	78.3	1	2	1
SZPS0218	JI0693	3	2	2	111.3	1	2	1
SZPS0175	JI0423	4	2	1	71.3	1	2	1
SZPS0486	JI2036	3	2	1	55.7	1	2	1
SZPS0320	JI1187	3	2	1	86.7	1	2	1
SZPS0541	JI2324	1	3	1	116.3	1	2	1
SZPS0429	JI1768	1	1	1	64.3	1	2	1
SZPS0305	JI1082	1	1	1	NA	1	2	1
SZPS0176	JI0424	1	2	1	50.3	1	2	1
SZPS0436	JI1800	1	2	1	59.7	1	2	1
SZPS0417	JI1718	3	2	1	93	1	2	1
SZPE0035	JI3151	1	1	2	NA	1	2	1
SZPE0034	JI3150	1	1	2	NA	1	2	1
SZPE0050	JI3511	1	1	2	NA	1	2	1
SZPE0028	JI2629	1	1	2	NA	1	2	1
SZPE0026	JI2201	1	1	2	NA	1	2	1
SZPS0477	JI1989	1	1	1	141	1	2	1
SZPS0254	JI0813	2	1	2	83.7	1	2	1
SZPS0508	JI2153	4	1	2	189.7	1	2	1
SZPS0456	JI1894	4	1	2	165	1	2	1
SZPS0375	JI1519	1	1	2	179.3	1	2	1
SZPS0159	JI0368	4	1	1	209	1	2	1
SZPS0067	JI0124	4	1	2	148.5	1	2	1
SZPS0209	JI0635	4	1	2	NA	1	2	1
SZPS0212	JI0657	2	1	2	80.7	1	2	1
SZPS0333	JI1228	NA	NA	2	NA	1	NA	1
SZPS0400	JI1607	4	1	2	163.7	1	2	1
SZPS0481	JI2001	4	1	2	167.3	1	2	1
SZPS0290	JI0971	1	1	1	165.3	1	2	1
SZPS0171	JI0409	2	2	1	78	1	2	1
SZPS0408	JI1679	4	1	2	205.3	1	2	1
SZPE0021	JI1703	4	1	2	NA	1	2	1
SZPS0458	JI1910	4	1	2	188.3	1	2	1
SZPS0141	JI0322	1	2	2	NA	1	2	1
SZPS0506	JI2150	4	1	1	184.7	1	2	1
SZPS0358	JI1386	2	1	2	86.7	1	2	1
SZPS0318	JI1173	2	2	1	169.7	1	2	1
SZPS0016	JI0025	1	1	2	123	1	NA	1
SZPS0013	JI0021	4	1	2	212.7	1	2	1
SZPS0012	JI0020	4	1	2	143.3	1	2	1
SZPS0036	JI0062	1	1	2	163.3	1	2	1
SZPS0093	JI0175	3	1	2	190	1	2	1
SZPS0094	JI0176	4	1	2	177.7	1	2	1
SZPS0190	JI0516	2	2	1	74	1	2	1
SZPS0227	JI0717	2	1	2	78	1	2	1
SZPS0294	JI1014	2	2	1	77	1	2	1
SZPS0376	JI1523	4	1	2	NA	1	2	1
SZPS0399	JI1592	3	1	2	155.7	1	2	1
SZPS0405	JI1652	4	1	2	154.7	1	2	1
SZPS0414	JI1706	2	1	2	196.3	1	2	1
SZPS0479	JI1995	4	1	2	158	1	2	1
SZPS0511	JI2157	4	1	2	NA	1	2	1
SZPS0542	JI2329	2	2	1	78.7	1	2	1
SZPS0604	JI3086	4	1	2	81.7	1	2	1
SZPS0620	JI3639	NA	2	1	204.3	1	2	NA
SZPS0006	JI0007	4	1	2	64	1	2	1
SZPS0366	JI1462	1	1	1	129	1	2	1
SZPS0260	JI0825	1	1	1	NA	1	2	2
SZPS0106	JI0208	1	1	1	NA	1	2	2
SZPS0578	JI2671	NA	3	1	NA	1	2	2
SZPS0515	JI2182	4	1	2	153.3	1	2	1
SZPS0244	JI0782	2	1	1	NA	1	2	2
SZPS0534	JI2300	1	1	1	182.7	1	2	1
SZPS0285	JI0955	1	1	1	148	1	2	1
SZPS0257	JI0817	3	2	1	62.7	1	2	2
SZPS0233	JI0735	3	1	1	164.3	1	2	1
SZPS0095	JI0177	4	1	2	146	1	2	1
SZPS0392	JI1577	1	2	1	182.7	1	2	1
SZPS0343	JI1266	4	1	2	162.3	1	2	1
SZPS0216	JI0681	3	2	1	58	1	2	1
SZPS0586	JI2743	4	1	2	174.7	1	2	1
SZPS0151	JI0342	4	2	1	90.7	1	2	1
SZPS0530	JI2277	4	1	2	212.7	1	2	1
SZPS0432	JI1775	1	2	1	81.3	1	2	1
SZPS0552	JI2366	2	3	1	64	2	1	1
SZPS0269	JI0859	3	2	1	54.3	1	2	1
SZPS0528	JI2273	3	1	1	63.7	2	1	1
SZPS0445	JI1837	1	2	1	NA	1	2	1
SZPS0396	JI1587	2	1	1	166.7	1	2	1
SZPS0243	JI0781	3	2	1	46.7	1	2	1
SZPS0448	JI1850	4	1	2	196.5	1	2	1
SZPS0441	JI1825	1	1	1	NA	1	2	1
SZPS0208	JI0616	1	1	1	165.3	1	2	1
SZPS0410	JI1699	4	1	2	NA	1	2	1
SZPS0082	JI0149	NA	1	2	96.7	1	2	1
SZPS0562	JI2423	NA	1	2	NA	1	2	1
SZPS0413	JI1705	NA	NA	2	NA	1	NA	1
SZPS0326	JI1212	4	2	1	51.7	1	2	1
SZPS0224	JI0711	4	1	2	NA	1	2	1
SZPS0412	JI1704	NA	NA	2	NA	1	NA	1
SZPS0411	JI1702	4	1	2	NA	1	2	1
SZPS0609	JI3134	1	1	1	94.7	1	2	1
SZPS0105	JI0205	4	1	2	NA	1	2	1
SZPS0252	JI0807	1	1	2	NA	1	2	1
SZPS0079	JI0146	4	1	2	182	1	2	1
SZPS0602	JI3053	1	1	1	61.3	1	2	1
SZPS0030	JI0050	4	1	2	181.7	1	2	1
SZPS0603	JI3080	1	1	2	NA	1	2	1
SZPS0120	JI0246	1	1	2	NA	1	2	1
SZPE0025	JI2115	4	1	2	172.3	1	2	1
SZPS0444	JI1835	4	1	2	172	1	2	1
SZPS0501	JI2116	4	1	2	186	1	2	1
SZPS0505	JI2149	1	1	1	218.7	1	2	1
SZPS0443	JI1834	4	1	2	172	1	2	1
SZPS0510	JI2156	4	1	2	NA	1	2	1
SZPS0503	JI2129	4	1	2	240	1	2	1
SZPS0302	JI1059	NA	NA	1	NA	NA	NA	1
SZPS0130	JI0276	4	2	2	NA	1	2	1
SZPS0051	JI0086	4	1	2	NA	1	2	1
SZPS0239	JI0754	3	1	1	NA	1	2	1
SZPS0551	JI2355	4	1	2	NA	1	2	1
SZPS0563	JI2429	4	1	1	NA	1	2	1
SZPE0014	JI1089	4	1	2	NA	1	2	1
SZPS0384	JI1543	1	1	2	NA	1	2	1
SZPS0485	JI2018	4	1	2	129.7	1	2	1
SZPS0058	JI0102	4	1	2	NA	1	2	1
SZPS0226	JI0716	4	1	2	NA	1	2	1
SZPS0028	JI0047	1	1	2	45	1	2	1
SZPS0080	JI0147	4	1	2	NA	1	2	1
SZPS0309	JI1109	1	1	2	NA	1	2	1
SZPS0056	JI0098	4	1	2	122.3	1	2	1
SZPS0547	JI2348	1	1	1	NA	1	2	1
SZPS0393	JI1578	1	1	2	NA	1	2	1
SZPS0059	JI0108	1	1	2	NA	1	2	1
SZPS0310	JI1117	4	1	2	NA	1	2	1
SZPS0383	JI1542	1	1	2	NA	1	2	1
SZPE0054	JI0241	1	1	2	NA	1	2	1
SZPS0057	JI0099	4	1	2	NA	1	2	1
SZPS0060	JI0109	4	1	2	NA	1	2	1
SZPS0052	JI0087	1	1	2	NA	1	2	1
SZPS0474	JI1980	4	1	1	88	1	2	1
SZPS0109	JI0214	1	1	2	NA	1	2	1
SZPS0595	JI3006	4	1	2	NA	1	2	1
SZPS0066	JI0123	1	1	2	NA	1	2	1
SZPS0124	JI0252	1	1	2	NA	1	2	1
SZPS0311	JI1121	1	1	2	NA	1	2	1
SZPS0546	JI2345	1	1	1	NA	1	2	1
SZPS0050	JI0085	1	1	2	NA	1	2	1
SZPS0382	JI1539	1	1	2	NA	1	2	1
SZPS0123	JI0251	1	1	2	NA	1	2	1
SZPS0548	JI2349	1	3	1	159.3	1	2	1
SZPS0023	JI0039	4	1	2	NA	1	2	1
SZPS0340	JI1261	1	1	2	102.3	1	2	1
SZPS0097	JI0181	1	1	2	NA	1	2	1
SZPS0049	JI0084	1	2	2	125.3	1	2	1
SZPE0042	JI3162	1	1	2	NA	1	2	1
SZPS0364	JI1444	4	1	2	133.7	1	2	1
SZPS0621	JI2548	4	2	2	NA	1	2	1
SZPS0469	JI1956	4	2	2	139	1	2	1
SZPE0056	JI1854	4	1	2	NA	1	2	1
SZPE0031	JI3147	NA	NA	1	NA	NA	NA	1
SZPE0005	JI0261	1	1	2	NA	1	2	1
SZPE0057	JI2698	1	1	2	NA	1	2	NA
SZPE0023	JI2055	1	1	2	NA	1	2	1
SZPE0058	JI0249	1	2	2	NA	1	2	1
SZPE0015	JI1091	1	1	2	NA	1	2	1
SZPE0018	JI1094	1	1	2	NA	1	2	1
SZPE0017	JI1093	1	2	2	NA	1	2	1
SZPE0051	JI3553	1	1	2	NA	1	2	1
SZPE0016	JI1092	1	1	2	NA	1	2	1
SZPE0053	JI3558	1	1	2	NA	1	2	1
SZPE0019	JI1095	1	1	2	NA	1	2	1
SZPE0037	JI3155	1	1	2	NA	1	NA	1
SZPE0010	JI1074	1	1	2	NA	1	2	1
SZPE0030	JI2724	1	1	2	NA	1	2	1
SZPE0006	JI0262	1	1	2	NA	1	2	1
SZPE0044	JI3263	NA	1	2	NA	1	2	1
SZPE0001	JI0064	1	1	2	NA	1	2	1
SZPE0022	JI1795	1	1	2	NA	1	2	1
SZPE0041	JI3159	1	1	2	NA	1	2	1
SZPE0040	JI3158	1	1	2	NA	1	2	1
SZPE0011	JI1075	1	2	2	NA	1	2	1
SZPE0049	JI3276	NA	1	2	NA	1	2	1
SZPE0055	JI1794	1	2	2	NA	1	NA	1
SZPE0027	JI2538	NA	NA	2	NA	NA	NA	NA
SZPE0039	JI3157	1	1	2	NA	1	2	1
SZPE0038	JI3156	1	1	2	NA	1	2	1
SZPS0574	JI2611	4	1	2	177.3	1	2	1
SZPS0297	JI1035	1	1	2	NA	1	2	1
SZPS0266	JI0846	4	1	2	NA	1	2	1
SZPE0036	JI3153	1	1	2	NA	1	2	1
SZPS0437	JI1804	1	1	1	64.7	1	2	1
SZPF0004	JI1796	1	1	2	NA	1	2	1
SZPF0003	JI1010	1	1	2	NA	1	2	1
SZPF0011	JI2544	1	1	2	NA	1	2	1
SZPF0007	JI2517	1	1	2	NA	1	2	1
SZPF0010	JI2530	1	1	2	NA	1	2	1
SZPF0006	JI2473	1	1	2	NA	1	2	NA
SZPF0001	JI0224	1	2	2	NA	1	2	1
SZPE0004	JI0255	4	1	2	NA	1	2	1
SZPA0001	JI0002	4	1	2	51	1	2	1
SZPA0002	JI2202	1	1	2	91.3	1	2	1
SZPA0003	JI2385	4	1	2	57	1	2	1
SZPE0052	JI3557	NA	1	2	NA	1	2	1
SZPE0020	JI1096	1	2	2	NA	1	2	1
SZPE0047	JI3274	NA	NA	2	NA	1	2	1
SZPE0046	JI3273	NA	1	2	NA	1	2	1
SZPE0033	JI3149	1	1	2	NA	1	2	1
SZPE0048	JI3275	NA	2	2	NA	1	2	1
SZPF0009	JI2523	1	1	2	NA	1	2	1
SZPF0005	JI2206	1	1	2	NA	1	2	1
SZPF0008	JI2519	1	1	2	NA	1	2	1
SZPF0002	JI1006	1	1	2	NA	1	2	1
SZPS0064	JI0120	1	1	1	NA	1	NA	1
SZPS0601	JI3049	1	2	2	NA	1	2	1
SZPS0597	JI3025	4	2	2	NA	1	2	1
SZPS0238	JI0752	1	1	2	NA	1	2	1
SZPS0055	JI0094	4	1	2	NA	1	2	1
SZPS0606	JI3098	1	1	2	39.7	1	2	1
SZPE0024	JI2074	1	1	2	NA	1	2	1
SZPS0107	JI0209	4	1	2	NA	1	2	1
SZPE0003	JI0199	1	1	2	NA	1	2	1
SZPE0002	JI0198	1	1	2	NA	1	2	1
SZPE0007	JI0714	1	1	2	NA	1	2	1
SZPE0045	JI3271	NA	1	2	NA	1	2	1
SZPS0346	JI1270	1	1	2	122.3	1	2	1
SZPS0345	JI1269	4	1	2	107.7	1	2	1
SZPS0344	JI1268	4	1	2	106	1	2	1
SZPS0114	JI0223	1	1	1	NA	1	2	1
SZPS0447	JI1848	4	1	1	NA	1	2	1
SZPS0099	JI0185	4	2	2	123	1	2	1
SZPS0098	JI0184	4	1	1	150	1	2	1
SZPS0101	JI0189	4	1	2	104.7	1	2	1
SZPS0573	JI2603	4	1	2	150	1	2	1
SZPS0144	JI0328	4	1	2	129.7	1	2	1
SZPS0087	JI0157	4	1	2	133.3	1	2	1
SZPS0122	JI0250	4	1	2	NA	1	2	1
SZPS0102	JI0190	4	2	2	123.3	1	2	1
SZPS0046	JI0080	1	1	2	173.3	1	2	1
SZPS0021	JI0035	1	2	1	82	1	2	1
SZPS0037	JI0066	1	1	1	NA	1	1	1
SZPS0038	JI0067	4	1	2	110.3	1	NA	1
SZPS0039	JI0069	1	1	1	NA	1	NA	1
SZPS0045	JI0079	4	1	2	106	1	2	1
SZPS0053	JI0089	1	1	1	155.3	1	2	1
SZPS0078	JI0145	1	2	1	64	1	2	1
SZPS0084	JI0151	4	1	1	142	1	2	1
SZPS0089	JI0166	4	1	2	NA	1	2	1
SZPS0091	JI0172	4	1	2	179	1	2	1
SZPS0092	JI0174	2	1	2	203.3	1	2	1
SZPS0100	JI0188	4	1	2	55	1	2	1
SZPS0103	JI0191	4	1	2	150.3	1	2	1
SZPS0115	JI0228	1	1	2	NA	1	2	1
SZPS0117	JI0237	4	1	2	155	1	2	1
SZPS0118	JI0240	2	1	2	168.3	1	2	1
SZPS0131	JI0288	1	1	2	NA	1	2	1
SZPS0134	JI0301	2	2	1	174.3	1	2	1
SZPS0137	JI0305	3	2	1	NA	1	2	1
SZPS0145	JI0329	4	1	1	119.3	1	2	1
SZPS0154	JI0356	1	1	1	158	1	2	1
SZPS0167	JI0399	5	2	1	45	1	2	1
SZPS0172	JI0411	1	2	1	67	1	2	1
SZPS0183	JI0467	4	1	2	62	1	1	1
SZPS0191	JI0531	3	2	1	104.3	1	2	1
SZPS0197	JI0558	4	1	1	27	1	2	1
SZPS0198	JI0560	4	2	1	65.7	1	2	1
SZPS0203	JI0574	1	2	1	67.7	1	2	1
SZPS0210	JI0651	3	1	1	63.7	1	2	1
SZPS0221	JI0701	4	1	2	199	1	1	1
SZPS0263	JI0837	2	2	1	126.3	1	2	1
SZPS0289	JI0968	1	1	1	178	1	2	1
SZPS0298	JI1041	2	1	2	243	1	1	1
SZPS0304	JI1078	4	1	2	197	1	2	1
SZPS0306	JI1084	4	1	2	172.3	1	2	1
SZPS0316	JI1147	1	2	1	101	1	2	1
SZPS0337	JI1245	4	1	1	185.3	1	NA	1
SZPS0339	JI1260	4	1	2	161	1	2	1
SZPS0341	JI1263	4	1	2	163.7	1	2	1
SZPS0342	JI1265	1	1	1	142	1	2	1
SZPS0357	JI1366	1	1	1	171.3	1	2	1
SZPS0359	JI1395	4	1	2	174.7	1	2	1
SZPS0361	JI1407	1	2	1	156	1	2	1
SZPS0363	JI1434	4	1	2	147	1	2	1
SZPS0365	JI1453	4	1	2	147.3	1	2	1
SZPS0367	JI1464	1	1	1	168.3	1	2	1
SZPS0368	JI1469	4	1	2	128	1	2	1
SZPS0379	JI1529	1	1	2	144.7	1	2	1
SZPS0394	JI1581	1	1	1	180	1	2	1
SZPS0395	JI1585	4	1	2	151.3	1	2	1
SZPS0397	JI1588	1	1	1	149.7	1	2	1
SZPS0398	JI1590	2	1	2	152.3	1	2	1
SZPS0403	JI1636	4	1	2	151.7	1	2	1
SZPS0404	JI1639	4	1	2	183.3	1	2	1
SZPS0406	JI1663	4	1	2	176	1	2	1
SZPE0059	JI1707	NA	NA	2	NA	1	NA	1
SZPS0421	JI1724	1	2	1	139.3	1	2	1
SZPS0454	JI1885	4	1	2	190.5	1	2	1
SZPS0461	JI1919	4	1	2	190	1	2	1
SZPS0466	JI1946	4	1	2	197	1	2	1
SZPS0467	JI1947	4	1	2	184.3	1	2	1
SZPS0468	JI1948	4	1	2	174	1	2	1
SZPS0470	JI1962	4	1	1	163	1	2	1
SZPS0471	JI1967	1	1	2	193.3	1	2	1
SZPS0473	JI1971	4	1	2	171	1	2	1
SZPS0475	JI1981	1	1	1	174	1	2	1
SZPS0476	JI1985	1	1	1	191.7	1	2	1
SZPS0494	JI2100	1	1	1	NA	1	1	1
SZPS0495	JI2104	4	1	2	174.3	1	2	1
SZPS0497	JI2106	4	2	1	39.5	1	2	1
SZPS0502	JI2126	1	1	1	189	1	2	1
SZPS0514	JI2177	4	1	2	159	1	1	1
SZPS0524	JI2240	1	2	1	96	1	2	1
SZPS0526	JI2257	1	1	1	173	1	2	NA
SZPS0532	JI2294	4	2	1	84.7	1	2	1
SZPS0535	JI2301	1	1	1	198.3	1	2	1
SZPS0555	JI2389	1	2	1	72.3	1	2	1
SZPS0576	JI2644	4	1	1	180.7	1	2	1
SZPS0579	JI2683	1	1	1	157.7	1	1	1
SZPS0607	JI3119	2	1	2	165.7	1	NA	1
SZPS0478	JI1991	1	1	2	165	1	2	1
SZPS0274	JI0884	2	2	1	57	1	2	1
SZPS0463	JI1921	4	1	2	NA	1	2	1
SZPS0440	JI1822	1	2	1	NA	1	2	1
SZPS0014	JI0022	6	1	2	110	1	2	1
SZPS0019	JI0033	6	1	1	99	1	1	1
SZPS0022	JI0037	5	2	1	138	1	2	1
SZPS0025	JI0043	5	1	1	128.3	1	2	1
SZPS0027	JI0046	5	1	2	96	2	NA	1
SZPS0035	JI0061	5	2	1	NA	1	1	1
SZPS0041	JI0072	6	1	1	50.3	1	2	1
SZPS0042	JI0073	5	2	2	NA	2	2	1
SZPS0043	JI0074	5	1	2	124.7	1	1	1
SZPS0044	JI0077	6	2	1	146.7	1	1	1
SZPS0047	JI0082	6	2	1	135.3	1	2	1
SZPS0061	JI0114	6	1	1	89	1	2	1
SZPS0065	JI0122	5	2	1	87.7	1	1	1
SZPS0069	JI0127	NA	2	2	NA	1	2	1
SZPS0071	JI0131	5	2	2	NA	1	2	1
SZPS0074	JI0134	5	2	2	NA	1	1	1
SZPS0075	JI0136	5	1	1	NA	2	1	1
SZPS0077	JI0144	6	2	1	64.7	1	2	1
SZPS0133	JI0298	NA	NA	1	90.7	1	NA	1
SZPS0135	JI0303	6	1	1	154.7	1	2	1
SZPS0136	JI0304	6	2	1	193.3	1	2	1
SZPS0138	JI0314	NA	NA	1	57	1	NA	1
SZPS0139	JI0318	5	2	1	53.3	1	2	1
SZPS0140	JI0319	6	2	1	72	1	2	1
SZPS0143	JI0327	6	2	1	62.3	1	2	1
SZPS0156	JI0361	6	2	1	81	1	2	1
SZPS0164	JI0383	6	2	1	NA	1	2	1
SZPS0165	JI0389	6	2	1	77.3	1	2	1
SZPS0168	JI0400	6	2	1	64.7	1	2	1
SZPS0169	JI0402	6	2	1	72.3	1	2	1
SZPS0170	JI0406	6	2	1	72.7	1	2	1
SZPS0173	JI0417	6	1	1	88	1	2	1
SZPS0174	JI0420	5	2	1	89.7	1	2	1
SZPS0177	JI0428	6	2	1	79	1	2	1
SZPS0178	JI0430	6	2	1	95.3	1	2	1
SZPS0179	JI0434	NA	NA	1	66	1	NA	1
SZPS0180	JI0441	6	2	1	50.7	1	2	1
SZPS0181	JI0460	NA	2	1	58	1	2	1
SZPS0184	JI0474	5	2	1	74	1	2	1
SZPS0185	JI0491	5	2	1	47.7	1	2	1
SZPS0186	JI0496	6	2	1	78.3	1	2	1
SZPS0187	JI0498	6	2	1	89	1	2	1
SZPS0188	JI0504	6	1	1	90.3	1	2	1
SZPS0189	JI0506	6	2	1	83	1	2	1
SZPS0192	JI0536	5	2	1	65	1	2	1
SZPS0193	JI0539	6	2	1	101.7	1	2	1
SZPS0194	JI0546	5	2	1	105	1	2	1
SZPS0195	JI0550	5	2	1	86.3	1	2	1
SZPS0196	JI0554	5	1	1	86.3	1	2	1
SZPS0200	JI0568	6	2	1	70.7	1	2	2
SZPS0201	JI0571	6	2	1	50.3	1	2	1
SZPS0202	JI0573	6	2	1	NA	1	2	1
SZPS0204	JI0582	5	2	1	77	1	2	1
SZPS0205	JI0584	5	2	1	53	1	2	1
SZPS0206	JI0607	6	NA	1	74.7	1	2	1
SZPS0207	JI0614	NA	2	1	104.7	1	2	1
SZPS0211	JI0653	6	2	1	127	1	2	1
SZPS0213	JI0662	6	2	1	94.3	1	2	1
SZPS0214	JI0665	5	2	1	84.7	1	2	1
SZPS0215	JI0670	5	1	1	111.7	1	2	1
SZPS0229	JI0720	6	2	1	81	1	2	1
SZPS0230	JI0721	5	2	1	58.7	1	2	1
SZPS0231	JI0727	6	2	1	70.3	1	2	1
SZPS0234	JI0737	6	2	1	76	1	2	1
SZPS0235	JI0738	5	2	1	NA	1	2	1
SZPS0236	JI0745	5	2	1	86	1	2	1
SZPS0237	JI0746	6	2	1	78.3	1	2	1
SZPS0241	JI0774	6	2	1	59.5	1	2	1
SZPS0242	JI0780	6	2	1	67	1	2	2
SZPS0246	JI0790	6	2	1	56	1	2	1
SZPS0249	JI0799	6	2	1	NA	1	2	1
SZPS0250	JI0804	5	2	2	167.7	1	2	1
SZPS0251	JI0806	6	1	2	260	1	1	1
SZPS0255	JI0814	6	2	1	58.3	1	2	2
SZPS0256	JI0815	6	1	1	64.3	1	2	NA
SZPS0258	JI0819	NA	1	1	49	1	NA	2
SZPS0261	JI0829	6	2	1	138	1	2	1
SZPS0262	JI0832	6	1	1	192.3	1	2	1
SZPS0264	JI0841	NA	2	1	NA	1	2	1
SZPS0265	JI0844	NA	2	1	NA	1	2	1
SZPS0267	JI0853	6	2	1	49.3	1	2	2
SZPS0278	JI0907	6	2	1	88.7	1	2	1
SZPS0279	JI0909	NA	2	2	62.3	1	2	1
SZPS0282	JI0935	6	NA	1	85	1	2	1
SZPS0292	JI0991	6	2	1	29	1	2	1
SZPS0295	JI1017	6	2	1	52.3	1	2	1
SZPS0296	JI1018	5	2	1	NA	1	2	1
SZPS0313	JI1128	5	2	1	220.3	1	2	1
SZPS0317	JI1165	NA	2	1	156.3	1	2	1
SZPS0319	JI1179	6	1	1	48.5	1	2	1
SZPS0321	JI1194	5	2	1	87.3	1	2	1
SZPS0322	JI1200	6	2	1	68.7	1	2	1
SZPS0323	JI1201	5	2	1	55.7	1	2	1
SZPS0324	JI1205	5	2	1	82	1	2	1
SZPS0325	JI1210	NA	NA	1	81.7	1	NA	1
SZPS0327	JI1214	6	2	1	68.3	1	2	1
SZPS0332	JI1227	5	1	1	65	1	2	1
SZPS0334	JI1229	6	1	1	91	1	2	1
SZPS0335	JI1231	5	2	1	54	1	2	1
SZPS0336	JI1237	5	2	1	49	1	2	1
SZPS0348	JI1277	6	2	1	84.3	1	2	1
SZPS0349	JI1280	6	2	1	67.3	1	2	1
SZPS0350	JI1282	6	2	1	74.3	1	2	1
SZPS0351	JI1294	6	2	1	69.3	1	2	1
SZPS0352	JI1303	6	2	1	67.7	1	2	1
SZPS0354	JI1313	6	2	1	39	1	2	1
SZPS0362	JI1423	5	2	1	56.3	1	2	1
SZPS0388	JI1562	5	2	1	71	1	2	1
SZPS0389	JI1569	5	2	1	67.3	1	2	1
SZPS0418	JI1720	5	2	1	161	1	2	1
SZPS0419	JI1721	5	2	1	179.3	1	2	1
SZPS0422	JI1732	6	2	1	163	1	2	1
SZPS0423	JI1733	6	2	1	185	1	2	1
SZPS0425	JI1737	6	1	2	84.3	1	2	1
SZPS0426	JI1747	NA	2	1	59	1	2	1
SZPS0427	JI1748	5	2	1	72	1	2	1
SZPS0428	JI1762	5	1	1	82.7	1	2	1
SZPS0430	JI1772	5	2	1	NA	1	2	1
SZPS0442	JI1829	6	2	1	92.3	1	2	1
SZPS0483	JI2016	5	2	2	88.3	1	2	1
SZPS0484	JI2017	6	2	2	86	1	2	1
SZPS0490	JI2081	6	2	2	NA	1	2	1
SZPS0491	JI2083	5	2	2	NA	1	2	1
SZPS0498	JI2108	6	2	1	129	1	2	1
SZPS0517	JI2217	6	1	2	183.3	1	2	1
SZPS0518	JI2219	6	2	1	81.7	1	2	1
SZPS0519	JI2221	6	2	1	72	1	2	1
SZPS0527	JI2262	5	1	2	122.7	1	1	1
SZPS0539	JI2317	6	2	1	34.5	1	2	1
SZPS0554	JI2374	6	2	1	87.7	1	2	1
SZPS0556	JI2393	6	2	1	99	1	2	1
SZPS0557	JI2394	6	2	1	85.7	1	2	1
SZPS0558	JI2401	6	2	1	67.3	1	2	1
SZPS0559	JI2402	6	2	1	57.3	1	2	1
SZPS0560	JI2403	6	2	1	77	1	2	1
SZPS0561	JI2410	6	2	1	66.7	1	2	1
SZPS0564	JI2434	5	2	1	52.7	1	2	1
SZPS0566	JI2464	5	2	1	77.7	1	2	1
SZPS0567	JI2500	6	2	1	68.7	1	2	1
SZPS0568	JI2501	6	2	1	56.3	1	2	1
SZPS0572	JI2595	6	1	1	121	1	2	1
SZPS0581	JI2699	6	1	2	143.3	1	2	1
SZPS0583	JI2711	6	2	1	NA	1	2	1
SZPS0592	JI2782	6	2	2	55	1	2	1
SZPS0593	JI2787	6	2	1	85	1	2	1
SZPS0598	JI3027	6	2	1	65.7	1	2	1
SZPS0599	JI3029	6	2	1	79.3	1	2	1
SZPS0146	JI0330	6	2	1	111.3	1	2	1
SZPS0147	JI0335	6	1	1	123	1	2	1
SZPS0271	JI0870	5	2	1	203	1	2	1
SZPS0272	JI0874	NA	1	1	70.7	1	2	1
SZPS0273	JI0877	6	2	1	86.3	1	2	1
SZPS0553	JI2371	NA	NA	1	76.7	1	2	1
SZPS0588	JI2757	NA	3	2	171	1	2	1
SZPS0253	JI0808	NA	1	1	58.7	1	2	1
SZPS0017	JI0026	1	2	2	69	1	2	1
SZPS0011	JI0019	1	2	2	183.7	1	2	1
SZPS0108	JI0210	3	1	1	69	1	2	1
SZPS0125	JI0257	4	1	1	58.3	1	2	1
SZPS0150	JI0341	3	1	1	68.7	1	2	1
SZPS0152	JI0344	3	1	1	100.7	1	2	1
SZPS0157	JI0362	4	1	1	39.3	1	2	1
SZPS0160	JI0369	1	1	1	71.3	1	2	1
SZPS0228	JI0718	2	1	2	127.7	1	2	1
SZPS0240	JI0757	4	2	1	85.7	1	2	1
SZPS0280	JI0930	1	1	1	30.7	1	2	1
SZPS0287	JI0958	1	1	1	155.5	1	2	2
SZPS0347	JI1272	NA	NA	1	90.7	1	NA	1
SZPS0387	JI1555	4	1	1	27	1	2	1
SZPS0391	JI1575	1	1	1	64.3	1	2	1
SZPS0431	JI1774	1	2	1	29.7	1	2	1
SZPS0433	JI1791	1	2	1	82.7	1	2	1
SZPS0464	JI1922	1	1	1	68.7	1	2	1
SZPS0482	JI2007	1	2	1	69	1	2	1
SZPS0512	JI2160	4	2	2	83.3	1	2	1
SZPS0608	JI3120	4	1	2	86.3	1	1	1

## Sheet: Table S7
Supplementary Table 7. Summary statistic on the identification of short insertions and deletion (InDels, <=50bp) in this study. Statistics are given for the raw Indels and high-quality Indels after a series of quality control processes (bi-allelic filtering, hard filtering, Inbreeding Coefficient). Data is shown for each of the 7 pea chromosomes. In total, 18.7 millions of high-quality Indels wer…
[truncated: 20 more rows]

[truncated: 4 more sheets: Table S8, Table S9, Table S10, Table S11]
